# Supplementary material for: Dynamic post-translational modification profiling of Mycobacterium tuberculosis-infected primary macrophages
Source: eLife. 2020 Jan 17;9:e51461. doi: 10.7554/eLife.51461 (PMC7030789; doi:10.7554/eLife.51461)
Supplement: Supplementary file 3. [file elife-51461-supp3.xlsx]

## Sheet: Phosphorylated
Protein	Gene	Uniprot_PTM	Comparison	log2FC	pvalue	adj.pvalue	imputed	iLog2FC	iPvalue
Q64337	Sqstm1	Q64337_S152	TB_24H-MOCK_24H	#NUM!		0	yes	5.69822	0.0230864
Q64337	Sqstm1	Q64337_S226	TB_24H-MOCK_24H	#NUM!		0	yes	8.61184	0.0233981
Q64337	Sqstm1	Q64337_S24	TB_24H-MOCK_24H	1.96214	0.0019073	0.0318026	no	1.96214	0.0019073
Q64337	Sqstm1	Q64337_S28	TB_24H-MOCK_24H	#NUM!		0	yes	8.24613	0.0353994
Q64337	Sqstm1	Q64337_S330	TB_24H-MOCK_24H	1.55636	0.0668424	0.31912	no	1.55636	0.0668424
Q64337	Sqstm1	Q64337_S330;Q64337_S334	TB_24H-MOCK_24H	#NUM!		0	yes	6.53342	0.0425644
Q64337	Sqstm1	Q64337_S334	TB_24H-MOCK_24H	2.64226	0.144777	0.483993	no	2.64226	0.144777
Q8K3K8	Optn	Q8K3K8_S187	TB_24H-MOCK_24H	#NUM!		0	yes	8.19767	0.0376343
Q8K3K8	Optn	Q8K3K8_T214	TB_24H-MOCK_24H	0.390571	0.308436	0.686805	no	0.390571	0.308436
Q9DB70	Fundc1	Q9DB70_S13	TB_24H-MOCK_24H	-0.624512	0.184132	0.540621	no	-0.624512	0.184132
Q9DB70	Fundc1	Q9DB70_S17	TB_24H-MOCK_24H	-0.0972837	0.895566	0.965296	no	-0.0972837	0.895566
Q9DB70	Fundc1	Q9DB70_Y18	TB_24H-MOCK_24H	-0.542711	0.0563446	0.293228	no	-0.542711	0.0563446
Q9Z2F7	Bnip3l	Q9Z2F7_S116	TB_24H-MOCK_24H	0.449179	0.336501	0.707518	no	0.449179	0.336501
Q9Z2F7	Bnip3l	Q9Z2F7_S136;Q9Z2F7_S141;Q9Z2F7_S145	TB_24H-MOCK_24H	0.0814079	0.844159	0.950991	no	0.0814079	0.844159
Q9Z2F7	Bnip3l	Q9Z2F7_S141;Q9Z2F7_S144	TB_24H-MOCK_24H	-0.560618	0.206424	0.570346	no	-0.560618	0.206424
Q9Z2F7	Bnip3l	Q9Z2F7_S61;Q9Z2F7_S62	TB_24H-MOCK_24H	-0.502817	0.325211	0.700754	no	-0.502817	0.325211
Q9Z2F7	Bnip3l	Q9Z2F7_S61;Q9Z2F7_S63	TB_24H-MOCK_24H	0.530049	0.384156	0.740755	no	0.530049	0.384156
Q3UKC1	Tax1bp1	Q3UKC1_S693	TB_24H-MOCK_24H	NA	NA	NA	yes	7.41578	0.0283412
Q3UKC1	Tax1bp1	Q3UKC1_S693	TB_02H-MOCK_00H	NA	NA	NA	yes	5.92642	0.0404622
Q64337	Sqstm1	Q64337_S24	TB_02H-MOCK_00H	1.56067	0.00286729	0.0639052	no	1.56067	0.00286729
Q64337	Sqstm1	Q64337_S330	TB_02H-MOCK_00H	0.854222	0.365396	0.783009	no	0.854222	0.365396
Q64337	Sqstm1	Q64337_S372	TB_02H-MOCK_00H	#NUM!		0	yes	5.56476	0.0297994
Q8K3K8	Optn	Q8K3K8_S187	TB_02H-MOCK_00H	1.33092	0.0125264	0.152959	no	1.33092	0.0125264
Q8K3K8	Optn	Q8K3K8_S556	TB_02H-MOCK_00H	#NUM!		0	yes	7.60055	0.022843
Q8K3K8	Optn	Q8K3K8_T210;Q8K3K8_T212	TB_02H-MOCK_00H	#NUM!		0	yes	5.41328	0.0159221
Q8K3K8	Optn	Q8K3K8_T214	TB_02H-MOCK_00H	#NUM!		0	yes	8.68775	0.031675
Q8K3K8	Optn	Q8K3K8_T529	TB_02H-MOCK_00H	0.0971931	0.863337	0.966645	no	0.0971931	0.863337
Q9DB70	Fundc1	Q9DB70_S13	TB_02H-MOCK_00H	#NUM!		0	yes	5.96119	0.0120822
Q9DB70	Fundc1	Q9DB70_S17	TB_02H-MOCK_00H	0.0516045	0.921548	0.978746	no	0.0516045	0.921548
Q9DB70	Fundc1	Q9DB70_Y18	TB_02H-MOCK_00H	-0.369676	0.177188	0.591961	no	-0.369676	0.177188
Q9Z2F7	Bnip3l	Q9Z2F7_S61;Q9Z2F7_S62	TB_02H-MOCK_00H	0.129504	0.842806	0.961384	no	0.129504	0.842806
Q9Z2F7	Bnip3l	Q9Z2F7_S61;Q9Z2F7_S63	TB_02H-MOCK_00H	-0.493785	0.50644	0.844695	no	-0.493785	0.50644
Q3UKC1	Tax1bp1	Q3UKC1_S693	TB_04H-MOCK_00H	NA	NA	NA	yes	7.36834	0.0236635
Q64337	Sqstm1	Q64337_S226	TB_04H-MOCK_00H	#NUM!		0	yes	6.77866	0.0459933
Q64337	Sqstm1	Q64337_S24	TB_04H-MOCK_00H	1.72855	0.00122835	0.0329851	no	1.72855	0.00122835
Q64337	Sqstm1	Q64337_S28	TB_04H-MOCK_00H	#NUM!		0	yes	5.59413	0.0315605
Q64337	Sqstm1	Q64337_S320	TB_04H-MOCK_00H	4.55108	0.0982372	0.412661	no	4.55108	0.0982372
Q64337	Sqstm1	Q64337_S330	TB_04H-MOCK_00H	0.866311	0.358755	0.717836	no	0.866311	0.358755
Q64337	Sqstm1	Q64337_S372	TB_04H-MOCK_00H	#NUM!		0	yes	4.51582	0.025807
Q8K3K8	Optn	Q8K3K8_S187	TB_04H-MOCK_00H	1.44942	0.00594191	0.0896601	no	1.44942	0.00594191
Q8K3K8	Optn	Q8K3K8_S530	TB_04H-MOCK_00H	#NUM!		0	yes	4.66939	0.0138622
Q8K3K8	Optn	Q8K3K8_S556	TB_04H-MOCK_00H	#NUM!		0	yes	3.40164	0.0371011
Q8K3K8	Optn	Q8K3K8_T210;Q8K3K8_T212	TB_04H-MOCK_00H	#NUM!		0	yes	4.11846	0.0280366
Q8K3K8	Optn	Q8K3K8_T214	TB_04H-MOCK_00H	#NUM!		0	yes	6.85908	0.0248774
Q8K3K8	Optn	Q8K3K8_T529	TB_04H-MOCK_00H	-0.356933	0.531208	0.836105	no	-0.356933	0.531208
Q9DB70	Fundc1	Q9DB70_S17	TB_04H-MOCK_00H	-0.513054	0.31052	0.676447	no	-0.513054	0.31052
Q9DB70	Fundc1	Q9DB70_Y18	TB_04H-MOCK_00H	0.738049	0.0136899	0.148379	no	0.738049	0.0136899
Q9Z2F7	Bnip3l	Q9Z2F7_S116	TB_04H-MOCK_00H	#NUM!		0	yes	3.72257	0.0453683
Q9Z2F7	Bnip3l	Q9Z2F7_S136;Q9Z2F7_S141;Q9Z2F7_S145	TB_04H-MOCK_00H	-0.0790323	0.892592	0.972423	no	-0.0790323	0.892592
Q9Z2F7	Bnip3l	Q9Z2F7_S141;Q9Z2F7_S144	TB_04H-MOCK_00H	0.395609	0.385069	0.740429	no	0.395609	0.385069
Q9Z2F7	Bnip3l	Q9Z2F7_S61;Q9Z2F7_S62	TB_04H-MOCK_00H	0.69039	0.303384	0.670912	no	0.69039	0.303384
Q9Z2F7	Bnip3l	Q9Z2F7_S61;Q9Z2F7_S63	TB_04H-MOCK_00H	-0.708346	0.283798	0.652151	no	-0.708346	0.283798
Q3UKC1	Tax1bp1	Q3UKC1_693	TB_06H-MOCK_06H	2.06667	0.000914549	0.0565095	no	2.06667	0.000914549
Q64337	Sqstm1	Q64337_S226	TB_06H-MOCK_06H	1.76935	0.00164761	0.0805954	no	1.76935	0.00164761
Q64337	Sqstm1	Q64337_S24	TB_06H-MOCK_06H	0.182722	0.65564	0.950947	no	0.182722	0.65564
Q64337	Sqstm1	Q64337_S320	TB_06H-MOCK_06H	-1.05753	0.536359	0.922049	no	-1.05753	0.536359
Q64337	Sqstm1	Q64337_S330	TB_06H-MOCK_06H	1.04962	0.208694	0.757963	no	1.04962	0.208694
Q64337	Sqstm1	Q64337_S334	TB_06H-MOCK_06H	-0.17681	0.894588	0.988616	no	-0.17681	0.894588
Q64337	Sqstm1	Q64337_S372	TB_06H-MOCK_06H	1.469	0.0715912	0.533763	no	1.469	0.0715912
Q8K3K8	Optn	Q8K3K8_S187	TB_06H-MOCK_06H	#NUM!		0	yes	8.23266	0.0148654
Q8K3K8	Optn	Q8K3K8_T210;Q8K3K8_T212	TB_06H-MOCK_06H	1.582	0.000461485	0.0382019	no	1.582	0.000461485
Q8K3K8	Optn	Q8K3K8_T214	TB_06H-MOCK_06H	0.101307	0.793418	0.979648	no	0.101307	0.793418
Q8K3K8	Optn	Q8K3K8_T529	TB_06H-MOCK_06H	-0.157321	0.694511	0.957365	no	-0.157321	0.694511
Q9DB70	Fundc1	Q9DB70_S13	TB_06H-MOCK_06H	0.154282	0.644158	0.949125	no	0.154282	0.644158
Q9DB70	Fundc1	Q9DB70_S17	TB_06H-MOCK_06H	0.0340011	0.963399	0.995196	no	0.0340011	0.963399
Q9DB70	Fundc1	Q9DB70_Y11	TB_06H-MOCK_06H	#NUM!		0	yes	-6.49654	0.0410347
Q9DB70	Fundc1	Q9DB70_Y18	TB_06H-MOCK_06H	0.614416	0.0748694	0.544707	no	0.614416	0.0748694
Q9Z2F7	Bnip3l	Q9Z2F7_S136;Q9Z2F7_S141;Q9Z2F7_S145	TB_06H-MOCK_06H	-0.537859	0.342253	0.843927	no	-0.537859	0.342253
Q9Z2F7	Bnip3l	Q9Z2F7_S141;Q9Z2F7_S144	TB_06H-MOCK_06H	-1.11595	0.0242461	0.350591	no	-1.11595	0.0242461
Q9Z2F7	Bnip3l	Q9Z2F7_S61;Q9Z2F7_S62	TB_06H-MOCK_06H	-0.241176	0.712591	0.960852	no	-0.241176	0.712591
Q9Z2F7	Bnip3l	Q9Z2F7_S61;Q9Z2F7_S63	TB_06H-MOCK_06H	-0.696134	0.256012	0.794457	no	-0.696134	0.256012
Q3UKC1	Tax1bp1	Q3UKC1_693	TB_08H-MOCK_06H	2.10285	0.000339207	0.029069	no	2.10285	0.000339207
Q64337	Sqstm1	Q64337_S152	TB_08H-MOCK_06H	#NUM!		0	yes	5.53046	0.0488791
Q64337	Sqstm1	Q64337_S226	TB_08H-MOCK_06H	1.10834	0.0277601	0.315789	no	1.10834	0.0277601
Q64337	Sqstm1	Q64337_S24	TB_08H-MOCK_06H	0.303457	0.516577	0.868648	no	0.303457	0.516577
Q64337	Sqstm1	Q64337_S28	TB_08H-MOCK_06H	1.76639	0.235369	0.70098	no	1.76639	0.235369
Q64337	Sqstm1	Q64337_S320	TB_08H-MOCK_06H	-1.65682	0.309643	0.75759	no	-1.65682	0.309643
Q64337	Sqstm1	Q64337_S330	TB_08H-MOCK_06H	0.187547	0.800697	0.962569	no	0.187547	0.800697
Q64337	Sqstm1	Q64337_S330;Q64337_S334	TB_08H-MOCK_06H	0.0579626	0.926681	0.984246	no	0.0579626	0.926681
Q64337	Sqstm1	Q64337_S334	TB_08H-MOCK_06H	-0.902782	0.482668	0.858692	no	-0.902782	0.482668
Q64337	Sqstm1	Q64337_S372	TB_08H-MOCK_06H	0.54543	0.330266	0.772942	no	0.54543	0.330266
Q8K3K8	Optn	Q8K3K8_S187	TB_08H-MOCK_06H	#NUM!		0	yes	8.41966	0.0198977
Q8K3K8	Optn	Q8K3K8_T210;Q8K3K8_T212	TB_08H-MOCK_06H	1.88549	0.000153168	0.0182935	no	1.88549	0.000153168
Q8K3K8	Optn	Q8K3K8_T529	TB_08H-MOCK_06H	-0.278034	0.537139	0.877807	no	-0.278034	0.537139
Q9DB70	Fundc1	Q9DB70_S13	TB_08H-MOCK_06H	0.20109	0.629455	0.91447	no	0.20109	0.629455
Q9DB70	Fundc1	Q9DB70_S17	TB_08H-MOCK_06H	-0.52841	0.47951	0.857612	no	-0.52841	0.47951
Q9DB70	Fundc1	Q9DB70_Y11	TB_08H-MOCK_06H	#NUM!		0	yes	-6.65167	0.047348
Q9DB70	Fundc1	Q9DB70_Y18	TB_08H-MOCK_06H	0.499279	0.139617	0.604103	no	0.499279	0.139617
Q9Z2F7	Bnip3l	Q9Z2F7_S116	TB_08H-MOCK_06H	-0.36524	0.50888	0.866619	no	-0.36524	0.50888
Q9Z2F7	Bnip3l	Q9Z2F7_S136;Q9Z2F7_S141;Q9Z2F7_S145	TB_08H-MOCK_06H	0.168766	0.666905	0.928423	no	0.168766	0.666905
Q9Z2F7	Bnip3l	Q9Z2F7_S141;Q9Z2F7_S144	TB_08H-MOCK_06H	-0.592265	0.172493	0.643988	no	-0.592265	0.172493
Q9Z2F7	Bnip3l	Q9Z2F7_S61;Q9Z2F7_S62	TB_08H-MOCK_06H	#NUM!		0	yes	-6.02034	0.0135595
Q9Z2F7	Bnip3l	Q9Z2F7_S61;Q9Z2F7_S63	TB_08H-MOCK_06H	-0.202716	0.737373	0.945034	no	-0.202716	0.737373

## Sheet: Ubiquitylated
Protein	Gene	Uniprot_PTM	Comparison	log2FC	pvalue	adj.pvalue	imputed	iLog2FC	iPvalue
Q64337	Sqstm1	Q64337_K13	TB_24H-MOCK_24H	1.23089	0.0271922	0.088709	no	1.23089	0.088709
Q64337	Sqstm1	Q64337_K13	TB_08H-MOCK_06H	0.89702	0.0034211	0.0413325	no	0.89702	0.0413325
Q64337	Sqstm1	Q64337_K13	TB_06H-MOCK_06H	0.877415	0.00593951	0.0793044	no	0.877415	0.0793044
Q64337	Sqstm1	Q64337_K13	TB_04H-MOCK_00H	1.25979	9.57557e-05	0.00472395	no	1.25979	0.00472395
Q64337	Sqstm1	Q64337_K13	TB_02H-MOCK_00H	0.299314	0.30107	0.835684	no	0.299314	0.835684
Q64337	Sqstm1	Q64337_K157	TB_04H-MOCK_00H	NA	NA	NA	yes	6.86109	0.0245186
Q64337	Sqstm1	Q64337_K157	TB_02H-MOCK_00H	NA	NA	NA	yes	5.68868	0.0143226
Q64337	Sqstm1	Q64337_K157	TB_24H-MOCK_24H	2.01471	0.000808264	0.00540654	no	2.01471	0.00540654
Q64337	Sqstm1	Q64337_K157	TB_08H-MOCK_06H	3.03924	4.79499e-07	3.40636e-05	no	3.03924	3.40636e-05
Q64337	Sqstm1	Q64337_K157	TB_06H-MOCK_06H	2.50985	9.75099e-06	0.0006781	no	2.50985	0.0006781
Q64337	Sqstm1	Q64337_K437	TB_06H-MOCK_06H	NA	NA	NA	yes	4.83985	0.0187878
Q64337	Sqstm1	Q64337_K437	TB_04H-MOCK_00H	NA	NA	NA	yes	5.38904	0.012634
Q64337	Sqstm1	Q64337_K437	TB_02H-MOCK_00H	NA	NA	NA	yes	4.67918	0.017179
Q64337	Sqstm1	Q64337_K437	TB_08H-MOCK_06H	NA	NA	NA	yes	7.21987	0.0332494
Q64337	Sqstm1	Q64337_K437	TB_24H-MOCK_24H	3.36573	9.94585e-05	0.000948132	no	3.36573	0.000948132

## Sheet: Abundance
Protein	Gene	Uniprot_PTM	Comparison	log2FC	pvalue	imputed
Q64337	Sqstm1	TB_24H-MOCK_24H	2.09923	1.1948e-09	7.58205e-08	no
Q64337	Sqstm1	TB_04H-MOCK_00H	1.99564	3.12414e-09	1.10737e-06	no
Q64337	Sqstm1	TB_06H-MOCK_06H	1.46643	6.6841e-07	8.45e-05	no
Q64337	Sqstm1	TB_08H-MOCK_06H	1.38475	1.63423e-06	0.000133019	no
Q64337	Sqstm1	TB_02H-MOCK_00H	0.965288	0.000194874	0.0584471	no
Q3UKC1	Tax1bp1	TB_24H-MOCK_24H	1.36805	3.80057e-05	0.000690705	no
Q3UKC1	Tax1bp1	TB_08H-MOCK_06H	1.1898	0.000234009	0.00869201	no
Q3UKC1	Tax1bp1	TB_06H-MOCK_06H	0.620138	0.0396975	0.721701	no
Q3UKC1	Tax1bp1	TB_04H-MOCK_00H	0.697476	0.0577412	0.444927	no
Q3UKC1	Tax1bp1	TB_02H-MOCK_00H	0.0481265	0.900969	0.999532	no
