# Supplementary material for: Dynamic post-translational modification profiling of Mycobacterium tuberculosis-infected primary macrophages
Source: eLife. 2020 Jan 17;9:e51461. doi: 10.7554/eLife.51461 (PMC7030789; doi:10.7554/eLife.51461)
Supplement: Supplementary file 4. [file elife-51461-supp4.xlsx]

## Sheet: 24h
Protein	Gene	Entry.name	Comparison	log2FC	pvalue	adj.pvalue	imputed	iLog2FC	iPvalue	Protein.names
A0A0B4J1G0	A0A0B4J1G0		TB_24H-MOCK_24H	2.91607	6.10822e-10	4.14823e-08	no	2.91607	4.14823e-08
P58742	Aaas	AAAS_MOUSE	TB_24H-MOCK_24H	-1.08092	0.160318	0.414923	no	-1.08092	0.414923	Aladin (Adracalin)
Q9D2R0	Aacs	AACS_MOUSE	TB_24H-MOCK_24H	-0.445971	9.85997e-05	0.00149678	no	-0.445971	0.00149678	Acetoacetyl-CoA synthetase (EC 6.2.1.16)
Q8R2R3	Aagab	AAGAB_MOUSE	TB_24H-MOCK_24H	0.166962	0.602768	0.81756	no	0.166962	0.81756	Alpha- and gamma-adaptin-binding protein p34
Q3UHJ0	Aak1	AAK1_MOUSE	TB_24H-MOCK_24H	0.0744361	0.605546	0.81865	no	0.0744361	0.81865	AP2-associated protein kinase 1 (EC 2.7.11.1) (Adaptor-associated kinase 1)
Q8BGQ7	Aars	SYAC_MOUSE	TB_24H-MOCK_24H	0.0690073	0.547671	0.786936	no	0.0690073	0.786936	Alanine--tRNA ligase, cytoplasmic (EC 6.1.1.7) (Alanyl-tRNA synthetase) (AlaRS)
Q3THG9	Aarsd1	AASD1_MOUSE	TB_24H-MOCK_24H	-0.915936	0.0296509	0.134051	no	-0.915936	0.134051	Alanyl-tRNA editing protein Aarsd1 (Alanyl-tRNA deacylase alaX) (AlaX) (AlaXp-II) (Alanyl-tRNA synthetase domain-containing protein 1)
P41233	Abca1	ABCA1_MOUSE	TB_24H-MOCK_24H	0.74307	0.0232585	0.113535	no	0.74307	0.113535	ATP-binding cassette sub-family A member 1 (ATP-binding cassette transporter 1) (ABC-1) (ATP-binding cassette 1)
P06795	Abcb1b	MDR1B_MOUSE	TB_24H-MOCK_24H	-0.397625	0.00344802	0.0270188	no	-0.397625	0.0270188	Multidrug resistance protein 1B (EC 3.6.3.44) (ATP-binding cassette sub-family B member 1B) (P-glycoprotein 1) (CD antigen CD243)
Q9DC29	Abcb6	ABCB6_MOUSE	TB_24H-MOCK_24H	-0.178806	0.578063	0.803523	no	-0.178806	0.803523	ATP-binding cassette sub-family B member 6, mitochondrial
Q61102	Abcb7	ABCB7_MOUSE	TB_24H-MOCK_24H	-0.377208	0.312675	0.599043	no	-0.377208	0.599043	ATP-binding cassette sub-family B member 7, mitochondrial (ATP-binding cassette transporter 7) (ABC transporter 7 protein)
O35379	Abcc1	MRP1_MOUSE	TB_24H-MOCK_24H	-0.188049	0.528784	0.777063	no	-0.188049	0.777063	Multidrug resistance-associated protein 1 (ATP-binding cassette sub-family C member 1) (Leukotriene C(4) transporter) (LTC4 transporter)
B2RX12	Abcc3	MRP3_MOUSE	TB_24H-MOCK_24H	-0.921814	0.00233509	0.0200424	no	-0.921814	0.0200424	Canalicular multispecific organic anion transporter 2 (ATP-binding cassette sub-family C member 3) (Multidrug resistance-associated protein 3)
P48410	Abcd1	ABCD1_MOUSE	TB_24H-MOCK_24H	-0.393922	0.227578	0.503648	no	-0.393922	0.503648	ATP-binding cassette sub-family D member 1 (Adrenoleukodystrophy protein) (ALDP)
P55096	Abcd3	ABCD3_MOUSE	TB_24H-MOCK_24H	0.474264	0.251361	0.533746	no	0.474264	0.533746	ATP-binding cassette sub-family D member 3 (68 kDa peroxisomal membrane protein) (PMP68) (70 kDa peroxisomal membrane protein) (PMP70)
P61222	Abce1	ABCE1_MOUSE	TB_24H-MOCK_24H	-0.605019	0.0065888	0.0439514	no	-0.605019	0.0439514	ATP-binding cassette sub-family E member 1 (RNase L inhibitor) (Ribonuclease 4 inhibitor) (RNS4I)
Q6P542	Abcf1	ABCF1_MOUSE	TB_24H-MOCK_24H	-0.0792262	0.687687	0.860492	no	-0.0792262	0.860492	ATP-binding cassette sub-family F member 1
Q99LE6	Abcf2	ABCF2_MOUSE	TB_24H-MOCK_24H	-0.385681	0.0182849	0.0949426	no	-0.385681	0.0949426	ATP-binding cassette sub-family F member 2
Q8K268	Abcf3	ABCF3_MOUSE	TB_24H-MOCK_24H	-0.461146	0.0599936	0.218013	no	-0.461146	0.218013	ATP-binding cassette sub-family F member 3
Q99LR1	Abhd12	ABD12_MOUSE	TB_24H-MOCK_24H	-0.355358	0.00866649	0.0549029	no	-0.355358	0.0549029	Monoacylglycerol lipase ABHD12 (EC 3.1.1.23) (2-arachidonoylglycerol hydrolase) (Abhydrolase domain-containing protein 12)
Q8VCR7	Abhd14b	ABHEB_MOUSE	TB_24H-MOCK_24H	-0.275681	0.0840512	0.273643	no	-0.275681	0.273643	Protein ABHD14B (EC 3.-.-.-) (Alpha/beta hydrolase domain-containing protein 14B) (Abhydrolase domain-containing protein 14B) (CCG1-interacting factor B)
Q7M759	Abhd17b	AB17B_MOUSE	TB_24H-MOCK_24H	-0.0572556	0.832138	0.92991	no	-0.0572556	0.92991	Protein ABHD17B (EC 3.-.-.-) (Alpha/beta hydrolase domain-containing protein 17B) (Abhydrolase domain-containing protein 17B)
Q8CBW3	Abi1	ABI1_MOUSE	TB_24H-MOCK_24H	-0.267798	0.186088	0.452577	no	-0.267798	0.452577	Abl interactor 1 (Abelson interactor 1) (Abi-1) (Ablphilin-1) (Eps8 SH3 domain-binding protein) (Eps8-binding protein) (Spectrin SH3 domain-binding protein 1) (e3B1)
Q8BYZ1	Abi3	ABI3_MOUSE	TB_24H-MOCK_24H	0.0499178	0.870547	0.945978	no	0.0499178	0.945978	ABI gene family member 3 (New molecule including SH3) (Nesh)
P00520	Abl1	ABL1_MOUSE	TB_24H-MOCK_24H	-0.123796	0.712274	0.873642	no	-0.123796	0.873642	Tyrosine-protein kinase ABL1 (EC 2.7.10.2) (Abelson murine leukemia viral oncogene homolog 1) (Abelson tyrosine-protein kinase 1) (Proto-oncogene c-Abl) (p150)
Q5SSL4	Abr	ABR_MOUSE	TB_24H-MOCK_24H	0.245436	0.0247589	0.119058	no	0.245436	0.119058	Active breakpoint cluster region-related protein
Q4KML4	Abracl	ABRAL_MOUSE	TB_24H-MOCK_24H	-0.20393	0.467469	0.740111	no	-0.20393	0.740111	Costars family protein ABRACL (ABRA C-terminal-like protein)
Q921H8	Acaa1a	THIKA_MOUSE	TB_24H-MOCK_24H	0.529503	0.0105095	0.0638654	no	0.529503	0.0638654	3-ketoacyl-CoA thiolase A, peroxisomal (EC 2.3.1.16) (Acetyl-CoA acyltransferase A) (Beta-ketothiolase A) (Peroxisomal 3-oxoacyl-CoA thiolase A)
Q8BWT1	Acaa2	THIM_MOUSE	TB_24H-MOCK_24H	0.0136223	0.896249	0.955225	no	0.0136223	0.955225	3-ketoacyl-CoA thiolase, mitochondrial (EC 2.3.1.16) (Acetyl-CoA acyltransferase) (Beta-ketothiolase) (Mitochondrial 3-oxoacyl-CoA thiolase)
Q5SWU9	Acaca	ACACA_MOUSE	TB_24H-MOCK_24H	-0.34582	0.378649	0.664439	no	-0.34582	0.664439	Acetyl-CoA carboxylase 1 (ACC1) (EC 6.4.1.2) (ACC-alpha) (Acetyl-CoA carboxylase 265) [Includes: Biotin carboxylase (EC 6.3.4.14)]
Q9D7B6	Acad8	ACAD8_MOUSE	TB_24H-MOCK_24H	-0.268661	0.117798	0.346239	no	-0.268661	0.346239	Isobutyryl-CoA dehydrogenase, mitochondrial (EC 1.3.99.-) (Acyl-CoA dehydrogenase family member 8) (ACAD-8)
Q8JZN5	Acad9	ACAD9_MOUSE	TB_24H-MOCK_24H	0.102168	0.71209	0.873642	no	0.102168	0.873642	Acyl-CoA dehydrogenase family member 9, mitochondrial (ACAD-9) (EC 1.3.99.-)
P51174	Acadl	ACADL_MOUSE	TB_24H-MOCK_24H	0.300329	0.00229444	0.0198254	no	0.300329	0.0198254	Long-chain specific acyl-CoA dehydrogenase, mitochondrial (LCAD) (EC 1.3.8.8)
P45952	Acadm	ACADM_MOUSE	TB_24H-MOCK_24H	-0.199626	0.021614	0.107681	no	-0.199626	0.107681	Medium-chain specific acyl-CoA dehydrogenase, mitochondrial (MCAD) (EC 1.3.8.7)
Q07417	Acads	ACADS_MOUSE	TB_24H-MOCK_24H	0.0658491	0.655209	0.84364	no	0.0658491	0.84364	Short-chain specific acyl-CoA dehydrogenase, mitochondrial (SCAD) (EC 1.3.8.1) (Butyryl-CoA dehydrogenase)
Q9DBL1	Acadsb	ACDSB_MOUSE	TB_24H-MOCK_24H	0.125976	0.440524	0.719218	no	0.125976	0.719218	Short/branched chain specific acyl-CoA dehydrogenase, mitochondrial (SBCAD) (EC 1.3.8.5) (2-methyl branched chain acyl-CoA dehydrogenase) (2-MEBCAD) (2-methylbutyryl-coenzyme A dehydrogenase) (2-methylbutyryl-CoA dehydrogenase)
P50544	Acadvl	ACADV_MOUSE	TB_24H-MOCK_24H	-0.43956	0.00420009	0.0310278	no	-0.43956	0.0310278	Very long-chain specific acyl-CoA dehydrogenase, mitochondrial (EC 1.3.8.9) (MVLCAD) (VLCAD)
Q6ZQK5	Acap2	ACAP2_MOUSE	TB_24H-MOCK_24H	-0.230776	0.132831	0.372062	no	-0.230776	0.372062	Arf-GAP with coiled-coil, ANK repeat and PH domain-containing protein 2 (Centaurin-beta-2) (Cnt-b2)
Q8QZT1	Acat1	THIL_MOUSE	TB_24H-MOCK_24H	-0.0399512	0.841299	0.934064	no	-0.0399512	0.934064	Acetyl-CoA acetyltransferase, mitochondrial (EC 2.3.1.9) (Acetoacetyl-CoA thiolase)
Q8CAY6	Acat2	THIC_MOUSE	TB_24H-MOCK_24H	-0.359772	0.00207864	0.0183708	no	-0.359772	0.0183708	Acetyl-CoA acetyltransferase, cytosolic (EC 2.3.1.9) (Cytosolic acetoacetyl-CoA thiolase)
Q8BMP6	Acbd3	GCP60_MOUSE	TB_24H-MOCK_24H	-0.02322	0.905643	0.959426	no	-0.02322	0.959426	Golgi resident protein GCP60 (Acyl-CoA-binding domain-containing protein 3) (Golgi complex-associated protein 1) (GOCAP1) (Golgi phosphoprotein 1) (GOLPH1) (PBR- and PKA-associated protein 7) (Peripheral benzodiazepine receptor-associated protein PAP7)
Q5XG73	Acbd5	ACBD5_MOUSE	TB_24H-MOCK_24H	-0.321798	0.0886716	0.281581	no	-0.321798	0.281581	Acyl-CoA-binding domain-containing protein 5
Q9JIX8	Acin1	ACINU_MOUSE	TB_24H-MOCK_24H	-0.0362011	0.848936	0.938388	no	-0.0362011	0.938388	Apoptotic chromatin condensation inducer in the nucleus (Acinus)
Q91V92	Acly	ACLY_MOUSE	TB_24H-MOCK_24H	-0.285074	0.0287856	0.131578	no	-0.285074	0.131578	ATP-citrate synthase (EC 2.3.3.8) (ATP-citrate (pro-S-)-lyase) (Citrate cleavage enzyme)
P28271	Aco1	ACOC_MOUSE	TB_24H-MOCK_24H	-0.257184	0.0211373	0.106125	no	-0.257184	0.106125	Cytoplasmic aconitate hydratase (Aconitase) (EC 4.2.1.3) (Citrate hydro-lyase) (Iron regulatory protein 1) (IRP1) (Iron-responsive element-binding protein 1) (IRE-BP 1)
Q99KI0	Aco2	ACON_MOUSE	TB_24H-MOCK_24H	-0.018466	0.776379	0.906157	no	-0.018466	0.906157	Aconitate hydratase, mitochondrial (Aconitase) (EC 4.2.1.3) (Citrate hydro-lyase)
P54987	Acod1	IRG1_MOUSE	TB_24H-MOCK_24H	6.35349	0	0	no	6.35349	0	Cis-aconitate decarboxylase (CAD) (EC 4.1.1.6) (Aconitate decarboxylase) (Aconitate decarboxylase 1) (Cis-aconitic acid decarboxylase) (Immune-responsive gene 1 protein)
Q8VHQ9	Acot11	ACO11_MOUSE	TB_24H-MOCK_24H	-0.508213	0.191214	0.4582	no	-0.508213	0.4582	Acyl-coenzyme A thioesterase 11 (Acyl-CoA thioesterase 11) (EC 3.1.2.-) (Acyl-CoA thioester hydrolase 11) (Adipose-associated thioesterase) (Brown fat-inducible thioesterase) (BFIT)
Q9CQR4	Acot13	ACO13_MOUSE	TB_24H-MOCK_24H	-0.578571	0.000166861	0.00231512	no	-0.578571	0.00231512	Acyl-coenzyme A thioesterase 13 (Acyl-CoA thioesterase 13) (EC 3.1.2.-) (Thioesterase superfamily member 2) [Cleaved into: Acyl-coenzyme A thioesterase 13, N-terminally processed]
Q9QYR9	Acot2	ACOT2_MOUSE	TB_24H-MOCK_24H	-0.133076	0.516612	0.772261	no	-0.133076	0.772261	Acyl-coenzyme A thioesterase 2, mitochondrial (Acyl-CoA thioesterase 2) (EC 3.1.2.2) (Acyl coenzyme A thioester hydrolase) (MTE-I) (Very-long-chain acyl-CoA thioesterase)
Q91V12	Acot7	BACH_MOUSE	TB_24H-MOCK_24H	-0.0635984	0.855051	0.941532	no	-0.0635984	0.941532	Cytosolic acyl coenzyme A thioester hydrolase (EC 3.1.2.2) (Acyl-CoA thioesterase 7) (Brain acyl-CoA hydrolase) (BACH) (CTE-IIa) (CTE-II) (Long chain acyl-CoA thioester hydrolase)
P58137	Acot8	ACOT8_MOUSE	TB_24H-MOCK_24H	0.306223	0.316775	0.603157	no	0.306223	0.603157	Acyl-coenzyme A thioesterase 8 (Acyl-CoA thioesterase 8) (EC 3.1.2.27) (Choloyl-coenzyme A thioesterase) (Peroxisomal acyl-CoA thioesterase 2) (PTE-2) (Peroxisomal acyl-coenzyme A thioester hydrolase 1) (PTE-1) (Peroxisomal long-chain acyl-CoA thioesterase 1)
Q9R0X4	Acot9	ACOT9_MOUSE	TB_24H-MOCK_24H	0.39695	0.213497	0.483302	no	0.39695	0.483302	Acyl-coenzyme A thioesterase 9, mitochondrial (Acyl-CoA thioesterase 9) (EC 3.1.2.-) (Acyl coenzyme A thioester hydrolase 2) (MTE-2) (Acyl-CoA thioester hydrolase 9) (Mitochondrial 48 kDa acyl-CoA thioester hydrolase 1) (Mt-ACT48.1) (Protein U8) (p48)
Q9EPL9	Acox3	ACOX3_MOUSE	TB_24H-MOCK_24H	0.380497	0.255928	0.539008	no	0.380497	0.539008	Peroxisomal acyl-coenzyme A oxidase 3 (EC 1.3.3.6) (Branched-chain acyl-CoA oxidase) (BRCACox) (Pristanoyl-CoA oxidase)
Q9D358	Acp1	PPAC_MOUSE	TB_24H-MOCK_24H	0.157467	0.756609	0.896103	no	0.157467	0.896103	Low molecular weight phosphotyrosine protein phosphatase (LMW-PTP) (LMW-PTPase) (EC 3.1.3.48) (Low molecular weight cytosolic acid phosphatase) (EC 3.1.3.2)
P24638	Acp2	PPAL_MOUSE	TB_24H-MOCK_24H	1.0456	1.30251e-05	0.000262605	no	1.0456	0.000262605	Lysosomal acid phosphatase (LAP) (EC 3.1.3.2)
Q8BP40	Acp6	PPA6_MOUSE	TB_24H-MOCK_24H	-0.598456	0.028488	0.130852	no	-0.598456	0.130852	Lysophosphatidic acid phosphatase type 6 (EC 3.1.3.2) (Acid phosphatase 6, lysophosphatidic) (Acid phosphatase-like protein 1) (PACPL1)
Q8VCW8	Acsf2	ACSF2_MOUSE	TB_24H-MOCK_24H	-0.0581071	0.763973	0.90062	no	-0.0581071	0.90062	Acyl-CoA synthetase family member 2, mitochondrial (EC 6.2.1.-)
P41216	Acsl1	ACSL1_MOUSE	TB_24H-MOCK_24H	2.00982	7.18376e-11	5.91667e-09	no	2.00982	5.91667e-09	Long-chain-fatty-acid--CoA ligase 1 (EC 6.2.1.3) (Long-chain acyl-CoA synthetase 1) (LACS 1)
Q9CZW4	Acsl3	ACSL3_MOUSE	TB_24H-MOCK_24H	-0.231267	0.272085	0.556682	no	-0.231267	0.556682	Long-chain-fatty-acid--CoA ligase 3 (EC 6.2.1.3) (Long-chain acyl-CoA synthetase 3) (LACS 3)
Q9QUJ7	Acsl4	ACSL4_MOUSE	TB_24H-MOCK_24H	0.214436	0.188125	0.45486	no	0.214436	0.45486	Long-chain-fatty-acid--CoA ligase 4 (EC 6.2.1.3) (Long-chain acyl-CoA synthetase 4) (LACS 4) (mACS4)
Q8JZR0	Acsl5	ACSL5_MOUSE	TB_24H-MOCK_24H	-0.177555	0.343234	0.630294	no	-0.177555	0.630294	Long-chain-fatty-acid--CoA ligase 5 (EC 6.2.1.3) (Long-chain acyl-CoA synthetase 5) (LACS 5)
Q99NB1	Acss1	ACS2L_MOUSE	TB_24H-MOCK_24H	-0.346945	0.370711	0.65751	no	-0.346945	0.65751	Acetyl-coenzyme A synthetase 2-like, mitochondrial (EC 6.2.1.1) (Acetate--CoA ligase 2) (Acetyl-CoA synthetase 2) (AceCS2) (Acyl-CoA synthetase short-chain family member 1)
P60710	Actb	ACTB_MOUSE	TB_24H-MOCK_24H	0.480469	0.338327	0.626005	no	0.480469	0.626005	Actin, cytoplasmic 1 (Beta-actin) [Cleaved into: Actin, cytoplasmic 1, N-terminally processed]
Q8BFZ3	Actbl2	ACTBL_MOUSE	TB_24H-MOCK_24H	1.20477	0.724589	0.88011	no	1.20477	0.88011	Beta-actin-like protein 2 (Kappa-actin)
P63260	Actg1	ACTG_MOUSE	TB_24H-MOCK_24H	0.0405001	0.897447	0.955976	no	0.0405001	0.955976	Actin, cytoplasmic 2 (Gamma-actin) [Cleaved into: Actin, cytoplasmic 2, N-terminally processed]
Q9Z2N8	Actl6a	ACL6A_MOUSE	TB_24H-MOCK_24H	-0.377154	0.0336204	0.145739	no	-0.377154	0.145739	Actin-like protein 6A (53 kDa BRG1-associated factor A) (Actin-related protein Baf53a) (BRG1-associated factor 53A) (BAF53A)
Q7TPR4	Actn1	ACTN1_MOUSE	TB_24H-MOCK_24H	-0.436985	0.017929	0.0935355	no	-0.436985	0.0935355	Alpha-actinin-1 (Alpha-actinin cytoskeletal isoform) (F-actin cross-linking protein) (Non-muscle alpha-actinin-1)
P57780	Actn4	ACTN4_MOUSE	TB_24H-MOCK_24H	-0.175663	0.317617	0.60336	no	-0.175663	0.60336	Alpha-actinin-4 (Non-muscle alpha-actinin 4)
Q9QZB7	Actr10	ARP10_MOUSE	TB_24H-MOCK_24H	0.00903275	0.940442	0.976607	no	0.00903275	0.976607	Actin-related protein 10 (Actin-related protein 11)
P61164	Actr1a	ACTZ_MOUSE	TB_24H-MOCK_24H	-0.0375893	0.818001	0.924048	no	-0.0375893	0.924048	Alpha-centractin (Centractin) (ARP1) (Actin-RPV) (Centrosome-associated actin homolog)
Q8R5C5	Actr1b	ACTY_MOUSE	TB_24H-MOCK_24H	0.00452094	0.979725	0.992839	no	0.00452094	0.992839	Beta-centractin (Actin-related protein 1B) (ARP1B)
P61161	Actr2	ARP2_MOUSE	TB_24H-MOCK_24H	0.087431	0.285299	0.568063	no	0.087431	0.568063	Actin-related protein 2 (Actin-like protein 2)
Q99JY9	Actr3	ARP3_MOUSE	TB_24H-MOCK_24H	0.0301971	0.738524	0.886183	no	0.0301971	0.886183	Actin-related protein 3 (Actin-like protein 3)
Q8R2S9	Actr8	ARP8_MOUSE	TB_24H-MOCK_24H	-0.507373	0.119793	0.349066	no	-0.507373	0.349066	Actin-related protein 8
P03958	Ada	ADA_MOUSE	TB_24H-MOCK_24H	0.382314	0.36611	0.654191	no	0.382314	0.654191	Adenosine deaminase (EC 3.5.4.4) (Adenosine aminohydrolase)
Q9D5P4	Adad2	ADAD2_MOUSE	TB_24H-MOCK_24H	0.92753	0.0325987	0.142106	no	0.92753	0.142106	Adenosine deaminase domain-containing protein 2
O35598	Adam10	ADA10_MOUSE	TB_24H-MOCK_24H	-1.29752	0.000157624	0.00221074	no	-1.29752	0.00221074	Disintegrin and metalloproteinase domain-containing protein 10 (ADAM 10) (EC 3.4.24.81) (Kuzbanian protein homolog) (Mammalian disintegrin-metalloprotease) (CD antigen CD156c)
O88839	Adam15	ADA15_MOUSE	TB_24H-MOCK_24H	-1.42784	1.87667e-08	8.75252e-07	no	-1.42784	8.75252e-07	Disintegrin and metalloproteinase domain-containing protein 15 (ADAM 15) (EC 3.4.24.-) (AD56) (Metalloprotease RGD disintegrin protein) (Metalloproteinase-like, disintegrin-like, and cysteine-rich protein 15) (MDC-15) (Metargidin)
Q9Z0F8	Adam17	ADA17_MOUSE	TB_24H-MOCK_24H	0.295722	0.0308895	0.138395	no	0.295722	0.138395	Disintegrin and metalloproteinase domain-containing protein 17 (ADAM 17) (EC 3.4.24.86) (TNF-alpha convertase) (TNF-alpha-converting enzyme) (CD antigen CD156b)
Q05910	Adam8	ADAM8_MOUSE	TB_24H-MOCK_24H	-0.454352	0.0519171	0.196864	no	-0.454352	0.196864	Disintegrin and metalloproteinase domain-containing protein 8 (ADAM 8) (EC 3.4.24.-) (Cell surface antigen MS2) (Macrophage cysteine-rich glycoprotein) (CD antigen CD156a)
Q61072	Adam9	ADAM9_MOUSE	TB_24H-MOCK_24H	0.388935	0.136541	0.379434	no	0.388935	0.379434	Disintegrin and metalloproteinase domain-containing protein 9 (ADAM 9) (EC 3.4.24.-) (Meltrin-gamma) (Metalloprotease/disintegrin/cysteine-rich protein 9) (Myeloma cell metalloproteinase)
Q8R2V5	Adap2	ADAP2_MOUSE	TB_24H-MOCK_24H	1.18377	0.000375572	0.00449175	no	1.18377	0.00449175	Arf-GAP with dual PH domain-containing protein 2 (Centaurin-alpha-2) (Cnt-a2)
Q99MU3	Adar	DSRAD_MOUSE	TB_24H-MOCK_24H	1.1975	1.72451e-05	0.000340591	no	1.1975	0.000340591	Double-stranded RNA-specific adenosine deaminase (DRADA) (EC 3.5.4.37) (RNA adenosine deaminase 1)
Q9QYC0	Add1	ADDA_MOUSE	TB_24H-MOCK_24H	-0.956236	0.00188215	0.0169437	no	-0.956236	0.0169437	Alpha-adducin (Erythrocyte adducin subunit alpha)
Q9QYB5	Add3	ADDG_MOUSE	TB_24H-MOCK_24H	-1.74685	0.000107768	0.00159921	no	-1.74685	0.00159921	Gamma-adducin (Adducin-like protein 70)
Q61549	Adgre1	AGRE1_MOUSE	TB_24H-MOCK_24H	-0.133592	0.559483	0.793721	no	-0.133592	0.793721	Adhesion G protein-coupled receptor E1 (Cell surface glycoprotein F4/80) (EGF-like module receptor 1) (EGF-like module-containing mucin-like hormone receptor-like 1) (EMR1 hormone receptor)
P28474	Adh5	ADHX_MOUSE	TB_24H-MOCK_24H	-0.125567	0.441603	0.720373	no	-0.125567	0.720373	Alcohol dehydrogenase class-3 (EC 1.1.1.1) (Alcohol dehydrogenase 2) (Alcohol dehydrogenase 5) (Alcohol dehydrogenase B2) (ADH-B2) (Alcohol dehydrogenase class-III) (Glutathione-dependent formaldehyde dehydrogenase) (FALDH) (FDH) (GSH-FDH) (EC 1.1.1.-) (S-(hydroxymethyl)glutathione dehydrogenase) (EC 1.1.1.284)
P55264	Adk	ADK_MOUSE	TB_24H-MOCK_24H	-0.128383	0.205804	0.474773	no	-0.128383	0.474773	Adenosine kinase (AK) (EC 2.7.1.20) (Adenosine 5'-phosphotransferase)
Q9Z103	Adnp	ADNP_MOUSE	TB_24H-MOCK_24H	-0.219906	0.648129	0.840067	no	-0.219906	0.840067	Activity-dependent neuroprotector homeobox protein (Activity-dependent neuroprotective protein)
Q6PDY2	Ado	AEDO_MOUSE	TB_24H-MOCK_24H	-0.612208	0.228744	0.504703	no	-0.612208	0.504703	2-aminoethanethiol dioxygenase (EC 1.13.11.19) (Cysteamine dioxygenase)
Q8VDL4	Adpgk	ADPGK_MOUSE	TB_24H-MOCK_24H	-0.650148	0.00327784	0.0260545	no	-0.650148	0.0260545	ADP-dependent glucokinase (ADP-GK) (ADPGK) (EC 2.7.1.147)
P54923	Adprh	ADPRH_MOUSE	TB_24H-MOCK_24H	0.0743631	0.756878	0.896103	no	0.0743631	0.896103	[Protein ADP-ribosylarginine] hydrolase (ADP-ribosylarginine hydrolase) (EC 3.2.2.19) (ADP-ribose-L-arginine cleaving enzyme)
Q8CG72	Adprhl2	ARHL2_MOUSE	TB_24H-MOCK_24H	-0.354046	0.0106263	0.0644498	no	-0.354046	0.0644498	Poly(ADP-ribose) glycohydrolase ARH3 (EC 3.2.1.143) (ADP-ribosylhydrolase 3) ([Protein ADP-ribosylarginine] hydrolase-like protein 2)
Q9JKV1	Adrm1	ADRM1_MOUSE	TB_24H-MOCK_24H	0.136382	0.668305	0.849871	no	0.136382	0.849871	Proteasomal ubiquitin receptor ADRM1 (110 kDa cell membrane glycoprotein) (Gp110) (Adhesion-regulating molecule 1) (ARM-1) (Rpn13 homolog)
P54822	Adsl	PUR8_MOUSE	TB_24H-MOCK_24H	-0.340927	0.0141925	0.078504	no	-0.340927	0.078504	Adenylosuccinate lyase (ASL) (EC 4.3.2.2) (Adenylosuccinase) (ASase)
P46664	Adss	PURA2_MOUSE	TB_24H-MOCK_24H	-0.482507	0.00650417	0.0437474	no	-0.482507	0.0437474	Adenylosuccinate synthetase isozyme 2 (AMPSase 2) (AdSS 2) (EC 6.3.4.4) (Adenylosuccinate synthetase, acidic isozyme) (Adenylosuccinate synthetase, liver isozyme) (L-type adenylosuccinate synthetase) (IMP--aspartate ligase 2)
P28650	Adssl1	PURA1_MOUSE	TB_24H-MOCK_24H	-0.282695	0.284935	0.568063	no	-0.282695	0.568063	Adenylosuccinate synthetase isozyme 1 (AMPSase 1) (AdSS 1) (EC 6.3.4.4) (Adenylosuccinate synthetase, basic isozyme) (Adenylosuccinate synthetase, muscle isozyme) (M-type adenylosuccinate synthetase) (IMP--aspartate ligase 1)
P63002	Aes	AES_MOUSE	TB_24H-MOCK_24H	-0.399414	0.548278	0.787234	no	-0.399414	0.787234	Amino-terminal enhancer of split (Amino enhancer of split) (Grg-5) (Groucho-related protein 5) (Protein ESP1) (Protein GRG)
Q9QZQ1	Afdn	AFAD_MOUSE	TB_24H-MOCK_24H	-0.128117	0.622997	0.829786	no	-0.128117	0.829786	Afadin (Afadin adherens junction formation factor) (Protein Af-6)
Q8JZQ2	Afg3l2	AFG32_MOUSE	TB_24H-MOCK_24H	-0.0209863	0.883968	0.949907	no	-0.0209863	0.949907	AFG3-like protein 2 (EC 3.4.24.-)
Q80WT5	Aftph	AFTIN_MOUSE	TB_24H-MOCK_24H	0.0843414	0.823968	0.926934	no	0.0843414	0.926934	Aftiphilin
Q8VHH5	Agap3	AGAP3_MOUSE	TB_24H-MOCK_24H	-0.48099	0.0228725	0.11236	no	-0.48099	0.11236	Arf-GAP with GTPase, ANK repeat and PH domain-containing protein 3 (AGAP-3) (CRAM-associated GTPase) (CRAG) (Centaurin-gamma-3) (Cnt-g3) (MR1-interacting protein) (MRIP-1)
Q8K2K6	Agfg1	AGFG1_MOUSE	TB_24H-MOCK_24H	0.234212	0.421942	0.702209	no	0.234212	0.702209	Arf-GAP domain and FG repeat-containing protein 1 (HIV-1 Rev-binding protein homolog) (Nucleoporin-like protein RIP)
Q80WC7	Agfg2	AGFG2_MOUSE	TB_24H-MOCK_24H	-0.253481	0.451022	0.727898	no	-0.253481	0.727898	Arf-GAP domain and FG repeat-containing protein 2 (HIV-1 Rev-binding protein-like protein) (Rev/Rex activation domain-binding protein related) (RAB-R)
Q9ESW4	Agk	AGK_MOUSE	TB_24H-MOCK_24H	0.000840124	0.996561	0.998923	no	0.000840124	0.998923	Acylglycerol kinase, mitochondrial (EC 2.7.1.107) (EC 2.7.1.94) (Multiple substrate lipid kinase) (MuLK) (Multi-substrate lipid kinase)
Q8CJG0	Ago2	AGO2_MOUSE	TB_24H-MOCK_24H	-0.0370165	0.88871	0.951495	no	-0.0370165	0.951495	Protein argonaute-2 (Argonaute2) (mAgo2) (EC 3.1.26.n2) (Argonaute RISC catalytic component 2) (Eukaryotic translation initiation factor 2C 2) (eIF-2C 2) (eIF2C 2) (Piwi/argonaute family protein meIF2C2) (Protein slicer)
Q9D1E8	Agpat5	PLCE_MOUSE	TB_24H-MOCK_24H	-0.030358	0.899103	0.956687	no	-0.030358	0.956687	1-acyl-sn-glycerol-3-phosphate acyltransferase epsilon (EC 2.3.1.51) (1-acylglycerol-3-phosphate O-acyltransferase 5) (1-AGP acyltransferase 5) (1-AGPAT 5) (Lysophosphatidic acid acyltransferase epsilon) (LPAAT-epsilon)
Q8C0I1	Agps	ADAS_MOUSE	TB_24H-MOCK_24H	-0.0594889	0.878104	0.947627	no	-0.0594889	0.947627	Alkyldihydroxyacetonephosphate synthase, peroxisomal (Alkyl-DHAP synthase) (EC 2.5.1.26) (Alkylglycerone-phosphate synthase)
Q8CJF7	Ahctf1	ELYS_MOUSE	TB_24H-MOCK_24H	-0.661449	0.0899512	0.284246	no	-0.661449	0.284246	Protein ELYS (Embryonic large molecule derived from yolk sac) (Protein MEL-28) (Putative AT-hook-containing transcription factor 1)
P50247	Ahcy	SAHH_MOUSE	TB_24H-MOCK_24H	-0.298741	0.0129085	0.0735178	no	-0.298741	0.0735178	Adenosylhomocysteinase (AdoHcyase) (EC 3.3.1.1) (CUBP) (Liver copper-binding protein) (S-adenosyl-L-homocysteine hydrolase)
Q80SW1	Ahcyl1	SAHH2_MOUSE	TB_24H-MOCK_24H	0.0930648	0.71535	0.875749	no	0.0930648	0.875749	Putative adenosylhomocysteinase 2 (AdoHcyase 2) (EC 3.3.1.1) (IP3R-binding protein released with inositol 1,4,5-trisphosphate) (S-adenosyl-L-homocysteine hydrolase 2) (S-adenosylhomocysteine hydrolase-like protein 1)
Q68FL4	Ahcyl2	SAHH3_MOUSE	TB_24H-MOCK_24H	-0.0107576	0.950118	0.979474	no	-0.0107576	0.979474	Putative adenosylhomocysteinase 3 (AdoHcyase 3) (EC 3.3.1.1) (Long-IRBIT) (S-adenosyl-L-homocysteine hydrolase 3) (S-adenosylhomocysteine hydrolase-like protein 2)
Q8BK64	Ahsa1	AHSA1_MOUSE	TB_24H-MOCK_24H	-0.228335	0.252976	0.534828	no	-0.228335	0.534828	Activator of 90 kDa heat shock protein ATPase homolog 1 (AHA1)
Q8C4Q6	Aida	AIDA_MOUSE	TB_24H-MOCK_24H	0.427981	0.316672	0.603157	no	0.427981	0.603157	Axin interactor, dorsalization-associated protein (Axin interaction partner and dorsalization antagonist)
O70200	Aif1	AIF1_MOUSE	TB_24H-MOCK_24H	0.331137	0.403086	0.680779	no	0.331137	0.680779	Allograft inflammatory factor 1 (AIF-1) (Ionized calcium-binding adapter molecule 1)
Q9Z0X1	Aifm1	AIFM1_MOUSE	TB_24H-MOCK_24H	0.051395	0.653027	0.842838	no	0.051395	0.842838	Apoptosis-inducing factor 1, mitochondrial (EC 1.1.1.-) (Programmed cell death protein 8)
Q8BUE4	Aifm2	AIFM2_MOUSE	TB_24H-MOCK_24H	0.0872021	0.861022	0.944051	no	0.0872021	0.944051	Apoptosis-inducing factor 2 (EC 1.-.-.-) (Apoptosis-inducing factor homologous mitochondrion-associated inducer of death) (Apoptosis-inducing factor-like mitochondrion-associated inducer of death)
Q91VJ1	Aim2	AIM2_MOUSE	TB_24H-MOCK_24H	0.410909	0.121402	0.352549	no	0.410909	0.352549	Interferon-inducible protein AIM2 (Interferon-inducible protein 210) (Ifi-210) (Interferon-inducible protein p210)
P31230	Aimp1	AIMP1_MOUSE	TB_24H-MOCK_24H	-0.109931	0.380348	0.665008	no	-0.109931	0.665008	Aminoacyl tRNA synthase complex-interacting multifunctional protein 1 (Multisynthase complex auxiliary component p43) [Cleaved into: Endothelial monocyte-activating polypeptide 2 (EMAP-2) (Endothelial monocyte-activating polypeptide II) (EMAP-II) (Small inducible cytokine subfamily E member 1)]
Q8R010	Aimp2	AIMP2_MOUSE	TB_24H-MOCK_24H	-0.415561	0.0807707	0.265644	no	-0.415561	0.265644	Aminoacyl tRNA synthase complex-interacting multifunctional protein 2 (Multisynthase complex auxiliary component p38) (Protein JTV-1)
O08915	Aip	AIP_MOUSE	TB_24H-MOCK_24H	0.332916	0.432158	0.709941	no	0.332916	0.709941	AH receptor-interacting protein (AIP) (Aryl-hydrocarbon receptor-interacting protein)
Q9WTP6	Ak2	KAD2_MOUSE	TB_24H-MOCK_24H	0.157189	0.106366	0.322277	no	0.157189	0.322277	Adenylate kinase 2, mitochondrial (AK 2) (EC 2.7.4.3) (ATP-AMP transphosphorylase 2) (ATP:AMP phosphotransferase) (Adenylate monophosphate kinase) [Cleaved into: Adenylate kinase 2, mitochondrial, N-terminally processed]
Q9WTP7	Ak3	KAD3_MOUSE	TB_24H-MOCK_24H	-0.298914	0.226092	0.501549	no	-0.298914	0.501549	GTP:AMP phosphotransferase AK3, mitochondrial (EC 2.7.4.10) (Adenylate kinase 3) (AK 3) (Adenylate kinase 3 alpha-like 1)
Q9WUR9	Ak4	KAD4_MOUSE	TB_24H-MOCK_24H	1.11908	0.00119468	0.0116704	no	1.11908	0.0116704	Adenylate kinase 4, mitochondrial (AK 4) (EC 2.7.4.10) (EC 2.7.4.6) (Adenylate kinase 3-like) (Adenylate kinase isoenzyme 4) (GTP:AMP phosphotransferase AK4)
O88845	Akap10	AKA10_MOUSE	TB_24H-MOCK_24H	-0.156429	0.263041	0.546296	no	-0.156429	0.546296	A-kinase anchor protein 10, mitochondrial (AKAP-10) (Dual specificity A kinase-anchoring protein 2) (D-AKAP-2) (Protein kinase A-anchoring protein 10) (PRKA10)
E9Q394	Akap13	AKP13_MOUSE	TB_24H-MOCK_24H	0.716515	0.0251167	0.120241	no	0.716515	0.120241	A-kinase anchor protein 13 (AKAP-13) (AKAP-Lbc)
Q9DBR0	Akap8	AKAP8_MOUSE	TB_24H-MOCK_24H	-0.433648	0.0658815	0.231945	no	-0.433648	0.231945	A-kinase anchor protein 8 (AKAP-8) (A-kinase anchor protein 95 kDa) (AKAP 95)
Q70FJ1	Akap9	AKAP9_MOUSE	TB_24H-MOCK_24H	-0.540955	0.0136616	0.0762016	no	-0.540955	0.0762016	A-kinase anchor protein 9 (AKAP-9) (Protein kinase A-anchoring protein 9) (PRKA9)
Q9JII6	Akr1a1	AK1A1_MOUSE	TB_24H-MOCK_24H	0.205034	0.117367	0.34576	no	0.205034	0.34576	Alcohol dehydrogenase [NADP(+)] (EC 1.1.1.2) (Aldehyde reductase) (Aldo-keto reductase family 1 member A1)
P45376	Akr1b1	ALDR_MOUSE	TB_24H-MOCK_24H	-0.362586	0.00963136	0.0591793	no	-0.362586	0.0591793	Aldose reductase (AR) (EC 1.1.1.21) (Aldehyde reductase)
P21300	Akr1b7	ALD1_MOUSE	TB_24H-MOCK_24H	-0.240598	0.157691	0.411059	no	-0.240598	0.411059	Aldose reductase-related protein 1 (EC 1.1.1.21) (Aldehyde reductase) (AR) (Aldo-keto reductase family 1 member B7) (MVDP) (Vas deferens androgen-dependent protein)
P45377	Akr1b8	ALD2_MOUSE	TB_24H-MOCK_24H	-0.359481	1.88325e-05	0.000366334	no	-0.359481	0.000366334	Aldose reductase-related protein 2 (AR) (EC 1.1.1.21) (Aldehyde reductase) (Fibroblast growth factor-regulated protein) (Protein FR-1)
Q8VC28	Akr1c13	AK1CD_MOUSE	TB_24H-MOCK_24H	-0.0295582	0.823649	0.926844	no	-0.0295582	0.926844	Aldo-keto reductase family 1 member C13 (EC 1.1.1.-)
Q9DCT1	Akr1e2	AKCL2_MOUSE	TB_24H-MOCK_24H	-0.420664	0.142391	0.388806	no	-0.420664	0.388806	1,5-anhydro-D-fructose reductase (AF reductase) (EC 1.1.1.263) (Aldo-keto reductase family 1 member C-like protein 2) (Aldo-keto reductase family 1 member E1) (Aldo-keto reductase family 1 member E2)
Q8CG76	Akr7a2	ARK72_MOUSE	TB_24H-MOCK_24H	-0.359703	0.00112298	0.0110895	no	-0.359703	0.0110895	Aflatoxin B1 aldehyde reductase member 2 (EC 1.1.1.n11) (Succinic semialdehyde reductase) (SSA reductase)
P31750	Akt1	AKT1_MOUSE	TB_24H-MOCK_24H	-0.821464	0.00868008	0.0549029	no	-0.821464	0.0549029	RAC-alpha serine/threonine-protein kinase (EC 2.7.11.1) (AKT1 kinase) (Protein kinase B) (PKB) (Protein kinase B alpha) (PKB alpha) (Proto-oncogene c-Akt) (RAC-PK-alpha) (Thymoma viral proto-oncogene)
Q9D1F4	Akt1s1	AKTS1_MOUSE	TB_24H-MOCK_24H	-0.626094	0.148425	0.397614	no	-0.626094	0.397614	Proline-rich AKT1 substrate 1 (Proline-rich AKT substrate)
Q60823	Akt2	AKT2_MOUSE	TB_24H-MOCK_24H	-0.250874	0.304918	0.591647	no	-0.250874	0.591647	RAC-beta serine/threonine-protein kinase (EC 2.7.11.1) (Protein kinase Akt-2) (Protein kinase B beta) (PKB beta) (RAC-PK-beta)
P10518	Alad	HEM2_MOUSE	TB_24H-MOCK_24H	-0.552048	0.0613066	0.221172	no	-0.552048	0.221172	Delta-aminolevulinic acid dehydratase (ALADH) (EC 4.2.1.24) (Porphobilinogen synthase)
P07724	Alb	ALBU_MOUSE	TB_24H-MOCK_24H	0.830633	0.095842	0.297995	no	0.830633	0.297995	Serum albumin
Q61490	Alcam	CD166_MOUSE	TB_24H-MOCK_24H	-0.547579	0.00112217	0.0110895	no	-0.547579	0.0110895	CD166 antigen (Activated leukocyte cell adhesion molecule) (BEN) (Protein DM-GRASP) (CD antigen CD166)
Q571I9	Aldh16a1	A16A1_MOUSE	TB_24H-MOCK_24H	0.00625179	0.963527	0.986723	no	0.00625179	0.986723	Aldehyde dehydrogenase family 16 member A1
Q9Z110	Aldh18a1	P5CS_MOUSE	TB_24H-MOCK_24H	0.0118131	0.888229	0.951495	no	0.0118131	0.951495	Delta-1-pyrroline-5-carboxylate synthase (P5CS) (Aldehyde dehydrogenase family 18 member A1) [Includes: Glutamate 5-kinase (GK) (EC 2.7.2.11) (Gamma-glutamyl kinase); Gamma-glutamyl phosphate reductase (GPR) (EC 1.2.1.41) (Glutamate-5-semialdehyde dehydrogenase) (Glutamyl-gamma-semialdehyde dehydrogenase)]
Q9CZS1	Aldh1b1	AL1B1_MOUSE	TB_24H-MOCK_24H	1.95388	6.95326e-06	0.000153806	no	1.95388	0.000153806	Aldehyde dehydrogenase X, mitochondrial (EC 1.2.1.3) (Aldehyde dehydrogenase family 1 member B1)
Q8R0Y6	Aldh1l1	AL1L1_MOUSE	TB_24H-MOCK_24H	0.0513012	0.748447	0.891166	no	0.0513012	0.891166	Cytosolic 10-formyltetrahydrofolate dehydrogenase (10-FTHFDH) (FDH) (EC 1.5.1.6) (Aldehyde dehydrogenase family 1 member L1)
P47738	Aldh2	ALDH2_MOUSE	TB_24H-MOCK_24H	-0.0648433	0.432099	0.709941	no	-0.0648433	0.709941	Aldehyde dehydrogenase, mitochondrial (EC 1.2.1.3) (AHD-M1) (ALDH class 2) (ALDH-E2) (ALDHI)
P47740	Aldh3a2	AL3A2_MOUSE	TB_24H-MOCK_24H	0.0776873	0.701788	0.870023	no	0.0776873	0.870023	Fatty aldehyde dehydrogenase (EC 1.2.1.3) (Aldehyde dehydrogenase 3) (Aldehyde dehydrogenase family 3 member A2)
Q80VQ0	Aldh3b1	AL3B1_MOUSE	TB_24H-MOCK_24H	-0.305155	0.0663889	0.232993	no	-0.305155	0.232993	Aldehyde dehydrogenase family 3 member B1 (EC 1.2.1.5) (Aldehyde dehydrogenase 7)
Q8CHT0	Aldh4a1	AL4A1_MOUSE	TB_24H-MOCK_24H	0.0795476	0.710816	0.873322	no	0.0795476	0.873322	Delta-1-pyrroline-5-carboxylate dehydrogenase, mitochondrial (P5C dehydrogenase) (EC 1.2.1.88) (Aldehyde dehydrogenase family 4 member A1) (L-glutamate gamma-semialdehyde dehydrogenase)
Q9EQ20	Aldh6a1	MMSA_MOUSE	TB_24H-MOCK_24H	-0.0422171	0.895825	0.955225	no	-0.0422171	0.955225	Methylmalonate-semialdehyde dehydrogenase [acylating], mitochondrial (MMSDH) (Malonate-semialdehyde dehydrogenase [acylating]) (EC 1.2.1.18) (EC 1.2.1.27) (Aldehyde dehydrogenase family 6 member A1)
Q9DBF1	Aldh7a1	AL7A1_MOUSE	TB_24H-MOCK_24H	0.444956	0.209426	0.479046	no	0.444956	0.479046	Alpha-aminoadipic semialdehyde dehydrogenase (Alpha-AASA dehydrogenase) (EC 1.2.1.31) (Aldehyde dehydrogenase family 7 member A1) (EC 1.2.1.3) (Antiquitin-1) (Betaine aldehyde dehydrogenase) (EC 1.2.1.8) (Delta1-piperideine-6-carboxylate dehydrogenase) (P6c dehydrogenase)
Q9JLJ2	Aldh9a1	AL9A1_MOUSE	TB_24H-MOCK_24H	-0.249466	0.0190605	0.0982468	no	-0.249466	0.0982468	4-trimethylaminobutyraldehyde dehydrogenase (TMABADH) (EC 1.2.1.47) (Aldehyde dehydrogenase family 9 member A1) (EC 1.2.1.3)
P05064	Aldoa	ALDOA_MOUSE	TB_24H-MOCK_24H	-0.0402896	0.485838	0.7559	no	-0.0402896	0.7559	Fructose-bisphosphate aldolase A (EC 4.1.2.13) (Aldolase 1) (Muscle-type aldolase)
P05063	Aldoc	ALDOC_MOUSE	TB_24H-MOCK_24H	-0.218828	0.0626163	0.223811	no	-0.218828	0.223811	Fructose-bisphosphate aldolase C (EC 4.1.2.13) (Aldolase 3) (Brain-type aldolase) (Scrapie-responsive protein 2) (Zebrin II)
Q9DB25	Alg5	ALG5_MOUSE	TB_24H-MOCK_24H	0.201364	0.482875	0.752356	no	0.201364	0.752356	Dolichyl-phosphate beta-glucosyltransferase (DolP-glucosyltransferase) (EC 2.4.1.117) (Asparagine-linked glycosylation protein 5 homolog)
Q8VDI9	Alg9	ALG9_MOUSE	TB_24H-MOCK_24H	0.198367	0.782834	0.908687	no	0.198367	0.908687	Alpha-1,2-mannosyltransferase ALG9 (EC 2.4.1.259) (EC 2.4.1.261) (Asparagine-linked glycosylation protein 9 homolog) (Disrupted in bipolar disorder protein 1 homolog) (Dol-P-Man:Man(6)GlcNAc(2)-PP-Dol alpha-1,2-mannosyltransferase) (Dol-P-Man:Man(8)GlcNAc(2)-PP-Dol alpha-1,2-mannosyltransferase)
P30355	Alox5ap	AL5AP_MOUSE	TB_24H-MOCK_24H	-0.193684	0.222179	0.495994	no	-0.193684	0.495994	Arachidonate 5-lipoxygenase-activating protein (FLAP) (MK-886-binding protein)
Q8C8B0	Alx1	ALX1_MOUSE	TB_24H-MOCK_24H	0.164333	0.618291	0.826738	no	0.164333	0.826738	ALX homeobox protein 1 (Cartilage homeoprotein 1) (CART-1)
O08583	Alyref	THOC4_MOUSE	TB_24H-MOCK_24H	-0.750403	0.00082726	0.00851437	no	-0.750403	0.00851437	THO complex subunit 4 (Tho4) (Ally of AML-1 and LEF-1) (Aly/REF export factor) (REF1-I) (RNA and export factor-binding protein 1) (Transcriptional coactivator Aly/REF)
Q8JZV7	Amdhd2	NAGA_MOUSE	TB_24H-MOCK_24H	0.0368379	0.6786	0.854959	no	0.0368379	0.854959	N-acetylglucosamine-6-phosphate deacetylase (GlcNAc 6-P deacetylase) (EC 3.5.1.25) (Amidohydrolase domain-containing protein 2)
Q9R049	Amfr	AMFR_MOUSE	TB_24H-MOCK_24H	-0.47527	0.0616502	0.222022	no	-0.47527	0.222022	E3 ubiquitin-protein ligase AMFR (EC 2.3.2.27) (Autocrine motility factor receptor) (AMF receptor) (RING-type E3 ubiquitin transferase AMFR)
Q9DBT5	Ampd2	AMPD2_MOUSE	TB_24H-MOCK_24H	-0.649876	0.011509	0.0683876	no	-0.649876	0.0683876	AMP deaminase 2 (EC 3.5.4.6) (AMP deaminase isoform L)
O08739	Ampd3	AMPD3_MOUSE	TB_24H-MOCK_24H	0.342308	0.163181	0.41805	no	0.342308	0.41805	AMP deaminase 3 (EC 3.5.4.6) (AMP deaminase H-type) (AMP deaminase isoform E) (Heart-type AMPD)
P53995	Anapc1	APC1_MOUSE	TB_24H-MOCK_24H	-0.786773	0.0218652	0.108513	no	-0.786773	0.108513	Anaphase-promoting complex subunit 1 (APC1) (Cyclosome subunit 1) (Mitotic checkpoint regulator) (Testis-specific gene 24 protein)
Q9WVM3	Anapc7	APC7_MOUSE	TB_24H-MOCK_24H	-0.76871	0.00791791	0.050914	no	-0.76871	0.050914	Anaphase-promoting complex subunit 7 (APC7) (Cyclosome subunit 7) (Prediabetic NOD sera-reactive autoantigen)
Q810B6	Ankfy1	ANFY1_MOUSE	TB_24H-MOCK_24H	0.0171045	0.860063	0.944023	no	0.0171045	0.944023	Rabankyrin-5 (Rank-5) (Ankyrin repeat and FYVE domain-containing protein 1) (Ankyrin repeats hooked to a zinc finger motif)
Q6P1H6	Ankle2	ANKL2_MOUSE	TB_24H-MOCK_24H	1.00312	0.000441922	0.00513469	no	1.00312	0.00513469	Ankyrin repeat and LEM domain-containing protein 2 (LEM domain-containing protein 4)
Q80UP5	Ankrd13a	AN13A_MOUSE	TB_24H-MOCK_24H	-0.178227	0.582974	0.807404	no	-0.178227	0.807404	Ankyrin repeat domain-containing protein 13A
Q99NH0	Ankrd17	ANR17_MOUSE	TB_24H-MOCK_24H	0.364118	0.140523	0.386352	no	0.364118	0.386352	Ankyrin repeat domain-containing protein 17 (Ankyrin repeat domain-containing protein FOE) (Gene trap ankyrin repeat protein)
B2RXR6	Ankrd44	ANR44_MOUSE	TB_24H-MOCK_24H	-0.150092	0.507123	0.767596	no	-0.150092	0.767596	Serine/threonine-protein phosphatase 6 regulatory ankyrin repeat subunit B (PP6-ARS-B) (Serine/threonine-protein phosphatase 6 regulatory subunit ARS-B) (Ankyrin repeat domain-containing protein 44)
Q91WK7	Ankrd54	ANR54_MOUSE	TB_24H-MOCK_24H	-0.354292	0.328202	0.61524	no	-0.354292	0.61524	Ankyrin repeat domain-containing protein 54 (Lyn-interacting ankyrin repeat protein)
P59672	Anks1a	ANS1A_MOUSE	TB_24H-MOCK_24H	0.160435	0.492459	0.759788	no	0.160435	0.759788	Ankyrin repeat and SAM domain-containing protein 1A (Odin)
Q8K298	Anln	ANLN_MOUSE	TB_24H-MOCK_24H	#NUM!		0	yes	-5.85836	0.0295802	Anillin
Q8BH79	Ano10	ANO10_MOUSE	TB_24H-MOCK_24H	-0.248007	0.226479	0.502119	no	-0.248007	0.502119	Anoctamin-10 (Transmembrane protein 16K)
Q6P9J9	Ano6	ANO6_MOUSE	TB_24H-MOCK_24H	-0.214681	0.0997003	0.306545	no	-0.214681	0.306545	Anoctamin-6 (Small-conductance calcium-activated nonselective cation channel) (SCAN channel) (Transmembrane protein 16F)
O35381	Anp32a	AN32A_MOUSE	TB_24H-MOCK_24H	-0.0955387	0.840248	0.933582	no	-0.0955387	0.933582	Acidic leucine-rich nuclear phosphoprotein 32 family member A (Acidic nuclear phosphoprotein pp32) (Leucine-rich acidic nuclear protein) (LANP) (Potent heat-stable protein phosphatase 2A inhibitor I1PP2A)
Q9EST5	Anp32b	AN32B_MOUSE	TB_24H-MOCK_24H	-0.253029	0.41025	0.68957	no	-0.253029	0.68957	Acidic leucine-rich nuclear phosphoprotein 32 family member B (Proliferation-related acidic leucine-rich protein PAL31)
P97822	Anp32e	AN32E_MOUSE	TB_24H-MOCK_24H	-0.374759	0.21589	0.485878	no	-0.374759	0.485878	Acidic leucine-rich nuclear phosphoprotein 32 family member E (Cerebellar postnatal development protein 1) (LANP-like protein) (LANP-L)
P97449	Anpep	AMPN_MOUSE	TB_24H-MOCK_24H	0.566608	0.000226146	0.00300828	no	0.566608	0.00300828	Aminopeptidase N (AP-N) (mAPN) (EC 3.4.11.2) (Alanyl aminopeptidase) (Aminopeptidase M) (AP-M) (Membrane protein p161) (Microsomal aminopeptidase) (CD antigen CD13)
Q6DFX2	Antxr2	ANTR2_MOUSE	TB_24H-MOCK_24H	-0.375776	0.432273	0.709941	no	-0.375776	0.709941	Anthrax toxin receptor 2
P10107	Anxa1	ANXA1_MOUSE	TB_24H-MOCK_24H	-0.40854	1.7494e-07	6.04637e-06	no	-0.40854	6.04637e-06	Annexin A1 (Annexin I) (Annexin-1) (Calpactin II) (Calpactin-2) (Chromobindin-9) (Lipocortin I) (Phospholipase A2 inhibitory protein) (p35)
P97384	Anxa11	ANX11_MOUSE	TB_24H-MOCK_24H	-0.0996601	0.389569	0.671313	no	-0.0996601	0.671313	Annexin A11 (Annexin XI) (Annexin-11) (Calcyclin-associated annexin 50) (CAP-50)
P07356	Anxa2	ANXA2_MOUSE	TB_24H-MOCK_24H	0.158986	0.049576	0.190764	no	0.158986	0.190764	Annexin A2 (Annexin II) (Annexin-2) (Calpactin I heavy chain) (Calpactin-1 heavy chain) (Chromobindin-8) (Lipocortin II) (Placental anticoagulant protein IV) (PAP-IV) (Protein I) (p36)
O35639	Anxa3	ANXA3_MOUSE	TB_24H-MOCK_24H	0.0542244	0.496923	0.762587	no	0.0542244	0.762587	Annexin A3 (35-alpha calcimedin) (Annexin III) (Annexin-3) (Lipocortin III) (Placental anticoagulant protein III) (PAP-III)
P97429	Anxa4	ANXA4_MOUSE	TB_24H-MOCK_24H	0.462852	0.000190969	0.00258476	no	0.462852	0.00258476	Annexin A4 (Annexin IV) (Annexin-4)
P48036	Anxa5	ANXA5_MOUSE	TB_24H-MOCK_24H	-0.00829102	0.949186	0.979474	no	-0.00829102	0.979474	Annexin A5 (Anchorin CII) (Annexin V) (Annexin-5) (Calphobindin I) (CBP-I) (Endonexin II) (Lipocortin V) (Placental anticoagulant protein 4) (PP4) (Placental anticoagulant protein I) (PAP-I) (Thromboplastin inhibitor) (Vascular anticoagulant-alpha) (VAC-alpha)
P14824	Anxa6	ANXA6_MOUSE	TB_24H-MOCK_24H	0.455585	1.00802e-05	0.000214398	no	0.455585	0.000214398	Annexin A6 (67 kDa calelectrin) (Annexin VI) (Annexin-6) (Calphobindin-II) (CPB-II) (Chromobindin-20) (Lipocortin VI) (Protein III) (p68) (p70)
Q07076	Anxa7	ANXA7_MOUSE	TB_24H-MOCK_24H	0.0424612	0.635229	0.836409	no	0.0424612	0.836409	Annexin A7 (Annexin VII) (Annexin-7) (Synexin)
O35298	Aoah	AOAH_MOUSE	TB_24H-MOCK_24H	1.38346	0.000111719	0.00163193	no	1.38346	0.00163193	Acyloxyacyl hydrolase (EC 3.1.1.77) [Cleaved into: Acyloxyacyl hydrolase small subunit; Acyloxyacyl hydrolase large subunit]
O35643	Ap1b1	AP1B1_MOUSE	TB_24H-MOCK_24H	0.136051	0.134048	0.373847	no	0.136051	0.373847	AP-1 complex subunit beta-1 (Adaptor protein complex AP-1 subunit beta-1) (Adaptor-related protein complex 1 subunit beta-1) (Beta-1-adaptin) (Beta-adaptin 1) (Clathrin assembly protein complex 1 beta large chain) (Golgi adaptor HA1/AP1 adaptin beta subunit)
P22892	Ap1g1	AP1G1_MOUSE	TB_24H-MOCK_24H	0.132144	0.369177	0.65751	no	0.132144	0.65751	AP-1 complex subunit gamma-1 (Adaptor protein complex AP-1 subunit gamma-1) (Adaptor-related protein complex 1 subunit gamma-1) (Clathrin assembly protein complex 1 gamma-1 large chain) (Gamma-adaptin) (Gamma1-adaptin) (Golgi adaptor HA1/AP1 adaptin subunit gamma-1)
O88512	Ap1g2	AP1G2_MOUSE	TB_24H-MOCK_24H	-0.391186	0.279897	0.562207	no	-0.391186	0.562207	AP-1 complex subunit gamma-like 2 (Gamma2-adaptin) (G2ad)
P35585	Ap1m1	AP1M1_MOUSE	TB_24H-MOCK_24H	-0.167682	0.386421	0.669623	no	-0.167682	0.669623	AP-1 complex subunit mu-1 (AP-mu chain family member mu1A) (Adaptor protein complex AP-1 subunit mu-1) (Adaptor-related protein complex 1 subunit mu-1) (Clathrin assembly protein complex 1 mu-1 medium chain 1) (Clathrin coat assembly protein AP47) (Clathrin coat-associated protein AP47) (Golgi adaptor HA1/AP1 adaptin mu-1 subunit) (Mu-adaptin 1) (Mu1A-adaptin)
P61967	Ap1s1	AP1S1_MOUSE	TB_24H-MOCK_24H	0.16116	0.421399	0.701929	no	0.16116	0.701929	AP-1 complex subunit sigma-1A (Adaptor protein complex AP-1 subunit sigma-1A) (Adaptor-related protein complex 1 subunit sigma-1A) (Clathrin assembly protein complex 1 sigma-1A small chain) (Clathrin coat assembly protein AP19) (Golgi adaptor HA1/AP1 adaptin sigma-1A subunit) (HA1 19 kDa subunit) (Sigma 1a subunit of AP-1 clathrin) (Sigma-adaptin 1A) (Sigma1A-adaptin)
P17426	Ap2a1	AP2A1_MOUSE	TB_24H-MOCK_24H	0.046675	0.748724	0.891166	no	0.046675	0.891166	AP-2 complex subunit alpha-1 (100 kDa coated vesicle protein A) (Adaptor protein complex AP-2 subunit alpha-1) (Adaptor-related protein complex 2 subunit alpha-1) (Alpha-adaptin A) (Alpha1-adaptin) (Clathrin assembly protein complex 2 alpha-A large chain) (Plasma membrane adaptor HA2/AP2 adaptin alpha A subunit)
P17427	Ap2a2	AP2A2_MOUSE	TB_24H-MOCK_24H	-0.0658665	0.624486	0.830431	no	-0.0658665	0.830431	AP-2 complex subunit alpha-2 (100 kDa coated vesicle protein C) (Adaptor protein complex AP-2 subunit alpha-2) (Adaptor-related protein complex 2 subunit alpha-2) (Alpha-adaptin C) (Alpha2-adaptin) (Clathrin assembly protein complex 2 alpha-C large chain) (Plasma membrane adaptor HA2/AP2 adaptin alpha C subunit)
Q9DBG3	Ap2b1	AP2B1_MOUSE	TB_24H-MOCK_24H	-0.0390718	0.724542	0.88011	no	-0.0390718	0.88011	AP-2 complex subunit beta (AP105B) (Adaptor protein complex AP-2 subunit beta) (Adaptor-related protein complex 2 subunit beta) (Beta-2-adaptin) (Beta-adaptin) (Clathrin assembly protein complex 2 beta large chain) (Plasma membrane adaptor HA2/AP2 adaptin beta subunit)
P84091	Ap2m1	AP2M1_MOUSE	TB_24H-MOCK_24H	0.0205639	0.723108	0.87996	no	0.0205639	0.87996	AP-2 complex subunit mu (AP-2 mu chain) (Adaptor protein complex AP-2 subunit mu) (Adaptor-related protein complex 2 subunit mu) (Clathrin assembly protein complex 2 mu medium chain) (Clathrin coat assembly protein AP50) (Clathrin coat-associated protein AP50) (Mu2-adaptin) (Plasma membrane adaptor AP-2 50 kDa protein)
P62743	Ap2s1	AP2S1_MOUSE	TB_24H-MOCK_24H	-0.0154968	0.946169	0.978493	no	-0.0154968	0.978493	AP-2 complex subunit sigma (Adaptor protein complex AP-2 subunit sigma) (Adaptor-related protein complex 2 subunit sigma) (Clathrin assembly protein 2 sigma small chain) (Clathrin coat assembly protein AP17) (Clathrin coat-associated protein AP17) (Plasma membrane adaptor AP-2 17 kDa protein) (Sigma-adaptin 3b) (Sigma2-adaptin)
Q9Z1T1	Ap3b1	AP3B1_MOUSE	TB_24H-MOCK_24H	0.0248931	0.722506	0.879745	no	0.0248931	0.879745	AP-3 complex subunit beta-1 (Adaptor protein complex AP-3 subunit beta-1) (Adaptor-related protein complex 3 subunit beta-1) (Beta-3A-adaptin) (Clathrin assembly protein complex 3 beta-1 large chain)
O54774	Ap3d1	AP3D1_MOUSE	TB_24H-MOCK_24H	0.133136	0.478599	0.748601	no	0.133136	0.748601	AP-3 complex subunit delta-1 (AP-3 complex subunit delta) (Adaptor-related protein complex 3 subunit delta-1) (Delta-adaptin) (mBLVR1)
Q9JKC8	Ap3m1	AP3M1_MOUSE	TB_24H-MOCK_24H	-0.125103	0.404687	0.68259	no	-0.125103	0.68259	AP-3 complex subunit mu-1 (AP-3 adaptor complex mu3A subunit) (Adaptor-related protein complex 3 subunit mu-1) (Mu-adaptin 3A) (Mu3A-adaptin)
Q9DCR2	Ap3s1	AP3S1_MOUSE	TB_24H-MOCK_24H	0.153211	0.138208	0.382472	no	0.153211	0.382472	AP-3 complex subunit sigma-1 (AP-3 complex subunit sigma-3A) (Adaptor-related protein complex 3 subunit sigma-1) (Sigma-3A-adaptin) (Sigma3A-adaptin) (Sigma-adaptin 3a)
Q3TAP4	Ap5b1	AP5B1_MOUSE	TB_24H-MOCK_24H	-0.159236	0.779975	0.907813	no	-0.159236	0.907813	AP-5 complex subunit beta-1 (Adaptor-related protein complex 5 beta subunit) (Beta5)
Q3U829	Ap5z1	AP5Z1_MOUSE	TB_24H-MOCK_24H	-0.171844	0.500273	0.764532	no	-0.171844	0.764532	AP-5 complex subunit zeta-1 (Adaptor-related protein complex 5 zeta subunit) (Zeta5)
O88879	Apaf1	APAF_MOUSE	TB_24H-MOCK_24H	0.247747	0.0722009	0.247117	no	0.247747	0.247117	Apoptotic protease-activating factor 1 (APAF-1)
Q8R5A3	Apbb1ip	AB1IP_MOUSE	TB_24H-MOCK_24H	-0.578622	0.00641442	0.0435618	no	-0.578622	0.0435618	Amyloid beta A4 precursor protein-binding family B member 1-interacting protein (APBB1-interacting protein 1) (Proline-rich EVH1 ligand 1) (PREL-1) (Proline-rich protein 48)
Q8R146	Apeh	APEH_MOUSE	TB_24H-MOCK_24H	-0.118176	0.356536	0.645533	no	-0.118176	0.645533	Acylamino-acid-releasing enzyme (AARE) (EC 3.4.19.1) (Acyl-peptide hydrolase) (APH) (Acylaminoacyl-peptidase)
P28352	Apex1	APEX1_MOUSE	TB_24H-MOCK_24H	-0.322143	0.314989	0.600936	no	-0.322143	0.600936	DNA-(apurinic or apyrimidinic site) lyase (EC 3.1.-.-) (EC 4.2.99.18) (APEX nuclease) (APEN) (Apurinic-apyrimidinic endonuclease 1) (AP endonuclease 1) (REF-1) (Redox factor-1) [Cleaved into: DNA-(apurinic or apyrimidinic site) lyase, mitochondrial]
O35841	Api5	API5_MOUSE	TB_24H-MOCK_24H	-0.273276	0.146238	0.393664	no	-0.273276	0.393664	Apoptosis inhibitor 5 (API-5) (AAC-11)
Q9WVQ5	Apip	MTNB_MOUSE	TB_24H-MOCK_24H	0.220253	0.16874	0.425225	no	0.220253	0.425225	Methylthioribulose-1-phosphate dehydratase (MTRu-1-P dehydratase) (EC 4.2.1.109) (APAF1-interacting protein) (Monocyte/macrophage protein 19)
Q9D7N9	Apmap	APMAP_MOUSE	TB_24H-MOCK_24H	-0.0428954	0.75707	0.896103	no	-0.0428954	0.896103	Adipocyte plasma membrane-associated protein (Protein DD16)
P51908	Apobec1	ABEC1_MOUSE	TB_24H-MOCK_24H	0.198599	0.47159	0.743595	no	0.198599	0.743595	C->U-editing enzyme APOBEC-1 (EC 3.5.4.36) (Apolipoprotein B mRNA-editing enzyme 1) (mRNA(cytosine(6666)) deaminase 1)
Q99J72	Apobec3	ABEC3_MOUSE	TB_24H-MOCK_24H	0.76515	0.00627483	0.0429149	no	0.76515	0.0429149	DNA dC->dU-editing enzyme APOBEC-3 (EC 3.5.4.-) (Apolipoprotein B mRNA-editing complex 3) (Arp3) (CEM-15) (CEM15)
Q8VBT6	Apobr	APOBR_MOUSE	TB_24H-MOCK_24H	-0.447204	0.0127603	0.073017	no	-0.447204	0.073017	Apolipoprotein B receptor (Apolipoprotein B-100 receptor) (Apolipoprotein B48 receptor) (apoB-48R)
P08226	Apoe	APOE_MOUSE	TB_24H-MOCK_24H	0.382027	0.00175053	0.0159442	no	0.382027	0.0159442	Apolipoprotein E (Apo-E)
Q9DCZ4	Apoo	MIC26_MOUSE	TB_24H-MOCK_24H	-0.199509	0.564948	0.796981	no	-0.199509	0.796981	MICOS complex subunit Mic26 (Apolipoprotein O) (MICOS complex subunit Mic23) (Protein FAM121B)
Q78IK4	Apool	MIC27_MOUSE	TB_24H-MOCK_24H	0.0638846	0.747061	0.891166	no	0.0638846	0.891166	MICOS complex subunit Mic27 (Apolipoprotein O-like) (Protein FAM121A)
P12023	App	A4_MOUSE	TB_24H-MOCK_24H	0.187097	0.598237	0.814901	no	0.187097	0.814901	Amyloid beta A4 protein (ABPP) (APP) (Alzheimer disease amyloid A4 protein homolog) (Amyloid precursor protein) (Amyloidogenic glycoprotein) (AG) (Beta-amyloid precursor protein) [Cleaved into: N-APP; Soluble APP-alpha (S-APP-alpha); Soluble APP-beta (S-APP-beta); C99 (APP-C99); Beta-amyloid protein 42 (Beta-APP42); Beta-amyloid protein 40 (Beta-APP40); C83; P3(42); P3(40); C80; Gamma-secretase C…
Q8K3H0	Appl1	DP13A_MOUSE	TB_24H-MOCK_24H	-0.363355	0.006574	0.0439514	no	-0.363355	0.0439514	DCC-interacting protein 13-alpha (Dip13-alpha) (Adapter protein containing PH domain, PTB domain and leucine zipper motif 1)
Q8K3G9	Appl2	DP13B_MOUSE	TB_24H-MOCK_24H	0.0139185	0.912533	0.962249	no	0.0139185	0.962249	DCC-interacting protein 13-beta (Dip13-beta) (Adapter protein containing PH domain, PTB domain and leucine zipper motif 2)
P08030	Aprt	APT_MOUSE	TB_24H-MOCK_24H	-0.24832	0.267415	0.551204	no	-0.24832	0.551204	Adenine phosphoribosyltransferase (APRT) (EC 2.4.2.7)
Q8CFQ3	Aqr	AQR_MOUSE	TB_24H-MOCK_24H	1.61542	0.172822	0.432167	no	1.61542	0.432167	Intron-binding protein aquarius
P04627	Araf	ARAF_MOUSE	TB_24H-MOCK_24H	-0.697967	0.011881	0.0698957	no	-0.697967	0.0698957	Serine/threonine-protein kinase A-Raf (EC 2.7.11.1) (Proto-oncogene A-Raf)
Q4LDD4	Arap1	ARAP1_MOUSE	TB_24H-MOCK_24H	0.486247	0.00246484	0.0207874	no	0.486247	0.0207874	Arf-GAP with Rho-GAP domain, ANK repeat and PH domain-containing protein 1 (Centaurin-delta-2) (Cnt-d2)
Q8BZ05	Arap2	ARAP2_MOUSE	TB_24H-MOCK_24H	0.857511	0.267961	0.55145	no	0.857511	0.55145	Arf-GAP with Rho-GAP domain, ANK repeat and PH domain-containing protein 2 (Centaurin-delta-1) (Cnt-d1)
Q5XJY5	Arcn1	COPD_MOUSE	TB_24H-MOCK_24H	0.0942392	0.395529	0.676279	no	0.0942392	0.676279	Coatomer subunit delta (Archain) (Delta-coat protein) (Delta-COP)
P84078	Arf1	ARF1_MOUSE	TB_24H-MOCK_24H	0.248365	0.426359	0.705615	no	0.248365	0.705615	ADP-ribosylation factor 1
Q8BSL7	Arf2	ARF2_MOUSE	TB_24H-MOCK_24H	0.68272	0.307946	0.594839	no	0.68272	0.594839	ADP-ribosylation factor 2
P61750	Arf4	ARF4_MOUSE	TB_24H-MOCK_24H	0.619431	0.0949464	0.295686	no	0.619431	0.295686	ADP-ribosylation factor 4
P84084	Arf5	ARF5_MOUSE	TB_24H-MOCK_24H	0.0931829	0.687423	0.860492	no	0.0931829	0.860492	ADP-ribosylation factor 5
P62331	Arf6	ARF6_MOUSE	TB_24H-MOCK_24H	-0.0023814	0.994503	0.997854	no	-0.0023814	0.997854	ADP-ribosylation factor 6
Q9EPJ9	Arfgap1	ARFG1_MOUSE	TB_24H-MOCK_24H	-0.181913	0.518379	0.772261	no	-0.181913	0.772261	ADP-ribosylation factor GTPase-activating protein 1 (ARF GAP 1) (ADP-ribosylation factor 1 GTPase-activating protein) (ARF1 GAP) (ARF1-directed GTPase-activating protein)
Q99K28	Arfgap2	ARFG2_MOUSE	TB_24H-MOCK_24H	-0.422323	0.0347407	0.149198	no	-0.422323	0.149198	ADP-ribosylation factor GTPase-activating protein 2 (ARF GAP 2) (GTPase-activating protein ZNF289) (Zinc finger protein 289)
Q9D8S3	Arfgap3	ARFG3_MOUSE	TB_24H-MOCK_24H	-0.0125988	0.937249	0.975575	no	-0.0125988	0.975575	ADP-ribosylation factor GTPase-activating protein 3 (ARF GAP 3)
G3X9K3	Arfgef1	BIG1_MOUSE	TB_24H-MOCK_24H	-0.00551151	0.982957	0.992839	no	-0.00551151	0.992839	Brefeldin A-inhibited guanine nucleotide-exchange protein 1 (BIG1) (Brefeldin A-inhibited GEP 1) (ADP-ribosylation factor guanine nucleotide-exchange factor 1)
A2A5R2	Arfgef2	BIG2_MOUSE	TB_24H-MOCK_24H	0.0554911	0.796417	0.914816	no	0.0554911	0.914816	Brefeldin A-inhibited guanine nucleotide-exchange protein 2 (Brefeldin A-inhibited GEP 2) (ADP-ribosylation factor guanine nucleotide-exchange factor 2)
Q61176	Arg1	ARGI1_MOUSE	TB_24H-MOCK_24H	2.01454	8.98256e-05	0.00140775	no	2.01454	0.00140775	Arginase-1 (EC 3.5.3.1) (Liver-type arginase) (Type I arginase)
Q5FWK3	Arhgap1	RHG01_MOUSE	TB_24H-MOCK_24H	-0.222725	0.135133	0.376311	no	-0.222725	0.376311	Rho GTPase-activating protein 1 (Rho-type GTPase-activating protein 1)
Q6Y5D8	Arhgap10	RHG10_MOUSE	TB_24H-MOCK_24H	-0.623974	0.0225166	0.111034	no	-0.623974	0.111034	Rho GTPase-activating protein 10 (PH and SH3 domain-containing rhoGAP protein) (PS-GAP) (PSGAP) (Rho-type GTPase-activating protein 10)
Q8C0D4	Arhgap12	RHG12_MOUSE	TB_24H-MOCK_24H	0.100915	0.651097	0.841816	no	0.100915	0.841816	Rho GTPase-activating protein 12 (Rho-type GTPase-activating protein 12)
Q811M1	Arhgap15	RHG15_MOUSE	TB_24H-MOCK_24H	-0.241577	0.450121	0.727464	no	-0.241577	0.727464	Rho GTPase-activating protein 15 (ArhGAP15) (Rho-type GTPase-activating protein 15)
Q3UIA2	Arhgap17	RHG17_MOUSE	TB_24H-MOCK_24H	0.149594	0.350374	0.637958	no	0.149594	0.637958	Rho GTPase-activating protein 17 (Neuron-associated developmentally-regulated protein) (Nadrin) (Rho-type GTPase-activating protein 17)
Q8K0Q5	Arhgap18	RHG18_MOUSE	TB_24H-MOCK_24H	-0.559399	0.0144575	0.0793831	no	-0.559399	0.0793831	Rho GTPase-activating protein 18 (Rho-type GTPase-activating protein 18)
Q8BL80	Arhgap22	RHG22_MOUSE	TB_24H-MOCK_24H	-0.166602	0.213095	0.482675	no	-0.166602	0.482675	Rho GTPase-activating protein 22 (Rho-type GTPase-activating protein 22) (p68RacGAP)
Q8C4V1	Arhgap24	RHG24_MOUSE	TB_24H-MOCK_24H	-0.0770719	0.85543	0.941532	no	-0.0770719	0.941532	Rho GTPase-activating protein 24 (Rho-type GTPase-activating protein 24)
Q8BYW1	Arhgap25	RHG25_MOUSE	TB_24H-MOCK_24H	-0.113438	0.184725	0.451433	no	-0.113438	0.451433	Rho GTPase-activating protein 25 (Rho-type GTPase-activating protein 25)
A2AB59	Arhgap27	RHG27_MOUSE	TB_24H-MOCK_24H	0.0373832	0.905049	0.95935	no	0.0373832	0.95935	Rho GTPase-activating protein 27 (CIN85-associated multi-domain-containing Rho GTPase-activating protein 1) (Rho-type GTPase-activating protein 27)
Q640N3	Arhgap30	RHG30_MOUSE	TB_24H-MOCK_24H	0.105046	0.436115	0.71413	no	0.105046	0.71413	Rho GTPase-activating protein 30 (Rho-type GTPase-activating protein 30)
A6X8Z5	Arhgap31	RHG31_MOUSE	TB_24H-MOCK_24H	0.109427	0.583251	0.807497	no	0.109427	0.807497	Rho GTPase-activating protein 31 (Cdc42 GTPase-activating protein)
O54834	Arhgap6	RHG06_MOUSE	TB_24H-MOCK_24H	-0.610576	0.00474746	0.0340954	no	-0.610576	0.0340954	Rho GTPase-activating protein 6 (Rho-type GTPase-activating protein 6) (Rho-type GTPase-activating protein RhoGAPX-1)
Q99PT1	Arhgdia	GDIR1_MOUSE	TB_24H-MOCK_24H	0.02801	0.943979	0.97809	no	0.02801	0.97809	Rho GDP-dissociation inhibitor 1 (Rho GDI 1) (GDI-1) (Rho-GDI alpha)
Q61599	Arhgdib	GDIR2_MOUSE	TB_24H-MOCK_24H	0.106766	0.740047	0.887169	no	0.106766	0.887169	Rho GDP-dissociation inhibitor 2 (Rho GDI 2) (D4) (Rho-GDI beta)
Q61210	Arhgef1	ARHG1_MOUSE	TB_24H-MOCK_24H	-0.198629	0.0236354	0.114867	no	-0.198629	0.114867	Rho guanine nucleotide exchange factor 1 (Lbc's second cousin) (Lymphoid blast crisis-like 2)
A2AWP8	Arhgef10l	ARGAL_MOUSE	TB_24H-MOCK_24H	-0.0905243	0.640382	0.83692	no	-0.0905243	0.83692	Rho guanine nucleotide exchange factor 10-like protein (GrinchGEF)
Q60875	Arhgef2	ARHG2_MOUSE	TB_24H-MOCK_24H	0.081538	0.582334	0.806805	no	0.081538	0.806805	Rho guanine nucleotide exchange factor 2 (Guanine nucleotide exchange factor H1) (GEF-H1) (LBC'S first cousin) (Lymphoid blast crisis-like 1) (Oncogene LFC) (Rhobin)
Q8K4I3	Arhgef6	ARHG6_MOUSE	TB_24H-MOCK_24H	-0.575474	0.0182669	0.0949426	no	-0.575474	0.0949426	Rho guanine nucleotide exchange factor 6 (Alpha-PIX) (Rac/Cdc42 guanine nucleotide exchange factor 6)
Q9ES28	Arhgef7	ARHG7_MOUSE	TB_24H-MOCK_24H	-0.738494	4.10811e-05	0.00073225	no	-0.738494	0.00073225	Rho guanine nucleotide exchange factor 7 (Beta-Pix) (PAK-interacting exchange factor beta) (p85SPR)
A2BH40	Arid1a	ARI1A_MOUSE	TB_24H-MOCK_24H	-0.156259	0.511486	0.770414	no	-0.156259	0.770414	AT-rich interactive domain-containing protein 1A (ARID domain-containing protein 1A) (BRG1-associated factor 250) (BAF250) (BRG1-associated factor 250a) (BAF250A) (Osa homolog 1) (SWI-like protein) (SWI/SNF complex protein p270) (SWI/SNF-related, matrix-associated, actin-dependent regulator of chromatin subfamily F member 1)
Q9Z1K5	Arih1	ARI1_MOUSE	TB_24H-MOCK_24H	-0.287806	0.529548	0.777136	no	-0.287806	0.777136	E3 ubiquitin-protein ligase ARIH1 (EC 2.3.2.-) (Protein ariadne-1 homolog) (ARI-1) (RING-type E3 ubiquitin transferase ARIH1) (UbcH7-binding protein) (UbcM4-interacting protein 77) (Ubiquitin-conjugating enzyme E2-binding protein 1)
Q9Z1K6	Arih2	ARI2_MOUSE	TB_24H-MOCK_24H	0.353731	0.100553	0.308677	no	0.353731	0.308677	E3 ubiquitin-protein ligase ARIH2 (ARI-2) (Protein ariadne-2 homolog) (EC 2.3.2.-) (RING-type E3 ubiquitin transferase ARIH2) (Triad1 protein) (UbcM4-interacting protein 48)
P61211	Arl1	ARL1_MOUSE	TB_24H-MOCK_24H	0.254517	0.332603	0.619589	no	0.254517	0.619589	ADP-ribosylation factor-like protein 1
Q6P3A9	Arl11	ARL11_MOUSE	TB_24H-MOCK_24H	-0.784891	0.0140968	0.078298	no	-0.784891	0.078298	ADP-ribosylation factor-like protein 11
Q9D385	Arl2bp	AR2BP_MOUSE	TB_24H-MOCK_24H	-0.605664	0.0658496	0.231945	no	-0.605664	0.231945	ADP-ribosylation factor-like protein 2-binding protein (ARF-like 2-binding protein) (Binder of ARF2 protein 1)
Q9JKW0	Arl6ip1	AR6P1_MOUSE	TB_24H-MOCK_24H	0.18378	0.535628	0.780088	no	0.18378	0.780088	ADP-ribosylation factor-like protein 6-interacting protein 1 (ARL-6-interacting protein 1) (Aip-1) (Protein TBX2)
Q8R5J9	Arl6ip5	PRAF3_MOUSE	TB_24H-MOCK_24H	-0.396803	0.70079	0.869421	no	-0.396803	0.869421	PRA1 family protein 3 (ADP-ribosylation factor-like protein 6-interacting protein 5) (ARL-6-interacting protein 5) (Aip-5) (Addicsin) (GTRAP3-18) (Glutamate transporter EAAC1-interacting protein) (Prenylated Rab acceptor protein 2) (Protein JWa)
Q8VEH3	Arl8a	ARL8A_MOUSE	TB_24H-MOCK_24H	0.0062778	0.987539	0.995253	no	0.0062778	0.995253	ADP-ribosylation factor-like protein 8A (ADP-ribosylation factor-like protein 10B) (Novel small G protein indispensable for equal chromosome segregation 2)
Q9CQW2	Arl8b	ARL8B_MOUSE	TB_24H-MOCK_24H	-0.150326	0.211796	0.482126	no	-0.150326	0.482126	ADP-ribosylation factor-like protein 8B (ADP-ribosylation factor-like protein 10C) (Novel small G protein indispensable for equal chromosome segregation 1)
Q9D7A8	Armc1	ARMC1_MOUSE	TB_24H-MOCK_24H	-0.512029	0.0540009	0.201774	no	-0.512029	0.201774	Armadillo repeat-containing protein 1
Q9D0L7	Armc10	ARM10_MOUSE	TB_24H-MOCK_24H	-0.222744	0.191946	0.45894	no	-0.222744	0.45894	Armadillo repeat-containing protein 10
Q8BNU0	Armc6	ARMC6_MOUSE	TB_24H-MOCK_24H	-0.224321	0.515625	0.772261	no	-0.224321	0.772261	Armadillo repeat-containing protein 6
Q9DBR3	Armc8	ARMC8_MOUSE	TB_24H-MOCK_24H	0.0906232	0.771712	0.904352	no	0.0906232	0.904352	Armadillo repeat-containing protein 8
Q8BHS6	Armcx3	ARMX3_MOUSE	TB_24H-MOCK_24H	0.451509	0.214484	0.484686	no	0.451509	0.484686	Armadillo repeat-containing X-linked protein 3
Q9R0Q6	Arpc1a	ARC1A_MOUSE	TB_24H-MOCK_24H	0.210316	0.506377	0.76701	no	0.210316	0.76701	Actin-related protein 2/3 complex subunit 1A (SOP2-like protein) (Sid 329)
Q9WV32	Arpc1b	ARC1B_MOUSE	TB_24H-MOCK_24H	0.0923202	0.427495	0.705987	no	0.0923202	0.705987	Actin-related protein 2/3 complex subunit 1B (Arp2/3 complex 41 kDa subunit) (p41-ARC)
Q9CVB6	Arpc2	ARPC2_MOUSE	TB_24H-MOCK_24H	0.0917384	0.640436	0.83692	no	0.0917384	0.83692	Actin-related protein 2/3 complex subunit 2 (Arp2/3 complex 34 kDa subunit) (p34-ARC)
Q9JM76	Arpc3	ARPC3_MOUSE	TB_24H-MOCK_24H	0.0469131	0.688112	0.860492	no	0.0469131	0.860492	Actin-related protein 2/3 complex subunit 3 (Arp2/3 complex 21 kDa subunit) (p21-ARC)
P59999	Arpc4	ARPC4_MOUSE	TB_24H-MOCK_24H	-0.0331237	0.877906	0.947627	no	-0.0331237	0.947627	Actin-related protein 2/3 complex subunit 4 (Arp2/3 complex 20 kDa subunit) (p20-ARC)
Q9CPW4	Arpc5	ARPC5_MOUSE	TB_24H-MOCK_24H	-0.0352426	0.775616	0.905978	no	-0.0352426	0.905978	Actin-related protein 2/3 complex subunit 5 (Arp2/3 complex 16 kDa subunit) (p16-ARC)
Q9D898	Arpc5l	ARP5L_MOUSE	TB_24H-MOCK_24H	-0.916732	0.00913823	0.0568715	no	-0.916732	0.0568715	Actin-related protein 2/3 complex subunit 5-like protein (Arp2/3 complex 16 kDa subunit 2) (ARC16-2)
Q9D0A3	Arpin	ARPIN_MOUSE	TB_24H-MOCK_24H	-0.0519376	0.874596	0.945978	no	-0.0519376	0.945978	Arpin (Arp2/3 inhibition protein)
Q8BWG8	Arrb1	ARRB1_MOUSE	TB_24H-MOCK_24H	-0.485476	0.279474	0.562207	no	-0.485476	0.562207	Beta-arrestin-1 (Arrestin beta-1)
Q91YI4	Arrb2	ARRB2_MOUSE	TB_24H-MOCK_24H	-0.336136	0.6796	0.855355	no	-0.336136	0.855355	Beta-arrestin-2 (Arrestin beta-2)
P50428	Arsa	ARSA_MOUSE	TB_24H-MOCK_24H	0.363506	0.263964	0.54784	no	0.363506	0.54784	Arylsulfatase A (ASA) (EC 3.1.6.8) (Cerebroside-sulfatase)
P50429	Arsb	ARSB_MOUSE	TB_24H-MOCK_24H	0.923023	0.136541	0.379434	no	0.923023	0.379434	Arylsulfatase B (ASB) (EC 3.1.6.12) (N-acetylgalactosamine-4-sulfatase) (G4S)
Q9WV54	Asah1	ASAH1_MOUSE	TB_24H-MOCK_24H	0.398251	0.106921	0.323099	no	0.398251	0.323099	Acid ceramidase (AC) (ACDase) (Acid CDase) (EC 3.5.1.23) (Acylsphingosine deacylase) (N-acylsphingosine amidohydrolase) [Cleaved into: Acid ceramidase subunit alpha; Acid ceramidase subunit beta]
Q9QWY8	Asap1	ASAP1_MOUSE	TB_24H-MOCK_24H	-0.17493	0.248404	0.530376	no	-0.17493	0.530376	Arf-GAP with SH3 domain, ANK repeat and PH domain-containing protein 1 (130 kDa phosphatidylinositol 4,5-bisphosphate-dependent ARF1 GTPase-activating protein) (ADP-ribosylation factor-directed GTPase-activating protein 1) (ARF GTPase-activating protein 1) (Development and differentiation-enhancing factor 1) (DEF-1) (Differentiation-enhancing factor 1) (PIP2-dependent ARF1 GAP)
Q91WR3	Ascc2	ASCC2_MOUSE	TB_24H-MOCK_24H	-0.131806	0.648633	0.840067	no	-0.131806	0.840067	Activating signal cointegrator 1 complex subunit 2 (ASC-1 complex subunit p100) (Trip4 complex subunit p100)
E9PZJ8	Ascc3	ASCC3_MOUSE	TB_24H-MOCK_24H	0.372526	0.282686	0.56586	no	0.372526	0.56586	Activating signal cointegrator 1 complex subunit 3 (EC 3.6.4.12)
Q91X20	Ash2l	ASH2L_MOUSE	TB_24H-MOCK_24H	0.0769172	0.77711	0.906628	no	0.0769172	0.906628	Set1/Ash2 histone methyltransferase complex subunit ASH2 (ASH2-like protein)
Q91YI0	Asl	ARLY_MOUSE	TB_24H-MOCK_24H	0.0119882	0.936904	0.975575	no	0.0119882	0.975575	Argininosuccinate lyase (ASAL) (EC 4.3.2.1) (Arginosuccinase)
O54984	Asna1	ASNA_MOUSE	TB_24H-MOCK_24H	0.04632	0.691939	0.863605	no	0.04632	0.863605	ATPase Asna1 (EC 3.6.-.-) (Arsenical pump-driving ATPase) (Arsenite-stimulated ATPase)
Q61024	Asns	ASNS_MOUSE	TB_24H-MOCK_24H	-0.0470333	0.869211	0.945926	no	-0.0470333	0.945926	Asparagine synthetase [glutamine-hydrolyzing] (EC 6.3.5.4) (Glutamine-dependent asparagine synthetase)
Q8BSY0	Asph	ASPH_MOUSE	TB_24H-MOCK_24H	-0.169774	0.0699221	0.241546	no	-0.169774	0.241546	Aspartyl/asparaginyl beta-hydroxylase (EC 1.14.11.16) (Aspartate beta-hydroxylase) (ASP beta-hydroxylase) (Peptide-aspartate beta-dioxygenase)
Q8VBT9	Aspscr1	ASPC1_MOUSE	TB_24H-MOCK_24H	-0.475376	0.0394692	0.162884	no	-0.475376	0.162884	Tether containing UBX domain for GLUT4 (Alveolar soft part sarcoma chromosomal region candidate gene 1 protein homolog)
P16460	Ass1	ASSY_MOUSE	TB_24H-MOCK_24H	4.13893	1.9984e-14	3.09432e-12	no	4.13893	3.09432e-12	Argininosuccinate synthase (EC 6.3.4.5) (Citrulline--aspartate ligase)
Q8QZV7	Asun	ASUN_MOUSE	TB_24H-MOCK_24H	-0.328093	0.647205	0.840067	no	-0.328093	0.840067	Protein asunder homolog (Cell cycle regulator Mat89Bb homolog) (Spermatogenesis-associated protein 30)
Q9D5T0	Atad1	ATAD1_MOUSE	TB_24H-MOCK_24H	-0.133181	0.418309	0.697962	no	-0.133181	0.697962	ATPase family AAA domain-containing protein 1 (EC 3.6.1.3) (Thorase)
Q8CDM1	Atad2	ATAD2_MOUSE	TB_24H-MOCK_24H	#NUM!		0	yes	-3.52692	0.0108889	ATPase family AAA domain-containing protein 2 (EC 3.6.1.3)
Q925I1	Atad3	ATAD3_MOUSE	TB_24H-MOCK_24H	-0.211271	0.321151	0.606723	no	-0.211271	0.606723	ATPase family AAA domain-containing protein 3 (AAA-ATPase TOB3)
Q9Z2A5	Ate1	ATE1_MOUSE	TB_24H-MOCK_24H	-0.387194	0.0700694	0.241546	no	-0.387194	0.241546	Arginyl-tRNA--protein transferase 1 (Arginyltransferase 1) (R-transferase 1) (EC 2.3.2.8) (Arginine-tRNA--protein transferase 1)
Q60765	Atf3	ATF3_MOUSE	TB_24H-MOCK_24H	0.483754	0.186298	0.452577	no	0.483754	0.452577	Cyclic AMP-dependent transcription factor ATF-3 (cAMP-dependent transcription factor ATF-3) (Activating transcription factor 3) (Transcription factor LRG-21)
Q8C0J2	Atg16l1	A16L1_MOUSE	TB_24H-MOCK_24H	0.350954	0.276931	0.561333	no	0.350954	0.561333	Autophagy-related protein 16-1 (APG16-like 1)
Q6KAU8	Atg16l2	A16L2_MOUSE	TB_24H-MOCK_24H	-0.119361	0.728296	0.882087	no	-0.119361	0.882087	Autophagy-related protein 16-2 (APG16-like 2)
Q9CPX6	Atg3	ATG3_MOUSE	TB_24H-MOCK_24H	-0.157902	0.292465	0.576075	no	-0.157902	0.576075	Ubiquitin-like-conjugating enzyme ATG3 (EC 6.3.2.-) (Autophagy-related protein 3) (APG3-like)
Q8BGE6	Atg4b	ATG4B_MOUSE	TB_24H-MOCK_24H	-0.664242	0.0296775	0.134051	no	-0.664242	0.134051	Cysteine protease ATG4B (EC 3.4.22.-) (AUT-like 1 cysteine endopeptidase) (Autophagin-1) (Autophagy-related cysteine endopeptidase 1) (Autophagy-related protein 4 homolog B)
Q99J83	Atg5	ATG5_MOUSE	TB_24H-MOCK_24H	-0.374147	0.059529	0.217188	no	-0.374147	0.217188	Autophagy protein 5 (APG5-like)
Q9D906	Atg7	ATG7_MOUSE	TB_24H-MOCK_24H	-0.0424763	0.766153	0.901726	no	-0.0424763	0.901726	Ubiquitin-like modifier-activating enzyme ATG7 (ATG12-activating enzyme E1 ATG7) (Autophagy-related protein 7) (APG7-like) (mAGP7) (Ubiquitin-activating enzyme E1-like protein)
Q9CWJ9	Atic	PUR9_MOUSE	TB_24H-MOCK_24H	-0.522152	1.06871e-06	2.90595e-05	no	-0.522152	2.90595e-05	Bifunctional purine biosynthesis protein PURH [Cleaved into: Bifunctional purine biosynthesis protein PURH, N-terminally processed] [Includes: Phosphoribosylaminoimidazolecarboxamide formyltransferase (EC 2.1.2.3) (5-aminoimidazole-4-carboxamide ribonucleotide formyltransferase) (AICAR transformylase); IMP cyclohydrolase (EC 3.5.4.10) (ATIC) (IMP synthase) (Inosinicase)]
Q6PA06	Atl2	ATLA2_MOUSE	TB_24H-MOCK_24H	0.0496517	0.854953	0.941532	no	0.0496517	0.941532	Atlastin-2 (EC 3.6.5.-) (ADP-ribosylation factor-like protein 6-interacting protein 2) (ARL-6-interacting protein 2) (Aip-2)
Q91YH5	Atl3	ATLA3_MOUSE	TB_24H-MOCK_24H	-0.116723	0.654109	0.843558	no	-0.116723	0.843558	Atlastin-3 (EC 3.6.5.-)
O08997	Atox1	ATOX1_MOUSE	TB_24H-MOCK_24H	-0.00935644	0.966161	0.987691	no	-0.00935644	0.987691	Copper transport protein ATOX1 (Metal transport protein ATX1)
Q9EPE9	Atp13a1	AT131_MOUSE	TB_24H-MOCK_24H	-0.06074	0.746067	0.890851	no	-0.06074	0.890851	Manganese-transporting ATPase 13A1 (CATP) (EC 3.6.3.-)
Q9CTG6	Atp13a2	AT132_MOUSE	TB_24H-MOCK_24H	0.108082	0.794149	0.914542	no	0.108082	0.914542	Probable cation-transporting ATPase 13A2 (EC 3.6.3.-)
Q8VDN2	Atp1a1	AT1A1_MOUSE	TB_24H-MOCK_24H	0.062323	0.566736	0.798339	no	0.062323	0.798339	Sodium/potassium-transporting ATPase subunit alpha-1 (Na(+)/K(+) ATPase alpha-1 subunit) (EC 3.6.3.9) (Sodium pump subunit alpha-1)
Q6PIC6	Atp1a3	AT1A3_MOUSE	TB_24H-MOCK_24H	0.439941	0.030957	0.138537	no	0.439941	0.138537	Sodium/potassium-transporting ATPase subunit alpha-3 (Na(+)/K(+) ATPase alpha-3 subunit) (EC 3.6.3.9) (Na(+)/K(+) ATPase alpha(III) subunit) (Sodium pump subunit alpha-3)
P97370	Atp1b3	AT1B3_MOUSE	TB_24H-MOCK_24H	-0.0374136	0.855197	0.941532	no	-0.0374136	0.941532	Sodium/potassium-transporting ATPase subunit beta-3 (Sodium/potassium-dependent ATPase subunit beta-3) (ATPB-3) (CD antigen CD298)
O55143	Atp2a2	AT2A2_MOUSE	TB_24H-MOCK_24H	-0.152847	0.217874	0.487847	no	-0.152847	0.487847	Sarcoplasmic/endoplasmic reticulum calcium ATPase 2 (SERCA2) (SR Ca(2+)-ATPase 2) (EC 3.6.3.8) (Calcium pump 2) (Calcium-transporting ATPase sarcoplasmic reticulum type, slow twitch skeletal muscle isoform) (Endoplasmic reticulum class 1/2 Ca(2+) ATPase)
Q64518	Atp2a3	AT2A3_MOUSE	TB_24H-MOCK_24H	0.273692	0.203307	0.472512	no	0.273692	0.472512	Sarcoplasmic/endoplasmic reticulum calcium ATPase 3 (SERCA3) (SR Ca(2+)-ATPase 3) (EC 3.6.3.8) (Calcium pump 3)
G5E829	Atp2b1	AT2B1_MOUSE	TB_24H-MOCK_24H	0.0626546	0.51416	0.772261	no	0.0626546	0.772261	Plasma membrane calcium-transporting ATPase 1 (PMCA1) (EC 3.6.3.8) (Plasma membrane calcium ATPase isoform 1) (Plasma membrane calcium pump isoform 1)
Q03265	Atp5a1	ATPA_MOUSE	TB_24H-MOCK_24H	0.0983409	0.052762	0.198553	no	0.0983409	0.198553	ATP synthase subunit alpha, mitochondrial
P56480	Atp5b	ATPB_MOUSE	TB_24H-MOCK_24H	0.0959746	0.196325	0.464941	no	0.0959746	0.464941	ATP synthase subunit beta, mitochondrial (EC 3.6.3.14)
Q91VR2	Atp5c1	ATPG_MOUSE	TB_24H-MOCK_24H	0.10035	0.396163	0.67658	no	0.10035	0.67658	ATP synthase subunit gamma, mitochondrial (F-ATPase gamma subunit)
Q9D3D9	Atp5d	ATPD_MOUSE	TB_24H-MOCK_24H	0.0724106	0.655341	0.84364	no	0.0724106	0.84364	ATP synthase subunit delta, mitochondrial (F-ATPase delta subunit)
P56382	Atp5e	ATP5E_MOUSE	TB_24H-MOCK_24H	0.0100542	0.939572	0.976589	no	0.0100542	0.976589	ATP synthase subunit epsilon, mitochondrial (ATPase subunit epsilon)
Q9CQQ7	Atp5f1	AT5F1_MOUSE	TB_24H-MOCK_24H	0.0441439	0.614701	0.825088	no	0.0441439	0.825088	ATP synthase F(0) complex subunit B1, mitochondrial (ATP synthase subunit b) (ATPase subunit b)
Q9DCX2	Atp5h	ATP5H_MOUSE	TB_24H-MOCK_24H	0.256705	0.127773	0.36223	no	0.256705	0.36223	ATP synthase subunit d, mitochondrial (ATPase subunit d)
Q06185	Atp5i	ATP5I_MOUSE	TB_24H-MOCK_24H	0.184063	0.142432	0.388806	no	0.184063	0.388806	ATP synthase subunit e, mitochondrial (ATPase subunit e)
P56135	Atp5j2	ATPK_MOUSE	TB_24H-MOCK_24H	-0.348659	0.0320703	0.141405	no	-0.348659	0.141405	ATP synthase subunit f, mitochondrial
Q9CPQ8	Atp5l	ATP5L_MOUSE	TB_24H-MOCK_24H	-0.11991	0.40082	0.679997	no	-0.11991	0.679997	ATP synthase subunit g, mitochondrial (ATPase subunit g)
Q9DB20	Atp5o	ATPO_MOUSE	TB_24H-MOCK_24H	0.0626248	0.403653	0.681142	no	0.0626248	0.681142	ATP synthase subunit O, mitochondrial (Oligomycin sensitivity conferral protein) (OSCP)
Q9R1Q9	Atp6ap1	VAS1_MOUSE	TB_24H-MOCK_24H	0.496631	0.199985	0.469461	no	0.496631	0.469461	V-type proton ATPase subunit S1 (V-ATPase subunit S1) (Protein C7-1) (V-ATPase Ac45 subunit) (V-ATPase S1 accessory protein) (Vacuolar proton pump subunit S1)
Q9CYN9	Atp6ap2	RENR_MOUSE	TB_24H-MOCK_24H	-0.40927	0.271473	0.556018	no	-0.40927	0.556018	Renin receptor (ATPase H(+)-transporting lysosomal accessory protein 2) (ATPase H(+)-transporting lysosomal-interacting protein 2) (Renin/prorenin receptor)
Q9Z1G4	Atp6v0a1	VPP1_MOUSE	TB_24H-MOCK_24H	-0.0964099	0.325793	0.612566	no	-0.0964099	0.612566	V-type proton ATPase 116 kDa subunit a isoform 1 (V-ATPase 116 kDa isoform a1) (Clathrin-coated vesicle/synaptic vesicle proton pump 116 kDa subunit) (Vacuolar adenosine triphosphatase subunit Ac116) (Vacuolar proton pump subunit 1) (Vacuolar proton translocating ATPase 116 kDa subunit a isoform 1)
P63082	Atp6v0c	VATL_MOUSE	TB_24H-MOCK_24H	0.0922935	0.708039	0.872317	no	0.0922935	0.872317	V-type proton ATPase 16 kDa proteolipid subunit (V-ATPase 16 kDa proteolipid subunit) (PL16) (Vacuolar proton pump 16 kDa proteolipid subunit)
P51863	Atp6v0d1	VA0D1_MOUSE	TB_24H-MOCK_24H	0.104827	0.611534	0.822818	no	0.104827	0.822818	V-type proton ATPase subunit d 1 (V-ATPase subunit d 1) (P39) (Physophilin) (V-ATPase 40 kDa accessory protein) (V-ATPase AC39 subunit) (Vacuolar proton pump subunit d 1)
Q80SY3	Atp6v0d2	VA0D2_MOUSE	TB_24H-MOCK_24H	0.0859377	0.816442	0.923939	no	0.0859377	0.923939	V-type proton ATPase subunit d 2 (V-ATPase subunit d 2) (Osteoclast-specific vacuolar ATP synthase) (Vacuolar proton pump subunit d 2)
P50516	Atp6v1a	VATA_MOUSE	TB_24H-MOCK_24H	0.0107874	0.902276	0.958406	no	0.0107874	0.958406	V-type proton ATPase catalytic subunit A (V-ATPase subunit A) (EC 3.6.3.14) (V-ATPase 69 kDa subunit) (Vacuolar proton pump subunit alpha)
P62814	Atp6v1b2	VATB2_MOUSE	TB_24H-MOCK_24H	0.13257	0.0874708	0.279142	no	0.13257	0.279142	V-type proton ATPase subunit B, brain isoform (V-ATPase subunit B 2) (Endomembrane proton pump 58 kDa subunit) (Vacuolar proton pump subunit B 2)
Q9Z1G3	Atp6v1c1	VATC1_MOUSE	TB_24H-MOCK_24H	-0.0446944	0.718483	0.877891	no	-0.0446944	0.877891	V-type proton ATPase subunit C 1 (V-ATPase subunit C 1) (Vacuolar proton pump subunit C 1)
P57746	Atp6v1d	VATD_MOUSE	TB_24H-MOCK_24H	0.116355	0.105413	0.320295	no	0.116355	0.320295	V-type proton ATPase subunit D (V-ATPase subunit D) (V-ATPase 28 kDa accessory protein) (Vacuolar proton pump subunit D)
P50518	Atp6v1e1	VATE1_MOUSE	TB_24H-MOCK_24H	0.222875	0.210077	0.480052	no	0.222875	0.480052	V-type proton ATPase subunit E 1 (V-ATPase subunit E 1) (V-ATPase 31 kDa subunit) (p31) (Vacuolar proton pump subunit E 1)
Q9D1K2	Atp6v1f	VATF_MOUSE	TB_24H-MOCK_24H	-0.20662	0.177839	0.439882	no	-0.20662	0.439882	V-type proton ATPase subunit F (V-ATPase subunit F) (V-ATPase 14 kDa subunit) (Vacuolar proton pump subunit F)
Q9CR51	Atp6v1g1	VATG1_MOUSE	TB_24H-MOCK_24H	0.0920939	0.773496	0.904915	no	0.0920939	0.904915	V-type proton ATPase subunit G 1 (V-ATPase subunit G 1) (V-ATPase 13 kDa subunit 1) (Vacuolar proton pump subunit G 1)
Q8BVE3	Atp6v1h	VATH_MOUSE	TB_24H-MOCK_24H	0.0140467	0.904889	0.95935	no	0.0140467	0.95935	V-type proton ATPase subunit H (V-ATPase subunit H) (Vacuolar proton pump subunit H)
P98195	Atp9b	ATP9B_MOUSE	TB_24H-MOCK_24H	0.0989945	0.688762	0.860897	no	0.0989945	0.860897	Probable phospholipid-transporting ATPase IIB (EC 3.6.3.1) (ATPase class II type 9B)
O35143	Atpif1	ATIF1_MOUSE	TB_24H-MOCK_24H	0.218907	0.745975	0.890851	no	0.218907	0.890851	ATPase inhibitor, mitochondrial (Inhibitor of F(1)F(o)-ATPase) (IF(1)) (IF1)
Q61687	Atrx	ATRX_MOUSE	TB_24H-MOCK_24H	-0.832183	0.0164463	0.0880546	no	-0.832183	0.0880546	Transcriptional regulator ATRX (EC 3.6.4.12) (ATP-dependent helicase ATRX) (HP1 alpha-interacting protein) (HP1-BP38 protein) (Heterochromatin protein 2) (X-linked nuclear protein)
P28658	Atxn10	ATX10_MOUSE	TB_24H-MOCK_24H	-1.63044	1.60994e-05	0.000319593	no	-1.63044	0.000319593	Ataxin-10 (Brain protein E46) (Spinocerebellar ataxia type 10 protein homolog)
O70305	Atxn2	ATX2_MOUSE	TB_24H-MOCK_24H	0.216512	0.638964	0.83692	no	0.216512	0.83692	Ataxin-2 (Spinocerebellar ataxia type 2 protein homolog)
Q7TQH0	Atxn2l	ATX2L_MOUSE	TB_24H-MOCK_24H	-0.0539423	0.684427	0.857971	no	-0.0539423	0.857971	Ataxin-2-like protein
Q9CVD2	Atxn3	ATX3_MOUSE	TB_24H-MOCK_24H	-0.732991	0.000142621	0.00201491	no	-0.732991	0.00201491	Ataxin-3 (EC 3.4.19.12) (Machado-Joseph disease protein 1 homolog)
Q9JLZ3	Auh	AUHM_MOUSE	TB_24H-MOCK_24H	-0.234877	0.430512	0.708265	no	-0.234877	0.708265	Methylglutaconyl-CoA hydratase, mitochondrial (EC 4.2.1.18) (AU-specific RNA-binding enoyl-CoA hydratase) (AU-binding enoyl-CoA hydratase) (muAUH)
P70295	Aup1	AUP1_MOUSE	TB_24H-MOCK_24H	-0.00243918	0.993041	0.996904	no	-0.00243918	0.996904	Ancient ubiquitous protein 1
P01887	B2m	B2MG_MOUSE	TB_24H-MOCK_24H	1.45466	1.98454e-07	6.79838e-06	no	1.45466	6.79838e-06	Beta-2-microglobulin
Q9Z222	B3GNT2	B3GN2_MOUSE	TB_24H-MOCK_24H	-0.563394	0.0928032	0.289944	no	-0.563394	0.289944	N-acetyllactosaminide beta-1,3-N-acetylglucosaminyltransferase 2 (EC 2.4.1.149) (Beta-1,3-N-acetylglucosaminyltransferase 1) (BGnT-1) (Beta-1,3-Gn-T1) (Beta3Gn-T1) (Beta-1,3-galactosyltransferase 7) (Beta-1,3-GalTase 7) (Beta3Gal-T7) (Beta3GalT7) (b3Gal-T7) (Beta-3-Gx-T7) (UDP-Gal:beta-GlcNAc beta-1,3-galactosyltransferase 7) (UDP-GlcNAc:betaGal beta-1,3-N-acetylglucosaminyltransferase 2) (BGnT-2…
P15535	B4galt1	B4GT1_MOUSE	TB_24H-MOCK_24H	0.200556	0.550173	0.788785	no	0.200556	0.788785	Beta-1,4-galactosyltransferase 1 (Beta-1,4-GalTase 1) (Beta4Gal-T1) (b4Gal-T1) (EC 2.4.1.-) (UDP-Gal:beta-GlcNAc beta-1,4-galactosyltransferase 1) (UDP-galactose:beta-N-acetylglucosamine beta-1,4-galactosyltransferase 1) [Cleaved into: Processed beta-1,4-galactosyltransferase 1] [Includes: Lactose synthase A protein (EC 2.4.1.22); N-acetyllactosamine synthase (EC 2.4.1.90) (Nal synthase); Beta-N-…
Q3UI43	Babam1	BABA1_MOUSE	TB_24H-MOCK_24H	-0.133889	0.403359	0.680944	no	-0.133889	0.680944	BRISC and BRCA1-A complex member 1 (Mediator of RAP80 interactions and targeting subunit of 40 kDa) (New component of the BRCA1-A complex)
Q61337	Bad	BAD_MOUSE	TB_24H-MOCK_24H	-0.186634	0.678219	0.854959	no	-0.186634	0.854959	Bcl2-associated agonist of cell death (BAD) (Bcl-2-binding component 6) (Bcl-xL/Bcl-2-associated death promoter) (Bcl2 antagonist of cell death)
Q60739	Bag1	BAG1_MOUSE	TB_24H-MOCK_24H	-0.0154794	0.966258	0.987691	no	-0.0154794	0.987691	BAG family molecular chaperone regulator 1 (BAG-1) (Bcl-2-associated athanogene 1)
Q9JLV1	Bag3	BAG3_MOUSE	TB_24H-MOCK_24H	0.00167834	0.996601	0.998923	no	0.00167834	0.998923	BAG family molecular chaperone regulator 3 (BAG-3) (Bcl-2-associated athanogene 3) (Bcl-2-binding protein Bis)
Q8CI32	Bag5	BAG5_MOUSE	TB_24H-MOCK_24H	-0.226876	0.519627	0.772752	no	-0.226876	0.772752	BAG family molecular chaperone regulator 5 (BAG-5) (Bcl-2-associated athanogene 5)
Q9Z1R2	Bag6	BAG6_MOUSE	TB_24H-MOCK_24H	-0.369271	0.0470475	0.184097	no	-0.369271	0.184097	Large proline-rich protein BAG6 (BAG family molecular chaperone regulator 6) (BCL2-associated athanogene 6) (BAG-6) (BAG6) (HLA-B-associated transcript 3) (Protein Scythe)
Q8BKX1	Baiap2	BAIP2_MOUSE	TB_24H-MOCK_24H	-0.494243	0.0550209	0.204794	no	-0.494243	0.204794	Brain-specific angiogenesis inhibitor 1-associated protein 2 (BAI-associated protein 2) (BAI1-associated protein 2) (Insulin receptor substrate protein of 53 kDa) (IRSp53) (Insulin receptor substrate p53) (Insulin receptor tyrosine kinase 53 kDa substrate)
O08734	Bak1	BAK_MOUSE	TB_24H-MOCK_24H	0.23978	0.138609	0.38298	no	0.23978	0.38298	Bcl-2 homologous antagonist/killer (Apoptosis regulator BAK)
O54962	Banf1	BAF_MOUSE	TB_24H-MOCK_24H	-0.153804	0.569376	0.800599	no	-0.153804	0.800599	Barrier-to-autointegration factor (Breakpoint cluster region protein 1) (LAP2-binding protein 1) [Cleaved into: Barrier-to-autointegration factor, N-terminally processed]
Q91XV3	Basp1	BASP1_MOUSE	TB_24H-MOCK_24H	0.11674	0.795639	0.914542	no	0.11674	0.914542	Brain acid soluble protein 1 (22 kDa neuronal tissue-enriched acidic protein) (Neuronal axonal membrane protein NAP-22)
Q07813	Bax	BAX_MOUSE	TB_24H-MOCK_24H	-0.195871	0.121826	0.353251	no	-0.195871	0.353251	Apoptosis regulator BAX
Q9Z277	Baz1b	BAZ1B_MOUSE	TB_24H-MOCK_24H	-0.400064	0.114226	0.339346	no	-0.400064	0.339346	Tyrosine-protein kinase BAZ1B (EC 2.7.10.2) (Bromodomain adjacent to zinc finger domain protein 1B) (Williams syndrome transcription factor homolog) (Williams-Beuren syndrome chromosomal region 9 protein homolog)
Q99ML1	Bbc3	BBC3_MOUSE	TB_24H-MOCK_24H	-1.42461	0.00257533	0.0214851	no	-1.42461	0.0214851	Bcl-2-binding component 3 (p53 up-regulated modulator of apoptosis)
Q61334	Bcap29	BAP29_MOUSE	TB_24H-MOCK_24H	-0.712609	0.0707909	0.243161	no	-0.712609	0.243161	B-cell receptor-associated protein 29 (BCR-associated protein 29) (Bap29)
Q61335	Bcap31	BAP31_MOUSE	TB_24H-MOCK_24H	0.222103	0.289326	0.572587	no	0.222103	0.572587	B-cell receptor-associated protein 31 (BCR-associated protein 31) (Bap31) (p28)
Q9D287	Bcas2	SPF27_MOUSE	TB_24H-MOCK_24H	-0.368355	0.117703	0.346235	no	-0.368355	0.346235	Pre-mRNA-splicing factor SPF27 (Breast carcinoma-amplified sequence 2 homolog) (DNA amplified in mammary carcinoma 1 protein)
Q8CCN5	Bcas3	BCAS3_MOUSE	TB_24H-MOCK_24H	-0.164414	0.336359	0.623331	no	-0.164414	0.623331	Breast carcinoma-amplified sequence 3 homolog (K20D4) (Protein rudhira)
O35855	Bcat2	BCAT2_MOUSE	TB_24H-MOCK_24H	0.219784	0.0761013	0.257058	no	0.219784	0.257058	Branched-chain-amino-acid aminotransferase, mitochondrial (BCAT(m)) (EC 2.6.1.42)
Q9CWI3	Bccip	BCCIP_MOUSE	TB_24H-MOCK_24H	-0.348006	0.339205	0.626163	no	-0.348006	0.626163	BRCA2 and CDKN1A-interacting protein
O55028	Bckdk	BCKD_MOUSE	TB_24H-MOCK_24H	-1.1522	0.000251342	0.00329812	no	-1.1522	0.00329812	[3-methyl-2-oxobutanoate dehydrogenase [lipoamide]] kinase, mitochondrial (EC 2.7.11.4) (Branched-chain alpha-ketoacid dehydrogenase kinase) (BCKD-kinase) (BCKDHKIN)
Q64373	Bcl2l1	B2CL1_MOUSE	TB_24H-MOCK_24H	-0.285161	0.231492	0.507589	no	-0.285161	0.507589	Bcl-2-like protein 1 (Bcl2-L-1) (Apoptosis regulator Bcl-X)
P59017	Bcl2l13	B2L13_MOUSE	TB_24H-MOCK_24H	0.134457	0.524294	0.77482	no	0.134457	0.77482	Bcl-2-like protein 13 (Bcl2-L-13) (Bcl-rambo) (Protein Mil1)
Q8K019	Bclaf1	BCLF1_MOUSE	TB_24H-MOCK_24H	-0.0766012	0.611247	0.822718	no	-0.0766012	0.822718	Bcl-2-associated transcription factor 1 (Btf)
O88597	Becn1	BECN1_MOUSE	TB_24H-MOCK_24H	0.117929	0.687606	0.860492	no	0.117929	0.860492	Beclin-1 (Coiled-coil myosin-like BCL2-interacting protein) [Cleaved into: Beclin-1-C 35 kDa; Beclin-1-C 37 kDa]
Q921C5	Bicd2	BICD2_MOUSE	TB_24H-MOCK_24H	-0.172523	0.467008	0.739908	no	-0.172523	0.739908	Protein bicaudal D homolog 2 (Bic-D 2)
P70444	Bid	BID_MOUSE	TB_24H-MOCK_24H	0.053528	0.758637	0.896971	no	0.053528	0.896971	BH3-interacting domain death agonist (p22 BID) (BID) [Cleaved into: BH3-interacting domain death agonist p15 (p15 BID); BH3-interacting domain death agonist p13 (p13 BID); BH3-interacting domain death agonist p11 (p11 BID)]
O08539	Bin1	BIN1_MOUSE	TB_24H-MOCK_24H	-0.228447	0.329202	0.616231	no	-0.228447	0.616231	Myc box-dependent-interacting protein 1 (Amphiphysin II) (Amphiphysin-like protein) (Bridging integrator 1) (SH3 domain-containing protein 9)
D3Z6Q9	Bin2	BIN2_MOUSE	TB_24H-MOCK_24H	-0.6382	0.000375956	0.00449175	no	-0.6382	0.00449175	Bridging integrator 2
O88738	Birc6	BIRC6_MOUSE	TB_24H-MOCK_24H	-0.660495	0.00151091	0.0141274	no	-0.660495	0.0141274	Baculoviral IAP repeat-containing protein 6 (EC 2.3.2.27) (BIR repeat-containing ubiquitin-conjugating enzyme) (BRUCE) (RING-type E3 ubiquitin transferase BIRC6) (Ubiquitin-conjugating BIR domain enzyme apollon) (APOLLON)
Q8R016	Blmh	BLMH_MOUSE	TB_24H-MOCK_24H	-0.201738	0.424412	0.704238	no	-0.201738	0.704238	Bleomycin hydrolase (BH) (BLM hydrolase) (BMH) (EC 3.4.22.40)
O55102	Bloc1s1	BL1S1_MOUSE	TB_24H-MOCK_24H	0.0962988	0.670859	0.851048	no	0.0962988	0.851048	Biogenesis of lysosome-related organelles complex 1 subunit 1 (BLOC-1 subunit 1) (GCN5-like protein 1)
Q9CWG9	Bloc1s2	BL1S2_MOUSE	TB_24H-MOCK_24H	-0.0318598	0.869248	0.945926	no	-0.0318598	0.945926	Biogenesis of lysosome-related organelles complex 1 subunit 2 (BLOC-1 subunit 2)
Q8R015	Bloc1s5	BL1S5_MOUSE	TB_24H-MOCK_24H	0.0106062	0.958362	0.984013	no	0.0106062	0.984013	Biogenesis of lysosome-related organelles complex 1 subunit 5 (BLOC-1 subunit 5) (Protein Muted homolog)
Q9R0C0	Bloc1s6	BL1S6_MOUSE	TB_24H-MOCK_24H	-0.378214	0.167154	0.423742	no	-0.378214	0.423742	Biogenesis of lysosome-related organelles complex 1 subunit 6 (BLOC-1 subunit 6) (Pallid protein) (Pallidin) (Syntaxin 13-interacting protein)
Q9CY64	Blvra	BIEA_MOUSE	TB_24H-MOCK_24H	-0.0869353	0.320953	0.606646	no	-0.0869353	0.606646	Biliverdin reductase A (BVR A) (EC 1.3.1.24) (Biliverdin-IX alpha-reductase)
Q923D2	Blvrb	BLVRB_MOUSE	TB_24H-MOCK_24H	-0.0315021	0.631562	0.834363	no	-0.0315021	0.834363	Flavin reductase (NADPH) (FR) (EC 1.5.1.30) (Biliverdin reductase B) (BVR-B) (EC 1.3.1.24) (Biliverdin-IX beta-reductase) (NADPH-dependent diaphorase) (NADPH-flavin reductase) (FLR)
Q91Z96	Bmp2k	BMP2K_MOUSE	TB_24H-MOCK_24H	0.284166	0.0543198	0.202769	no	0.284166	0.202769	BMP-2-inducible protein kinase (BIKe) (EC 2.7.11.1)
O54940	Bnip2	BNIP2_MOUSE	TB_24H-MOCK_24H	0.258719	0.320189	0.605793	no	0.258719	0.605793	BCL2/adenovirus E1B 19 kDa protein-interacting protein 2
E9Q6J5	Bod1l	BD1L1_MOUSE	TB_24H-MOCK_24H	-0.0708137	0.826187	0.92776	no	-0.0708137	0.92776	Biorientation of chromosomes in cell division protein 1-like 1
Q8BGS2	Bola2	BOLA2_MOUSE	TB_24H-MOCK_24H	-0.321879	0.308485	0.595472	no	-0.321879	0.595472	BolA-like protein 2
P97452	Bop1	BOP1_MOUSE	TB_24H-MOCK_24H	-1.16411	0.000978666	0.00989142	no	-1.16411	0.00989142	Ribosome biogenesis protein BOP1 (Block of proliferation 1 protein)
Q9D6W8	Borcs6	BORC6_MOUSE	TB_24H-MOCK_24H	0.386501	0.401753	0.680206	no	0.386501	0.680206	BLOC-1-related complex subunit 6
Q8R164	Bphl	BPHL_MOUSE	TB_24H-MOCK_24H	0.0370707	0.852368	0.939766	no	0.0370707	0.939766	Valacyclovir hydrolase (VACVase) (Valacyclovirase) (EC 3.1.-.-) (Biphenyl hydrolase-like protein)
Q9Z0S1	Bpnt1	BPNT1_MOUSE	TB_24H-MOCK_24H	-0.34995	0.00228241	0.0198099	no	-0.34995	0.0198099	3'(2'),5'-bisphosphate nucleotidase 1 (EC 3.1.3.7) (Bisphosphate 3'-nucleotidase 1) (PAP-inositol 1,4-phosphatase) (PIP)
P46737	Brcc3	BRCC3_MOUSE	TB_24H-MOCK_24H	0.00833592	0.983291	0.992839	no	0.00833592	0.992839	Lys-63-specific deubiquitinase BRCC36 (EC 3.4.19.-) (BRCA1-A complex subunit BRCC36) (BRCA1/BRCA2-containing complex subunit 3) (BRCA1/BRCA2-containing complex subunit 36) (BRISC complex subunit BRCC36)
Q7JJ13	Brd2	BRD2_MOUSE	TB_24H-MOCK_24H	0.0734754	0.790057	0.91184	no	0.0734754	0.91184	Bromodomain-containing protein 2 (Female sterile homeotic-related protein 1) (Fsrg-1) (Protein RING3)
Q9ESU6	Brd4	BRD4_MOUSE	TB_24H-MOCK_24H	-0.140708	0.564249	0.796719	no	-0.140708	0.796719	Bromodomain-containing protein 4 (Mitotic chromosome-associated protein) (MCAP)
Q8K3W0	Bre	BRE_MOUSE	TB_24H-MOCK_24H	-0.0776104	0.325888	0.612566	no	-0.0776104	0.612566	BRCA1-A complex subunit BRE (BRCA1/BRCA2-containing complex subunit 45) (Brain and reproductive organ-expressed protein)
Q9DCA5	Brix1	BRX1_MOUSE	TB_24H-MOCK_24H	-0.780591	0.060093	0.218013	no	-0.780591	0.218013	Ribosome biogenesis protein BRX1 homolog (Brix domain-containing protein 2)
Q91VR8	Brk1	BRK1_MOUSE	TB_24H-MOCK_24H	-0.520692	0.0166745	0.0888958	no	-0.520692	0.0888958	Protein BRICK1 (BRK1)
Q8K2Q7	Brox	BROX_MOUSE	TB_24H-MOCK_24H	-0.10797	0.616182	0.825147	no	-0.10797	0.825147	BRO1 domain-containing protein BROX (BRO1 domain- and CAAX motif-containing protein)
P18572	Bsg	BASI_MOUSE	TB_24H-MOCK_24H	0.831246	0.00763531	0.0494916	no	0.831246	0.0494916	Basigin (Basic immunoglobulin superfamily) (HT7 antigen) (Membrane glycoprotein gp42) (CD antigen CD147)
Q8R2Q8	Bst2	BST2_MOUSE	TB_24H-MOCK_24H	2.65993	6.24389e-13	7.79681e-11	no	2.65993	7.79681e-11	Bone marrow stromal antigen 2 (BST-2) (HM1.24 antigen) (CD antigen CD317)
Q64152	Btf3	BTF3_MOUSE	TB_24H-MOCK_24H	-0.185596	0.734748	0.884074	no	-0.185596	0.884074	Transcription factor BTF3 (Nascent polypeptide-associated complex subunit beta) (NAC-beta) (RNA polymerase B transcription factor 3)
Q9CQH7	Btf3l4	BT3L4_MOUSE	TB_24H-MOCK_24H	0.344982	0.505272	0.766538	no	0.344982	0.766538	Transcription factor BTF3 homolog 4 (Basic transcription factor 3-like 4)
P35991	Btk	BTK_MOUSE	TB_24H-MOCK_24H	-0.027378	0.893561	0.953865	no	-0.027378	0.953865	Tyrosine-protein kinase BTK (EC 2.7.10.2) (Agammaglobulinemia tyrosine kinase) (ATK) (B-cell progenitor kinase) (BPK) (Bruton tyrosine kinase) (Kinase EMB)
Q9WVA3	Bub3	BUB3_MOUSE	TB_24H-MOCK_24H	-0.434946	0.229687	0.505468	no	-0.434946	0.505468	Mitotic checkpoint protein BUB3 (WD repeat type I transmembrane protein A72.5)
Q6PGH1	Bud31	BUD31_MOUSE	TB_24H-MOCK_24H	-0.444689	0.162129	0.417179	no	-0.444689	0.417179	Protein BUD31 homolog (Protein G10 homolog)
Q9CQC6	Bzw1	BZW1_MOUSE	TB_24H-MOCK_24H	-0.141227	0.395399	0.676279	no	-0.141227	0.676279	Basic leucine zipper and W2 domain-containing protein 1
Q91VK1	Bzw2	BZW2_MOUSE	TB_24H-MOCK_24H	-0.677259	0.0669992	0.234497	no	-0.677259	0.234497	Basic leucine zipper and W2 domain-containing protein 2
P98086	C1qa	C1QA_MOUSE	TB_24H-MOCK_24H	0.233729	0.533437	0.778986	no	0.233729	0.778986	Complement C1q subcomponent subunit A
P14106	C1qb	C1QB_MOUSE	TB_24H-MOCK_24H	-0.330532	0.138228	0.382472	no	-0.330532	0.382472	Complement C1q subcomponent subunit B
O35658	C1qbp	C1QBP_MOUSE	TB_24H-MOCK_24H	0.0816824	0.722578	0.879745	no	0.0816824	0.879745	Complement component 1 Q subcomponent-binding protein, mitochondrial (GC1q-R protein) (Glycoprotein gC1qBP) (C1qBP)
Q02105	C1qc	C1QC_MOUSE	TB_24H-MOCK_24H	-1.1656	6.79674e-10	4.53624e-08	no	-1.1656	4.53624e-08	Complement C1q subcomponent subunit C
Q80X80	C2cd2l	C2C2L_MOUSE	TB_24H-MOCK_24H	-0.0794083	0.711336	0.873322	no	-0.0794083	0.873322	C2 domain-containing protein 2-like (Transmembrane protein 24)
P01027	C3	CO3_MOUSE	TB_24H-MOCK_24H	2.11514	6.23379e-05	0.00104463	no	2.11514	0.00104463	Complement C3 (HSE-MSF) [Cleaved into: Complement C3 beta chain; C3-beta-c (C3bc); Complement C3 alpha chain; C3a anaphylatoxin; Acylation stimulating protein (ASP) (C3adesArg); Complement C3b alpha' chain; Complement C3c alpha' chain fragment 1; Complement C3dg fragment; Complement C3g fragment; Complement C3d fragment; Complement C3f fragment; Complement C3c alpha' chain fragment 2]
O09047	C3ar1	C3AR_MOUSE	TB_24H-MOCK_24H	0.0626623	0.822394	0.926477	no	0.0626623	0.926477	C3a anaphylatoxin chemotactic receptor (C3AR) (C3a-R) (Complement component 3a receptor 1)
P30993	C5ar1	C5AR1_MOUSE	TB_24H-MOCK_24H	-1.39333	3.1332e-05	0.000583106	no	-1.39333	0.000583106	C5a anaphylatoxin chemotactic receptor 1 (C5a anaphylatoxin chemotactic receptor) (C5a-R) (C5aR) (CD antigen CD88)
Q9D6N1	Ca13	CAH13_MOUSE	TB_24H-MOCK_24H	3.06298	0.000176836	0.00242788	no	3.06298	0.00242788	Carbonic anhydrase 13 (EC 4.2.1.1) (Carbonate dehydratase XIII) (Carbonic anhydrase XIII) (CA-XIII)
Q06138	Cab39	CAB39_MOUSE	TB_24H-MOCK_24H	-0.0665239	0.810131	0.921296	no	-0.0665239	0.921296	Calcium-binding protein 39 (MO25alpha) (Protein Mo25)
Q8R0X2	Cacul1	CACL1_MOUSE	TB_24H-MOCK_24H	-0.35938	0.0578806	0.212869	no	-0.35938	0.212869	CDK2-associated and cullin domain-containing protein 1
Q9CXW3	Cacybp	CYBP_MOUSE	TB_24H-MOCK_24H	-0.0680111	0.80064	0.916342	no	-0.0680111	0.916342	Calcyclin-binding protein (CacyBP) (Siah-interacting protein)
B2RQC6	Cad	PYR1_MOUSE	TB_24H-MOCK_24H	-0.654964	0.000324941	0.0040106	no	-0.654964	0.0040106	CAD protein [Includes: Glutamine-dependent carbamoyl-phosphate synthase (EC 6.3.5.5); Aspartate carbamoyltransferase (EC 2.1.3.2); Dihydroorotase (EC 3.5.2.3)]
Q8R5M8	Cadm1	CADM1_MOUSE	TB_24H-MOCK_24H	-2.91885	2.22045e-16	5.73023e-14	no	-2.91885	5.73023e-14	Cell adhesion molecule 1 (Immunoglobulin superfamily member 4) (IgSF4) (Nectin-like protein 2) (NECL-2) (Spermatogenic immunoglobulin superfamily) (SgIgSF) (Synaptic cell adhesion molecule) (SynCAM) (Tumor suppressor in lung cancer 1) (TSLC-1)
P62204	Calm1; Calm2; Calm3	CALM_MOUSE	TB_24H-MOCK_24H	0.194338	0.850133	0.93878	no	0.194338	0.93878	Calmodulin (CaM)
P14211	Calr	CALR_MOUSE	TB_24H-MOCK_24H	0.164039	0.585879	0.808535	no	0.164039	0.808535	Calreticulin (CRP55) (Calregulin) (Endoplasmic reticulum resident protein 60) (ERp60) (HACBP)
O35887	Calu	CALU_MOUSE	TB_24H-MOCK_24H	-0.0479917	0.918294	0.966218	no	-0.0479917	0.966218	Calumenin (Crocalbin)
Q91YS8	Camk1	KCC1A_MOUSE	TB_24H-MOCK_24H	-0.288204	0.569581	0.800599	no	-0.288204	0.800599	Calcium/calmodulin-dependent protein kinase type 1 (EC 2.7.11.17) (CaM kinase I) (CaM-KI) (CaM kinase I alpha) (CaMKI-alpha)
Q8BW96	Camk1d	KCC1D_MOUSE	TB_24H-MOCK_24H	-0.84148	0.0110567	0.0662142	no	-0.84148	0.0662142	Calcium/calmodulin-dependent protein kinase type 1D (EC 2.7.11.17) (CaM kinase I delta) (CaM-KI delta) (CaMKI delta) (CaM kinase ID) (CaMKI-like protein kinase) (CKLiK) (mCKLiK)
Q6PHZ2	Camk2d	KCC2D_MOUSE	TB_24H-MOCK_24H	-0.0431701	0.824827	0.927361	no	-0.0431701	0.927361	Calcium/calmodulin-dependent protein kinase type II subunit delta (CaM kinase II subunit delta) (CaMK-II subunit delta) (EC 2.7.11.17)
Q923T9	Camk2g	KCC2G_MOUSE	TB_24H-MOCK_24H	-0.451589	0.150083	0.399938	no	-0.451589	0.399938	Calcium/calmodulin-dependent protein kinase type II subunit gamma (CaM kinase II subunit gamma) (CaMK-II subunit gamma) (EC 2.7.11.17)
Q8C078	Camkk2	KKCC2_MOUSE	TB_24H-MOCK_24H	-0.0433798	0.808725	0.921296	no	-0.0433798	0.921296	Calcium/calmodulin-dependent protein kinase kinase 2 (CaM-KK 2) (CaM-kinase kinase 2) (CaMKK 2) (EC 2.7.11.17) (Calcium/calmodulin-dependent protein kinase kinase beta) (CaM-KK beta) (CaM-kinase kinase beta) (CaMKK beta)
P49070	Camlg	CAMLG_MOUSE	TB_24H-MOCK_24H	0.367179	0.306271	0.592788	no	0.367179	0.592788	Calcium signal-modulating cyclophilin ligand (CAML)
Q6ZQ38	Cand1	CAND1_MOUSE	TB_24H-MOCK_24H	-0.200676	0.357118	0.646286	no	-0.200676	0.646286	Cullin-associated NEDD8-dissociated protein 1 (Cullin-associated and neddylation-dissociated protein 1) (p120 CAND1)
P35564	Canx	CALX_MOUSE	TB_24H-MOCK_24H	0.0166721	0.91004	0.961108	no	0.0166721	0.961108	Calnexin
P40124	Cap1	CAP1_MOUSE	TB_24H-MOCK_24H	-0.30017	0.00123415	0.0119735	no	-0.30017	0.0119735	Adenylyl cyclase-associated protein 1 (CAP 1)
P24452	Capg	CAPG_MOUSE	TB_24H-MOCK_24H	-0.0717097	0.71798	0.877581	no	-0.0717097	0.877581	Macrophage-capping protein (Actin regulatory protein CAP-G) (Actin-capping protein GCAP39) (Myc basic motif homolog 1)
O35350	Capn1	CAN1_MOUSE	TB_24H-MOCK_24H	0.0800629	0.370309	0.65751	no	0.0800629	0.65751	Calpain-1 catalytic subunit (EC 3.4.22.52) (Calcium-activated neutral proteinase 1) (CANP 1) (Calpain mu-type) (Calpain-1 large subunit) (Micromolar-calpain) (muCANP)
O08529	Capn2	CAN2_MOUSE	TB_24H-MOCK_24H	-0.184427	0.24726	0.528809	no	-0.184427	0.528809	Calpain-2 catalytic subunit (EC 3.4.22.53) (80 kDa M-calpain subunit) (CALP80) (Calcium-activated neutral proteinase 2) (CANP 2) (Calpain M-type) (Calpain-2 large subunit) (Millimolar-calpain) (M-calpain)
Q9R1S8	Capn7	CAN7_MOUSE	TB_24H-MOCK_24H	-0.712713	0.00191287	0.0171406	no	-0.712713	0.0171406	Calpain-7 (EC 3.4.22.-) (PalB homolog) (PalBH)
O88456	Capns1	CPNS1_MOUSE	TB_24H-MOCK_24H	-0.417035	0.0373056	0.156627	no	-0.417035	0.156627	Calpain small subunit 1 (CSS1) (Calcium-activated neutral proteinase small subunit) (CANP small subunit) (Calcium-dependent protease small subunit) (CDPS) (Calcium-dependent protease small subunit 1) (Calpain regulatory subunit)
Q60865	Caprin1	CAPR1_MOUSE	TB_24H-MOCK_24H	-0.609172	0.0791593	0.262801	no	-0.609172	0.262801	Caprin-1 (Cytoplasmic activation- and proliferation-associated protein 1) (GPI-anchored membrane protein 1) (GPI-anchored protein p137) (GPI-p137) (p137GPI) (Membrane component chromosome 11 surface marker 1) (RNA granule protein 105)
P47753	Capza1	CAZA1_MOUSE	TB_24H-MOCK_24H	-0.0399307	0.795316	0.914542	no	-0.0399307	0.914542	F-actin-capping protein subunit alpha-1 (CapZ alpha-1)
P47754	Capza2	CAZA2_MOUSE	TB_24H-MOCK_24H	0.206056	0.386835	0.669623	no	0.206056	0.669623	F-actin-capping protein subunit alpha-2 (CapZ alpha-2)
P47757	Capzb	CAPZB_MOUSE	TB_24H-MOCK_24H	-0.0685475	0.707894	0.872317	no	-0.0685475	0.872317	F-actin-capping protein subunit beta (CapZ beta)
Q9D1I2	Card19	CAR19_MOUSE	TB_24H-MOCK_24H	0.136484	0.650211	0.841233	no	0.136484	0.841233	Caspase recruitment domain-containing protein 19 (Bcl10-interacting CARD protein) (BinCARD)
A2AIV8	Card9	CARD9_MOUSE	TB_24H-MOCK_24H	-0.494702	0.054842	0.204522	no	-0.494702	0.204522	Caspase recruitment domain-containing protein 9
Q9WVG6	Carm1	CARM1_MOUSE	TB_24H-MOCK_24H	-0.263247	0.447728	0.726081	no	-0.263247	0.726081	Histone-arginine methyltransferase CARM1 (EC 2.1.1.319) (Coactivator-associated arginine methyltransferase 1) (Protein arginine N-methyltransferase 4)
Q9ER72	Cars	SYCC_MOUSE	TB_24H-MOCK_24H	0.139071	0.614892	0.825088	no	0.139071	0.825088	Cysteine--tRNA ligase, cytoplasmic (EC 6.1.1.16) (Cysteinyl-tRNA synthetase) (CysRS)
P29452	Casp1	CASP1_MOUSE	TB_24H-MOCK_24H	0.981158	1.06833e-06	2.90595e-05	no	0.981158	2.90595e-05	Caspase-1 (CASP-1) (EC 3.4.22.36) (Interleukin-1 beta convertase) (IL-1BC) (Interleukin-1 beta-converting enzyme) (ICE) (IL-1 beta-converting enzyme) (p45) [Cleaved into: Caspase-1 subunit p20; Caspase-1 subunit p10]
P70677	Casp3	CASP3_MOUSE	TB_24H-MOCK_24H	0.235751	0.589107	0.809836	no	0.235751	0.809836	Caspase-3 (CASP-3) (EC 3.4.22.56) (Apopain) (Cysteine protease CPP32) (CPP-32) (LICE) (Protein Yama) (SREBP cleavage activity 1) (SCA-1) [Cleaved into: Caspase-3 subunit p17; Caspase-3 subunit p12]
O08738	Casp6	CASP6_MOUSE	TB_24H-MOCK_24H	-0.652478	0.0236796	0.114867	no	-0.652478	0.114867	Caspase-6 (CASP-6) (EC 3.4.22.59) (Apoptotic protease Mch-2) [Cleaved into: Caspase-6 subunit p18; Caspase-6 subunit p11]
P97864	Casp7	CASP7_MOUSE	TB_24H-MOCK_24H	0.812214	0.0387979	0.161317	no	0.812214	0.161317	Caspase-7 (CASP-7) (EC 3.4.22.60) (Apoptotic protease Mch-3) (Cysteine protease LICE2) [Cleaved into: Caspase-7 subunit p20; Caspase-7 subunit p11]
O89110	Casp8	CASP8_MOUSE	TB_24H-MOCK_24H	0.783189	4.07177e-05	0.000729713	no	0.783189	0.000729713	Caspase-8 (CASP-8) (EC 3.4.22.61) [Cleaved into: Caspase-8 subunit p18; Caspase-8 subunit p10]
Q9WUF3	Casp8ap2	C8AP2_MOUSE	TB_24H-MOCK_24H	-0.00271525	0.995993	0.998831	no	-0.00271525	0.998831	CASP8-associated protein 2 (FLICE-associated huge protein)
P51125	Cast	ICAL_MOUSE	TB_24H-MOCK_24H	-0.0128886	0.981292	0.992839	no	-0.0128886	0.992839	Calpastatin (Calpain inhibitor)
P24270	Cat	CATA_MOUSE	TB_24H-MOCK_24H	-0.0694454	0.705999	0.872317	no	-0.0694454	0.872317	Catalase (EC 1.11.1.6)
Q08024	Cbfb	PEBB_MOUSE	TB_24H-MOCK_24H	-0.381414	0.432502	0.710015	no	-0.381414	0.710015	Core-binding factor subunit beta (CBF-beta) (Polyomavirus enhancer-binding protein 2 beta subunit) (PEA2-beta) (PEBP2-beta) (SL3-3 enhancer factor 1 subunit beta) (SL3/AKV core-binding factor beta subunit)
P22682	Cbl	CBL_MOUSE	TB_24H-MOCK_24H	-0.130025	0.58041	0.805004	no	-0.130025	0.805004	E3 ubiquitin-protein ligase CBL (EC 6.3.2.-) (Casitas B-lineage lymphoma proto-oncogene) (Proto-oncogene c-Cbl) (Signal transduction protein CBL)
Q3TTA7	Cblb	CBLB_MOUSE	TB_24H-MOCK_24H	0.43329	0.238152	0.517623	no	0.43329	0.517623	E3 ubiquitin-protein ligase CBL-B (EC 6.3.2.-) (Casitas B-lineage lymphoma proto-oncogene b) (SH3-binding protein CBL-B) (Signal transduction protein CBL-B)
P48758	Cbr1	CBR1_MOUSE	TB_24H-MOCK_24H	-0.109241	0.342951	0.630072	no	-0.109241	0.630072	Carbonyl reductase [NADPH] 1 (EC 1.1.1.184) (15-hydroxyprostaglandin dehydrogenase [NADP(+)]) (EC 1.1.1.197) (NADPH-dependent carbonyl reductase 1) (Prostaglandin 9-ketoreductase) (Prostaglandin-E(2) 9-reductase) (EC 1.1.1.189)
P08074	Cbr2	CBR2_MOUSE	TB_24H-MOCK_24H	0.325506	0.132167	0.370653	no	0.325506	0.370653	Carbonyl reductase [NADPH] 2 (EC 1.1.1.184) (Adipocyte protein P27) (AP27) (Lung carbonyl reductase) (LCR) (NADPH-dependent carbonyl reductase 2)
Q8K354	Cbr3	CBR3_MOUSE	TB_24H-MOCK_24H	-0.440169	8.79941e-05	0.00138466	no	-0.440169	0.00138466	Carbonyl reductase [NADPH] 3 (EC 1.1.1.184) (NADPH-dependent carbonyl reductase 3)
Q91VT4	Cbr4	CBR4_MOUSE	TB_24H-MOCK_24H	-0.16738	0.535042	0.780088	no	-0.16738	0.780088	Carbonyl reductase family member 4 (EC 1.-.-.-) (3-ketoacyl-[acyl-carrier-protein] reductase beta subunit) (KAR beta subunit) (3-oxoacyl-[acyl-carrier-protein] reductase) (EC 1.1.1.-) (Quinone reductase CBR4)
Q8VEH6	Cbwd1	CBWD1_MOUSE	TB_24H-MOCK_24H	0.243632	0.533388	0.778986	no	0.243632	0.778986	COBW domain-containing protein 1 (Cobalamin synthase W domain-containing protein 1)
P83917	Cbx1	CBX1_MOUSE	TB_24H-MOCK_24H	0.124077	0.720644	0.879431	no	0.124077	0.879431	Chromobox protein homolog 1 (Heterochromatin protein 1 homolog beta) (HP1 beta) (Heterochromatin protein p25) (M31) (Modifier 1 protein)
P23198	Cbx3	CBX3_MOUSE	TB_24H-MOCK_24H	-0.532011	0.0659106	0.231945	no	-0.532011	0.231945	Chromobox protein homolog 3 (Heterochromatin protein 1 homolog gamma) (HP1 gamma) (M32) (Modifier 2 protein)
Q61686	Cbx5	CBX5_MOUSE	TB_24H-MOCK_24H	-0.768533	0.00612602	0.0421204	no	-0.768533	0.0421204	Chromobox protein homolog 5 (Heterochromatin protein 1 homolog alpha) (HP1 alpha)
Q8K1A6	Cc2d1a	C2D1A_MOUSE	TB_24H-MOCK_24H	0.0453349	0.869012	0.945926	no	0.0453349	0.945926	Coiled-coil and C2 domain-containing protein 1A (Five prime repressor element under dual repression-binding protein 1) (FRE under dual repression-binding protein 1) (Freud-1)
Q8BRN9	Cc2d1b	C2D1B_MOUSE	TB_24H-MOCK_24H	-0.592633	0.196378	0.464941	no	-0.592633	0.464941	Coiled-coil and C2 domain-containing protein 1B (Five prime repressor element under dual repression-binding protein 2) (FRE under dual repression-binding protein 2) (Freud-2)
Q8CH18	Ccar1	CCAR1_MOUSE	TB_24H-MOCK_24H	-0.0692011	0.786457	0.910127	no	-0.0692011	0.910127	Cell division cycle and apoptosis regulator protein 1 (Cell cycle and apoptosis regulatory protein 1) (CARP-1)
Q8VDP4	Ccar2	CCAR2_MOUSE	TB_24H-MOCK_24H	-0.26359	0.203726	0.472512	no	-0.26359	0.472512	Cell cycle and apoptosis regulator protein 2 (Cell division cycle and apoptosis regulator protein 2)
Q8VE99	Ccdc115	CC115_MOUSE	TB_24H-MOCK_24H	-0.866171	0.00138454	0.0131685	no	-0.866171	0.0131685	Coiled-coil domain-containing protein 115 (Coiled-coil protein 1) (Ccp1)
Q8R344	Ccdc12	CCD12_MOUSE	TB_24H-MOCK_24H	-0.715377	0.2939	0.576336	no	-0.715377	0.576336	Coiled-coil domain-containing protein 12
Q9D8X2	Ccdc124	CC124_MOUSE	TB_24H-MOCK_24H	-0.282757	0.495171	0.760882	no	-0.282757	0.760882	Coiled-coil domain-containing protein 124
Q9JIG7	Ccdc22	CCD22_MOUSE	TB_24H-MOCK_24H	-0.35545	0.000792151	0.00826528	no	-0.35545	0.00826528	Coiled-coil domain-containing protein 22
Q9CR29	Ccdc43	CCD43_MOUSE	TB_24H-MOCK_24H	-0.00934089	0.983127	0.992839	no	-0.00934089	0.992839	Coiled-coil domain-containing protein 43
Q9D024	Ccdc47	CCD47_MOUSE	TB_24H-MOCK_24H	-0.0282052	0.809785	0.921296	no	-0.0282052	0.921296	Coiled-coil domain-containing protein 47 (Adipocyte-specific protein 4)
Q810U5	Ccdc50	CCD50_MOUSE	TB_24H-MOCK_24H	0.87209	0.205442	0.474502	no	0.87209	0.474502	Coiled-coil domain-containing protein 50 (Protein Ymer)
Q3URS9	Ccdc51	CCD51_MOUSE	TB_24H-MOCK_24H	0.22477	0.559148	0.793721	no	0.22477	0.793721	Coiled-coil domain-containing protein 51
Q9CR27	Ccdc53	CCD53_MOUSE	TB_24H-MOCK_24H	0.0814732	0.647156	0.840067	no	0.0814732	0.840067	WASH complex subunit CCDC53 (Coiled-coil domain-containing protein 53)
D3YZP9	Ccdc6	CCDC6_MOUSE	TB_24H-MOCK_24H	-0.152631	0.624439	0.830431	no	-0.152631	0.830431	Coiled-coil domain-containing protein 6
Q9JJ89	Ccdc86	CCD86_MOUSE	TB_24H-MOCK_24H	-0.423471	0.376348	0.662668	no	-0.423471	0.662668	Coiled-coil domain-containing protein 86 (Cytokine-induced protein with coiled-coil domain) (mCyclon)
Q5SNZ0	Ccdc88a	GRDN_MOUSE	TB_24H-MOCK_24H	-0.0112998	0.970714	0.989974	no	-0.0112998	0.989974	Girdin (Akt phosphorylation enhancer) (APE) (Coiled-coil domain-containing protein 88A) (G alpha-interacting vesicle-associated protein) (GIV) (Girders of actin filament) (Hook-related protein 1) (HkRP1)
Q4QRL3	Ccdc88b	CC88B_MOUSE	TB_24H-MOCK_24H	0.373413	0.0166974	0.0888958	no	0.373413	0.0888958	Coiled-coil domain-containing protein 88B (Gipie) (Hook-related protein 3) (HkRP3)
Q8VC31	Ccdc9	CCDC9_MOUSE	TB_24H-MOCK_24H	-0.014652	0.953331	0.981735	no	-0.014652	0.981735	Coiled-coil domain-containing protein 9
Q8C3X2	Ccdc90b	CC90B_MOUSE	TB_24H-MOCK_24H	-0.677078	0.0303662	0.136366	no	-0.677078	0.136366	Coiled-coil domain-containing protein 90B, mitochondrial
Q7TQK5	Ccdc93	CCD93_MOUSE	TB_24H-MOCK_24H	-0.0729136	0.567484	0.799055	no	-0.0729136	0.799055	Coiled-coil domain-containing protein 93
P30882	Ccl5	CCL5_MOUSE	TB_24H-MOCK_24H	#NUM!		0	yes	7.07765	0.0229744	C-C motif chemokine 5 (MuRantes) (SIS-delta) (Small-inducible cytokine A5) (T-cell-specific protein RANTES)
Q03366	Ccl7	CCL7_MOUSE	TB_24H-MOCK_24H	#NUM!		0	yes	3.34429	0.0320673	C-C motif chemokine 7 (Intercrine/chemokine MARC) (Monocyte chemoattractant protein 3) (Monocyte chemotactic protein 3) (MCP-3) (Protein FIC) (Small-inducible cytokine A7)
P51670	Ccl9	CCL9_MOUSE	TB_24H-MOCK_24H	0.402747	0.139091	0.384038	no	0.402747	0.384038	C-C motif chemokine 9 (CCF18) (Macrophage inflammatory protein 1-gamma) (MIP-1-gamma) (Macrophage inflammatory protein-related protein 2) (MRP-2) (Small-inducible cytokine A9) [Cleaved into: CCL9(29-101); CCL9(30-101); CCL9(31-101)]
Q8K2Y9	Ccm2	CCM2_MOUSE	TB_24H-MOCK_24H	0.396411	0.274632	0.558351	no	0.396411	0.558351	Cerebral cavernous malformations protein 2 homolog (Malcavernin) (Osmosensing scaffold for MEKK3)
P25322	Ccnd1	CCND1_MOUSE	TB_24H-MOCK_24H	-1.52947	0.000340976	0.00417695	no	-1.52947	0.00417695	G1/S-specific cyclin-D1
Q9JJA7	Ccnl2	CCNL2_MOUSE	TB_24H-MOCK_24H	-0.264206	0.551453	0.789391	no	-0.264206	0.789391	Cyclin-L2 (Cyclin Ania-6b) (Paneth cell-enhanced expression protein) (PCEE)
Q9QWV9	Ccnt1	CCNT1_MOUSE	TB_24H-MOCK_24H	-0.100209	0.709633	0.873223	no	-0.100209	0.873223	Cyclin-T1 (CycT1) (Cyclin-T)
P80314	Cct2	TCPB_MOUSE	TB_24H-MOCK_24H	-0.287314	0.00109872	0.0109901	no	-0.287314	0.0109901	T-complex protein 1 subunit beta (TCP-1-beta) (CCT-beta)
P80318	Cct3	TCPG_MOUSE	TB_24H-MOCK_24H	-0.307859	0.000674472	0.00727265	no	-0.307859	0.00727265	T-complex protein 1 subunit gamma (TCP-1-gamma) (CCT-gamma) (Matricin) (mTRiC-P5)
P80315	Cct4	TCPD_MOUSE	TB_24H-MOCK_24H	-0.24456	0.0127645	0.073017	no	-0.24456	0.073017	T-complex protein 1 subunit delta (TCP-1-delta) (A45) (CCT-delta)
P80316	Cct5	TCPE_MOUSE	TB_24H-MOCK_24H	-0.232533	0.0657648	0.231945	no	-0.232533	0.231945	T-complex protein 1 subunit epsilon (TCP-1-epsilon) (CCT-epsilon)
P80317	Cct6a	TCPZ_MOUSE	TB_24H-MOCK_24H	-0.332151	0.00423711	0.0311325	no	-0.332151	0.0311325	T-complex protein 1 subunit zeta (TCP-1-zeta) (CCT-zeta-1)
P80313	Cct7	TCPH_MOUSE	TB_24H-MOCK_24H	-0.217281	0.0851919	0.275734	no	-0.217281	0.275734	T-complex protein 1 subunit eta (TCP-1-eta) (CCT-eta) [Cleaved into: T-complex protein 1 subunit eta, N-terminally processed]
P42932	Cct8	TCPQ_MOUSE	TB_24H-MOCK_24H	-0.250976	0.122995	0.355044	no	-0.250976	0.355044	T-complex protein 1 subunit theta (TCP-1-theta) (CCT-theta)
Q8C1Y8	Ccz1	CCZ1_MOUSE	TB_24H-MOCK_24H	0.183335	0.488606	0.757163	no	0.183335	0.757163	Vacuolar fusion protein CCZ1 homolog
P10810	Cd14	CD14_MOUSE	TB_24H-MOCK_24H	1.12023	5.00154e-10	3.45732e-08	no	1.12023	3.45732e-08	Monocyte differentiation antigen CD14 (Myeloid cell-specific leucine-rich glycoprotein) (CD antigen CD14)
Q62192	Cd180	CD180_MOUSE	TB_24H-MOCK_24H	0.225951	0.234725	0.512475	no	0.225951	0.512475	CD180 antigen (Lymphocyte antigen 78) (Ly-78) (Radioprotective 105 kDa protein) (CD antigen CD180)
Q9EP73	Cd274	PD1L1_MOUSE	TB_24H-MOCK_24H	#NUM!		0	yes	6.92903	0.0419851	Programmed cell death 1 ligand 1 (PD-L1) (PDCD1 ligand 1) (Programmed death ligand 1) (B7 homolog 1) (B7-H1) (CD antigen CD274)
P31041	Cd28	CD28_MOUSE	TB_24H-MOCK_24H	0.146544	0.559431	0.793721	no	0.146544	0.793721	T-cell-specific surface glycoprotein CD28 (CD antigen CD28)
Q9JLQ0	Cd2ap	CD2AP_MOUSE	TB_24H-MOCK_24H	-0.120894	0.481986	0.751719	no	-0.120894	0.751719	CD2-associated protein (Mesenchyme-to-epithelium transition protein with SH3 domains 1) (METS-1)
Q6SJQ0	Cd300a	CLM8_MOUSE	TB_24H-MOCK_24H	-0.432161	0.018718	0.096794	no	-0.432161	0.096794	CMRF35-like molecule 8 (CLM-8) (CD300 antigen-like family member A) (Leukocyte mono-Ig-like receptor 1) (Mast cell-derived paired immunoglobulin-like receptor 1) (Myeloid-associated immunoglobulin-like receptor 1) (MAIR-1) (MAIR-I) (CD antigen CD300a)
Q3U497	Cd300lb	CLM7_MOUSE	TB_24H-MOCK_24H	-0.69019	0.000564541	0.00627971	no	-0.69019	0.00627971	CMRF35-like molecule 7 (CLM-7) (CD300 antigen-like family member B) (Immune receptor expressed on myeloid cells 3) (IREM-3) (Leukocyte mono-Ig-like receptor 5) (CD antigen CD300b)
Q6SJQ5	Cd300ld3	CLM3_MOUSE	TB_24H-MOCK_24H	-0.295595	0.0556308	0.206469	no	-0.295595	0.206469	CMRF35-like molecule 3 (CLM-3) (CD300 antigen-like family member H) (CD300 molecule-like family member D3)
Q08857	Cd36	CD36_MOUSE	TB_24H-MOCK_24H	-0.82059	8.63758e-06	0.000185756	no	-0.82059	0.000185756	Platelet glycoprotein 4 (Glycoprotein IIIb) (GPIIIB) (PAS IV) (PAS-4) (Platelet glycoprotein IV) (GPIV) (CD antigen CD36)
P27512	Cd40	TNR5_MOUSE	TB_24H-MOCK_24H	3.11217	1.49897e-10	1.11587e-08	no	3.11217	1.11587e-08	Tumor necrosis factor receptor superfamily member 5 (B-cell surface antigen CD40) (Bp50) (CD40L receptor) (CD antigen CD40)
P15379	Cd44	CD44_MOUSE	TB_24H-MOCK_24H	-0.534085	0.00423188	0.0311325	no	-0.534085	0.0311325	CD44 antigen (Extracellular matrix receptor III) (ECMR-III) (GP90 lymphocyte homing/adhesion receptor) (HUTCH-I) (Hermes antigen) (Hyaluronate receptor) (Lymphocyte antigen 24) (Ly-24) (Phagocytic glycoprotein 1) (PGP-1) (Phagocytic glycoprotein I) (PGP-I) (CD antigen CD44)
Q61735	Cd47	CD47_MOUSE	TB_24H-MOCK_24H	1.40228	0.000315576	0.00394916	no	1.40228	0.00394916	Leukocyte surface antigen CD47 (Integrin-associated protein) (IAP) (CD antigen CD47)
P18181	Cd48	CD48_MOUSE	TB_24H-MOCK_24H	-0.426812	0.0227945	0.112147	no	-0.426812	0.112147	CD48 antigen (BCM1 surface antigen) (BLAST-1) (HM48-1) (MRC OX-45 surface antigen) (SLAM family member 2) (SLAMF2) (Signaling lymphocytic activation molecule 2) (sgp-60) (CD antigen CD48)
Q9QWK4	Cd5l	CD5L_MOUSE	TB_24H-MOCK_24H	#NUM!		0	yes	-2.92236	0.0408593	CD5 antigen-like (Apoptosis inhibitor expressed by macrophages) (mAIM) (Apoptosis inhibitory 6) (SP-alpha)
P31996	Cd68	CD68_MOUSE	TB_24H-MOCK_24H	0.329044	0.0474241	0.185059	no	0.329044	0.185059	Macrosialin (CD antigen CD68)
P37217	Cd69	CD69_MOUSE	TB_24H-MOCK_24H	#NUM!		0	yes	6.65215	0.0349494	Early activation antigen CD69 (CD antigen CD69)
P21855	Cd72	CD72_MOUSE	TB_24H-MOCK_24H	1.12157	7.19739e-05	0.00118056	no	1.12157	0.00118056	B-cell differentiation antigen CD72 (Lyb-2) (Lymphocyte antigen 32) (Ly-32) (CD antigen CD72)
P35762	Cd81	CD81_MOUSE	TB_24H-MOCK_24H	-1.62507	3.16023e-06	7.91479e-05	no	-1.62507	7.91479e-05	CD81 antigen (26 kDa cell surface protein TAPA-1) (Target of the antiproliferative antibody 1) (CD antigen CD81)
P40237	Cd82	CD82_MOUSE	TB_24H-MOCK_24H	0.787202	0.140473	0.386352	no	0.787202	0.386352	CD82 antigen (C33 antigen) (IA4) (Inducible membrane protein R2) (Metastasis suppressor Kangai-1 homolog) (CD antigen CD82)
Q18PI6	Cd84	SLAF5_MOUSE	TB_24H-MOCK_24H	0.241325	0.274108	0.558145	no	0.241325	0.558145	SLAM family member 5 (Leukocyte differentiation antigen CD84) (Signaling lymphocytic activation molecule 5) (CD antigen CD84)
P40240	Cd9	CD9_MOUSE	TB_24H-MOCK_24H	-1.11633	0.000501349	0.00567462	no	-1.11633	0.00567462	CD9 antigen (CD antigen CD9)
O89103	Cd93	C1QR1_MOUSE	TB_24H-MOCK_24H	-2.5521	1.0735e-06	2.90595e-05	no	-2.5521	2.90595e-05	Complement component C1q receptor (C1q/MBL/SPA receptor) (C1qR(p)) (C1qRp) (Cell surface antigen AA4) (Complement component 1 q subcomponent receptor 1) (Lymphocyte antigen 68) (Ly-68) (CD antigen CD93)
Q8CFI2	Cdc34	UB2R1_MOUSE	TB_24H-MOCK_24H	-0.257475	0.43368	0.711346	no	-0.257475	0.711346	Ubiquitin-conjugating enzyme E2 R1 (EC 2.3.2.23) ((E3-independent) E2 ubiquitin-conjugating enzyme R1) (EC 2.3.2.24) (E2 ubiquitin-conjugating enzyme R1) (Ubiquitin-conjugating enzyme E2-32 kDa complementing) (Ubiquitin-conjugating enzyme E2-CDC34) (Ubiquitin-protein ligase R1)
Q61081	Cdc37	CDC37_MOUSE	TB_24H-MOCK_24H	-0.361803	0.0321605	0.141469	no	-0.361803	0.141469	Hsp90 co-chaperone Cdc37 (Hsp90 chaperone protein kinase-targeting subunit) (p50Cdc37) [Cleaved into: Hsp90 co-chaperone Cdc37, N-terminally processed]
P60766	Cdc42	CDC42_MOUSE	TB_24H-MOCK_24H	-0.091234	0.571793	0.801644	no	-0.091234	0.801644	Cell division control protein 42 homolog (G25K GTP-binding protein)
Q7TT50	Cdc42bpb	MRCKB_MOUSE	TB_24H-MOCK_24H	0.240356	0.201798	0.470295	no	0.240356	0.470295	Serine/threonine-protein kinase MRCK beta (EC 2.7.11.1) (CDC42-binding protein kinase beta) (DMPK-like beta) (Myotonic dystrophy kinase-related CDC42-binding kinase beta) (MRCK beta) (Myotonic dystrophy protein kinase-like beta)
Q9JM96	Cdc42ep4	BORG4_MOUSE	TB_24H-MOCK_24H	0.904842	6.12977e-05	0.00103558	no	0.904842	0.00103558	Cdc42 effector protein 4 (Binder of Rho GTPases 4)
Q8BHL7	Cdc42se1	C42S1_MOUSE	TB_24H-MOCK_24H	-0.625628	0.324136	0.610575	no	-0.625628	0.610575	CDC42 small effector protein 1
Q8BGH7	Cdc42se2	C42S2_MOUSE	TB_24H-MOCK_24H	-0.609649	0.00810825	0.0519653	no	-0.609649	0.0519653	CDC42 small effector protein 2
Q6A068	Cdc5l	CDC5L_MOUSE	TB_24H-MOCK_24H	-0.274986	0.245808	0.527744	no	-0.274986	0.527744	Cell division cycle 5-like protein (Cdc5-like protein)
Q8JZM7	Cdc73	CDC73_MOUSE	TB_24H-MOCK_24H	-0.974628	0.00876302	0.0552278	no	-0.974628	0.0552278	Parafibromin (Cell division cycle protein 73 homolog) (Hyperparathyroidism 2 protein homolog)
P11440	Cdk1	CDK1_MOUSE	TB_24H-MOCK_24H	#NUM!		0	yes	-6.72987	0.0151307	Cyclin-dependent kinase 1 (CDK1) (EC 2.7.11.22) (EC 2.7.11.23) (Cell division control protein 2 homolog) (Cell division protein kinase 1) (p34 protein kinase)
P24788	Cdk11b	CD11B_MOUSE	TB_24H-MOCK_24H	-0.31725	0.466815	0.739908	no	-0.31725	0.739908	Cyclin-dependent kinase 11B (Cell division cycle 2-like protein kinase 1) (Cell division protein kinase 11) (Cyclin-dependent kinase 11) (EC 2.7.11.22) (Galactosyltransferase-associated protein kinase p58/GTA) (PITSLRE serine/threonine-protein kinase CDC2L1)
O35495	Cdk14	CDK14_MOUSE	TB_24H-MOCK_24H	-1.41019	9.17242e-07	2.57293e-05	no	-1.41019	2.57293e-05	Cyclin-dependent kinase 14 (EC 2.7.11.22) (Cell division protein kinase 14) (Serine/threonine-protein kinase PFTAIRE-1)
Q04899	Cdk18	CDK18_MOUSE	TB_24H-MOCK_24H	-0.293136	0.305611	0.592101	no	-0.293136	0.592101	Cyclin-dependent kinase 18 (EC 2.7.11.22) (Cell division protein kinase 18) (PCTAIRE-motif protein kinase 3) (Serine/threonine-protein kinase PCTAIRE-3)
P97377	Cdk2	CDK2_MOUSE	TB_24H-MOCK_24H	-1.31059	0.000499307	0.00566808	no	-1.31059	0.00566808	Cyclin-dependent kinase 2 (EC 2.7.11.22) (Cell division protein kinase 2)
P30285	Cdk4	CDK4_MOUSE	TB_24H-MOCK_24H	-2.9038	5.53158e-12	5.78722e-10	no	-2.9038	5.78722e-10	Cyclin-dependent kinase 4 (EC 2.7.11.22) (CRK3) (Cell division protein kinase 4) (PSK-J3)
P49615	Cdk5	CDK5_MOUSE	TB_24H-MOCK_24H	-0.318833	0.0567241	0.209522	no	-0.318833	0.209522	Cyclin-dependent-like kinase 5 (EC 2.7.11.1) (CR6 protein kinase) (CRK6) (Cell division protein kinase 5) (Serine/threonine-protein kinase PSSALRE) (Tau protein kinase II catalytic subunit) (TPKII catalytic subunit)
Q64261	Cdk6	CDK6_MOUSE	TB_24H-MOCK_24H	-0.545783	0.00095332	0.00968583	no	-0.545783	0.00968583	Cyclin-dependent kinase 6 (EC 2.7.11.22) (CR2 protein kinase) (CRK2) (Cell division protein kinase 6) (Serine/threonine-protein kinase PLSTIRE)
Q99J95	Cdk9	CDK9_MOUSE	TB_24H-MOCK_24H	-0.181645	0.526708	0.775575	no	-0.181645	0.775575	Cyclin-dependent kinase 9 (EC 2.7.11.22) (EC 2.7.11.23) (Cell division protein kinase 9)
P39689	Cdkn1a	CDN1A_MOUSE	TB_24H-MOCK_24H	-1.59145	0.00514135	0.0362516	no	-1.59145	0.0362516	Cyclin-dependent kinase inhibitor 1 (CDK-interacting protein 1) (Melanoma differentiation-associated protein) (p21)
Q8BI72	Cdkn2aip	CARF_MOUSE	TB_24H-MOCK_24H	-0.259318	0.150222	0.399938	no	-0.259318	0.399938	CDKN2A-interacting protein (Collaborator of ARF)
Q9D211	Cdkn2aipnl	C2AIL_MOUSE	TB_24H-MOCK_24H	-0.327418	0.586985	0.809317	no	-0.327418	0.809317	CDKN2AIP N-terminal-like protein (CDKN2A-interacting protein N-terminal-like protein)
Q99L43	Cds2	CDS2_MOUSE	TB_24H-MOCK_24H	-0.0984677	0.720024	0.879246	no	-0.0984677	0.879246	Phosphatidate cytidylyltransferase 2 (EC 2.7.7.41) (CDP-DAG synthase 2) (CDP-DG synthase 2) (CDP-diacylglycerol synthase 2) (CDS 2) (CDP-diglyceride pyrophosphorylase 2) (CDP-diglyceride synthase 2) (CTP:phosphatidate cytidylyltransferase 2)
Q4VAA2	Cdv3	CDV3_MOUSE	TB_24H-MOCK_24H	-0.251129	0.641799	0.837628	no	-0.251129	0.837628	Protein CDV3 (Carnitine deficiency-associated protein 3) (Tyrosine-phosphorylated protein 36) (TPP36)
P28033	Cebpb	CEBPB_MOUSE	TB_24H-MOCK_24H	2.59227	5.41571e-05	0.00092762	no	2.59227	0.00092762	CCAAT/enhancer-binding protein beta (C/EBP beta) (AGP/EBP) (Interleukin-6-dependent-binding protein) (IL-6DBP) (Liver-enriched transcriptional activator) (LAP)
Q91WM2	Cecr5	CECR5_MOUSE	TB_24H-MOCK_24H	0.201284	0.616006	0.825147	no	0.201284	0.825147	Cat eye syndrome critical region protein 5 homolog
P28659	Celf1	CELF1_MOUSE	TB_24H-MOCK_24H	-0.119509	0.587395	0.809472	no	-0.119509	0.809472	CUGBP Elav-like family member 1 (CELF-1) (50 kDa nuclear polyadenylated RNA-binding protein) (Brain protein F41) (Bruno-like protein 2) (CUG triplet repeat RNA-binding protein 1) (CUG-BP1) (CUG-BP- and ETR-3-like factor 1) (Deadenylation factor CUG-BP) (Deadenylation factor EDEN-BP) (Embryo deadenylation element-binding protein homolog) (EDEN-BP homolog) (RNA-binding protein BRUNOL-2)
Q9Z0H4	Celf2	CELF2_MOUSE	TB_24H-MOCK_24H	-0.387892	0.0623256	0.222978	no	-0.387892	0.222978	CUGBP Elav-like family member 2 (CELF-2) (Bruno-like protein 3) (CUG triplet repeat RNA-binding protein 2) (CUG-BP2) (CUG-BP- and ETR-3-like factor 2) (ELAV-type RNA-binding protein 3) (ETR-3) (mETR-3) (Neuroblastoma apoptosis-related RNA-binding protein) (mNapor) (RNA-binding protein BRUNOL-3)
Q8BI22	Cep128	CE128_MOUSE	TB_24H-MOCK_24H	-0.550607	0.574258	0.802201	no	-0.550607	0.802201	Centrosomal protein of 128 kDa (Cep128)
Q6A065	Cep170	CE170_MOUSE	TB_24H-MOCK_24H	0.0670244	0.783117	0.908687	no	0.0670244	0.908687	Centrosomal protein of 170 kDa (Cep170)
Q8BGS7	Cept1	CEPT1_MOUSE	TB_24H-MOCK_24H	0.94161	0.00130921	0.0126383	no	0.94161	0.0126383	Choline/ethanolaminephosphotransferase 1 (mCEPT1) (EC 2.7.8.1) (EC 2.7.8.2)
Q8K4Q7	Cerk	CERK1_MOUSE	TB_24H-MOCK_24H	-0.125853	0.554738	0.790903	no	-0.125853	0.790903	Ceramide kinase (mCERK) (EC 2.7.1.138) (Acylsphingosine kinase)
Q924Z4	Cers2	CERS2_MOUSE	TB_24H-MOCK_24H	-0.228392	0.10575	0.321065	no	-0.228392	0.321065	Ceramide synthase 2 (CerS2) (LAG1 longevity assurance homolog 2) (Translocating chain-associating membrane protein homolog 3) (TRAM homolog 3)
Q9D6K9	Cers5	CERS5_MOUSE	TB_24H-MOCK_24H	-1.07958	0.00650956	0.0437474	no	-1.07958	0.0437474	Ceramide synthase 5 (CerS5) (EC 2.3.1.24) (LAG1 longevity assurance homolog 5) (Translocating chain-associating membrane protein homolog 4) (TRAM homolog 4)
Q8C172	Cers6	CERS6_MOUSE	TB_24H-MOCK_24H	0.520401	0.149534	0.399479	no	0.520401	0.399479	Ceramide synthase 6 (CerS6) (LAG1 longevity assurance homolog 6)
Q8VCC2	Ces1	EST1_MOUSE	TB_24H-MOCK_24H	0.425733	0.215768	0.485878	no	0.425733	0.485878	Liver carboxylesterase 1 (EC 3.1.1.1) (Acyl-coenzyme A:cholesterol acyltransferase) (Carboxylesterase 1G) (ES-x)
Q9R1K9	Cetn2	CETN2_MOUSE	TB_24H-MOCK_24H	-0.311968	0.313962	0.599632	no	-0.311968	0.599632	Centrin-2 (Caltractin isoform 1)
Q0VFX2	Cfap157	CF157_MOUSE	TB_24H-MOCK_24H	-0.00232791	0.992658	0.996904	no	-0.00232791	0.996904	Cilia- and flagella-associated protein 157
P18760	Cfl1	COF1_MOUSE	TB_24H-MOCK_24H	-0.12825	0.489684	0.75853	no	-0.12825	0.75853	Cofilin-1 (Cofilin, non-muscle isoform)
P11680	Cfp	PROP_MOUSE	TB_24H-MOCK_24H	0.699112	0.039081	0.161539	no	0.699112	0.161539	Properdin (Complement factor P)
Q8BHG9	Cggbp1	CGBP1_MOUSE	TB_24H-MOCK_24H	-0.449531	0.130447	0.367243	no	-0.449531	0.367243	CGG triplet repeat-binding protein 1 (CGG-binding protein 1) (20 kDa CGG-binding protein) (p20-CGGBP DNA-binding protein)
Q9CQA6	Chchd1	CHCH1_MOUSE	TB_24H-MOCK_24H	0.149627	0.825586	0.927676	no	0.149627	0.927676	Coiled-coil-helix-coiled-coil-helix domain-containing protein 1 (28S ribosomal protein S37, mitochondrial) (MRP-S37)
Q9D1L0	Chchd2	CHCH2_MOUSE	TB_24H-MOCK_24H	-0.890612	0.00190862	0.0171406	no	-0.890612	0.0171406	Coiled-coil-helix-coiled-coil-helix domain-containing protein 2
Q9CRB9	Chchd3	MIC19_MOUSE	TB_24H-MOCK_24H	0.0561259	0.64177	0.837628	no	0.0561259	0.837628	MICOS complex subunit Mic19 (Coiled-coil-helix-coiled-coil-helix domain-containing protein 3)
Q8VEA4	Chchd4	MIA40_MOUSE	TB_24H-MOCK_24H	-0.863094	0.00506723	0.0359913	no	-0.863094	0.0359913	Mitochondrial intermembrane space import and assembly protein 40 (Coiled-coil-helix-coiled-coil-helix domain-containing protein 4)
Q91VN4	Chchd6	MIC25_MOUSE	TB_24H-MOCK_24H	-0.137637	0.502919	0.766097	no	-0.137637	0.766097	MICOS complex subunit Mic25 (Coiled-coil-helix-coiled-coil-helix domain-containing protein 6)
P40201	Chd1	CHD1_MOUSE	TB_24H-MOCK_24H	-0.406963	0.505547	0.766538	no	-0.406963	0.766538	Chromodomain-helicase-DNA-binding protein 1 (CHD-1) (EC 3.6.4.12) (ATP-dependent helicase CHD1)
Q6PDQ2	Chd4	CHD4_MOUSE	TB_24H-MOCK_24H	-0.147603	0.386217	0.669623	no	-0.147603	0.669623	Chromodomain-helicase-DNA-binding protein 4 (CHD-4) (EC 3.6.4.12)
Q8CGZ0	Cherp	CHERP_MOUSE	TB_24H-MOCK_24H	-0.187838	0.277594	0.561969	no	-0.187838	0.561969	Calcium homeostasis endoplasmic reticulum protein (SR-related CTD-associated factor 6)
Q922Q9	Chid1	CHID1_MOUSE	TB_24H-MOCK_24H	0.219039	0.278421	0.562207	no	0.219039	0.562207	Chitinase domain-containing protein 1
O55229	Chkb	CHKB_MOUSE	TB_24H-MOCK_24H	-0.472157	0.0785972	0.261443	no	-0.472157	0.261443	Choline/ethanolamine kinase (Choline kinase beta) (CK) (CKB) (EC 2.7.1.32) (Ethanolamine kinase) (EK) (EC 2.7.1.82) (choline/ethanolamine kinase beta) (CKEKB)
Q9QXG2	Chm	RAE1_MOUSE	TB_24H-MOCK_24H	-0.313366	0.0342912	0.148001	no	-0.313366	0.148001	Rab proteins geranylgeranyltransferase component A 1 (Choroideremia protein homolog) (Rab escort protein 1) (REP-1)
Q921W0	Chmp1a	CHM1A_MOUSE	TB_24H-MOCK_24H	-0.0969041	0.826555	0.92776	no	-0.0969041	0.92776	Charged multivesicular body protein 1a (Chromatin-modifying protein 1a) (CHMP1a)
Q99LU0	Chmp1b1	CH1B1_MOUSE	TB_24H-MOCK_24H	0.320054	0.207435	0.476829	no	0.320054	0.476829	Charged multivesicular body protein 1b-1 (Chromatin-modifying protein 1b-1) (CHMP1b-1)
Q9DB34	Chmp2a	CHM2A_MOUSE	TB_24H-MOCK_24H	0.600864	0.125662	0.358729	no	0.600864	0.358729	Charged multivesicular body protein 2a (Chromatin-modifying protein 2a) (CHMP2a) (Vacuolar protein sorting-associated protein 2) (mVps2)
Q8BJF9	Chmp2b	CHM2B_MOUSE	TB_24H-MOCK_24H	-0.269794	0.541404	0.783789	no	-0.269794	0.783789	Charged multivesicular body protein 2b (Chromatin-modifying protein 2b) (CHMP2b)
Q9CQ10	Chmp3	CHMP3_MOUSE	TB_24H-MOCK_24H	0.0419308	0.910016	0.961108	no	0.0419308	0.961108	Charged multivesicular body protein 3 (Chromatin-modifying protein 3) (Vacuolar protein sorting-associated protein 24)
Q9D8B3	Chmp4b	CHM4B_MOUSE	TB_24H-MOCK_24H	1.76884	0.00631343	0.0431028	no	1.76884	0.0431028	Charged multivesicular body protein 4b (Chromatin-modifying protein 4b) (CHMP4b)
Q9D7S9	Chmp5	CHMP5_MOUSE	TB_24H-MOCK_24H	0.437815	0.201602	0.470295	no	0.437815	0.470295	Charged multivesicular body protein 5 (Chromatin-modifying protein 5) (SNF7 domain-containing protein 2)
P0C0A3	Chmp6	CHMP6_MOUSE	TB_24H-MOCK_24H	-0.0765081	0.868894	0.945926	no	-0.0765081	0.945926	Charged multivesicular body protein 6 (Chromatin-modifying protein 6)
Q8R1T1	Chmp7	CHMP7_MOUSE	TB_24H-MOCK_24H	0.0976019	0.81667	0.923939	no	0.0976019	0.923939	Charged multivesicular body protein 7 (Chromatin-modifying protein 7)
Q9D1P4	Chordc1	CHRD1_MOUSE	TB_24H-MOCK_24H	0.478952	0.223949	0.49853	no	0.478952	0.49853	Cysteine and histidine-rich domain-containing protein 1 (CHORD domain-containing protein 1) (CHORD-containing protein 1) (Chp-1) (Protein morgana)
P0CG14	Chtf8	CTF8A_MOUSE	TB_24H-MOCK_24H	-0.0944601	0.710542	0.873322	no	-0.0944601	0.873322	Chromosome transmission fidelity protein 8 homolog isoform 2
Q9CY57	Chtop	CHTOP_MOUSE	TB_24H-MOCK_24H	-0.177682	0.570376	0.80095	no	-0.177682	0.80095	Chromatin target of PRMT1 protein (Friend of PRMT1 protein) (Small arginine- and glycine-rich protein) (SRAG)
Q99KN2	Ciao1	CIAO1_MOUSE	TB_24H-MOCK_24H	-0.285093	0.435781	0.713884	no	-0.285093	0.713884	Probable cytosolic iron-sulfur protein assembly protein CIAO1 (WD repeat-containing protein 39)
Q8WTY4	Ciapin1	CPIN1_MOUSE	TB_24H-MOCK_24H	-0.978627	0.0332857	0.144449	no	-0.978627	0.144449	Anamorsin (Cytokine-induced apoptosis inhibitor 1) (Fe-S cluster assembly protein DRE2 homolog)
Q924A2	Cic	CIC_MOUSE	TB_24H-MOCK_24H	0.0833332	0.795347	0.914542	no	0.0833332	0.914542	Protein capicua homolog
P60824	Cirbp	CIRBP_MOUSE	TB_24H-MOCK_24H	-0.0560329	0.923524	0.96961	no	-0.0560329	0.96961	Cold-inducible RNA-binding protein (A18 hnRNP) (Glycine-rich RNA-binding protein CIRP)
Q91WS0	Cisd1	CISD1_MOUSE	TB_24H-MOCK_24H	-0.229717	0.40091	0.679997	no	-0.229717	0.679997	CDGSH iron-sulfur domain-containing protein 1 (MitoNEET)
Q9CQB5	Cisd2	CISD2_MOUSE	TB_24H-MOCK_24H	-0.0947225	0.682091	0.857683	no	-0.0947225	0.857683	CDGSH iron-sulfur domain-containing protein 2 (MitoNEET-related 1 protein) (Miner1) (Nervous system overexpressed protein 70)
Q8BMK4	Ckap4	CKAP4_MOUSE	TB_24H-MOCK_24H	-0.480419	0.000109999	0.00161291	no	-0.480419	0.00161291	Cytoskeleton-associated protein 4 (63-kDa cytoskeleton-linking membrane protein) (Climp-63) (p63)
A2AGT5	Ckap5	CKAP5_MOUSE	TB_24H-MOCK_24H	-0.505643	0.000485254	0.00552475	no	-0.505643	0.00552475	Cytoskeleton-associated protein 5
Q04447	Ckb	KCRB_MOUSE	TB_24H-MOCK_24H	-0.35994	0.144008	0.390648	no	-0.35994	0.390648	Creatine kinase B-type (EC 2.7.3.2) (B-CK) (Creatine kinase B chain)
Q80TV8	Clasp1	CLAP1_MOUSE	TB_24H-MOCK_24H	0.174461	0.54033	0.783789	no	0.174461	0.783789	CLIP-associating protein 1 (Cytoplasmic linker-associated protein 1)
Q8BRT1	Clasp2	CLAP2_MOUSE	TB_24H-MOCK_24H	-0.417264	0.0149099	0.0814053	no	-0.417264	0.0814053	CLIP-associating protein 2 (Cytoplasmic linker-associated protein 2)
Q99LI2	Clcc1	CLCC1_MOUSE	TB_24H-MOCK_24H	-0.950732	0.0707936	0.243161	no	-0.950732	0.243161	Chloride channel CLIC-like protein 1
Q9WVD4	Clcn5	CLCN5_MOUSE	TB_24H-MOCK_24H	-0.356138	0.0252647	0.120443	no	-0.356138	0.120443	H(+)/Cl(-) exchange transporter 5 (Chloride channel protein 5) (ClC-5) (Chloride transporter ClC-5)
O70496	Clcn7	CLCN7_MOUSE	TB_24H-MOCK_24H	0.141947	0.383027	0.667581	no	0.141947	0.667581	H(+)/Cl(-) exchange transporter 7 (Chloride channel 7 alpha subunit) (Chloride channel protein 7) (ClC-7)
P49300	Clec10a	CLC10_MOUSE	TB_24H-MOCK_24H	-0.686532	0.00244653	0.0206914	no	-0.686532	0.0206914	C-type lectin domain family 10 member A (MMGL) (Macrophage asialoglycoprotein-binding protein 1) (M-ASGP-BP-1) (Macrophage galactose/N-acetylgalactosamine-specific lectin)
Q504P2	Clec12a	CL12A_MOUSE	TB_24H-MOCK_24H	-0.586787	0.00719809	0.0471469	no	-0.586787	0.0471469	C-type lectin domain family 12 member A (C-type lectin-like molecule 1) (CLL-1) (Myeloid inhibitory C-type lectin-like receptor) (MICL)
Q91V08	Clec2d	CLC2D_MOUSE	TB_24H-MOCK_24H	0.893066	0.000297492	0.00380611	no	0.893066	0.00380611	C-type lectin domain family 2 member D (C-type lectin-related protein B) (Clr-b) (Lectin-like transmembrane protein) (Osteoclast inhibitory lectin)
Q9QZ15	Clec4a	CLC4A_MOUSE	TB_24H-MOCK_24H	0.460498	0.0470276	0.184097	no	0.460498	0.184097	C-type lectin domain family 4 member A (C-type lectin superfamily member 6) (Dendritic cell immunoreceptor)
Q9Z2H6	Clec4d	CLC4D_MOUSE	TB_24H-MOCK_24H	#NUM!		0	yes	5.61925	0.0467742	C-type lectin domain family 4 member D (C-type lectin superfamily member 8) (Macrophage-restricted C-type lectin)
Q9R0Q8	Clec4e	CLC4E_MOUSE	TB_24H-MOCK_24H	2.32862	5.78888e-09	2.98783e-07	no	2.32862	2.98783e-07	C-type lectin domain family 4 member E (C-type lectin superfamily member 9) (Macrophage-inducible C-type lectin)
Q9Z1Q5	Clic1	CLIC1_MOUSE	TB_24H-MOCK_24H	-0.0406826	0.662347	0.848427	no	-0.0406826	0.848427	Chloride intracellular channel protein 1 (Nuclear chloride ion channel 27) (NCC27)
Q9QYB1	Clic4	CLIC4_MOUSE	TB_24H-MOCK_24H	0.345406	0.0315828	0.140195	no	0.345406	0.140195	Chloride intracellular channel protein 4 (mc3s5/mtCLIC)
Q99KN9	Clint1	EPN4_MOUSE	TB_24H-MOCK_24H	-0.0717451	0.683198	0.857683	no	-0.0717451	0.857683	Clathrin interactor 1 (Enthoprotin) (Epsin-4) (Epsin-related protein) (EpsinR)
Q922J3	Clip1	CLIP1_MOUSE	TB_24H-MOCK_24H	-0.0761967	0.768917	0.903331	no	-0.0761967	0.903331	CAP-Gly domain-containing linker protein 1 (Cytoplasmic linker protein 170) (CLIP-170) (Restin)
Q9Z0H8	Clip2	CLIP2_MOUSE	TB_24H-MOCK_24H	0.150347	0.59874	0.814952	no	0.150347	0.814952	CAP-Gly domain-containing linker protein 2 (Cytoplasmic linker protein 115) (CLIP-115) (Cytoplasmic linker protein 2)
Q61124	Cln3	CLN3_MOUSE	TB_24H-MOCK_24H	-0.020811	0.946643	0.978493	no	-0.020811	0.978493	Battenin (Protein CLN3)
Q3UMW8	Cln5	CLN5_MOUSE	TB_24H-MOCK_24H	1.44348	0.0024109	0.0205112	no	1.44348	0.0205112	Ceroid-lipofuscinosis neuronal protein 5 homolog (Protein CLN5) [Cleaved into: Ceroid-lipofuscinosis neuronal protein 5 homolog, secreted form]
Q61189	Clns1a	ICLN_MOUSE	TB_24H-MOCK_24H	-0.187102	0.516015	0.772261	no	-0.187102	0.772261	Methylosome subunit pICln (Chloride channel, nucleotide sensitive 1A) (Chloride conductance regulatory protein ICln) (I(Cln)) (Chloride ion current inducer protein) (ClCI)
O88696	Clpp	CLPP_MOUSE	TB_24H-MOCK_24H	-0.356457	0.189674	0.456631	no	-0.356457	0.456631	ATP-dependent Clp protease proteolytic subunit, mitochondrial (EC 3.4.21.92) (Endopeptidase Clp)
Q8VBZ3	Clptm1	CLPT1_MOUSE	TB_24H-MOCK_24H	0.076113	0.65487	0.84364	no	0.076113	0.84364	Cleft lip and palate transmembrane protein 1 homolog (Thymic epithelial cell surface antigen)
Q9JHS4	Clpx	CLPX_MOUSE	TB_24H-MOCK_24H	-0.409918	0.265995	0.550625	no	-0.409918	0.550625	ATP-dependent Clp protease ATP-binding subunit clpX-like, mitochondrial
O08585	Clta	CLCA_MOUSE	TB_24H-MOCK_24H	0.0612085	0.86048	0.944051	no	0.0612085	0.944051	Clathrin light chain A (Lca)
Q6IRU5	Cltb	CLCB_MOUSE	TB_24H-MOCK_24H	-0.435914	0.249499	0.531248	no	-0.435914	0.531248	Clathrin light chain B (Lcb)
Q68FD5	Cltc	CLH1_MOUSE	TB_24H-MOCK_24H	0.0324135	0.767904	0.902857	no	0.0324135	0.902857	Clathrin heavy chain 1
Q5SW19	Cluh	CLU_MOUSE	TB_24H-MOCK_24H	-1.88932	4.2765e-07	1.33503e-05	no	-1.88932	1.33503e-05	Clustered mitochondria protein homolog
Q8R4N0	Clybl	CLYBL_MOUSE	TB_24H-MOCK_24H	0.0393238	0.860132	0.944023	no	0.0393238	0.944023	Citrate lyase subunit beta-like protein, mitochondrial (Citrate lyase beta-like) (Beta-methylmalate synthase) (EC 2.3.3.-) (Malate synthase) (EC 2.3.3.9)
Q99KK2	Cmas	NEUA_MOUSE	TB_24H-MOCK_24H	-0.0612399	0.608222	0.821216	no	-0.0612399	0.821216	N-acylneuraminate cytidylyltransferase (EC 2.7.7.43) (CMP-N-acetylneuraminic acid synthase) (CMP-NeuNAc synthase)
Q9DBP5	Cmpk1	KCY_MOUSE	TB_24H-MOCK_24H	-0.20161	0.16178	0.417179	no	-0.20161	0.417179	UMP-CMP kinase (EC 2.7.4.14) (Deoxycytidylate kinase) (CK) (dCMP kinase) (Nucleoside-diphosphate kinase) (EC 2.7.4.6) (Uridine monophosphate/cytidine monophosphate kinase) (UMP/CMP kinase) (UMP/CMPK)
Q3U5Q7	Cmpk2	CMPK2_MOUSE	TB_24H-MOCK_24H	3.49596	0	0	no	3.49596	0	UMP-CMP kinase 2, mitochondrial (EC 2.7.4.14) (Nucleoside-diphosphate kinase) (EC 2.7.4.6) (Thymidylate kinase LPS-inducible member) (TYKi)
Q99LJ5	Cmtm3	CKLF3_MOUSE	TB_24H-MOCK_24H	0.218981	0.514548	0.772261	no	0.218981	0.772261	CKLF-like MARVEL transmembrane domain-containing protein 3 (Chemokine-like factor superfamily member 3)
Q9CZ69	Cmtm6	CKLF6_MOUSE	TB_24H-MOCK_24H	-0.0958743	0.728324	0.882087	no	-0.0958743	0.882087	CKLF-like MARVEL transmembrane domain-containing protein 6 (Chemokine-like factor superfamily member 6)
Q9DBC3	Cmtr1	CMTR1_MOUSE	TB_24H-MOCK_24H	0.913277	7.1762e-05	0.00118056	no	0.913277	0.00118056	Cap-specific mRNA (nucleoside-2'-O-)-methyltransferase 1 (EC 2.1.1.57) (Cap methyltransferase 1) (Cap1 2'O-ribose methyltransferase 1) (MTr1) (FtsJ methyltransferase domain-containing protein 2)
Q70KF4	Cmya5	CMYA5_MOUSE	TB_24H-MOCK_24H	-0.314364	0.436823	0.714985	no	-0.314364	0.714985	Cardiomyopathy-associated protein 5 (Heart and skeletal muscle-specific and sprouty domain-containing) (Myospryn) (Stretch-response protein 553) (Stretch-responsive fibronectin protein type 3) (TRIM-like protein)
P53996	Cnbp	CNBP_MOUSE	TB_24H-MOCK_24H	-0.456239	0.805022	0.92005	no	-0.456239	0.92005	Cellular nucleic acid-binding protein (CNBP) (Zinc finger protein 9)
Q9D1A2	Cndp2	CNDP2_MOUSE	TB_24H-MOCK_24H	0.379538	0.00727244	0.0474732	no	0.379538	0.0474732	Cytosolic non-specific dipeptidase (EC 3.4.13.18) (CNDP dipeptidase 2) (Glutamate carboxypeptidase-like protein 1)
Q08093	Cnn2	CNN2_MOUSE	TB_24H-MOCK_24H	0.0949163	0.80329	0.918351	no	0.0949163	0.918351	Calponin-2 (Calponin H2, smooth muscle) (Neutral calponin)
Q32NY4	Cnnm3	CNNM3_MOUSE	TB_24H-MOCK_24H	0.0983518	0.871526	0.945978	no	0.0983518	0.945978	Metal transporter CNNM3 (Ancient conserved domain-containing protein 3) (mACDP3) (Cyclin-M3)
Q6ZQ08	Cnot1	CNOT1_MOUSE	TB_24H-MOCK_24H	-0.0143062	0.944484	0.97809	no	-0.0143062	0.97809	CCR4-NOT transcription complex subunit 1 (CCR4-associated factor 1)
Q8BH15	Cnot10	CNO10_MOUSE	TB_24H-MOCK_24H	-0.458989	0.0679391	0.237357	no	-0.458989	0.237357	CCR4-NOT transcription complex subunit 10
Q9CWN7	Cnot11	CNO11_MOUSE	TB_24H-MOCK_24H	-0.3256	0.0347515	0.149198	no	-0.3256	0.149198	CCR4-NOT transcription complex subunit 11
Q8C5L3	Cnot2	CNOT2_MOUSE	TB_24H-MOCK_24H	-0.0891696	0.707239	0.872317	no	-0.0891696	0.872317	CCR4-NOT transcription complex subunit 2 (CCR4-associated factor 2)
Q8K0V4	Cnot3	CNOT3_MOUSE	TB_24H-MOCK_24H	-0.0790412	0.802354	0.917552	no	-0.0790412	0.917552	CCR4-NOT transcription complex subunit 3 (CCR4-associated factor 3)
P16330	Cnp	CN37_MOUSE	TB_24H-MOCK_24H	0.985764	4.12376e-05	0.00073225	no	0.985764	0.00073225	2',3'-cyclic-nucleotide 3'-phosphodiesterase (CNP) (CNPase) (EC 3.1.4.37)
Q9QXT0	Cnpy2	CNPY2_MOUSE	TB_24H-MOCK_24H	-0.0316716	0.932952	0.974291	no	-0.0316716	0.974291	Protein canopy homolog 2 (MIR-interacting saposin-like protein) (Putative secreted protein ZSIG9) (Transmembrane protein 4)
Q9DAU1	Cnpy3	CNPY3_MOUSE	TB_24H-MOCK_24H	-0.125382	0.800655	0.916342	no	-0.125382	0.916342	Protein canopy homolog 3 (Protein associated with Tlr4) (Trinucleotide repeat-containing gene 5 protein)
Q9D2R6	Coa3	COA3_MOUSE	TB_24H-MOCK_24H	-0.780507	0.000719234	0.00760698	no	-0.780507	0.00760698	Cytochrome c oxidase assembly factor 3 homolog, mitochondrial (Coiled-coil domain-containing protein 56)
Q921H9	Coa7	COA7_MOUSE	TB_24H-MOCK_24H	-0.0117554	0.976881	0.992839	no	-0.0117554	0.992839	Cytochrome c oxidase assembly factor 7 (Beta-lactamase hcp-like protein) (Respiratory chain assembly factor 1) (Sel1 repeat-containing protein 1)
Q9DBL7	Coasy	COASY_MOUSE	TB_24H-MOCK_24H	-0.0603123	0.832829	0.930018	no	-0.0603123	0.930018	Bifunctional coenzyme A synthase (CoA synthase) [Includes: Phosphopantetheine adenylyltransferase (EC 2.7.7.3) (Dephospho-CoA pyrophosphorylase) (Pantetheine-phosphate adenylyltransferase) (PPAT); Dephospho-CoA kinase (DPCK) (EC 2.7.1.24) (Dephosphocoenzyme A kinase) (DPCOAK)]
Q9Z160	Cog1	COG1_MOUSE	TB_24H-MOCK_24H	0.420344	0.191557	0.458293	no	0.420344	0.458293	Conserved oligomeric Golgi complex subunit 1 (COG complex subunit 1) (Component of oligomeric Golgi complex 1) (Low density lipoprotein receptor defect B-complementing protein)
Q921L5	Cog2	COG2_MOUSE	TB_24H-MOCK_24H	0.332266	0.358571	0.647402	no	0.332266	0.647402	Conserved oligomeric Golgi complex subunit 2 (COG complex subunit 2) (Component of oligomeric Golgi complex 2) (Low density lipoprotein receptor defect C-complementing protein)
Q8CI04	Cog3	COG3_MOUSE	TB_24H-MOCK_24H	0.222728	0.528949	0.777063	no	0.222728	0.777063	Conserved oligomeric Golgi complex subunit 3 (COG complex subunit 3) (Component of oligomeric Golgi complex 3)
Q8R1U1	Cog4	COG4_MOUSE	TB_24H-MOCK_24H	0.0478423	0.861368	0.944051	no	0.0478423	0.944051	Conserved oligomeric Golgi complex subunit 4 (COG complex subunit 4) (Component of oligomeric Golgi complex 4)
Q8C0L8	Cog5	COG5_MOUSE	TB_24H-MOCK_24H	-0.283448	0.0369011	0.155467	no	-0.283448	0.155467	Conserved oligomeric Golgi complex subunit 5 (COG complex subunit 5) (Component of oligomeric Golgi complex 5)
Q8R3I3	Cog6	COG6_MOUSE	TB_24H-MOCK_24H	0.16844	0.67717	0.854959	no	0.16844	0.854959	Conserved oligomeric Golgi complex subunit 6 (COG complex subunit 6) (Component of oligomeric Golgi complex 6)
Q9JJA2	Cog8	COG8_MOUSE	TB_24H-MOCK_24H	0.562958	0.0206117	0.104435	no	0.562958	0.104435	Conserved oligomeric Golgi complex subunit 8 (COG complex subunit 8) (Component of oligomeric Golgi complex 8)
P39061	Col18a1	COIA1_MOUSE	TB_24H-MOCK_24H	0.262773	0.468386	0.740958	no	0.262773	0.740958	Collagen alpha-1(XVIII) chain [Cleaved into: Endostatin]
Q9EQG9	Col4a3bp	C43BP_MOUSE	TB_24H-MOCK_24H	0.229973	0.0862516	0.27777	no	0.229973	0.27777	Collagen type IV alpha-3-binding protein (Ceramide transfer protein) (Goodpasture antigen-binding protein) (GPBP) (START domain-containing protein 11) (StARD11) (StAR-related lipid transfer protein 11)
Q8K297	Colgalt1	GT251_MOUSE	TB_24H-MOCK_24H	-0.227769	0.0526197	0.198336	no	-0.227769	0.198336	Procollagen galactosyltransferase 1 (EC 2.4.1.50) (Collagen beta(1-O)galactosyltransferase 1) (Glycosyltransferase 25 family member 1) (Hydroxylysine galactosyltransferase 1)
Q8K4M5	Commd1	COMD1_MOUSE	TB_24H-MOCK_24H	-0.422908	0.189085	0.456043	no	-0.422908	0.456043	COMM domain-containing protein 1 (Protein Murr1)
Q8JZY2	Commd10	COMDA_MOUSE	TB_24H-MOCK_24H	-0.181691	0.695272	0.866186	no	-0.181691	0.866186	COMM domain-containing protein 10 (Down-regulated in W/WV mouse stomach 2) (mDRWMS2)
Q8BXC6	Commd2	COMD2_MOUSE	TB_24H-MOCK_24H	-0.266786	0.339107	0.626163	no	-0.266786	0.626163	COMM domain-containing protein 2
Q63829	Commd3	COMD3_MOUSE	TB_24H-MOCK_24H	-0.062361	0.814147	0.923671	no	-0.062361	0.923671	COMM domain-containing protein 3 (Bmi-1 upstream gene protein) (Bup protein)
Q9CQ02	Commd4	COMD4_MOUSE	TB_24H-MOCK_24H	-0.532142	0.151617	0.402543	no	-0.532142	0.402543	COMM domain-containing protein 4
Q8R395	Commd5	COMD5_MOUSE	TB_24H-MOCK_24H	-0.178533	0.507302	0.767596	no	-0.178533	0.767596	COMM domain-containing protein 5
Q3V4B5	Commd6	COMD6_MOUSE	TB_24H-MOCK_24H	-0.260777	0.0528535	0.198637	no	-0.260777	0.198637	COMM domain-containing protein 6
Q8BG94	Commd7	COMD7_MOUSE	TB_24H-MOCK_24H	-0.492121	0.186298	0.452577	no	-0.492121	0.452577	COMM domain-containing protein 7
Q9CZG3	Commd8	COMD8_MOUSE	TB_24H-MOCK_24H	-0.315017	0.0199966	0.10228	no	-0.315017	0.10228	COMM domain-containing protein 8
Q8K2Q0	Commd9	COMD9_MOUSE	TB_24H-MOCK_24H	0.0420755	0.88871	0.951495	no	0.0420755	0.951495	COMM domain-containing protein 9
O88587	Comt	COMT_MOUSE	TB_24H-MOCK_24H	0.0152188	0.953727	0.981798	no	0.0152188	0.981798	Catechol O-methyltransferase (EC 2.1.1.6)
Q8BIG7	Comtd1	CMTD1_MOUSE	TB_24H-MOCK_24H	-0.318821	0.175983	0.436967	no	-0.318821	0.436967	Catechol O-methyltransferase domain-containing protein 1 (EC 2.1.1.-)
Q8CIE6	Copa	COPA_MOUSE	TB_24H-MOCK_24H	0.0731204	0.424435	0.704238	no	0.0731204	0.704238	Coatomer subunit alpha (Alpha-coat protein) (Alpha-COP) [Cleaved into: Xenin (Xenopsin-related peptide); Proxenin]
Q9JIF7	Copb1	COPB_MOUSE	TB_24H-MOCK_24H	0.13585	0.390027	0.671313	no	0.13585	0.671313	Coatomer subunit beta (Beta-coat protein) (Beta-COP)
O55029	Copb2	COPB2_MOUSE	TB_24H-MOCK_24H	-0.00789817	0.971086	0.990012	no	-0.00789817	0.990012	Coatomer subunit beta' (Beta'-coat protein) (Beta'-COP) (p102)
O89079	Cope	COPE_MOUSE	TB_24H-MOCK_24H	0.0535205	0.775037	0.905848	no	0.0535205	0.905848	Coatomer subunit epsilon (Epsilon-coat protein) (Epsilon-COP)
Q9QZE5	Copg1	COPG1_MOUSE	TB_24H-MOCK_24H	0.168473	0.0805431	0.265347	no	0.168473	0.265347	Coatomer subunit gamma-1 (Gamma-1-coat protein) (Gamma-1-COP)
Q9QXK3	Copg2	COPG2_MOUSE	TB_24H-MOCK_24H	0.299459	0.0397142	0.163373	no	0.299459	0.163373	Coatomer subunit gamma-2 (Gamma-2-coat protein) (Gamma-2-COP)
P61202	Cops2	CSN2_MOUSE	TB_24H-MOCK_24H	-0.279393	0.0897162	0.283735	no	-0.279393	0.283735	COP9 signalosome complex subunit 2 (SGN2) (Signalosome subunit 2) (Alien homolog) (JAB1-containing signalosome subunit 2) (Thyroid receptor-interacting protein 15) (TR-interacting protein 15) (TRIP-15)
O88543	Cops3	CSN3_MOUSE	TB_24H-MOCK_24H	-0.31058	0.0685077	0.238483	no	-0.31058	0.238483	COP9 signalosome complex subunit 3 (SGN3) (Signalosome subunit 3) (JAB1-containing signalosome subunit 3)
O88544	Cops4	CSN4_MOUSE	TB_24H-MOCK_24H	-0.137535	0.374042	0.659944	no	-0.137535	0.659944	COP9 signalosome complex subunit 4 (SGN4) (Signalosome subunit 4) (JAB1-containing signalosome subunit 4)
O35864	Cops5	CSN5_MOUSE	TB_24H-MOCK_24H	0.0164093	0.975167	0.99282	no	0.0164093	0.99282	COP9 signalosome complex subunit 5 (SGN5) (Signalosome subunit 5) (EC 3.4.-.-) (Jun activation domain-binding protein 1) (Kip1 C-terminus-interacting protein 2)
O88545	Cops6	CSN6_MOUSE	TB_24H-MOCK_24H	-0.131765	0.385947	0.669623	no	-0.131765	0.669623	COP9 signalosome complex subunit 6 (SGN6) (Signalosome subunit 6) (JAB1-containing signalosome subunit 6)
Q9CZ04	Cops7a	CSN7A_MOUSE	TB_24H-MOCK_24H	-0.0895222	0.79712	0.915081	no	-0.0895222	0.915081	COP9 signalosome complex subunit 7a (SGN7a) (Signalosome subunit 7a) (JAB1-containing signalosome subunit 7a)
Q8BV13	Cops7b	CSN7B_MOUSE	TB_24H-MOCK_24H	-0.853642	0.533112	0.778986	no	-0.853642	0.778986	COP9 signalosome complex subunit 7b (SGN7b) (Signalosome subunit 7b) (JAB1-containing signalosome subunit 7b)
Q8VBV7	Cops8	CSN8_MOUSE	TB_24H-MOCK_24H	-0.100945	0.517307	0.772261	no	-0.100945	0.772261	COP9 signalosome complex subunit 8 (SGN8) (Signalosome subunit 8) (COP9 homolog) (JAB1-containing signalosome subunit 8)
P61924	Copz1	COPZ1_MOUSE	TB_24H-MOCK_24H	0.240101	0.140777	0.386734	no	0.240101	0.386734	Coatomer subunit zeta-1 (Zeta-1-coat protein) (Zeta-1 COP)
Q8BMS4	Coq3	COQ3_MOUSE	TB_24H-MOCK_24H	-0.0304502	0.901126	0.958014	no	-0.0304502	0.958014	Ubiquinone biosynthesis O-methyltransferase, mitochondrial (3-demethylubiquinol 3-O-methyltransferase) (EC 2.1.1.64) (Polyprenyldihydroxybenzoate methyltransferase) (EC 2.1.1.114)
Q9CXI0	Coq5	COQ5_MOUSE	TB_24H-MOCK_24H	-0.574022	0.126105	0.359464	no	-0.574022	0.359464	2-methoxy-6-polyprenyl-1,4-benzoquinol methylase, mitochondrial (EC 2.1.1.201) (Ubiquinone biosynthesis methyltransferase COQ5)
Q8R1S0	Coq6	COQ6_MOUSE	TB_24H-MOCK_24H	-0.192288	0.640482	0.83692	no	-0.192288	0.83692	Ubiquinone biosynthesis monooxygenase COQ6, mitochondrial (EC 1.14.13.-) (Coenzyme Q10 monooxygenase 6)
P97478	Coq7	COQ7_MOUSE	TB_24H-MOCK_24H	-0.118447	0.699625	0.869421	no	-0.118447	0.869421	5-demethoxyubiquinone hydroxylase, mitochondrial (DMQ hydroxylase) (EC 1.14.13.-) (Timing protein clk-1 homolog) (Ubiquinone biosynthesis monooxygenase COQ7)
Q566J8	Coq8b	COQ8B_MOUSE	TB_24H-MOCK_24H	0.0612119	0.851982	0.939608	no	0.0612119	0.939608	Atypical kinase COQ8B, mitochondrial (EC 2.7.-.-) (AarF domain-containing protein kinase 4) (Coenzyme Q protein 8B)
O89053	Coro1a	COR1A_MOUSE	TB_24H-MOCK_24H	-0.151448	0.0600441	0.218013	no	-0.151448	0.218013	Coronin-1A (Coronin-like protein A) (Clipin-A) (Coronin-like protein p57) (Tryptophan aspartate-containing coat protein) (TACO)
Q9WUM3	Coro1b	COR1B_MOUSE	TB_24H-MOCK_24H	0.355938	1.08372e-05	0.000227993	no	0.355938	0.000227993	Coronin-1B (Coronin-2)
Q9WUM4	Coro1c	COR1C_MOUSE	TB_24H-MOCK_24H	-0.0706661	0.456443	0.732326	no	-0.0706661	0.732326	Coronin-1C (Coronin-3)
Q8C0P5	Coro2a	COR2A_MOUSE	TB_24H-MOCK_24H	0.305962	0.0694051	0.240744	no	0.305962	0.240744	Coronin-2A
Q9D2V7	Coro7	CORO7_MOUSE	TB_24H-MOCK_24H	0.0178611	0.835893	0.931685	no	0.0178611	0.931685	Coronin-7 (Crn7) (70 kDa WD repeat tumor rejection antigen homolog)
Q9CQI6	Cotl1	COTL1_MOUSE	TB_24H-MOCK_24H	-0.0442724	0.818605	0.924048	no	-0.0442724	0.924048	Coactosin-like protein
P56394	Cox17	COX17_MOUSE	TB_24H-MOCK_24H	0.49007	0.195703	0.464725	no	0.49007	0.464725	Cytochrome c oxidase copper chaperone
P19783	Cox4i1	COX41_MOUSE	TB_24H-MOCK_24H	0.169696	0.402861	0.680696	no	0.169696	0.680696	Cytochrome c oxidase subunit 4 isoform 1, mitochondrial (Cytochrome c oxidase polypeptide IV) (Cytochrome c oxidase subunit IV isoform 1) (COX IV-1)
P12787	Cox5a	COX5A_MOUSE	TB_24H-MOCK_24H	0.183979	0.193699	0.461421	no	0.183979	0.461421	Cytochrome c oxidase subunit 5A, mitochondrial (Cytochrome c oxidase polypeptide Va)
P19536	Cox5b	COX5B_MOUSE	TB_24H-MOCK_24H	0.102927	0.768687	0.903331	no	0.102927	0.903331	Cytochrome c oxidase subunit 5B, mitochondrial (Cytochrome c oxidase polypeptide Vb)
P43024	Cox6a1	CX6A1_MOUSE	TB_24H-MOCK_24H	-0.665127	0.291104	0.574876	no	-0.665127	0.574876	Cytochrome c oxidase subunit 6A1, mitochondrial (Cytochrome c oxidase polypeptide VIa-liver)
P56391	Cox6b1	CX6B1_MOUSE	TB_24H-MOCK_24H	-0.388032	0.254085	0.536587	no	-0.388032	0.536587	Cytochrome c oxidase subunit 6B1 (Cytochrome c oxidase subunit VIb isoform 1) (COX VIb-1)
Q9CPQ1	Cox6c	COX6C_MOUSE	TB_24H-MOCK_24H	0.015053	0.902558	0.958406	no	0.015053	0.958406	Cytochrome c oxidase subunit 6C (Cytochrome c oxidase polypeptide VIc)
P48771	Cox7a2	CX7A2_MOUSE	TB_24H-MOCK_24H	-0.187295	0.446625	0.724804	no	-0.187295	0.724804	Cytochrome c oxidase subunit 7A2, mitochondrial (Cytochrome c oxidase subunit VIIa-liver/heart) (Cytochrome c oxidase subunit VIIa-L)
P17665	Cox7c	COX7C_MOUSE	TB_24H-MOCK_24H	0.0322805	0.846142	0.936368	no	0.0322805	0.936368	Cytochrome c oxidase subunit 7C, mitochondrial (Cytochrome c oxidase polypeptide VIIc)
O89001	Cpd	CBPD_MOUSE	TB_24H-MOCK_24H	-0.17004	0.461488	0.736365	no	-0.17004	0.736365	Carboxypeptidase D (EC 3.4.17.22) (Metallocarboxypeptidase D) (gp180)
Q8C166	Cpne1	CPNE1_MOUSE	TB_24H-MOCK_24H	-0.159908	0.47234	0.743868	no	-0.159908	0.743868	Copine-1 (Copine I)
P59108	Cpne2	CPNE2_MOUSE	TB_24H-MOCK_24H	#NUM!		0	yes	5.74153	0.0244308	Copine-2 (Copine II)
Q8BT60	Cpne3	CPNE3_MOUSE	TB_24H-MOCK_24H	0.214993	0.394509	0.676027	no	0.214993	0.676027	Copine-3 (Copine III)
P36552	Cpox	HEM6_MOUSE	TB_24H-MOCK_24H	-0.338359	0.231318	0.507589	no	-0.338359	0.507589	Oxygen-dependent coproporphyrinogen-III oxidase, mitochondrial (COX) (Coprogen oxidase) (Coproporphyrinogenase) (EC 1.3.3.3)
Q8BFS6	Cpped1	CPPED_MOUSE	TB_24H-MOCK_24H	-0.149703	0.602437	0.81756	no	-0.149703	0.81756	Serine/threonine-protein phosphatase CPPED1 (EC 3.1.3.16) (Calcineurin-like phosphoesterase domain-containing protein 1)
Q9EPU4	Cpsf1	CPSF1_MOUSE	TB_24H-MOCK_24H	0.140302	0.589161	0.809836	no	0.140302	0.809836	Cleavage and polyadenylation specificity factor subunit 1 (Cleavage and polyadenylation specificity factor 160 kDa subunit) (CPSF 160 kDa subunit)
O35218	Cpsf2	CPSF2_MOUSE	TB_24H-MOCK_24H	0.435852	0.0883598	0.280822	no	0.435852	0.280822	Cleavage and polyadenylation specificity factor subunit 2 (Cleavage and polyadenylation specificity factor 100 kDa subunit) (CPSF 100 kDa subunit)
Q9QXK7	Cpsf3	CPSF3_MOUSE	TB_24H-MOCK_24H	-0.301419	0.198493	0.467376	no	-0.301419	0.467376	Cleavage and polyadenylation specificity factor subunit 3 (EC 3.1.27.-) (Cleavage and polyadenylation specificity factor 73 kDa subunit) (CPSF 73 kDa subunit) (mRNA 3'-end-processing endonuclease CPSF-73)
Q9CWS4	Cpsf3l	INT11_MOUSE	TB_24H-MOCK_24H	0.191849	0.547035	0.786909	no	0.191849	0.786909	Integrator complex subunit 11 (Int11) (EC 3.1.27.-) (Cleavage and polyadenylation-specific factor 3-like protein) (CPSF3-like protein)
Q6NVF9	Cpsf6	CPSF6_MOUSE	TB_24H-MOCK_24H	-0.349915	0.246684	0.528453	no	-0.349915	0.528453	Cleavage and polyadenylation specificity factor subunit 6
Q8BTV2	Cpsf7	CPSF7_MOUSE	TB_24H-MOCK_24H	-0.283465	0.39147	0.672904	no	-0.283465	0.672904	Cleavage and polyadenylation specificity factor subunit 7
P97742	Cpt1a	CPT1A_MOUSE	TB_24H-MOCK_24H	0.389684	0.0988838	0.305003	no	0.389684	0.305003	Carnitine O-palmitoyltransferase 1, liver isoform (CPT1-L) (EC 2.3.1.21) (Carnitine O-palmitoyltransferase I, liver isoform) (CPT I) (CPTI-L) (Carnitine palmitoyltransferase 1A)
P52825	Cpt2	CPT2_MOUSE	TB_24H-MOCK_24H	-0.0229133	0.886283	0.951076	no	-0.0229133	0.951076	Carnitine O-palmitoyltransferase 2, mitochondrial (EC 2.3.1.21) (Carnitine palmitoyltransferase II) (CPT II)
Q64735	Cr1l	CR1L_MOUSE	TB_24H-MOCK_24H	-0.346215	0.229465	0.505468	no	-0.346215	0.505468	Complement component receptor 1-like protein (Complement regulatory protein Crry) (Protein p65)
P47934	Crat	CACP_MOUSE	TB_24H-MOCK_24H	-0.0633621	0.726147	0.881164	no	-0.0633621	0.881164	Carnitine O-acetyltransferase (Carnitine acetylase) (EC 2.3.1.7) (Carnitine acetyltransferase) (CAT) (CrAT)
Q01147	Creb1	CREB1_MOUSE	TB_24H-MOCK_24H	-0.03556	0.944966	0.978327	no	-0.03556	0.978327	Cyclic AMP-responsive element-binding protein 1 (CREB-1) (cAMP-responsive element-binding protein 1)
O88668	Creg1	CREG1_MOUSE	TB_24H-MOCK_24H	0.475474	0.0339984	0.147048	no	0.475474	0.147048	Protein CREG1 (Cellular repressor of E1A-stimulated genes 1)
Q91XD7	Creld1	CREL1_MOUSE	TB_24H-MOCK_24H	-0.212298	0.612406	0.823134	no	-0.212298	0.823134	Cysteine-rich with EGF-like domain protein 1
Q9CYA0	Creld2	CREL2_MOUSE	TB_24H-MOCK_24H	0.188975	0.579674	0.804733	no	0.188975	0.804733	Cysteine-rich with EGF-like domain protein 2
P63254	Crip1	CRIP1_MOUSE	TB_24H-MOCK_24H	-0.550253	0.428818	0.707817	no	-0.550253	0.707817	Cysteine-rich protein 1 (CRP-1) (Cysteine-rich intestinal protein) (CRIP)
Q64010	Crk	CRK_MOUSE	TB_24H-MOCK_24H	-0.0241804	0.946491	0.978493	no	-0.0241804	0.978493	Adapter molecule crk (Proto-oncogene c-Crk) (p38)
P47941	Crkl	CRKL_MOUSE	TB_24H-MOCK_24H	-0.129333	0.70659	0.872317	no	-0.129333	0.872317	Crk-like protein
Q8CII9	Crlf2	CRLF2_MOUSE	TB_24H-MOCK_24H	0.457119	0.170741	0.428901	no	0.457119	0.428901	Cytokine receptor-like factor 2 (Cytokine receptor-like molecule 2) (CRLM-2) (Thymic stromal lymphopoietin protein receptor) (TSLP receptor) (Type I cytokine receptor delta 1)
Q9Z2L7	Crlf3	CRLF3_MOUSE	TB_24H-MOCK_24H	0.560755	0.037794	0.158163	no	0.560755	0.158163	Cytokine receptor-like factor 3 (Cytokine receptor-like molecule 9) (CREME-9) (Cytokine receptor-related factor 4)
P63154	Crnkl1	CRNL1_MOUSE	TB_24H-MOCK_24H	-0.257972	0.204114	0.472847	no	-0.257972	0.472847	Crooked neck-like protein 1 (Crooked neck homolog)
Q8CJ40	Crocc	CROCC_MOUSE	TB_24H-MOCK_24H	0.0925595	0.827405	0.928103	no	0.0925595	0.928103	Rootletin (Ciliary rootlet coiled-coil protein)
Q9DC50	Crot	OCTC_MOUSE	TB_24H-MOCK_24H	-0.285628	0.446753	0.724804	no	-0.285628	0.724804	Peroxisomal carnitine O-octanoyltransferase (COT) (EC 2.3.1.137)
Q3U182	Crtc2	CRTC2_MOUSE	TB_24H-MOCK_24H	-0.14757	0.726389	0.881182	no	-0.14757	0.881182	CREB-regulated transcription coactivator 2 (Transducer of regulated cAMP response element-binding protein 2) (TORC-2) (Transducer of CREB protein 2)
Q99KP3	Cryl1	CRYL1_MOUSE	TB_24H-MOCK_24H	-0.287694	0.210845	0.481239	no	-0.287694	0.481239	Lambda-crystallin homolog (EC 1.1.1.45) (L-gulonate 3-dehydrogenase) (Gul3DH)
P47199	Cryz	QOR_MOUSE	TB_24H-MOCK_24H	-0.133894	0.565827	0.797349	no	-0.133894	0.797349	Quinone oxidoreductase (EC 1.6.5.5) (NADPH:quinone reductase) (Zeta-crystallin)
Q921W4	Cryzl1	QORL1_MOUSE	TB_24H-MOCK_24H	0.126691	0.480552	0.750996	no	0.126691	0.750996	Quinone oxidoreductase-like protein 1 (EC 1.-.-.-) (Quinone oxidoreductase homolog 1) (QOH-1) (Zeta-crystallin homolog)
Q9CZU6	Cs	CISY_MOUSE	TB_24H-MOCK_24H	0.0535085	0.584826	0.808233	no	0.0535085	0.808233	Citrate synthase, mitochondrial (EC 2.3.3.1) (Citrate (Si)-synthase)
Q91W50	Csde1	CSDE1_MOUSE	TB_24H-MOCK_24H	-0.483559	0.124421	0.3565	no	-0.483559	0.3565	Cold shock domain-containing protein E1
Q9ERK4	Cse1l	XPO2_MOUSE	TB_24H-MOCK_24H	-0.482301	0.00194419	0.0173809	no	-0.482301	0.0173809	Exportin-2 (Exp2) (Chromosome segregation 1-like protein) (Importin-alpha re-exporter)
P09581	Csf1r	CSF1R_MOUSE	TB_24H-MOCK_24H	-2.25813	1.3114e-12	1.53831e-10	no	-2.25813	1.53831e-10	Macrophage colony-stimulating factor 1 receptor (CSF-1 receptor) (CSF-1-R) (CSF-1R) (M-CSF-R) (EC 2.7.10.1) (Proto-oncogene c-Fms) (CD antigen CD115)
P41241	Csk	CSK_MOUSE	TB_24H-MOCK_24H	0.137508	0.316052	0.602383	no	0.137508	0.602383	Tyrosine-protein kinase CSK (EC 2.7.10.2) (C-Src kinase) (Protein-tyrosine kinase MPK-2) (p50CSK)
Q8BK63	Csnk1a1	KC1A_MOUSE	TB_24H-MOCK_24H	0.14926	0.450272	0.727464	no	0.14926	0.727464	Casein kinase I isoform alpha (CKI-alpha) (EC 2.7.11.1) (CK1)
Q9DC28	Csnk1d	KC1D_MOUSE	TB_24H-MOCK_24H	-0.205304	0.327517	0.61455	no	-0.205304	0.61455	Casein kinase I isoform delta (CKI-delta) (CKId) (EC 2.7.11.1) (Tau-protein kinase CSNK1D) (EC 2.7.11.26)
Q9JMK2	Csnk1e	KC1E_MOUSE	TB_24H-MOCK_24H	-0.915426	0.0426318	0.171904	no	-0.915426	0.171904	Casein kinase I isoform epsilon (CKI-epsilon) (CKIe) (EC 2.7.11.1)
Q60737	Csnk2a1	CSK21_MOUSE	TB_24H-MOCK_24H	-0.147298	0.401515	0.680203	no	-0.147298	0.680203	Casein kinase II subunit alpha (CK II alpha) (EC 2.7.11.1)
O54833	Csnk2a2	CSK22_MOUSE	TB_24H-MOCK_24H	-0.166987	0.390275	0.671313	no	-0.166987	0.671313	Casein kinase II subunit alpha' (CK II alpha') (EC 2.7.11.1)
P67871	Csnk2b	CSK2B_MOUSE	TB_24H-MOCK_24H	-0.0173525	0.883986	0.949907	no	-0.0173525	0.949907	Casein kinase II subunit beta (CK II beta) (Phosvitin)
Q8VHY0	Cspg4	CSPG4_MOUSE	TB_24H-MOCK_24H	-1.42649	0.0127004	0.073017	no	-1.42649	0.073017	Chondroitin sulfate proteoglycan 4 (Chondroitin sulfate proteoglycan NG2) (Proteoglycan AN2)
P97315	Csrp1	CSRP1_MOUSE	TB_24H-MOCK_24H	0.658242	0.208723	0.478088	no	0.658242	0.478088	Cysteine and glycine-rich protein 1 (Cysteine-rich protein 1) (CRP) (CRP1)
Q62426	Cstb	CYTB_MOUSE	TB_24H-MOCK_24H	-0.0955683	0.794289	0.914542	no	-0.0955683	0.914542	Cystatin-B (Stefin-B)
Q99LC2	Cstf1	CSTF1_MOUSE	TB_24H-MOCK_24H	-0.171961	0.493336	0.75993	no	-0.171961	0.75993	Cleavage stimulation factor subunit 1 (CF-1 50 kDa subunit) (Cleavage stimulation factor 50 kDa subunit) (CSTF 50 kDa subunit) (CstF-50)
Q8BIQ5	Cstf2	CSTF2_MOUSE	TB_24H-MOCK_24H	-0.19134	0.665355	0.849188	no	-0.19134	0.849188	Cleavage stimulation factor subunit 2 (CF-1 64 kDa subunit) (Cleavage stimulation factor 64 kDa subunit) (CSTF 64 kDa subunit) (CstF-64)
Q99LI7	Cstf3	CSTF3_MOUSE	TB_24H-MOCK_24H	-0.364605	0.267273	0.551204	no	-0.364605	0.551204	Cleavage stimulation factor subunit 3 (CF-1 77 kDa subunit) (Cleavage stimulation factor 77 kDa subunit) (CSTF 77 kDa subunit) (CstF-77)
O88712	Ctbp1	CTBP1_MOUSE	TB_24H-MOCK_24H	-0.0604387	0.868527	0.945926	no	-0.0604387	0.945926	C-terminal-binding protein 1 (CtBP1) (EC 1.1.1.-)
P56546	Ctbp2	CTBP2_MOUSE	TB_24H-MOCK_24H	-0.156142	0.799336	0.916342	no	-0.156142	0.916342	C-terminal-binding protein 2 (CtBP2)
Q61164	Ctcf	CTCF_MOUSE	TB_24H-MOCK_24H	-0.467118	0.516532	0.772261	no	-0.467118	0.772261	Transcriptional repressor CTCF (11-zinc finger protein) (CCCTC-binding factor) (CTCFL paralog)
Q7TSG2	Ctdp1	CTDP1_MOUSE	TB_24H-MOCK_24H	-0.305336	0.364628	0.653345	no	-0.305336	0.653345	RNA polymerase II subunit A C-terminal domain phosphatase (EC 3.1.3.16) (TFIIF-associating CTD phosphatase)
P58466	Ctdsp1	CTDS1_MOUSE	TB_24H-MOCK_24H	-0.370473	0.316968	0.603157	no	-0.370473	0.603157	Carboxy-terminal domain RNA polymerase II polypeptide A small phosphatase 1 (EC 3.1.3.16) (Golli-interacting protein) (GIP) (Nuclear LIM interactor-interacting factor 3) (NLI-interacting factor 3) (Small C-terminal domain phosphatase 1) (SCP1) (Small CTD phosphatase 1)
P26231	Ctnna1	CTNA1_MOUSE	TB_24H-MOCK_24H	-0.48355	0.128653	0.363645	no	-0.48355	0.363645	Catenin alpha-1 (102 kDa cadherin-associated protein) (Alpha E-catenin) (CAP102)
Q9CWL8	Ctnnbl1	CTBL1_MOUSE	TB_24H-MOCK_24H	-0.335069	0.173753	0.433375	no	-0.335069	0.433375	Beta-catenin-like protein 1 (Nuclear-associated protein) (NAP)
P30999	Ctnnd1	CTND1_MOUSE	TB_24H-MOCK_24H	-0.316546	0.128553	0.363645	no	-0.316546	0.363645	Catenin delta-1 (Cadherin-associated Src substrate) (CAS) (p120 catenin) (p120(ctn)) (p120(cas))
P70698	Ctps1	PYRG1_MOUSE	TB_24H-MOCK_24H	-1.01271	0.000181687	0.00246776	no	-1.01271	0.00246776	CTP synthase 1 (EC 6.3.4.2) (CTP synthetase 1) (UTP--ammonia ligase 1)
P70303	Ctps2	PYRG2_MOUSE	TB_24H-MOCK_24H	0.140998	0.401934	0.680206	no	0.140998	0.680206	CTP synthase 2 (EC 6.3.4.2) (CTP synthetase 2) (CTPsH) (UTP--ammonia ligase 2)
P16675	Ctsa	PPGB_MOUSE	TB_24H-MOCK_24H	0.187683	0.518062	0.772261	no	0.187683	0.772261	Lysosomal protective protein (EC 3.4.16.5) (Carboxypeptidase C) (Carboxypeptidase L) (Cathepsin A) (Protective protein cathepsin A) (PPCA) (Protective protein for beta-galactosidase) [Cleaved into: Lysosomal protective protein 32 kDa chain; Lysosomal protective protein 20 kDa chain]
P10605	Ctsb	CATB_MOUSE	TB_24H-MOCK_24H	0.205982	0.491892	0.759519	no	0.205982	0.759519	Cathepsin B (EC 3.4.22.1) (Cathepsin B1) [Cleaved into: Cathepsin B light chain; Cathepsin B heavy chain]
P97821	Ctsc	CATC_MOUSE	TB_24H-MOCK_24H	0.986989	6.68897e-06	0.00015017	no	0.986989	0.00015017	Dipeptidyl peptidase 1 (EC 3.4.14.1) (Cathepsin C) (Cathepsin J) (Dipeptidyl peptidase I) (DPP-I) (DPPI) (Dipeptidyl transferase) [Cleaved into: Dipeptidyl peptidase 1 exclusion domain chain (Dipeptidyl peptidase I exclusion domain chain); Dipeptidyl peptidase 1 heavy chain (Dipeptidyl peptidase I heavy chain); Dipeptidyl peptidase 1 light chain (Dipeptidyl peptidase I light chain)]
P18242	Ctsd	CATD_MOUSE	TB_24H-MOCK_24H	0.180841	0.396963	0.677268	no	0.180841	0.677268	Cathepsin D (EC 3.4.23.5)
P49935	Ctsh	CATH_MOUSE	TB_24H-MOCK_24H	0.755158	0.000591942	0.00655319	no	0.755158	0.00655319	Pro-cathepsin H (Cathepsin B3) (Cathepsin BA) [Cleaved into: Cathepsin H mini chain; Cathepsin H (EC 3.4.22.16); Cathepsin H heavy chain; Cathepsin H light chain]
P06797	Ctsl	CATL1_MOUSE	TB_24H-MOCK_24H	1.15377	0.00852813	0.0542075	no	1.15377	0.0542075	Cathepsin L1 (EC 3.4.22.15) (Cathepsin L) (Major excreted protein) (MEP) (p39 cysteine proteinase) [Cleaved into: Cathepsin L1 heavy chain; Cathepsin L1 light chain]
O70370	Ctss	CATS_MOUSE	TB_24H-MOCK_24H	0.465988	0.0372182	0.15643	no	0.465988	0.15643	Cathepsin S (EC 3.4.22.27)
Q9WUU7	Ctsz	CATZ_MOUSE	TB_24H-MOCK_24H	0.545031	0.167098	0.423742	no	0.545031	0.423742	Cathepsin Z (EC 3.4.18.1)
Q99LJ0	Cttnbp2nl	CT2NL_MOUSE	TB_24H-MOCK_24H	-0.257726	0.0596791	0.217531	no	-0.257726	0.217531	CTTNBP2 N-terminal-like protein
Q3U308	Ctu2	CTU2_MOUSE	TB_24H-MOCK_24H	0.0616733	0.823124	0.926523	no	0.0616733	0.926523	Cytoplasmic tRNA 2-thiolation protein 2
Q9WTX6	Cul1	CUL1_MOUSE	TB_24H-MOCK_24H	-0.245464	0.0870638	0.278771	no	-0.245464	0.278771	Cullin-1 (CUL-1)
Q9D4H8	Cul2	CUL2_MOUSE	TB_24H-MOCK_24H	-0.105131	0.546404	0.786878	no	-0.105131	0.786878	Cullin-2 (CUL-2)
Q9JLV5	Cul3	CUL3_MOUSE	TB_24H-MOCK_24H	0.252852	0.147505	0.396247	no	0.252852	0.396247	Cullin-3 (CUL-3)
Q3TCH7	Cul4a	CUL4A_MOUSE	TB_24H-MOCK_24H	-0.0115679	0.965499	0.987436	no	-0.0115679	0.987436	Cullin-4A (CUL-4A)
A2A432	Cul4b	CUL4B_MOUSE	TB_24H-MOCK_24H	-0.32803	0.396221	0.67658	no	-0.32803	0.67658	Cullin-4B (CUL-4B)
Q9D5V5	Cul5	CUL5_MOUSE	TB_24H-MOCK_24H	-0.0161915	0.943013	0.977694	no	-0.0161915	0.977694	Cullin-5 (CUL-5)
Q9D8X1	Cutc	CUTC_MOUSE	TB_24H-MOCK_24H	0.254754	0.249366	0.531248	no	0.254754	0.531248	Copper homeostasis protein cutC homolog
P53564	Cux1	CUX1_MOUSE	TB_24H-MOCK_24H	-0.8021	0.0177953	0.0930888	no	-0.8021	0.0930888	Homeobox protein cut-like 1 (CCAAT displacement protein) (CDP) (Homeobox protein cux-1)
P70403	Cux1	CASP_MOUSE	TB_24H-MOCK_24H	-0.353429	0.155747	0.408023	no	-0.353429	0.408023	Protein CASP
Q8BG79	Cwf19l2	C19L2_MOUSE	TB_24H-MOCK_24H	-0.214961	0.556802	0.792317	no	-0.214961	0.792317	CWF19-like protein 2
P17515	Cxcl10	CXL10_MOUSE	TB_24H-MOCK_24H	#NUM!		0	yes	5.39836	0.0149015	C-X-C motif chemokine 10 (10 kDa interferon gamma-induced protein) (Gamma-IP10) (IP-10) (C7) (Interferon-gamma induced protein CRG-2) (Small-inducible cytokine B10)
P70658	Cxcr4	CXCR4_MOUSE	TB_24H-MOCK_24H	#NUM!		0	yes	-3.14958	0.0444805	C-X-C chemokine receptor type 4 (CXC-R4) (CXCR-4) (Fusin) (Leukocyte-derived seven transmembrane domain receptor) (LESTR) (Pre-B-cell-derived chemokine receptor) (PB-CKR) (Stromal cell-derived factor 1 receptor) (SDF-1 receptor) (CD antigen CD184)
P56395	Cyb5a	CYB5_MOUSE	TB_24H-MOCK_24H	0.0259752	0.924319	0.96961	no	0.0259752	0.96961	Cytochrome b5
Q9CQX2	Cyb5b	CYB5B_MOUSE	TB_24H-MOCK_24H	0.12501	0.652306	0.842535	no	0.12501	0.842535	Cytochrome b5 type B (Cytochrome b5 outer mitochondrial membrane isoform)
Q9DB73	Cyb5r1	NB5R1_MOUSE	TB_24H-MOCK_24H	-0.189666	0.176915	0.438718	no	-0.189666	0.438718	NADH-cytochrome b5 reductase 1 (b5R.1) (EC 1.6.2.2) (NAD(P)H:quinone oxidoreductase type 3 polypeptide A2)
Q9DCN2	Cyb5r3	NB5R3_MOUSE	TB_24H-MOCK_24H	0.0776402	0.524364	0.77482	no	0.0776402	0.77482	NADH-cytochrome b5 reductase 3 (B5R) (Cytochrome b5 reductase) (EC 1.6.2.2) (Diaphorase-1) [Cleaved into: NADH-cytochrome b5 reductase 3 membrane-bound form; NADH-cytochrome b5 reductase 3 soluble form]
Q61462	Cyba	CY24A_MOUSE	TB_24H-MOCK_24H	0.708609	0.000668633	0.00722983	no	0.708609	0.00722983	Cytochrome b-245 light chain (Cytochrome b(558) alpha chain) (Cytochrome b558 subunit alpha) (Neutrophil cytochrome b 22 kDa polypeptide) (Superoxide-generating NADPH oxidase light chain subunit) (p22 phagocyte B-cytochrome) (p22-phox) (p22phox)
Q61093	Cybb	CY24B_MOUSE	TB_24H-MOCK_24H	0.876263	4.65345e-05	0.000807781	no	0.876263	0.000807781	Cytochrome b-245 heavy chain (EC 1.-.-.-) (CGD91-phox) (Cytochrome b(558) subunit beta) (Cytochrome b558 subunit beta) (Heme-binding membrane glycoprotein gp91phox) (Neutrophil cytochrome b 91 kDa polypeptide) (gp91-1) (gp91-phox) (p22 phagocyte B-cytochrome)
Q9D0M3	Cyc1	CY1_MOUSE	TB_24H-MOCK_24H	0.152023	0.540377	0.783789	no	0.152023	0.783789	Cytochrome c1, heme protein, mitochondrial (Complex III subunit 4) (Complex III subunit IV) (Cytochrome b-c1 complex subunit 4) (Ubiquinol-cytochrome-c reductase complex cytochrome c1 subunit) (Cytochrome c-1)
P62897	Cycs	CYC_MOUSE	TB_24H-MOCK_24H	0.56421	0.339406	0.626235	no	0.56421	0.626235	Cytochrome c, somatic
Q7TMB8	Cyfip1	CYFP1_MOUSE	TB_24H-MOCK_24H	0.0872625	0.638057	0.83692	no	0.0872625	0.83692	Cytoplasmic FMR1-interacting protein 1 (Specifically Rac1-associated protein 1) (Sra-1)
Q5SQX6	Cyfip2	CYFP2_MOUSE	TB_24H-MOCK_24H	-0.0717202	0.596098	0.814594	no	-0.0717202	0.814594	Cytoplasmic FMR1-interacting protein 2 (p53-inducible protein 121)
Q9QXA1	Cyhr1	CYHR1_MOUSE	TB_24H-MOCK_24H	0.269769	0.170637	0.428901	no	0.269769	0.428901	Cysteine and histidine-rich protein 1
Q8BKE6	Cyp20a1	CP20A_MOUSE	TB_24H-MOCK_24H	-0.304106	0.488028	0.757163	no	-0.304106	0.757163	Cytochrome P450 20A1 (EC 1.14.-.-)
Q9DBW0	Cyp4v2	CP4V2_MOUSE	TB_24H-MOCK_24H	0.668695	0.0566702	0.209522	no	0.668695	0.209522	Cytochrome P450 4V2 (EC 1.14.13.-) (Docosahexaenoic acid omega-hydroxylase CYP4V2) (EC 1.14.13.199)
Q8K0C4	Cyp51a1	CP51A_MOUSE	TB_24H-MOCK_24H	0.218292	0.673683	0.852732	no	0.218292	0.852732	Lanosterol 14-alpha demethylase (LDM) (EC 1.14.13.70) (CYPLI) (Cytochrome P450 51A1) (Cytochrome P450-14DM) (Cytochrome P45014DM) (Cytochrome P450LI) (Sterol 14-alpha demethylase)
Q80YW0	Cyth4	CYH4_MOUSE	TB_24H-MOCK_24H	-0.123361	0.646238	0.840035	no	-0.123361	0.840035	Cytohesin-4 (PH, SEC7 and coiled-coil domain-containing protein 4)
Q9D172	D10Jhu81e	ES1_MOUSE	TB_24H-MOCK_24H	-0.0345945	0.765062	0.901369	no	-0.0345945	0.901369	ES1 protein homolog, mitochondrial
Q3UHX9	D2Wsu81e	CI114_MOUSE	TB_24H-MOCK_24H	2.14333	0.0516756	0.196307	no	2.14333	0.196307	Putative methyltransferase C9orf114 homolog (EC 2.1.1.-)
Q8R1F0	D8Ertd738e	L10K_MOUSE	TB_24H-MOCK_24H	-0.749697	4.36736e-05	0.000771782	no	-0.749697	0.000771782	Leydig cell tumor 10 kDa protein homolog
P98078	Dab2	DAB2_MOUSE	TB_24H-MOCK_24H	-0.735941	0.0473464	0.184943	no	-0.735941	0.184943	Disabled homolog 2 (Adaptor molecule disabled-2) (Differentially expressed in ovarian carcinoma 2) (DOC-2) (Mitogen-responsive phosphoprotein)
P61804	Dad1	DAD1_MOUSE	TB_24H-MOCK_24H	0.0979057	0.784801	0.909065	no	0.0979057	0.909065	Dolichyl-diphosphooligosaccharide--protein glycosyltransferase subunit DAD1 (Oligosaccharyl transferase subunit DAD1) (EC 2.4.99.18) (Defender against cell death 1) (DAD-1)
Q91WC9	Daglb	DGLB_MOUSE	TB_24H-MOCK_24H	-1.16826	1.0257e-07	3.74575e-06	no	-1.16826	3.74575e-06	Sn1-specific diacylglycerol lipase beta (DGL-beta) (EC 3.1.1.-)
Q9ER88	Dap3	RT29_MOUSE	TB_24H-MOCK_24H	-0.749826	0.00764556	0.0494916	no	-0.749826	0.0494916	28S ribosomal protein S29, mitochondrial (MRP-S29) (S29mt) (Death-associated protein 3) (DAP-3)
Q922B2	Dars	SYDC_MOUSE	TB_24H-MOCK_24H	-0.311814	0.153293	0.403945	no	-0.311814	0.403945	Aspartate--tRNA ligase, cytoplasmic (EC 6.1.1.12) (Aspartyl-tRNA synthetase) (AspRS)
O35613	Daxx	DAXX_MOUSE	TB_24H-MOCK_24H	2.10465	3.29203e-07	1.07995e-05	no	2.10465	1.07995e-05	Death domain-associated protein 6 (Daxx)
Q9JII5	Dazap1	DAZP1_MOUSE	TB_24H-MOCK_24H	-0.418382	0.347876	0.636103	no	-0.418382	0.636103	DAZ-associated protein 1 (Deleted in azoospermia-associated protein 1)
Q62418	Dbnl	DBNL_MOUSE	TB_24H-MOCK_24H	0.589937	0.00413795	0.0307447	no	0.589937	0.0307447	Drebrin-like protein (Actin-binding protein 1) (SH3 domain-containing protein 7)
Q923B1	Dbr1	DBR1_MOUSE	TB_24H-MOCK_24H	-0.476852	0.200947	0.469741	no	-0.476852	0.469741	Lariat debranching enzyme (EC 3.1.-.-)
P53395	Dbt	ODB2_MOUSE	TB_24H-MOCK_24H	0.0431442	0.773538	0.904915	no	0.0431442	0.904915	Lipoamide acyltransferase component of branched-chain alpha-keto acid dehydrogenase complex, mitochondrial (EC 2.3.1.168) (Branched-chain alpha-keto acid dehydrogenase complex component E2) (BCKAD-E2) (BCKADE2) (Dihydrolipoamide acetyltransferase component of branched-chain alpha-keto acid dehydrogenase complex) (Dihydrolipoamide branched chain transacylase) (Dihydrolipoyllysine-residue (2-methyl…
P61963	Dcaf7	DCAF7_MOUSE	TB_24H-MOCK_24H	-0.400783	0.24142	0.522672	no	-0.400783	0.522672	DDB1- and CUL4-associated factor 7 (WD repeat-containing protein 68) (WD repeat-containing protein An11 homolog)
Q8N7N5	Dcaf8	DCAF8_MOUSE	TB_24H-MOCK_24H	-0.980708	0.00752841	0.0490614	no	-0.980708	0.0490614	DDB1- and CUL4-associated factor 8 (WD repeat-containing protein 42A)
Q8BHC4	Dcakd	DCAKD_MOUSE	TB_24H-MOCK_24H	-0.027932	0.872377	0.945978	no	-0.027932	0.945978	Dephospho-CoA kinase domain-containing protein
P43346	Dck	DCK_MOUSE	TB_24H-MOCK_24H	1.721	8.92434e-07	2.54016e-05	no	1.721	2.54016e-05	Deoxycytidine kinase (dCK) (EC 2.7.1.74)
Q91YD3	Dcp1a	DCP1A_MOUSE	TB_24H-MOCK_24H	0.0856056	0.786848	0.910287	no	0.0856056	0.910287	mRNA-decapping enzyme 1A (EC 3.-.-.-) (MAD homolog 4-interacting transcription coactivator 1) (Smad4-interacting transcriptional co-activator) (Transcription factor SMIF)
Q3U564	Dcp1b	DCP1B_MOUSE	TB_24H-MOCK_24H	-0.501904	0.154416	0.406077	no	-0.501904	0.406077	mRNA-decapping enzyme 1B (EC 3.-.-.-)
Q9DAR7	Dcps	DCPS_MOUSE	TB_24H-MOCK_24H	-0.0896616	0.699853	0.869421	no	-0.0896616	0.869421	m7GpppX diphosphatase (EC 3.6.1.59) (DCS-1) (Decapping scavenger enzyme) (Hint-related 7meGMP-directed hydrolase) (Histidine triad nucleotide-binding protein 5) (Histidine triad protein member 5) (HINT-5) (Scavenger mRNA-decapping enzyme DcpS)
O08788	Dctn1	DCTN1_MOUSE	TB_24H-MOCK_24H	-0.0726701	0.33677	0.62375	no	-0.0726701	0.62375	Dynactin subunit 1 (150 kDa dynein-associated polypeptide) (DAP-150) (DP-150) (p150-glued)
Q99KJ8	Dctn2	DCTN2_MOUSE	TB_24H-MOCK_24H	-0.0570657	0.667014	0.849871	no	-0.0570657	0.849871	Dynactin subunit 2 (50 kDa dynein-associated polypeptide) (Dynactin complex 50 kDa subunit) (DCTN-50) (Growth cone membrane protein 23-48K) (GMP23-48K) (p50 dynamitin)
Q9Z0Y1	Dctn3	DCTN3_MOUSE	TB_24H-MOCK_24H	-0.00607451	0.973951	0.992148	no	-0.00607451	0.992148	Dynactin subunit 3 (Dynactin light chain p24)
Q8CBY8	Dctn4	DCTN4_MOUSE	TB_24H-MOCK_24H	0.0735027	0.604273	0.818006	no	0.0735027	0.818006	Dynactin subunit 4 (Dynactin subunit p62)
Q9QZ73	Dcun1d1	DCNL1_MOUSE	TB_24H-MOCK_24H	-0.278386	0.424835	0.704421	no	-0.278386	0.704421	DCN1-like protein 1 (DCUN1 domain-containing protein 1) (Defective in cullin neddylation protein 1-like protein 1) (Testis-specific protein 3)
Q91X52	Dcxr	DCXR_MOUSE	TB_24H-MOCK_24H	-0.0618162	0.746556	0.890851	no	-0.0618162	0.890851	L-xylulose reductase (XR) (EC 1.1.1.10) (Dicarbonyl/L-xylulose reductase)
Q99LD8	Ddah2	DDAH2_MOUSE	TB_24H-MOCK_24H	-0.212832	0.463485	0.73746	no	-0.212832	0.73746	N(G),N(G)-dimethylarginine dimethylaminohydrolase 2 (DDAH-2) (Dimethylarginine dimethylaminohydrolase 2) (EC 3.5.3.18) (DDAHII) (Dimethylargininase-2)
Q3U1J4	Ddb1	DDB1_MOUSE	TB_24H-MOCK_24H	-0.787549	0.00181571	0.0164778	no	-0.787549	0.0164778	DNA damage-binding protein 1 (DDB p127 subunit) (Damage-specific DNA-binding protein 1) (UV-damaged DNA-binding factor)
Q80Y98	Ddhd2	DDHD2_MOUSE	TB_24H-MOCK_24H	-0.684249	0.0398188	0.163618	no	-0.684249	0.163618	Phospholipase DDHD2 (EC 3.1.1.-) (DDHD domain-containing protein 2) (SAM, WWE and DDHD domain-containing protein 1)
A2ADY9	Ddi2	DDI2_MOUSE	TB_24H-MOCK_24H	-0.389424	0.0386277	0.160956	no	-0.389424	0.160956	Protein DDI1 homolog 2
O54734	Ddost	OST48_MOUSE	TB_24H-MOCK_24H	0.072918	0.575117	0.802201	no	0.072918	0.802201	Dolichyl-diphosphooligosaccharide--protein glycosyltransferase 48 kDa subunit (DDOST 48 kDa subunit) (Oligosaccharyl transferase 48 kDa subunit) (EC 2.4.99.18)
Q80WW9	Ddrgk1	DDRGK_MOUSE	TB_24H-MOCK_24H	-0.356675	0.199735	0.469424	no	-0.356675	0.469424	DDRGK domain-containing protein 1 (UFM1-binding and PCI domain-containing protein 1)
O35215	Ddt	DOPD_MOUSE	TB_24H-MOCK_24H	0.535118	0.173091	0.432561	no	0.535118	0.432561	D-dopachrome decarboxylase (EC 4.1.1.84) (D-dopachrome tautomerase)
Q91VR5	Ddx1	DDX1_MOUSE	TB_24H-MOCK_24H	-0.293537	0.201739	0.470295	no	-0.293537	0.470295	ATP-dependent RNA helicase DDX1 (EC 3.6.4.13) (DEAD box protein 1)
Q501J6	Ddx17	DDX17_MOUSE	TB_24H-MOCK_24H	0.051995	0.728958	0.882087	no	0.051995	0.882087	Probable ATP-dependent RNA helicase DDX17 (EC 3.6.4.13) (DEAD box protein 17)
Q8K363	Ddx18	DDX18_MOUSE	TB_24H-MOCK_24H	-0.197508	0.693291	0.86447	no	-0.197508	0.86447	ATP-dependent RNA helicase DDX18 (EC 3.6.4.13) (DEAD box protein 18)
Q61655	Ddx19a	DD19A_MOUSE	TB_24H-MOCK_24H	-0.19069	0.32396	0.610575	no	-0.19069	0.610575	ATP-dependent RNA helicase DDX19A (EC 3.6.4.13) (DEAD box RNA helicase DEAD5) (mDEAD5) (DEAD box protein 19A) (Eukaryotic translation initiation factor 4A-related sequence 1)
Q9JIK5	Ddx21	DDX21_MOUSE	TB_24H-MOCK_24H	-1.15594	2.86433e-09	1.70582e-07	no	-1.15594	1.70582e-07	Nucleolar RNA helicase 2 (EC 3.6.4.13) (DEAD box protein 21) (Gu-alpha) (Nucleolar RNA helicase Gu) (Nucleolar RNA helicase II) (RH II/Gu)
Q9ESV0	Ddx24	DDX24_MOUSE	TB_24H-MOCK_24H	0.265592	0.576731	0.802977	no	0.265592	0.802977	ATP-dependent RNA helicase DDX24 (EC 3.6.4.13) (DEAD box protein 24)
Q8VDW0	Ddx39a	DX39A_MOUSE	TB_24H-MOCK_24H	0.00378484	0.983314	0.992839	no	0.00378484	0.992839	ATP-dependent RNA helicase DDX39A (EC 3.6.4.13) (DEAD box protein 39)
Q9Z1N5	Ddx39b	DX39B_MOUSE	TB_24H-MOCK_24H	-0.0545994	0.801166	0.916464	no	-0.0545994	0.916464	Spliceosome RNA helicase Ddx39b (EC 3.6.4.13) (56 kDa U2AF65-associated protein) (DEAD box protein UAP56) (HLA-B-associated transcript 1 protein)
Q62167	Ddx3x	DDX3X_MOUSE	TB_24H-MOCK_24H	-0.190141	0.334949	0.62157	no	-0.190141	0.62157	ATP-dependent RNA helicase DDX3X (EC 3.6.4.13) (D1Pas1-related sequence 2) (DEAD box RNA helicase DEAD3) (mDEAD3) (DEAD box protein 3, X-chromosomal) (Embryonic RNA helicase)
Q62095	Ddx3y	DDX3Y_MOUSE	TB_24H-MOCK_24H	-0.60245	0.00692803	0.0455054	no	-0.60245	0.0455054	ATP-dependent RNA helicase DDX3Y (EC 3.6.4.13) (D1Pas1-related sequence 1) (DEAD box protein 3, Y-chromosomal) (DEAD-box RNA helicase DEAD2) (mDEAD2)
Q810A7	Ddx42	DDX42_MOUSE	TB_24H-MOCK_24H	-0.35956	0.320772	0.6066	no	-0.35956	0.6066	ATP-dependent RNA helicase DDX42 (EC 3.6.4.13) (DEAD box protein 42)
Q569Z5	Ddx46	DDX46_MOUSE	TB_24H-MOCK_24H	-0.360279	0.0701363	0.241546	no	-0.360279	0.241546	Probable ATP-dependent RNA helicase DDX46 (EC 3.6.4.13) (DEAD box protein 46)
Q61656	Ddx5	DDX5_MOUSE	TB_24H-MOCK_24H	-0.251415	0.0115428	0.0684262	no	-0.251415	0.0684262	Probable ATP-dependent RNA helicase DDX5 (EC 3.6.4.13) (DEAD box RNA helicase DEAD1) (mDEAD1) (DEAD box protein 5) (RNA helicase p68)
Q6P9R1	Ddx51	DDX51_MOUSE	TB_24H-MOCK_24H	#NUM!		0	yes	-4.17681	0.0356779	ATP-dependent RNA helicase DDX51 (EC 3.6.4.13) (DEAD box protein 51)
Q8K4L0	Ddx54	DDX54_MOUSE	TB_24H-MOCK_24H	-0.578441	0.00310813	0.0250137	no	-0.578441	0.0250137	ATP-dependent RNA helicase DDX54 (EC 3.6.4.13) (DEAD box protein 54)
Q9D0R4	Ddx56	DDX56_MOUSE	TB_24H-MOCK_24H	-1.50012	0.000133843	0.00191464	no	-1.50012	0.00191464	Probable ATP-dependent RNA helicase DDX56 (EC 3.6.4.13) (ATP-dependent 61 kDa nucleolar RNA helicase) (DEAD box protein 56)
Q6Q899	Ddx58	DDX58_MOUSE	TB_24H-MOCK_24H	1.47531	5.74727e-11	4.94393e-09	no	1.47531	4.94393e-09	Probable ATP-dependent RNA helicase DDX58 (EC 3.6.4.13) (DEAD box protein 58) (RIG-I-like receptor 1) (RLR-1) (Retinoic acid-inducible gene 1 protein) (RIG-1) (Retinoic acid-inducible gene I protein) (RIG-I)
P54823	Ddx6	DDX6_MOUSE	TB_24H-MOCK_24H	0.115913	0.642019	0.837632	no	0.115913	0.837632	Probable ATP-dependent RNA helicase DDX6 (EC 3.6.4.13) (ATP-dependent RNA helicase p54) (DEAD box protein 6) (Oncogene RCK homolog)
Q9CQ62	Decr1	DECR_MOUSE	TB_24H-MOCK_24H	0.0333591	0.855273	0.941532	no	0.0333591	0.941532	2,4-dienoyl-CoA reductase, mitochondrial (EC 1.3.1.34) (2,4-dienoyl-CoA reductase [NADPH]) (4-enoyl-CoA reductase [NADPH])
Q8C2K1	Def6	DEFI6_MOUSE	TB_24H-MOCK_24H	-0.563886	0.075935	0.25672	no	-0.563886	0.25672	Differentially expressed in FDCP 6 (DEF-6) (IRF4-binding protein) (SWAP-70-like adapter of T-cells)
O09005	Degs1	DEGS1_MOUSE	TB_24H-MOCK_24H	0.266894	0.560425	0.794575	no	0.266894	0.794575	Sphingolipid delta(4)-desaturase DES1 (EC 1.14.19.17) (Degenerative spermatocyte homolog 1)
Q7TNV0	Dek	DEK_MOUSE	TB_24H-MOCK_24H	-0.894991	0.0477002	0.185523	no	-0.894991	0.185523	Protein DEK
Q8K382	Dennd1a	DEN1A_MOUSE	TB_24H-MOCK_24H	0.263344	0.486592	0.756465	no	0.263344	0.756465	DENN domain-containing protein 1A (Connecdenn 1) (Connecdenn)
Q8CFK6	Dennd1c	DEN1C_MOUSE	TB_24H-MOCK_24H	0.933171	0.0162858	0.0874132	no	0.933171	0.0874132	DENN domain-containing protein 1C (Connecdenn 3)
Q3U1Y4	Dennd4b	DEN4B_MOUSE	TB_24H-MOCK_24H	0.0656661	0.541647	0.783789	no	0.0656661	0.783789	DENN domain-containing protein 4B (Brain-specific gene 4 protein) (Brain specific protein 4)
A6H8H2	Dennd4c	DEN4C_MOUSE	TB_24H-MOCK_24H	-0.220009	0.0771261	0.258948	no	-0.220009	0.258948	DENN domain-containing protein 4C
Q9CQJ6	Denr	DENR_MOUSE	TB_24H-MOCK_24H	-0.265537	0.525259	0.775216	no	-0.265537	0.775216	Density-regulated protein (DRP)
Q91YP3	Dera	DEOC_MOUSE	TB_24H-MOCK_24H	-0.146096	0.457403	0.732563	no	-0.146096	0.732563	Deoxyribose-phosphate aldolase (DERA) (EC 4.1.2.4) (2-deoxy-D-ribose 5-phosphate aldolase) (Phosphodeoxyriboaldolase) (Deoxyriboaldolase)
Q8BNI4	Derl2	DERL2_MOUSE	TB_24H-MOCK_24H	-0.0138833	0.937093	0.975575	no	-0.0138833	0.975575	Derlin-2 (Degradation in endoplasmic reticulum protein 2) (Der1-like protein 2) (F-LANa)
O54786	Dffa	DFFA_MOUSE	TB_24H-MOCK_24H	0.0900465	0.870635	0.945978	no	0.0900465	0.945978	DNA fragmentation factor subunit alpha (DNA fragmentation factor 45 kDa subunit) (DFF-45) (Inhibitor of CAD) (ICAD)
O70279	Dgcr14	DGC14_MOUSE	TB_24H-MOCK_24H	-0.458833	0.179109	0.441894	no	-0.458833	0.441894	Protein DGCR14 (DiGeorge syndrome critical region 14 homolog) (ES2 protein) (Expressed sequence 2 embryonic lethal)
Q80UP3	Dgkz	DGKZ_MOUSE	TB_24H-MOCK_24H	0.0952024	0.80666	0.9203	no	0.0952024	0.9203	Diacylglycerol kinase zeta (DAG kinase zeta) (EC 2.7.1.107) (Diglyceride kinase zeta) (DGK-zeta)
Q9QX60	Dguok	DGUOK_MOUSE	TB_24H-MOCK_24H	0.0418637	0.85801	0.943032	no	0.0418637	0.943032	Deoxyguanosine kinase, mitochondrial (dGK) (EC 2.7.1.113)
Q9DBB8	Dhdh	DHDH_MOUSE	TB_24H-MOCK_24H	-0.398964	0.256359	0.539622	no	-0.398964	0.539622	Trans-1,2-dihydrobenzene-1,2-diol dehydrogenase (EC 1.3.1.20) (D-xylose 1-dehydrogenase) (D-xylose-NADP dehydrogenase) (EC 1.1.1.179) (Dimeric dihydrodiol dehydrogenase)
P00375	Dhfr	DYR_MOUSE	TB_24H-MOCK_24H	-0.441296	0.216507	0.486723	no	-0.441296	0.486723	Dihydrofolate reductase (EC 1.5.1.3)
O35435	Dhodh	PYRD_MOUSE	TB_24H-MOCK_24H	-0.0151474	0.950629	0.979474	no	-0.0151474	0.979474	Dihydroorotate dehydrogenase (quinone), mitochondrial (DHOdehase) (EC 1.3.5.2) (Dihydroorotate oxidase)
Q99L04	Dhrs1	DHRS1_MOUSE	TB_24H-MOCK_24H	-0.109886	0.33909	0.626163	no	-0.109886	0.626163	Dehydrogenase/reductase SDR family member 1 (EC 1.1.-.-)
O88876	Dhrs3	DHRS3_MOUSE	TB_24H-MOCK_24H	-0.923608	0.000682745	0.00730085	no	-0.923608	0.00730085	Short-chain dehydrogenase/reductase 3 (EC 1.1.1.300) (Retinal short-chain dehydrogenase/reductase 1) (retSDR1)
Q99LB2	Dhrs4	DHRS4_MOUSE	TB_24H-MOCK_24H	-0.197066	0.500214	0.764532	no	-0.197066	0.764532	Dehydrogenase/reductase SDR family member 4 (EC 1.1.1.184) (NADPH-dependent carbonyl reductase/NADP-retinol dehydrogenase) (CR) (PHCR) (NADPH-dependent retinol dehydrogenase/reductase) (NDRD) (mouNRDR) (Peroxisomal short-chain alcohol dehydrogenase) (PSCD)
Q9CXR1	Dhrs7	DHRS7_MOUSE	TB_24H-MOCK_24H	-0.2551	0.252734	0.534828	no	-0.2551	0.534828	Dehydrogenase/reductase SDR family member 7 (EC 1.1.-.-) (Retinal short-chain dehydrogenase/reductase 4) (retSDR4)
Q99J47	Dhrs7b	DRS7B_MOUSE	TB_24H-MOCK_24H	-0.278688	0.38136	0.666168	no	-0.278688	0.666168	Dehydrogenase/reductase SDR family member 7B (EC 1.1.-.-) (Short-chain dehydrogenase/reductase family 32C member 1)
O35286	Dhx15	DHX15_MOUSE	TB_24H-MOCK_24H	-0.308133	0.079993	0.264209	no	-0.308133	0.264209	Pre-mRNA-splicing factor ATP-dependent RNA helicase DHX15 (EC 3.6.4.13) (DEAH box protein 15)
Q6PGC1	Dhx29	DHX29_MOUSE	TB_24H-MOCK_24H	-0.386819	0.234453	0.512171	no	-0.386819	0.512171	ATP-dependent RNA helicase DHX29 (EC 3.6.4.13) (DEAH box protein 29)
Q99PU8	Dhx30	DHX30_MOUSE	TB_24H-MOCK_24H	-0.736184	0.0135234	0.0757584	no	-0.736184	0.0757584	Putative ATP-dependent RNA helicase DHX30 (EC 3.6.4.13) (DEAH box protein 30)
Q99J87	Dhx58	DHX58_MOUSE	TB_24H-MOCK_24H	0.845977	1.09412e-05	0.000228937	no	0.845977	0.000228937	Probable ATP-dependent RNA helicase DHX58 (EC 3.6.4.13) (Probable ATP-dependent helicase LGP2) (Protein D11Lgp2) (RIG-I-like receptor 3) (RLR-3) (RIG-I-like receptor Lgp2) (RLR)
O70133	Dhx9	DHX9_MOUSE	TB_24H-MOCK_24H	-0.341681	0.0063952	0.0435076	no	-0.341681	0.0435076	ATP-dependent RNA helicase A (RHA) (EC 3.6.4.13) (DEAH box protein 9) (mHEL-5) (Nuclear DNA helicase II) (NDH II)
Q9JIQ3	Diablo	DBLOH_MOUSE	TB_24H-MOCK_24H	-0.661014	0.0783387	0.261227	no	-0.661014	0.261227	Diablo homolog, mitochondrial (Direct IAP-binding protein with low pI) (Second mitochondria-derived activator of caspase) (Smac)
O08808	Diaph1	DIAP1_MOUSE	TB_24H-MOCK_24H	0.249839	0.0688422	0.239432	no	0.249839	0.239432	Protein diaphanous homolog 1 (Diaphanous-related formin-1) (DRF1) (p140mDIA) (mDIA1)
O70566	Diaph2	DIAP2_MOUSE	TB_24H-MOCK_24H	0.381559	0.0259479	0.123093	no	0.381559	0.123093	Protein diaphanous homolog 2 (Diaphanous-related formin-2) (DRF2) (mDia3)
Q8R418	Dicer1	DICER_MOUSE	TB_24H-MOCK_24H	-0.247738	0.348265	0.636512	no	-0.247738	0.636512	Endoribonuclease Dicer (EC 3.1.26.3) (Double-strand-specific ribonuclease mDCR-1)
Q8C9B9	Dido1	DIDO1_MOUSE	TB_24H-MOCK_24H	-0.13198	0.643751	0.838601	no	-0.13198	0.838601	Death-inducer obliterator 1 (DIO-1) (Death-associated transcription factor 1) (DATF-1)
Q3UH60	Dip2b	DIP2B_MOUSE	TB_24H-MOCK_24H	-0.458831	0.0282951	0.130602	no	-0.458831	0.130602	Disco-interacting protein 2 homolog B (DIP2 homolog B)
Q9CSH3	Dis3	RRP44_MOUSE	TB_24H-MOCK_24H	-0.682591	0.00902349	0.0563908	no	-0.682591	0.0563908	Exosome complex exonuclease RRP44 (EC 3.1.13.-) (EC 3.1.26.-) (Protein DIS3 homolog) (Ribosomal RNA-processing protein 44)
Q8CI75	Dis3l2	DI3L2_MOUSE	TB_24H-MOCK_24H	-0.71699	0.16255	0.417539	no	-0.71699	0.417539	DIS3-like exonuclease 2 (EC 3.1.13.-)
Q9ESX5	Dkc1	DKC1_MOUSE	TB_24H-MOCK_24H	-0.43198	0.26589	0.550625	no	-0.43198	0.550625	H/ACA ribonucleoprotein complex subunit 4 (EC 5.4.99.-) (Dyskerin) (Nopp140-associated protein of 57 kDa) (Nucleolar protein NAP57) (Nucleolar protein family A member 4) (snoRNP protein DKC1)
Q8BMF4	Dlat	ODP2_MOUSE	TB_24H-MOCK_24H	0.0734254	0.340924	0.628083	no	0.0734254	0.628083	Dihydrolipoyllysine-residue acetyltransferase component of pyruvate dehydrogenase complex, mitochondrial (EC 2.3.1.12) (Dihydrolipoamide acetyltransferase component of pyruvate dehydrogenase complex) (Pyruvate dehydrogenase complex component E2) (PDC-E2) (PDCE2)
O08749	Dld	DLDH_MOUSE	TB_24H-MOCK_24H	0.230971	0.106711	0.322717	no	0.230971	0.322717	Dihydrolipoyl dehydrogenase, mitochondrial (EC 1.8.1.4) (Dihydrolipoamide dehydrogenase)
Q811D0	Dlg1	DLG1_MOUSE	TB_24H-MOCK_24H	-0.52106	0.147933	0.39657	no	-0.52106	0.39657	Disks large homolog 1 (Embryo-dlg/synapse-associated protein 97) (E-dlg/SAP97) (Synapse-associated protein 97) (SAP-97) (SAP97)
B1AZP2	Dlgap4	DLGP4_MOUSE	TB_24H-MOCK_24H	0.118247	0.771704	0.904352	no	0.118247	0.904352	Disks large-associated protein 4 (DAP-4) (PSD-95/SAP90-binding protein 4) (SAP90/PSD-95-associated protein 4) (SAPAP-4)
Q9D2G2	Dlst	ODO2_MOUSE	TB_24H-MOCK_24H	0.161775	0.39623	0.67658	no	0.161775	0.67658	Dihydrolipoyllysine-residue succinyltransferase component of 2-oxoglutarate dehydrogenase complex, mitochondrial (EC 2.3.1.61) (2-oxoglutarate dehydrogenase complex component E2) (OGDC-E2) (Dihydrolipoamide succinyltransferase component of 2-oxoglutarate dehydrogenase complex) (E2K)
P11531	Dmd	DMD_MOUSE	TB_24H-MOCK_24H	0.406551	0.181701	0.446297	no	0.406551	0.446297	Dystrophin
Q6PNC0	Dmxl1	DMXL1_MOUSE	TB_24H-MOCK_24H	0.0502336	0.885186	0.950237	no	0.0502336	0.950237	DmX-like protein 1 (X-like 1 protein)
P63037	Dnaja1	DNJA1_MOUSE	TB_24H-MOCK_24H	0.322373	0.035447	0.150621	no	0.322373	0.150621	DnaJ homolog subfamily A member 1 (DnaJ protein homolog 2) (Heat shock 40 kDa protein 4) (Heat shock protein J2) (HSJ-2)
Q9QYJ0	Dnaja2	DNJA2_MOUSE	TB_24H-MOCK_24H	0.270786	0.0510876	0.194455	no	0.270786	0.194455	DnaJ homolog subfamily A member 2 (mDj3)
Q99M87	Dnaja3	DNJA3_MOUSE	TB_24H-MOCK_24H	-0.648676	0.00391717	0.0296739	no	-0.648676	0.0296739	DnaJ homolog subfamily A member 3, mitochondrial (DnaJ protein Tid-1) (mTid-1) (Tumorous imaginal discs protein Tid56 homolog)
Q9QYJ3	Dnajb1	DNJB1_MOUSE	TB_24H-MOCK_24H	-0.0301055	0.918119	0.966218	no	-0.0301055	0.966218	DnaJ homolog subfamily B member 1 (Heat shock 40 kDa protein 1) (HSP40) (Heat shock protein 40)
Q99KV1	Dnajb11	DJB11_MOUSE	TB_24H-MOCK_24H	-0.0017348	0.99375	0.997357	no	-0.0017348	0.997357	DnaJ homolog subfamily B member 11 (APOBEC1-binding protein 2) (ABBP-2) (ER-associated DNAJ) (ER-associated Hsp40 co-chaperone) (Endoplasmic reticulum DNA J domain-containing protein 3) (ER-resident protein ERdj3) (ERdj3) (ERj3p)
Q9QYI4	Dnajb12	DJB12_MOUSE	TB_24H-MOCK_24H	0.218868	0.671418	0.851313	no	0.218868	0.851313	DnaJ homolog subfamily B member 12 (mDj10)
Q9D832	Dnajb4	DNJB4_MOUSE	TB_24H-MOCK_24H	-1.28017	0.00183279	0.0165764	no	-1.28017	0.0165764	DnaJ homolog subfamily B member 4
Q61712	Dnajc1	DNJC1_MOUSE	TB_24H-MOCK_24H	0.0124133	0.965077	0.987436	no	0.0124133	0.987436	DnaJ homolog subfamily C member 1 (DnaJ protein homolog MTJ1)
Q9DC23	Dnajc10	DJC10_MOUSE	TB_24H-MOCK_24H	0.165265	0.462887	0.737078	no	0.165265	0.737078	DnaJ homolog subfamily C member 10 (EC 1.8.4.-) (Endoplasmic reticulum DNA J domain-containing protein 5) (ER-resident protein ERdj5) (ERdj5) (Endoplasmic reticulum DnaJ-PDI fusion protein 1) (J domain-containing protein disulfide isomerase-like protein) (J domain-containing PDI-like protein) (JPDI)
Q5U458	Dnajc11	DJC11_MOUSE	TB_24H-MOCK_24H	-0.135478	0.59779	0.814901	no	-0.135478	0.814901	DnaJ homolog subfamily C member 11
Q9CQV7	Dnajc19	TIM14_MOUSE	TB_24H-MOCK_24H	-0.592841	0.0418231	0.168995	no	-0.592841	0.168995	Mitochondrial import inner membrane translocase subunit TIM14 (DnaJ homolog subfamily C member 19)
P54103	Dnajc2	DNJC2_MOUSE	TB_24H-MOCK_24H	-0.487341	0.065672	0.231945	no	-0.487341	0.231945	DnaJ homolog subfamily C member 2 (Mouse Id associate 1) (MIDA1) (Zuotin-related factor 1) [Cleaved into: DnaJ homolog subfamily C member 2, N-terminally processed]
Q91YW3	Dnajc3	DNJC3_MOUSE	TB_24H-MOCK_24H	-0.0722497	0.875375	0.946001	no	-0.0722497	0.946001	DnaJ homolog subfamily C member 3 (Interferon-induced, double-stranded RNA-activated protein kinase inhibitor) (Protein kinase inhibitor of 58 kDa) (Protein kinase inhibitor p58)
Q9QYI3	Dnajc7	DNJC7_MOUSE	TB_24H-MOCK_24H	0.0541897	0.87445	0.945978	no	0.0541897	0.945978	DnaJ homolog subfamily C member 7 (Cytoplasmic CAR retention protein) (CCRP) (MDj11) (Tetratricopeptide repeat protein 2) (TPR repeat protein 2)
Q6NZB0	Dnajc8	DNJC8_MOUSE	TB_24H-MOCK_24H	-1.08782	0.0212874	0.106602	no	-1.08782	0.106602	DnaJ homolog subfamily C member 8
Q91WN1	Dnajc9	DNJC9_MOUSE	TB_24H-MOCK_24H	-1.53256	6.61413e-06	0.000149727	no	-1.53256	0.000149727	DnaJ homolog subfamily C member 9
Q8K1M6	Dnm1l	DNM1L_MOUSE	TB_24H-MOCK_24H	-0.0983398	0.502793	0.766097	no	-0.0983398	0.766097	Dynamin-1-like protein (EC 3.6.5.5) (Dynamin family member proline-rich carboxyl-terminal domain less) (Dymple) (Dynamin-related protein 1)
P39054	Dnm2	DYN2_MOUSE	TB_24H-MOCK_24H	0.0396938	0.800805	0.916342	no	0.0396938	0.916342	Dynamin-2 (EC 3.6.5.5) (Dynamin UDNM)
Q8BZ98	Dnm3	DYN3_MOUSE	TB_24H-MOCK_24H	-0.0250908	0.910149	0.961108	no	-0.0250908	0.961108	Dynamin-3 (EC 3.6.5.5)
P13864	Dnmt1	DNMT1_MOUSE	TB_24H-MOCK_24H	-1.92128	2.95143e-08	1.2983e-06	no	-1.92128	1.2983e-06	DNA (cytosine-5)-methyltransferase 1 (Dnmt1) (Met-1) (EC 2.1.1.37) (DNA methyltransferase MmuI) (DNA MTase MmuI) (M.MmuI) (MCMT)
O88508	Dnmt3a	DNM3A_MOUSE	TB_24H-MOCK_24H	-0.454652	0.0752474	0.25484	no	-0.454652	0.25484	DNA (cytosine-5)-methyltransferase 3A (Dnmt3a) (EC 2.1.1.37) (DNA methyltransferase MmuIIIA) (DNA MTase MmuIIIA) (M.MmuIIIA)
Q9Z2W0	Dnpep	DNPEP_MOUSE	TB_24H-MOCK_24H	0.00904433	0.950605	0.979474	no	0.00904433	0.979474	Aspartyl aminopeptidase (EC 3.4.11.21)
Q80VJ3	Dnph1	DNPH1_MOUSE	TB_24H-MOCK_24H	-0.343553	0.327944	0.615055	no	-0.343553	0.615055	2'-deoxynucleoside 5'-phosphate N-hydrolase 1 (EC 3.2.2.-) (c-Myc-responsive protein Rcl)
Q8R2M2	Dnttip2	TDIF2_MOUSE	TB_24H-MOCK_24H	-0.666145	0.0496827	0.190985	no	-0.666145	0.190985	Deoxynucleotidyltransferase terminal-interacting protein 2
Q8BZN6	Dock10	DOC10_MOUSE	TB_24H-MOCK_24H	0.0773938	0.703503	0.871198	no	0.0773938	0.871198	Dedicator of cytokinesis protein 10 (Zizimin-3)
A2AF47	Dock11	DOC11_MOUSE	TB_24H-MOCK_24H	-0.160234	0.438054	0.716395	no	-0.160234	0.716395	Dedicator of cytokinesis protein 11 (Activated Cdc42-associated guanine nucleotide exchange factor) (ACG) (Zizimin-2)
Q8C3J5	Dock2	DOCK2_MOUSE	TB_24H-MOCK_24H	-0.410065	0.0251292	0.120241	no	-0.410065	0.120241	Dedicator of cytokinesis protein 2 (Protein Hch)
Q8R1A4	Dock7	DOCK7_MOUSE	TB_24H-MOCK_24H	-0.148729	0.284445	0.568063	no	-0.148729	0.568063	Dedicator of cytokinesis protein 7 (Protein moonlight)
Q8C147	Dock8	DOCK8_MOUSE	TB_24H-MOCK_24H	-0.295887	0.0213494	0.106775	no	-0.295887	0.106775	Dedicator of cytokinesis protein 8
P97465	Dok1	DOK1_MOUSE	TB_24H-MOCK_24H	-0.0949846	0.556244	0.791939	no	-0.0949846	0.791939	Docking protein 1 (Downstream of tyrosine kinase 1) (p62(dok))
O70469	Dok2	DOK2_MOUSE	TB_24H-MOCK_24H	-0.585966	0.0262829	0.124074	no	-0.585966	0.124074	Docking protein 2 (Dok-related protein) (Dok-R) (Downstream of tyrosine kinase 2) (IL-four receptor-interacting protein) (FRIP) (p56(dok-2))
Q9QZK7	Dok3	DOK3_MOUSE	TB_24H-MOCK_24H	0.38267	0.145624	0.393379	no	0.38267	0.393379	Docking protein 3 (Downstream of tyrosine kinase 3) (p62(dok)-like protein) (DOK-L)
Q61103	Dpf2	REQU_MOUSE	TB_24H-MOCK_24H	-0.426483	0.156847	0.409686	no	-0.426483	0.409686	Zinc finger protein ubi-d4 (Apoptosis response zinc finger protein) (BRG1-associated factor 45D) (BAF45D) (D4, zinc and double PHD fingers family 2) (Protein requiem)
Q5NCQ5	Dph1	DPH1_MOUSE	TB_24H-MOCK_24H	-1.60855	9.21375e-05	0.00142773	no	-1.60855	0.00142773	Diphthamide biosynthesis protein 1 (DPH1 homolog) (MmDph1) (Diphthamide biosynthesis protein 2 homolog-like 1) (DPH2-like 1) (Ovarian cancer-associated gene 1 protein homolog)
Q9CR25	Dph2	DPH2_MOUSE	TB_24H-MOCK_24H	-0.168604	0.646411	0.840035	no	-0.168604	0.840035	Diphthamide biosynthesis protein 2 (DPH2 homolog) (Diphthamide biosynthesis protein 2 homolog-like 2) (DPH2-like 2) (MmDph2)
O70152	Dpm1	DPM1_MOUSE	TB_24H-MOCK_24H	-0.127185	0.377734	0.663433	no	-0.127185	0.663433	Dolichol-phosphate mannosyltransferase subunit 1 (EC 2.4.1.83) (Dolichol-phosphate mannose synthase subunit 1) (DPM synthase subunit 1) (Dolichyl-phosphate beta-D-mannosyltransferase subunit 1) (Mannose-P-dolichol synthase subunit 1) (MPD synthase)
Q9D1Q4	Dpm3	DPM3_MOUSE	TB_24H-MOCK_24H	-0.222023	0.443793	0.722423	no	-0.222023	0.722423	Dolichol-phosphate mannosyltransferase subunit 3 (Dolichol-phosphate mannose synthase subunit 3) (DPM synthase subunit 3) (Dolichyl-phosphate beta-D-mannosyltransferase subunit 3) (Mannose-P-dolichol synthase subunit 3) (MPD synthase subunit 3)
Q99KK7	Dpp3	DPP3_MOUSE	TB_24H-MOCK_24H	-0.251251	0.143889	0.390648	no	-0.251251	0.390648	Dipeptidyl peptidase 3 (EC 3.4.14.4) (Dipeptidyl aminopeptidase III) (Dipeptidyl arylamidase III) (Dipeptidyl peptidase III) (DPP III) (Enkephalinase B)
Q9ET22	Dpp7	DPP2_MOUSE	TB_24H-MOCK_24H	0.478377	0.0410418	0.166708	no	0.478377	0.166708	Dipeptidyl peptidase 2 (EC 3.4.14.2) (Dipeptidyl aminopeptidase II) (Dipeptidyl peptidase 7) (Dipeptidyl peptidase II) (DPP II) (Quiescent cell proline dipeptidase)
Q80YA7	Dpp8	DPP8_MOUSE	TB_24H-MOCK_24H	-0.400983	0.354005	0.642755	no	-0.400983	0.642755	Dipeptidyl peptidase 8 (DP8) (EC 3.4.14.5) (Dipeptidyl peptidase VIII) (DPP VIII)
Q8BVG4	Dpp9	DPP9_MOUSE	TB_24H-MOCK_24H	-0.101619	0.750108	0.891166	no	-0.101619	0.891166	Dipeptidyl peptidase 9 (DP9) (EC 3.4.14.5) (Dipeptidyl peptidase IX) (DPP IX) (Dipeptidyl peptidase-like protein 9) (DPLP9)
Q99LT0	Dpy30	DPY30_MOUSE	TB_24H-MOCK_24H	-0.083168	0.643632	0.838601	no	-0.083168	0.838601	Protein dpy-30 homolog (Dpy-30-like protein) (Dpy-30L)
O08553	Dpysl2	DPYL2_MOUSE	TB_24H-MOCK_24H	0.169651	0.590999	0.810399	no	0.169651	0.810399	Dihydropyrimidinase-related protein 2 (DRP-2) (Unc-33-like phosphoprotein 2) (ULIP-2)
Q91WV0	Dr1	NC2B_MOUSE	TB_24H-MOCK_24H	-0.0714088	0.788363	0.910971	no	-0.0714088	0.910971	Protein Dr1 (Down-regulator of transcription 1) (Negative cofactor 2-beta) (NC2-beta) (TATA-binding protein-associated phosphoprotein)
Q9D6N5	Drap1	NC2A_MOUSE	TB_24H-MOCK_24H	-0.0847616	0.864285	0.945548	no	-0.0847616	0.945548	Dr1-associated corepressor (Dr1-associated protein 1) (Negative cofactor 2-alpha) (NC2-alpha)
P32233	Drg1	DRG1_MOUSE	TB_24H-MOCK_24H	-1.02518	0.00945968	0.0584959	no	-1.02518	0.0584959	Developmentally-regulated GTP-binding protein 1 (DRG-1) (Neural precursor cell expressed developmentally down-regulated protein 3) (NEDD-3)
Q9QXB9	Drg2	DRG2_MOUSE	TB_24H-MOCK_24H	-0.188581	0.513681	0.771917	no	-0.188581	0.771917	Developmentally-regulated GTP-binding protein 2 (DRG-2)
O35075	Dscr3	DSCR3_MOUSE	TB_24H-MOCK_24H	-0.113133	0.524414	0.77482	no	-0.113133	0.77482	Down syndrome critical region protein 3 homolog (Down syndrome critical region protein A homolog)
Q9R0P5	Dstn	DEST_MOUSE	TB_24H-MOCK_24H	-0.0753794	0.650824	0.841744	no	-0.0753794	0.841744	Destrin (Actin-depolymerizing factor) (ADF) (Sid 23)
Q91WZ8	Dtnbp1	DTBP1_MOUSE	TB_24H-MOCK_24H	-0.0642423	0.810138	0.921296	no	-0.0642423	0.921296	Dysbindin (Biogenesis of lysosome-related organelles complex 1 subunit 8) (BLOC-1 subunit 8) (Dysbindin-1) (Dystrobrevin-binding protein 1) (Hermansky-Pudlak syndrome 7 protein homolog) (HPS7 protein homolog)
Q3UIR3	Dtx3l	DTX3L_MOUSE	TB_24H-MOCK_24H	1.51801	4.01988e-09	2.26589e-07	no	1.51801	2.26589e-07	E3 ubiquitin-protein ligase DTX3L (EC 6.3.2.-) (Protein deltex-3-like)
Q91XI1	Dus3l	DUS3L_MOUSE	TB_24H-MOCK_24H	-0.179225	0.472032	0.743686	no	-0.179225	0.743686	tRNA-dihydrouridine(47) synthase [NAD(P)(+)]-like (EC 1.3.1.-) (tRNA-dihydrouridine synthase 3-like)
Q9D0T2	Dusp12	DUS12_MOUSE	TB_24H-MOCK_24H	-0.247605	0.487094	0.756942	no	-0.247605	0.756942	Dual specificity protein phosphatase 12 (EC 3.1.3.16) (EC 3.1.3.48) (Dual specificity phosphatase T-DSP4) (Dual specificity phosphatase VH1)
Q9D7X3	Dusp3	DUS3_MOUSE	TB_24H-MOCK_24H	-0.077656	0.604365	0.818006	no	-0.077656	0.818006	Dual specificity protein phosphatase 3 (EC 3.1.3.16) (EC 3.1.3.48) (T-DSP11) (Vaccinia H1-related phosphatase) (VHR)
Q60838	Dvl2	DVL2_MOUSE	TB_24H-MOCK_24H	-1.402	3.14212e-08	1.36141e-06	no	-1.402	1.36141e-06	Segment polarity protein dishevelled homolog DVL-2 (Dishevelled-2) (DSH homolog 2)
Q9JHU4	Dync1h1	DYHC1_MOUSE	TB_24H-MOCK_24H	0.0175336	0.866653	0.945551	no	0.0175336	0.945551	Cytoplasmic dynein 1 heavy chain 1 (Cytoplasmic dynein heavy chain 1) (Dynein heavy chain, cytosolic)
O88485	Dync1i1	DC1I1_MOUSE	TB_24H-MOCK_24H	-0.019627	0.943345	0.977694	no	-0.019627	0.977694	Cytoplasmic dynein 1 intermediate chain 1 (Cytoplasmic dynein intermediate chain 1) (Dynein intermediate chain 1, cytosolic) (DH IC-1)
O88487	Dync1i2	DC1I2_MOUSE	TB_24H-MOCK_24H	0.281959	0.236378	0.515605	no	0.281959	0.515605	Cytoplasmic dynein 1 intermediate chain 2 (Cytoplasmic dynein intermediate chain 2) (Dynein intermediate chain 2, cytosolic) (DH IC-2)
Q8R1Q8	Dync1li1	DC1L1_MOUSE	TB_24H-MOCK_24H	0.0123985	0.901746	0.958183	no	0.0123985	0.958183	Cytoplasmic dynein 1 light intermediate chain 1 (Dynein light chain A) (DLC-A) (Dynein light intermediate chain 1, cytosolic)
Q6PDL0	Dync1li2	DC1L2_MOUSE	TB_24H-MOCK_24H	-0.0908331	0.664467	0.849176	no	-0.0908331	0.849176	Cytoplasmic dynein 1 light intermediate chain 2 (Dynein light intermediate chain 2, cytosolic)
P63168	Dynll1	DYL1_MOUSE	TB_24H-MOCK_24H	0.300927	0.646222	0.840035	no	0.300927	0.840035	Dynein light chain 1, cytoplasmic (8 kDa dynein light chain) (DLC8) (Dynein light chain LC8-type 1) (Protein inhibitor of neuronal nitric oxide synthase) (PIN) (mPIN)
P51807	Dynlt1	DYLT1_MOUSE	TB_24H-MOCK_24H	0.217127	0.61045	0.822363	no	0.217127	0.822363	Dynein light chain Tctex-type 1 (Activator of G-protein signaling 2) (AGS2) (T-complex testis-specific protein 1) (TCTEX-1)
Q61214	Dyrk1a	DYR1A_MOUSE	TB_24H-MOCK_24H	-0.519409	0.184303	0.451108	no	-0.519409	0.451108	Dual specificity tyrosine-phosphorylation-regulated kinase 1A (EC 2.7.12.1) (Dual specificity YAK1-related kinase) (MP86) (Protein kinase minibrain homolog) (MNBH)
Q9D903	Ebna1bp2	EBP2_MOUSE	TB_24H-MOCK_24H	-0.435145	0.0802743	0.264841	no	-0.435145	0.264841	Probable rRNA-processing protein EBP2
P70245	Ebp	EBP_MOUSE	TB_24H-MOCK_24H	-0.127667	0.358015	0.647002	no	-0.127667	0.647002	3-beta-hydroxysteroid-Delta(8),Delta(7)-isomerase (EC 5.3.3.5) (Cholestenol Delta-isomerase) (Delta(8)-Delta(7) sterol isomerase) (D8-D7 sterol isomerase) (Emopamil-binding protein)
O35459	Ech1	ECH1_MOUSE	TB_24H-MOCK_24H	0.309718	0.211706	0.482126	no	0.309718	0.482126	Delta(3,5)-Delta(2,4)-dienoyl-CoA isomerase, mitochondrial (EC 5.3.3.-)
Q8BH95	Echs1	ECHM_MOUSE	TB_24H-MOCK_24H	0.412367	0.196367	0.464941	no	0.412367	0.464941	Enoyl-CoA hydratase, mitochondrial (EC 4.2.1.17) (Enoyl-CoA hydratase 1) (Short-chain enoyl-CoA hydratase) (SCEH)
P42125	Eci1	ECI1_MOUSE	TB_24H-MOCK_24H	-0.0208485	0.881582	0.949082	no	-0.0208485	0.949082	Enoyl-CoA delta isomerase 1, mitochondrial (EC 5.3.3.8) (3,2-trans-enoyl-CoA isomerase) (Delta(3),Delta(2)-enoyl-CoA isomerase) (D3,D2-enoyl-CoA isomerase) (Dodecenoyl-CoA isomerase)
Q9WUR2	Eci2	ECI2_MOUSE	TB_24H-MOCK_24H	-0.0901927	0.810744	0.92143	no	-0.0901927	0.92143	Enoyl-CoA delta isomerase 2, mitochondrial (EC 5.3.3.8) (Delta(3),delta(2)-enoyl-CoA isomerase) (D3,D2-enoyl-CoA isomerase) (Dodecenoyl-CoA isomerase) (Peroxisomal 3,2-trans-enoyl-CoA isomerase) (pECI)
Q6PDI5	Ecm29	ECM29_MOUSE	TB_24H-MOCK_24H	-0.0727328	0.587073	0.809317	no	-0.0727328	0.809317	Proteasome-associated protein ECM29 homolog (Ecm29)
Q8K2D3	Edc3	EDC3_MOUSE	TB_24H-MOCK_24H	-0.0735103	0.756557	0.896103	no	-0.0735103	0.896103	Enhancer of mRNA-decapping protein 3 (YjeF domain-containing protein 1)
Q3UJB9	Edc4	EDC4_MOUSE	TB_24H-MOCK_24H	0.124152	0.483006	0.752356	no	0.124152	0.752356	Enhancer of mRNA-decapping protein 4
Q8BL66	Eea1	EEA1_MOUSE	TB_24H-MOCK_24H	-0.00944963	0.988415	0.995617	no	-0.00944963	0.995617	Early endosome antigen 1
P10126	Eef1a1	EF1A1_MOUSE	TB_24H-MOCK_24H	0.0810062	0.81701	0.923939	no	0.0810062	0.923939	Elongation factor 1-alpha 1 (EF-1-alpha-1) (Elongation factor Tu) (EF-Tu) (Eukaryotic elongation factor 1 A-1) (eEF1A-1)
O70251	Eef1b	EF1B_MOUSE	TB_24H-MOCK_24H	-0.346657	0.149362	0.399296	no	-0.346657	0.399296	Elongation factor 1-beta (EF-1-beta)
P57776	Eef1d	EF1D_MOUSE	TB_24H-MOCK_24H	-0.195267	0.203576	0.472512	no	-0.195267	0.472512	Elongation factor 1-delta (EF-1-delta)
Q9D1M4	Eef1e1	MCA3_MOUSE	TB_24H-MOCK_24H	-0.497747	0.167744	0.423887	no	-0.497747	0.423887	Eukaryotic translation elongation factor 1 epsilon-1 (Elongation factor p18) (Multisynthase complex auxiliary component p18)
Q9D8N0	Eef1g	EF1G_MOUSE	TB_24H-MOCK_24H	-0.353674	0.00271066	0.0225171	no	-0.353674	0.0225171	Elongation factor 1-gamma (EF-1-gamma) (eEF-1B gamma)
P58252	Eef2	EF2_MOUSE	TB_24H-MOCK_24H	-0.103082	0.429622	0.70799	no	-0.103082	0.70799	Elongation factor 2 (EF-2)
Q9JHW4	Eefsec	SELB_MOUSE	TB_24H-MOCK_24H	-1.06383	0.014196	0.078504	no	-1.06383	0.078504	Selenocysteine-specific elongation factor (Elongation factor sec) (Eukaryotic elongation factor, selenocysteine-tRNA-specific) (mSelB)
Q9D8Y0	Efhd2	EFHD2_MOUSE	TB_24H-MOCK_24H	0.144447	0.893127	0.953736	no	0.144447	0.953736	EF-hand domain-containing protein D2 (Swiprosin-1)
Q8C0D5	Efl1	EFL1_MOUSE	TB_24H-MOCK_24H	-0.0318305	0.887754	0.951495	no	-0.0318305	0.951495	Elongation factor-like GTPase 1 (Elongation factor Tu GTP-binding domain-containing protein 1) (Elongation factor-like 1) (Protein FAM42A)
Q8BG67	Efr3a	EFR3A_MOUSE	TB_24H-MOCK_24H	0.391996	0.198133	0.467136	no	0.391996	0.467136	Protein EFR3 homolog A (Protein EFR3-like)
O08810	Eftud2	U5S1_MOUSE	TB_24H-MOCK_24H	-0.131042	0.589153	0.809836	no	-0.131042	0.809836	116 kDa U5 small nuclear ribonucleoprotein component (Elongation factor Tu GTP-binding domain-containing protein 2) (U5 snRNP-specific protein, 116 kDa) (U5-116 kDa)
Q99MS7	Ehbp1l1	EH1L1_MOUSE	TB_24H-MOCK_24H	-0.175185	0.358228	0.647084	no	-0.175185	0.647084	EH domain-binding protein 1-like protein 1 (Tangerin)
Q9WVK4	Ehd1	EHD1_MOUSE	TB_24H-MOCK_24H	0.784388	3.40681e-07	1.0899e-05	no	0.784388	1.0899e-05	EH domain-containing protein 1 (PAST homolog 1) (mPAST1)
Q9EQP2	Ehd4	EHD4_MOUSE	TB_24H-MOCK_24H	-0.000334946	0.997159	0.999005	no	-0.000334946	0.999005	EH domain-containing protein 4 (PAST homolog 2) (mPAST2)
P48024	Eif1	EIF1_MOUSE	TB_24H-MOCK_24H	-0.0772124	0.87234	0.945978	no	-0.0772124	0.945978	Eukaryotic translation initiation factor 1 (eIF1) (Protein translation factor SUI1 homolog)
Q8BJW6	Eif2a	EIF2A_MOUSE	TB_24H-MOCK_24H	-0.127194	0.565458	0.797119	no	-0.127194	0.797119	Eukaryotic translation initiation factor 2A (eIF-2A) [Cleaved into: Eukaryotic translation initiation factor 2A, N-terminally processed]
Q03963	Eif2ak2	E2AK2_MOUSE	TB_24H-MOCK_24H	1.37636	4.77396e-13	6.16e-11	no	1.37636	6.16e-11	Interferon-induced, double-stranded RNA-activated protein kinase (EC 2.7.11.1) (Eukaryotic translation initiation factor 2-alpha kinase 2) (eIF-2A protein kinase 2) (Interferon-inducible RNA-dependent protein kinase) (P1/eIF-2A protein kinase) (Protein kinase RNA-activated) (PKR) (Protein kinase R) (Serine/threonine-protein kinase TIK) (Tyrosine-protein kinase EIF2AK2) (EC 2.7.10.2) (p68 kinase)
Q99LC8	Eif2b1	EI2BA_MOUSE	TB_24H-MOCK_24H	-0.369834	0.0721881	0.247117	no	-0.369834	0.247117	Translation initiation factor eIF-2B subunit alpha (eIF-2B GDP-GTP exchange factor subunit alpha)
Q99LD9	Eif2b2	EI2BB_MOUSE	TB_24H-MOCK_24H	0.0466013	0.886924	0.951312	no	0.0466013	0.951312	Translation initiation factor eIF-2B subunit beta (eIF-2B GDP-GTP exchange factor subunit beta)
Q61749	Eif2b4	EI2BD_MOUSE	TB_24H-MOCK_24H	-0.173419	0.311707	0.598818	no	-0.173419	0.598818	Translation initiation factor eIF-2B subunit delta (eIF-2B GDP-GTP exchange factor subunit delta)
Q8CHW4	Eif2b5	EI2BE_MOUSE	TB_24H-MOCK_24H	-0.240716	0.342441	0.630033	no	-0.240716	0.630033	Translation initiation factor eIF-2B subunit epsilon (eIF-2B GDP-GTP exchange factor subunit epsilon)
Q61211	Eif2d	EIF2D_MOUSE	TB_24H-MOCK_24H	-0.134305	0.560574	0.794575	no	-0.134305	0.794575	Eukaryotic translation initiation factor 2D (eIF2D) (Ligatin)
Q6ZWX6	Eif2s1	IF2A_MOUSE	TB_24H-MOCK_24H	-0.0557264	0.73926	0.886792	no	-0.0557264	0.886792	Eukaryotic translation initiation factor 2 subunit 1 (Eukaryotic translation initiation factor 2 subunit alpha) (eIF-2-alpha) (eIF-2A) (eIF-2alpha)
Q99L45	Eif2s2	IF2B_MOUSE	TB_24H-MOCK_24H	-0.071753	0.678711	0.854959	no	-0.071753	0.854959	Eukaryotic translation initiation factor 2 subunit 2 (Eukaryotic translation initiation factor 2 subunit beta) (eIF-2-beta)
Q9Z0N1	Eif2s3x	IF2G_MOUSE	TB_24H-MOCK_24H	-0.0681752	0.598478	0.814901	no	-0.0681752	0.814901	Eukaryotic translation initiation factor 2 subunit 3, X-linked (Eukaryotic translation initiation factor 2 subunit gamma, X-linked) (eIF-2-gamma X)
Q9Z0N2	Eif2s3y	IF2H_MOUSE	TB_24H-MOCK_24H	-0.108701	0.631722	0.834363	no	-0.108701	0.834363	Eukaryotic translation initiation factor 2 subunit 3, Y-linked (Eukaryotic translation initiation factor 2 subunit gamma, Y-linked) (eIF-2-gamma Y) (Spermatogonial proliferation factor) (Spy)
P23116	Eif3a	EIF3A_MOUSE	TB_24H-MOCK_24H	-0.301025	0.0154583	0.0839256	no	-0.301025	0.0839256	Eukaryotic translation initiation factor 3 subunit A (eIF3a) (Centrosomin) (Eukaryotic translation initiation factor 3 subunit 10) (eIF-3-theta) (eIF3 p167) (eIF3 p180) (eIF3 p185) (p162)
Q8JZQ9	Eif3b	EIF3B_MOUSE	TB_24H-MOCK_24H	-0.321873	0.0100651	0.0615515	no	-0.321873	0.0615515	Eukaryotic translation initiation factor 3 subunit B (eIF3b) (Eukaryotic translation initiation factor 3 subunit 9) (eIF-3-eta) (eIF3 p116)
Q8R1B4	Eif3c	EIF3C_MOUSE	TB_24H-MOCK_24H	-0.264046	0.023478	0.114462	no	-0.264046	0.114462	Eukaryotic translation initiation factor 3 subunit C (eIF3c) (Eukaryotic translation initiation factor 3 subunit 8) (eIF3 p110)
O70194	Eif3d	EIF3D_MOUSE	TB_24H-MOCK_24H	-0.129578	0.629391	0.833803	no	-0.129578	0.833803	Eukaryotic translation initiation factor 3 subunit D (eIF3d) (Eukaryotic translation initiation factor 3 subunit 7) (eIF-3-zeta) (eIF3 p66)
P60229	Eif3e	EIF3E_MOUSE	TB_24H-MOCK_24H	-0.415937	0.000388196	0.00459544	no	-0.415937	0.00459544	Eukaryotic translation initiation factor 3 subunit E (eIF3e) (Eukaryotic translation initiation factor 3 subunit 6) (MMTV integration site 6) (Mammary tumor-associated protein INT-6) (Viral integration site protein INT-6) (eIF-3 p48)
Q9DCH4	Eif3f	EIF3F_MOUSE	TB_24H-MOCK_24H	-0.0753931	0.637825	0.83692	no	-0.0753931	0.83692	Eukaryotic translation initiation factor 3 subunit F (eIF3f) (Deubiquitinating enzyme eIF3f) (EC 3.4.19.12) (Eukaryotic translation initiation factor 3 subunit 5) (eIF-3-epsilon) (eIF3 p47)
Q9Z1D1	Eif3g	EIF3G_MOUSE	TB_24H-MOCK_24H	-0.747091	0.0636113	0.226299	no	-0.747091	0.226299	Eukaryotic translation initiation factor 3 subunit G (eIF3g) (Eukaryotic translation initiation factor 3 RNA-binding subunit) (eIF-3 RNA-binding subunit) (Eukaryotic translation initiation factor 3 subunit 4) (eIF-3-delta) (eIF3 p42) (eIF3 p44)
Q91WK2	Eif3h	EIF3H_MOUSE	TB_24H-MOCK_24H	-0.297284	0.214329	0.484619	no	-0.297284	0.484619	Eukaryotic translation initiation factor 3 subunit H (eIF3h) (Eukaryotic translation initiation factor 3 subunit 3) (eIF-3-gamma) (eIF3 p40 subunit)
Q9QZD9	Eif3i	EIF3I_MOUSE	TB_24H-MOCK_24H	-0.210185	0.0783479	0.261227	no	-0.210185	0.261227	Eukaryotic translation initiation factor 3 subunit I (eIF3i) (Eukaryotic translation initiation factor 3 subunit 2) (TGF-beta receptor-interacting protein 1) (TRIP-1) (eIF-3-beta) (eIF3 p36)
Q3UGC7	Eif3j1	EI3JA_MOUSE	TB_24H-MOCK_24H	-0.484145	0.255361	0.538107	no	-0.484145	0.538107	Eukaryotic translation initiation factor 3 subunit J-A (eIF3j-A) (Eukaryotic translation initiation factor 3 subunit 1-A) (eIF-3-alpha-A) (eIF3 p35)
Q9DBZ5	Eif3k	EIF3K_MOUSE	TB_24H-MOCK_24H	-0.459347	0.0112669	0.0670987	no	-0.459347	0.0670987	Eukaryotic translation initiation factor 3 subunit K (eIF3k) (Eukaryotic translation initiation factor 3 subunit 12) (eIF-3 p25)
Q8QZY1	Eif3l	EIF3L_MOUSE	TB_24H-MOCK_24H	-0.140931	0.388923	0.671313	no	-0.140931	0.671313	Eukaryotic translation initiation factor 3 subunit L (eIF3l) (66 kDa tyrosine-rich heat shock protein) (67 kDa polymerase-associated factor) (Eukaryotic translation initiation factor 3 subunit 6-interacting protein) (Eukaryotic translation initiation factor 3 subunit E-interacting protein) (HSP-66Y) (PAF67)
Q99JX4	Eif3m	EIF3M_MOUSE	TB_24H-MOCK_24H	-0.156928	0.338473	0.626005	no	-0.156928	0.626005	Eukaryotic translation initiation factor 3 subunit M (eIF3m) (PCI domain-containing protein 1)
P60843	Eif4a1	IF4A1_MOUSE	TB_24H-MOCK_24H	-0.324157	0.144484	0.391665	no	-0.324157	0.391665	Eukaryotic initiation factor 4A-I (eIF-4A-I) (eIF4A-I) (EC 3.6.4.13) (ATP-dependent RNA helicase eIF4A-1)
P10630	Eif4a2	IF4A2_MOUSE	TB_24H-MOCK_24H	-0.309556	0.270862	0.555302	no	-0.309556	0.555302	Eukaryotic initiation factor 4A-II (eIF-4A-II) (eIF4A-II) (EC 3.6.4.13) (ATP-dependent RNA helicase eIF4A-2)
Q91VC3	Eif4a3	IF4A3_MOUSE	TB_24H-MOCK_24H	-0.165811	0.52975	0.777136	no	-0.165811	0.777136	Eukaryotic initiation factor 4A-III (eIF-4A-III) (eIF4A-III) (EC 3.6.4.13) (ATP-dependent RNA helicase DDX48) (ATP-dependent RNA helicase eIF4A-3) (DEAD box protein 48) (Eukaryotic translation initiation factor 4A isoform 3) [Cleaved into: Eukaryotic initiation factor 4A-III, N-terminally processed]
Q8BGD9	Eif4b	IF4B_MOUSE	TB_24H-MOCK_24H	-0.705482	0.361312	0.649624	no	-0.705482	0.649624	Eukaryotic translation initiation factor 4B (eIF-4B)
P63073	Eif4e	IF4E_MOUSE	TB_24H-MOCK_24H	-0.526673	0.110106	0.329383	no	-0.526673	0.329383	Eukaryotic translation initiation factor 4E (eIF-4E) (eIF4E) (mRNA cap-binding protein) (eIF-4F 25 kDa subunit)
Q60876	Eif4ebp1	4EBP1_MOUSE	TB_24H-MOCK_24H	-0.0139808	0.983479	0.992839	no	-0.0139808	0.992839	Eukaryotic translation initiation factor 4E-binding protein 1 (4E-BP1) (eIF4E-binding protein 1) (Phosphorylated heat- and acid-stable protein regulated by insulin 1) (PHAS-I)
P70445	Eif4ebp2	4EBP2_MOUSE	TB_24H-MOCK_24H	-0.401873	0.252447	0.534828	no	-0.401873	0.534828	Eukaryotic translation initiation factor 4E-binding protein 2 (4E-BP2) (eIF4E-binding protein 2) (Phosphorylated heat- and acid-stable protein regulated by insulin 2) (PHAS-II)
Q6NZJ6	Eif4g1	IF4G1_MOUSE	TB_24H-MOCK_24H	-0.36761	0.00903185	0.0563908	no	-0.36761	0.0563908	Eukaryotic translation initiation factor 4 gamma 1 (eIF-4-gamma 1) (eIF-4G 1) (eIF-4G1)
Q62448	Eif4g2	IF4G2_MOUSE	TB_24H-MOCK_24H	0.0124269	0.933345	0.974291	no	0.0124269	0.974291	Eukaryotic translation initiation factor 4 gamma 2 (eIF-4-gamma 2) (eIF-4G 2) (eIF4G 2) (Novel APOBEC-1 target 1) (Translation repressor NAT1) (p97)
Q80XI3	Eif4g3	IF4G3_MOUSE	TB_24H-MOCK_24H	-0.0951963	0.807708	0.920712	no	-0.0951963	0.920712	Eukaryotic translation initiation factor 4 gamma 3 (eIF-4-gamma 3) (eIF-4G 3) (eIF4G 3) (eIF-4-gamma II) (eIF4GII)
Q9WUK2	Eif4h	IF4H_MOUSE	TB_24H-MOCK_24H	-0.339644	0.456708	0.732326	no	-0.339644	0.732326	Eukaryotic translation initiation factor 4H (eIF-4H) (Williams-Beuren syndrome chromosomal region 1 protein homolog)
P59325	Eif5	IF5_MOUSE	TB_24H-MOCK_24H	-0.185699	0.285203	0.568063	no	-0.185699	0.568063	Eukaryotic translation initiation factor 5 (eIF-5)
P63242	Eif5a	IF5A1_MOUSE	TB_24H-MOCK_24H	-0.656223	0.115991	0.342486	no	-0.656223	0.342486	Eukaryotic translation initiation factor 5A-1 (eIF-5A-1) (eIF-5A1) (Eukaryotic initiation factor 5A isoform 1) (eIF-5A) (eIF-4D)
Q05D44	Eif5b	IF2P_MOUSE	TB_24H-MOCK_24H	-0.117723	0.534936	0.780088	no	-0.117723	0.780088	Eukaryotic translation initiation factor 5B (eIF-5B) (EC 3.6.5.3) (Translation initiation factor IF-2)
O55135	Eif6	IF6_MOUSE	TB_24H-MOCK_24H	-0.18589	0.323484	0.610237	no	-0.18589	0.610237	Eukaryotic translation initiation factor 6 (eIF-6) (B4 integrin interactor) (CAB) (p27(BBP))
Q8K0G5	Eipr1	TSSC1_MOUSE	TB_24H-MOCK_24H	0.0376216	0.874895	0.945978	no	0.0376216	0.945978	Protein TSSC1 (EARP-interacting protein) (Endosome-associated recycling protein-interacting protein)
Q80Y81	Elac2	RNZ2_MOUSE	TB_24H-MOCK_24H	0.000175768	0.999509	0.999767	no	0.000175768	0.999767	Zinc phosphodiesterase ELAC protein 2 (EC 3.1.26.11) (ElaC homolog protein 2) (Ribonuclease Z 2) (RNase Z 2) (tRNA 3 endonuclease 2) (tRNase Z 2)
P70372	Elavl1	ELAV1_MOUSE	TB_24H-MOCK_24H	-0.520828	0.0765354	0.258159	no	-0.520828	0.258159	ELAV-like protein 1 (Elav-like generic protein) (Hu-antigen R) (HuR) (MelG)
Q3UKU1	Ell2	ELL2_MOUSE	TB_24H-MOCK_24H	#NUM!		0	yes	4.19344	0.045862	RNA polymerase II elongation factor ELL2
Q8BPU7	Elmo1	ELMO1_MOUSE	TB_24H-MOCK_24H	-0.504929	0.00013216	0.00190183	no	-0.504929	0.00190183	Engulfment and cell motility protein 1 (Protein ced-12 homolog)
Q8BHL5	Elmo2	ELMO2_MOUSE	TB_24H-MOCK_24H	-0.612319	0.0462698	0.182208	no	-0.612319	0.182208	Engulfment and cell motility protein 2 (Protein ced-12 homolog A)
Q9JLJ5	Elovl1	ELOV1_MOUSE	TB_24H-MOCK_24H	-0.439763	0.200262	0.469543	no	-0.439763	0.469543	Elongation of very long chain fatty acids protein 1 (EC 2.3.1.199) (3-keto acyl-CoA synthase Elovl1) (ELOVL fatty acid elongase 1) (ELOVL FA elongase 1) (Very long chain 3-ketoacyl-CoA synthase 1) (Very long chain 3-oxoacyl-CoA synthase 1)
Q8BHI7	Elovl5	ELOV5_MOUSE	TB_24H-MOCK_24H	-0.559524	0.308581	0.595472	no	-0.559524	0.595472	Elongation of very long chain fatty acids protein 5 (EC 2.3.1.199) (3-keto acyl-CoA synthase Elovl5) (ELOVL fatty acid elongase 5) (ELOVL FA elongase 5) (Very long chain 3-ketoacyl-CoA synthase 5) (Very long chain 3-oxoacyl-CoA synthase 5)
Q91WG4	Elp2	ELP2_MOUSE	TB_24H-MOCK_24H	-1.04477	0.0468777	0.18404	no	-1.04477	0.18404	Elongator complex protein 2 (ELP2) (STAT3-interacting protein 1) (StIP1)
Q9CZX0	Elp3	ELP3_MOUSE	TB_24H-MOCK_24H	-0.665859	0.0339006	0.146789	no	-0.665859	0.146789	Elongator complex protein 3 (EC 2.3.1.48)
Q9ER73	Elp4	ELP4_MOUSE	TB_24H-MOCK_24H	0.166692	0.743358	0.889502	no	0.166692	0.889502	Elongator complex protein 4 (PAX6 neighbor gene protein)
P21995	Emb	EMB_MOUSE	TB_24H-MOCK_24H	0.580106	0.010639	0.0644498	no	0.580106	0.0644498	Embigin (Teratocarcinoma glycoprotein Gp-70)
Q8C7X2	Emc1	EMC1_MOUSE	TB_24H-MOCK_24H	-0.24982	0.227421	0.50363	no	-0.24982	0.50363	ER membrane protein complex subunit 1
Q3TAS6	Emc10	EMC10_MOUSE	TB_24H-MOCK_24H	-0.21561	0.469885	0.742121	no	-0.21561	0.742121	ER membrane protein complex subunit 10 (Hematopoietic signal peptide-containing membrane domain-containing protein 1)
Q9CRD2	Emc2	EMC2_MOUSE	TB_24H-MOCK_24H	-0.367871	0.153178	0.403918	no	-0.367871	0.403918	ER membrane protein complex subunit 2 (Tetratricopeptide repeat protein 35) (TPR repeat protein 35)
Q99KI3	Emc3	EMC3_MOUSE	TB_24H-MOCK_24H	-0.37359	0.0894608	0.283158	no	-0.37359	0.283158	ER membrane protein complex subunit 3 (Transmembrane protein 111)
Q9CZX9	Emc4	EMC4_MOUSE	TB_24H-MOCK_24H	-0.235264	0.44497	0.723123	no	-0.235264	0.723123	ER membrane protein complex subunit 4 (Transmembrane protein 85)
Q9EP72	Emc7	EMC7_MOUSE	TB_24H-MOCK_24H	-0.524368	0.0890626	0.282359	no	-0.524368	0.282359	ER membrane protein complex subunit 7
O70378	Emc8	EMC8_MOUSE	TB_24H-MOCK_24H	-0.285719	0.366361	0.654191	no	-0.285719	0.654191	ER membrane protein complex subunit 8 (Neighbor of COX4)
O08579	Emd	EMD_MOUSE	TB_24H-MOCK_24H	0.0238723	0.844411	0.935255	no	0.0238723	0.935255	Emerin
Q7TNG5	Eml2	EMAL2_MOUSE	TB_24H-MOCK_24H	-0.0248204	0.856026	0.941653	no	-0.0248204	0.941653	Echinoderm microtubule-associated protein-like 2 (EMAP-2)
Q8VC03	Eml3	EMAL3_MOUSE	TB_24H-MOCK_24H	-0.537543	0.00472448	0.0339935	no	-0.537543	0.0339935	Echinoderm microtubule-associated protein-like 3 (EMAP-3)
Q3UMY5	Eml4	EMAL4_MOUSE	TB_24H-MOCK_24H	-0.31768	0.0843671	0.274441	no	-0.31768	0.274441	Echinoderm microtubule-associated protein-like 4 (EMAP-4)
Q8C522	Endod1	ENDD1_MOUSE	TB_24H-MOCK_24H	-0.120075	0.386967	0.669623	no	-0.120075	0.669623	Endonuclease domain-containing 1 protein (EC 3.1.30.-)
P17182	Eno1	ENOA_MOUSE	TB_24H-MOCK_24H	0.0119124	0.89018	0.952356	no	0.0119124	0.952356	Alpha-enolase (EC 4.2.1.11) (2-phospho-D-glycerate hydro-lyase) (Enolase 1) (Non-neural enolase) (NNE)
Q8BGB7	Enoph1	ENOPH_MOUSE	TB_24H-MOCK_24H	0.57869	0.18974	0.456631	no	0.57869	0.456631	Enolase-phosphatase E1 (EC 3.1.3.77) (2,3-diketo-5-methylthio-1-phosphopentane phosphatase) (MASA homolog)
P55772	Entpd1	ENTP1_MOUSE	TB_24H-MOCK_24H	0.199907	0.140528	0.386352	no	0.199907	0.386352	Ectonucleoside triphosphate diphosphohydrolase 1 (NTPDase 1) (EC 3.6.1.5) (Ecto-ATP diphosphohydrolase 1) (Ecto-ATPDase 1) (Ecto-ATPase 1) (Ecto-apyrase) (Lymphoid cell activation antigen) (CD antigen CD39)
Q9JIX0	Eny2	ENY2_MOUSE	TB_24H-MOCK_24H	-0.221744	0.55302	0.790296	no	-0.221744	0.790296	Transcription and mRNA export factor ENY2 (Enhancer of yellow 2 transcription factor homolog)
B2RWS6	Ep300	EP300_MOUSE	TB_24H-MOCK_24H	-0.155791	0.517183	0.772261	no	-0.155791	0.772261	Histone acetyltransferase p300 (p300 HAT) (EC 2.3.1.48) (E1A-associated protein p300)
Q8CHI8	Ep400	EP400_MOUSE	TB_24H-MOCK_24H	0.0802886	0.831217	0.929685	no	0.0802886	0.929685	E1A-binding protein p400 (EC 3.6.4.-) (Domino homolog) (mDomino) (p400 kDa SWI2/SNF2-related protein)
P48193	Epb41	41_MOUSE	TB_24H-MOCK_24H	-0.930542	1.05076e-05	0.000222267	no	-0.930542	0.000222267	Protein 4.1 (P4.1) (4.1R) (Band 4.1)
Q9Z2H5	Epb41l1	E41L1_MOUSE	TB_24H-MOCK_24H	0.00752368	0.970793	0.989974	no	0.00752368	0.989974	Band 4.1-like protein 1 (Neuronal protein 4.1) (4.1N)
O70318	Epb41l2	E41L2_MOUSE	TB_24H-MOCK_24H	-0.205549	0.423434	0.703783	no	-0.205549	0.703783	Band 4.1-like protein 2 (Generally expressed protein 4.1) (4.1G)
Q9D379	Ephx1	HYEP_MOUSE	TB_24H-MOCK_24H	-0.192204	0.577672	0.803523	no	-0.192204	0.803523	Epoxide hydrolase 1 (EC 3.3.2.9) (Epoxide hydratase) (Microsomal epoxide hydrolase)
Q80VP1	Epn1	EPN1_MOUSE	TB_24H-MOCK_24H	-0.0258577	0.884837	0.950126	no	-0.0258577	0.950126	Epsin-1 (EPS-15-interacting protein 1) (Intersectin-EH-binding protein 1) (Ibp1)
Q8CGC7	Eprs	SYEP_MOUSE	TB_24H-MOCK_24H	-0.247635	0.0231457	0.113271	no	-0.247635	0.113271	Bifunctional glutamate/proline--tRNA ligase (Bifunctional aminoacyl-tRNA synthetase) [Includes: Glutamate--tRNA ligase (EC 6.1.1.17) (Glutamyl-tRNA synthetase) (GluRS); Proline--tRNA ligase (EC 6.1.1.15) (Prolyl-tRNA synthetase) (ProRS)]
P42567	Eps15	EPS15_MOUSE	TB_24H-MOCK_24H	-0.0588774	0.711114	0.873322	no	-0.0588774	0.873322	Epidermal growth factor receptor substrate 15 (Protein Eps15) (Protein AF-1p)
Q60902	Eps15l1	EP15R_MOUSE	TB_24H-MOCK_24H	-0.14065	0.605361	0.81865	no	-0.14065	0.81865	Epidermal growth factor receptor substrate 15-like 1 (Epidermal growth factor receptor pathway substrate 15-related sequence) (Eps15-rs) (Eps15-related protein) (Eps15R)
Q08509	Eps8	EPS8_MOUSE	TB_24H-MOCK_24H	0.0347289	0.914956	0.964541	no	0.0347289	0.964541	Epidermal growth factor receptor kinase substrate 8
Q8VDI1	Epsti1	ESIP1_MOUSE	TB_24H-MOCK_24H	2.34151	1.97529e-08	8.99572e-07	no	2.34151	8.99572e-07	Epithelial-stromal interaction protein 1
Q9EQH2	Erap1	ERAP1_MOUSE	TB_24H-MOCK_24H	0.238976	0.47086	0.742747	no	0.238976	0.742747	Endoplasmic reticulum aminopeptidase 1 (EC 3.4.11.-) (ARTS-1) (Adipocyte-derived leucine aminopeptidase) (A-LAP) (Aminopeptidase PILS) (Puromycin-insensitive leucyl-specific aminopeptidase) (PILS-AP) (VEGF-induced aminopeptidase)
Q80TH2	Erbin	ERBIN_MOUSE	TB_24H-MOCK_24H	0.0269158	0.879995	0.948507	no	0.0269158	0.948507	Erbin (Densin-180-like protein) (Erbb2-interacting protein) (Protein LAP2)
Q8BHK9	Ercc6l	ERC6L_MOUSE	TB_24H-MOCK_24H	-0.397855	0.15309	0.403918	no	-0.397855	0.403918	DNA excision repair protein ERCC-6-like (EC 3.6.4.12) (ATP-dependent helicase ERCC6-like)
Q9DC16	Ergic1	ERGI1_MOUSE	TB_24H-MOCK_24H	-0.626412	0.242835	0.523736	no	-0.626412	0.523736	Endoplasmic reticulum-Golgi intermediate compartment protein 1 (ER-Golgi intermediate compartment 32 kDa protein) (ERGIC-32)
P84089	Erh	ERH_MOUSE	TB_24H-MOCK_24H	-0.0933312	0.429002	0.707817	no	-0.0933312	0.707817	Enhancer of rudimentary homolog (Mer)
Q91X78	Erlin1	ERLN1_MOUSE	TB_24H-MOCK_24H	-0.274672	0.134816	0.375717	no	-0.274672	0.375717	Erlin-1 (Endoplasmic reticulum lipid raft-associated protein 1) (Protein KE04 homolog) (Stomatin-prohibitin-flotillin-HflC/K domain-containing protein 1) (SPFH domain-containing protein 1)
Q8BFZ9	Erlin2	ERLN2_MOUSE	TB_24H-MOCK_24H	0.105144	0.368353	0.656792	no	0.105144	0.656792	Erlin-2 (Endoplasmic reticulum lipid raft-associated protein 2) (Stomatin-prohibitin-flotillin-HflC/K domain-containing protein 2) (SPFH domain-containing protein 2)
Q3UVK0	Ermp1	ERMP1_MOUSE	TB_24H-MOCK_24H	-0.510925	0.0733661	0.24978	no	-0.510925	0.24978	Endoplasmic reticulum metallopeptidase 1 (EC 3.4.-.-) (Felix-ina)
Q8R180	Ero1a	ERO1A_MOUSE	TB_24H-MOCK_24H	0.704929	0.0261092	0.123556	no	0.704929	0.123556	ERO1-like protein alpha (ERO1-L) (ERO1-L-alpha) (EC 1.8.4.-) (Endoplasmic reticulum oxidoreductase alpha) (Endoplasmic reticulum oxidoreductin-1-like protein) (Oxidoreductin-1-L-alpha)
P57759	Erp29	ERP29_MOUSE	TB_24H-MOCK_24H	-0.459433	0.0286931	0.131445	no	-0.459433	0.131445	Endoplasmic reticulum resident protein 29 (ERp29)
Q9D1Q6	Erp44	ERP44_MOUSE	TB_24H-MOCK_24H	0.162055	0.255078	0.538096	no	0.162055	0.538096	Endoplasmic reticulum resident protein 44 (ER protein 44) (ERp44) (Thioredoxin domain-containing protein 4)
Q9R0P3	Esd	ESTD_MOUSE	TB_24H-MOCK_24H	0.19236	0.0577585	0.212734	no	0.19236	0.212734	S-formylglutathione hydrolase (FGH) (EC 3.1.2.12) (Esterase 10) (Esterase D) (Sid 478)
Q3U7R1	Esyt1	ESYT1_MOUSE	TB_24H-MOCK_24H	0.183782	0.173257	0.432695	no	0.183782	0.432695	Extended synaptotagmin-1 (E-Syt1) (Membrane-bound C2 domain-containing protein)
Q3TZZ7	Esyt2	ESYT2_MOUSE	TB_24H-MOCK_24H	-0.298851	0.186928	0.453383	no	-0.298851	0.453383	Extended synaptotagmin-2 (E-Syt2)
Q8BWY3	Etf1	ERF1_MOUSE	TB_24H-MOCK_24H	0.0488052	0.784038	0.908687	no	0.0488052	0.908687	Eukaryotic peptide chain release factor subunit 1 (Eukaryotic release factor 1) (eRF1)
Q99LC5	Etfa	ETFA_MOUSE	TB_24H-MOCK_24H	0.0591159	0.430468	0.708265	no	0.0591159	0.708265	Electron transfer flavoprotein subunit alpha, mitochondrial (Alpha-ETF)
Q9DCW4	Etfb	ETFB_MOUSE	TB_24H-MOCK_24H	0.129376	0.476298	0.747063	no	0.129376	0.747063	Electron transfer flavoprotein subunit beta (Beta-ETF)
Q921G7	Etfdh	ETFD_MOUSE	TB_24H-MOCK_24H	-0.142813	0.274242	0.558145	no	-0.142813	0.558145	Electron transfer flavoprotein-ubiquinone oxidoreductase, mitochondrial (ETF-QO) (ETF-ubiquinone oxidoreductase) (EC 1.5.5.1) (Electron-transferring-flavoprotein dehydrogenase) (ETF dehydrogenase)
Q9DCM0	Ethe1	ETHE1_MOUSE	TB_24H-MOCK_24H	0.087443	0.737577	0.885642	no	0.087443	0.885642	Persulfide dioxygenase ETHE1, mitochondrial (EC 1.13.11.18) (Ethylmalonic encephalopathy protein 1 homolog) (Hepatoma subtracted clone one protein) (Sulfur dioxygenase ETHE1)
P97360	Etv6	ETV6_MOUSE	TB_24H-MOCK_24H	1.16737	0.00162192	0.0149385	no	1.16737	0.0149385	Transcription factor ETV6 (ETS translocation variant 6) (ETS-related protein Tel1) (Tel)
P20934	Evi2a	EVI2A_MOUSE	TB_24H-MOCK_24H	-0.936205	0.000282706	0.00364785	no	-0.936205	0.00364785	Protein EVI2A (Ecotropic viral integration site 2A protein) (EVI-2A)
Q8VD58	Evi2b	EVI2B_MOUSE	TB_24H-MOCK_24H	-0.655872	0.0454271	0.180357	no	-0.655872	0.180357	Protein EVI2B (Ecotropic viral integration site 2B protein) (EVI-2B) (CD antigen CD361)
P97366	Evi5	EVI5_MOUSE	TB_24H-MOCK_24H	-0.495725	0.363146	0.651408	no	-0.495725	0.651408	Ecotropic viral integration site 5 protein (EVI-5)
P70429	Evl	EVL_MOUSE	TB_24H-MOCK_24H	0.465679	0.00015466	0.00217704	no	0.465679	0.00217704	Ena/VASP-like protein (Ena/vasodilator-stimulated phosphoprotein-like)
Q61545	Ewsr1	EWS_MOUSE	TB_24H-MOCK_24H	-0.383517	0.319125	0.604528	no	-0.383517	0.604528	RNA-binding protein EWS
Q8R3S6	Exoc1	EXOC1_MOUSE	TB_24H-MOCK_24H	-0.0929736	0.705665	0.872317	no	-0.0929736	0.872317	Exocyst complex component 1 (Exocyst complex component Sec3)
Q9D4H1	Exoc2	EXOC2_MOUSE	TB_24H-MOCK_24H	-0.370783	0.101244	0.310305	no	-0.370783	0.310305	Exocyst complex component 2 (Exocyst complex component Sec5)
Q6KAR6	Exoc3	EXOC3_MOUSE	TB_24H-MOCK_24H	-0.0884505	0.603748	0.818006	no	-0.0884505	0.818006	Exocyst complex component 3 (Exocyst complex component Sec6)
O35382	Exoc4	EXOC4_MOUSE	TB_24H-MOCK_24H	-0.170955	0.38898	0.671313	no	-0.170955	0.671313	Exocyst complex component 4 (Exocyst complex component Sec8)
Q3TPX4	Exoc5	EXOC5_MOUSE	TB_24H-MOCK_24H	0.268066	0.195629	0.464725	no	0.268066	0.464725	Exocyst complex component 5 (Exocyst complex component Sec10)
Q8R313	Exoc6	EXOC6_MOUSE	TB_24H-MOCK_24H	0.189196	0.341057	0.628083	no	0.189196	0.628083	Exocyst complex component 6 (Exocyst complex component Sec15A) (SEC15-like protein 1)
A6H5Z3	Exoc6b	EXC6B_MOUSE	TB_24H-MOCK_24H	-0.181631	0.41307	0.693097	no	-0.181631	0.693097	Exocyst complex component 6B (Exocyst complex component Sec15B) (SEC15-like protein 2)
O35250	Exoc7	EXOC7_MOUSE	TB_24H-MOCK_24H	0.0318101	0.866264	0.945551	no	0.0318101	0.945551	Exocyst complex component 7 (Exocyst complex component Exo70)
Q6PGF7	Exoc8	EXOC8_MOUSE	TB_24H-MOCK_24H	-0.243188	0.069974	0.241546	no	-0.243188	0.241546	Exocyst complex component 8 (Exocyst complex 84 kDa subunit)
Q8C163	Exog	EXOG_MOUSE	TB_24H-MOCK_24H	0.22146	0.601628	0.816872	no	0.22146	0.816872	Nuclease EXOG, mitochondrial (EC 3.1.30.-) (Endonuclease G-like 1) (Endo G-like 1)
Q9DAA6	Exosc1	EXOS1_MOUSE	TB_24H-MOCK_24H	-0.476688	0.0852731	0.275766	no	-0.476688	0.275766	Exosome complex component CSL4 (Exosome component 1)
P56960	Exosc10	EXOSX_MOUSE	TB_24H-MOCK_24H	-0.551483	0.200954	0.469741	no	-0.551483	0.469741	Exosome component 10 (EC 3.1.13.-) (Autoantigen PM/Scl 2 homolog) (Polymyositis/scleroderma autoantigen 2 homolog)
Q8VBV3	Exosc2	EXOS2_MOUSE	TB_24H-MOCK_24H	0.27835	0.334171	0.621016	no	0.27835	0.621016	Exosome complex component RRP4 (Exosome component 2) (Ribosomal RNA-processing protein 4)
Q921I9	Exosc4	EXOS4_MOUSE	TB_24H-MOCK_24H	-0.103491	0.732517	0.883396	no	-0.103491	0.883396	Exosome complex component RRP41 (Exosome component 4) (Ribosomal RNA-processing protein 41)
Q9D0M0	Exosc7	EXOS7_MOUSE	TB_24H-MOCK_24H	-0.170705	0.682851	0.857683	no	-0.170705	0.857683	Exosome complex exonuclease RRP42 (Exosome component 7) (Ribosomal RNA-processing protein 42)
Q9D753	Exosc8	EXOS8_MOUSE	TB_24H-MOCK_24H	-0.435033	0.0452534	0.179852	no	-0.435033	0.179852	Exosome complex component RRP43 (Exosome component 8) (Ribosomal RNA-processing protein 43)
P26040	Ezr	EZRI_MOUSE	TB_24H-MOCK_24H	0.873595	2.52535e-06	6.43133e-05	no	0.873595	6.43133e-05	Ezrin (Cytovillin) (Villin-2) (p81)
Q8BH61	F13a1	F13A_MOUSE	TB_24H-MOCK_24H	0.0174395	0.956428	0.982572	no	0.0174395	0.982572	Coagulation factor XIII A chain (Coagulation factor XIIIa) (EC 2.3.2.13) (Protein-glutamine gamma-glutamyltransferase A chain) (Transglutaminase A chain)
P04117	Fabp4	FABP4_MOUSE	TB_24H-MOCK_24H	0.279305	0.246835	0.528484	no	0.279305	0.528484	Fatty acid-binding protein, adipocyte (3T3-L1 lipid-binding protein) (Adipocyte lipid-binding protein) (ALBP) (Adipocyte-type fatty acid-binding protein) (A-FABP) (AFABP) (Fatty acid-binding protein 4) (Myelin P2 protein homolog) (P15) (P2 adipocyte protein) (Protein 422)
Q05816	Fabp5	FABP5_MOUSE	TB_24H-MOCK_24H	-0.0582148	0.839676	0.933307	no	-0.0582148	0.933307	Fatty acid-binding protein, epidermal (Epidermal-type fatty acid-binding protein) (E-FABP) (Fatty acid-binding protein 5) (Keratinocyte lipid-binding protein) (Psoriasis-associated fatty acid-binding protein homolog) (PA-FABP)
P51880	Fabp7	FABP7_MOUSE	TB_24H-MOCK_24H	-0.297316	0.4414	0.720345	no	-0.297316	0.720345	Fatty acid-binding protein, brain (Brain lipid-binding protein) (BLBP) (Brain-type fatty acid-binding protein) (B-FABP) (Fatty acid-binding protein 7)
Q920L1	Fads1	FADS1_MOUSE	TB_24H-MOCK_24H	#NUM!		0	yes	-5.19691	0.0239329	Fatty acid desaturase 1 (EC 1.14.19.-) (Delta(5) fatty acid desaturase) (D5D) (Delta(5) desaturase) (Delta-5 desaturase)
P54731	Faf1	FAF1_MOUSE	TB_24H-MOCK_24H	-0.401312	0.0107845	0.0649247	no	-0.401312	0.0649247	FAS-associated factor 1
Q3TDN2	Faf2	FAF2_MOUSE	TB_24H-MOCK_24H	0.540384	0.053636	0.200798	no	0.540384	0.200798	FAS-associated factor 2 (UBX domain-containing protein 8)
Q9WUD8	Faim	FAIM1_MOUSE	TB_24H-MOCK_24H	-0.431761	0.095471	0.297081	no	-0.431761	0.297081	Fas apoptotic inhibitory molecule 1
Q9D2L9	Fam111a	F111A_MOUSE	TB_24H-MOCK_24H	#NUM!		0	yes	-5.5584	0.0189804	Protein FAM111A
Q8VE88	Fam114a2	F1142_MOUSE	TB_24H-MOCK_24H	-0.219283	0.221663	0.495127	no	-0.219283	0.495127	Protein FAM114A2
Q6A0A9	FAM120A	F120A_MOUSE	TB_24H-MOCK_24H	-0.0944379	0.602732	0.81756	no	-0.0944379	0.81756	Constitutive coactivator of PPAR-gamma-like protein 1 (Oxidative stress-associated Src activator) (Protein FAM120A)
Q6P9N1	Fam126a	HYCCI_MOUSE	TB_24H-MOCK_24H	-0.328305	0.383218	0.667613	no	-0.328305	0.667613	Hyccin (Down-regulated by CTNNB1 protein A) (Protein FAM126A)
Q3UW53	Fam129a	NIBAN_MOUSE	TB_24H-MOCK_24H	-0.273954	0.130319	0.367243	no	-0.273954	0.367243	Protein Niban (Protein FAM129A)
Q8R1F1	Fam129b	NIBL1_MOUSE	TB_24H-MOCK_24H	0.126478	0.128699	0.363645	no	0.126478	0.363645	Niban-like protein 1 (Protein FAM129B)
Q8VE91	Fam134b	F134B_MOUSE	TB_24H-MOCK_24H	-0.581755	0.0431654	0.173333	no	-0.581755	0.173333	Reticulophagy receptor Fam134b
Q9CQV4	Fam134c	F134C_MOUSE	TB_24H-MOCK_24H	0.264135	0.0757806	0.256422	no	0.264135	0.256422	Protein FAM134C
Q9CR98	Fam136a	F136A_MOUSE	TB_24H-MOCK_24H	-0.278658	0.433455	0.711277	no	-0.278658	0.711277	Protein FAM136A
Q8CDM8	Fam160b1	F16B1_MOUSE	TB_24H-MOCK_24H	-0.074459	0.83017	0.92932	no	-0.074459	0.92932	Protein FAM160B1
Q9D6U8	Fam162a	F162A_MOUSE	TB_24H-MOCK_24H	0.0704148	0.675099	0.853744	no	0.0704148	0.853744	Protein FAM162A (E2-induced gene 5 protein homolog) (Growth and transformation-dependent protein) (HGTD-P)
Q80XQ8	Fam168b	F168B_MOUSE	TB_24H-MOCK_24H	#NUM!		0	yes	-6.56773	0.0393526	Myelin-associated neurite-outgrowth inhibitor (Mani)
Q3TCJ1	Fam175b	F175B_MOUSE	TB_24H-MOCK_24H	-0.449983	0.249834	0.53167	no	-0.449983	0.53167	BRISC complex subunit Abro1 (Abraxas brother protein 1) (Protein FAM175B)
Q8BR63	Fam177a1	F177A_MOUSE	TB_24H-MOCK_24H	0.117302	0.523326	0.774682	no	0.117302	0.774682	Protein FAM177A1
Q80ZQ9	Fam206a	F206A_MOUSE	TB_24H-MOCK_24H	-0.185953	0.587821	0.809651	no	-0.185953	0.809651	Protein Simiate (Protein FAM206A)
Q5MJS3	Fam20c	FA20C_MOUSE	TB_24H-MOCK_24H	0.301509	0.24238	0.523301	no	0.301509	0.523301	Extracellular serine/threonine protein kinase FAM20C (EC 2.7.11.1) (Dentin matrix protein 4) (DMP-4) (Golgi-enriched fraction casein kinase) (GEF-CK)
Q6PGL7	Fam21	FAM21_MOUSE	TB_24H-MOCK_24H	-0.0450676	0.772122	0.904352	no	-0.0450676	0.904352	WASH complex subunit FAM21
Q9DB60	Fam213b	PGFS_MOUSE	TB_24H-MOCK_24H	-0.340875	0.140292	0.386352	no	-0.340875	0.386352	Prostamide/prostaglandin F synthase (Prostamide/PG F synthase) (Prostamide/PGF synthase) (EC 1.11.1.20)
Q8C0Z1	Fam234a	F234A_MOUSE	TB_24H-MOCK_24H	-0.787626	0.14098	0.386772	no	-0.787626	0.386772	Protein FAM234A (Protein ITFG3)
Q91VU0	Fam3c	FAM3C_MOUSE	TB_24H-MOCK_24H	-0.461933	0.313521	0.599632	no	-0.461933	0.599632	Protein FAM3C (Interleukin-like EMT inducer)
Q9D8N2	Fam45a	FA45A_MOUSE	TB_24H-MOCK_24H	-0.307819	0.370687	0.65751	no	-0.307819	0.65751	Protein FAM45A
Q8BHZ0	Fam49a	FA49A_MOUSE	TB_24H-MOCK_24H	-0.0709625	0.671797	0.851315	no	-0.0709625	0.851315	Protein FAM49A
Q921M7	Fam49b	FA49B_MOUSE	TB_24H-MOCK_24H	-0.094349	0.445465	0.723321	no	-0.094349	0.723321	Protein FAM49B
Q9WV03	Fam50a	FA50A_MOUSE	TB_24H-MOCK_24H	-0.543659	0.282711	0.56586	no	-0.543659	0.56586	Protein FAM50A (Protein XAP-5)
Q76LS9	Fam63a	FA63A_MOUSE	TB_24H-MOCK_24H	-0.394445	0.108805	0.326498	no	-0.394445	0.326498	Ubiquitin carboxyl-terminal hydrolase MINDY-1 (EC 3.4.19.12) (Deubiquitinating enzyme MINDY-1) (NF-E2 inducible protein) (Protein FAM63A)
Q6PDI6	Fam63b	FA63B_MOUSE	TB_24H-MOCK_24H	-0.103609	0.851973	0.939608	no	-0.103609	0.939608	Ubiquitin carboxyl-terminal hydrolase MINDY-2 (EC 3.4.19.12) (Deubiquitinating enzyme MINDY-2) (Protein FAM63B)
Q80U16	Fam65b	FA65B_MOUSE	TB_24H-MOCK_24H	2.43773	0.000386501	0.0045894	no	2.43773	0.0045894	Protein FAM65B
Q922G2	Fam76a	FA76A_MOUSE	TB_24H-MOCK_24H	-0.21015	0.603558	0.818006	no	-0.21015	0.818006	Protein FAM76A
Q80XP8	Fam76b	FA76B_MOUSE	TB_24H-MOCK_24H	-0.420482	0.458637	0.733477	no	-0.420482	0.733477	Protein FAM76B
Q9QUI1	Fam89b	FA89B_MOUSE	TB_24H-MOCK_24H	-0.159168	0.640612	0.83692	no	-0.159168	0.83692	Protein FAM89B (C184L ORF2 protein) (C184M protein) (MMTV receptor)
Q3UVG3	Fam91a1	F91A1_MOUSE	TB_24H-MOCK_24H	0.287745	0.280515	0.562628	no	0.287745	0.562628	Protein FAM91A1
Q9D187	Fam96b	MIP18_MOUSE	TB_24H-MOCK_24H	-0.275992	0.470067	0.742121	no	-0.275992	0.742121	Mitotic spindle-associated MMXD complex subunit MIP18 (Protein FAM96B)
Q80VD1	Fam98b	FA98B_MOUSE	TB_24H-MOCK_24H	-0.154722	0.533071	0.778986	no	-0.154722	0.778986	Protein FAM98B
Q922J9	Far1	FACR1_MOUSE	TB_24H-MOCK_24H	-0.523378	0.0995395	0.306334	no	-0.523378	0.306334	Fatty acyl-CoA reductase 1 (EC 1.2.1.n2) (Male sterility domain-containing protein 2)
Q8C0C7	Farsa	SYFA_MOUSE	TB_24H-MOCK_24H	-0.207067	0.17423	0.434006	no	-0.207067	0.434006	Phenylalanine--tRNA ligase alpha subunit (EC 6.1.1.20) (Phenylalanyl-tRNA synthetase alpha subunit) (PheRS)
Q9WUA2	Farsb	SYFB_MOUSE	TB_24H-MOCK_24H	-0.162834	0.123936	0.356345	no	-0.162834	0.356345	Phenylalanine--tRNA ligase beta subunit (EC 6.1.1.20) (Phenylalanyl-tRNA synthetase beta subunit) (PheRS)
P19096	Fasn	FAS_MOUSE	TB_24H-MOCK_24H	-0.423835	0.000429363	0.0050144	no	-0.423835	0.0050144	Fatty acid synthase (EC 2.3.1.85) [Includes: [Acyl-carrier-protein] S-acetyltransferase (EC 2.3.1.38); [Acyl-carrier-protein] S-malonyltransferase (EC 2.3.1.39); 3-oxoacyl-[acyl-carrier-protein] synthase (EC 2.3.1.41); 3-oxoacyl-[acyl-carrier-protein] reductase (EC 1.1.1.100); 3-hydroxyacyl-[acyl-carrier-protein] dehydratase (EC 4.2.1.59); Enoyl-[acyl-carrier-protein] reductase (EC 1.3.1.39); Ole…
P62862	Fau	RS30_MOUSE	TB_24H-MOCK_24H	-0.341301	0.0367097	0.155135	no	-0.341301	0.155135	40S ribosomal protein S30
P35550	Fbl	FBRL_MOUSE	TB_24H-MOCK_24H	-0.251906	0.066003	0.23206	no	-0.251906	0.23206	rRNA 2'-O-methyltransferase fibrillarin (EC 2.1.1.-) (Histone-glutamine methyltransferase) (Nucleolar protein 1)
Q71FD7	Fblim1	FBLI1_MOUSE	TB_24H-MOCK_24H	0.0512143	0.874891	0.945978	no	0.0512143	0.945978	Filamin-binding LIM protein 1 (FBLP-1) (CSX-associated LIM)
Q9CZV8	Fbxl20	FXL20_MOUSE	TB_24H-MOCK_24H	0.374746	0.214709	0.484854	no	0.374746	0.484854	F-box/LRR-repeat protein 20 (F-box and leucine-rich repeat protein 20) (F-box/LRR-repeat protein 2-like)
Q9DC63	Fbxo3	FBX3_MOUSE	TB_24H-MOCK_24H	-1.13259	0.0237954	0.115284	no	-1.13259	0.115284	F-box only protein 3
Q8CHQ0	Fbxo4	FBX4_MOUSE	TB_24H-MOCK_24H	0.367143	0.207202	0.476576	no	0.367143	0.476576	F-box only protein 4
P20491	Fcer1g	FCERG_MOUSE	TB_24H-MOCK_24H	0.84911	3.67978e-07	1.16758e-05	no	0.84911	1.16758e-05	High affinity immunoglobulin epsilon receptor subunit gamma (Fc receptor gamma-chain) (FcRgamma) (Fc-epsilon RI-gamma) (IgE Fc receptor subunit gamma) (FceRI gamma)
P26151	Fcgr1	FCGR1_MOUSE	TB_24H-MOCK_24H	1.42908	5.2846e-09	2.79e-07	no	1.42908	2.79e-07	High affinity immunoglobulin gamma Fc receptor I (IgG Fc receptor I) (Fc-gamma RI) (FcRI) (CD antigen CD64)
P08101	Fcgr2	FCGR2_MOUSE	TB_24H-MOCK_24H	2.70023	3.00438e-09	1.76211e-07	no	2.70023	1.76211e-07	Low affinity immunoglobulin gamma Fc region receptor II (Fc gamma receptor IIB) (Fc-gamma RII) (Fc-gamma-RIIB) (FcRII) (IgG Fc receptor II beta) (Lymphocyte antigen 17) (Ly-17) (CD antigen CD32)
P08508	Fcgr3	FCGR3_MOUSE	TB_24H-MOCK_24H	-0.186355	0.564427	0.796719	no	-0.186355	0.796719	Low affinity immunoglobulin gamma Fc region receptor III (IgG Fc receptor III) (Fc-gamma RIII) (FcRIII) (CD antigen CD16)
Q61559	Fcgrt	FCGRN_MOUSE	TB_24H-MOCK_24H	0.0754121	0.673859	0.852732	no	0.0754121	0.852732	IgG receptor FcRn large subunit p51 (FcRn) (IgG Fc fragment receptor transporter alpha chain) (Neonatal Fc receptor)
Q3UQN2	Fcho2	FCHO2_MOUSE	TB_24H-MOCK_24H	0.368165	0.124104	0.356345	no	0.368165	0.356345	F-BAR domain only protein 2
Q920E5	Fdps	FPPS_MOUSE	TB_24H-MOCK_24H	-0.289292	0.121919	0.353255	no	-0.289292	0.353255	Farnesyl pyrophosphate synthase (FPP synthase) (FPS) (EC 2.5.1.10) ((2E,6E)-farnesyl diphosphate synthase) (Cholesterol-regulated 39 kDa protein) (CR 39) (Dimethylallyltranstransferase) (EC 2.5.1.1) (Farnesyl diphosphate synthase) (Geranyltranstransferase)
Q61578	Fdxr	ADRO_MOUSE	TB_24H-MOCK_24H	-0.177703	0.455616	0.732262	no	-0.177703	0.732262	NADPH:adrenodoxin oxidoreductase, mitochondrial (AR) (Adrenodoxin reductase) (EC 1.18.1.6) (Ferredoxin--NADP(+) reductase) (Ferredoxin reductase)
P22315	Fech	HEMH_MOUSE	TB_24H-MOCK_24H	0.223457	0.53303	0.778986	no	0.223457	0.778986	Ferrochelatase, mitochondrial (EC 4.99.1.1) (Heme synthase) (Protoheme ferro-lyase)
P39749	Fen1	FEN1_MOUSE	TB_24H-MOCK_24H	-0.679514	0.000306231	0.00387393	no	-0.679514	0.00387393	Flap endonuclease 1 (FEN-1) (EC 3.1.-.-) (Flap structure-specific endonuclease 1)
Q8K1B8	Fermt3	URP2_MOUSE	TB_24H-MOCK_24H	0.222797	0.101702	0.310971	no	0.222797	0.310971	Fermitin family homolog 3 (Kindlin-3) (Unc-112-related protein 2)
P16879	Fes	FES_MOUSE	TB_24H-MOCK_24H	-0.0128618	0.926674	0.970813	no	-0.0128618	0.970813	Tyrosine-protein kinase Fes/Fps (EC 2.7.10.2) (Proto-oncogene c-Fes)
Q6TYB5	Fez2	FEZ2_MOUSE	TB_24H-MOCK_24H	0.178623	0.516819	0.772261	no	0.178623	0.772261	Fasciculation and elongation protein zeta-2 (Zygin II) (Zygin-2)
Q8BY35	Fgd2	FGD2_MOUSE	TB_24H-MOCK_24H	0.0747636	0.907259	0.959775	no	0.0747636	0.959775	FYVE, RhoGEF and PH domain-containing protein 2
O88842	Fgd3	FGD3_MOUSE	TB_24H-MOCK_24H	-1.45717	5.99671e-08	2.32133e-06	no	-1.45717	2.32133e-06	FYVE, RhoGEF and PH domain-containing protein 3
Q91ZT5	Fgd4	FGD4_MOUSE	TB_24H-MOCK_24H	-0.885908	0.00166031	0.01523	no	-0.885908	0.01523	FYVE, RhoGEF and PH domain-containing protein 4 (Actin filament-binding protein frabin) (FGD1-related F-actin-binding protein)
Q9CRA9	Fgfr1op2	FGOP2_MOUSE	TB_24H-MOCK_24H	0.27131	0.584546	0.808135	no	0.27131	0.808135	FGFR1 oncogene partner 2 homolog
A2AJL3	Fggy	FGGY_MOUSE	TB_24H-MOCK_24H	-0.329435	0.553269	0.790296	no	-0.329435	0.790296	FGGY carbohydrate kinase domain-containing protein (EC 2.7.1.-)
P97807	Fh	FUMH_MOUSE	TB_24H-MOCK_24H	-0.184053	0.258203	0.541737	no	-0.184053	0.541737	Fumarate hydratase, mitochondrial (Fumarase) (EC 4.2.1.2) (EF-3)
Q9R059	Fhl3	FHL3_MOUSE	TB_24H-MOCK_24H	0.159499	0.811422	0.921929	no	0.159499	0.921929	Four and a half LIM domains protein 3 (FHL-3) (Skeletal muscle LIM-protein 2) (SLIM-2)
Q6P9Q4	Fhod1	FHOD1_MOUSE	TB_24H-MOCK_24H	-0.60187	0.00528682	0.0372096	no	-0.60187	0.0372096	FH1/FH2 domain-containing protein 1 (Formin homolog overexpressed in spleen 1) (FHOS) (Formin homology 2 domain-containing protein 1)
Q6P6L0	Filip1l	FIL1L_MOUSE	TB_24H-MOCK_24H	0.746164	0.0228002	0.112147	no	0.746164	0.112147	Filamin A-interacting protein 1-like (Protein down-regulated in ovarian cancer 1 homolog) (DOC-1)
Q9D824	Fip1l1	FIP1_MOUSE	TB_24H-MOCK_24H	-0.0525007	0.800823	0.916342	no	-0.0525007	0.916342	Pre-mRNA 3'-end-processing factor FIP1 (FIP1-like 1 protein)
Q9CQ92	Fis1	FIS1_MOUSE	TB_24H-MOCK_24H	-1.17678	0.00676372	0.0448328	no	-1.17678	0.0448328	Mitochondrial fission 1 protein (FIS1 homolog) (Tetratricopeptide repeat protein 11) (TPR repeat protein 11)
Q6P9Q6	Fkbp15	FKB15_MOUSE	TB_24H-MOCK_24H	0.159108	0.0864257	0.277901	no	0.159108	0.277901	FK506-binding protein 15 (FKBP-15) (133 kDa FK506-binding protein) (133 kDa FKBP) (FKBP-133) (WASP and FKBP-like) (WAFL)
P26883	Fkbp1a	FKB1A_MOUSE	TB_24H-MOCK_24H	0.140664	0.664155	0.849057	no	0.140664	0.849057	Peptidyl-prolyl cis-trans isomerase FKBP1A (PPIase FKBP1A) (EC 5.2.1.8) (12 kDa FK506-binding protein) (12 kDa FKBP) (FKBP-12) (Calstabin-1) (FK506-binding protein 1A) (FKBP-1A) (Immunophilin FKBP12) (Rotamase)
P45878	Fkbp2	FKBP2_MOUSE	TB_24H-MOCK_24H	0.45819	0.212274	0.482126	no	0.45819	0.482126	Peptidyl-prolyl cis-trans isomerase FKBP2 (PPIase FKBP2) (EC 5.2.1.8) (13 kDa FK506-binding protein) (13 kDa FKBP) (FKBP-13) (FK506-binding protein 2) (FKBP-2) (Immunophilin FKBP13) (Rotamase)
Q62446	Fkbp3	FKBP3_MOUSE	TB_24H-MOCK_24H	-0.376268	0.612224	0.823134	no	-0.376268	0.823134	Peptidyl-prolyl cis-trans isomerase FKBP3 (PPIase FKBP3) (EC 5.2.1.8) (25 kDa FK506-binding protein) (25 kDa FKBP) (FKBP-25) (FK506-binding protein 3) (FKBP-3) (Immunophilin FKBP25) (Rapamycin-selective 25 kDa immunophilin) (Rotamase)
P30416	Fkbp4	FKBP4_MOUSE	TB_24H-MOCK_24H	-0.655169	0.0438865	0.17532	no	-0.655169	0.17532	Peptidyl-prolyl cis-trans isomerase FKBP4 (PPIase FKBP4) (EC 5.2.1.8) (52 kDa FK506-binding protein) (52 kDa FKBP) (FKBP-52) (59 kDa immunophilin) (p59) (FK506-binding protein 4) (FKBP-4) (FKBP59) (HSP-binding immunophilin) (HBI) (Immunophilin FKBP52) (Rotamase) [Cleaved into: Peptidyl-prolyl cis-trans isomerase FKBP4, N-terminally processed]
Q64378	Fkbp5	FKBP5_MOUSE	TB_24H-MOCK_24H	-0.57187	0.0461055	0.181919	no	-0.57187	0.181919	Peptidyl-prolyl cis-trans isomerase FKBP5 (PPIase FKBP5) (EC 5.2.1.8) (51 kDa FK506-binding protein) (51 kDa FKBP) (FKBP-51) (FK506-binding protein 5) (FKBP-5) (Rotamase)
O35465	Fkbp8	FKBP8_MOUSE	TB_24H-MOCK_24H	-0.0640647	0.437269	0.715413	no	-0.0640647	0.715413	Peptidyl-prolyl cis-trans isomerase FKBP8 (PPIase FKBP8) (EC 5.2.1.8) (38 kDa FK506-binding protein) (38 kDa FKBP) (FKBP-38) (mFKBP38) (FK506-binding protein 8) (FKBP-8) (FKBPR38) (Rotamase)
Q8R123	Flad1	FAD1_MOUSE	TB_24H-MOCK_24H	-0.625658	0.478109	0.748601	no	-0.625658	0.748601	FAD synthase (EC 2.7.7.2) (FAD pyrophosphorylase) (FMN adenylyltransferase) (Flavin adenine dinucleotide synthase) [Includes: Molybdenum cofactor biosynthesis protein-like region; FAD synthase region]
Q8QZS3	Flcn	FLCN_MOUSE	TB_24H-MOCK_24H	-0.587258	0.162302	0.417179	no	-0.587258	0.417179	Folliculin
Q9JJ28	Flii	FLII_MOUSE	TB_24H-MOCK_24H	0.273375	0.0389935	0.161539	no	0.273375	0.161539	Protein flightless-1 homolog
Q8BTM8	Flna	FLNA_MOUSE	TB_24H-MOCK_24H	-0.137934	0.159462	0.414003	no	-0.137934	0.414003	Filamin-A (FLN-A) (Actin-binding protein 280) (ABP-280) (Alpha-filamin) (Endothelial actin-binding protein) (Filamin-1) (Non-muscle filamin)
Q80X90	Flnb	FLNB_MOUSE	TB_24H-MOCK_24H	0.696349	2.83802e-05	0.000530723	no	0.696349	0.000530723	Filamin-B (FLN-B) (ABP-280-like protein) (Actin-binding-like protein) (Beta-filamin)
O08917	Flot1	FLOT1_MOUSE	TB_24H-MOCK_24H	-0.104676	0.66109	0.847657	no	-0.104676	0.847657	Flotillin-1
Q60634	Flot2	FLOT2_MOUSE	TB_24H-MOCK_24H	-0.897927	8.24424e-06	0.000179289	no	-0.897927	0.000179289	Flotillin-2 (Epidermal surface antigen) (ESA) (Membrane component chromosome 17 surface marker 1 homolog)
B2RXV4	Flvcr1	FLVC1_MOUSE	TB_24H-MOCK_24H	-0.271034	0.407745	0.685656	no	-0.271034	0.685656	Feline leukemia virus subgroup C receptor-related protein 1 (Feline leukemia virus subgroup C receptor) (Major facilitator superfamily domain containing 7B) (Mfsd7b)
Q9JL26	Fmnl1	FMNL1_MOUSE	TB_24H-MOCK_24H	-0.515696	0.00113282	0.0111581	no	-0.515696	0.0111581	Formin-like protein 1 (Formin-related protein)
P97872	Fmo5	FMO5_MOUSE	TB_24H-MOCK_24H	0.138265	0.714642	0.875436	no	0.138265	0.875436	Dimethylaniline monooxygenase [N-oxide-forming] 5 (EC 1.14.13.8) (Dimethylaniline oxidase 5) (Hepatic flavin-containing monooxygenase 5) (FMO 5)
P35922	Fmr1	FMR1_MOUSE	TB_24H-MOCK_24H	0.0838692	0.623679	0.8301	no	0.0838692	0.8301	Synaptic functional regulator FMR1 (Fragile X mental retardation protein 1 homolog) (FMRP) (Protein FMR-1) (mFmr1p)
Q8K274	Fn3krp	KT3K_MOUSE	TB_24H-MOCK_24H	-0.449232	0.0251868	0.120368	no	-0.449232	0.120368	Ketosamine-3-kinase (EC 2.7.1.-) (Fructosamine-3-kinase-related protein)
Q80TY0	Fnbp1	FNBP1_MOUSE	TB_24H-MOCK_24H	-0.100222	0.791762	0.913535	no	-0.100222	0.913535	Formin-binding protein 1 (Formin-binding protein 17)
Q8BX90	Fndc3a	FND3A_MOUSE	TB_24H-MOCK_24H	1.87932	3.8438e-10	2.70534e-08	no	1.87932	2.70534e-08	Fibronectin type-III domain-containing protein 3A
Q6NWW9	Fndc3b	FND3B_MOUSE	TB_24H-MOCK_24H	0.506167	0.277742	0.561969	no	0.506167	0.561969	Fibronectin type III domain-containing protein 3B (Factor for adipocyte differentiation 104) (HCV NS5A-binding protein 37)
Q61239	Fnta	FNTA_MOUSE	TB_24H-MOCK_24H	0.0384906	0.882457	0.949286	no	0.0384906	0.949286	Protein farnesyltransferase/geranylgeranyltransferase type-1 subunit alpha (EC 2.5.1.58) (EC 2.5.1.59) (CAAX farnesyltransferase subunit alpha) (FTase-alpha) (Ras proteins prenyltransferase subunit alpha) (Type I protein geranyl-geranyltransferase subunit alpha) (GGTase-I-alpha)
Q05685	Folr2	FOLR2_MOUSE	TB_24H-MOCK_24H	-2.22778	4.63086e-07	1.43408e-05	no	-2.22778	1.43408e-05	Folate receptor beta (FR-beta) (Folate receptor 2) (Folate-binding protein 2)
P42128	Foxk1	FOXK1_MOUSE	TB_24H-MOCK_24H	0.468065	0.363961	0.652568	no	0.468065	0.652568	Forkhead box protein K1 (Myocyte nuclear factor) (MNF)
P97376	Frg1	FRG1_MOUSE	TB_24H-MOCK_24H	-0.824563	0.00115312	0.0113293	no	-0.824563	0.0113293	Protein FRG1 (FSHD region gene 1 protein)
Q8BIE6	Frmd4a	FRM4A_MOUSE	TB_24H-MOCK_24H	1.02962	0.000132151	0.00190183	no	1.02962	0.00190183	FERM domain-containing protein 4A
Q3UFK8	Frmd8	FRMD8_MOUSE	TB_24H-MOCK_24H	-0.0658066	0.778158	0.907324	no	-0.0658066	0.907324	FERM domain-containing protein 8
P09528	Fth1	FRIH_MOUSE	TB_24H-MOCK_24H	1.40244	6.15296e-05	0.00103558	no	1.40244	0.00103558	Ferritin heavy chain (Ferritin H subunit) (EC 1.16.3.1) [Cleaved into: Ferritin heavy chain, N-terminally processed]
P29391	Ftl1	FRIL1_MOUSE	TB_24H-MOCK_24H	0.191688	0.477453	0.748268	no	0.191688	0.748268	Ferritin light chain 1 (Ferritin L subunit 1)
Q9DBE9	Ftsj3	SPB1_MOUSE	TB_24H-MOCK_24H	-1.23306	0.000508027	0.00573344	no	-1.23306	0.00573344	pre-rRNA processing protein FTSJ3 (EC 2.1.1.-) (2'-O-ribose RNA methyltransferase SPB1 homolog) (Protein ftsJ homolog 3) (Putative rRNA methyltransferase 3)
Q91WJ8	Fubp1	FUBP1_MOUSE	TB_24H-MOCK_24H	-0.68737	0.356047	0.645252	no	-0.68737	0.645252	Far upstream element-binding protein 1 (FBP) (FUSE-binding protein 1)
Q9D6K8	Fundc2	FUND2_MOUSE	TB_24H-MOCK_24H	-0.796287	0.0352089	0.150268	no	-0.796287	0.150268	FUN14 domain-containing protein 2 (Hepatitis C virus core-binding protein 6)
P56959	Fus	FUS_MOUSE	TB_24H-MOCK_24H	-0.772081	0.265053	0.54926	no	-0.772081	0.54926	RNA-binding protein FUS (Protein pigpen)
Q61584	Fxr1	FXR1_MOUSE	TB_24H-MOCK_24H	0.173629	0.430521	0.708265	no	0.173629	0.708265	Fragile X mental retardation syndrome-related protein 1 (mFxr1p)
Q9WVR4	Fxr2	FXR2_MOUSE	TB_24H-MOCK_24H	0.172648	0.532953	0.778986	no	0.172648	0.778986	Fragile X mental retardation syndrome-related protein 2
P97808	Fxyd5	FXYD5_MOUSE	TB_24H-MOCK_24H	-0.378211	0.0781192	0.260914	no	-0.378211	0.260914	FXYD domain-containing ion transport regulator 5 (EF-8) (Ion channel homolog RIC) (Oncoprotein-induced protein 2)
O35601	Fyb	FYB_MOUSE	TB_24H-MOCK_24H	0.0600882	0.780478	0.908059	no	0.0600882	0.908059	FYN-binding protein (Adhesion and degranulation promoting adaptor protein) (ADAP) (FYB-120/130) (p120/p130) (FYN-T-binding protein) (SLAP-130) (SLP-76-associated phosphoprotein)
Q8VDC1	Fyco1	FYCO1_MOUSE	TB_24H-MOCK_24H	0.219217	0.616249	0.825147	no	0.219217	0.825147	FYVE and coiled-coil domain-containing protein 1
P39688	Fyn	FYN_MOUSE	TB_24H-MOCK_24H	0.340197	0.0849438	0.275161	no	0.340197	0.275161	Tyrosine-protein kinase Fyn (EC 2.7.10.2) (Proto-oncogene c-Fyn) (p59-Fyn)
Q91Z49	Fyttd1	UIF_MOUSE	TB_24H-MOCK_24H	-0.620309	0.133035	0.372364	no	-0.620309	0.372364	UAP56-interacting factor (Forty-two-three domain-containing protein 1) (Protein 40-2-3)
P97855	G3bp1	G3BP1_MOUSE	TB_24H-MOCK_24H	-0.567663	9.59965e-05	0.00148049	no	-0.567663	0.00148049	Ras GTPase-activating protein-binding protein 1 (G3BP-1) (EC 3.6.4.12) (EC 3.6.4.13) (ATP-dependent DNA helicase VIII) (GAP SH3 domain-binding protein 1) (HDH-VIII)
P97379	G3bp2	G3BP2_MOUSE	TB_24H-MOCK_24H	0.336629	0.0775264	0.259831	no	0.336629	0.259831	Ras GTPase-activating protein-binding protein 2 (G3BP-2) (GAP SH3 domain-binding protein 2)
Q00612	G6pdx	G6PD1_MOUSE	TB_24H-MOCK_24H	-0.0610881	0.573456	0.802201	no	-0.0610881	0.802201	Glucose-6-phosphate 1-dehydrogenase X (G6PD) (EC 1.1.1.49)
P70699	Gaa	LYAG_MOUSE	TB_24H-MOCK_24H	0.282981	0.344046	0.630956	no	0.282981	0.630956	Lysosomal alpha-glucosidase (EC 3.2.1.20) (Acid maltase)
Q9DCD6	Gabarap	GBRAP_MOUSE	TB_24H-MOCK_24H	0.155603	0.554465	0.790903	no	0.155603	0.790903	Gamma-aminobutyric acid receptor-associated protein (GABA(A) receptor-associated protein)
Q00422	Gabpa	GABPA_MOUSE	TB_24H-MOCK_24H	0.236495	0.542747	0.784238	no	0.236495	0.784238	GA-binding protein alpha chain (GABP subunit alpha)
Q00420	Gabpb1	GABP1_MOUSE	TB_24H-MOCK_24H	0.11538	0.735168	0.884074	no	0.11538	0.884074	GA-binding protein subunit beta-1 (GABP subunit beta-1) (GABPB-1) (GABP subunit beta-2) (GABPB-2)
Q9CR59	Gadd45gip1	G45IP_MOUSE	TB_24H-MOCK_24H	-0.777892	0.00150027	0.0140619	no	-0.777892	0.0140619	Growth arrest and DNA damage-inducible proteins-interacting protein 1 (39S ribosomal protein L59, mitochondrial) (MRP-L59)
Q99KY4	Gak	GAK_MOUSE	TB_24H-MOCK_24H	-0.220868	0.146054	0.393568	no	-0.220868	0.393568	Cyclin-G-associated kinase (EC 2.7.11.1)
Q8R059	Gale	GALE_MOUSE	TB_24H-MOCK_24H	-0.260527	0.574471	0.802201	no	-0.260527	0.802201	UDP-glucose 4-epimerase (EC 5.1.3.2) (Galactowaldenase) (UDP-N-acetylglucosamine 4-epimerase) (UDP-GlcNAc 4-epimerase) (EC 5.1.3.7) (UDP-galactosamine 4-epimerase) (UDP-GalNAc 4-epimerase) (UDP-galactose 4-epimerase)
Q9R0N0	Galk1	GALK1_MOUSE	TB_24H-MOCK_24H	-0.284333	0.0581736	0.213653	no	-0.284333	0.213653	Galactokinase (EC 2.7.1.6) (Galactose kinase)
Q68FH4	Galk2	GALK2_MOUSE	TB_24H-MOCK_24H	-0.2292	0.113327	0.337713	no	-0.2292	0.337713	N-acetylgalactosamine kinase (EC 2.7.1.157) (GalNAc kinase) (Galactokinase 2)
Q8K157	Galm	GALM_MOUSE	TB_24H-MOCK_24H	-0.0672205	0.788785	0.911045	no	-0.0672205	0.911045	Aldose 1-epimerase (EC 5.1.3.3) (Galactose mutarotase)
Q571E4	Galns	GALNS_MOUSE	TB_24H-MOCK_24H	1.63695	0.044568	0.177492	no	1.63695	0.177492	N-acetylgalactosamine-6-sulfatase (EC 3.1.6.4) (Chondroitinsulfatase) (Chondroitinase) (Galactose-6-sulfate sulfatase) (N-acetylgalactosamine-6-sulfate sulfatase) (GalNAc6S sulfatase)
Q6PB93	Galnt2	GALT2_MOUSE	TB_24H-MOCK_24H	-0.00542828	0.98437	0.992839	no	-0.00542828	0.992839	Polypeptide N-acetylgalactosaminyltransferase 2 (EC 2.4.1.41) (Polypeptide GalNAc transferase 2) (GalNAc-T2) (pp-GaNTase 2) (Protein-UDP acetylgalactosaminyltransferase 2) (UDP-GalNAc:polypeptide N-acetylgalactosaminyltransferase 2) [Cleaved into: Polypeptide N-acetylgalactosaminyltransferase 2 soluble form]
Q8C7U7	Galnt6	GALT6_MOUSE	TB_24H-MOCK_24H	0.642529	0.0024829	0.0208037	no	0.642529	0.0208037	Polypeptide N-acetylgalactosaminyltransferase 6 (EC 2.4.1.41) (Polypeptide GalNAc transferase 6) (GalNAc-T6) (pp-GaNTase 6) (Protein-UDP acetylgalactosaminyltransferase 6) (UDP-GalNAc:polypeptide N-acetylgalactosaminyltransferase 6)
Q80VA0	Galnt7	GALT7_MOUSE	TB_24H-MOCK_24H	-0.141499	0.683447	0.857683	no	-0.141499	0.857683	N-acetylgalactosaminyltransferase 7 (EC 2.4.1.-) (Polypeptide GalNAc transferase 7) (GalNAc-T7) (pp-GaNTase 7) (Protein-UDP acetylgalactosaminyltransferase 7) (UDP-GalNAc:polypeptide N-acetylgalactosaminyltransferase 7)
O35969	Gamt	GAMT_MOUSE	TB_24H-MOCK_24H	-0.810517	0.00154248	0.0143532	no	-0.810517	0.0143532	Guanidinoacetate N-methyltransferase (EC 2.1.1.2)
Q8CA72	Gan	GAN_MOUSE	TB_24H-MOCK_24H	-0.590832	0.00274814	0.0227309	no	-0.590832	0.0227309	Gigaxonin
Q8BHN3	Ganab	GANAB_MOUSE	TB_24H-MOCK_24H	-0.0530724	0.765549	0.901369	no	-0.0530724	0.901369	Neutral alpha-glucosidase AB (EC 3.2.1.84) (Alpha-glucosidase 2) (Glucosidase II subunit alpha)
P16858	Gapdh	G3P_MOUSE	TB_24H-MOCK_24H	0.118471	0.182248	0.447074	no	0.118471	0.447074	Glyceraldehyde-3-phosphate dehydrogenase (GAPDH) (EC 1.2.1.12) (Peptidyl-cysteine S-nitrosylase GAPDH) (EC 2.6.99.-)
Q64467	Gapdhs	G3PT_MOUSE	TB_24H-MOCK_24H	0.03345	0.816718	0.923939	no	0.03345	0.923939	Glyceraldehyde-3-phosphate dehydrogenase, testis-specific (EC 1.2.1.12) (Spermatogenic cell-specific glyceraldehyde 3-phosphate dehydrogenase 2) (GAPDH-2) (Spermatogenic glyceraldehyde-3-phosphate dehydrogenase)
Q6PAR5	Gapvd1	GAPD1_MOUSE	TB_24H-MOCK_24H	-0.0142757	0.902902	0.958406	no	-0.0142757	0.958406	GTPase-activating protein and VPS9 domain-containing protein 1 (GAPex-5) (Rab5-activating protein 6)
Q9CZD3	Gars	SYG_MOUSE	TB_24H-MOCK_24H	0.255465	0.656125	0.844087	no	0.255465	0.844087	Glycine--tRNA ligase (EC 3.6.1.17) (EC 6.1.1.14) (Diadenosine tetraphosphate synthetase) (AP-4-A synthetase) (Glycyl-tRNA synthetase) (GlyRS)
Q64737	Gart	PUR2_MOUSE	TB_24H-MOCK_24H	-0.600234	4.55242e-05	0.000797394	no	-0.600234	0.000797394	Trifunctional purine biosynthetic protein adenosine-3 [Includes: Phosphoribosylamine--glycine ligase (EC 6.3.4.13) (Glycinamide ribonucleotide synthetase) (GARS) (Phosphoribosylglycinamide synthetase); Phosphoribosylformylglycinamidine cyclo-ligase (EC 6.3.3.1) (AIR synthase) (AIRS) (Phosphoribosyl-aminoimidazole synthetase); Phosphoribosylglycinamide formyltransferase (EC 2.1.2.2) (5'-phosphorib…
Q61592	Gas6	GAS6_MOUSE	TB_24H-MOCK_24H	-0.691116	0.372915	0.659374	no	-0.691116	0.659374	Growth arrest-specific protein 6 (GAS-6) (AXL receptor tyrosine kinase ligand)
Q60780	Gas7	GAS7_MOUSE	TB_24H-MOCK_24H	0.823295	4.38626e-05	0.000771782	no	0.823295	0.000771782	Growth arrest-specific protein 7 (GAS-7)
Q8CHY6	Gatad2a	P66A_MOUSE	TB_24H-MOCK_24H	0.519552	0.00502097	0.035794	no	0.519552	0.035794	Transcriptional repressor p66 alpha (GATA zinc finger domain-containing protein 2A)
Q8VHR5	Gatad2b	P66B_MOUSE	TB_24H-MOCK_24H	-0.923242	0.000843577	0.00861606	no	-0.923242	0.00861606	Transcriptional repressor p66-beta (GATA zinc finger domain-containing protein 2B) (p66/p68)
Q9D964	Gatm	GATM_MOUSE	TB_24H-MOCK_24H	-0.206972	0.451464	0.728173	no	-0.206972	0.728173	Glycine amidinotransferase, mitochondrial (EC 2.1.4.1) (L-arginine:glycine amidinotransferase) (Transamidinase)
P17439	Gba	GLCM_MOUSE	TB_24H-MOCK_24H	0.470269	0.15195	0.402993	no	0.470269	0.402993	Glucosylceramidase (EC 3.2.1.45) (Acid beta-glucosidase) (Beta-glucocerebrosidase) (D-glucosyl-N-acylsphingosine glucohydrolase)
O55126	Gbas	NIPS2_MOUSE	TB_24H-MOCK_24H	0.121978	0.488479	0.757163	no	0.121978	0.757163	Protein NipSnap homolog 2 (NipSnap2) (Glioblastoma-amplified sequence)
Q9D6Y9	Gbe1	GLGB_MOUSE	TB_24H-MOCK_24H	-0.287527	0.168748	0.425225	no	-0.287527	0.425225	1,4-alpha-glucan-branching enzyme (EC 2.4.1.18) (Brancher enzyme) (Glycogen-branching enzyme)
Q9Z0E6	Gbp2	GBP2_MOUSE	TB_24H-MOCK_24H	5.15566	0	0	no	5.15566	0	Guanylate-binding protein 1 (EC 3.6.5.-) (GTP-binding protein 2) (GBP-2) (mGBP-2) (mGBP2) (Guanine nucleotide-binding protein 2) (Interferon-induced guanylate-binding protein 2)
Q61107	Gbp4	GBP4_MOUSE	TB_24H-MOCK_24H	4.73026	0	0	no	4.73026	0	Guanylate-binding protein 4 (EC 3.6.5.-) (GTP-binding protein 3) (GBP-3) (GTP-binding protein 4) (GBP-4) (Guanine nucleotide-binding protein 4) (Guanylate-binding protein 3)
Q8CFB4	Gbp5	GBP5_MOUSE	TB_24H-MOCK_24H	4.5821	0	0	no	4.5821	0	Guanylate-binding protein 5 (EC 3.6.5.-) (GTP-binding protein 5) (GBP-5) (MuGBP-5) (Guanine nucleotide-binding protein 5)
O88986	Gcat	KBL_MOUSE	TB_24H-MOCK_24H	0.521132	0.0249129	0.11965	no	0.521132	0.11965	2-amino-3-ketobutyrate coenzyme A ligase, mitochondrial (AKB ligase) (EC 2.3.1.29) (Aminoacetone synthase) (Glycine acetyltransferase)
Q9D4H2	Gcc1	GCC1_MOUSE	TB_24H-MOCK_24H	0.162074	0.497578	0.762587	no	0.162074	0.762587	GRIP and coiled-coil domain-containing protein 1 (Golgi coiled-coil protein 1)
Q8CHG3	Gcc2	GCC2_MOUSE	TB_24H-MOCK_24H	-0.546699	0.0283002	0.130602	no	-0.546699	0.130602	GRIP and coiled-coil domain-containing protein 2 (185 kDa Golgi coiled-coil protein) (GCC185)
Q60759	Gcdh	GCDH_MOUSE	TB_24H-MOCK_24H	-0.164222	0.522529	0.773799	no	-0.164222	0.773799	Glutaryl-CoA dehydrogenase, mitochondrial (GCD) (EC 1.3.8.6)
Q05915	Gch1	GCH1_MOUSE	TB_24H-MOCK_24H	2.82389	1.80877e-05	0.000355419	no	2.82389	0.000355419	GTP cyclohydrolase 1 (EC 3.5.4.16) (GTP cyclohydrolase I) (GTP-CH-I)
P97494	Gclc	GSH1_MOUSE	TB_24H-MOCK_24H	-0.026253	0.877074	0.947309	no	-0.026253	0.947309	Glutamate--cysteine ligase catalytic subunit (EC 6.3.2.2) (GCS heavy chain) (Gamma-ECS) (Gamma-glutamylcysteine synthetase)
O09172	Gclm	GSH0_MOUSE	TB_24H-MOCK_24H	0.117163	0.651885	0.842272	no	0.117163	0.842272	Glutamate--cysteine ligase regulatory subunit (GCS light chain) (Gamma-ECS regulatory subunit) (Gamma-glutamylcysteine synthetase regulatory subunit) (Glutamate--cysteine ligase modifier subunit)
E9PVA8	Gcn1	GCN1_MOUSE	TB_24H-MOCK_24H	-0.456596	0.00850202	0.0541305	no	-0.456596	0.0541305	eIF-2-alpha kinase activator GCN1 (GCN1 eIF-2-alpha kinase activator homolog) (GCN1-like protein 1) (General control of amino-acid synthesis 1-like protein 1) (Translational activator GCN1)
Q9R111	Gda	GUAD_MOUSE	TB_24H-MOCK_24H	1.64127	0.000233514	0.00309566	no	1.64127	0.00309566	Guanine deaminase (Guanase) (Guanine aminase) (EC 3.5.4.3) (Guanine aminohydrolase) (GAH)
Q9JL56	Gde1	GDE1_MOUSE	TB_24H-MOCK_24H	1.15608	3.16919e-06	7.91479e-05	no	1.15608	7.91479e-05	Glycerophosphodiester phosphodiesterase 1 (EC 3.1.4.44) (Membrane-interacting protein of RGS16)
P50396	Gdi1	GDIA_MOUSE	TB_24H-MOCK_24H	0.272479	0.0557801	0.206824	no	0.272479	0.206824	Rab GDP dissociation inhibitor alpha (Rab GDI alpha) (Guanosine diphosphate dissociation inhibitor 1) (GDI-1)
Q61598	Gdi2	GDIB_MOUSE	TB_24H-MOCK_24H	-0.140593	0.11812	0.346922	no	-0.140593	0.346922	Rab GDP dissociation inhibitor beta (Rab GDI beta) (GDI-3) (Guanosine diphosphate dissociation inhibitor 2) (GDI-2)
Q9CRY7	Gdpd1	GDPD1_MOUSE	TB_24H-MOCK_24H	0.276607	0.448282	0.726371	no	0.276607	0.726371	Glycerophosphodiester phosphodiesterase domain-containing protein 1 (EC 3.1.-.-) (Glycerophosphodiester phosphodiesterase 4)
Q8BX17	Gemin5	GEMI5_MOUSE	TB_24H-MOCK_24H	-0.291123	0.400224	0.679997	no	-0.291123	0.679997	Gem-associated protein 5 (Gemin5)
Q9D1H7	Get4	GET4_MOUSE	TB_24H-MOCK_24H	-0.155639	0.52462	0.77482	no	-0.155639	0.77482	Golgi to ER traffic protein 4 homolog
Q8K0D5	Gfm1	EFGM_MOUSE	TB_24H-MOCK_24H	-0.361063	0.239602	0.520191	no	-0.361063	0.520191	Elongation factor G, mitochondrial (EF-Gmt) (Elongation factor G 1, mitochondrial) (mEF-G 1) (Elongation factor G1)
Q8R2Q4	Gfm2	RRF2M_MOUSE	TB_24H-MOCK_24H	-0.100461	0.657443	0.844246	no	-0.100461	0.844246	Ribosome-releasing factor 2, mitochondrial (RRF2mt) (Elongation factor G 2, mitochondrial) (EF-G2mt) (mEF-G 2)
P47856	Gfpt1	GFPT1_MOUSE	TB_24H-MOCK_24H	-0.190814	0.531634	0.778938	no	-0.190814	0.778938	Glutamine--fructose-6-phosphate aminotransferase [isomerizing] 1 (EC 2.6.1.16) (D-fructose-6-phosphate amidotransferase 1) (Glutamine:fructose-6-phosphate amidotransferase 1) (GFAT 1) (GFAT1) (Hexosephosphate aminotransferase 1)
Q8R0H9	Gga1	GGA1_MOUSE	TB_24H-MOCK_24H	0.0353333	0.730931	0.882332	no	0.0353333	0.882332	ADP-ribosylation factor-binding protein GGA1 (Gamma-adaptin-related protein 1) (Golgi-localized, gamma ear-containing, ARF-binding protein 1)
Q6P5E6	Gga2	GGA2_MOUSE	TB_24H-MOCK_24H	-0.739612	0.00911596	0.0568243	no	-0.739612	0.0568243	ADP-ribosylation factor-binding protein GGA2 (Gamma-adaptin-related protein 2) (Golgi-localized, gamma ear-containing, ARF-binding protein 2)
Q8BMI3	Gga3	GGA3_MOUSE	TB_24H-MOCK_24H	-0.39263	0.0964592	0.299205	no	-0.39263	0.299205	ADP-ribosylation factor-binding protein GGA3 (Golgi-localized, gamma ear-containing, ARF-binding protein 3)
Q9QYC7	Ggcx	VKGC_MOUSE	TB_24H-MOCK_24H	-0.579983	0.165225	0.420227	no	-0.579983	0.420227	Vitamin K-dependent gamma-carboxylase (EC 4.1.1.90) (Gamma-glutamyl carboxylase) (Peptidyl-glutamate 4-carboxylase) (Vitamin K gamma glutamyl carboxylase)
Q9Z0L8	Ggh	GGH_MOUSE	TB_24H-MOCK_24H	0.113571	0.887472	0.951495	no	0.113571	0.951495	Gamma-glutamyl hydrolase (EC 3.4.19.9) (Conjugase) (FGPH) (Folylpolyglutamate hydrolase) (GH) (Gamma-Glu-x carboxypeptidase)
Q91VC9	Ghitm	GHITM_MOUSE	TB_24H-MOCK_24H	0.848454	0.0124299	0.0722466	no	0.848454	0.0722466	Growth hormone-inducible transmembrane protein (Mitochondrial morphology and cristae structure 1) (MICS1)
Q9D7M1	Gid8	GID8_MOUSE	TB_24H-MOCK_24H	-0.104136	0.770627	0.904352	no	-0.104136	0.904352	Glucose-induced degradation protein 8 homolog (Two hybrid-associated protein 1 with RanBPM) (Twa1)
Q6Y7W8	Gigyf2	PERQ2_MOUSE	TB_24H-MOCK_24H	-0.174246	0.614406	0.825088	no	-0.174246	0.825088	PERQ amino acid-rich with GYF domain-containing protein 2 (GRB10-interacting GYF protein 2) (Trinucleotide repeat-containing gene 15 protein)
Q9Z0G0	Gipc1	GIPC1_MOUSE	TB_24H-MOCK_24H	-0.253272	0.223403	0.497866	no	-0.253272	0.497866	PDZ domain-containing protein GIPC1 (GAIP C-terminus-interacting protein) (RGS-GAIP-interacting protein) (RGS19-interacting protein 1) (SemaF cytoplasmic domain-associated protein 1) (SEMCAP-1) (Synectin)
Q68FF6	Git1	GIT1_MOUSE	TB_24H-MOCK_24H	-0.210841	0.264282	0.547957	no	-0.210841	0.547957	ARF GTPase-activating protein GIT1 (ARF GAP GIT1) (G protein-coupled receptor kinase-interactor 1) (GRK-interacting protein 1)
Q9JLQ2	Git2	GIT2_MOUSE	TB_24H-MOCK_24H	-0.172959	0.142726	0.388806	no	-0.172959	0.388806	ARF GTPase-activating protein GIT2 (ARF GAP GIT2) (Cool-interacting tyrosine-phosphorylated protein 2) (CAT-2) (CAT2) (G protein-coupled receptor kinase-interactor 2) (GRK-interacting protein 2)
Q64516	Gk	GLPK_MOUSE	TB_24H-MOCK_24H	1.72477	3.45806e-06	8.58086e-05	no	1.72477	8.58086e-05	Glycerol kinase (GK) (Glycerokinase) (EC 2.7.1.30) (ATP:glycerol 3-phosphotransferase)
P51569	Gla	AGAL_MOUSE	TB_24H-MOCK_24H	0.423341	0.00370536	0.0283467	no	0.423341	0.0283467	Alpha-galactosidase A (EC 3.2.1.22) (Alpha-D-galactosidase A) (Alpha-D-galactoside galactohydrolase) (Melibiase)
P23780	Glb1	BGAL_MOUSE	TB_24H-MOCK_24H	0.540508	0.0837432	0.27287	no	0.540508	0.27287	Beta-galactosidase (EC 3.2.1.23) (Acid beta-galactosidase) (Lactase)
Q61543	Glg1	GSLG1_MOUSE	TB_24H-MOCK_24H	-1.24794	4.1552e-07	1.30771e-05	no	-1.24794	1.30771e-05	Golgi apparatus protein 1 (E-selectin ligand 1) (ESL-1) (Selel) (Golgi sialoglycoprotein MG-160)
Q9CYL5	Glipr2	GAPR1_MOUSE	TB_24H-MOCK_24H	2.37762	5.55112e-15	1.06419e-12	no	2.37762	1.06419e-12	Golgi-associated plant pathogenesis-related protein 1 (GAPR-1) (Golgi-associated PR-1 protein) (Glioma pathogenesis-related protein 2) (GliPR 2)
Q8BZM1	Glmn	GLMN_MOUSE	TB_24H-MOCK_24H	-0.454118	0.0604713	0.21877	no	-0.454118	0.21877	Glomulin (FK506-binding protein-associated protein) (FAP) (FKBP-associated protein)
Q9JHJ3	Glmp	GLMP_MOUSE	TB_24H-MOCK_24H	-0.181468	0.421772	0.702209	no	-0.181468	0.702209	Glycosylated lysosomal membrane protein (Lysosomal protein NCU-G1)
Q9CPV4	Glod4	GLOD4_MOUSE	TB_24H-MOCK_24H	-0.227625	0.268716	0.552711	no	-0.227625	0.552711	Glyoxalase domain-containing protein 4
Q9QUH0	Glrx	GLRX1_MOUSE	TB_24H-MOCK_24H	0.898081	0.000124234	0.00180793	no	0.898081	0.00180793	Glutaredoxin-1 (Thioltransferase-1) (TTase-1)
Q9CQM9	Glrx3	GLRX3_MOUSE	TB_24H-MOCK_24H	-0.339205	0.0247401	0.119058	no	-0.339205	0.119058	Glutaredoxin-3 (PKC-interacting cousin of thioredoxin) (PICOT) (PKC-theta-interacting protein) (PKCq-interacting protein) (Thioredoxin-like protein 2)
Q80Y14	Glrx5	GLRX5_MOUSE	TB_24H-MOCK_24H	-0.643882	0.0597651	0.217639	no	-0.643882	0.217639	Glutaredoxin-related protein 5, mitochondrial (Monothiol glutaredoxin-5)
D3Z7P3	Gls	GLSK_MOUSE	TB_24H-MOCK_24H	-0.184426	0.349621	0.637547	no	-0.184426	0.637547	Glutaminase kidney isoform, mitochondrial (GLS) (EC 3.5.1.2)
Q9JL62	Gltp	GLTP_MOUSE	TB_24H-MOCK_24H	-0.236118	0.455851	0.732262	no	-0.236118	0.732262	Glycolipid transfer protein (GLTP)
P26443	Glud1	DHE3_MOUSE	TB_24H-MOCK_24H	0.00430976	0.942164	0.977296	no	0.00430976	0.977296	Glutamate dehydrogenase 1, mitochondrial (GDH 1) (EC 1.4.1.3)
P15105	Glul	GLNA_MOUSE	TB_24H-MOCK_24H	0.225676	0.425273	0.704421	no	0.225676	0.704421	Glutamine synthetase (GS) (EC 6.3.1.2) (Glutamate decarboxylase) (EC 4.1.1.15) (Glutamate--ammonia ligase)
Q922P9	Glyr1	GLYR1_MOUSE	TB_24H-MOCK_24H	0.369695	0.0872652	0.278946	no	0.369695	0.278946	Putative oxidoreductase GLYR1 (EC 1.-.-.-) (Glyoxylate reductase 1 homolog) (Nuclear protein NP60)
Q60648	Gm2a	SAP3_MOUSE	TB_24H-MOCK_24H	0.312688	0.31223	0.59893	no	0.312688	0.59893	Ganglioside GM2 activator (Cerebroside sulfate activator protein) (GM2-AP) (Sphingolipid activator protein 3) (SAP-3)
Q8K0C9	Gmds	GMDS_MOUSE	TB_24H-MOCK_24H	-0.30835	0.0456843	0.18107	no	-0.30835	0.18107	GDP-mannose 4,6 dehydratase (EC 4.2.1.47) (GDP-D-mannose dehydratase) (GMD)
Q9CQI3	Gmfb	GMFB_MOUSE	TB_24H-MOCK_24H	-0.176559	0.176716	0.438506	no	-0.176559	0.438506	Glia maturation factor beta (GMF-beta)
Q9ERL7	Gmfg	GMFG_MOUSE	TB_24H-MOCK_24H	0.0663995	0.690432	0.862448	no	0.0663995	0.862448	Glia maturation factor gamma (GMF-gamma)
Q6PGG2	Gmip	GMIP_MOUSE	TB_24H-MOCK_24H	-0.435796	0.00144403	0.0136338	no	-0.435796	0.0136338	GEM-interacting protein (GMIP)
Q922H4	Gmppa	GMPPA_MOUSE	TB_24H-MOCK_24H	-0.0374737	0.655676	0.843791	no	-0.0374737	0.843791	Mannose-1-phosphate guanyltransferase alpha (GDP-mannose pyrophosphorylase A) (GTP-mannose-1-phosphate guanylyltransferase alpha)
Q8BTZ7	Gmppb	GMPPB_MOUSE	TB_24H-MOCK_24H	0.522855	0.00291087	0.0238728	no	0.522855	0.0238728	Mannose-1-phosphate guanyltransferase beta (EC 2.7.7.13) (GDP-mannose pyrophosphorylase B) (GTP-mannose-1-phosphate guanylyltransferase beta)
Q99L27	Gmpr2	GMPR2_MOUSE	TB_24H-MOCK_24H	-0.289931	0.604691	0.818161	no	-0.289931	0.818161	GMP reductase 2 (GMPR 2) (EC 1.7.1.7) (Guanosine 5'-monophosphate oxidoreductase 2) (Guanosine monophosphate reductase 2)
Q3THK7	Gmps	GUAA_MOUSE	TB_24H-MOCK_24H	-0.296994	0.0263293	0.124142	no	-0.296994	0.124142	GMP synthase [glutamine-hydrolyzing] (EC 6.3.5.2) (GMP synthetase) (Glutamine amidotransferase)
P27600	Gna12	GNA12_MOUSE	TB_24H-MOCK_24H	-0.862986	0.0265031	0.124789	no	-0.862986	0.124789	Guanine nucleotide-binding protein subunit alpha-12 (G alpha-12) (G-protein subunit alpha-12)
P27601	Gna13	GNA13_MOUSE	TB_24H-MOCK_24H	0.524781	0.00293185	0.0239435	no	0.524781	0.0239435	Guanine nucleotide-binding protein subunit alpha-13 (G alpha-13) (G-protein subunit alpha-13)
P30677	Gna14	GNA14_MOUSE	TB_24H-MOCK_24H	-0.202242	0.520567	0.773428	no	-0.202242	0.773428	Guanine nucleotide-binding protein subunit alpha-14 (G alpha-14) (G-protein subunit alpha-14)
P08752	Gnai2	GNAI2_MOUSE	TB_24H-MOCK_24H	-0.0944637	0.28582	0.568339	no	-0.0944637	0.568339	Guanine nucleotide-binding protein G(i) subunit alpha-2 (Adenylate cyclase-inhibiting G alpha protein)
Q9DC51	Gnai3	GNAI3_MOUSE	TB_24H-MOCK_24H	0.051055	0.738091	0.885939	no	0.051055	0.885939	Guanine nucleotide-binding protein G(k) subunit alpha (G(i) alpha-3)
P21279	Gnaq	GNAQ_MOUSE	TB_24H-MOCK_24H	-0.264103	0.146056	0.393568	no	-0.264103	0.393568	Guanine nucleotide-binding protein G(q) subunit alpha (Guanine nucleotide-binding protein alpha-q)
P63094	Gnas	GNAS2_MOUSE	TB_24H-MOCK_24H	0.203824	0.541787	0.783789	no	0.203824	0.783789	Guanine nucleotide-binding protein G(s) subunit alpha isoforms short (Adenylate cyclase-stimulating G alpha protein)
P62874	Gnb1	GBB1_MOUSE	TB_24H-MOCK_24H	-0.10005	0.393333	0.674609	no	-0.10005	0.674609	Guanine nucleotide-binding protein G(I)/G(S)/G(T) subunit beta-1 (Transducin beta chain 1)
P62880	Gnb2	GBB2_MOUSE	TB_24H-MOCK_24H	0.00395635	0.96842	0.988856	no	0.00395635	0.988856	Guanine nucleotide-binding protein G(I)/G(S)/G(T) subunit beta-2 (G protein subunit beta-2) (Transducin beta chain 2)
P29387	Gnb4	GBB4_MOUSE	TB_24H-MOCK_24H	0.930931	0.0132269	0.0745288	no	0.930931	0.0745288	Guanine nucleotide-binding protein subunit beta-4 (Transducin beta chain 4)
Q9DAS9	Gng12	GBG12_MOUSE	TB_24H-MOCK_24H	-0.0467964	0.787491	0.910287	no	-0.0467964	0.910287	Guanine nucleotide-binding protein G(I)/G(S)/G(O) subunit gamma-12
P63213	Gng2	GBG2_MOUSE	TB_24H-MOCK_24H	-0.512027	0.0618655	0.222191	no	-0.512027	0.222191	Guanine nucleotide-binding protein G(I)/G(S)/G(O) subunit gamma-2 (G gamma-I)
Q80SZ7	Gng5	GBG5_MOUSE	TB_24H-MOCK_24H	-0.674132	0.0871383	0.278771	no	-0.674132	0.278771	Guanine nucleotide-binding protein G(I)/G(S)/G(O) subunit gamma-5
Q99LH1	Gnl2	NOG2_MOUSE	TB_24H-MOCK_24H	-0.701664	0.00643978	0.0436574	no	-0.701664	0.0436574	Nucleolar GTP-binding protein 2
Q8CI11	Gnl3	GNL3_MOUSE	TB_24H-MOCK_24H	-0.677693	0.0817338	0.268128	no	-0.677693	0.268128	Guanine nucleotide-binding protein-like 3 (Nucleolar GTP-binding protein 3) (Nucleostemin)
O88958	Gnpda1	GNPI1_MOUSE	TB_24H-MOCK_24H	-0.0686181	0.709207	0.8732	no	-0.0686181	0.8732	Glucosamine-6-phosphate isomerase 1 (EC 3.5.99.6) (Glucosamine-6-phosphate deaminase 1) (GNPDA 1) (GlcN6P deaminase 1) (Oscillin)
Q9CRC9	Gnpda2	GNPI2_MOUSE	TB_24H-MOCK_24H	-0.203166	0.792366	0.91396	no	-0.203166	0.91396	Glucosamine-6-phosphate isomerase 2 (EC 3.5.99.6) (Glucosamine-6-phosphate deaminase 2) (GNPDA 2) (GlcN6P deaminase 2)
Q6S5C2	Gnptg	GNPTG_MOUSE	TB_24H-MOCK_24H	#NUM!		0	yes	-3.55884	0.0392321	N-acetylglucosamine-1-phosphotransferase subunit gamma (GlcNAc-1-phosphotransferase subunit gamma) (M6PR domain-containing protein 1) (UDP-N-acetylglucosamine-1-phosphotransferase subunit gamma)
Q8BFR4	Gns	GNS_MOUSE	TB_24H-MOCK_24H	0.289765	0.413602	0.693097	no	0.289765	0.693097	N-acetylglucosamine-6-sulfatase (EC 3.1.6.14) (Glucosamine-6-sulfatase) (G6S)
Q921M4	Golga2	GOGA2_MOUSE	TB_24H-MOCK_24H	0.422493	0.0136348	0.0761618	no	0.422493	0.0761618	Golgin subfamily A member 2 (130 kDa cis-Golgi matrix protein) (GM130)
P55937	Golga3	GOGA3_MOUSE	TB_24H-MOCK_24H	0.509271	0.00325121	0.0258959	no	0.509271	0.0258959	Golgin subfamily A member 3 (Golgin-160) (Male-enhanced antigen 2) (MEA-2)
Q91VW5	Golga4	GOGA4_MOUSE	TB_24H-MOCK_24H	-0.059507	0.825404	0.927676	no	-0.059507	0.927676	Golgin subfamily A member 4 (tGolgin-1)
Q9QYE6	Golga5	GOGA5_MOUSE	TB_24H-MOCK_24H	0.0927663	0.547867	0.786936	no	0.0927663	0.786936	Golgin subfamily A member 5 (Golgin-84) (Protein Ret-II) (Protein Sumiko)
Q9CRA5	Golph3	GOLP3_MOUSE	TB_24H-MOCK_24H	0.212575	0.529802	0.777136	no	0.212575	0.777136	Golgi phosphoprotein 3 (Coat protein GPP34)
Q8R088	Golph3l	GLP3L_MOUSE	TB_24H-MOCK_24H	-0.030924	0.940727	0.976607	no	-0.030924	0.976607	Golgi phosphoprotein 3-like
Q9CR60	Golt1b	GOT1B_MOUSE	TB_24H-MOCK_24H	-0.304317	0.278657	0.562207	no	-0.304317	0.562207	Vesicle transport protein GOT1B (Golgi transport 1 homolog B)
Q8BH60	Gopc	GOPC_MOUSE	TB_24H-MOCK_24H	0.328263	0.528641	0.777063	no	0.328263	0.777063	Golgi-associated PDZ and coiled-coil motif-containing protein (PDZ protein interacting specifically with TC10) (PIST)
Q91X51	Gorasp1	GORS1_MOUSE	TB_24H-MOCK_24H	-0.240179	0.450853	0.727898	no	-0.240179	0.727898	Golgi reassembly-stacking protein 1 (Golgi peripheral membrane protein p65) (Golgi reassembly-stacking protein of 65 kDa) (GRASP65)
Q99JX3	Gorasp2	GORS2_MOUSE	TB_24H-MOCK_24H	-0.263459	0.382434	0.666848	no	-0.263459	0.666848	Golgi reassembly-stacking protein 2 (GRS2) (Golgi reassembly-stacking protein of 55 kDa) (GRASP55)
O88630	Gosr1	GOSR1_MOUSE	TB_24H-MOCK_24H	-0.161195	0.498117	0.763043	no	-0.161195	0.763043	Golgi SNAP receptor complex member 1 (28 kDa Golgi SNARE protein) (28 kDa cis-Golgi SNARE p28) (GOS-28)
O35166	Gosr2	GOSR2_MOUSE	TB_24H-MOCK_24H	-0.00484191	0.9863	0.994521	no	-0.00484191	0.994521	Golgi SNAP receptor complex member 2 (27 kDa Golgi SNARE protein) (Membrin)
P05201	Got1	AATC_MOUSE	TB_24H-MOCK_24H	0.0359342	0.765284	0.901369	no	0.0359342	0.901369	Aspartate aminotransferase, cytoplasmic (cAspAT) (EC 2.6.1.1) (EC 2.6.1.3) (Cysteine aminotransferase, cytoplasmic) (Cysteine transaminase, cytoplasmic) (cCAT) (Glutamate oxaloacetate transaminase 1) (Transaminase A)
P05202	Got2	AATM_MOUSE	TB_24H-MOCK_24H	0.00318423	0.978535	0.992839	no	0.00318423	0.992839	Aspartate aminotransferase, mitochondrial (mAspAT) (EC 2.6.1.1) (EC 2.6.1.7) (Fatty acid-binding protein) (FABP-1) (Glutamate oxaloacetate transaminase 2) (Kynurenine aminotransferase 4) (Kynurenine aminotransferase IV) (Kynurenine--oxoglutarate transaminase 4) (Kynurenine--oxoglutarate transaminase IV) (Plasma membrane-associated fatty acid-binding protein) (FABPpm) (Transaminase A)
A2A6A1	Gpatch8	GPTC8_MOUSE	TB_24H-MOCK_24H	-0.58886	0.261721	0.544981	no	-0.58886	0.544981	G patch domain-containing protein 8
Q3ULJ0	Gpd1l	GPD1L_MOUSE	TB_24H-MOCK_24H	-0.243191	0.133245	0.372682	no	-0.243191	0.372682	Glycerol-3-phosphate dehydrogenase 1-like protein (EC 1.1.1.8)
Q64521	Gpd2	GPDM_MOUSE	TB_24H-MOCK_24H	0.819598	5.21885e-08	2.10439e-06	no	0.819598	2.10439e-06	Glycerol-3-phosphate dehydrogenase, mitochondrial (GPD-M) (GPDH-M) (EC 1.1.5.3) (Protein TISP38)
Q8BUV3	Gphn	GEPH_MOUSE	TB_24H-MOCK_24H	-0.394576	0.0390124	0.161539	no	-0.394576	0.161539	Gephyrin [Includes: Molybdopterin adenylyltransferase (MPT adenylyltransferase) (EC 2.7.7.75) (Domain G); Molybdopterin molybdenumtransferase (MPT Mo-transferase) (EC 2.10.1.1) (Domain E)]
P06745	Gpi	G6PI_MOUSE	TB_24H-MOCK_24H	-0.11541	0.0991892	0.305702	no	-0.11541	0.305702	Glucose-6-phosphate isomerase (GPI) (EC 5.3.1.9) (Autocrine motility factor) (AMF) (Neuroleukin) (NLK) (Phosphoglucose isomerase) (PGI) (Phosphohexose isomerase) (PHI)
Q56A08	Gpkow	GPKOW_MOUSE	TB_24H-MOCK_24H	-0.567289	0.252971	0.534828	no	-0.567289	0.534828	G patch domain and KOW motifs-containing protein (Protein MOS2 homolog)
Q99P91	Gpnmb	GPNMB_MOUSE	TB_24H-MOCK_24H	0.402262	0.0283404	0.130602	no	0.402262	0.130602	Transmembrane glycoprotein NMB (DC-HIL) (Dendritic cell-associated transmembrane protein) (Osteoactivin)
Q8CIM5	Gpr84	GPR84_MOUSE	TB_24H-MOCK_24H	2.56037	5.64648e-07	1.69037e-05	no	2.56037	1.69037e-05	G-protein coupled receptor 84
Q99LD4	Gps1	CSN1_MOUSE	TB_24H-MOCK_24H	-0.35068	0.0995526	0.306334	no	-0.35068	0.306334	COP9 signalosome complex subunit 1 (SGN1) (Signalosome subunit 1) (G protein pathway suppressor 1) (GPS-1) (JAB1-containing signalosome subunit 1)
Q3U1Z5	Gpsm3	GPSM3_MOUSE	TB_24H-MOCK_24H	-0.0671223	0.779721	0.907813	no	-0.0671223	0.907813	G-protein-signaling modulator 3
P11352	Gpx1	GPX1_MOUSE	TB_24H-MOCK_24H	-0.0174581	0.916664	0.96529	no	-0.0174581	0.96529	Glutathione peroxidase 1 (GPx-1) (GSHPx-1) (EC 1.11.1.9) (Cellular glutathione peroxidase) (Selenium-dependent glutathione peroxidase 1)
O70325	Gpx4	GPX41_MOUSE	TB_24H-MOCK_24H	-0.402786	0.0819259	0.268531	no	-0.402786	0.268531	Phospholipid hydroperoxide glutathione peroxidase, mitochondrial (PHGPx) (EC 1.11.1.12) (Glutathione peroxidase 4) (GPx-4) (GSHPx-4)
Q80TI0	Gramd1b	GRM1B_MOUSE	TB_24H-MOCK_24H	-0.0901342	0.668576	0.849871	no	-0.0901342	0.849871	GRAM domain-containing protein 1B
Q60631	Grb2	GRB2_MOUSE	TB_24H-MOCK_24H	0.300359	0.564557	0.796719	no	0.300359	0.796719	Growth factor receptor-bound protein 2 (Adapter protein GRB2) (SH2/SH3 adapter GRB2)
O35127	Grcc10	C10_MOUSE	TB_24H-MOCK_24H	-0.46394	0.163737	0.418368	no	-0.46394	0.418368	Protein C10
Q91Z53	Grhpr	GRHPR_MOUSE	TB_24H-MOCK_24H	-0.186723	0.377226	0.663154	no	-0.186723	0.663154	Glyoxylate reductase/hydroxypyruvate reductase (EC 1.1.1.79) (EC 1.1.1.81)
Q8VD04	Gripap1	GRAP1_MOUSE	TB_24H-MOCK_24H	0.145041	0.528084	0.776676	no	0.145041	0.776676	GRIP1-associated protein 1 (GRASP-1) (HCMV-interacting protein)
Q99MK8	Grk2	ARBK1_MOUSE	TB_24H-MOCK_24H	-0.102248	0.368667	0.657049	no	-0.102248	0.657049	Beta-adrenergic receptor kinase 1 (Beta-ARK-1) (EC 2.7.11.15) (G-protein-coupled receptor kinase 2)
P28798	Grn	GRN_MOUSE	TB_24H-MOCK_24H	-0.17602	0.24221	0.523301	no	-0.17602	0.523301	Granulins (PC cell-derived growth factor) (PCDGF) (Proepithelin) (PEPI) [Cleaved into: Acrogranin (Progranulin); Granulin-1; Granulin-2; Granulin-3; Granulin-4; Granulin-5; Granulin-6; Granulin-7]
Q99LP6	Grpel1	GRPE1_MOUSE	TB_24H-MOCK_24H	-0.169235	0.339203	0.626163	no	-0.169235	0.626163	GrpE protein homolog 1, mitochondrial (Mt-GrpE#1)
Q810D6	Grwd1	GRWD1_MOUSE	TB_24H-MOCK_24H	-1.13902	0.00181763	0.0164778	no	-1.13902	0.0164778	Glutamate-rich WD repeat-containing protein 1 (Protein A301)
Q9D8T2	Gsdmdc1	GSDMD_MOUSE	TB_24H-MOCK_24H	0.84462	1.27887e-07	4.58379e-06	no	0.84462	4.58379e-06	Gasdermin-D (Gasdermin domain-containing protein 1) [Cleaved into: Gasdermin-D, N-terminal (GSDMD-NT); Gasdermin-D, C-terminal (GSDMD-CT)]
Q2NL51	Gsk3a	GSK3A_MOUSE	TB_24H-MOCK_24H	0.0615683	0.822518	0.926477	no	0.0615683	0.926477	Glycogen synthase kinase-3 alpha (GSK-3 alpha) (EC 2.7.11.26) (Serine/threonine-protein kinase GSK3A) (EC 2.7.11.1)
Q9WV60	Gsk3b	GSK3B_MOUSE	TB_24H-MOCK_24H	0.417516	0.193673	0.461421	no	0.417516	0.461421	Glycogen synthase kinase-3 beta (GSK-3 beta) (EC 2.7.11.26) (Serine/threonine-protein kinase GSK3B) (EC 2.7.11.1)
P13020	Gsn	GELS_MOUSE	TB_24H-MOCK_24H	-0.267471	0.0820404	0.268679	no	-0.267471	0.268679	Gelsolin (Actin-depolymerizing factor) (ADF) (Brevin)
Q8R050	Gspt1	ERF3A_MOUSE	TB_24H-MOCK_24H	-0.136293	0.747524	0.891166	no	-0.136293	0.891166	Eukaryotic peptide chain release factor GTP-binding subunit ERF3A (Eukaryotic peptide chain release factor subunit 3a) (eRF3a) (G1 to S phase transition protein 1 homolog)
P47791	Gsr	GSHR_MOUSE	TB_24H-MOCK_24H	0.291207	0.12653	0.359951	no	0.291207	0.359951	Glutathione reductase, mitochondrial (GR) (GRase) (EC 1.8.1.7)
P51855	Gss	GSHB_MOUSE	TB_24H-MOCK_24H	-0.297251	0.217899	0.487847	no	-0.297251	0.487847	Glutathione synthetase (GSH synthetase) (GSH-S) (EC 6.3.2.3) (Glutathione synthase)
P10649	Gstm1	GSTM1_MOUSE	TB_24H-MOCK_24H	0.214357	0.245091	0.526699	no	0.214357	0.526699	Glutathione S-transferase Mu 1 (EC 2.5.1.18) (GST 1-1) (GST class-mu 1) (Glutathione S-transferase GT8.7) (pmGT10)
O09131	Gsto1	GSTO1_MOUSE	TB_24H-MOCK_24H	-0.299394	0.00513789	0.0362516	no	-0.299394	0.0362516	Glutathione S-transferase omega-1 (GSTO-1) (EC 2.5.1.18) (Glutathione S-transferase omega 1-1) (GSTO 1-1) (Glutathione-dependent dehydroascorbate reductase) (EC 1.8.5.1) (Monomethylarsonic acid reductase) (MMA(V) reductase) (EC 1.20.4.2) (S-(Phenacyl)glutathione reductase) (SPG-R) (p28)
P19157	Gstp1	GSTP1_MOUSE	TB_24H-MOCK_24H	0.104946	0.744295	0.889634	no	0.104946	0.889634	Glutathione S-transferase P 1 (Gst P1) (EC 2.5.1.18) (GST YF-YF) (GST class-pi) (GST-piB) (Preadipocyte growth factor)
Q99L20	Gstt3	GSTT3_MOUSE	TB_24H-MOCK_24H	-0.406706	0.0459653	0.181563	no	-0.406706	0.181563	Glutathione S-transferase theta-3 (EC 2.5.1.18)
Q99PM3	Gtf2a1	TF2AA_MOUSE	TB_24H-MOCK_24H	-0.623559	0.0137366	0.0765099	no	-0.623559	0.0765099	Transcription initiation factor IIA subunit 1 (General transcription factor IIA subunit 1) [Cleaved into: Transcription initiation factor IIA alpha chain (TFIIA p35 subunit); Transcription initiation factor IIA beta chain (TFIIA p19 subunit)]
P62915	Gtf2b	TF2B_MOUSE	TB_24H-MOCK_24H	-0.87539	0.000512158	0.00576326	no	-0.87539	0.00576326	Transcription initiation factor IIB (General transcription factor TFIIB) (RNA polymerase II alpha initiation factor)
Q9D0D5	Gtf2e1	T2EA_MOUSE	TB_24H-MOCK_24H	0.15229	0.746446	0.890851	no	0.15229	0.890851	General transcription factor IIE subunit 1 (General transcription factor IIE 56 kDa subunit) (Transcription initiation factor IIE subunit alpha) (TFIIE-alpha)
Q9ESZ8	Gtf2i	GTF2I_MOUSE	TB_24H-MOCK_24H	-1.40436	7.87587e-10	5.16737e-08	no	-1.40436	5.16737e-08	General transcription factor II-I (GTFII-I) (TFII-I) (Bruton tyrosine kinase-associated protein 135) (BAP-135) (BTK-associated protein 135)
Q8BMQ2	Gtf3c4	TF3C4_MOUSE	TB_24H-MOCK_24H	-0.109765	0.806654	0.9203	no	-0.109765	0.9203	General transcription factor 3C polypeptide 4 (EC 2.3.1.48) (TF3C-delta) (Transcription factor IIIC 90 kDa subunit) (TFIIIC 90 kDa subunit) (TFIIIC90) (Transcription factor IIIC subunit delta)
Q99ME9	Gtpbp4	NOG1_MOUSE	TB_24H-MOCK_24H	-1.10519	0.000805183	0.00837866	no	-1.10519	0.00837866	Nucleolar GTP-binding protein 1 (Chronic renal failure gene protein) (GTP-binding protein NGB)
Q64520	Guk1	KGUA_MOUSE	TB_24H-MOCK_24H	-0.942342	0.0115827	0.0684528	no	-0.942342	0.0684528	Guanylate kinase (EC 2.7.4.8) (GMP kinase)
P12265	Gusb	BGLR_MOUSE	TB_24H-MOCK_24H	0.470294	0.351217	0.639192	no	0.470294	0.639192	Beta-glucuronidase (EC 3.2.1.31)
Q80SU7	Gvin1	GVIN1_MOUSE	TB_24H-MOCK_24H	1.55487	3.09797e-10	2.22079e-08	no	1.55487	2.22079e-08	Interferon-induced very large GTPase 1 (Very large-inducible GTPase-1) (VLIG-1)
Q9R062	Gyg1	GLYG_MOUSE	TB_24H-MOCK_24H	-0.268422	0.168576	0.425225	no	-0.268422	0.425225	Glycogenin-1 (GN-1) (GN1) (EC 2.4.1.186)
Q9Z1E4	Gys1	GYS1_MOUSE	TB_24H-MOCK_24H	0.514412	0.102992	0.313676	no	0.514412	0.313676	Glycogen [starch] synthase, muscle (EC 2.4.1.11)
P10922	H1f0	H10_MOUSE	TB_24H-MOCK_24H	-0.593802	0.0211256	0.106125	no	-0.593802	0.106125	Histone H1.0 (Histone H1') (Histone H1(0)) (MyD196) [Cleaved into: Histone H1.0, N-terminally processed]
P27661	H2afx	H2AX_MOUSE	TB_24H-MOCK_24H	0.007272	0.990064	0.996355	no	0.007272	0.996355	Histone H2AX (H2a/x) (Histone H2A.X)
Q9QZQ8	H2afy	H2AY_MOUSE	TB_24H-MOCK_24H	-0.0337404	0.718686	0.877891	no	-0.0337404	0.877891	Core histone macro-H2A.1 (Histone macroH2A1) (mH2A1) (H2A.y) (H2A/y)
P01899	H2-D1	HA11_MOUSE	TB_24H-MOCK_24H	1.20116	7.45724e-05	0.0012129	no	1.20116	0.0012129	H-2 class I histocompatibility antigen, D-B alpha chain (H-2D(B))
P01901	H2-K1	HA1B_MOUSE	TB_24H-MOCK_24H	1.34227	1.69503e-09	1.0583e-07	no	1.34227	1.0583e-07	H-2 class I histocompatibility antigen, K-B alpha chain (H-2K(B))
P06339	H2-T23	HA15_MOUSE	TB_24H-MOCK_24H	2.93052	3.58161e-05	0.000653981	no	2.93052	0.000653981	H-2 class I histocompatibility antigen, D-37 alpha chain
Q8CFX1	H6pd	G6PE_MOUSE	TB_24H-MOCK_24H	-0.00724458	0.981233	0.992839	no	-0.00724458	0.992839	GDH/6PGL endoplasmic bifunctional protein [Includes: Glucose 1-dehydrogenase (EC 1.1.1.47) (Hexose-6-phosphate dehydrogenase); 6-phosphogluconolactonase (6PGL) (EC 3.1.1.31)]
Q9D3B1	Hacd2	HACD2_MOUSE	TB_24H-MOCK_24H	-0.299807	0.370135	0.65751	no	-0.299807	0.65751	Very-long-chain (3R)-3-hydroxyacyl-CoA dehydratase 2 (EC 4.2.1.134) (3-hydroxyacyl-CoA dehydratase 2) (HACD2) (Protein-tyrosine phosphatase-like member B)
Q8K2C9	Hacd3	HACD3_MOUSE	TB_24H-MOCK_24H	0.449996	0.360084	0.648541	no	0.449996	0.648541	Very-long-chain (3R)-3-hydroxyacyl-CoA dehydratase 3 (EC 4.2.1.134) (3-hydroxyacyl-CoA dehydratase 3) (HACD3) (Butyrate-induced protein 1) (B-ind1) (Protein-tyrosine phosphatase-like A domain-containing protein 1)
Q61425	Hadh	HCDH_MOUSE	TB_24H-MOCK_24H	-0.00956646	0.969237	0.98943	no	-0.00956646	0.98943	Hydroxyacyl-coenzyme A dehydrogenase, mitochondrial (HCDH) (EC 1.1.1.35) (Medium and short-chain L-3-hydroxyacyl-coenzyme A dehydrogenase) (Short-chain 3-hydroxyacyl-CoA dehydrogenase)
Q8BMS1	Hadha	ECHA_MOUSE	TB_24H-MOCK_24H	-0.118616	0.167768	0.423887	no	-0.118616	0.423887	Trifunctional enzyme subunit alpha, mitochondrial (TP-alpha) [Includes: Long-chain enoyl-CoA hydratase (EC 4.2.1.17); Long chain 3-hydroxyacyl-CoA dehydrogenase (EC 1.1.1.211)]
Q99JY0	Hadhb	ECHB_MOUSE	TB_24H-MOCK_24H	-0.121642	0.164116	0.418422	no	-0.121642	0.418422	Trifunctional enzyme subunit beta, mitochondrial (TP-beta) [Includes: 3-ketoacyl-CoA thiolase (EC 2.3.1.16) (Acetyl-CoA acyltransferase) (Beta-ketothiolase)]
Q61035	Hars	SYHC_MOUSE	TB_24H-MOCK_24H	-0.202109	0.449123	0.727125	no	-0.202109	0.727125	Histidine--tRNA ligase, cytoplasmic (EC 6.1.1.21) (Histidyl-tRNA synthetase) (HisRS)
Q8BY71	Hat1	HAT1_MOUSE	TB_24H-MOCK_24H	-0.776302	0.0865076	0.277901	no	-0.776302	0.277901	Histone acetyltransferase type B catalytic subunit (EC 2.3.1.48) (Histone acetyltransferase 1)
P01942	Hba	HBA_MOUSE	TB_24H-MOCK_24H	-0.849534	0.0200016	0.10228	no	-0.849534	0.10228	Hemoglobin subunit alpha (Alpha-globin) (Hemoglobin alpha chain)
P02088	Hbb-b1	HBB1_MOUSE	TB_24H-MOCK_24H	-0.906333	0.00134885	0.0128742	no	-0.906333	0.0128742	Hemoglobin subunit beta-1 (Beta-1-globin) (Hemoglobin beta-1 chain) (Hemoglobin beta-major chain)
P53702	Hccs	CCHL_MOUSE	TB_24H-MOCK_24H	-0.571401	0.0724183	0.247206	no	-0.571401	0.247206	Cytochrome c-type heme lyase (CCHL) (EC 4.4.1.17) (Holocytochrome c-type synthase)
Q61191	Hcfc1	HCFC1_MOUSE	TB_24H-MOCK_24H	-0.202182	0.0806919	0.265611	no	-0.202182	0.265611	Host cell factor 1 (HCF) (HCF-1) (C1 factor) [Cleaved into: HCF N-terminal chain 1; HCF N-terminal chain 2; HCF N-terminal chain 3; HCF N-terminal chain 4; HCF N-terminal chain 5; HCF N-terminal chain 6; HCF C-terminal chain 1; HCF C-terminal chain 2; HCF C-terminal chain 3; HCF C-terminal chain 4; HCF C-terminal chain 5; HCF C-terminal chain 6]
P08103	Hck	HCK_MOUSE	TB_24H-MOCK_24H	1.26874	5.18002e-09	2.78498e-07	no	1.26874	2.78498e-07	Tyrosine-protein kinase HCK (EC 2.7.10.2) (B-cell/myeloid kinase) (BMK) (Hematopoietic cell kinase) (Hemopoietic cell kinase) (p56-HCK/p59-HCK)
P49710	Hcls1	HCLS1_MOUSE	TB_24H-MOCK_24H	0.20973	0.589574	0.809836	no	0.20973	0.809836	Hematopoietic lineage cell-specific protein (Hematopoietic cell-specific LYN substrate 1) (LckBP1)
O09106	Hdac1	HDAC1_MOUSE	TB_24H-MOCK_24H	0.222235	0.494154	0.76024	no	0.222235	0.76024	Histone deacetylase 1 (HD1) (EC 3.5.1.98)
Q6P3E7	Hdac10	HDA10_MOUSE	TB_24H-MOCK_24H	-0.28334	0.184359	0.451108	no	-0.28334	0.451108	Histone deacetylase 10 (HD10) (EC 3.5.1.98)
P70288	Hdac2	HDAC2_MOUSE	TB_24H-MOCK_24H	-0.295267	0.351968	0.639957	no	-0.295267	0.639957	Histone deacetylase 2 (HD2) (EC 3.5.1.98) (YY1 transcription factor-binding protein)
Q9Z2V6	Hdac5	HDAC5_MOUSE	TB_24H-MOCK_24H	0.795016	0.0429027	0.172816	no	0.795016	0.172816	Histone deacetylase 5 (HD5) (EC 3.5.1.98) (Histone deacetylase mHDA1)
Q9Z2V5	Hdac6	HDAC6_MOUSE	TB_24H-MOCK_24H	-0.0308506	0.871684	0.945978	no	-0.0308506	0.945978	Histone deacetylase 6 (HD6) (EC 3.5.1.98) (Histone deacetylase mHDA2)
P51859	Hdgf	HDGF_MOUSE	TB_24H-MOCK_24H	-0.239306	0.66624	0.849871	no	-0.239306	0.849871	Hepatoma-derived growth factor (HDGF)
Q3UGR5	Hdhd2	HDHD2_MOUSE	TB_24H-MOCK_24H	-0.260701	0.263058	0.546296	no	-0.260701	0.546296	Haloacid dehalogenase-like hydrolase domain-containing protein 2
Q8VDJ3	Hdlbp	VIGLN_MOUSE	TB_24H-MOCK_24H	-0.189342	0.423319	0.703783	no	-0.189342	0.703783	Vigilin (High density lipoprotein-binding protein) (HDL-binding protein)
Q5PRF0	Heatr5a	HTR5A_MOUSE	TB_24H-MOCK_24H	0.188469	0.455891	0.732262	no	0.188469	0.732262	HEAT repeat-containing protein 5A
Q8C547	Heatr5b	HTR5B_MOUSE	TB_24H-MOCK_24H	-0.179785	0.440137	0.719144	no	-0.179785	0.719144	HEAT repeat-containing protein 5B
Q6P1G0	Heatr6	HEAT6_MOUSE	TB_24H-MOCK_24H	0.257148	0.444863	0.723123	no	0.257148	0.723123	HEAT repeat-containing protein 6
Q9R257	Hebp1	HEBP1_MOUSE	TB_24H-MOCK_24H	-0.232467	0.457176	0.732503	no	-0.232467	0.732503	Heme-binding protein 1 (p22HBP)
Q69ZR2	Hectd1	HECD1_MOUSE	TB_24H-MOCK_24H	-0.115648	0.620256	0.827756	no	-0.115648	0.827756	E3 ubiquitin-protein ligase HECTD1 (EC 2.3.2.26) (HECT domain-containing protein 1) (HECT-type E3 ubiquitin transferase HECTD1) (Protein open mind)
Q3U487	Hectd3	HECD3_MOUSE	TB_24H-MOCK_24H	-0.632893	0.00358366	0.0276893	no	-0.632893	0.0276893	E3 ubiquitin-protein ligase HECTD3 (EC 2.3.2.26) (HECT domain-containing protein 3) (HECT-type E3 ubiquitin transferase HECTD3)
Q6NVF4	Helb	HELB_MOUSE	TB_24H-MOCK_24H	0.103639	0.815988	0.923939	no	0.103639	0.923939	DNA helicase B (EC 3.6.4.12)
E9QAM5	Helz2	HELZ2_MOUSE	TB_24H-MOCK_24H	1.7918	3.15046e-06	7.91479e-05	no	1.7918	7.91479e-05	Helicase with zinc finger domain 2 (EC 3.6.4.-) (PPAR-gamma DNA-binding domain-interacting protein 1) (PDIP1) (PPAR-gamma DBD-interacting protein 1)
Q6PAV2	Herc4	HERC4_MOUSE	TB_24H-MOCK_24H	-0.233637	0.292874	0.576075	no	-0.233637	0.576075	Probable E3 ubiquitin-protein ligase HERC4 (EC 2.3.2.26) (HECT domain and RCC1-like domain-containing protein 4) (HECT-type E3 ubiquitin transferase HERC4)
F2Z461	Herc6	HERC6_MOUSE	TB_24H-MOCK_24H	2.62432	2.7587e-07	9.12729e-06	no	2.62432	9.12729e-06	E3 ISG15--protein ligase Herc6 (EC 2.3.2.-)
P29416	Hexa	HEXA_MOUSE	TB_24H-MOCK_24H	0.272608	0.401239	0.680033	no	0.272608	0.680033	Beta-hexosaminidase subunit alpha (EC 3.2.1.52) (Beta-N-acetylhexosaminidase subunit alpha) (Hexosaminidase subunit A) (N-acetyl-beta-glucosaminidase subunit alpha)
P20060	Hexb	HEXB_MOUSE	TB_24H-MOCK_24H	0.346108	0.252637	0.534828	no	0.346108	0.534828	Beta-hexosaminidase subunit beta (EC 3.2.1.52) (Beta-N-acetylhexosaminidase subunit beta) (Hexosaminidase subunit B) (N-acetyl-beta-glucosaminidase subunit beta)
P70387	Hfe	HFE_MOUSE	TB_24H-MOCK_24H	-0.479541	0.025017	0.120001	no	-0.479541	0.120001	Hereditary hemochromatosis protein homolog
Q99LI8	Hgs	HGS_MOUSE	TB_24H-MOCK_24H	-0.115506	0.537575	0.7815	no	-0.115506	0.7815	Hepatocyte growth factor-regulated tyrosine kinase substrate
Q99L13	Hibadh	3HIDH_MOUSE	TB_24H-MOCK_24H	0.133849	0.511074	0.770414	no	0.133849	0.770414	3-hydroxyisobutyrate dehydrogenase, mitochondrial (HIBADH) (EC 1.1.1.31)
Q8QZS1	Hibch	HIBCH_MOUSE	TB_24H-MOCK_24H	0.0111389	0.924083	0.96961	no	0.0111389	0.96961	3-hydroxyisobutyryl-CoA hydrolase, mitochondrial (EC 3.1.2.4) (3-hydroxyisobutyryl-coenzyme A hydrolase) (HIB-CoA hydrolase) (HIBYL-CoA-H)
Q9JLZ6	Hic2	HIC2_MOUSE	TB_24H-MOCK_24H	-0.99183	1.22539e-05	0.000252313	no	-0.99183	0.000252313	Hypermethylated in cancer 2 protein (Hic-2)
Q75VT8	Hide1	HIDE1_MOUSE	TB_24H-MOCK_24H	0.575229	0.0121118	0.0709996	no	0.575229	0.0709996	Protein HIDE1 (Highly expressed in immature dendritic cell transcript 1 protein)
Q8BLR9	Hif1an	HIF1N_MOUSE	TB_24H-MOCK_24H	-0.341636	0.114522	0.339856	no	-0.341636	0.339856	Hypoxia-inducible factor 1-alpha inhibitor (EC 1.14.11.30) (EC 1.14.11.n4) (Hypoxia-inducible factor asparagine hydroxylase)
Q9JLR9	Higd1a	HIG1A_MOUSE	TB_24H-MOCK_24H	0.103218	0.509727	0.769861	no	0.103218	0.769861	HIG1 domain family member 1A, mitochondrial (Hypoxia-inducible gene 1 protein)
P70349	Hint1	HINT1_MOUSE	TB_24H-MOCK_24H	-0.384613	0.157097	0.410064	no	-0.384613	0.410064	Histidine triad nucleotide-binding protein 1 (EC 3.-.-.-) (Adenosine 5'-monophosphoramidase) (Protein kinase C inhibitor 1) (Protein kinase C-interacting protein 1) (PKCI-1)
Q9D0S9	Hint2	HINT2_MOUSE	TB_24H-MOCK_24H	-0.185035	0.426781	0.705947	no	-0.185035	0.705947	Histidine triad nucleotide-binding protein 2, mitochondrial (HINT-2) (EC 3.-.-.-) (HINT-3)
Q8VD75	Hip1	HIP1_MOUSE	TB_24H-MOCK_24H	-0.190785	0.132232	0.370653	no	-0.190785	0.370653	Huntingtin-interacting protein 1 (HIP-1) (Huntingtin-interacting protein I) (HIP-I)
P43275	Hist1h1a	H11_MOUSE	TB_24H-MOCK_24H	-0.11746	0.589826	0.809836	no	-0.11746	0.809836	Histone H1.1 (H1 VAR.3) (Histone H1a) (H1a)
P43276	Hist1h1b	H15_MOUSE	TB_24H-MOCK_24H	-0.30628	0.246019	0.527905	no	-0.30628	0.527905	Histone H1.5 (H1 VAR.5) (H1b)
P15864	Hist1h1c	H12_MOUSE	TB_24H-MOCK_24H	-0.40404	0.307059	0.593718	no	-0.40404	0.593718	Histone H1.2 (H1 VAR.1) (H1c)
P43277	Hist1h1d	H13_MOUSE	TB_24H-MOCK_24H	-0.664315	0.00670065	0.0444909	no	-0.664315	0.0444909	Histone H1.3 (H1 VAR.4) (H1d)
P43274	Hist1h1e	H14_MOUSE	TB_24H-MOCK_24H	-0.563219	0.0033459	0.0264326	no	-0.563219	0.0264326	Histone H1.4 (H1 VAR.2) (H1e)
Q64475	Hist1h2bb	H2B1B_MOUSE	TB_24H-MOCK_24H	0.0360522	0.960268	0.984949	no	0.0360522	0.984949	Histone H2B type 1-B (h2B-143)
P10854	Hist1h2bm	H2B1M_MOUSE	TB_24H-MOCK_24H	0.562544	0.389579	0.671313	no	0.562544	0.671313	Histone H2B type 1-M (H2B 291B)
Q8CGP2	Hist1h2bp	H2B1P_MOUSE	TB_24H-MOCK_24H	-0.307906	0.38396	0.667911	no	-0.307906	0.667911	Histone H2B type 1-P
P62806	Hist1h4a; Hist1h4b; Hist1h4c; Hist1h4d; Hist1h4f; Hist1h4h; Hist1h4i; Hist1h4j; Hist1h4k; Hist1h4m; Hist2h4a; Hist4h4	H4_MOUSE	TB_24H-MOCK_24H	-0.179762	0.146924	0.395236	no	-0.179762	0.395236	Histone H4
Q64525	Hist2h2bb	H2B2B_MOUSE	TB_24H-MOCK_24H	0.213444	0.795576	0.914542	no	0.213444	0.914542	Histone H2B type 2-B (H2b 616)
Q8CGP0	Hist3h2bb	H2B3B_MOUSE	TB_24H-MOCK_24H	#NUM!		0	yes	-2.58591	0.031726	Histone H2B type 3-B
P17710	Hk1	HXK1_MOUSE	TB_24H-MOCK_24H	0.268458	0.0523775	0.198001	no	0.268458	0.198001	Hexokinase-1 (EC 2.7.1.1) (Hexokinase type I) (HK I) (Hexokinase, tumor isozyme)
O08528	Hk2	HXK2_MOUSE	TB_24H-MOCK_24H	0.427795	0.0268131	0.125906	no	0.427795	0.125906	Hexokinase-2 (EC 2.7.1.1) (Hexokinase type II) (HK II)
Q3TRM8	Hk3	HXK3_MOUSE	TB_24H-MOCK_24H	0.572102	6.08782e-07	1.79893e-05	no	0.572102	1.79893e-05	Hexokinase-3 (EC 2.7.1.1) (Hexokinase type III) (HK III)
Q91W97	Hkdc1	HKDC1_MOUSE	TB_24H-MOCK_24H	-0.44415	0.20305	0.472512	no	-0.44415	0.472512	Putative hexokinase HKDC1 (EC 2.7.1.1) (Hexokinase domain-containing protein 1)
Q9D8V0	Hm13	HM13_MOUSE	TB_24H-MOCK_24H	-0.0246409	0.897092	0.955861	no	-0.0246409	0.955861	Minor histocompatibility antigen H13 (EC 3.4.23.-) (Presenilin-like protein 3) (Signal peptide peptidase)
P22907	Hmbs	HEM3_MOUSE	TB_24H-MOCK_24H	-0.234867	0.301633	0.588223	no	-0.234867	0.588223	Porphobilinogen deaminase (PBG-D) (EC 2.5.1.61) (Hydroxymethylbilane synthase) (HMBS) (Pre-uroporphyrinogen synthase)
P17095	Hmga1	HMGA1_MOUSE	TB_24H-MOCK_24H	-0.13048	0.597358	0.81479	no	-0.13048	0.81479	High mobility group protein HMG-I/HMG-Y (HMG-I(Y)) (High mobility group AT-hook protein 1) (High mobility group protein A1)
P52927	Hmga2	HMGA2_MOUSE	TB_24H-MOCK_24H	-0.132173	0.242074	0.523301	no	-0.132173	0.523301	High mobility group protein HMGI-C (High mobility group AT-hook protein 2)
P63158	Hmgb1	HMGB1_MOUSE	TB_24H-MOCK_24H	-0.839448	0.481681	0.751547	no	-0.839448	0.751547	High mobility group protein B1 (High mobility group protein 1) (HMG-1)
P30681	Hmgb2	HMGB2_MOUSE	TB_24H-MOCK_24H	-0.435531	0.598492	0.814901	no	-0.435531	0.814901	High mobility group protein B2 (High mobility group protein 2) (HMG-2)
P38060	Hmgcl	HMGCL_MOUSE	TB_24H-MOCK_24H	0.091956	0.414646	0.694546	no	0.091956	0.694546	Hydroxymethylglutaryl-CoA lyase, mitochondrial (HL) (HMG-CoA lyase) (EC 4.1.3.4) (3-hydroxy-3-methylglutarate-CoA lyase)
Q01237	Hmgcr	HMDH_MOUSE	TB_24H-MOCK_24H	0.0915422	0.797617	0.91538	no	0.0915422	0.91538	3-hydroxy-3-methylglutaryl-coenzyme A reductase (HMG-CoA reductase) (EC 1.1.1.34)
Q8JZK9	Hmgcs1	HMCS1_MOUSE	TB_24H-MOCK_24H	-0.236846	0.425045	0.704421	no	-0.236846	0.704421	Hydroxymethylglutaryl-CoA synthase, cytoplasmic (HMG-CoA synthase) (EC 2.3.3.10) (3-hydroxy-3-methylglutaryl coenzyme A synthase)
P18608	Hmgn1	HMGN1_MOUSE	TB_24H-MOCK_24H	-0.449446	0.07196	0.246948	no	-0.449446	0.246948	Non-histone chromosomal protein HMG-14 (High mobility group nucleosome-binding domain-containing protein 1)
P09602	Hmgn2	HMGN2_MOUSE	TB_24H-MOCK_24H	-0.251645	0.585873	0.808535	no	-0.251645	0.808535	Non-histone chromosomal protein HMG-17 (High mobility group nucleosome-binding domain-containing protein 2)
Q3TBD2	Hmha1	HMHA1_MOUSE	TB_24H-MOCK_24H	-0.0755291	0.333798	0.62062	no	-0.0755291	0.62062	Minor histocompatibility protein HA-1
P14901	Hmox1	HMOX1_MOUSE	TB_24H-MOCK_24H	1.31522	7.80358e-05	0.00125865	no	1.31522	0.00125865	Heme oxygenase 1 (HO-1) (EC 1.14.14.18) (P32 protein)
O70252	Hmox2	HMOX2_MOUSE	TB_24H-MOCK_24H	0.435112	0.000263005	0.00342979	no	0.435112	0.00342979	Heme oxygenase 2 (HO-2) (EC 1.14.14.18)
P97825	Hn1	HN1_MOUSE	TB_24H-MOCK_24H	-0.0405632	0.950376	0.979474	no	-0.0405632	0.979474	Hematological and neurological expressed 1 protein [Cleaved into: Hematological and neurological expressed 1 protein, N-terminally processed]
Q91VF2	Hnmt	HNMT_MOUSE	TB_24H-MOCK_24H	-0.578434	0.0265309	0.124789	no	-0.578434	0.124789	Histamine N-methyltransferase (HMT) (EC 2.1.1.8)
Q9CX86	Hnrnpa0	ROA0_MOUSE	TB_24H-MOCK_24H	-0.526237	0.0158343	0.0853686	no	-0.526237	0.0853686	Heterogeneous nuclear ribonucleoprotein A0 (hnRNP A0)
P49312	Hnrnpa1	ROA1_MOUSE	TB_24H-MOCK_24H	-0.307482	0.145021	0.392373	no	-0.307482	0.392373	Heterogeneous nuclear ribonucleoprotein A1 (hnRNP A1) (HDP-1) (Helix-destabilizing protein) (Single-strand-binding protein) (Topoisomerase-inhibitor suppressed) (hnRNP core protein A1) [Cleaved into: Heterogeneous nuclear ribonucleoprotein A1, N-terminally processed]
O88569	Hnrnpa2b1	ROA2_MOUSE	TB_24H-MOCK_24H	-0.239208	0.073502	0.24998	no	-0.239208	0.24998	Heterogeneous nuclear ribonucleoproteins A2/B1 (hnRNP A2/B1)
Q8BG05	Hnrnpa3	ROA3_MOUSE	TB_24H-MOCK_24H	-0.19309	0.280091	0.562207	no	-0.19309	0.562207	Heterogeneous nuclear ribonucleoprotein A3 (hnRNP A3)
Q99020	Hnrnpab	ROAA_MOUSE	TB_24H-MOCK_24H	-0.308699	0.217673	0.487847	no	-0.308699	0.487847	Heterogeneous nuclear ribonucleoprotein A/B (hnRNP A/B) (CArG-binding factor-A) (CBF-A)
Q9Z204	Hnrnpc	HNRPC_MOUSE	TB_24H-MOCK_24H	-0.254103	0.0178788	0.0933993	no	-0.254103	0.0933993	Heterogeneous nuclear ribonucleoproteins C1/C2 (hnRNP C1/C2)
Q60668	Hnrnpd	HNRPD_MOUSE	TB_24H-MOCK_24H	-0.162238	0.510644	0.770414	no	-0.162238	0.770414	Heterogeneous nuclear ribonucleoprotein D0 (hnRNP D0) (AU-rich element RNA-binding protein 1)
Q9Z130	Hnrnpdl	HNRDL_MOUSE	TB_24H-MOCK_24H	-0.728711	0.0204157	0.104122	no	-0.728711	0.104122	Heterogeneous nuclear ribonucleoprotein D-like (hnRNP D-like) (hnRNP DL) (JKT41-binding protein)
Q9Z2X1	Hnrnpf	HNRPF_MOUSE	TB_24H-MOCK_24H	-0.416028	0.132006	0.37064	no	-0.416028	0.37064	Heterogeneous nuclear ribonucleoprotein F (hnRNP F) [Cleaved into: Heterogeneous nuclear ribonucleoprotein F, N-terminally processed]
O35737	Hnrnph1	HNRH1_MOUSE	TB_24H-MOCK_24H	-0.56303	0.0314343	0.140025	no	-0.56303	0.140025	Heterogeneous nuclear ribonucleoprotein H (hnRNP H) [Cleaved into: Heterogeneous nuclear ribonucleoprotein H, N-terminally processed]
P70333	Hnrnph2	HNRH2_MOUSE	TB_24H-MOCK_24H	0.413011	0.0345029	0.148566	no	0.413011	0.148566	Heterogeneous nuclear ribonucleoprotein H2 (hnRNP H2) (Heterogeneous nuclear ribonucleoprotein H') (hnRNP H') [Cleaved into: Heterogeneous nuclear ribonucleoprotein H2, N-terminally processed]
P61979	Hnrnpk	HNRPK_MOUSE	TB_24H-MOCK_24H	-0.389019	0.321741	0.607245	no	-0.389019	0.607245	Heterogeneous nuclear ribonucleoprotein K (hnRNP K)
Q8R081	Hnrnpl	HNRPL_MOUSE	TB_24H-MOCK_24H	-0.299068	0.0109376	0.0656426	no	-0.299068	0.0656426	Heterogeneous nuclear ribonucleoprotein L (hnRNP L)
Q921F4	Hnrnpll	HNRLL_MOUSE	TB_24H-MOCK_24H	-0.203226	0.467149	0.739908	no	-0.203226	0.739908	Heterogeneous nuclear ribonucleoprotein L-like
Q9D0E1	Hnrnpm	HNRPM_MOUSE	TB_24H-MOCK_24H	-0.0120471	0.817278	0.923973	no	-0.0120471	0.923973	Heterogeneous nuclear ribonucleoprotein M (hnRNP M)
Q8VEK3	Hnrnpu	HNRPU_MOUSE	TB_24H-MOCK_24H	-0.120342	0.287273	0.570273	no	-0.120342	0.570273	Heterogeneous nuclear ribonucleoprotein U (hnRNP U) (Scaffold attachment factor A) (SAF-A)
Q8VDM6	Hnrnpul1	HNRL1_MOUSE	TB_24H-MOCK_24H	-0.171507	0.28004	0.562207	no	-0.171507	0.562207	Heterogeneous nuclear ribonucleoprotein U-like protein 1
Q00PI9	Hnrnpul2	HNRL2_MOUSE	TB_24H-MOCK_24H	-0.0587933	0.631131	0.834363	no	-0.0587933	0.834363	Heterogeneous nuclear ribonucleoprotein U-like protein 2 (MLF1-associated nuclear protein)
Q99JP6	Homer3	HOME3_MOUSE	TB_24H-MOCK_24H	-0.264154	0.330518	0.617487	no	-0.264154	0.617487	Homer protein homolog 3 (Homer-3)
Q8BUK6	Hook3	HOOK3_MOUSE	TB_24H-MOCK_24H	-0.353143	0.0646548	0.228983	no	-0.353143	0.228983	Protein Hook homolog 3 (mHK3)
Q3TEA8	Hp1bp3	HP1B3_MOUSE	TB_24H-MOCK_24H	0.21354	0.0483416	0.186972	no	0.21354	0.186972	Heterochromatin protein 1-binding protein 3
P62748	Hpcal1	HPCL1_MOUSE	TB_24H-MOCK_24H	-0.357101	0.545065	0.786529	no	-0.357101	0.786529	Hippocalcin-like protein 1 (Neural visinin-like protein 3) (NVL-3) (NVP-3) (Visinin-like protein 3) (VILIP-3)
Q8CFE2	Hpf1	HPF1_MOUSE	TB_24H-MOCK_24H	-1.20646	1.18763e-06	3.19259e-05	no	-1.20646	3.19259e-05	Histone PARylation factor 1
Q9JHF7	Hpgds	HPGDS_MOUSE	TB_24H-MOCK_24H	-0.666252	0.0269305	0.126208	no	-0.666252	0.126208	Hematopoietic prostaglandin D synthase (H-PGDS) (EC 5.3.99.2) (GST class-sigma) (Glutathione S-transferase) (EC 2.5.1.18) (Glutathione-dependent PGD synthase) (Glutathione-requiring prostaglandin D synthase) (Prostaglandin-H2 D-isomerase)
P00493	Hprt1	HPRT_MOUSE	TB_24H-MOCK_24H	0.0840177	0.841406	0.934064	no	0.0840177	0.934064	Hypoxanthine-guanine phosphoribosyltransferase (HGPRT) (HGPRTase) (EC 2.4.2.8) (HPRT B)
Q8BLY7	Hps6	HPS6_MOUSE	TB_24H-MOCK_24H	-0.13499	0.725305	0.880695	no	-0.13499	0.880695	Hermansky-Pudlak syndrome 6 protein homolog (Ruby-eye protein) (Ru)
Q6YGZ1	Hpse	HPSE_MOUSE	TB_24H-MOCK_24H	0.446935	0.000273736	0.00354392	no	0.446935	0.00354392	Heparanase (EC 3.2.1.166) (Endo-glucoronidase) [Cleaved into: Heparanase 8 kDa subunit; Heparanase 50 kDa subunit]
Q61411	Hras	RASH_MOUSE	TB_24H-MOCK_24H	0.101142	0.785481	0.909541	no	0.101142	0.909541	GTPase HRas (H-Ras-1) (Transforming protein p21) (c-H-ras) (p21ras) [Cleaved into: GTPase HRas, N-terminally processed]
Q3TC93	Hs1bp3	H1BP3_MOUSE	TB_24H-MOCK_24H	-0.0836983	0.673476	0.852732	no	-0.0836983	0.852732	HCLS1-binding protein 3 (HS1-binding protein 3) (HSP1BP-3)
Q8R3H7	Hs2st1	HS2ST_MOUSE	TB_24H-MOCK_24H	-0.10009	0.783967	0.908687	no	-0.10009	0.908687	Heparan sulfate 2-O-sulfotransferase 1 (2-O-sulfotransferase) (2-OST) (2OST) (EC 2.8.2.-)
Q8K3A0	Hscb	HSC20_MOUSE	TB_24H-MOCK_24H	-0.361658	0.289984	0.573596	no	-0.361658	0.573596	Iron-sulfur cluster co-chaperone protein HscB, mitochondrial (Hsc20)
O08756	Hsd17b10	HCD2_MOUSE	TB_24H-MOCK_24H	0.287532	0.143296	0.389535	no	0.287532	0.389535	3-hydroxyacyl-CoA dehydrogenase type-2 (EC 1.1.1.35) (17-beta-hydroxysteroid dehydrogenase 10) (17-beta-HSD 10) (EC 1.1.1.51) (3-hydroxy-2-methylbutyryl-CoA dehydrogenase) (EC 1.1.1.178) (3-hydroxyacyl-CoA dehydrogenase type II) (Endoplasmic reticulum-associated amyloid beta-peptide-binding protein) (Mitochondrial ribonuclease P protein 2) (Mitochondrial RNase P protein 2) (Type II HADH)
Q9EQ06	Hsd17b11	DHB11_MOUSE	TB_24H-MOCK_24H	-0.13426	0.38738	0.66997	no	-0.13426	0.66997	Estradiol 17-beta-dehydrogenase 11 (EC 1.1.1.62) (17-beta-hydroxysteroid dehydrogenase 11) (17-beta-HSD 11) (17bHSD11) (17betaHSD11) (17-beta-hydroxysteroid dehydrogenase XI) (17-beta-HSD XI) (17betaHSDXI) (Dehydrogenase/reductase SDR family member 8)
O70503	Hsd17b12	DHB12_MOUSE	TB_24H-MOCK_24H	-0.188955	0.188615	0.455471	no	-0.188955	0.455471	Very-long-chain 3-oxoacyl-CoA reductase (EC 1.1.1.330) (17-beta-hydroxysteroid dehydrogenase 12) (17-beta-HSD 12) (3-ketoacyl-CoA reductase) (KAR) (Estradiol 17-beta-dehydrogenase 12) (EC 1.1.1.62) (KIK-I)
P51660	Hsd17b4	DHB4_MOUSE	TB_24H-MOCK_24H	-0.1467	0.466023	0.739355	no	-0.1467	0.739355	Peroxisomal multifunctional enzyme type 2 (MFE-2) (17-beta-hydroxysteroid dehydrogenase 4) (17-beta-HSD 4) (D-bifunctional protein) (DBP) (Multifunctional protein 2) (MPF-2) [Cleaved into: (3R)-hydroxyacyl-CoA dehydrogenase (EC 1.1.1.n12); Enoyl-CoA hydratase 2 (EC 4.2.1.107) (EC 4.2.1.119) (3-alpha,7-alpha,12-alpha-trihydroxy-5-beta-cholest-24-enoyl-CoA hydratase)]
P50171	Hsd17b8	DHB8_MOUSE	TB_24H-MOCK_24H	-0.0394447	0.864544	0.945548	no	-0.0394447	0.945548	Estradiol 17-beta-dehydrogenase 8 (EC 1.1.1.62) (17-beta-hydroxysteroid dehydrogenase 8) (17-beta-HSD 8) (3-ketoacyl-[acyl-carrier-protein] reductase alpha subunit) (KAR alpha subunit) (3-oxoacyl-[acyl-carrier-protein] reductase) (EC 1.1.1.-) (Protein Ke6) (Ke-6) (Testosterone 17-beta-dehydrogenase 8) (EC 1.1.1.239)
Q8BTX9	Hsdl1	HSDL1_MOUSE	TB_24H-MOCK_24H	0.181356	0.499403	0.764106	no	0.181356	0.764106	Inactive hydroxysteroid dehydrogenase-like protein 1
Q2TPA8	Hsdl2	HSDL2_MOUSE	TB_24H-MOCK_24H	-0.462664	0.0477232	0.185523	no	-0.462664	0.185523	Hydroxysteroid dehydrogenase-like protein 2 (EC 1.-.-.-)
P07901	Hsp90aa1	HS90A_MOUSE	TB_24H-MOCK_24H	-0.0536634	0.574684	0.802201	no	-0.0536634	0.802201	Heat shock protein HSP 90-alpha (Heat shock 86 kDa) (HSP 86) (HSP86) (Tumor-specific transplantation 86 kDa antigen) (TSTA)
P11499	Hsp90ab1	HS90B_MOUSE	TB_24H-MOCK_24H	-0.0782781	0.518117	0.772261	no	-0.0782781	0.772261	Heat shock protein HSP 90-beta (Heat shock 84 kDa) (HSP 84) (HSP84) (Tumor-specific transplantation 84 kDa antigen) (TSTA)
P08113	Hsp90b1	ENPL_MOUSE	TB_24H-MOCK_24H	0.1241	0.0694055	0.240744	no	0.1241	0.240744	Endoplasmin (94 kDa glucose-regulated protein) (GRP-94) (Endoplasmic reticulum resident protein 99) (ERp99) (Heat shock protein 90 kDa beta member 1) (Polymorphic tumor rejection antigen 1) (Tumor rejection antigen gp96)
Q99M31	Hspa14	HSP7E_MOUSE	TB_24H-MOCK_24H	-0.419692	0.137402	0.381552	no	-0.419692	0.381552	Heat shock 70 kDa protein 14 (NST-1) (hsr.1)
Q61696	Hspa1a	HS71A_MOUSE	TB_24H-MOCK_24H	0.0366234	0.967827	0.988623	no	0.0366234	0.988623	Heat shock 70 kDa protein 1A (Heat shock 70 kDa protein 3) (HSP70.3) (Hsp68)
Q61316	Hspa4	HSP74_MOUSE	TB_24H-MOCK_24H	-0.243041	0.0101832	0.0621752	no	-0.243041	0.0621752	Heat shock 70 kDa protein 4 (Heat shock 70-related protein APG-2)
P48722	Hspa4l	HS74L_MOUSE	TB_24H-MOCK_24H	0.0479516	0.834743	0.930671	no	0.0479516	0.930671	Heat shock 70 kDa protein 4L (Heat shock 70-related protein APG-1) (Osmotic stress protein 94)
P20029	Hspa5	GRP78_MOUSE	TB_24H-MOCK_24H	0.161321	0.0837251	0.27287	no	0.161321	0.27287	78 kDa glucose-regulated protein (GRP-78) (Heat shock 70 kDa protein 5) (Immunoglobulin heavy chain-binding protein) (BiP)
P63017	Hspa8	HSP7C_MOUSE	TB_24H-MOCK_24H	0.160652	0.0519242	0.196864	no	0.160652	0.196864	Heat shock cognate 71 kDa protein (Heat shock 70 kDa protein 8)
P38647	Hspa9	GRP75_MOUSE	TB_24H-MOCK_24H	-0.0985049	0.266376	0.550721	no	-0.0985049	0.550721	Stress-70 protein, mitochondrial (75 kDa glucose-regulated protein) (GRP-75) (Heat shock 70 kDa protein 9) (Mortalin) (Peptide-binding protein 74) (PBP74) (p66 MOT)
Q99P31	Hspbp1	HPBP1_MOUSE	TB_24H-MOCK_24H	-0.516335	0.0731337	0.249208	no	-0.516335	0.249208	Hsp70-binding protein 1 (HspBP1) (Heat shock protein-binding protein 1) (Hsp70-interacting protein 1)
P63038	Hspd1	CH60_MOUSE	TB_24H-MOCK_24H	0.0943057	0.567657	0.799055	no	0.0943057	0.799055	60 kDa heat shock protein, mitochondrial (60 kDa chaperonin) (Chaperonin 60) (CPN60) (HSP-65) (Heat shock protein 60) (HSP-60) (Hsp60) (Mitochondrial matrix protein P1)
Q64433	Hspe1	CH10_MOUSE	TB_24H-MOCK_24H	0.348292	0.522061	0.773799	no	0.348292	0.773799	10 kDa heat shock protein, mitochondrial (Hsp10) (10 kDa chaperonin) (Chaperonin 10) (CPN10)
Q61699	Hsph1	HS105_MOUSE	TB_24H-MOCK_24H	-0.251293	0.124611	0.356745	no	-0.251293	0.356745	Heat shock protein 105 kDa (42 degrees C-HSP) (Heat shock 110 kDa protein) (Heat shock-related 100 kDa protein E7I) (HSP-E7I)
Q9Z2G9	Htatip2	HTAI2_MOUSE	TB_24H-MOCK_24H	-0.235431	0.478633	0.748601	no	-0.235431	0.748601	Oxidoreductase HTATIP2 (EC 1.1.1.-)
Q9JIY5	Htra2	HTRA2_MOUSE	TB_24H-MOCK_24H	-0.246489	0.280159	0.562207	no	-0.246489	0.562207	Serine protease HTRA2, mitochondrial (EC 3.4.21.108) (High temperature requirement protein A2) (HtrA2) (Omi stress-regulated endoprotease) (Serine protease 25) (Serine proteinase OMI)
P42859	Htt	HD_MOUSE	TB_24H-MOCK_24H	0.0490898	0.839497	0.933307	no	0.0490898	0.933307	Huntingtin (Huntington disease protein homolog) (HD protein homolog)
Q7TMY8	Huwe1	HUWE1_MOUSE	TB_24H-MOCK_24H	-0.562671	0.00294652	0.0240126	no	-0.562671	0.0240126	E3 ubiquitin-protein ligase HUWE1 (EC 2.3.2.26) (E3Histone) (HECT, UBA and WWE domain-containing protein 1) (HECT-type E3 ubiquitin transferase HUWE1) (Upstream regulatory element-binding protein 1) (URE-B1) (URE-binding protein 1)
Q3U2S8	Hvcn1	HVCN1_MOUSE	TB_24H-MOCK_24H	0.408913	0.127311	0.361305	no	0.408913	0.361305	Voltage-gated hydrogen channel 1 (Hydrogen voltage-gated channel 1) (HV1) (Voltage sensor domain-only protein) (mVSOP)
Q9JKR6	Hyou1	HYOU1_MOUSE	TB_24H-MOCK_24H	0.107518	0.521907	0.773799	no	0.107518	0.773799	Hypoxia up-regulated protein 1 (GRP-170) (140 kDa Ca(2+)-binding protein) (CBP-140)
Q9DB29	Iah1	IAH1_MOUSE	TB_24H-MOCK_24H	0.169344	0.379084	0.664596	no	0.169344	0.664596	Isoamyl acetate-hydrolyzing esterase 1 homolog (EC 3.1.-.-)
Q8BU30	Iars	SYIC_MOUSE	TB_24H-MOCK_24H	-0.209733	0.0904446	0.285107	no	-0.209733	0.285107	Isoleucine--tRNA ligase, cytoplasmic (EC 6.1.1.5) (Isoleucyl-tRNA synthetase) (IRS) (IleRS)
Q8BIJ6	Iars2	SYIM_MOUSE	TB_24H-MOCK_24H	0.0205245	0.883615	0.949907	no	0.0205245	0.949907	Isoleucine--tRNA ligase, mitochondrial (EC 6.1.1.5) (Isoleucyl-tRNA synthetase) (IleRS)
Q8CAK1	Iba57	CAF17_MOUSE	TB_24H-MOCK_24H	0.162096	0.533144	0.778986	no	0.162096	0.778986	Putative transferase CAF17 homolog, mitochondrial (EC 2.1.-.-) (Iron-sulfur cluster assembly factor homolog)
P13597	Icam1	ICAM1_MOUSE	TB_24H-MOCK_24H	2.00363	1.95399e-12	2.22468e-10	no	2.00363	2.22468e-10	Intercellular adhesion molecule 1 (ICAM-1) (MALA-2) (MyD10) (CD antigen CD54)
Q9JHR7	Ide	IDE_MOUSE	TB_24H-MOCK_24H	-0.468847	0.0130502	0.0739471	no	-0.468847	0.0739471	Insulin-degrading enzyme (EC 3.4.24.56) (Insulin protease) (Insulinase) (Insulysin)
O88844	Idh1	IDHC_MOUSE	TB_24H-MOCK_24H	0.000107145	0.99938	0.999767	no	0.000107145	0.999767	Isocitrate dehydrogenase [NADP] cytoplasmic (IDH) (EC 1.1.1.42) (Cytosolic NADP-isocitrate dehydrogenase) (IDP) (NADP(+)-specific ICDH) (Oxalosuccinate decarboxylase)
P54071	Idh2	IDHP_MOUSE	TB_24H-MOCK_24H	-0.0567241	0.700263	0.869421	no	-0.0567241	0.869421	Isocitrate dehydrogenase [NADP], mitochondrial (IDH) (EC 1.1.1.42) (ICD-M) (IDP) (NADP(+)-specific ICDH) (Oxalosuccinate decarboxylase)
Q9D6R2	Idh3a	IDH3A_MOUSE	TB_24H-MOCK_24H	-0.11442	0.301219	0.588007	no	-0.11442	0.588007	Isocitrate dehydrogenase [NAD] subunit alpha, mitochondrial (EC 1.1.1.41) (Isocitric dehydrogenase subunit alpha) (NAD(+)-specific ICDH subunit alpha)
P70404	Idh3g	IDHG1_MOUSE	TB_24H-MOCK_24H	-0.230344	0.15316	0.403918	no	-0.230344	0.403918	Isocitrate dehydrogenase [NAD] subunit gamma 1, mitochondrial (EC 1.1.1.41) (Isocitric dehydrogenase subunit gamma) (NAD(+)-specific ICDH subunit gamma)
P58044	Idi1	IDI1_MOUSE	TB_24H-MOCK_24H	-1.29953	0.00883767	0.0554467	no	-1.29953	0.0554467	Isopentenyl-diphosphate Delta-isomerase 1 (EC 5.3.3.2) (Isopentenyl pyrophosphate isomerase 1) (IPP isomerase 1) (IPPI1)
O35368	Ifi203	IFI3_MOUSE	TB_24H-MOCK_24H	0.0924472	0.865466	0.945551	no	0.0924472	0.945551	Interferon-activable protein 203 (Ifi-203) (Interferon-inducible protein p203)
P0DOV2	Ifi204	IFI4_MOUSE	TB_24H-MOCK_24H	1.02196	1.27639e-05	0.000260048	no	1.02196	0.000260048	Interferon-activable protein 204 (Ifi-204) (Interferon-inducible protein p204)
Q8CGE8	Ifi205a	IFI5A_MOUSE	TB_24H-MOCK_24H	#NUM!		0	yes	5.62893	0.0294412	Interferon-activable protein 205-A (Ifi-205-A) (Interferon-inducible protein p205-A) (Protein D3')
Q9ESY9	Ifi30	GILT_MOUSE	TB_24H-MOCK_24H	0.0780306	0.83976	0.933307	no	0.0780306	0.933307	Gamma-interferon-inducible lysosomal thiol reductase (EC 1.8.-.-) (Gamma-interferon-inducible protein IP-30) (Lysosomal thiol reductase IP30)
Q9D8C4	Ifi35	IN35_MOUSE	TB_24H-MOCK_24H	1.73402	1.82922e-08	8.63527e-07	no	1.73402	8.63527e-07	Interferon-induced 35 kDa protein homolog (IFP 35) (Ifi-35)
Q8R5F7	Ifih1	IFIH1_MOUSE	TB_24H-MOCK_24H	2.40757	1.18187e-09	7.58205e-08	no	2.40757	7.58205e-08	Interferon-induced helicase C domain-containing protein 1 (EC 3.6.4.13) (Helicase with 2 CARD domains) (Helicard) (Interferon induced with helicase C domain protein 1) (Melanoma differentiation-associated protein 5) (MDA-5) (RIG-I-like receptor 2) (RLR-2)
Q64282	Ifit1	IFIT1_MOUSE	TB_24H-MOCK_24H	3.68249	4.44089e-16	9.04773e-14	no	3.68249	9.04773e-14	Interferon-induced protein with tetratricopeptide repeats 1 (IFIT-1) (Glucocorticoid-attenuated response gene 16 protein) (GARG-16) (Interferon-induced 56 kDa protein) (IFI-56K) (P56)
Q64112	Ifit2	IFIT2_MOUSE	TB_24H-MOCK_24H	3.92337	5.77316e-15	1.06419e-12	no	3.92337	1.06419e-12	Interferon-induced protein with tetratricopeptide repeats 2 (IFIT-2) (Glucocorticoid-attenuated response gene 39 protein) (GARG-39) (Interferon-induced 54 kDa protein) (IFI-54K) (P54)
Q64345	Ifit3	IFIT3_MOUSE	TB_24H-MOCK_24H	3.62751	0	0	no	3.62751	0	Interferon-induced protein with tetratricopeptide repeats 3 (IFIT-3) (Glucocorticoid-attenuated response gene 49 protein) (GARG-49) (P49) (IRG2)
Q99J93	Ifitm2	IFM2_MOUSE	TB_24H-MOCK_24H	0.982554	0.0243853	0.1177	no	0.982554	0.1177	Interferon-induced transmembrane protein 2 (Dispanin subfamily A member 2c) (DSPA2c) (Fragilis protein 3)
Q9CQW9	Ifitm3	IFM3_MOUSE	TB_24H-MOCK_24H	1.10634	1.08115e-08	5.29765e-07	no	1.10634	5.29765e-07	Interferon-induced transmembrane protein 3 (Dispanin subfamily A member 2b) (DSPA2b) (Fragilis protein) (Interferon-inducible protein 15) (Mouse ifitm-like protein 1) (Mil-1)
P19182	Ifrd1	IFRD1_MOUSE	TB_24H-MOCK_24H	0.478899	0.331638	0.618387	no	0.478899	0.618387	Interferon-related developmental regulator 1 (Nerve growth factor-inducible protein PC4) (TPA-induced sequence 7) (TIS7 protein)
Q9DAI2	Ift22	IFT22_MOUSE	TB_24H-MOCK_24H	0.958386	0.018317	0.0949426	no	0.958386	0.0949426	Intraflagellar transport protein 22 homolog (Rab-like protein 5)
Q61249	Igbp1	IGBP1_MOUSE	TB_24H-MOCK_24H	0.169667	0.375052	0.661123	no	0.169667	0.661123	Immunoglobulin-binding protein 1 (Alpha4 phosphoprotein) (CD79a-binding protein 1) (Lymphocyte signal transduction molecule alpha 4) (Protein phosphatase 2/4/6 regulatory subunit) (p52)
Q5SF07	Igf2bp2	IF2B2_MOUSE	TB_24H-MOCK_24H	0.566878	0.0358108	0.151528	no	0.566878	0.151528	Insulin-like growth factor 2 mRNA-binding protein 2 (IGF2 mRNA-binding protein 2) (IMP-2) (IGF-II mRNA-binding protein 2) (VICKZ family member 2)
Q9CPN8	Igf2bp3	IF2B3_MOUSE	TB_24H-MOCK_24H	0.633358	0.00549513	0.0384659	no	0.633358	0.0384659	Insulin-like growth factor 2 mRNA-binding protein 3 (IGF2 mRNA-binding protein 3) (IMP-3) (mIMP-3) (IGF-II mRNA-binding protein 3) (VICKZ family member 3)
Q07113	Igf2r	MPRI_MOUSE	TB_24H-MOCK_24H	-0.759652	0.00218602	0.019232	no	-0.759652	0.019232	Cation-independent mannose-6-phosphate receptor (CI Man-6-P receptor) (CI-MPR) (M6PR) (300 kDa mannose 6-phosphate receptor) (MPR 300) (Insulin-like growth factor 2 receptor) (Insulin-like growth factor II receptor) (IGF-II receptor) (M6P/IGF2 receptor) (M6P/IGF2R) (CD antigen CD222)
P0C6B7	Igsf6	IGSF6_MOUSE	TB_24H-MOCK_24H	0.726061	0.0533143	0.19989	no	0.726061	0.19989	Immunoglobulin superfamily member 6 (IgSF6)
Q9QZ85	Iigp1	IIGP1_MOUSE	TB_24H-MOCK_24H	4.66499	5.08704e-12	5.46998e-10	no	4.66499	5.46998e-10	Interferon-inducible GTPase 1 (EC 3.6.5.-)
Q9Z1M8	Ik	RED_MOUSE	TB_24H-MOCK_24H	-0.299795	0.0642913	0.227904	no	-0.299795	0.227904	Protein Red (Cytokine IK) (IK factor) (Protein RER)
Q7TT37	Ikbkap	ELP1_MOUSE	TB_24H-MOCK_24H	-0.240181	0.512813	0.771211	no	-0.240181	0.771211	Elongator complex protein 1 (ELP1) (IkappaB kinase complex-associated protein) (IKK complex-associated protein)
O88351	Ikbkb	IKKB_MOUSE	TB_24H-MOCK_24H	-0.309979	0.0579052	0.212869	no	-0.309979	0.212869	Inhibitor of nuclear factor kappa-B kinase subunit beta (I-kappa-B-kinase beta) (IKK-B) (IKK-beta) (IkBKB) (EC 2.7.11.10) (I-kappa-B kinase 2) (IKK2) (Nuclear factor NF-kappa-B inhibitor kinase beta) (NFKBIKB)
Q9R0T8	Ikbke	IKKE_MOUSE	TB_24H-MOCK_24H	1.41314	0.00923553	0.0572607	no	1.41314	0.0572607	Inhibitor of nuclear factor kappa-B kinase subunit epsilon (I-kappa-B kinase epsilon) (IKK-E) (IKK-epsilon) (IkBKE) (EC 2.7.11.10) (Inducible I kappa-B kinase) (IKK-i)
O88522	Ikbkg	NEMO_MOUSE	TB_24H-MOCK_24H	-0.223995	0.270419	0.555032	no	-0.223995	0.555032	NF-kappa-B essential modulator (NEMO) (IkB kinase-associated protein 1) (IKKAP1) (mFIP-3) (Inhibitor of nuclear factor kappa-B kinase subunit gamma) (I-kappa-B kinase subunit gamma) (IKK-gamma) (IKKG) (IkB kinase subunit gamma) (NF-kappa-B essential modifier)
Q03267	Ikzf1	IKZF1_MOUSE	TB_24H-MOCK_24H	0.334896	0.33576	0.622774	no	0.334896	0.622774	DNA-binding protein Ikaros (Ikaros family zinc finger protein 1) (Lymphoid transcription factor LyF-1)
O54824	Il16	IL16_MOUSE	TB_24H-MOCK_24H	-0.155633	0.417941	0.697962	no	-0.155633	0.697962	Pro-interleukin-16 [Cleaved into: Interleukin-16 (IL-16) (Lymphocyte chemoattractant factor) (LCF)]
P70380	Il18	IL18_MOUSE	TB_24H-MOCK_24H	2.32285	4.03891e-09	2.26589e-07	no	2.32285	2.26589e-07	Interleukin-18 (IL-18) (Interferon gamma-inducing factor) (IFN-gamma-inducing factor) (Interleukin-1 gamma) (IL-1 gamma)
P10749	Il1b	IL1B_MOUSE	TB_24H-MOCK_24H	1.29044	0.00147242	0.0138343	no	1.29044	0.0138343	Interleukin-1 beta (IL-1 beta)
P25085	Il1rn	IL1RA_MOUSE	TB_24H-MOCK_24H	5.22309	4.49783e-09	2.4873e-07	no	5.22309	2.4873e-07	Interleukin-1 receptor antagonist protein (IL-1RN) (IL-1ra) (IRAP) (IL1 inhibitor)
P26952	Il3ra	IL3RA_MOUSE	TB_24H-MOCK_24H	0.249357	0.224384	0.498826	no	0.249357	0.498826	Interleukin-3 receptor subunit alpha (IL-3 receptor subunit alpha) (IL-3R subunit alpha) (IL-3R-alpha) (IL-3RA) (Interleukin-3 receptor class II alpha chain) (CD antigen CD123)
Q9CXY6	Ilf2	ILF2_MOUSE	TB_24H-MOCK_24H	-0.011662	0.959691	0.984618	no	-0.011662	0.984618	Interleukin enhancer-binding factor 2 (Nuclear factor of activated T-cells 45 kDa)
Q9Z1X4	Ilf3	ILF3_MOUSE	TB_24H-MOCK_24H	-0.224533	0.0508586	0.19444	no	-0.224533	0.19444	Interleukin enhancer-binding factor 3
O55222	Ilk	ILK_MOUSE	TB_24H-MOCK_24H	-0.165319	0.12469	0.356745	no	-0.165319	0.356745	Integrin-linked protein kinase (EC 2.7.11.1)
Q8BU33	Ilvbl	ILVBL_MOUSE	TB_24H-MOCK_24H	-0.0888676	0.740774	0.887169	no	-0.0888676	0.887169	Acetolactate synthase-like protein (EC 2.2.1.-) (IlvB-like protein)
Q8CAQ8	Immt	MIC60_MOUSE	TB_24H-MOCK_24H	-0.013779	0.872989	0.945978	no	-0.013779	0.945978	MICOS complex subunit Mic60 (Mitochondrial inner membrane protein) (Mitofilin)
O55023	Impa1	IMPA1_MOUSE	TB_24H-MOCK_24H	0.0621134	0.426954	0.705947	no	0.0621134	0.705947	Inositol monophosphatase 1 (IMP 1) (IMPase 1) (EC 3.1.3.25) (D-galactose 1-phosphate phosphatase) (EC 3.1.3.94) (Inositol-1(or 4)-monophosphatase 1) (Lithium-sensitive myo-inositol monophosphatase A1)
Q91UZ5	Impa2	IMPA2_MOUSE	TB_24H-MOCK_24H	-0.404552	0.200778	0.469741	no	-0.404552	0.469741	Inositol monophosphatase 2 (IMP 2) (IMPase 2) (EC 3.1.3.25) (Inositol-1(or 4)-monophosphatase 2) (Myo-inositol monophosphatase A2)
O55091	Impact	IMPCT_MOUSE	TB_24H-MOCK_24H	0.0244012	0.939571	0.976589	no	0.0244012	0.976589	Protein IMPACT (Imprinted and ancient gene protein)
P50096	Impdh1	IMDH1_MOUSE	TB_24H-MOCK_24H	-0.140271	0.572396	0.801644	no	-0.140271	0.801644	Inosine-5'-monophosphate dehydrogenase 1 (IMP dehydrogenase 1) (IMPD 1) (IMPDH 1) (EC 1.1.1.205) (IMPDH-I)
P24547	Impdh2	IMDH2_MOUSE	TB_24H-MOCK_24H	-0.722921	0.0141827	0.078504	no	-0.722921	0.078504	Inosine-5'-monophosphate dehydrogenase 2 (IMP dehydrogenase 2) (IMPD 2) (IMPDH 2) (EC 1.1.1.205) (IMPDH-II)
Q9WU62	Incenp	INCE_MOUSE	TB_24H-MOCK_24H	-0.114286	0.843221	0.934373	no	-0.114286	0.934373	Inner centromere protein
Q0GNC1	Inf2	INF2_MOUSE	TB_24H-MOCK_24H	-0.736718	0.0129411	0.073561	no	-0.736718	0.073561	Inverted formin-2
P49442	Inpp1	INPP_MOUSE	TB_24H-MOCK_24H	-0.223963	0.387751	0.670083	no	-0.223963	0.670083	Inositol polyphosphate 1-phosphatase (IPP) (IPPase) (EC 3.1.3.57)
Q9EPW0	Inpp4a	INP4A_MOUSE	TB_24H-MOCK_24H	-0.052689	0.865185	0.945548	no	-0.052689	0.945548	Type I inositol 3,4-bisphosphate 4-phosphatase (EC 3.1.3.66) (Inositol polyphosphate 4-phosphatase type I)
Q9ES52	Inpp5d	SHIP1_MOUSE	TB_24H-MOCK_24H	-0.0951632	0.55478	0.790903	no	-0.0951632	0.790903	Phosphatidylinositol 3,4,5-trisphosphate 5-phosphatase 1 (EC 3.1.3.86) (Inositol polyphosphate-5-phosphatase of 145 kDa) (SIP-145) (SH2 domain-containing inositol 5'-phosphatase 1) (SH2 domain-containing inositol phosphatase 1) (SHIP-1) (p150Ship)
Q6P549	Inppl1	SHIP2_MOUSE	TB_24H-MOCK_24H	-0.340913	0.0143461	0.0791077	no	-0.340913	0.0791077	Phosphatidylinositol 3,4,5-trisphosphate 5-phosphatase 2 (EC 3.1.3.86) (AblSH3-binding protein) (Inositol polyphosphate phosphatase-like protein 1) (INPPL-1) (SH2 domain-containing inositol 5'-phosphatase 2) (SH2 domain-containing inositol phosphatase 2) (SHIP-2)
Q7TPD0	Ints3	INT3_MOUSE	TB_24H-MOCK_24H	0.0258503	0.930946	0.973021	no	0.0258503	0.973021	Integrator complex subunit 3 (Int3) (SOSS complex subunit A) (Sensor of single-strand DNA complex subunit A) (SOSS-A) (Sensor of ssDNA subunit A)
Q8CIM8	Ints4	INT4_MOUSE	TB_24H-MOCK_24H	-0.060978	0.933329	0.974291	no	-0.060978	0.974291	Integrator complex subunit 4 (Int4)
Q8VI75	Ipo4	IPO4_MOUSE	TB_24H-MOCK_24H	-0.668827	0.000325324	0.0040106	no	-0.668827	0.0040106	Importin-4 (Imp4) (Importin-4a) (Imp4a) (Ran-binding protein 4) (RanBP4)
Q8BKC5	Ipo5	IPO5_MOUSE	TB_24H-MOCK_24H	-0.244815	0.05278	0.198553	no	-0.244815	0.198553	Importin-5 (Imp5) (Importin subunit beta-3) (Karyopherin beta-3) (Ran-binding protein 5) (RanBP5)
Q9EPL8	Ipo7	IPO7_MOUSE	TB_24H-MOCK_24H	-0.771246	0.0669564	0.234497	no	-0.771246	0.234497	Importin-7 (Imp7) (Ran-binding protein 7) (RanBP7)
Q91YE6	Ipo9	IPO9_MOUSE	TB_24H-MOCK_24H	-0.402569	0.16298	0.417834	no	-0.402569	0.417834	Importin-9 (Imp9) (Importin-9a) (Imp9a) (Importin-9b) (Imp9b) (Ran-binding protein 9) (RanBP9)
Q9JKF1	Iqgap1	IQGA1_MOUSE	TB_24H-MOCK_24H	0.00117205	0.992704	0.996904	no	0.00117205	0.996904	Ras GTPase-activating-like protein IQGAP1
Q3UQ44	Iqgap2	IQGA2_MOUSE	TB_24H-MOCK_24H	-0.00340029	0.984375	0.992839	no	-0.00340029	0.992839	Ras GTPase-activating-like protein IQGAP2
Q8R0S2	Iqsec1	IQEC1_MOUSE	TB_24H-MOCK_24H	0.253468	0.39031	0.671313	no	0.253468	0.671313	IQ motif and SEC7 domain-containing protein 1
Q5DU25	Iqsec2	IQEC2_MOUSE	TB_24H-MOCK_24H	1.09879	0.0286633	0.131445	no	1.09879	0.131445	IQ motif and SEC7 domain-containing protein 2
Q8R4K2	Irak4	IRAK4_MOUSE	TB_24H-MOCK_24H	0.036724	0.810304	0.921296	no	0.036724	0.921296	Interleukin-1 receptor-associated kinase 4 (IRAK-4) (EC 2.7.11.1)
E9Q1P8	Irf2bp2	I2BP2_MOUSE	TB_24H-MOCK_24H	-0.287044	0.376738	0.662888	no	-0.287044	0.662888	Interferon regulatory factor 2-binding protein 2 (IRF-2-binding protein 2) (IRF-2BP2)
Q8K3X4	Irf2bpl	I2BPL_MOUSE	TB_24H-MOCK_24H	0.344101	0.301023	0.587922	no	0.344101	0.587922	Interferon regulatory factor 2-binding protein-like (Enhanced at puberty protein 1)
P70671	Irf3	IRF3_MOUSE	TB_24H-MOCK_24H	-0.162092	0.788972	0.911045	no	-0.162092	0.911045	Interferon regulatory factor 3 (IRF-3)
P56477	Irf5	IRF5_MOUSE	TB_24H-MOCK_24H	0.520856	0.019146	0.098556	no	0.520856	0.098556	Interferon regulatory factor 5 (IRF-5)
Q61179	Irf9	IRF9_MOUSE	TB_24H-MOCK_24H	1.17434	0.00349412	0.0272121	no	1.17434	0.0272121	Interferon regulatory factor 9 (IRF-9) (IFN-alpha-responsive transcription factor subunit) (ISGF3 p48 subunit) (Interferon-stimulated gene factor 3 gamma) (ISGF-3 gamma) (Transcriptional regulator ISGF3 subunit gamma)
Q60766	Irgm1	IRGM1_MOUSE	TB_24H-MOCK_24H	1.0076	4.83509e-08	1.97017e-06	no	1.0076	1.97017e-06	Immunity-related GTPase family M protein 1 (EC 3.6.5.-) (Interferon-inducible GTPase 3) (Interferon-inducible protein 1) (LPS-stimulated RAW 264.7 macrophage protein 47) (LRG-47)
Q8VIM9	Irgq	IRGQ_MOUSE	TB_24H-MOCK_24H	0.252947	0.47008	0.742121	no	0.252947	0.742121	Immunity-related GTPase family Q protein
Q9DCB8	Isca2	ISCA2_MOUSE	TB_24H-MOCK_24H	0.0034333	0.990361	0.996355	no	0.0034333	0.996355	Iron-sulfur cluster assembly 2 homolog, mitochondrial (HESB-like domain-containing protein 1)
Q9D7P6	Iscu	ISCU_MOUSE	TB_24H-MOCK_24H	0.362629	0.147829	0.396566	no	0.362629	0.396566	Iron-sulfur cluster assembly enzyme ISCU, mitochondrial (NifU-like N-terminal domain-containing protein) (NifU-like protein)
Q64339	Isg15	ISG15_MOUSE	TB_24H-MOCK_24H	3.02191	1.62093e-14	2.61442e-12	no	3.02191	2.61442e-12	Ubiquitin-like protein ISG15 (Interferon-induced 15 kDa protein) (Interferon-induced 17 kDa protein) (IP17) (Ubiquitin cross-reactive protein)
Q9JL16	Isg20	ISG20_MOUSE	TB_24H-MOCK_24H	3.87293	0	0	no	3.87293	0	Interferon-stimulated gene 20 kDa protein (EC 3.1.13.1) (Promyelocytic leukemia nuclear body-associated protein ISG20) (Protein DnaQL)
Q3U1G5	Isg20l2	I20L2_MOUSE	TB_24H-MOCK_24H	-0.144987	0.625236	0.830858	no	-0.144987	0.830858	Interferon-stimulated 20 kDa exonuclease-like 2 (EC 3.1.-.-)
Q91V64	Isoc1	ISOC1_MOUSE	TB_24H-MOCK_24H	0.231325	0.279217	0.562207	no	0.231325	0.562207	Isochorismatase domain-containing protein 1
P85094	Isoc2a	ISC2A_MOUSE	TB_24H-MOCK_24H	0.186313	0.232591	0.508965	no	0.186313	0.508965	Isochorismatase domain-containing protein 2A
Q9CX00	Ist1	IST1_MOUSE	TB_24H-MOCK_24H	0.71689	1.90116e-05	0.000367969	no	0.71689	0.000367969	IST1 homolog
Q69ZQ2	Isy1	ISY1_MOUSE	TB_24H-MOCK_24H	0.112173	0.616026	0.825147	no	0.112173	0.825147	Pre-mRNA-splicing factor ISY1 homolog
Q9JHU9	Isyna1	INO1_MOUSE	TB_24H-MOCK_24H	-0.325223	0.0292147	0.132735	no	-0.325223	0.132735	Inositol-3-phosphate synthase 1 (IPS 1) (EC 5.5.1.4) (Myo-inositol 1-phosphate synthase) (MI-1-P synthase) (MIP synthase)
Q8C863	Itch	ITCH_MOUSE	TB_24H-MOCK_24H	-0.0685067	0.760146	0.897933	no	-0.0685067	0.897933	E3 ubiquitin-protein ligase Itchy (EC 2.3.2.26) (HECT-type E3 ubiquitin transferase Itchy homolog)
Q00651	Itga4	ITA4_MOUSE	TB_24H-MOCK_24H	-0.560097	0.0163039	0.0874132	no	-0.560097	0.0874132	Integrin alpha-4 (CD49 antigen-like family member D) (Integrin alpha-IV) (Lymphocyte Peyer patch adhesion molecules subunit alpha) (LPAM subunit alpha) (VLA-4 subunit alpha) (CD antigen CD49d)
P11688	Itga5	ITA5_MOUSE	TB_24H-MOCK_24H	1.04565	4.6157e-06	0.000108947	no	1.04565	0.000108947	Integrin alpha-5 (CD49 antigen-like family member E) (Fibronectin receptor subunit alpha) (Integrin alpha-F) (VLA-5) (CD antigen CD49e) [Cleaved into: Integrin alpha-5 heavy chain; Integrin alpha-5 light chain]
Q61739	Itga6	ITA6_MOUSE	TB_24H-MOCK_24H	-1.59448	1.46549e-14	2.46649e-12	no	-1.59448	2.46649e-12	Integrin alpha-6 (CD49 antigen-like family member F) (VLA-6) (CD antigen CD49f) [Cleaved into: Integrin alpha-6 heavy chain; Integrin alpha-6 light chain]
P24063	Itgal	ITAL_MOUSE	TB_24H-MOCK_24H	1.38666	9.45457e-08	3.5191e-06	no	1.38666	3.5191e-06	Integrin alpha-L (CD11 antigen-like family member A) (Leukocyte adhesion glycoprotein LFA-1 alpha chain) (LFA-1A) (Leukocyte function-associated molecule 1 alpha chain) (Lymphocyte antigen 15) (Ly-15) (CD antigen CD11a)
P05555	Itgam	ITAM_MOUSE	TB_24H-MOCK_24H	0.228025	0.069432	0.240744	no	0.228025	0.240744	Integrin alpha-M (CD11 antigen-like family member B) (CR-3 alpha chain) (Cell surface glycoprotein MAC-1 subunit alpha) (Leukocyte adhesion receptor MO1) (CD antigen CD11b)
P43406	Itgav	ITAV_MOUSE	TB_24H-MOCK_24H	-0.764103	1.16605e-05	0.000241722	no	-0.764103	0.000241722	Integrin alpha-V (Vitronectin receptor subunit alpha) (CD antigen CD51) [Cleaved into: Integrin alpha-V heavy chain; Integrin alpha-V light chain]
P09055	Itgb1	ITB1_MOUSE	TB_24H-MOCK_24H	-0.22988	0.113483	0.337917	no	-0.22988	0.337917	Integrin beta-1 (Fibronectin receptor subunit beta) (VLA-4 subunit beta) (CD antigen CD29)
P11835	Itgb2	ITB2_MOUSE	TB_24H-MOCK_24H	-0.0208432	0.750504	0.891166	no	-0.0208432	0.891166	Integrin beta-2 (Cell surface adhesion glycoproteins LFA-1/CR3/p150,95 subunit beta) (Complement receptor C3 subunit beta) (CD antigen CD18)
O54890	Itgb3	ITB3_MOUSE	TB_24H-MOCK_24H	-0.904599	0.00636631	0.0433873	no	-0.904599	0.0433873	Integrin beta-3 (Platelet membrane glycoprotein IIIa) (GPIIIa) (CD antigen CD61)
O70309	Itgb5	ITB5_MOUSE	TB_24H-MOCK_24H	-0.995683	3.39584e-07	1.0899e-05	no	-0.995683	1.0899e-05	Integrin beta-5
O89051	Itm2b	ITM2B_MOUSE	TB_24H-MOCK_24H	0.426663	0.151994	0.402993	no	0.426663	0.402993	Integral membrane protein 2B (Immature BRI2) (imBRI2) (Protein E25B) (Transmembrane protein BRI) (Bri) [Cleaved into: BRI2, membrane form (Mature BRI2) (mBRI2); BRI2 intracellular domain (BRI2 ICD); BRI2C, soluble form; Bri23 peptide (Bri2-23) (ABri23) (C-terminal peptide) (P23 peptide)]
Q9D892	Itpa	ITPA_MOUSE	TB_24H-MOCK_24H	-0.0755273	0.711647	0.873426	no	-0.0755273	0.873426	Inosine triphosphate pyrophosphatase (ITPase) (Inosine triphosphatase) (EC 3.6.1.9) (Non-canonical purine NTP pyrophosphatase) (Non-standard purine NTP pyrophosphatase) (Nucleoside-triphosphate diphosphatase) (Nucleoside-triphosphate pyrophosphatase) (NTPase)
P70227	Itpr3	ITPR3_MOUSE	TB_24H-MOCK_24H	-0.166929	0.740174	0.887169	no	-0.166929	0.887169	Inositol 1,4,5-trisphosphate receptor type 3 (IP3 receptor isoform 3) (IP3R 3) (InsP3R3) (Type 3 inositol 1,4,5-trisphosphate receptor) (Type 3 InsP3 receptor)
Q9Z0R4	Itsn1	ITSN1_MOUSE	TB_24H-MOCK_24H	-0.233324	0.0978012	0.302387	no	-0.233324	0.302387	Intersectin-1 (EH and SH3 domains protein 1)
Q9Z0R6	Itsn2	ITSN2_MOUSE	TB_24H-MOCK_24H	-0.233324	0.365492	0.653799	no	-0.233324	0.653799	Intersectin-2 (EH domain and SH3 domain regulator of endocytosis 2) (EH and SH3 domains protein 2) (SH3 domain-containing protein 1B)
Q9JHI5	Ivd	IVD_MOUSE	TB_24H-MOCK_24H	-0.0422368	0.657557	0.844246	no	-0.0422368	0.844246	Isovaleryl-CoA dehydrogenase, mitochondrial (IVD) (EC 1.3.8.4)
Q5XKN4	Jagn1	JAGN1_MOUSE	TB_24H-MOCK_24H	-0.280714	0.22593	0.501477	no	-0.280714	0.501477	Protein jagunal homolog 1
P52332	Jak1	JAK1_MOUSE	TB_24H-MOCK_24H	-0.177683	0.510782	0.770414	no	-0.177683	0.770414	Tyrosine-protein kinase JAK1 (EC 2.7.10.2) (Janus kinase 1) (JAK-1)
O88824	Jtb	JTB_MOUSE	TB_24H-MOCK_24H	-0.210166	0.270981	0.555302	no	-0.210166	0.555302	Protein JTB
P09450	Junb	JUNB_MOUSE	TB_24H-MOCK_24H	1.8327	1.90465e-08	8.77725e-07	no	1.8327	8.77725e-07	Transcription factor jun-B (MyD21)
Q8BX02	Kank2	KANK2_MOUSE	TB_24H-MOCK_24H	-0.639791	0.0322733	0.141547	no	-0.639791	0.141547	KN motif and ankyrin repeat domain-containing protein 2 (Ankyrin repeat domain-containing protein 25)
Q99MN1	Kars	SYK_MOUSE	TB_24H-MOCK_24H	-0.0391165	0.85875	0.943041	no	-0.0391165	0.943041	Lysine--tRNA ligase (EC 6.1.1.6) (Lysyl-tRNA synthetase) (LysRS)
Q80UY2	Kcmf1	KCMF1_MOUSE	TB_24H-MOCK_24H	-0.369467	0.146101	0.393568	no	-0.369467	0.393568	E3 ubiquitin-protein ligase KCMF1 (EC 6.3.2.-) (Differentially expressed in branching tubulogenesis 91) (Debt-91)
P62482	Kcnab2	KCAB2_MOUSE	TB_24H-MOCK_24H	-0.116679	0.371356	0.658175	no	-0.116679	0.658175	Voltage-gated potassium channel subunit beta-2 (EC 1.1.1.-) (K(+) channel subunit beta-2) (Kv-beta-2) (Neuroimmune protein F5)
O89109	Kcnn4	KCNN4_MOUSE	TB_24H-MOCK_24H	-0.579408	0.386772	0.669623	no	-0.579408	0.669623	Intermediate conductance calcium-activated potassium channel protein 4 (SK4) (SKCa 4) (SKCa4) (IK1) (KCa3.1) (KCa4)
Q6WVG3	Kctd12	KCD12_MOUSE	TB_24H-MOCK_24H	0.786876	2.03583e-05	0.000392074	no	0.786876	0.000392074	BTB/POZ domain-containing protein KCTD12 (Pfetin) (Predominantly fetal expressed T1 domain)
Q5DTY9	Kctd16	KCD16_MOUSE	TB_24H-MOCK_24H	1.18343	0.0177554	0.0930055	no	1.18343	0.0930055	BTB/POZ domain-containing protein KCTD16
Q6ZQ88	Kdm1a	KDM1A_MOUSE	TB_24H-MOCK_24H	-0.368335	0.119229	0.348328	no	-0.368335	0.348328	Lysine-specific histone demethylase 1A (EC 1.-.-.-) (BRAF35-HDAC complex protein BHC110) (Flavin-containing amine oxidase domain-containing protein 2)
Q6ZPY7	Kdm3b	KDM3B_MOUSE	TB_24H-MOCK_24H	-1.25457	0.000177448	0.00242788	no	-1.25457	0.00242788	Lysine-specific demethylase 3B (EC 1.14.11.-) (JmjC domain-containing histone demethylation protein 2B) (Jumonji domain-containing protein 1B)
Q6GV12	Kdsr	KDSR_MOUSE	TB_24H-MOCK_24H	-0.387452	0.0982196	0.303196	no	-0.387452	0.303196	3-ketodihydrosphingosine reductase (KDS reductase) (EC 1.1.1.102) (3-dehydrosphinganine reductase) (Follicular variant translocation protein 1 homolog) (FVT-1)
Q9Z2X8	Keap1	KEAP1_MOUSE	TB_24H-MOCK_24H	1.411	0.000430065	0.0050144	no	1.411	0.0050144	Kelch-like ECH-associated protein 1 (Cytosolic inhibitor of Nrf2) (INrf2)
Q60749	Khdrbs1	KHDR1_MOUSE	TB_24H-MOCK_24H	-0.087601	0.733731	0.883452	no	-0.087601	0.883452	KH domain-containing, RNA-binding, signal transduction-associated protein 1 (GAP-associated tyrosine phosphoprotein p62) (Src-associated in mitosis 68 kDa protein) (Sam68) (p21 Ras GTPase-activating protein-associated p62) (p68)
Q3U0V1	Khsrp	FUBP2_MOUSE	TB_24H-MOCK_24H	-0.359292	0.474782	0.746379	no	-0.359292	0.746379	Far upstream element-binding protein 2 (FUSE-binding protein 2) (KH type-splicing regulatory protein) (KSRP)
Q8C2E7	Kiaa0196	STRUM_MOUSE	TB_24H-MOCK_24H	-0.0446804	0.766719	0.902118	no	-0.0446804	0.902118	WASH complex subunit strumpellin
Q3UMB9	Kiaa1033	WASH7_MOUSE	TB_24H-MOCK_24H	-0.170408	0.38467	0.668338	no	-0.170408	0.668338	WASH complex subunit SWIP
A2AIV2	Kiaa1429	VIR_MOUSE	TB_24H-MOCK_24H	0.750313	0.0749881	0.254185	no	0.750313	0.254185	Protein virilizer homolog
A2A7S8	Kiaa1522	K1522_MOUSE	TB_24H-MOCK_24H	-0.0049285	0.991866	0.996904	no	-0.0049285	0.996904	Uncharacterized protein KIAA1522
Q91X21	Kiaa2013	K2013_MOUSE	TB_24H-MOCK_24H	0.196944	0.491373	0.759219	no	0.196944	0.759219	Uncharacterized protein KIAA2013
Q6P9P6	Kif11	KIF11_MOUSE	TB_24H-MOCK_24H	-0.579491	0.0566061	0.209486	no	-0.579491	0.209486	Kinesin-like protein KIF11 (Kinesin-related motor protein Eg5)
Q9EQW7	Kif13a	KI13A_MOUSE	TB_24H-MOCK_24H	-0.00454086	0.983217	0.992839	no	-0.00454086	0.992839	Kinesin-like protein KIF13A
B1AVY7	Kif16b	KI16B_MOUSE	TB_24H-MOCK_24H	-0.154113	0.638059	0.83692	no	-0.154113	0.83692	Kinesin-like protein KIF16B
Q60575	Kif1b	KIF1B_MOUSE	TB_24H-MOCK_24H	0.214084	0.424115	0.704238	no	0.214084	0.704238	Kinesin-like protein KIF1B
Q6ZPU9	Kif1bp	KBP_MOUSE	TB_24H-MOCK_24H	-0.0756403	0.619256	0.827354	no	-0.0756403	0.827354	KIF1-binding protein
P28740	Kif2a	KIF2A_MOUSE	TB_24H-MOCK_24H	-0.375546	0.140022	0.386058	no	-0.375546	0.386058	Kinesin-like protein KIF2A (Kinesin-2)
P28741	Kif3a	KIF3A_MOUSE	TB_24H-MOCK_24H	0.129601	0.632948	0.834801	no	0.129601	0.834801	Kinesin-like protein KIF3A (Microtubule plus end-directed kinesin motor 3A)
Q61771	Kif3b	KIF3B_MOUSE	TB_24H-MOCK_24H	0.560222	0.0187287	0.096794	no	0.560222	0.096794	Kinesin-like protein KIF3B (Microtubule plus end-directed kinesin motor 3B) [Cleaved into: Kinesin-like protein KIF3B, N-terminally processed]
Q61768	Kif5b	KINH_MOUSE	TB_24H-MOCK_24H	0.00740369	0.949553	0.979474	no	0.00740369	0.979474	Kinesin-1 heavy chain (Conventional kinesin heavy chain) (Ubiquitous kinesin heavy chain) (UKHC)
P70188	Kifap3	KIFA3_MOUSE	TB_24H-MOCK_24H	0.299368	0.160058	0.41478	no	0.299368	0.41478	Kinesin-associated protein 3 (KAP-3) (KAP3)
O88447	Klc1	KLC1_MOUSE	TB_24H-MOCK_24H	-0.00516765	0.976568	0.992839	no	-0.00516765	0.992839	Kinesin light chain 1 (KLC 1)
O88448	Klc2	KLC2_MOUSE	TB_24H-MOCK_24H	0.589479	0.0122204	0.0712429	no	0.589479	0.0712429	Kinesin light chain 2 (KLC 2)
Q9DBS5	Klc4	KLC4_MOUSE	TB_24H-MOCK_24H	0.272027	0.222663	0.496502	no	0.272027	0.496502	Kinesin light chain 4 (KLC 4) (Kinesin-like protein 8)
Q9JJZ6	Klf13	KLF13_MOUSE	TB_24H-MOCK_24H	0.221722	0.684887	0.85827	no	0.221722	0.85827	Krueppel-like factor 13 (Basic transcription element-binding protein 3) (BTE-binding protein 3) (Erythroid transcription factor FKLF-2) (RANTES factor of late activated T-lymphocytes 1) (RFLAT-1) (Transcription factor BTEB3)
Q921I2	Klhdc4	KLDC4_MOUSE	TB_24H-MOCK_24H	0.230522	0.333702	0.62062	no	0.230522	0.62062	Kelch domain-containing protein 4
O08550	Kmt2b	KMT2B_MOUSE	TB_24H-MOCK_24H	-0.0759245	0.763804	0.90062	no	-0.0759245	0.90062	Histone-lysine N-methyltransferase 2B (Lysine N-methyltransferase 2B) (EC 2.1.1.43) (Myeloid/lymphoid or mixed-lineage leukemia protein 4 homolog) (Trithorax homolog 2) (WW domain-binding protein 7) (WBP-7)
Q60960	Kpna1	IMA5_MOUSE	TB_24H-MOCK_24H	-0.355907	0.272783	0.557814	no	-0.355907	0.557814	Importin subunit alpha-5 (Importin alpha-S1) (Karyopherin subunit alpha-1) (Nucleoprotein interactor 1) (NPI-1) (RAG cohort protein 2) (SRP1-beta) [Cleaved into: Importin subunit alpha-5, N-terminally processed]
P52293	Kpna2	IMA1_MOUSE	TB_24H-MOCK_24H	-3.70415	4.44089e-16	9.04773e-14	no	-3.70415	9.04773e-14	Importin subunit alpha-1 (Importin alpha P1) (Karyopherin subunit alpha-2) (Pendulin) (Pore targeting complex 58 kDa subunit) (PTAC58) (RAG cohort protein 1) (SRP1-alpha)
O35344	Kpna3	IMA4_MOUSE	TB_24H-MOCK_24H	-0.171022	0.545145	0.786529	no	-0.171022	0.786529	Importin subunit alpha-4 (Importin alpha Q2) (Qip2) (Karyopherin subunit alpha-3)
O35343	Kpna4	IMA3_MOUSE	TB_24H-MOCK_24H	0.220544	0.0860126	0.277231	no	0.220544	0.277231	Importin subunit alpha-3 (Importin alpha Q1) (Qip1) (Karyopherin subunit alpha-4)
O35345	Kpna6	IMA7_MOUSE	TB_24H-MOCK_24H	-0.115654	0.748611	0.891166	no	-0.115654	0.891166	Importin subunit alpha-7 (Importin alpha-S2) (Karyopherin subunit alpha-6)
P70168	Kpnb1	IMB1_MOUSE	TB_24H-MOCK_24H	-0.338106	0.00247063	0.0207909	no	-0.338106	0.0207909	Importin subunit beta-1 (Karyopherin subunit beta-1) (Nuclear factor p97) (Pore targeting complex 97 kDa subunit) (PTAC97) (SCG)
Q8BGA5	Krr1	KRR1_MOUSE	TB_24H-MOCK_24H	-0.509535	0.11326	0.337713	no	-0.509535	0.337713	KRR1 small subunit processome component homolog (HIV-1 Rev-binding protein 2 homolog) (KRR-R motif-containing protein 1)
Q61595	Ktn1	KTN1_MOUSE	TB_24H-MOCK_24H	0.0942209	0.717312	0.877042	no	0.0942209	0.877042	Kinectin
Q8BZT9	Lacc1	LACC1_MOUSE	TB_24H-MOCK_24H	1.1666	0.00106844	0.0107148	no	1.1666	0.0107148	Laccase domain-containing protein 1
Q3V384	Lace1	LACE1_MOUSE	TB_24H-MOCK_24H	0.402078	0.369502	0.65751	no	0.402078	0.65751	Lactation elevated protein 1
Q9EP89	Lactb	LACTB_MOUSE	TB_24H-MOCK_24H	0.114697	0.518698	0.772261	no	0.114697	0.772261	Serine beta-lactamase-like protein LACTB, mitochondrial (EC 3.4.-.-)
Q99KR3	Lactb2	LACB2_MOUSE	TB_24H-MOCK_24H	-1.01004	0.0295015	0.133724	no	-1.01004	0.133724	Endoribonuclease LACTB2 (Beta-lactamase-like protein 2) (EC 3.1.27.-)
Q9CR70	Lage3	LAGE3_MOUSE	TB_24H-MOCK_24H	-0.552941	0.000557209	0.00621601	no	-0.552941	0.00621601	EKC/KEOPS complex subunit Lage3 (ITBA2 protein homolog) (L antigen family member 3)
Q8BG84	Lair1	LAIR1_MOUSE	TB_24H-MOCK_24H	-0.502352	0.0174607	0.0918346	no	-0.502352	0.0918346	Leukocyte-associated immunoglobulin-like receptor 1 (LAIR-1) (mLAIR1) (CD antigen CD305)
P11438	Lamp1	LAMP1_MOUSE	TB_24H-MOCK_24H	0.299964	0.156544	0.40917	no	0.299964	0.40917	Lysosome-associated membrane glycoprotein 1 (LAMP-1) (Lysosome-associated membrane protein 1) (120 kDa lysosomal membrane glycoprotein) (CD107 antigen-like family member A) (LGP-120) (Lysosomal membrane glycoprotein A) (LGP-A) (P2B) (CD antigen CD107a)
P17047	Lamp2	LAMP2_MOUSE	TB_24H-MOCK_24H	0.730834	0.00682435	0.0450035	no	0.730834	0.0450035	Lysosome-associated membrane glycoprotein 2 (LAMP-2) (Lysosome-associated membrane protein 2) (CD107 antigen-like family member B) (Lysosomal membrane glycoprotein type B) (LGP-B) (CD antigen CD107b)
Q9CQ22	Lamtor1	LTOR1_MOUSE	TB_24H-MOCK_24H	-0.156723	0.100669	0.308787	no	-0.156723	0.308787	Ragulator complex protein LAMTOR1 (Late endosomal/lysosomal adaptor and MAPK and MTOR activator 1) (Lipid raft adaptor protein p18)
Q9JHS3	Lamtor2	LTOR2_MOUSE	TB_24H-MOCK_24H	0.115789	0.670973	0.851048	no	0.115789	0.851048	Ragulator complex protein LAMTOR2 (Endosomal adaptor protein p14) (Late endosomal/lysosomal Mp1-interacting protein) (Late endosomal/lysosomal adaptor and MAPK and MTOR activator 2) (Mitogen-activated protein-binding protein-interacting protein) (Roadblock domain-containing protein 3)
O88653	Lamtor3	LTOR3_MOUSE	TB_24H-MOCK_24H	-0.263935	0.236829	0.516197	no	-0.263935	0.516197	Ragulator complex protein LAMTOR3 (Late endosomal/lysosomal adaptor and MAPK and MTOR activator 3) (MEK-binding partner 1) (Mp1) (Mitogen-activated protein kinase kinase 1-interacting protein 1) (Mitogen-activated protein kinase scaffold protein 1)
Q8CF66	Lamtor4	LTOR4_MOUSE	TB_24H-MOCK_24H	-0.398005	0.249977	0.531681	no	-0.398005	0.531681	Ragulator complex protein LAMTOR4 (Late endosomal/lysosomal adaptor and MAPK and MTOR activator 4) [Cleaved into: Ragulator complex protein LAMTOR4, N-terminally processed]
Q9D1L9	Lamtor5	LTOR5_MOUSE	TB_24H-MOCK_24H	-0.265531	0.599775	0.81524	no	-0.265531	0.81524	Ragulator complex protein LAMTOR5 (Late endosomal/lysosomal adaptor and MAPK and MTOR activator 5)
O89112	Lancl1	LANC1_MOUSE	TB_24H-MOCK_24H	-0.640264	0.021813	0.108513	no	-0.640264	0.108513	LanC-like protein 1 (40 kDa erythrocyte membrane protein) (p40)
Q9JJK2	Lancl2	LANC2_MOUSE	TB_24H-MOCK_24H	-0.252707	0.512725	0.771211	no	-0.252707	0.771211	LanC-like protein 2 (Testis-specific adriamycin sensitivity protein)
Q9CPY7	Lap3	AMPL_MOUSE	TB_24H-MOCK_24H	0.243679	0.348924	0.637408	no	0.243679	0.637408	Cytosol aminopeptidase (EC 3.4.11.1) (Leucine aminopeptidase 3) (LAP-3) (Leucyl aminopeptidase) (Proline aminopeptidase) (EC 3.4.11.5) (Prolyl aminopeptidase)
Q61168	Laptm5	LAPM5_MOUSE	TB_24H-MOCK_24H	#NUM!		0	yes	-2.25926	0.0233236	Lysosomal-associated transmembrane protein 5 (Lysosomal-associated multitransmembrane protein 5) (Retinoic acid-inducible E3 protein)
Q6ZQ58	Larp1	LARP1_MOUSE	TB_24H-MOCK_24H	0.109284	0.635355	0.836409	no	0.109284	0.836409	La-related protein 1 (La ribonucleoprotein domain family member 1)
Q8BWW4	Larp4	LARP4_MOUSE	TB_24H-MOCK_24H	-0.360562	0.292479	0.576075	no	-0.360562	0.576075	La-related protein 4 (La ribonucleoprotein domain family member 4)
Q6A0A2	Larp4b	LAR4B_MOUSE	TB_24H-MOCK_24H	-0.217446	0.214268	0.484619	no	-0.217446	0.484619	La-related protein 4B (La ribonucleoprotein domain family member 4B) (La ribonucleoprotein domain family member 5) (La-related protein 5)
Q05CL8	Larp7	LARP7_MOUSE	TB_24H-MOCK_24H	-0.789511	0.00659669	0.0439514	no	-0.789511	0.0439514	La-related protein 7 (La ribonucleoprotein domain family member 7)
Q8BMJ2	Lars	SYLC_MOUSE	TB_24H-MOCK_24H	-0.207111	0.201456	0.470295	no	-0.207111	0.470295	Leucine--tRNA ligase, cytoplasmic (EC 6.1.1.4) (Leucyl-tRNA synthetase) (LeuRS)
Q8VDC0	Lars2	SYLM_MOUSE	TB_24H-MOCK_24H	-0.500925	0.199589	0.469424	no	-0.500925	0.469424	Probable leucine--tRNA ligase, mitochondrial (EC 6.1.1.4) (Leucyl-tRNA synthetase) (LeuRS)
A2BE28	Las1l	LAS1L_MOUSE	TB_24H-MOCK_24H	-0.353515	0.21264	0.482126	no	-0.353515	0.482126	Ribosomal biogenesis protein LAS1L (Protein LAS1 homolog)
Q61792	Lasp1	LASP1_MOUSE	TB_24H-MOCK_24H	0.228428	0.707723	0.872317	no	0.228428	0.872317	LIM and SH3 domain protein 1 (LASP-1) (Metastatic lymph node gene 50 protein) (MLN 50)
Q9JHL0	Lat2	NTAL_MOUSE	TB_24H-MOCK_24H	-0.470436	0.0156356	0.0847693	no	-0.470436	0.0847693	Linker for activation of T-cells family member 2 (Linker for activation of B-cells) (Membrane-associated adapter molecule) (Non-T-cell activation linker) (Williams-Beuren syndrome chromosomal region 15 protein homolog)
Q3U9G9	Lbr	LBR_MOUSE	TB_24H-MOCK_24H	-0.0342808	0.863448	0.945064	no	-0.0342808	0.945064	Lamin-B receptor (Integral nuclear envelope inner membrane protein)
Q61233	Lcp1	PLSL_MOUSE	TB_24H-MOCK_24H	-0.0727208	0.537857	0.781549	no	-0.0727208	0.781549	Plastin-2 (65 kDa macrophage protein) (L-plastin) (Lymphocyte cytosolic protein 1) (LCP-1) (pp65)
Q60787	Lcp2	LCP2_MOUSE	TB_24H-MOCK_24H	0.963571	0.0447672	0.178103	no	0.963571	0.178103	Lymphocyte cytosolic protein 2 (SH2 domain-containing leukocyte protein of 76 kDa) (SLP-76 tyrosine phosphoprotein) (SLP76)
Q8BVA5	Ldah	LDAH_MOUSE	TB_24H-MOCK_24H	-0.0291181	0.931044	0.973021	no	-0.0291181	0.973021	Lipid droplet-associated hydrolase (EC 3.1.1.-) (Lipid droplet-associated serine hydrolase) (mLDAH)
P06151	Ldha	LDHA_MOUSE	TB_24H-MOCK_24H	0.0837043	0.456297	0.732326	no	0.0837043	0.732326	L-lactate dehydrogenase A chain (LDH-A) (EC 1.1.1.27) (LDH muscle subunit) (LDH-M)
P16125	Ldhb	LDHB_MOUSE	TB_24H-MOCK_24H	-0.40281	0.459184	0.733898	no	-0.40281	0.733898	L-lactate dehydrogenase B chain (LDH-B) (EC 1.1.1.27) (LDH heart subunit) (LDH-H)
P35951	Ldlr	LDLR_MOUSE	TB_24H-MOCK_24H	-1.01435	0.012498	0.0722509	no	-1.01435	0.0722509	Low-density lipoprotein receptor (LDL receptor)
Q6DVA0	Lemd2	LEMD2_MOUSE	TB_24H-MOCK_24H	0.308878	0.0354065	0.150614	no	0.308878	0.150614	LEM domain-containing protein 2 (Nuclear envelope transmembrane protein 25) (NET25)
Q9WU40	Lemd3	MAN1_MOUSE	TB_24H-MOCK_24H	-0.211901	0.185924	0.452577	no	-0.211901	0.452577	Inner nuclear membrane protein Man1 (LEM domain-containing protein 3)
Q9Z2I0	Letm1	LETM1_MOUSE	TB_24H-MOCK_24H	0.09178	0.649063	0.840067	no	0.09178	0.840067	LETM1 and EF-hand domain-containing protein 1, mitochondrial (Leucine zipper-EF-hand-containing transmembrane protein 1)
Q924L1	Letmd1	LTMD1_MOUSE	TB_24H-MOCK_24H	0.00875286	0.981901	0.992839	no	0.00875286	0.992839	LETM1 domain-containing protein 1 (Cervical cancer receptor) (MCC-32)
P16045	Lgals1	LEG1_MOUSE	TB_24H-MOCK_24H	-0.440184	0.142662	0.388806	no	-0.440184	0.388806	Galectin-1 (Gal-1) (14 kDa lectin) (Beta-galactoside-binding lectin L-14-I) (Galaptin) (Lactose-binding lectin 1) (Lectin galactoside-binding soluble 1) (S-Lac lectin 1)
P16110	Lgals3	LEG3_MOUSE	TB_24H-MOCK_24H	-0.684686	0.00029218	0.00375757	no	-0.684686	0.00375757	Galectin-3 (Gal-3) (35 kDa lectin) (Carbohydrate-binding protein 35) (CBP 35) (Galactose-specific lectin 3) (IgE-binding protein) (L-34 galactoside-binding lectin) (Laminin-binding protein) (Lectin L-29) (Mac-2 antigen)
Q07797	Lgals3bp	LG3BP_MOUSE	TB_24H-MOCK_24H	1.43522	0.000303954	0.00386391	no	1.43522	0.00386391	Galectin-3-binding protein (Cyp-C-associated protein) (CyCAP) (Lectin galactoside-binding soluble 3-binding protein) (Protein MAMA)
Q9JL15	Lgals8	LEG8_MOUSE	TB_24H-MOCK_24H	1.41209	0.000345414	0.00421797	no	1.41209	0.00421797	Galectin-8 (Gal-8) (LGALS-8)
O08573	Lgals9	LEG9_MOUSE	TB_24H-MOCK_24H	1.20468	1.33121e-07	4.72761e-06	no	1.20468	4.72761e-06	Galectin-9 (Gal-9)
O89017	Lgmn	LGMN_MOUSE	TB_24H-MOCK_24H	0.917677	0.108615	0.326436	no	0.917677	0.326436	Legumain (EC 3.4.22.34) (Asparaginyl endopeptidase) (Protease, cysteine 1)
Q9D7I5	Lhpp	LHPP_MOUSE	TB_24H-MOCK_24H	-0.682521	0.0440432	0.175764	no	-0.682521	0.175764	Phospholysine phosphohistidine inorganic pyrophosphate phosphatase (EC 3.1.3.-) (EC 3.6.1.1)
P37913	Lig1	DNLI1_MOUSE	TB_24H-MOCK_24H	-2.82304	4.4631e-14	6.64486e-12	no	-2.82304	6.64486e-12	DNA ligase 1 (EC 6.5.1.1) (DNA ligase I) (Polydeoxyribonucleotide synthase [ATP] 1)
P97484	Lilrb3	LIRB3_MOUSE	TB_24H-MOCK_24H	1.3453	3.48238e-06	8.58618e-05	no	1.3453	8.58618e-05	Leukocyte immunoglobulin-like receptor subfamily B member 3 (LIR-3) (Leukocyte immunoglobulin-like receptor 3) (Cell-surface glycoprotein p91) (Paired immunoglobulin-like receptor B) (PIR-B)
Q64281	Lilrb4	LIRB4_MOUSE	TB_24H-MOCK_24H	1.66195	3.31478e-08	1.39639e-06	no	1.66195	1.39639e-06	Leukocyte immunoglobulin-like receptor subfamily B member 4 (Mast cell surface glycoprotein Gp49B) (CD antigen CD85k)
Q9ERG0	Lima1	LIMA1_MOUSE	TB_24H-MOCK_24H	-0.208802	0.52068	0.773428	no	-0.208802	0.773428	LIM domain and actin-binding protein 1 (Epithelial protein lost in neoplasm) (mEPLIN)
Q9QXD8	Limd1	LIMD1_MOUSE	TB_24H-MOCK_24H	-0.81427	0.0323608	0.141547	no	-0.81427	0.141547	LIM domain-containing protein 1
Q8BGB5	Limd2	LIMD2_MOUSE	TB_24H-MOCK_24H	0.455786	0.23784	0.517236	no	0.455786	0.517236	LIM domain-containing protein 2
Q99JW4	Lims1	LIMS1_MOUSE	TB_24H-MOCK_24H	0.0764697	0.868046	0.945926	no	0.0764697	0.945926	LIM and senescent cell antigen-like-containing domain protein 1 (Particularly interesting new Cys-His protein 1) (PINCH-1)
Q9Z0M5	Lipa	LICH_MOUSE	TB_24H-MOCK_24H	0.00340729	0.991142	0.996548	no	0.00340729	0.996548	Lysosomal acid lipase/cholesteryl ester hydrolase (Acid cholesteryl ester hydrolase) (LAL) (EC 3.1.1.13) (Cholesteryl esterase) (Lipase A) (Sterol esterase)
Q80Y17	Llgl1	L2GL1_MOUSE	TB_24H-MOCK_24H	-0.28117	0.304026	0.591251	no	-0.28117	0.591251	Lethal(2) giant larvae protein homolog 1 (LLGL) (Mgl-1) (Mlgl)
Q9D0F3	Lman1	LMAN1_MOUSE	TB_24H-MOCK_24H	-0.14898	0.385445	0.669159	no	-0.14898	0.669159	Protein ERGIC-53 (ER-Golgi intermediate compartment 53 kDa protein) (Lectin mannose-binding 1) (p58)
Q9DBH5	Lman2	LMAN2_MOUSE	TB_24H-MOCK_24H	-0.156358	0.542031	0.783789	no	-0.156358	0.783789	Vesicular integral-membrane protein VIP36 (Lectin mannose-binding 2) (Vesicular integral-membrane protein 36) (VIP36)
Q8K0B2	Lmbrd1	LMBD1_MOUSE	TB_24H-MOCK_24H	0.318751	0.397371	0.677631	no	0.318751	0.677631	Probable lysosomal cobalamin transporter (LMBR1 domain-containing protein 1) (Protein N90b)
Q8C3X8	Lmf2	LMF2_MOUSE	TB_24H-MOCK_24H	0.425082	0.148848	0.398472	no	0.425082	0.398472	Lipase maturation factor 2 (Transmembrane protein 112B) (Transmembrane protein 153)
P48678	Lmna	LMNA_MOUSE	TB_24H-MOCK_24H	-0.0552824	0.51113	0.770414	no	-0.0552824	0.770414	Prelamin-A/C [Cleaved into: Lamin-A/C]
P14733	Lmnb1	LMNB1_MOUSE	TB_24H-MOCK_24H	-0.145971	0.0562166	0.208244	no	-0.145971	0.208244	Lamin-B1
P21619	Lmnb2	LMNB2_MOUSE	TB_24H-MOCK_24H	-0.290394	0.00665258	0.0442477	no	-0.290394	0.0442477	Lamin-B2
Q7TQ95	Lnp	LNP_MOUSE	TB_24H-MOCK_24H	-0.514903	0.0404607	0.164867	no	-0.514903	0.164867	Protein lunapark (Protein ulnaless)
Q8C129	Lnpep	LCAP_MOUSE	TB_24H-MOCK_24H	0.221883	0.126693	0.359951	no	0.221883	0.359951	Leucyl-cystinyl aminopeptidase (Cystinyl aminopeptidase) (EC 3.4.11.3) (Oxytocinase) (OTase)
Q8CGK3	Lonp1	LONM_MOUSE	TB_24H-MOCK_24H	0.0790183	0.395274	0.676279	no	0.0790183	0.676279	Lon protease homolog, mitochondrial (EC 3.4.21.-) (Lon protease-like protein) (LONP) (Mitochondrial ATP-dependent protease Lon) (Serine protease 15)
Q3TFD2	Lpcat1	PCAT1_MOUSE	TB_24H-MOCK_24H	-0.95211	0.0706535	0.243111	no	-0.95211	0.243111	Lysophosphatidylcholine acyltransferase 1 (LPC acyltransferase 1) (LPCAT-1) (LysoPC acyltransferase 1) (mLPCAT1) (EC 2.3.1.23) (1-acylglycerophosphocholine O-acyltransferase) (1-alkylglycerophosphocholine O-acetyltransferase) (EC 2.3.1.67) (Acetyl-CoA:lyso-platelet-activating factor acetyltransferase) (Acetyl-CoA:lyso-PAF acetyltransferase) (Lyso-PAF acetyltransferase) (LysoPAFAT) (Acyltransferas…
Q8BYI6	Lpcat2	PCAT2_MOUSE	TB_24H-MOCK_24H	1.47194	6.76797e-06	0.000150568	no	1.47194	0.000150568	Lysophosphatidylcholine acyltransferase 2 (LPC acyltransferase 2) (LPCAT-2) (LysoPC acyltransferase 2) (EC 2.3.1.23) (1-acylglycerol-3-phosphate O-acyltransferase 11) (1-AGP acyltransferase 11) (1-AGPAT 11) (EC 2.3.1.51) (1-acylglycerophosphocholine O-acyltransferase) (1-alkylglycerophosphocholine O-acetyltransferase) (EC 2.3.1.67) (Acetyl-CoA:lyso-platelet-activating factor acetyltransferase) (A…
Q91V01	Lpcat3	MBOA5_MOUSE	TB_24H-MOCK_24H	0.111485	0.574982	0.802201	no	0.111485	0.802201	Lysophospholipid acyltransferase 5 (LPLAT 5) (EC 2.3.1.-) (1-acylglycerophosphocholine O-acyltransferase) (EC 2.3.1.23) (1-acylglycerophosphoethanolamine O-acyltransferase) (EC 2.3.1.n7) (1-acylglycerophosphoserine O-acyltransferase) (EC 2.3.1.n6) (Lysophosphatidylcholine acyltransferase) (LPCAT) (Lyso-PC acyltransferase) (Lysophosphatidylcholine acyltransferase 3) (Lyso-PC acyltransferase 3) (mL…
P11152	Lpl	LIPL_MOUSE	TB_24H-MOCK_24H	-4.18977	0	0	no	-4.18977	0	Lipoprotein lipase (LPL) (EC 3.1.1.34)
Q8BFW7	Lpp	LPP_MOUSE	TB_24H-MOCK_24H	0.03946	0.91976	0.967497	no	0.03946	0.967497	Lipoma-preferred partner homolog
Q99N69	Lpxn	LPXN_MOUSE	TB_24H-MOCK_24H	-0.135706	0.728934	0.882087	no	-0.135706	0.882087	Leupaxin
P62046	Lrch1	LRCH1_MOUSE	TB_24H-MOCK_24H	0.714133	0.00806454	0.0517709	no	0.714133	0.0517709	Leucine-rich repeat and calponin homology domain-containing protein 1 (Calponin homology domain-containing protein 1)
Q8BVU0	Lrch3	LRCH3_MOUSE	TB_24H-MOCK_24H	0.221829	0.312182	0.59893	no	0.221829	0.59893	Leucine-rich repeat and calponin homology domain-containing protein 3
Q921G6	Lrch4	LRCH4_MOUSE	TB_24H-MOCK_24H	-0.188059	0.276969	0.561333	no	-0.188059	0.561333	Leucine-rich repeat and calponin homology domain-containing protein 4
Q60664	Lrmp	LRMP_MOUSE	TB_24H-MOCK_24H	0.0790466	0.851025	0.939136	no	0.0790466	0.939136	Lymphoid-restricted membrane protein (Protein Jaw1) [Cleaved into: Processed lymphoid-restricted membrane protein]
Q91ZX7	Lrp1	LRP1_MOUSE	TB_24H-MOCK_24H	-1.40283	8.05882e-11	6.36647e-09	no	-1.40283	6.36647e-09	Prolow-density lipoprotein receptor-related protein 1 (LRP-1) (Alpha-2-macroglobulin receptor) (A2MR) (CD antigen CD91) [Cleaved into: Low-density lipoprotein receptor-related protein 1 85 kDa subunit (LRP-85); Low-density lipoprotein receptor-related protein 1 515 kDa subunit (LRP-515); Low-density lipoprotein receptor-related protein 1 intracellular domain (LRPICD)]
P55302	Lrpap1	AMRP_MOUSE	TB_24H-MOCK_24H	-0.349046	0.0194959	0.100224	no	-0.349046	0.100224	Alpha-2-macroglobulin receptor-associated protein (Alpha-2-MRAP) (Heparin-binding protein 44) (HBP-44) (Low density lipoprotein receptor-related protein-associated protein 1) (RAP)
Q6PB66	Lrpprc	LPPRC_MOUSE	TB_24H-MOCK_24H	-0.838396	2.20427e-05	0.000422413	no	-0.838396	0.000422413	Leucine-rich PPR motif-containing protein, mitochondrial (130 kDa leucine-rich protein) (LRP 130) (mLRP130)
Q8K1T1	Lrrc25	LRC25_MOUSE	TB_24H-MOCK_24H	0.856973	6.33185e-05	0.00105649	no	0.856973	0.00105649	Leucine-rich repeat-containing protein 25 (Monocyte and plasmacytoid-activated protein)
Q9CRC8	Lrrc40	LRC40_MOUSE	TB_24H-MOCK_24H	-0.286788	0.470781	0.742747	no	-0.286788	0.742747	Leucine-rich repeat-containing protein 40
Q505F5	Lrrc47	LRC47_MOUSE	TB_24H-MOCK_24H	-0.161273	0.19815	0.467136	no	-0.161273	0.467136	Leucine-rich repeat-containing protein 47
Q9D1G5	Lrrc57	LRC57_MOUSE	TB_24H-MOCK_24H	-0.584935	0.10146	0.310499	no	-0.584935	0.310499	Leucine-rich repeat-containing protein 57
Q3UGP9	Lrrc58	LRC58_MOUSE	TB_24H-MOCK_24H	-0.747161	0.00197825	0.0176447	no	-0.747161	0.0176447	Leucine-rich repeat-containing protein 58
Q922Q8	Lrrc59	LRC59_MOUSE	TB_24H-MOCK_24H	0.0611118	0.700972	0.869421	no	0.0611118	0.869421	Leucine-rich repeat-containing protein 59
Q3UZ39	Lrrfip1	LRRF1_MOUSE	TB_24H-MOCK_24H	-0.0631463	0.837532	0.932438	no	-0.0631463	0.932438	Leucine-rich repeat flightless-interacting protein 1 (LRR FLII-interacting protein 1) (FLI-LRR-associated protein 1) (Flap-1) (H186 FLAP)
Q91WK0	Lrrfip2	LRRF2_MOUSE	TB_24H-MOCK_24H	0.483818	0.149873	0.399832	no	0.483818	0.399832	Leucine-rich repeat flightless-interacting protein 2 (LRR FLII-interacting protein 2)
Q9D0R8	Lsm12	LSM12_MOUSE	TB_24H-MOCK_24H	0.031152	0.881299	0.949082	no	0.031152	0.949082	Protein LSM12 homolog
Q8K2F8	Lsm14a	LS14A_MOUSE	TB_24H-MOCK_24H	-0.0397267	0.863522	0.945064	no	-0.0397267	0.945064	Protein LSM14 homolog A (Protein FAM61A) (RNA-associated protein 55A) (mRAP55A)
O35900	Lsm2	LSM2_MOUSE	TB_24H-MOCK_24H	0.242478	0.576874	0.802977	no	0.242478	0.802977	U6 snRNA-associated Sm-like protein LSm2 (Protein G7b) (snRNP core Sm-like protein Sm-x5)
P62311	Lsm3	LSM3_MOUSE	TB_24H-MOCK_24H	-0.35124	0.461905	0.736419	no	-0.35124	0.736419	U6 snRNA-associated Sm-like protein LSm3
Q9QXA5	Lsm4	LSM4_MOUSE	TB_24H-MOCK_24H	-0.257635	0.501442	0.765713	no	-0.257635	0.765713	U6 snRNA-associated Sm-like protein LSm4
P62322	Lsm5	LSM5_MOUSE	TB_24H-MOCK_24H	-0.455989	0.392701	0.673823	no	-0.455989	0.673823	U6 snRNA-associated Sm-like protein LSm5
P62313	Lsm6	LSM6_MOUSE	TB_24H-MOCK_24H	-0.666229	0.171329	0.429821	no	-0.666229	0.429821	U6 snRNA-associated Sm-like protein LSm6
Q6ZWM4	Lsm8	LSM8_MOUSE	TB_24H-MOCK_24H	-0.573265	0.24033	0.520602	no	-0.573265	0.520602	U6 snRNA-associated Sm-like protein LSm8
P19973	Lsp1	LSP1_MOUSE	TB_24H-MOCK_24H	-0.236517	0.580619	0.805006	no	-0.236517	0.805006	Lymphocyte-specific protein 1 (52 kDa phosphoprotein) (pp52) (Lymphocyte-specific antigen WP34) (S37 protein)
Q8BLN5	Lss	ERG7_MOUSE	TB_24H-MOCK_24H	-0.680123	0.059845	0.217725	no	-0.680123	0.217725	Lanosterol synthase (EC 5.4.99.7) (2,3-epoxysqualene--lanosterol cyclase) (Oxidosqualene--lanosterol cyclase) (OSC)
P24527	Lta4h	LKHA4_MOUSE	TB_24H-MOCK_24H	-0.169263	0.284481	0.568063	no	-0.169263	0.568063	Leukotriene A-4 hydrolase (LTA-4 hydrolase) (EC 3.3.2.6) (Leukotriene A(4) hydrolase)
Q9CYI4	Luc7l	LUC7L_MOUSE	TB_24H-MOCK_24H	-0.430977	0.365897	0.654191	no	-0.430977	0.654191	Putative RNA-binding protein Luc7-like 1
Q7TNC4	Luc7l2	LC7L2_MOUSE	TB_24H-MOCK_24H	-0.204594	0.561902	0.795583	no	-0.204594	0.795583	Putative RNA-binding protein Luc7-like 2 (CGI-74 homolog)
Q5SUF2	Luc7l3	LC7L3_MOUSE	TB_24H-MOCK_24H	0.084706	0.872566	0.945978	no	0.084706	0.945978	Luc7-like protein 3 (Cisplatin resistance-associated-overexpressed protein)
Q8R4U7	Luzp1	LUZP1_MOUSE	TB_24H-MOCK_24H	-0.214775	0.499736	0.764313	no	-0.214775	0.764313	Leucine zipper protein 1 (Leucine zipper motif-containing protein)
P70202	Lxn	LXN_MOUSE	TB_24H-MOCK_24H	-0.0565068	0.868206	0.945926	no	-0.0565068	0.945926	Latexin (Endogenous carboxypeptidase inhibitor) (ECI) (Tissue carboxypeptidase inhibitor) (TCI)
O88188	Ly86	LY86_MOUSE	TB_24H-MOCK_24H	0.54306	0.0480845	0.186633	no	0.54306	0.186633	Lymphocyte antigen 86 (Ly-86) (Protein MD-1)
Q01965	Ly9	LY9_MOUSE	TB_24H-MOCK_24H	-0.0448296	0.708324	0.87239	no	-0.0448296	0.87239	T-lymphocyte surface antigen Ly-9 (Cell surface molecule Ly-9) (Lymphocyte antigen 9) (SLAM family member 3) (SLAMF3) (Signaling lymphocytic activation molecule 3) (CD antigen CD229)
Q08288	Lyar	LYAR_MOUSE	TB_24H-MOCK_24H	-0.463378	0.195267	0.464299	no	-0.463378	0.464299	Cell growth-regulating nucleolar protein (Protein expressed in male leptotene and zygotene spermatocytes 264) (MLZ-264)
P25911	Lyn	LYN_MOUSE	TB_24H-MOCK_24H	0.61237	4.8974e-06	0.000114204	no	0.61237	0.000114204	Tyrosine-protein kinase Lyn (EC 2.7.10.2) (V-yes-1 Yamaguchi sarcoma viral related oncogene homolog) (p53Lyn) (p56Lyn)
P97823	Lypla1	LYPA1_MOUSE	TB_24H-MOCK_24H	-0.169838	0.507434	0.767596	no	-0.169838	0.767596	Acyl-protein thioesterase 1 (APT-1) (EC 3.1.2.-) (Lysophospholipase 1) (Lysophospholipase I) (LPL-I) (LysoPLA I)
Q9WTL7	Lypla2	LYPA2_MOUSE	TB_24H-MOCK_24H	-0.240778	0.287673	0.570776	no	-0.240778	0.570776	Acyl-protein thioesterase 2 (APT-2) (EC 3.1.2.-) (Lysophospholipase 2) (Lysophospholipase II) (LPL-II) (LysoPLA II) (mLyso II)
Q8K215	Lyrm4	LYRM4_MOUSE	TB_24H-MOCK_24H	-0.106924	0.379893	0.664748	no	-0.106924	0.664748	LYR motif-containing protein 4
P08905	Lyz2	LYZ2_MOUSE	TB_24H-MOCK_24H	-0.272763	0.494519	0.76024	no	-0.272763	0.76024	Lysozyme C-2 (EC 3.2.1.17) (1,4-beta-N-acetylmuramidase C) (Lysozyme C type M)
Q9JHQ5	Lztfl1	LZTL1_MOUSE	TB_24H-MOCK_24H	0.534876	0.0631457	0.22508	no	0.534876	0.22508	Leucine zipper transcription factor-like protein 1
P24668	M6pr	MPRD_MOUSE	TB_24H-MOCK_24H	0.416461	0.0284076	0.130756	no	0.416461	0.130756	Cation-dependent mannose-6-phosphate receptor (CD Man-6-P receptor) (CD-MPR) (46 kDa mannose 6-phosphate receptor) (MPR 46)
Q9QXZ0	Macf1	MACF1_MOUSE	TB_24H-MOCK_24H	-0.510941	0.000333904	0.00410331	no	-0.510941	0.00410331	Microtubule-actin cross-linking factor 1 (Actin cross-linking family 7)
Q922B1	Macrod1	MACD1_MOUSE	TB_24H-MOCK_24H	0.359982	0.171145	0.429638	no	0.359982	0.429638	O-acetyl-ADP-ribose deacetylase MACROD1 (EC 3.2.2.-) (EC 3.5.1.-) (MACRO domain-containing protein 1) (Protein LRP16) ([Protein ADP-ribosylglutamate] hydrolase)
Q9WTX8	Mad1l1	MD1L1_MOUSE	TB_24H-MOCK_24H	-0.120649	0.70268	0.870703	no	-0.120649	0.870703	Mitotic spindle assembly checkpoint protein MAD1 (Mitotic arrest deficient 1-like protein 1) (MAD1-like protein 1)
Q9Z1B5	Mad2l1	MD2L1_MOUSE	TB_24H-MOCK_24H	-0.974456	0.000418615	0.00491048	no	-0.974456	0.00491048	Mitotic spindle assembly checkpoint protein MAD2A (Mitotic arrest deficient 2-like protein 1) (MAD2-like protein 1)
Q80U28	Madd	MADD_MOUSE	TB_24H-MOCK_24H	0.445501	0.19016	0.456872	no	0.445501	0.456872	MAP kinase-activating death domain protein (Rab3 GDP/GTP exchange factor)
Q4VC33	Maea	MAEA_MOUSE	TB_24H-MOCK_24H	-0.067319	0.759592	0.897826	no	-0.067319	0.897826	Macrophage erythroblast attacher (Erythroblast macrophage protein)
P54843	Maf	MAF_MOUSE	TB_24H-MOCK_24H	-0.058249	0.833186	0.930018	no	-0.058249	0.930018	Transcription factor Maf (Proto-oncogene c-Maf) (V-maf musculoaponeurotic fibrosarcoma oncogene homolog)
O54790	Mafg	MAFG_MOUSE	TB_24H-MOCK_24H	-0.230985	0.161543	0.417168	no	-0.230985	0.417168	Transcription factor MafG (V-maf musculoaponeurotic fibrosarcoma oncogene homolog G)
P61327	Magoh	MGN_MOUSE	TB_24H-MOCK_24H	-0.762503	0.0283392	0.130602	no	-0.762503	0.130602	Protein mago nashi homolog
Q9CQY5	Magt1	MAGT1_MOUSE	TB_24H-MOCK_24H	-0.100712	0.578096	0.803523	no	-0.100712	0.803523	Magnesium transporter protein 1 (MagT1) (Implantation-associated protein) (IAP)
Q2TBA3	Malt1	MALT1_MOUSE	TB_24H-MOCK_24H	#NUM!		0	yes	5.68328	0.0430462	Mucosa-associated lymphoid tissue lymphoma translocation protein 1 homolog (EC 3.4.22.-) (Paracaspase)
P45700	Man1a1	MA1A1_MOUSE	TB_24H-MOCK_24H	-0.284075	0.31396	0.599632	no	-0.284075	0.599632	Mannosyl-oligosaccharide 1,2-alpha-mannosidase IA (EC 3.2.1.113) (Man(9)-alpha-mannosidase) (Man9-mannosidase) (Mannosidase alpha class 1A member 1) (Processing alpha-1,2-mannosidase IA) (Alpha-1,2-mannosidase IA)
P27046	Man2a1	MA2A1_MOUSE	TB_24H-MOCK_24H	0.408548	0.0832456	0.271767	no	0.408548	0.271767	Alpha-mannosidase 2 (EC 3.2.1.114) (Golgi alpha-mannosidase II) (AMan II) (Man II) (Mannosidase alpha class 2A member 1) (Mannosyl-oligosaccharide 1,3-1,6-alpha-mannosidase)
O09159	Man2b1	MA2B1_MOUSE	TB_24H-MOCK_24H	0.0172684	0.93621	0.975575	no	0.0172684	0.975575	Lysosomal alpha-mannosidase (Laman) (EC 3.2.1.24) (Lysosomal acid alpha-mannosidase) (Mannosidase alpha class 2B member 1) (Mannosidase alpha-B)
O54782	Man2b2	MA2B2_MOUSE	TB_24H-MOCK_24H	0.340976	0.231138	0.507589	no	0.340976	0.507589	Epididymis-specific alpha-mannosidase (EC 3.2.1.24) (Mannosidase alpha class 2B member 2)
Q91W89	Man2c1	MA2C1_MOUSE	TB_24H-MOCK_24H	-0.463283	0.119138	0.348326	no	-0.463283	0.348326	Alpha-mannosidase 2C1 (EC 3.2.1.24) (Alpha-D-mannoside mannohydrolase) (Mannosidase alpha class 2C member 1)
Q8K2I4	Manba	MANBA_MOUSE	TB_24H-MOCK_24H	0.209444	0.594573	0.813859	no	0.209444	0.813859	Beta-mannosidase (EC 3.2.1.25) (Lysosomal beta A mannosidase) (Mannanase) (Mannase)
Q9CXI5	Manf	MANF_MOUSE	TB_24H-MOCK_24H	-0.0305629	0.962002	0.985944	no	-0.0305629	0.985944	Mesencephalic astrocyte-derived neurotrophic factor (Arginine-rich protein) (Protein ARMET)
Q64133	Maoa	AOFA_MOUSE	TB_24H-MOCK_24H	-0.375273	0.279031	0.562207	no	-0.375273	0.562207	Amine oxidase [flavin-containing] A (EC 1.4.3.4) (Monoamine oxidase type A) (MAO-A)
Q9CQV6	Map1lc3b	MLP3B_MOUSE	TB_24H-MOCK_24H	0.470952	0.0778988	0.260403	no	0.470952	0.260403	Microtubule-associated proteins 1A/1B light chain 3B (Autophagy-related protein LC3 B) (Autophagy-related ubiquitin-like modifier LC3 B) (MAP1 light chain 3-like protein 2) (MAP1A/MAP1B light chain 3 B) (MAP1A/MAP1B LC3 B) (Microtubule-associated protein 1 light chain 3 beta)
Q8C052	Map1s	MAP1S_MOUSE	TB_24H-MOCK_24H	-0.260462	0.0374708	0.15715	no	-0.260462	0.15715	Microtubule-associated protein 1S (MAP-1S) (BPY2-interacting protein 1) (Microtubule-associated protein 8) [Cleaved into: MAP1S heavy chain; MAP1S light chain]
P31938	Map2k1	MP2K1_MOUSE	TB_24H-MOCK_24H	0.529783	0.000544734	0.00609441	no	0.529783	0.00609441	Dual specificity mitogen-activated protein kinase kinase 1 (MAP kinase kinase 1) (MAPKK 1) (EC 2.7.12.2) (ERK activator kinase 1) (MAPK/ERK kinase 1) (MEK 1)
Q63932	Map2k2	MP2K2_MOUSE	TB_24H-MOCK_24H	-0.107874	0.460737	0.735772	no	-0.107874	0.735772	Dual specificity mitogen-activated protein kinase kinase 2 (MAP kinase kinase 2) (MAPKK 2) (EC 2.7.12.2) (ERK activator kinase 2) (MAPK/ERK kinase 2) (MEK 2)
O09110	Map2k3	MP2K3_MOUSE	TB_24H-MOCK_24H	-0.209098	0.124858	0.356961	no	-0.209098	0.356961	Dual specificity mitogen-activated protein kinase kinase 3 (MAP kinase kinase 3) (MAPKK 3) (EC 2.7.12.2) (MAPK/ERK kinase 3) (MEK 3)
P47809	Map2k4	MP2K4_MOUSE	TB_24H-MOCK_24H	0.270328	0.186317	0.452577	no	0.270328	0.452577	Dual specificity mitogen-activated protein kinase kinase 4 (MAP kinase kinase 4) (MAPKK 4) (EC 2.7.12.2) (C-JUN N-terminal kinase kinase 1) (JNK kinase 1) (JNKK 1) (JNK-activating kinase 1) (MAPK/ERK kinase 4) (MEK 4) (SAPK/ERK kinase 1) (SEK1)
Q61083	Map3k2	M3K2_MOUSE	TB_24H-MOCK_24H	0.208264	0.630419	0.834308	no	0.208264	0.834308	Mitogen-activated protein kinase kinase kinase 2 (EC 2.7.11.25) (MAPK/ERK kinase kinase 2) (MEK kinase 2) (MEKK 2)
Q62073	Map3k7	M3K7_MOUSE	TB_24H-MOCK_24H	0.14715	0.516835	0.772261	no	0.14715	0.772261	Mitogen-activated protein kinase kinase kinase 7 (EC 2.7.11.25) (Transforming growth factor-beta-activated kinase 1) (TGF-beta-activated kinase 1)
P27546	Map4	MAP4_MOUSE	TB_24H-MOCK_24H	-0.0437847	0.817715	0.924048	no	-0.0437847	0.924048	Microtubule-associated protein 4 (MAP-4)
Q99JP0	Map4k3	M4K3_MOUSE	TB_24H-MOCK_24H	0.0266634	0.922038	0.968841	no	0.0266634	0.968841	Mitogen-activated protein kinase kinase kinase kinase 3 (EC 2.7.11.1) (Germinal center kinase-related protein kinase) (GLK) (MAPK/ERK kinase kinase kinase 3) (MEK kinase kinase 3) (MEKKK 3)
P97820	Map4k4	M4K4_MOUSE	TB_24H-MOCK_24H	0.527456	0.0700769	0.241546	no	0.527456	0.241546	Mitogen-activated protein kinase kinase kinase kinase 4 (EC 2.7.11.1) (HPK/GCK-like kinase HGK) (MAPK/ERK kinase kinase kinase 4) (MEK kinase kinase 4) (MEKKK 4) (Nck-interacting kinase)
A2AJI0	Map7d1	MA7D1_MOUSE	TB_24H-MOCK_24H	-0.00568887	0.975379	0.99282	no	-0.00568887	0.99282	MAP7 domain-containing protein 1
Q3TRR0	Map9	MAP9_MOUSE	TB_24H-MOCK_24H	0.0642418	0.796806	0.914991	no	0.0642418	0.914991	Microtubule-associated protein 9 (Aster-associated protein)
P63085	Mapk1	MK01_MOUSE	TB_24H-MOCK_24H	-0.291997	0.0152279	0.0829074	no	-0.291997	0.0829074	Mitogen-activated protein kinase 1 (MAP kinase 1) (MAPK 1) (EC 2.7.11.24) (ERT1) (Extracellular signal-regulated kinase 2) (ERK-2) (MAP kinase isoform p42) (p42-MAPK) (Mitogen-activated protein kinase 2) (MAP kinase 2) (MAPK 2)
P47811	Mapk14	MK14_MOUSE	TB_24H-MOCK_24H	-0.0699337	0.655194	0.84364	no	-0.0699337	0.84364	Mitogen-activated protein kinase 14 (MAP kinase 14) (MAPK 14) (EC 2.7.11.24) (CRK1) (Mitogen-activated protein kinase p38 alpha) (MAP kinase p38 alpha)
Q63844	Mapk3	MK03_MOUSE	TB_24H-MOCK_24H	-0.0105781	0.904963	0.95935	no	-0.0105781	0.95935	Mitogen-activated protein kinase 3 (MAP kinase 3) (MAPK 3) (EC 2.7.11.24) (ERT2) (Extracellular signal-regulated kinase 1) (ERK-1) (Insulin-stimulated MAP2 kinase) (MAP kinase isoform p44) (p44-MAPK) (MNK1) (Microtubule-associated protein 2 kinase) (p44-ERK1)
Q9WVS8	Mapk7	MK07_MOUSE	TB_24H-MOCK_24H	0.816872	0.0127244	0.073017	no	0.816872	0.073017	Mitogen-activated protein kinase 7 (MAP kinase 7) (MAPK 7) (EC 2.7.11.24) (Big MAP kinase 1) (BMK-1) (Extracellular signal-regulated kinase 5) (ERK-5)
Q9WTU6	Mapk9	MK09_MOUSE	TB_24H-MOCK_24H	-0.137744	0.726705	0.881215	no	-0.137744	0.881215	Mitogen-activated protein kinase 9 (MAP kinase 9) (MAPK 9) (EC 2.7.11.24) (Stress-activated protein kinase JNK2) (c-Jun N-terminal kinase 2)
P49138	Mapkapk2	MAPK2_MOUSE	TB_24H-MOCK_24H	0.0499632	0.83434	0.930511	no	0.0499632	0.930511	MAP kinase-activated protein kinase 2 (MAPK-activated protein kinase 2) (MAPKAP kinase 2) (MAPKAP-K2) (MAPKAPK-2) (MK-2) (MK2) (EC 2.7.11.1)
Q61166	Mapre1	MARE1_MOUSE	TB_24H-MOCK_24H	-0.273285	0.0524513	0.198017	no	-0.273285	0.198017	Microtubule-associated protein RP/EB family member 1 (APC-binding protein EB1) (End-binding protein 1) (EB1)
Q8R001	Mapre2	MARE2_MOUSE	TB_24H-MOCK_24H	-0.116838	0.44432	0.722976	no	-0.116838	0.722976	Microtubule-associated protein RP/EB family member 2 (APC-binding protein EB2) (End-binding protein 2) (EB2)
Q922Q1	Marc2	MARC2_MOUSE	TB_24H-MOCK_24H	-0.609919	0.0661084	0.232219	no	-0.609919	0.232219	Mitochondrial amidoxime reducing component 2 (mARC2) (EC 1.-.-.-) (Molybdenum cofactor sulfurase C-terminal domain-containing protein 2) (MOSC domain-containing protein 2) (Moco sulfurase C-terminal domain-containing protein 2)
Q3KNM2	March5	MARH5_MOUSE	TB_24H-MOCK_24H	0.234389	0.559562	0.793721	no	0.234389	0.793721	E3 ubiquitin-protein ligase MARCH5 (EC 6.3.2.-) (Membrane-associated RING finger protein 5) (Membrane-associated RING-CH protein V) (MARCH-V)
P26645	Marcks	MARCS_MOUSE	TB_24H-MOCK_24H	0.589383	0.259147	0.542746	no	0.589383	0.542746	Myristoylated alanine-rich C-kinase substrate (MARCKS)
P28667	Marcksl1	MRP_MOUSE	TB_24H-MOCK_24H	2.45939	9.4658e-06	0.000202443	no	2.45939	0.000202443	MARCKS-related protein (Brain protein F52) (MARCKS-like protein 1) (Macrophage myristoylated alanine-rich C kinase substrate) (Mac-MARCKS) (MacMARCKS)
Q05512	Mark2	MARK2_MOUSE	TB_24H-MOCK_24H	0.188482	0.261059	0.544481	no	0.188482	0.544481	Serine/threonine-protein kinase MARK2 (EC 2.7.11.1) (EC 2.7.11.26) (ELKL motif kinase 1) (EMK-1) (MAP/microtubule affinity-regulating kinase 2) (PAR1 homolog) (PAR1 homolog b) (Par-1b) (mPar-1b)
Q68FL6	Mars	SYMC_MOUSE	TB_24H-MOCK_24H	-0.24587	0.0917033	0.287203	no	-0.24587	0.287203	Methionine--tRNA ligase, cytoplasmic (EC 6.1.1.10) (Methionyl-tRNA synthetase) (MetRS)
Q3THS6	Mat2a	METK2_MOUSE	TB_24H-MOCK_24H	-0.207772	0.38236	0.666848	no	-0.207772	0.666848	S-adenosylmethionine synthase isoform type-2 (AdoMet synthase 2) (EC 2.5.1.6) (Methionine adenosyltransferase 2) (MAT 2)
Q99LB6	Mat2b	MAT2B_MOUSE	TB_24H-MOCK_24H	-0.264634	0.122992	0.355044	no	-0.264634	0.355044	Methionine adenosyltransferase 2 subunit beta (Methionine adenosyltransferase II beta) (MAT II beta)
Q8K310	Matr3	MATR3_MOUSE	TB_24H-MOCK_24H	-0.204536	0.153838	0.404831	no	-0.204536	0.404831	Matrin-3
Q8VCF0	Mavs	MAVS_MOUSE	TB_24H-MOCK_24H	-0.400875	0.00418326	0.0309626	no	-0.400875	0.0309626	Mitochondrial antiviral-signaling protein (MAVS) (CARD adapter inducing interferon beta) (Cardif) (Interferon beta promoter stimulator protein 1) (IPS-1) (Virus-induced-signaling adapter) (VISA)
Q9Z2E1	Mbd2	MBD2_MOUSE	TB_24H-MOCK_24H	0.256808	0.0391016	0.161539	no	0.256808	0.161539	Methyl-CpG-binding domain protein 2 (Methyl-CpG-binding protein MBD2)
Q99LQ1	Mbip	MBIP1_MOUSE	TB_24H-MOCK_24H	-1.29973	0.25675	0.540152	no	-1.29973	0.540152	MAP3K12-binding inhibitory protein 1 (MAPK upstream kinase-binding inhibitory protein) (MUK-binding inhibitory protein)
Q9JKP5	Mbnl1	MBNL1_MOUSE	TB_24H-MOCK_24H	-0.255	0.573976	0.802201	no	-0.255	0.802201	Muscleblind-like protein 1 (Triplet-expansion RNA-binding protein)
Q8C181	Mbnl2	MBNL2_MOUSE	TB_24H-MOCK_24H	-0.0817994	0.748257	0.891166	no	-0.0817994	0.891166	Muscleblind-like protein 2
Q8R3F5	Mcat	FABD_MOUSE	TB_24H-MOCK_24H	-0.0753962	0.799655	0.916342	no	-0.0753962	0.916342	Malonyl-CoA-acyl carrier protein transacylase, mitochondrial (MCT) (EC 2.3.1.39) (Mitochondrial malonyltransferase) ([Acyl-carrier-protein] malonyltransferase)
Q99MR8	Mccc1	MCCA_MOUSE	TB_24H-MOCK_24H	-0.27073	0.288073	0.571277	no	-0.27073	0.571277	Methylcrotonoyl-CoA carboxylase subunit alpha, mitochondrial (MCCase subunit alpha) (EC 6.4.1.4) (3-methylcrotonyl-CoA carboxylase 1) (3-methylcrotonyl-CoA carboxylase biotin-containing subunit) (3-methylcrotonyl-CoA:carbon dioxide ligase subunit alpha)
Q3ULD5	Mccc2	MCCB_MOUSE	TB_24H-MOCK_24H	-0.442373	0.179046	0.441894	no	-0.442373	0.441894	Methylcrotonoyl-CoA carboxylase beta chain, mitochondrial (MCCase subunit beta) (EC 6.4.1.4) (3-methylcrotonyl-CoA carboxylase 2) (3-methylcrotonyl-CoA carboxylase non-biotin-containing subunit) (3-methylcrotonyl-CoA:carbon dioxide ligase subunit beta)
Q9D1I5	Mcee	MCEE_MOUSE	TB_24H-MOCK_24H	-0.216699	0.293244	0.576216	no	-0.216699	0.576216	Methylmalonyl-CoA epimerase, mitochondrial (EC 5.1.99.1) (DL-methylmalonyl-CoA racemase)
P97287	Mcl1	MCL1_MOUSE	TB_24H-MOCK_24H	0.950285	8.6566e-07	2.4822e-05	no	0.950285	2.4822e-05	Induced myeloid leukemia cell differentiation protein Mcl-1 homolog (Bcl-2-related protein EAT/mcl1)
P97310	Mcm2	MCM2_MOUSE	TB_24H-MOCK_24H	-1.19614	6.77848e-07	1.98784e-05	no	-1.19614	1.98784e-05	DNA replication licensing factor MCM2 (EC 3.6.4.12) (Minichromosome maintenance protein 2 homolog) (Nuclear protein BM28)
P25206	Mcm3	MCM3_MOUSE	TB_24H-MOCK_24H	-1.46378	1.01045e-06	2.79388e-05	no	-1.46378	2.79388e-05	DNA replication licensing factor MCM3 (EC 3.6.4.12) (DNA polymerase alpha holoenzyme-associated protein P1) (P1-MCM3)
P49717	Mcm4	MCM4_MOUSE	TB_24H-MOCK_24H	-1.12808	4.69679e-05	0.000811665	no	-1.12808	0.000811665	DNA replication licensing factor MCM4 (EC 3.6.4.12) (CDC21 homolog) (P1-CDC21)
P49718	Mcm5	MCM5_MOUSE	TB_24H-MOCK_24H	-1.31677	7.00747e-05	0.00115923	no	-1.31677	0.00115923	DNA replication licensing factor MCM5 (EC 3.6.4.12) (CDC46 homolog) (P1-CDC46)
P97311	Mcm6	MCM6_MOUSE	TB_24H-MOCK_24H	-1.17154	0.0029582	0.0240571	no	-1.17154	0.0240571	DNA replication licensing factor MCM6 (EC 3.6.4.12) (Mis5 homolog)
Q61881	Mcm7	MCM7_MOUSE	TB_24H-MOCK_24H	-1.17235	2.22705e-07	7.43183e-06	no	-1.17235	7.43183e-06	DNA replication licensing factor MCM7 (EC 3.6.4.12) (CDC47 homolog)
Q8R3C0	Mcmbp	MCMBP_MOUSE	TB_24H-MOCK_24H	-0.459896	0.150125	0.399938	no	-0.459896	0.399938	Mini-chromosome maintenance complex-binding protein (MCM-BP) (MCM-binding protein)
Q9DB27	Mcts1	MCTS1_MOUSE	TB_24H-MOCK_24H	0.179092	0.608959	0.821639	no	0.179092	0.821639	Malignant T-cell-amplified sequence 1 (MCT-1) (Multiple copies T-cell malignancies 1)
Q3UMR5	Mcu	MCU_MOUSE	TB_24H-MOCK_24H	0.0606395	0.881658	0.949082	no	0.0606395	0.949082	Calcium uniporter protein, mitochondrial
Q810S1	Mcub	MCUB_MOUSE	TB_24H-MOCK_24H	-0.207752	0.800256	0.916342	no	-0.207752	0.916342	Calcium uniporter regulatory subunit MCUb, mitochondrial (MCUb) (Coiled-coil domain-containing protein 109B)
Q5PSV9	Mdc1	MDC1_MOUSE	TB_24H-MOCK_24H	#NUM!		0	yes	-4.42203	0.0111778	Mediator of DNA damage checkpoint protein 1
P14152	Mdh1	MDHC_MOUSE	TB_24H-MOCK_24H	-0.231904	0.0440966	0.175796	no	-0.231904	0.175796	Malate dehydrogenase, cytoplasmic (EC 1.1.1.37) (Cytosolic malate dehydrogenase)
P08249	Mdh2	MDHM_MOUSE	TB_24H-MOCK_24H	0.0610552	0.636413	0.83681	no	0.0610552	0.83681	Malate dehydrogenase, mitochondrial (EC 1.1.1.37)
Q9D967	Mdp1	MGDP1_MOUSE	TB_24H-MOCK_24H	-0.349156	0.286317	0.568959	no	-0.349156	0.568959	Magnesium-dependent phosphatase 1 (MDP-1) (EC 3.1.3.-) (EC 3.1.3.48)
Q99KE1	Me2	MAOM_MOUSE	TB_24H-MOCK_24H	0.021915	0.861362	0.944051	no	0.021915	0.944051	NAD-dependent malic enzyme, mitochondrial (NAD-ME) (EC 1.1.1.38) (Malic enzyme 2)
Q9Z2D6	Mecp2	MECP2_MOUSE	TB_24H-MOCK_24H	1.04459	0.000543615	0.00609441	no	1.04459	0.00609441	Methyl-CpG-binding protein 2 (MeCp-2 protein) (MeCp2)
Q9DCS3	Mecr	MECR_MOUSE	TB_24H-MOCK_24H	0.116716	0.43495	0.712824	no	0.116716	0.712824	Trans-2-enoyl-CoA reductase, mitochondrial (EC 1.3.1.38)
Q925J9	Med1	MED1_MOUSE	TB_24H-MOCK_24H	0.067733	0.832765	0.930018	no	0.067733	0.930018	Mediator of RNA polymerase II transcription subunit 1 (Mediator complex subunit 1) (Peroxisome proliferator-activated receptor-binding protein) (PBP) (PPAR-binding protein) (Thyroid hormone receptor-associated protein complex 220 kDa component) (Trap220) (Thyroid receptor-interacting protein 2) (TR-interacting protein 2) (TRIP-2)
Q9D8C6	Med11	MED11_MOUSE	TB_24H-MOCK_24H	-0.44218	0.293192	0.576216	no	-0.44218	0.576216	Mediator of RNA polymerase II transcription subunit 11 (Mediator complex subunit 11)
A2AGH6	Med12	MED12_MOUSE	TB_24H-MOCK_24H	-0.0324629	0.886458	0.951076	no	-0.0324629	0.951076	Mediator of RNA polymerase II transcription subunit 12 (Mediator complex subunit 12) (OPA-containing protein) (Thyroid hormone receptor-associated protein complex 230 kDa component) (Trap230) (Trinucleotide repeat-containing gene 11 protein)
Q924H2	Med15	MED15_MOUSE	TB_24H-MOCK_24H	-0.391593	0.116471	0.34338	no	-0.391593	0.34338	Mediator of RNA polymerase II transcription subunit 15 (Mediator complex subunit 15) (Positive cofactor 2 glutamine/Q-rich-associated protein) (PC2 glutamine/Q-rich-associated protein) (mPcqap)
Q8VCD5	Med17	MED17_MOUSE	TB_24H-MOCK_24H	-0.0499372	0.911354	0.961267	no	-0.0499372	0.961267	Mediator of RNA polymerase II transcription subunit 17 (Cofactor required for Sp1 transcriptional activation subunit 6) (CRSP complex subunit 6) (Mediator complex subunit 17) (Thyroid hormone receptor-associated protein complex 80 kDa component)
Q62276	Med22	MED22_MOUSE	TB_24H-MOCK_24H	-0.809916	0.0151367	0.0825272	no	-0.809916	0.0825272	Mediator of RNA polymerase II transcription subunit 22 (Mediator complex subunit 22) (Surfeit locus protein 5) (Surf-5)
Q9CXU1	Med31	MED31_MOUSE	TB_24H-MOCK_24H	-1.22924	0.00257155	0.0214851	no	-1.22924	0.0214851	Mediator of RNA polymerase II transcription subunit 31 (Mediator complex subunit 31) (Mediator complex subunit SOH1)
Q91VH6	Memo1	MEMO1_MOUSE	TB_24H-MOCK_24H	-1.11089	0.000812698	0.0084342	no	-1.11089	0.0084342	Protein MEMO1 (Mediator of ErbB2-driven cell motility 1) (Memo-1)
Q8K3A9	Mepce	MEPCE_MOUSE	TB_24H-MOCK_24H	-0.381047	0.321574	0.607225	no	-0.381047	0.607225	7SK snRNA methylphosphate capping enzyme (MePCE) (EC 2.1.1.-)
Q8BP48	Metap1	MAP11_MOUSE	TB_24H-MOCK_24H	-0.311909	0.455306	0.732262	no	-0.311909	0.732262	Methionine aminopeptidase 1 (MAP 1) (MetAP 1) (EC 3.4.11.18) (Peptidase M 1)
O08663	Metap2	MAP2_MOUSE	TB_24H-MOCK_24H	-0.966549	0.00578657	0.0402874	no	-0.966549	0.0402874	Methionine aminopeptidase 2 (MAP 2) (MetAP 2) (EC 3.4.11.18) (Initiation factor 2-associated 67 kDa glycoprotein) (p67) (p67eIF2) (Peptidase M)
Q6PCP5	Mff	MFF_MOUSE	TB_24H-MOCK_24H	0.071144	0.585797	0.808535	no	0.071144	0.808535	Mitochondrial fission factor
P21956	Mfge8	MFGM_MOUSE	TB_24H-MOCK_24H	0.179116	0.809657	0.921296	no	0.179116	0.921296	Lactadherin (MFGM) (Milk fat globule-EGF factor 8) (MFG-E8) (SED1) (Sperm surface protein SP47) (MP47)
Q9DC37	Mfsd1	MFSD1_MOUSE	TB_24H-MOCK_24H	-0.27709	0.256993	0.540369	no	-0.27709	0.540369	Major facilitator superfamily domain-containing protein 1
P27808	Mgat1	MGAT1_MOUSE	TB_24H-MOCK_24H	0.377055	0.1914	0.4582	no	0.377055	0.4582	Alpha-1,3-mannosyl-glycoprotein 2-beta-N-acetylglucosaminyltransferase (EC 2.4.1.101) (N-glycosyl-oligosaccharide-glycoprotein N-acetylglucosaminyltransferase I) (GNT-I) (GlcNAc-T I)
Q921V5	Mgat2	MGAT2_MOUSE	TB_24H-MOCK_24H	-0.106695	0.761617	0.899122	no	-0.106695	0.899122	Alpha-1,6-mannosyl-glycoprotein 2-beta-N-acetylglucosaminyltransferase (EC 2.4.1.143) (Beta-1,2-N-acetylglucosaminyltransferase II) (GlcNAc-T II) (GNT-II) (Mannoside acetylglucosaminyltransferase 2) (N-glycosyl-oligosaccharide-glycoprotein N-acetylglucosaminyltransferase II)
Q9EQQ9	Mgea5	OGA_MOUSE	TB_24H-MOCK_24H	0.263807	0.40222	0.680206	no	0.263807	0.680206	Protein O-GlcNAcase (OGA) (EC 3.2.1.169) (Beta-N-acetylhexosaminidase) (Beta-hexosaminidase) (Bifunctional protein NCOAT) (Meningioma-expressed antigen 5) (N-acetyl-beta-D-glucosaminidase) (EC 3.2.1.52) (N-acetyl-beta-glucosaminidase)
Q91VS7	Mgst1	MGST1_MOUSE	TB_24H-MOCK_24H	0.648662	9.7814e-05	0.00149659	no	0.648662	0.00149659	Microsomal glutathione S-transferase 1 (Microsomal GST-1) (EC 2.5.1.18) (Microsomal GST-I)
Q9CPU4	Mgst3	MGST3_MOUSE	TB_24H-MOCK_24H	-0.215012	0.247227	0.528809	no	-0.215012	0.528809	Microsomal glutathione S-transferase 3 (Microsomal GST-3) (EC 2.5.1.18) (Microsomal GST-III)
Q8BI84	Mia3	MIA3_MOUSE	TB_24H-MOCK_24H	-0.272466	0.310813	0.598192	no	-0.272466	0.598192	Melanoma inhibitory activity protein 3 (Transport and Golgi organization protein 1)
Q8R404	Mic13	MIC13_MOUSE	TB_24H-MOCK_24H	-0.0985395	0.616905	0.825739	no	-0.0985395	0.825739	MICOS complex subunit MIC13
Q8VDP3	Mical1	MICA1_MOUSE	TB_24H-MOCK_24H	-0.589864	0.000817178	0.00845801	no	-0.589864	0.00845801	Protein-methionine sulfoxide oxidase MICAL1 (EC 1.14.13.-) (Molecule interacting with CasL protein 1) (MICAL-1) (mMical1) (NEDD9-interacting protein with calponin homology and LIM domains)
Q3TN34	Micall2	MILK2_MOUSE	TB_24H-MOCK_24H	0.594078	0.0274939	0.128073	no	0.594078	0.128073	MICAL-like protein 2 (Junctional Rab13-binding protein) (Molecule interacting with CasL-like 2) (MICAL-L2)
Q8VCX5	Micu1	MICU1_MOUSE	TB_24H-MOCK_24H	-0.035343	0.906434	0.959739	no	-0.035343	0.959739	Calcium uptake protein 1, mitochondrial (Calcium-binding atopy-related autoantigen 1 homolog)
P34884	Mif	MIF_MOUSE	TB_24H-MOCK_24H	-0.0485338	0.814955	0.923939	no	-0.0485338	0.923939	Macrophage migration inhibitory factor (MIF) (EC 5.3.2.1) (Delayed early response protein 6) (DER6) (Glycosylation-inhibiting factor) (GIF) (L-dopachrome isomerase) (L-dopachrome tautomerase) (EC 5.3.3.12) (Phenylpyruvate tautomerase)
Q3TB92	Milr1	MILR1_MOUSE	TB_24H-MOCK_24H	-0.196964	0.546792	0.786899	no	-0.196964	0.786899	Allergin-1 (Allergy inhibitory receptor 1) (Mast cell antigen 32) (MCA-32) (Mast cell Ag-32) (Mast cell immunoglobulin-like receptor 1)
Q9JM52	Mink1	MINK1_MOUSE	TB_24H-MOCK_24H	-0.316916	0.313898	0.599632	no	-0.316916	0.599632	Misshapen-like kinase 1 (EC 2.7.11.1) (GCK family kinase MiNK) (MAPK/ERK kinase kinase kinase 6) (MEK kinase kinase 6) (MEKKK 6) (Misshapen/NIK-related kinase) (Mitogen-activated protein kinase kinase kinase kinase 6)
Q7TNS2	Minos1	MIC10_MOUSE	TB_24H-MOCK_24H	-0.391485	0.0329876	0.143639	no	-0.391485	0.143639	MICOS complex subunit Mic10 (Mitochondrial inner membrane organizing system protein 1)
Q08874	Mitf	MITF_MOUSE	TB_24H-MOCK_24H	-0.36625	0.361268	0.649624	no	-0.36625	0.649624	Microphthalmia-associated transcription factor
E9PVX6	Mki67	KI67_MOUSE	TB_24H-MOCK_24H	-2.87831	8.89888e-12	9.06515e-10	no	-2.87831	9.06515e-10	Proliferation marker protein Ki-67 (Antigen identified by monoclonal antibody Ki-67 homolog) (Antigen KI-67 homolog) (Antigen Ki67 homolog)
Q8K4J6	Mkl1	MKL1_MOUSE	TB_24H-MOCK_24H	-0.568951	0.0215269	0.107418	no	-0.568951	0.107418	MKL/myocardin-like protein 1 (Basic SAP coiled-coil transcription activator) (Megakaryoblastic leukemia 1 protein homolog) (Myocardin-related transcription factor A) (MRTF-A)
P59759	Mkl2	MKL2_MOUSE	TB_24H-MOCK_24H	-0.411536	0.19491	0.46402	no	-0.411536	0.46402	MKL/myocardin-like protein 2 (Myocardin-related transcription factor B) (MRTF-B)
O89050	Mkln1	MKLN1_MOUSE	TB_24H-MOCK_24H	0.402502	0.0767577	0.258452	no	0.402502	0.258452	Muskelin
O08605	Mknk1	MKNK1_MOUSE	TB_24H-MOCK_24H	-0.213362	0.53917	0.783163	no	-0.213362	0.783163	MAP kinase-interacting serine/threonine-protein kinase 1 (EC 2.7.11.1) (MAP kinase signal-integrating kinase 1) (MAPK signal-integrating kinase 1) (Mnk1)
Q6ZQI3	Mlec	MLEC_MOUSE	TB_24H-MOCK_24H	-0.0780603	0.709903	0.873223	no	-0.0780603	0.873223	Malectin
Q9D2Y4	Mlkl	MLKL_MOUSE	TB_24H-MOCK_24H	1.73936	1.12006e-08	5.41967e-07	no	1.73936	5.41967e-07	Mixed lineage kinase domain-like protein
Q8K273	Mmgt1	MMGT1_MOUSE	TB_24H-MOCK_24H	-0.840961	0.00119689	0.0116704	no	-0.840961	0.0116704	Membrane magnesium transporter 1 (ER membrane protein complex subunit 5) (Transmembrane protein 32)
Q9D071	Mms19	MMS19_MOUSE	TB_24H-MOCK_24H	-0.208797	0.246241	0.528088	no	-0.208797	0.528088	MMS19 nucleotide excision repair protein homolog (MET18 homolog) (MMS19-like protein)
P0DOV1	Mnda	IFI5B_MOUSE	TB_24H-MOCK_24H	0.796015	0.147416	0.396247	no	0.796015	0.396247	Interferon-activable protein 205-B (Ifi-205-B) (Interferon-inducible protein p205-B) (Myeloid cell nuclear differentiation antigen) (Protein D3)
D0QMC3	Mndal	MNDAL_MOUSE	TB_24H-MOCK_24H	0.134011	0.465763	0.739355	no	0.134011	0.739355	Myeloid cell nuclear differentiation antigen-like protein
Q921Y0	Mob1a	MOB1A_MOUSE	TB_24H-MOCK_24H	-0.0390814	0.795434	0.914542	no	-0.0390814	0.914542	MOB kinase activator 1A (Mob1 homolog 1B) (Mps one binder kinase activator-like 1B)
Q8VI63	Mob2	MOB2_MOUSE	TB_24H-MOCK_24H	0.0913345	0.796401	0.914816	no	0.0913345	0.914816	MOB kinase activator 2 (Mob2 homolog) (Mps one binder kinase activator-like 2) (Ovary-specific MOB-like protein)
Q6PEB6	Mob4	PHOCN_MOUSE	TB_24H-MOCK_24H	0.210363	0.405655	0.683386	no	0.210363	0.683386	MOB-like protein phocein (Class II mMOB1) (Mob1 homolog 3) (Mob3) (Mps one binder kinase activator-like 3) (Preimplantation protein 3)
Q14CH1	Mocos	MOCOS_MOUSE	TB_24H-MOCK_24H	-0.231937	0.0314123	0.140025	no	-0.231937	0.140025	Molybdenum cofactor sulfurase (MCS) (MOS) (MoCo sulfurase) (EC 2.8.1.9) (Molybdenum cofactor sulfurtransferase)
Q9Z223	Mocs2	MOC2B_MOUSE	TB_24H-MOCK_24H	0.176156	0.44326	0.72203	no	0.176156	0.72203	Molybdopterin synthase catalytic subunit (EC 2.8.1.12) (Molybdenum cofactor synthesis protein 2 large subunit) (Molybdenum cofactor synthesis protein 2B) (MOCS2B)
A2BDX3	Mocs3	MOCS3_MOUSE	TB_24H-MOCK_24H	-1.52069	0.0252601	0.120443	no	-1.52069	0.120443	Adenylyltransferase and sulfurtransferase MOCS3 (Molybdenum cofactor synthesis protein 3) [Includes: Molybdopterin-synthase adenylyltransferase (EC 2.7.7.80) (Adenylyltransferase MOCS3) (Sulfur carrier protein MOCS2A adenylyltransferase); Molybdopterin-synthase sulfurtransferase (EC 2.8.1.11) (Sulfur carrier protein MOCS2A sulfurtransferase) (Sulfurtransferase MOCS3)]
Q80UM7	Mogs	MOGS_MOUSE	TB_24H-MOCK_24H	-0.514503	0.0498413	0.191404	no	-0.514503	0.191404	Mannosyl-oligosaccharide glucosidase (EC 3.2.1.106) (Glucosidase 1) (Glycoprotein-processing glucosidase I)
Q80TL7	Mon2	MON2_MOUSE	TB_24H-MOCK_24H	-0.619479	0.0794538	0.263288	no	-0.619479	0.263288	Protein MON2 homolog (Protein SF21)
F7BJB9	Morc3	MORC3_MOUSE	TB_24H-MOCK_24H	1.21878	0.00570391	0.0398553	no	1.21878	0.0398553	MORC family CW-type zinc finger protein 3 (Nuclear matrix protein 2) (Zinc finger CW-type coiled-coil domain protein 3)
P60762	Morf4l1	MO4L1_MOUSE	TB_24H-MOCK_24H	-0.878488	0.00224565	0.0196672	no	-0.878488	0.0196672	Mortality factor 4-like protein 1 (MORF-related gene 15 protein) (Testis-expressed gene 189 protein) (Transcription factor-like protein MRG15)
Q9R0Q4	Morf4l2	MO4L2_MOUSE	TB_24H-MOCK_24H	0.612895	0.00653024	0.0438103	no	0.612895	0.0438103	Mortality factor 4-like protein 2 (MORF-related gene X protein) (Sid 393) (Transcription factor-like protein MRGX)
Q9CWP6	Mospd2	MSPD2_MOUSE	TB_24H-MOCK_24H	-0.0470495	0.819101	0.924048	no	-0.0470495	0.924048	Motile sperm domain-containing protein 2
P23249	Mov10	MOV10_MOUSE	TB_24H-MOCK_24H	0.913336	0.0315193	0.140118	no	0.913336	0.140118	Putative helicase MOV-10 (EC 3.6.4.13) (Moloney leukemia virus 10 protein)
P56379	Mp68	68MP_MOUSE	TB_24H-MOCK_24H	-0.662169	0.384564	0.668338	no	-0.662169	0.668338	6.8 kDa mitochondrial proteolipid
Q9D023	Mpc2	MPC2_MOUSE	TB_24H-MOCK_24H	-0.605842	0.0723353	0.24714	no	-0.605842	0.24714	Mitochondrial pyruvate carrier 2 (Brain protein 44)
A1L314	Mpeg1	MPEG1_MOUSE	TB_24H-MOCK_24H	0.876814	0.000216114	0.00290478	no	0.876814	0.00290478	Macrophage-expressed gene 1 protein (Macrophage gene 1 protein) (Mpg-1) (Protein MPS1)
P70290	Mpp1	EM55_MOUSE	TB_24H-MOCK_24H	0.307452	0.00367628	0.0282358	no	0.307452	0.0282358	55 kDa erythrocyte membrane protein (p55) (Membrane protein, palmitoylated 1)
Q99J99	Mpst	THTM_MOUSE	TB_24H-MOCK_24H	-0.589088	0.00231081	0.0199224	no	-0.589088	0.0199224	3-mercaptopyruvate sulfurtransferase (MST) (EC 2.8.1.2)
P19258	Mpv17	MPV17_MOUSE	TB_24H-MOCK_24H	-0.42323	0.25325	0.535115	no	-0.42323	0.535115	Protein Mpv17 (Mpv-17)
Q61830	Mrc1	MRC1_MOUSE	TB_24H-MOCK_24H	-0.563414	0.00953874	0.0587449	no	-0.563414	0.0587449	Macrophage mannose receptor 1 (MMR) (CD antigen CD206)
Q9CQT1	Mri1	MTNA_MOUSE	TB_24H-MOCK_24H	-0.62212	2.24021e-05	0.000427185	no	-0.62212	0.000427185	Methylthioribose-1-phosphate isomerase (M1Pi) (MTR-1-P isomerase) (EC 5.3.1.23) (S-methyl-5-thioribose-1-phosphate isomerase) (Translation initiation factor eIF-2B subunit alpha/beta/delta-like protein)
Q3TBW2	Mrpl10	RM10_MOUSE	TB_24H-MOCK_24H	-0.158194	0.716186	0.876496	no	-0.158194	0.876496	39S ribosomal protein L10, mitochondrial (L10mt) (MRP-L10)
Q9DB15	Mrpl12	RM12_MOUSE	TB_24H-MOCK_24H	-0.0118318	0.965431	0.987436	no	-0.0118318	0.987436	39S ribosomal protein L12, mitochondrial (L12mt) (MRP-L12)
Q9D1P0	Mrpl13	RM13_MOUSE	TB_24H-MOCK_24H	-0.225985	0.664959	0.849188	no	-0.225985	0.849188	39S ribosomal protein L13, mitochondrial (L13mt) (MRP-L13)
Q9D1I6	Mrpl14	RM14_MOUSE	TB_24H-MOCK_24H	-0.284092	0.399452	0.679733	no	-0.284092	0.679733	39S ribosomal protein L14, mitochondrial (L14mt) (MRP-L14)
Q9CPR5	Mrpl15	RM15_MOUSE	TB_24H-MOCK_24H	-0.372144	0.15142	0.402298	no	-0.372144	0.402298	39S ribosomal protein L15, mitochondrial (L15mt) (MRP-L15)
Q9D773	Mrpl2	RM02_MOUSE	TB_24H-MOCK_24H	-0.654931	0.379254	0.664596	no	-0.654931	0.664596	39S ribosomal protein L2, mitochondrial (L2mt) (MRP-L2)
Q9D1N9	Mrpl21	RM21_MOUSE	TB_24H-MOCK_24H	1.61901	1.00558e-07	3.70723e-06	no	1.61901	3.70723e-06	39S ribosomal protein L21, mitochondrial (L21mt) (MRP-L21)
O35972	Mrpl23	RM23_MOUSE	TB_24H-MOCK_24H	-0.347513	0.362058	0.65036	no	-0.347513	0.65036	39S ribosomal protein L23, mitochondrial (L23mt) (MRP-L23) (L23 mitochondrial-related protein)
Q9CQ06	Mrpl24	RM24_MOUSE	TB_24H-MOCK_24H	-0.922208	0.163496	0.418368	no	-0.922208	0.418368	39S ribosomal protein L24, mitochondrial (L24mt) (MRP-L24)
Q99N92	Mrpl27	RM27_MOUSE	TB_24H-MOCK_24H	-0.680433	0.0298761	0.134634	no	-0.680433	0.134634	39S ribosomal protein L27, mitochondrial (L27mt) (MRP-L27)
Q9D1B9	Mrpl28	RM28_MOUSE	TB_24H-MOCK_24H	-0.0389775	0.819023	0.924048	no	-0.0389775	0.924048	39S ribosomal protein L28, mitochondrial (L28mt) (MRP-L28)
Q99N95	Mrpl3	RM03_MOUSE	TB_24H-MOCK_24H	-0.0174736	0.956343	0.982572	no	-0.0174736	0.982572	39S ribosomal protein L3, mitochondrial (L3mt) (MRP-L3)
Q9D7N6	Mrpl30	RM30_MOUSE	TB_24H-MOCK_24H	-0.0956752	0.623808	0.8301	no	-0.0956752	0.8301	39S ribosomal protein L30, mitochondrial (L30mt) (MRP-L30)
Q921S7	Mrpl37	RM37_MOUSE	TB_24H-MOCK_24H	-0.166542	0.392628	0.673823	no	-0.166542	0.673823	39S ribosomal protein L37, mitochondrial (L37mt) (MRP-L37)
Q9JKF7	Mrpl39	RM39_MOUSE	TB_24H-MOCK_24H	0.258122	0.402166	0.680206	no	0.258122	0.680206	39S ribosomal protein L39, mitochondrial (L39mt) (MRP-L39)
Q9Z2Q5	Mrpl40	RM40_MOUSE	TB_24H-MOCK_24H	-0.505162	0.243118	0.523736	no	-0.505162	0.523736	39S ribosomal protein L40, mitochondrial (L40mt) (MRP-L40) (Nuclear localization signal-containing protein deleted in velocardiofacial syndrome homolog)
Q9CPV3	Mrpl42	RM42_MOUSE	TB_24H-MOCK_24H	-0.221645	0.262571	0.545871	no	-0.221645	0.545871	39S ribosomal protein L42, mitochondrial (L42mt) (MRP-L42) (28S ribosomal protein S32, mitochondrial) (MRP-S32) (S32mt) (39S ribosomal protein L31, mitochondrial) (L31mt) (MRP-L31)
Q99N89	Mrpl43	RM43_MOUSE	TB_24H-MOCK_24H	-0.852053	0.00489485	0.035024	no	-0.852053	0.035024	39S ribosomal protein L43, mitochondrial (L43mt) (MRP-L43) (Mitochondrial ribosomal protein bMRP36a)
Q9CY73	Mrpl44	RM44_MOUSE	TB_24H-MOCK_24H	-0.434611	0.180897	0.444886	no	-0.434611	0.444886	39S ribosomal protein L44, mitochondrial (L44mt) (MRP-L44) (EC 3.1.26.-)
Q9D0Q7	Mrpl45	RM45_MOUSE	TB_24H-MOCK_24H	-0.560887	0.0916488	0.287203	no	-0.560887	0.287203	39S ribosomal protein L45, mitochondrial (L45mt) (MRP-L45)
Q9EQI8	Mrpl46	RM46_MOUSE	TB_24H-MOCK_24H	-0.730058	0.0218576	0.108513	no	-0.730058	0.108513	39S ribosomal protein L46, mitochondrial (L46mt) (MRP-L46)
Q9CPY1	Mrpl51	RM51_MOUSE	TB_24H-MOCK_24H	-0.317146	0.35982	0.648447	no	-0.317146	0.648447	39S ribosomal protein L51, mitochondrial (L51mt) (MRP-L51) (bMRP-64) (bMRP64)
Q9D1H8	Mrpl53	RM53_MOUSE	TB_24H-MOCK_24H	0.0311561	0.918046	0.966218	no	0.0311561	0.966218	39S ribosomal protein L53, mitochondrial (L53mt) (MRP-L53)
Q8R035	Mrpl58	ICT1_MOUSE	TB_24H-MOCK_24H	-0.332487	0.533478	0.778986	no	-0.332487	0.778986	Peptidyl-tRNA hydrolase ICT1, mitochondrial (EC 3.1.1.29) (39S ribosomal protein L58, mitochondrial) (MRP-L58) (Immature colon carcinoma transcript 1 protein homolog)
Q99N94	Mrpl9	RM09_MOUSE	TB_24H-MOCK_24H	-0.76145	0.0786151	0.261443	no	-0.76145	0.261443	39S ribosomal protein L9, mitochondrial (L9mt) (MRP-L9)
Q9DCA2	Mrps11	RT11_MOUSE	TB_24H-MOCK_24H	-0.0948825	0.705893	0.872317	no	-0.0948825	0.872317	28S ribosomal protein S11, mitochondrial (MRP-S11) (S11mt)
O35680	Mrps12	RT12_MOUSE	TB_24H-MOCK_24H	0.347462	0.0648259	0.229379	no	0.347462	0.229379	28S ribosomal protein S12, mitochondrial (MRP-S12) (S12mt) (MT-RPS12)
Q99N84	Mrps18b	RT18B_MOUSE	TB_24H-MOCK_24H	-0.325603	0.331503	0.618387	no	-0.325603	0.618387	28S ribosomal protein S18b, mitochondrial (MRP-S18-b) (Mrps18-b) (S18mt-b) (28S ribosomal protein S18-2, mitochondrial) (MRP-S18-2)
Q924T2	Mrps2	RT02_MOUSE	TB_24H-MOCK_24H	-0.711001	0.0176088	0.0924879	no	-0.711001	0.0924879	28S ribosomal protein S2, mitochondrial (MRP-S2) (S2mt)
P58059	Mrps21	RT21_MOUSE	TB_24H-MOCK_24H	-0.705062	0.0642574	0.227904	no	-0.705062	0.227904	28S ribosomal protein S21, mitochondrial (MRP-S21) (S21mt)
Q8VE22	Mrps23	RT23_MOUSE	TB_24H-MOCK_24H	-0.391271	0.549948	0.788755	no	-0.391271	0.788755	28S ribosomal protein S23, mitochondrial (MRP-S23) (S23mt)
Q80ZS3	Mrps26	RT26_MOUSE	TB_24H-MOCK_24H	-0.241074	0.375606	0.661798	no	-0.241074	0.661798	28S ribosomal protein S26, mitochondrial (MRP-S26) (S26mt)
Q8BK72	Mrps27	RT27_MOUSE	TB_24H-MOCK_24H	-0.189446	0.458659	0.733477	no	-0.189446	0.733477	28S ribosomal protein S27, mitochondrial (MRP-S27) (S27mt)
Q9D0G0	Mrps30	RT30_MOUSE	TB_24H-MOCK_24H	0.0140508	0.982577	0.992839	no	0.0140508	0.992839	28S ribosomal protein S30, mitochondrial (MRP-S30) (S30mt)
Q9JIK9	Mrps34	RT34_MOUSE	TB_24H-MOCK_24H	-0.673629	0.012524	0.0722509	no	-0.673629	0.0722509	28S ribosomal protein S34, mitochondrial (MRP-S34) (S34mt) (T-complex expressed gene 2 protein)
Q8BJZ4	Mrps35	RT35_MOUSE	TB_24H-MOCK_24H	0.0170147	0.964571	0.987436	no	0.0170147	0.987436	28S ribosomal protein S35, mitochondrial (MRP-S35) (S35mt)
Q9CQX8	Mrps36	RT36_MOUSE	TB_24H-MOCK_24H	-0.567639	0.0253334	0.120474	no	-0.567639	0.120474	28S ribosomal protein S36, mitochondrial (MRP-S36) (S36mt)
Q80X85	Mrps7	RT07_MOUSE	TB_24H-MOCK_24H	-0.37448	0.427289	0.705947	no	-0.37448	0.705947	28S ribosomal protein S7, mitochondrial (MRP-S7) (S7mt)
Q9D7N3	Mrps9	RT09_MOUSE	TB_24H-MOCK_24H	-0.424847	0.17199	0.430642	no	-0.424847	0.430642	28S ribosomal protein S9, mitochondrial (MRP-S9) (S9mt)
Q9D0I8	Mrto4	MRT4_MOUSE	TB_24H-MOCK_24H	-1.07214	0.000469106	0.00538845	no	-1.07214	0.00538845	mRNA turnover protein 4 homolog (Ribosome assembly factor Mrto4)
Q99N09	Ms4a6b	M4A6B_MOUSE	TB_24H-MOCK_24H	2.65588	2.22045e-16	5.73023e-14	no	2.65588	5.73023e-14	Membrane-spanning 4-domains subfamily A member 6B
Q99N08	Ms4a6c	M4A6C_MOUSE	TB_24H-MOCK_24H	#NUM!		0	yes	8.04193	0.03509	Membrane-spanning 4-domains subfamily A member 6C
P43247	Msh2	MSH2_MOUSE	TB_24H-MOCK_24H	-1.18171	0.000135303	0.00192558	no	-1.18171	0.00192558	DNA mismatch repair protein Msh2 (MutS protein homolog 2)
P54276	Msh6	MSH6_MOUSE	TB_24H-MOCK_24H	-1.43801	7.98598e-08	3.00133e-06	no	-1.43801	3.00133e-06	DNA mismatch repair protein Msh6 (G/T mismatch-binding protein) (GTBP) (GTMBP) (MutS protein homolog 6) (MutS-alpha 160 kDa subunit) (p160)
P26041	Msn	MOES_MOUSE	TB_24H-MOCK_24H	0.290509	0.00693572	0.0455054	no	0.290509	0.0455054	Moesin (Membrane-organizing extension spike protein)
P30204	Msr1	MSRE_MOUSE	TB_24H-MOCK_24H	0.77476	1.69959e-06	4.41552e-05	no	0.77476	4.41552e-05	Macrophage scavenger receptor types I and II (Macrophage acetylated LDL receptor I and II) (Scavenger receptor type A) (SR-A) (CD antigen CD204)
Q9D6Y7	Msra	MSRA_MOUSE	TB_24H-MOCK_24H	-0.571215	0.101468	0.310499	no	-0.571215	0.310499	Mitochondrial peptide methionine sulfoxide reductase (EC 1.8.4.11) (Peptide-methionine (S)-S-oxide reductase) (Peptide Met(O) reductase) (Protein-methionine-S-oxide reductase) (PMSR)
Q2YDW2	Msto1	MSTO1_MOUSE	TB_24H-MOCK_24H	-0.418171	0.109373	0.327948	no	-0.418171	0.327948	Protein misato homolog 1
Q8K4B0	Mta1	MTA1_MOUSE	TB_24H-MOCK_24H	-0.353247	0.180389	0.444337	no	-0.353247	0.444337	Metastasis-associated protein MTA1
Q9R190	Mta2	MTA2_MOUSE	TB_24H-MOCK_24H	0.200141	0.162298	0.417179	no	0.200141	0.417179	Metastasis-associated protein MTA2 (Metastasis-associated 1-like 1)
Q9CQ65	Mtap	MTAP_MOUSE	TB_24H-MOCK_24H	-0.593588	0.000689723	0.00735514	no	-0.593588	0.00735514	S-methyl-5'-thioadenosine phosphorylase (EC 2.4.2.28) (5'-methylthioadenosine phosphorylase) (MTA phosphorylase) (MTAP) (MTAPase)
P03930	Mtatp8	ATP8_MOUSE	TB_24H-MOCK_24H	0.113289	0.63431	0.836105	no	0.113289	0.836105	ATP synthase protein 8 (A6L) (F-ATPase subunit 8)
Q791T5	Mtch1	MTCH1_MOUSE	TB_24H-MOCK_24H	-0.231456	0.599448	0.81524	no	-0.231456	0.81524	Mitochondrial carrier homolog 1 (Mitochondrial carrier-like protein 1)
Q791V5	Mtch2	MTCH2_MOUSE	TB_24H-MOCK_24H	-0.253638	0.183397	0.449607	no	-0.253638	0.449607	Mitochondrial carrier homolog 2
P00405	Mtco2	COX2_MOUSE	TB_24H-MOCK_24H	0.186021	0.518423	0.772261	no	0.186021	0.772261	Cytochrome c oxidase subunit 2 (Cytochrome c oxidase polypeptide II)
Q80WJ7	Mtdh	LYRIC_MOUSE	TB_24H-MOCK_24H	-0.0228479	0.855815	0.941653	no	-0.0228479	0.941653	Protein LYRIC (3D3/LYRIC) (Lysine-rich CEACAM1 co-isolated protein) (Metadherin) (Metastasis adhesion protein)
Q9CWE0	Mtfr1l	MFR1L_MOUSE	TB_24H-MOCK_24H	-0.497043	0.1142	0.339346	no	-0.497043	0.339346	Mitochondrial fission regulator 1-like
Q922D8	Mthfd1	C1TC_MOUSE	TB_24H-MOCK_24H	-0.516179	4.19538e-06	0.000100872	no	-0.516179	0.000100872	C-1-tetrahydrofolate synthase, cytoplasmic (C1-THF synthase) [Cleaved into: C-1-tetrahydrofolate synthase, cytoplasmic, N-terminally processed] [Includes: Methylenetetrahydrofolate dehydrogenase (EC 1.5.1.5); Methenyltetrahydrofolate cyclohydrolase (EC 3.5.4.9); Formyltetrahydrofolate synthetase (EC 6.3.4.3)]
Q3V3R1	Mthfd1l	C1TM_MOUSE	TB_24H-MOCK_24H	0.00692998	0.958847	0.984013	no	0.00692998	0.984013	Monofunctional C1-tetrahydrofolate synthase, mitochondrial (EC 6.3.4.3) (Formyltetrahydrofolate synthetase)
P18155	Mthfd2	MTDC_MOUSE	TB_24H-MOCK_24H	0.703294	0.349819	0.637547	no	0.703294	0.637547	Bifunctional methylenetetrahydrofolate dehydrogenase/cyclohydrolase, mitochondrial [Includes: NAD-dependent methylenetetrahydrofolate dehydrogenase (EC 1.5.1.15); Methenyltetrahydrofolate cyclohydrolase (EC 3.5.4.9)]
Q9D110	Mthfs	MTHFS_MOUSE	TB_24H-MOCK_24H	0.0167546	0.934464	0.974576	no	0.0167546	0.974576	5-formyltetrahydrofolate cyclo-ligase (EC 6.3.3.2) (5,10-methenyl-tetrahydrofolate synthetase) (MTHFS) (Methenyl-THF synthetase)
Q9Z2C5	Mtm1	MTM1_MOUSE	TB_24H-MOCK_24H	0.263086	0.515864	0.772261	no	0.263086	0.772261	Myotubularin (Phosphatidylinositol-3,5-bisphosphate 3-phosphatase) (EC 3.1.3.95) (Phosphatidylinositol-3-phosphate phosphatase) (EC 3.1.3.64)
Q9Z2C4	Mtmr1	MTMR1_MOUSE	TB_24H-MOCK_24H	-0.250387	0.345013	0.632062	no	-0.250387	0.632062	Myotubularin-related protein 1 (Phosphatidylinositol-3,5-bisphosphate 3-phosphatase) (EC 3.1.3.95) (Phosphatidylinositol-3-phosphate phosphatase) (EC 3.1.3.64)
Q7TPM9	Mtmr10	MTMRA_MOUSE	TB_24H-MOCK_24H	-0.0728578	0.807181	0.920624	no	-0.0728578	0.920624	Myotubularin-related protein 10
Q80TA6	Mtmr12	MTMRC_MOUSE	TB_24H-MOCK_24H	0.284713	0.311642	0.598818	no	0.284713	0.598818	Myotubularin-related protein 12
Q8K296	Mtmr3	MTMR3_MOUSE	TB_24H-MOCK_24H	0.303727	0.244122	0.52529	no	0.303727	0.52529	Myotubularin-related protein 3 (EC 3.1.3.48) (Phosphatidylinositol-3,5-bisphosphate 3-phosphatase) (EC 3.1.3.95) (Phosphatidylinositol-3-phosphate phosphatase) (EC 3.1.3.64)
Q8VE11	Mtmr6	MTMR6_MOUSE	TB_24H-MOCK_24H	0.0539993	0.643203	0.838601	no	0.0539993	0.838601	Myotubularin-related protein 6 (EC 3.1.3.-)
Q9Z2D0	Mtmr9	MTMR9_MOUSE	TB_24H-MOCK_24H	-0.293913	0.285387	0.568063	no	-0.293913	0.568063	Myotubularin-related protein 9
Q9JLN9	Mtor	MTOR_MOUSE	TB_24H-MOCK_24H	-0.644091	0.022177	0.109764	no	-0.644091	0.109764	Serine/threonine-protein kinase mTOR (EC 2.7.11.1) (FK506-binding protein 12-rapamycin complex-associated protein 1) (FKBP12-rapamycin complex-associated protein) (Mammalian target of rapamycin) (mTOR) (Mechanistic target of rapamycin) (Rapamycin target protein 1) (RAPT1)
P62774	Mtpn	MTPN_MOUSE	TB_24H-MOCK_24H	0.0594615	0.828093	0.928226	no	0.0594615	0.928226	Myotrophin (Granule cell differentiation protein) (Protein V-1)
Q8R1S4	Mtss1	MTSS1_MOUSE	TB_24H-MOCK_24H	-0.911506	1.73332e-07	6.04476e-06	no	-0.911506	6.04476e-06	Metastasis suppressor protein 1 (Missing in metastasis protein)
[truncated: 1,913 more rows]

## Sheet: 8h
Protein	Gene	Entry.name	Comparison	log2FC	pvalue	adj.pvalue	imputed	iLog2FC	iPvalue	Protein.names
A0A0B4J1G0	A0A0B4J1G0		TB_08H-MOCK_06H	0.492356	0.107971	0.299303	no	0.492356	0.299303
P58742	Aaas	AAAS_MOUSE	TB_08H-MOCK_06H	-0.789919	0.0966516	0.285274	no	-0.789919	0.285274	Aladin (Adracalin)
Q9D2R0	Aacs	AACS_MOUSE	TB_08H-MOCK_06H	-0.424678	0.000173665	0.00699492	no	-0.424678	0.00699492	Acetoacetyl-CoA synthetase (EC 6.2.1.16)
Q8R2R3	Aagab	AAGAB_MOUSE	TB_08H-MOCK_06H	-0.657968	0.0485412	0.202186	no	-0.657968	0.202186	Alpha- and gamma-adaptin-binding protein p34
Q3UHJ0	Aak1	AAK1_MOUSE	TB_08H-MOCK_06H	-0.342188	0.0242022	0.13806	no	-0.342188	0.13806	AP2-associated protein kinase 1 (EC 2.7.11.1) (Adaptor-associated kinase 1)
Q8BGQ7	Aars	SYAC_MOUSE	TB_08H-MOCK_06H	-0.284451	0.019052	0.124088	no	-0.284451	0.124088	Alanine--tRNA ligase, cytoplasmic (EC 6.1.1.7) (Alanyl-tRNA synthetase) (AlaRS)
Q3THG9	Aarsd1	AASD1_MOUSE	TB_08H-MOCK_06H	-0.0837534	0.839683	0.916637	no	-0.0837534	0.916637	Alanyl-tRNA editing protein Aarsd1 (Alanyl-tRNA deacylase alaX) (AlaX) (AlaXp-II) (Alanyl-tRNA synthetase domain-containing protein 1)
P41233	Abca1	ABCA1_MOUSE	TB_08H-MOCK_06H	-0.212425	0.495007	0.688008	no	-0.212425	0.688008	ATP-binding cassette sub-family A member 1 (ATP-binding cassette transporter 1) (ABC-1) (ATP-binding cassette 1)
P06795	Abcb1b	MDR1B_MOUSE	TB_08H-MOCK_06H	-0.33561	0.011449	0.0931898	no	-0.33561	0.0931898	Multidrug resistance protein 1B (EC 3.6.3.44) (ATP-binding cassette sub-family B member 1B) (P-glycoprotein 1) (CD antigen CD243)
Q9DC29	Abcb6	ABCB6_MOUSE	TB_08H-MOCK_06H	-0.281485	0.454172	0.658178	no	-0.281485	0.658178	ATP-binding cassette sub-family B member 6, mitochondrial
Q61102	Abcb7	ABCB7_MOUSE	TB_08H-MOCK_06H	-0.0137366	0.970352	0.98523	no	-0.0137366	0.98523	ATP-binding cassette sub-family B member 7, mitochondrial (ATP-binding cassette transporter 7) (ABC transporter 7 protein)
O35379	Abcc1	MRP1_MOUSE	TB_08H-MOCK_06H	-0.14285	0.631936	0.793739	no	-0.14285	0.793739	Multidrug resistance-associated protein 1 (ATP-binding cassette sub-family C member 1) (Leukotriene C(4) transporter) (LTC4 transporter)
B2RX12	Abcc3	MRP3_MOUSE	TB_08H-MOCK_06H	-0.98058	0.0131617	0.10264	no	-0.98058	0.10264	Canalicular multispecific organic anion transporter 2 (ATP-binding cassette sub-family C member 3) (Multidrug resistance-associated protein 3)
P48410	Abcd1	ABCD1_MOUSE	TB_08H-MOCK_06H	-0.652701	0.0512543	0.207543	no	-0.652701	0.207543	ATP-binding cassette sub-family D member 1 (Adrenoleukodystrophy protein) (ALDP)
P55096	Abcd3	ABCD3_MOUSE	TB_08H-MOCK_06H	-1.11449	0.0128168	0.101162	no	-1.11449	0.101162	ATP-binding cassette sub-family D member 3 (68 kDa peroxisomal membrane protein) (PMP68) (70 kDa peroxisomal membrane protein) (PMP70)
P61222	Abce1	ABCE1_MOUSE	TB_08H-MOCK_06H	-0.200677	0.333639	0.552241	no	-0.200677	0.552241	ATP-binding cassette sub-family E member 1 (RNase L inhibitor) (Ribonuclease 4 inhibitor) (RNS4I)
Q6P542	Abcf1	ABCF1_MOUSE	TB_08H-MOCK_06H	-0.147412	0.45636	0.659636	no	-0.147412	0.659636	ATP-binding cassette sub-family F member 1
Q99LE6	Abcf2	ABCF2_MOUSE	TB_08H-MOCK_06H	-0.303059	0.0581156	0.220444	no	-0.303059	0.220444	ATP-binding cassette sub-family F member 2
Q8K268	Abcf3	ABCF3_MOUSE	TB_08H-MOCK_06H	-0.368277	0.128002	0.32559	no	-0.368277	0.32559	ATP-binding cassette sub-family F member 3
Q99LR1	Abhd12	ABD12_MOUSE	TB_08H-MOCK_06H	-0.371354	0.0064	0.0659757	no	-0.371354	0.0659757	Monoacylglycerol lipase ABHD12 (EC 3.1.1.23) (2-arachidonoylglycerol hydrolase) (Abhydrolase domain-containing protein 12)
Q8VCR7	Abhd14b	ABHEB_MOUSE	TB_08H-MOCK_06H	-0.170424	0.276206	0.501226	no	-0.170424	0.501226	Protein ABHD14B (EC 3.-.-.-) (Alpha/beta hydrolase domain-containing protein 14B) (Abhydrolase domain-containing protein 14B) (CCG1-interacting factor B)
Q7M759	Abhd17b	AB17B_MOUSE	TB_08H-MOCK_06H	-0.553588	0.0462511	0.199012	no	-0.553588	0.199012	Protein ABHD17B (EC 3.-.-.-) (Alpha/beta hydrolase domain-containing protein 17B) (Abhydrolase domain-containing protein 17B)
[truncated: 3,902 more rows]

## Sheet: 6h
Protein	Gene	Entry.name	Comparison	log2FC	pvalue	adj.pvalue	imputed	iLog2FC	iPvalue	Protein.names
[truncated: 3,927 more rows]

[truncated: 2 more sheets: 4h, 2h]
