# Supplementary material for: Dynamic post-translational modification profiling of Mycobacterium tuberculosis-infected primary macrophages
Source: eLife. 2020 Jan 17;9:e51461. doi: 10.7554/eLife.51461 (PMC7030789; doi:10.7554/eLife.51461)
Supplement: Supplementary file 5. [file elife-51461-supp5.xlsx]

## Sheet: 2H
Protein	Gene	ProteinName	EntrezID	Uniprot_PTM	Comparison	log2FC	pvalue	adj.pvalue	imputed	iLog2FC	iPvalue
A1A5B6	Tbc1d25	TBC1 domain family, member 25	209815	A1A5B6_S560	TB_02H-MOCK_00H	0.239962	0.501383	0.843517	no	0.239962	0.501383
A2A432	Cul4b	cullin 4B	72584	A2A432_S104	TB_02H-MOCK_00H	0.295223	0.518144	0.849391	no	0.295223	0.518144
A2A432	Cul4b	cullin 4B	72584	A2A432_S149	TB_02H-MOCK_00H	-0.76074	0.0504521	0.318161	no	-0.76074	0.0504521
A2A4P0	Dhx8	DEAH (Asp-Glu-Ala-His) box polypeptide 8	217207	A2A4P0_S480	TB_02H-MOCK_00H	0.314195	0.658038	0.905393	no	0.314195	0.658038
A2A5R2	Arfgef2	ADP-ribosylation factor guanine nucleotide-exchange factor 2 (brefeldin A-inhibited)	99371	A2A5R2_S214;A2A5R2_S227	TB_02H-MOCK_00H	-0.419043	0.469702	0.828362	no	-0.419043	0.469702
A2A5R2	Arfgef2	ADP-ribosylation factor guanine nucleotide-exchange factor 2 (brefeldin A-inhibited)	99371	A2A5R2_S218;A2A5R2_S227	TB_02H-MOCK_00H	0.793575	0.467078	0.827186	no	0.793575	0.467078
A2A5R2	Arfgef2	ADP-ribosylation factor guanine nucleotide-exchange factor 2 (brefeldin A-inhibited)	99371	A2A5R2_S227	TB_02H-MOCK_00H	-0.678373	0.0160281	0.173715	no	-0.678373	0.0160281
A2A5R2	Arfgef2	ADP-ribosylation factor guanine nucleotide-exchange factor 2 (brefeldin A-inhibited)	99371	A2A5R2_S276	TB_02H-MOCK_00H	0.491927	0.462775	0.825445	no	0.491927	0.462775
A2A5R2	Arfgef2	ADP-ribosylation factor guanine nucleotide-exchange factor 2 (brefeldin A-inhibited)	99371	A2A5R2_S621	TB_02H-MOCK_00H	-0.0559485	0.898892	0.972932	no	-0.0559485	0.898892
A2A5R2	Arfgef2	ADP-ribosylation factor guanine nucleotide-exchange factor 2 (brefeldin A-inhibited)	99371	A2A5R2_S621;A2A5R2_T623	TB_02H-MOCK_00H	-3.39039	0.262414	0.695353	no	-3.39039	0.262414
A2A5R2	Arfgef2	ADP-ribosylation factor guanine nucleotide-exchange factor 2 (brefeldin A-inhibited)	99371	A2A5R2_S621;A2A5R2_T623;A2A5R2_S627	TB_02H-MOCK_00H	-0.215333	0.584804	0.875525	no	-0.215333	0.584804
A2A5R2	Arfgef2	ADP-ribosylation factor guanine nucleotide-exchange factor 2 (brefeldin A-inhibited)	99371	A2A5R2_S624;A2A5R2_S630	TB_02H-MOCK_00H	0.59256	0.205549	0.628364	no	0.59256	0.205549
A2A5R2	Arfgef2	ADP-ribosylation factor guanine nucleotide-exchange factor 2 (brefeldin A-inhibited)	99371	A2A5R2_T623;A2A5R2_S624	TB_02H-MOCK_00H	-0.347802	0.437822	0.81573	no	-0.347802	0.437822
A2A690	Tanc2	tetratricopeptide repeat, ankyrin repeat and coiled-coil containing 2	77097	A2A690_S1583	TB_02H-MOCK_00H	-0.719897	0.0219331	0.205678	no	-0.719897	0.0219331
A2A6A1	Gpatch8	G patch domain containing 8	237943	A2A6A1_S1037	TB_02H-MOCK_00H	-0.17765	0.790208	0.950446	no	-0.17765	0.790208
A2A791	Zmym4	zinc finger, MYM-type 4	67785	A2A791_S121	TB_02H-MOCK_00H	0.0673592	0.871528	0.968794	no	0.0673592	0.871528
A2A791	Zmym4	zinc finger, MYM-type 4	67785	A2A791_S1543;A2A791_S1548	TB_02H-MOCK_00H	-0.107945	0.884223	0.970483	no	-0.107945	0.884223
A2A7S8	C77080	expressed sequence C77080	97130	A2A7S8_S159	TB_02H-MOCK_00H	0.0945033	0.874978	0.969859	no	0.0945033	0.874978
A2A7S8	C77080	expressed sequence C77080	97130	A2A7S8_S323;A2A7S8_S325	TB_02H-MOCK_00H	-0.302684	0.687566	0.915686	no	-0.302684	0.687566
A2A7S8	C77080	expressed sequence C77080	97130	A2A7S8_S402	TB_02H-MOCK_00H	1.05613	0.00143689	0.039457	no	1.05613	0.00143689
A2A7S8	C77080	expressed sequence C77080	97130	A2A7S8_S445	TB_02H-MOCK_00H	0.380787	0.393308	0.803813	no	0.380787	0.393308
A2A7S8	C77080	expressed sequence C77080	97130	A2A7S8_S560	TB_02H-MOCK_00H	0.699734	0.0294802	0.241634	no	0.699734	0.0294802
A2A7S8	C77080	expressed sequence C77080	97130	A2A7S8_S610	TB_02H-MOCK_00H	0.408785	0.150482	0.54431	no	0.408785	0.150482
A2A7S8	C77080	expressed sequence C77080	97130	A2A7S8_S838	TB_02H-MOCK_00H	-0.0382744	0.944572	0.983514	no	-0.0382744	0.944572
A2A7S8	C77080	expressed sequence C77080	97130	A2A7S8_S838;A2A7S8_S842	TB_02H-MOCK_00H	0.0784975	0.842389	0.961384	no	0.0784975	0.842389
A2A7S8	C77080	expressed sequence C77080	97130	A2A7S8_S883;A2A7S8_S886	TB_02H-MOCK_00H	1.01786	0.0329835	0.258485	no	1.01786	0.0329835
A2A7S8	C77080	expressed sequence C77080	97130	A2A7S8_S886;A2A7S8_S889	TB_02H-MOCK_00H	0.833762	0.0784953	0.400961	no	0.833762	0.0784953
A2A7S8	C77080	expressed sequence C77080	97130	A2A7S8_S909	TB_02H-MOCK_00H	0.344814	0.351334	0.771679	no	0.344814	0.351334
A2A7S8	C77080	expressed sequence C77080	97130	A2A7S8_S952;A2A7S8_S959	TB_02H-MOCK_00H	0.585814	0.0645719	0.364786	no	0.585814	0.0645719
A2AAE1	4932438A13Rik	RIKEN cDNA 4932438A13 gene	229227	A2AAE1_S2755	TB_02H-MOCK_00H	0.048909	0.834022	0.959836	no	0.048909	0.834022
A2AAE1	4932438A13Rik	RIKEN cDNA 4932438A13 gene	229227	A2AAE1_S2898;A2AAE1_S2910	TB_02H-MOCK_00H	0.754502	0.0803481	0.405931	no	0.754502	0.0803481
A2AAY5	Sh3pxd2b	SH3 and PX domains 2B	268396	A2AAY5_S290	TB_02H-MOCK_00H	#NUM!		0	yes	8.14167	0.0156541
A2AAY5	Sh3pxd2b	SH3 and PX domains 2B	268396	A2AAY5_S291	TB_02H-MOCK_00H	1.37159	0.00803396	0.118025	no	1.37159	0.00803396
A2AAY5	Sh3pxd2b	SH3 and PX domains 2B	268396	A2AAY5_S339	TB_02H-MOCK_00H	-0.129589	0.88306	0.970277	no	-0.129589	0.88306
A2AAY5	Sh3pxd2b	SH3 and PX domains 2B	268396	A2AAY5_S767	TB_02H-MOCK_00H	0.0354082	0.943421	0.983097	no	0.0354082	0.943421
A2AAY5	Sh3pxd2b	SH3 and PX domains 2B	268396	A2AAY5_S768	TB_02H-MOCK_00H	0.136309	0.709009	0.922543	no	0.136309	0.709009
A2AAY5	Sh3pxd2b	SH3 and PX domains 2B	268396	A2AAY5_T766	TB_02H-MOCK_00H	-0.336041	0.409234	0.808847	no	-0.336041	0.409234
A2AB59	Arhgap27	Rho GTPase activating protein 27	544817	A2AB59_S118	TB_02H-MOCK_00H	#NUM!		0	yes	-4.39627	0.0396942
A2AB59	Arhgap27	Rho GTPase activating protein 27	544817	A2AB59_S215	TB_02H-MOCK_00H	0.409102	0.407272	0.808358	no	0.409102	0.407272
A2AB59	Arhgap27	Rho GTPase activating protein 27	544817	A2AB59_S458;A2AB59_S459	TB_02H-MOCK_00H	-0.186104	0.934271	0.981534	no	-0.186104	0.934271
A2AB59	Arhgap27	Rho GTPase activating protein 27	544817	A2AB59_S458;A2AB59_S462	TB_02H-MOCK_00H	-0.356079	0.455466	0.823788	no	-0.356079	0.455466
A2AB59	Arhgap27	Rho GTPase activating protein 27	544817	A2AB59_S458;A2AB59_S462;A2AB59_S469	TB_02H-MOCK_00H	-0.896349	0.241235	0.672357	no	-0.896349	0.241235
A2AB59	Arhgap27	Rho GTPase activating protein 27	544817	A2AB59_S459	TB_02H-MOCK_00H	-0.205127	0.551806	0.861822	no	-0.205127	0.551806
A2AB59	Arhgap27	Rho GTPase activating protein 27	544817	A2AB59_S459;A2AB59_S462	TB_02H-MOCK_00H	-0.32995	0.420931	0.810145	no	-0.32995	0.420931
A2AB59	Arhgap27	Rho GTPase activating protein 27	544817	A2AB59_S459;A2AB59_S462;A2AB59_S469	TB_02H-MOCK_00H	-0.108149	0.899837	0.972932	no	-0.108149	0.899837
A2AB59	Arhgap27	Rho GTPase activating protein 27	544817	A2AB59_S462;A2AB59_T464	TB_02H-MOCK_00H	-0.0649179	0.910945	0.976517	no	-0.0649179	0.910945
A2ADY9	Ddi2	DNA-damage inducible protein 2	68817	A2ADY9_S120	TB_02H-MOCK_00H	0.743205	0.0429296	0.299449	no	0.743205	0.0429296
A2ADY9	Ddi2	DNA-damage inducible protein 2	68817	A2ADY9_S121	TB_02H-MOCK_00H	0.857195	0.1611	0.567953	no	0.857195	0.1611
A2ADY9	Ddi2	DNA-damage inducible protein 2	68817	A2ADY9_T115	TB_02H-MOCK_00H	#NUM!		0	yes	6.77268	0.03892
A2AF47	Dock11	dedicator of cytokinesis 11	75974	A2AF47_S12	TB_02H-MOCK_00H	0.541968	0.458777	0.823925	no	0.541968	0.458777
A2AF47	Dock11	dedicator of cytokinesis 11	75974	A2AF47_S1237	TB_02H-MOCK_00H	-0.499851	0.548493	0.860975	no	-0.499851	0.548493
A2AF47	Dock11	dedicator of cytokinesis 11	75974	A2AF47_S1350	TB_02H-MOCK_00H	-0.30843	0.457134	0.823788	no	-0.30843	0.457134
A2AF47	Dock11	dedicator of cytokinesis 11	75974	A2AF47_S797	TB_02H-MOCK_00H	-0.854419	0.561185	0.865778	no	-0.854419	0.561185
A2AG58	Bclaf3	Bclaf1 and Thrap3 family member 3	382252	A2AG58_S201	TB_02H-MOCK_00H	1.01493	0.0179558	0.185486	no	1.01493	0.0179558
A2AG58	Bclaf3	Bclaf1 and Thrap3 family member 3	382252	A2AG58_S205	TB_02H-MOCK_00H	-0.0698698	0.88698	0.970483	no	-0.0698698	0.88698
A2AHC3	Camsap1	calmodulin regulated spectrin-associated protein 1	227634	A2AHC3_S1109	TB_02H-MOCK_00H	-0.218974	0.486522	0.834336	no	-0.218974	0.486522
A2AHC3	Camsap1	calmodulin regulated spectrin-associated protein 1	227634	A2AHC3_S502	TB_02H-MOCK_00H	#NUM!		0	yes	-5.96911	0.0150637
A2AHC3	Camsap1	calmodulin regulated spectrin-associated protein 1	227634	A2AHC3_S553;A2AHC3_T559	TB_02H-MOCK_00H	0.953489	0.0678965	0.372886	no	0.953489	0.0678965
A2AHC3	Camsap1	calmodulin regulated spectrin-associated protein 1	227634	A2AHC3_T1519;A2AHC3_T1521;A2AHC3_T1527	TB_02H-MOCK_00H	-0.408285	0.122765	0.494565	no	-0.408285	0.122765
A2AHC3	Camsap1	calmodulin regulated spectrin-associated protein 1	227634	A2AHC3_T559	TB_02H-MOCK_00H	0.00955644	0.958248	0.987454	no	0.00955644	0.958248
A2AIV2	Virma	vir like m6A methyltransferase associated	66185	A2AIV2_S138	TB_02H-MOCK_00H	-0.141232	0.802051	0.953448	no	-0.141232	0.802051
A2AIV2	Virma	vir like m6A methyltransferase associated	66185	A2AIV2_S1577	TB_02H-MOCK_00H	-0.302368	0.332484	0.757908	no	-0.302368	0.332484
A2AIV2	Virma	vir like m6A methyltransferase associated	66185	A2AIV2_S1578	TB_02H-MOCK_00H	0.120657	0.210967	0.635214	no	0.120657	0.210967
A2AIV8	Card9	caspase recruitment domain family, member 9	332579	A2AIV8_S425;A2AIV8_S430	TB_02H-MOCK_00H	0.384679	0.535803	0.858235	no	0.384679	0.535803
A2AIW0	Entr1	endosome associated trafficking regulator 1	68112	A2AIW0_S241;A2AIW0_S245	TB_02H-MOCK_00H	0.567263	0.1767	0.590801	no	0.567263	0.1767
A2AJ88	Pnpla7	patatin-like phospholipase domain containing 7	241274	A2AJ88_S341	TB_02H-MOCK_00H	1.13697	0.00132148	0.037392	no	1.13697	0.00132148
A2AJ88	Pnpla7	patatin-like phospholipase domain containing 7	241274	A2AJ88_S379	TB_02H-MOCK_00H	-0.232471	0.453195	0.823278	no	-0.232471	0.453195
A2AJI0	Map7d1	MAP7 domain containing 1	245877	A2AJI0_S114	TB_02H-MOCK_00H	1.02881	0.0197122	0.195354	no	1.02881	0.0197122
A2AJI0	Map7d1	MAP7 domain containing 1	245877	A2AJI0_S114;A2AJI0_S115	TB_02H-MOCK_00H	-1.34065	0.165085	0.574531	no	-1.34065	0.165085
A2AJI0	Map7d1	MAP7 domain containing 1	245877	A2AJI0_S115	TB_02H-MOCK_00H	0.411424	0.419126	0.80935	no	0.411424	0.419126
A2AJI0	Map7d1	MAP7 domain containing 1	245877	A2AJI0_S115;A2AJI0_S118	TB_02H-MOCK_00H	-0.318227	0.738546	0.932089	no	-0.318227	0.738546
A2AJI0	Map7d1	MAP7 domain containing 1	245877	A2AJI0_S115;A2AJI0_S118;A2AJI0_S125	TB_02H-MOCK_00H	-0.456632	0.592039	0.879817	no	-0.456632	0.592039
A2AJI0	Map7d1	MAP7 domain containing 1	245877	A2AJI0_S115;A2AJI0_T120;A2AJI0_S125	TB_02H-MOCK_00H	-2.6333	0.246371	0.676636	no	-2.6333	0.246371
A2AJI0	Map7d1	MAP7 domain containing 1	245877	A2AJI0_S115;A2AJI0_T121	TB_02H-MOCK_00H	1.01766	0.423477	0.810145	no	1.01766	0.423477
A2AJI0	Map7d1	MAP7 domain containing 1	245877	A2AJI0_S118	TB_02H-MOCK_00H	-0.593204	0.589185	0.878165	no	-0.593204	0.589185
A2AJI0	Map7d1	MAP7 domain containing 1	245877	A2AJI0_S118;A2AJI0_T120	TB_02H-MOCK_00H	-0.329699	0.357934	0.776736	no	-0.329699	0.357934
A2AJI0	Map7d1	MAP7 domain containing 1	245877	A2AJI0_S273	TB_02H-MOCK_00H	0.179473	0.679933	0.912164	no	0.179473	0.679933
A2AJI0	Map7d1	MAP7 domain containing 1	245877	A2AJI0_S313	TB_02H-MOCK_00H	#NUM!		0	yes	-5.06375	0.0311485
A2AJI0	Map7d1	MAP7 domain containing 1	245877	A2AJI0_S368	TB_02H-MOCK_00H	-0.637272	0.126583	0.50249	no	-0.637272	0.126583
A2AJI0	Map7d1	MAP7 domain containing 1	245877	A2AJI0_S368;A2AJI0_S370	TB_02H-MOCK_00H	#NUM!		0	yes	3.90965	0.0415755
A2AJI0	Map7d1	MAP7 domain containing 1	245877	A2AJI0_S370	TB_02H-MOCK_00H	-0.130694	0.866853	0.967916	no	-0.130694	0.866853
A2AJI0	Map7d1	MAP7 domain containing 1	245877	A2AJI0_S401	TB_02H-MOCK_00H	0.833155	0.374973	0.792056	no	0.833155	0.374973
A2AJI0	Map7d1	MAP7 domain containing 1	245877	A2AJI0_S448	TB_02H-MOCK_00H	-0.349608	0.433777	0.815196	no	-0.349608	0.433777
A2AJI0	Map7d1	MAP7 domain containing 1	245877	A2AJI0_S454	TB_02H-MOCK_00H	0.649708	0.130955	0.507707	no	0.649708	0.130955
A2AJI0	Map7d1	MAP7 domain containing 1	245877	A2AJI0_S460	TB_02H-MOCK_00H	#NUM!		0	yes	4.30398	0.0490501
A2AJI0	Map7d1	MAP7 domain containing 1	245877	A2AJI0_S544;A2AJI0_S548	TB_02H-MOCK_00H	-0.0573457	0.932095	0.981534	no	-0.0573457	0.932095
A2AJI0	Map7d1	MAP7 domain containing 1	245877	A2AJI0_S544;A2AJI0_S548;A2AJI0_S552	TB_02H-MOCK_00H	-1.29905	0.214142	0.638696	no	-1.29905	0.214142
A2AJI0	Map7d1	MAP7 domain containing 1	245877	A2AJI0_S78	TB_02H-MOCK_00H	0.951173	0.0569276	0.342007	no	0.951173	0.0569276
A2AJI0	Map7d1	MAP7 domain containing 1	245877	A2AJI0_T121	TB_02H-MOCK_00H	-2.37358	0.885905	0.970483	no	-2.37358	0.885905
A2AJI0	Map7d1	MAP7 domain containing 1	245877	A2AJI0_T40;A2AJI0_T49	TB_02H-MOCK_00H	1.03285	0.0743472	0.391196	no	1.03285	0.0743472
A2AJI0	Map7d1	MAP7 domain containing 1	245877	A2AJI0_T74	TB_02H-MOCK_00H	#NUM!		0	yes	7.68967	0.0117453
A2AJT4	A2AJT4			A2AJT4_S211	TB_02H-MOCK_00H	-0.76079	0.11233	0.477963	no	-0.76079	0.11233
A2AJT4	A2AJT4			A2AJT4_S290	TB_02H-MOCK_00H	0.487602	0.311448	0.739399	no	0.487602	0.311448
A2AKB9	Dcaf10	DDB1 and CUL4 associated factor 10	242418	A2AKB9_S356	TB_02H-MOCK_00H	0.446632	0.135964	0.515047	no	0.446632	0.135964
A2AM29	Mllt3	myeloid/lymphoid or mixed-lineage leukemia; translocated to, 3	70122	A2AM29_S489	TB_02H-MOCK_00H	-0.656781	0.20756	0.631225	no	-0.656781	0.20756
A2AN08	Ubr4	ubiquitin protein ligase E3 component n-recognin 4	69116	A2AN08_S2715	TB_02H-MOCK_00H	-0.031609	0.948274	0.983996	no	-0.031609	0.948274
A2AN08	Ubr4	ubiquitin protein ligase E3 component n-recognin 4	69116	A2AN08_S2716	TB_02H-MOCK_00H	0.372593	0.512555	0.846082	no	0.372593	0.512555
A2AN08	Ubr4	ubiquitin protein ligase E3 component n-recognin 4	69116	A2AN08_S2892;A2AN08_S2894	TB_02H-MOCK_00H	-0.532473	0.524444	0.853833	no	-0.532473	0.524444
A2AN08	Ubr4	ubiquitin protein ligase E3 component n-recognin 4	69116	A2AN08_S362	TB_02H-MOCK_00H	1.51343	5.18704e-06	0.000851326	no	1.51343	5.18704e-06
A2AN08	Ubr4	ubiquitin protein ligase E3 component n-recognin 4	69116	A2AN08_S362;A2AN08_S365	TB_02H-MOCK_00H	1.34446	0.00518108	0.0894609	no	1.34446	0.00518108
A2AN08	Ubr4	ubiquitin protein ligase E3 component n-recognin 4	69116	A2AN08_S3857	TB_02H-MOCK_00H	1.43587	0.0112844	0.143997	no	1.43587	0.0112844
A2AN08	Ubr4	ubiquitin protein ligase E3 component n-recognin 4	69116	A2AN08_S619	TB_02H-MOCK_00H	-0.198109	0.397107	0.805493	no	-0.198109	0.397107
A2AN08	Ubr4	ubiquitin protein ligase E3 component n-recognin 4	69116	A2AN08_S620	TB_02H-MOCK_00H	#NUM!		0	yes	-5.52253	0.0183639
A2AN08	Ubr4	ubiquitin protein ligase E3 component n-recognin 4	69116	A2AN08_T360	TB_02H-MOCK_00H	1.48127	0.000869644	0.0281574	no	1.48127	0.000869644
A2AN08	Ubr4	ubiquitin protein ligase E3 component n-recognin 4	69116	A2AN08_T363	TB_02H-MOCK_00H	#NUM!		0	yes	7.80783	0.0491117
A2APB8	Tpx2	TPX2, microtubule-associated	72119	A2APB8_S486	TB_02H-MOCK_00H	#NUM!		0	yes	-5.26443	0.0211125
A2APV2	Fmnl2	formin-like 2	71409	A2APV2_S171	TB_02H-MOCK_00H	-0.573725	0.230199	0.660263	no	-0.573725	0.230199
A2AR02	Ppig	peptidyl-prolyl isomerase G (cyclophilin G)	228005	A2AR02_S252;A2AR02_S254;A2AR02_S255	TB_02H-MOCK_00H	-1.81596	0.00224331	0.0536744	no	-1.81596	0.00224331
A2AR02	Ppig	peptidyl-prolyl isomerase G (cyclophilin G)	228005	A2AR02_S373	TB_02H-MOCK_00H	0.439859	0.545076	0.860369	no	0.439859	0.545076
A2AR02	Ppig	peptidyl-prolyl isomerase G (cyclophilin G)	228005	A2AR02_S411;A2AR02_S413	TB_02H-MOCK_00H	0.642844	0.809837	0.955098	no	0.642844	0.809837
A2AR50	Ralgps1	Ral GEF with PH domain and SH3 binding motif 1	241308	A2AR50_S297	TB_02H-MOCK_00H	-0.0556166	0.921769	0.978746	no	-0.0556166	0.921769
A2AR50	Ralgps1	Ral GEF with PH domain and SH3 binding motif 1	241308	A2AR50_S298	TB_02H-MOCK_00H	0.115464	0.757416	0.940926	no	0.115464	0.757416
A2ARZ3	A2ARZ3			A2ARZ3_S1851	TB_02H-MOCK_00H	#NUM!		0	yes	8.25168	0.0288929
A2ASS6	A2ASS6			A2ASS6_S11688	TB_02H-MOCK_00H	#NUM!		0	yes	4.71135	0.0166513
A2ASS6	A2ASS6			A2ASS6_S1429;A2ASS6_S1434	TB_02H-MOCK_00H	0.709466	0.781212	0.948177	no	0.709466	0.781212
A2ASS6	A2ASS6			A2ASS6_S28369;A2ASS6_T28377	TB_02H-MOCK_00H	0.525245	0.459618	0.824138	no	0.525245	0.459618
A2ASS6	A2ASS6			A2ASS6_T31377;A2ASS6_T31378;A2ASS6_T31383;A2ASS6_Y31385	TB_02H-MOCK_00H	#NUM!		0	yes	-8.40003	0.0195303
A2AWA9	Rabgap1	RAB GTPase activating protein 1	227800	A2AWA9_S37	TB_02H-MOCK_00H	1.72508	0.000249246	0.0117739	no	1.72508	0.000249246
A2AWA9	Rabgap1	RAB GTPase activating protein 1	227800	A2AWA9_S987	TB_02H-MOCK_00H	-0.36449	0.338569	0.761832	no	-0.36449	0.338569
A2AWA9	Rabgap1	RAB GTPase activating protein 1	227800	A2AWA9_S987;A2AWA9_T991	TB_02H-MOCK_00H	-0.420604	0.32358	0.749416	no	-0.420604	0.32358
A2AWA9	Rabgap1	RAB GTPase activating protein 1	227800	A2AWA9_T47	TB_02H-MOCK_00H	0.873474	0.0727566	0.3857	no	0.873474	0.0727566
A2AWT3	Atxn7l3	ataxin 7-like 3	217218	A2AWT3_S281	TB_02H-MOCK_00H	-0.339116	0.479985	0.830052	no	-0.339116	0.479985
A2BH40	Arid1a	AT rich interactive domain 1A (SWI-like)	93760	A2BH40_S1183	TB_02H-MOCK_00H	0.0242794	0.930583	0.981143	no	0.0242794	0.930583
A2BH40	Arid1a	AT rich interactive domain 1A (SWI-like)	93760	A2BH40_S1185	TB_02H-MOCK_00H	-0.183426	0.522848	0.853019	no	-0.183426	0.522848
A2BH40	Arid1a	AT rich interactive domain 1A (SWI-like)	93760	A2BH40_S365	TB_02H-MOCK_00H	-0.0104574	0.986344	0.995976	no	-0.0104574	0.986344
A2BH40	Arid1a	AT rich interactive domain 1A (SWI-like)	93760	A2BH40_S697	TB_02H-MOCK_00H	-0.443977	0.148494	0.540491	no	-0.443977	0.148494
A2BH40	Arid1a	AT rich interactive domain 1A (SWI-like)	93760	A2BH40_S697;A2BH40_S703	TB_02H-MOCK_00H	#NUM!		0	yes	4.80801	0.0314921
A2BH40	Arid1a	AT rich interactive domain 1A (SWI-like)	93760	A2BH40_S770	TB_02H-MOCK_00H	-0.485172	0.250121	0.682713	no	-0.485172	0.250121
A3KGS3	Ralgapa2	Ral GTPase activating protein, alpha subunit 2 (catalytic)	241694	A3KGS3_S486	TB_02H-MOCK_00H	0.139666	0.469268	0.828362	no	0.139666	0.469268
A3KGS3	Ralgapa2	Ral GTPase activating protein, alpha subunit 2 (catalytic)	241694	A3KGS3_S696	TB_02H-MOCK_00H	-0.204478	0.543691	0.860369	no	-0.204478	0.543691
A3KGS3	Ralgapa2	Ral GTPase activating protein, alpha subunit 2 (catalytic)	241694	A3KGS3_S763	TB_02H-MOCK_00H	#NUM!		0	yes	10.1802	0.0460762
A3KGS3	Ralgapa2	Ral GTPase activating protein, alpha subunit 2 (catalytic)	241694	A3KGS3_S765	TB_02H-MOCK_00H	-0.200766	0.455469	0.823788	no	-0.200766	0.455469
A3KGS3	Ralgapa2	Ral GTPase activating protein, alpha subunit 2 (catalytic)	241694	A3KGS3_S818;A3KGS3_S819	TB_02H-MOCK_00H	0.430627	0.52217	0.852671	no	0.430627	0.52217
A3KGS3	Ralgapa2	Ral GTPase activating protein, alpha subunit 2 (catalytic)	241694	A3KGS3_S819;A3KGS3_S820	TB_02H-MOCK_00H	1.95438	0.042879	0.299417	no	1.95438	0.042879
A3KGS3	Ralgapa2	Ral GTPase activating protein, alpha subunit 2 (catalytic)	241694	A3KGS3_S820	TB_02H-MOCK_00H	0.446222	0.543149	0.860369	no	0.446222	0.543149
A6H5X4	Phf11d	PHD finger protein 11D	219132	A6H5X4_S17	TB_02H-MOCK_00H	-1.11185	0.00613658	0.0990989	no	-1.11185	0.00613658
A6H5X4	Phf11d	PHD finger protein 11D	219132	A6H5X4_S170	TB_02H-MOCK_00H	#NUM!		0	yes	5.07916	0.0383949
A6H5X4	Phf11d	PHD finger protein 11D	219132	A6H5X4_S323	TB_02H-MOCK_00H	-0.381657	0.364358	0.782588	no	-0.381657	0.364358
A6H5X4	Phf11d	PHD finger protein 11D	219132	A6H5X4_S326	TB_02H-MOCK_00H	-0.108399	0.77085	0.943772	no	-0.108399	0.77085
A6H5X4	Phf11d	PHD finger protein 11D	219132	A6H5X4_S336	TB_02H-MOCK_00H	-0.684506	0.197177	0.617448	no	-0.684506	0.197177
A6H619	Phrf1	PHD and ring finger domains 1	101471	A6H619_S867	TB_02H-MOCK_00H	-0.539237	0.0327059	0.257065	no	-0.539237	0.0327059
A6H619	Phrf1	PHD and ring finger domains 1	101471	A6H619_S914	TB_02H-MOCK_00H	0.329559	0.419187	0.80935	no	0.329559	0.419187
A6H8H2	Dennd4c	DENN/MADD domain containing 4C	329877	A6H8H2_S1043	TB_02H-MOCK_00H	0.217992	0.532609	0.857126	no	0.217992	0.532609
A6H8H2	Dennd4c	DENN/MADD domain containing 4C	329877	A6H8H2_S1058	TB_02H-MOCK_00H	0.492042	0.324896	0.751858	no	0.492042	0.324896
A6H8H2	Dennd4c	DENN/MADD domain containing 4C	329877	A6H8H2_S1087	TB_02H-MOCK_00H	#NUM!		0	yes	7.21388	0.0484154
A6H8H2	Dennd4c	DENN/MADD domain containing 4C	329877	A6H8H2_S1096	TB_02H-MOCK_00H	-0.202562	0.85725	0.965522	no	-0.202562	0.85725
A6H8H2	Dennd4c	DENN/MADD domain containing 4C	329877	A6H8H2_S1215	TB_02H-MOCK_00H	0.908199	0.0206082	0.199878	no	0.908199	0.0206082
A6H8H2	Dennd4c	DENN/MADD domain containing 4C	329877	A6H8H2_S1221	TB_02H-MOCK_00H	0.723963	0.10303	0.459991	no	0.723963	0.10303
A6H8H2	Dennd4c	DENN/MADD domain containing 4C	329877	A6H8H2_S1240	TB_02H-MOCK_00H	#NUM!		0	yes	6.12664	0.0161051
A6H8H2	Dennd4c	DENN/MADD domain containing 4C	329877	A6H8H2_S1246	TB_02H-MOCK_00H	0.403557	0.629879	0.896366	no	0.403557	0.629879
A6H8H2	Dennd4c	DENN/MADD domain containing 4C	329877	A6H8H2_S1261	TB_02H-MOCK_00H	1.19588	0.373244	0.791229	no	1.19588	0.373244
A6H8H2	Dennd4c	DENN/MADD domain containing 4C	329877	A6H8H2_S1272	TB_02H-MOCK_00H	1.43628	0.000287752	0.0129151	no	1.43628	0.000287752
A6H8H2	Dennd4c	DENN/MADD domain containing 4C	329877	A6H8H2_S1310	TB_02H-MOCK_00H	0.474181	0.593598	0.880005	no	0.474181	0.593598
A6H8H2	Dennd4c	DENN/MADD domain containing 4C	329877	A6H8H2_S1321	TB_02H-MOCK_00H	-0.782351	0.214397	0.638802	no	-0.782351	0.214397
A6H8H2	Dennd4c	DENN/MADD domain containing 4C	329877	A6H8H2_S1620	TB_02H-MOCK_00H	#NUM!		0	yes	7.05031	0.0231946
A6H8H2	Dennd4c	DENN/MADD domain containing 4C	329877	A6H8H2_S720	TB_02H-MOCK_00H	-0.785257	0.0100303	0.134039	no	-0.785257	0.0100303
A6H8H2	Dennd4c	DENN/MADD domain containing 4C	329877	A6H8H2_S971	TB_02H-MOCK_00H	-0.0601034	0.869993	0.968794	no	-0.0601034	0.869993
A6H8H2	Dennd4c	DENN/MADD domain containing 4C	329877	A6H8H2_T1082	TB_02H-MOCK_00H	1.4887	0.000369096	0.0152465	no	1.4887	0.000369096
A6H8H2	Dennd4c	DENN/MADD domain containing 4C	329877	A6H8H2_T1086	TB_02H-MOCK_00H	0.914229	0.00383755	0.0768454	no	0.914229	0.00383755
A6H8H2	Dennd4c	DENN/MADD domain containing 4C	329877	A6H8H2_T1094	TB_02H-MOCK_00H	1.13152	0.387649	0.799038	no	1.13152	0.387649
A6H8H2	Dennd4c	DENN/MADD domain containing 4C	329877	A6H8H2_T966;A6H8H2_S971	TB_02H-MOCK_00H	-0.756392	0.163118	0.57166	no	-0.756392	0.163118
A6H8H2	Dennd4c	DENN/MADD domain containing 4C	329877	A6H8H2_T966;A6H8H2_T973	TB_02H-MOCK_00H	1.43493	0.544052	0.860369	no	1.43493	0.544052
A6X8Z5	Arhgap31	Rho GTPase activating protein 31	12549	A6X8Z5_S1163	TB_02H-MOCK_00H	-0.0932394	0.77389	0.945427	no	-0.0932394	0.77389
A6X8Z5	Arhgap31	Rho GTPase activating protein 31	12549	A6X8Z5_S1413	TB_02H-MOCK_00H	0.606304	0.22481	0.653446	no	0.606304	0.22481
A6X8Z5	Arhgap31	Rho GTPase activating protein 31	12549	A6X8Z5_S323	TB_02H-MOCK_00H	0.0504662	0.82614	0.959836	no	0.0504662	0.82614
A6X8Z5	Arhgap31	Rho GTPase activating protein 31	12549	A6X8Z5_S346	TB_02H-MOCK_00H	-0.142867	0.706043	0.921144	no	-0.142867	0.706043
A6X8Z5	Arhgap31	Rho GTPase activating protein 31	12549	A6X8Z5_S464	TB_02H-MOCK_00H	0.183395	0.564379	0.866281	no	0.183395	0.564379
A6X8Z5	Arhgap31	Rho GTPase activating protein 31	12549	A6X8Z5_S765	TB_02H-MOCK_00H	0.455688	0.434762	0.815336	no	0.455688	0.434762
A6X919	Dpy19l1	dpy-19-like 1 (C. elegans)	244745	A6X919_S19	TB_02H-MOCK_00H	0.250606	0.326346	0.75251	no	0.250606	0.326346
A6X919	Dpy19l1	dpy-19-like 1 (C. elegans)	244745	A6X919_S22	TB_02H-MOCK_00H	-0.168087	0.570258	0.868532	no	-0.168087	0.570258
A6X919	Dpy19l1	dpy-19-like 1 (C. elegans)	244745	A6X919_S23	TB_02H-MOCK_00H	-0.188076	0.702495	0.92008	no	-0.188076	0.702495
A6X919	Dpy19l1	dpy-19-like 1 (C. elegans)	244745	A6X919_S28	TB_02H-MOCK_00H	-0.330342	0.640902	0.901169	no	-0.330342	0.640902
B1AVH7	Tbc1d2	TBC1 domain family, member 2	381605	B1AVH7_S903;B1AVH7_S922	TB_02H-MOCK_00H	-1.21326	0.0846255	0.416352	no	-1.21326	0.0846255
B1AVH7	Tbc1d2	TBC1 domain family, member 2	381605	B1AVH7_S914	TB_02H-MOCK_00H	0.291142	0.562494	0.866281	no	0.291142	0.562494
B1AVY7	Kif16b	kinesin family member 16B	16558	B1AVY7_S662	TB_02H-MOCK_00H	0.260229	0.606746	0.88516	no	0.260229	0.606746
B1AVY7	Kif16b	kinesin family member 16B	16558	B1AVY7_S838	TB_02H-MOCK_00H	-0.545369	0.064325	0.36434	no	-0.545369	0.064325
B1AXH1	Nhsl2	NHS-like 2	100042480	B1AXH1_S134	TB_02H-MOCK_00H	-0.0991654	0.703688	0.920523	no	-0.0991654	0.703688
B1AXH1	Nhsl2	NHS-like 2	100042480	B1AXH1_S170	TB_02H-MOCK_00H	-0.431107	0.0546737	0.33423	no	-0.431107	0.0546737
B1AXH1	Nhsl2	NHS-like 2	100042480	B1AXH1_S435	TB_02H-MOCK_00H	0.537544	0.590061	0.878517	no	0.537544	0.590061
B1AXH1	Nhsl2	NHS-like 2	100042480	B1AXH1_T447	TB_02H-MOCK_00H	-0.377091	0.645188	0.902016	no	-0.377091	0.645188
B1AY10	Nfx1	nuclear transcription factor, X-box binding 1	74164	B1AY10_S149;B1AY10_S151	TB_02H-MOCK_00H	0.9244	0.602433	0.883476	no	0.9244	0.602433
B1AY10	Nfx1	nuclear transcription factor, X-box binding 1	74164	B1AY10_S49;B1AY10_S50	TB_02H-MOCK_00H	-0.214523	0.618398	0.891048	no	-0.214523	0.618398
B1AY13	Usp24	ubiquitin specific peptidase 24	329908	B1AY13_S1138	TB_02H-MOCK_00H	0.332431	0.114197	0.48072	no	0.332431	0.114197
B1AY13	Usp24	ubiquitin specific peptidase 24	329908	B1AY13_S1282	TB_02H-MOCK_00H	0.663327	0.0448802	0.307459	no	0.663327	0.0448802
B1AY13	Usp24	ubiquitin specific peptidase 24	329908	B1AY13_S1296	TB_02H-MOCK_00H	1.5322	1.44553e-05	0.00171046	no	1.5322	1.44553e-05
B1AY13	Usp24	ubiquitin specific peptidase 24	329908	B1AY13_S1368	TB_02H-MOCK_00H	-0.0523617	0.956476	0.986645	no	-0.0523617	0.956476
B1AY13	Usp24	ubiquitin specific peptidase 24	329908	B1AY13_S2044	TB_02H-MOCK_00H	0.873289	0.00154909	0.0418318	no	0.873289	0.00154909
B1AZA5	Tmem245	transmembrane protein 245	242474	B1AZA5_S12	TB_02H-MOCK_00H	0.510005	0.36882	0.787637	no	0.510005	0.36882
B1AZA5	Tmem245	transmembrane protein 245	242474	B1AZA5_S323	TB_02H-MOCK_00H	0.142461	0.807301	0.95406	no	0.142461	0.807301
B1AZA5	Tmem245	transmembrane protein 245	242474	B1AZA5_S326	TB_02H-MOCK_00H	2.29522	0.0491524	0.315611	no	2.29522	0.0491524
B1AZA5	Tmem245	transmembrane protein 245	242474	B1AZA5_S327	TB_02H-MOCK_00H	#NUM!		0	yes	5.48826	0.0295255
B1AZA5	Tmem245	transmembrane protein 245	242474	B1AZA5_T331	TB_02H-MOCK_00H	#NUM!		0	yes	6.00494	0.0223334
B1AZI6	Thoc2	THO complex 2	331401	B1AZI6_S1199;B1AZI6_S1212	TB_02H-MOCK_00H	-0.271926	0.811875	0.956022	no	-0.271926	0.811875
B1AZI6	Thoc2	THO complex 2	331401	B1AZI6_S1217;B1AZI6_S1219	TB_02H-MOCK_00H	-0.711597	0.39363	0.803813	no	-0.711597	0.39363
B1AZI6	Thoc2	THO complex 2	331401	B1AZI6_S1390	TB_02H-MOCK_00H	0.925785	0.00854971	0.122558	no	0.925785	0.00854971
B1AZI6	Thoc2	THO complex 2	331401	B1AZI6_S1450	TB_02H-MOCK_00H	#NUM!		0	yes	6.10637	0.0331491
B1AZP2	Dlgap4	DLG associated protein 4	228836	B1AZP2_S973	TB_02H-MOCK_00H	0.324937	0.399712	0.805493	no	0.324937	0.399712
B2RQC6	Cad	carbamoyl-phosphate synthetase 2, aspartate transcarbamylase, and dihydroorotase	69719	B2RQC6_S1406	TB_02H-MOCK_00H	-3.05132	3.28213e-06	0.000689035	no	-3.05132	3.28213e-06
B2RQC6	Cad	carbamoyl-phosphate synthetase 2, aspartate transcarbamylase, and dihydroorotase	69719	B2RQC6_S1823	TB_02H-MOCK_00H	-0.79909	0.540634	0.860369	no	-0.79909	0.540634
B2RQC6	Cad	carbamoyl-phosphate synthetase 2, aspartate transcarbamylase, and dihydroorotase	69719	B2RQC6_S1859	TB_02H-MOCK_00H	0.0930617	0.922553	0.978746	no	0.0930617	0.922553
B2RRE7	Otud4	OTU domain containing 4	73945	B2RRE7_S1000	TB_02H-MOCK_00H	1.86454	8.01705e-05	0.00555052	no	1.86454	8.01705e-05
B2RRE7	Otud4	OTU domain containing 4	73945	B2RRE7_S1016;B2RRE7_S1017	TB_02H-MOCK_00H	-0.734444	0.427887	0.813284	no	-0.734444	0.427887
B2RRE7	Otud4	OTU domain containing 4	73945	B2RRE7_S970	TB_02H-MOCK_00H	0.559277	0.388363	0.799072	no	0.559277	0.388363
B2RUJ5	Apba1	amyloid beta (A4) precursor protein binding, family A, member 1	319924	B2RUJ5_T85;B2RUJ5_S87	TB_02H-MOCK_00H	-1.04687	0.19693	0.617448	no	-1.04687	0.19693
B2RUP2	Unc13d	unc-13 homolog D	70450	B2RUP2_S149	TB_02H-MOCK_00H	0.223604	0.394458	0.804684	no	0.223604	0.394458
B2RUR8	Otud7b	OTU domain containing 7B	229603	B2RUR8_S100	TB_02H-MOCK_00H	-0.325083	0.183588	0.601344	no	-0.325083	0.183588
B2RUR8	Otud7b	OTU domain containing 7B	229603	B2RUR8_S460;B2RUR8_S464	TB_02H-MOCK_00H	-0.325847	0.313813	0.740519	no	-0.325847	0.313813
B2RUR8	Otud7b	OTU domain containing 7B	229603	B2RUR8_S460;B2RUR8_T461	TB_02H-MOCK_00H	0.495914	0.802808	0.953759	no	0.495914	0.802808
B2RUR8	Otud7b	OTU domain containing 7B	229603	B2RUR8_S464	TB_02H-MOCK_00H	0.145617	0.862107	0.966645	no	0.145617	0.862107
B2RUR8	Otud7b	OTU domain containing 7B	229603	B2RUR8_S464;B2RUR8_S467	TB_02H-MOCK_00H	0.479349	0.463227	0.825445	no	0.479349	0.463227
B2RUR8	Otud7b	OTU domain containing 7B	229603	B2RUR8_S467	TB_02H-MOCK_00H	0.361604	0.536016	0.85826	no	0.361604	0.536016
B2RUR8	Otud7b	OTU domain containing 7B	229603	B2RUR8_S508	TB_02H-MOCK_00H	0.662345	0.165826	0.576185	no	0.662345	0.165826
B2RWS6	Ep300	E1A binding protein p300	328572	B2RWS6_S2312;B2RWS6_S2322	TB_02H-MOCK_00H	-0.501235	0.382734	0.79534	no	-0.501235	0.382734
B2RWS6	Ep300	E1A binding protein p300	328572	B2RWS6_S2317	TB_02H-MOCK_00H	#NUM!		0	yes	6.05392	0.0286301
B2RWS6	Ep300	E1A binding protein p300	328572	B2RWS6_S2323	TB_02H-MOCK_00H	-0.573768	0.346851	0.769624	no	-0.573768	0.346851
B2RWS6	Ep300	E1A binding protein p300	328572	B2RWS6_S497	TB_02H-MOCK_00H	0.0012612	0.998908	0.99983	no	0.0012612	0.998908
B2RX12	Abcc3	ATP-binding cassette, sub-family C (CFTR/MRP), member 3	76408	B2RX12_S903;B2RX12_S906	TB_02H-MOCK_00H	0.65911	0.209462	0.634109	no	0.65911	0.209462
B2RX12	Abcc3	ATP-binding cassette, sub-family C (CFTR/MRP), member 3	76408	B2RX12_S903;B2RX12_S907	TB_02H-MOCK_00H	#NUM!		0	yes	-5.36962	0.0284992
B2RX12	Abcc3	ATP-binding cassette, sub-family C (CFTR/MRP), member 3	76408	B2RX12_S904;B2RX12_S906	TB_02H-MOCK_00H	-0.11063	0.868049	0.96816	no	-0.11063	0.868049
B2RX12	Abcc3	ATP-binding cassette, sub-family C (CFTR/MRP), member 3	76408	B2RX12_S906	TB_02H-MOCK_00H	-0.275856	0.464991	0.826008	no	-0.275856	0.464991
B2RX12	Abcc3	ATP-binding cassette, sub-family C (CFTR/MRP), member 3	76408	B2RX12_S923	TB_02H-MOCK_00H	-0.611461	0.511797	0.846082	no	-0.611461	0.511797
B2RXS4	Plxnb2	plexin B2	140570	B2RXS4_S1568	TB_02H-MOCK_00H	#NUM!		0	yes	5.49024	0.0245947
B2RXS4	Plxnb2	plexin B2	140570	B2RXS4_S1574	TB_02H-MOCK_00H	#NUM!		0	yes	5.84005	0.0320087
B2RY04	Dock5	dedicator of cytokinesis 5	68813	B2RY04_S1765	TB_02H-MOCK_00H	0.275541	0.677462	0.91037	no	0.275541	0.677462
B2RY04	Dock5	dedicator of cytokinesis 5	68813	B2RY04_S1788;B2RY04_T1793	TB_02H-MOCK_00H	1.3879	0.0032876	0.0701498	no	1.3879	0.0032876
B2RY04	Dock5	dedicator of cytokinesis 5	68813	B2RY04_T1811	TB_02H-MOCK_00H	#NUM!		0	yes	8.75901	0.0494293
B2RY56	Rbm25	RNA binding motif protein 25	67039	B2RY56_S670	TB_02H-MOCK_00H	-0.129501	0.877184	0.9699	no	-0.129501	0.877184
B2RY56	Rbm25	RNA binding motif protein 25	67039	B2RY56_S672	TB_02H-MOCK_00H	0.586945	0.173004	0.585497	no	0.586945	0.173004
B7ZCC9	B7ZCC9			B7ZCC9_S1352	TB_02H-MOCK_00H	0.638563	0.779767	0.948096	no	0.638563	0.779767
B7ZCC9	B7ZCC9			B7ZCC9_S1546;B7ZCC9_T1550	TB_02H-MOCK_00H	-0.477047	0.426824	0.812451	no	-0.477047	0.426824
B7ZCC9	B7ZCC9			B7ZCC9_S427;B7ZCC9_S428	TB_02H-MOCK_00H	-0.843363	0.474541	0.828419	no	-0.843363	0.474541
B7ZCC9	B7ZCC9			B7ZCC9_T1238;B7ZCC9_S1241;B7ZCC9_T1245;B7ZCC9_T1249;B7ZCC9_S1255	TB_02H-MOCK_00H	0.224036	0.813761	0.956122	no	0.224036	0.813761
B7ZCC9	B7ZCC9			B7ZCC9_T1350;B7ZCC9_S1352	TB_02H-MOCK_00H	3.8348	0.00996743	0.133749	no	3.8348	0.00996743
B9EJ86	Osbpl8	oxysterol binding protein-like 8	237542	B9EJ86_S13	TB_02H-MOCK_00H	0.189281	0.654803	0.904492	no	0.189281	0.654803
B9EJ86	Osbpl8	oxysterol binding protein-like 8	237542	B9EJ86_S19	TB_02H-MOCK_00H	0.0866171	0.902722	0.973958	no	0.0866171	0.902722
B9EJ86	Osbpl8	oxysterol binding protein-like 8	237542	B9EJ86_S314	TB_02H-MOCK_00H	0.7746	0.0653945	0.366558	no	0.7746	0.0653945
B9EJ86	Osbpl8	oxysterol binding protein-like 8	237542	B9EJ86_S63	TB_02H-MOCK_00H	#NUM!		0	yes	8.70846	0.0478042
B9EJ86	Osbpl8	oxysterol binding protein-like 8	237542	B9EJ86_S65	TB_02H-MOCK_00H	0.378389	0.331717	0.757376	no	0.378389	0.331717
B9EJ86	Osbpl8	oxysterol binding protein-like 8	237542	B9EJ86_S65;B9EJ86_S68	TB_02H-MOCK_00H	-0.289295	0.702878	0.92008	no	-0.289295	0.702878
B9EJ86	Osbpl8	oxysterol binding protein-like 8	237542	B9EJ86_S798;B9EJ86_S807;B9EJ86_S814	TB_02H-MOCK_00H	#NUM!		0	yes	-6.45835	0.0440331
B9EJ86	Osbpl8	oxysterol binding protein-like 8	237542	B9EJ86_S799;B9EJ86_S807	TB_02H-MOCK_00H	-0.838392	0.546783	0.860369	no	-0.838392	0.546783
B9EJ86	Osbpl8	oxysterol binding protein-like 8	237542	B9EJ86_S799;B9EJ86_S807;B9EJ86_S808	TB_02H-MOCK_00H	0.41597	0.834935	0.959836	no	0.41597	0.834935
B9EJ86	Osbpl8	oxysterol binding protein-like 8	237542	B9EJ86_S799;B9EJ86_S807;B9EJ86_S810	TB_02H-MOCK_00H	-1.50636	0.346388	0.769122	no	-1.50636	0.346388
B9EJ86	Osbpl8	oxysterol binding protein-like 8	237542	B9EJ86_S799;B9EJ86_S808;B9EJ86_S810	TB_02H-MOCK_00H	#NUM!		0	yes	-9.3014	0.0481416
B9EJ86	Osbpl8	oxysterol binding protein-like 8	237542	B9EJ86_S807;B9EJ86_S808	TB_02H-MOCK_00H	#NUM!		0	yes	-6.92292	0.0478305
B9EJ86	Osbpl8	oxysterol binding protein-like 8	237542	B9EJ86_S807;B9EJ86_S808;B9EJ86_S810	TB_02H-MOCK_00H	0.342607	0.877332	0.9699	no	0.342607	0.877332
B9EJ86	Osbpl8	oxysterol binding protein-like 8	237542	B9EJ86_S807;B9EJ86_S810	TB_02H-MOCK_00H	-2.85072	0.24097	0.671909	no	-2.85072	0.24097
B9EJ86	Osbpl8	oxysterol binding protein-like 8	237542	B9EJ86_S808;B9EJ86_S810	TB_02H-MOCK_00H	-0.934608	0.272136	0.700302	no	-0.934608	0.272136
B9EJ86	Osbpl8	oxysterol binding protein-like 8	237542	B9EJ86_T54	TB_02H-MOCK_00H	0.1303	0.83638	0.959836	no	0.1303	0.83638
B9EKI3	Tmf1	TATA element modulatory factor 1	232286	B9EKI3_S340	TB_02H-MOCK_00H	0.287874	0.266379	0.695795	no	0.287874	0.266379
B9EKI3	Tmf1	TATA element modulatory factor 1	232286	B9EKI3_S653	TB_02H-MOCK_00H	0.278873	0.65256	0.903543	no	0.278873	0.65256
B9EKI3	Tmf1	TATA element modulatory factor 1	232286	B9EKI3_S7;B9EKI3_S10;B9EKI3_S11	TB_02H-MOCK_00H	-0.207194	0.643075	0.901169	no	-0.207194	0.643075
D0QMC3	Mndal	myeloid nuclear differentiation antigen like	100040462	D0QMC3_S276	TB_02H-MOCK_00H	0.0687475	0.834011	0.959836	no	0.0687475	0.834011
D3YXK1	Samd1	sterile alpha motif domain containing 1	666704	D3YXK1_S150	TB_02H-MOCK_00H	0.621495	0.161658	0.569301	no	0.621495	0.161658
D3YXK2	Safb	scaffold attachment factor B	224903	D3YXK2_S20	TB_02H-MOCK_00H	-1.00763	8.17922e-06	0.00120978	no	-1.00763	8.17922e-06
D3YXK2	Safb	scaffold attachment factor B	224903	D3YXK2_S366	TB_02H-MOCK_00H	1.15382	0.00272664	0.0616144	no	1.15382	0.00272664
D3YXK2	Safb	scaffold attachment factor B	224903	D3YXK2_S465	TB_02H-MOCK_00H	-0.440141	0.391021	0.802764	no	-0.440141	0.391021
D3YXK2	Safb	scaffold attachment factor B	224903	D3YXK2_S626	TB_02H-MOCK_00H	-0.936032	0.0138733	0.162681	no	-0.936032	0.0138733
D3YXK2	Safb	scaffold attachment factor B	224903	D3YXK2_S829	TB_02H-MOCK_00H	-0.802035	0.360314	0.779303	no	-0.802035	0.360314
D3YXK2	Safb	scaffold attachment factor B	224903	D3YXK2_T28	TB_02H-MOCK_00H	-1.21616	0.0142673	0.165216	no	-1.21616	0.0142673
D3YXK2	Safb	scaffold attachment factor B	224903	D3YXK2_T362	TB_02H-MOCK_00H	-0.909353	0.0870819	0.422932	no	-0.909353	0.0870819
D3YZP9	Ccdc6	coiled-coil domain containing 6	76551	D3YZP9_S233;D3YZP9_S237	TB_02H-MOCK_00H	1.16348	0.0168631	0.178737	no	1.16348	0.0168631
D3YZP9	Ccdc6	coiled-coil domain containing 6	76551	D3YZP9_S344;D3YZP9_S360	TB_02H-MOCK_00H	-0.937222	0.0787999	0.400961	no	-0.937222	0.0787999
D3YZP9	Ccdc6	coiled-coil domain containing 6	76551	D3YZP9_S356;D3YZP9_S360;D3YZP9_S364	TB_02H-MOCK_00H	0.363725	0.567507	0.867591	no	0.363725	0.567507
D3Z6Q9	D3Z6Q9			D3Z6Q9_S412	TB_02H-MOCK_00H	1.90439	0.0109033	0.141352	no	1.90439	0.0109033
D3Z6Q9	D3Z6Q9			D3Z6Q9_S420	TB_02H-MOCK_00H	0.382412	0.213508	0.638313	no	0.382412	0.213508
D3Z6Q9	D3Z6Q9			D3Z6Q9_S422	TB_02H-MOCK_00H	-0.76742	0.733076	0.930928	no	-0.76742	0.733076
D3Z6Q9	D3Z6Q9			D3Z6Q9_S430	TB_02H-MOCK_00H	1.25792	0.0984194	0.447985	no	1.25792	0.0984194
D3Z6Q9	D3Z6Q9			D3Z6Q9_S443	TB_02H-MOCK_00H	-0.0419218	0.887627	0.970483	no	-0.0419218	0.887627
E1U8D0	E1U8D0			E1U8D0_S1015	TB_02H-MOCK_00H	-0.107229	0.612298	0.888084	no	-0.107229	0.612298
E2JF22	E2JF22			E2JF22_S1385	TB_02H-MOCK_00H	1.8766	0.0011137	0.0338689	no	1.8766	0.0011137
E2JF22	E2JF22			E2JF22_S1646	TB_02H-MOCK_00H	0.239775	0.240683	0.671909	no	0.239775	0.240683
E2JF22	E2JF22			E2JF22_S1864	TB_02H-MOCK_00H	0.632677	0.609252	0.886637	no	0.632677	0.609252
E2JF22	E2JF22			E2JF22_T382	TB_02H-MOCK_00H	#NUM!		0	yes	5.62753	0.0377759
E9PVB5	Ttc17	tetratricopeptide repeat domain 17	74569	E9PVB5_Y78	TB_02H-MOCK_00H	#NUM!		0	yes	6.08571	0.0394862
E9PVX6	Mki67	antigen identified by monoclonal antibody Ki 67	17345	E9PVX6_S1152	TB_02H-MOCK_00H	0.676308	0.267479	0.695795	no	0.676308	0.267479
E9PVX6	Mki67	antigen identified by monoclonal antibody Ki 67	17345	E9PVX6_S125	TB_02H-MOCK_00H	-0.560087	0.338546	0.761832	no	-0.560087	0.338546
E9PVX6	Mki67	antigen identified by monoclonal antibody Ki 67	17345	E9PVX6_S287	TB_02H-MOCK_00H	0.12724	0.914863	0.977117	no	0.12724	0.914863
E9PVX6	Mki67	antigen identified by monoclonal antibody Ki 67	17345	E9PVX6_S2980	TB_02H-MOCK_00H	0.809082	0.421014	0.810145	no	0.809082	0.421014
E9PYL2	Prr12	proline rich 12	233210	E9PYL2_S1370;E9PYL2_S1372	TB_02H-MOCK_00H	-1.23879	0.0394687	0.286105	no	-1.23879	0.0394687
E9PYL2	Prr12	proline rich 12	233210	E9PYL2_S859	TB_02H-MOCK_00H	0.264242	0.455775	0.823788	no	0.264242	0.455775
E9PYL2	Prr12	proline rich 12	233210	E9PYL2_T1367;E9PYL2_S1370	TB_02H-MOCK_00H	-0.736693	0.236761	0.665878	no	-0.736693	0.236761
E9PYL2	Prr12	proline rich 12	233210	E9PYL2_T1555;E9PYL2_S1562	TB_02H-MOCK_00H	-0.0160832	0.965253	0.989563	no	-0.0160832	0.965253
E9Q1P8	Irf2bp2	interferon regulatory factor 2 binding protein 2	270110	E9Q1P8_S169	TB_02H-MOCK_00H	-0.005959	0.983654	0.995976	no	-0.005959	0.983654
E9Q1P8	Irf2bp2	interferon regulatory factor 2 binding protein 2	270110	E9Q1P8_S250	TB_02H-MOCK_00H	-0.410444	0.512775	0.846082	no	-0.410444	0.512775
E9Q1P8	Irf2bp2	interferon regulatory factor 2 binding protein 2	270110	E9Q1P8_S438;E9Q1P8_S439	TB_02H-MOCK_00H	-0.636556	0.326008	0.75251	no	-0.636556	0.326008
E9Q1P8	Irf2bp2	interferon regulatory factor 2 binding protein 2	270110	E9Q1P8_S438;E9Q1P8_S439;E9Q1P8_S443	TB_02H-MOCK_00H	0.537772	0.491364	0.836357	no	0.537772	0.491364
E9Q1P8	Irf2bp2	interferon regulatory factor 2 binding protein 2	270110	E9Q1P8_S438;E9Q1P8_S440	TB_02H-MOCK_00H	0.145084	0.857496	0.965522	no	0.145084	0.857496
E9Q1P8	Irf2bp2	interferon regulatory factor 2 binding protein 2	270110	E9Q1P8_S438;E9Q1P8_S440;E9Q1P8_S443	TB_02H-MOCK_00H	0.0795701	0.94988	0.984209	no	0.0795701	0.94988
E9Q1P8	Irf2bp2	interferon regulatory factor 2 binding protein 2	270110	E9Q1P8_S438;E9Q1P8_S443	TB_02H-MOCK_00H	-0.82879	0.142644	0.528661	no	-0.82879	0.142644
E9Q1P8	Irf2bp2	interferon regulatory factor 2 binding protein 2	270110	E9Q1P8_S439;E9Q1P8_S440	TB_02H-MOCK_00H	-0.695738	0.216256	0.641515	no	-0.695738	0.216256
E9Q1P8	Irf2bp2	interferon regulatory factor 2 binding protein 2	270110	E9Q1P8_S439;E9Q1P8_S440;E9Q1P8_S443	TB_02H-MOCK_00H	-0.653996	0.546349	0.860369	no	-0.653996	0.546349
E9Q1P8	Irf2bp2	interferon regulatory factor 2 binding protein 2	270110	E9Q1P8_S439;E9Q1P8_S443	TB_02H-MOCK_00H	0.661461	0.4958	0.838967	no	0.661461	0.4958
E9Q1P8	Irf2bp2	interferon regulatory factor 2 binding protein 2	270110	E9Q1P8_S440	TB_02H-MOCK_00H	#NUM!		0	yes	8.25068	0.0353168
E9Q1P8	Irf2bp2	interferon regulatory factor 2 binding protein 2	270110	E9Q1P8_S440;E9Q1P8_S443	TB_02H-MOCK_00H	0.239075	0.772772	0.94473	no	0.239075	0.772772
E9Q1P8	Irf2bp2	interferon regulatory factor 2 binding protein 2	270110	E9Q1P8_S71	TB_02H-MOCK_00H	0.848125	0.0563072	0.339618	no	0.848125	0.0563072
E9Q349	Wdr25	WD repeat domain 25	212198	E9Q349_Y7;E9Q349_S10	TB_02H-MOCK_00H	-0.442497	0.523555	0.853833	no	-0.442497	0.523555
E9Q394	Akap13	A kinase (PRKA) anchor protein 13	75547	E9Q394_S1812	TB_02H-MOCK_00H	#NUM!		0	yes	4.6517	0.0302551
E9Q394	Akap13	A kinase (PRKA) anchor protein 13	75547	E9Q394_S1819	TB_02H-MOCK_00H	#NUM!		0	yes	8.24528	0.0483516
E9Q394	Akap13	A kinase (PRKA) anchor protein 13	75547	E9Q394_S1869	TB_02H-MOCK_00H	0.266112	0.560218	0.865187	no	0.266112	0.560218
E9Q394	Akap13	A kinase (PRKA) anchor protein 13	75547	E9Q394_S1890;E9Q394_S1895	TB_02H-MOCK_00H	0.283856	0.563881	0.866281	no	0.283856	0.563881
E9Q394	Akap13	A kinase (PRKA) anchor protein 13	75547	E9Q394_S1892	TB_02H-MOCK_00H	-0.0171112	0.977348	0.993376	no	-0.0171112	0.977348
E9Q394	Akap13	A kinase (PRKA) anchor protein 13	75547	E9Q394_S1892;E9Q394_S1895	TB_02H-MOCK_00H	-0.43826	0.565585	0.866281	no	-0.43826	0.565585
E9Q394	Akap13	A kinase (PRKA) anchor protein 13	75547	E9Q394_S2530;E9Q394_S2531	TB_02H-MOCK_00H	-0.330211	0.53025	0.856055	no	-0.330211	0.53025
E9Q394	Akap13	A kinase (PRKA) anchor protein 13	75547	E9Q394_S2690	TB_02H-MOCK_00H	#NUM!		0	yes	5.15489	0.0138413
E9Q394	Akap13	A kinase (PRKA) anchor protein 13	75547	E9Q394_S2692	TB_02H-MOCK_00H	0.16403	0.530383	0.856055	no	0.16403	0.530383
E9Q394	Akap13	A kinase (PRKA) anchor protein 13	75547	E9Q394_T1818	TB_02H-MOCK_00H	0.553726	0.447791	0.819293	no	0.553726	0.447791
E9Q3L2	Pi4ka	phosphatidylinositol 4-kinase alpha	224020	E9Q3L2_S233	TB_02H-MOCK_00H	-1.25043	0.415325	0.809262	no	-1.25043	0.415325
E9Q3L2	Pi4ka	phosphatidylinositol 4-kinase alpha	224020	E9Q3L2_S259	TB_02H-MOCK_00H	-0.727099	0.195543	0.615275	no	-0.727099	0.195543
E9Q3L2	Pi4ka	phosphatidylinositol 4-kinase alpha	224020	E9Q3L2_S259;E9Q3L2_S260;E9Q3L2_S263	TB_02H-MOCK_00H	-0.90356	0.43103	0.81442	no	-0.90356	0.43103
E9Q3L2	Pi4ka	phosphatidylinositol 4-kinase alpha	224020	E9Q3L2_S259;E9Q3L2_S263	TB_02H-MOCK_00H	0.652953	0.220932	0.647957	no	0.652953	0.220932
E9Q3L2	Pi4ka	phosphatidylinositol 4-kinase alpha	224020	E9Q3L2_S260	TB_02H-MOCK_00H	#NUM!		0	yes	-6.26322	0.0379193
E9Q3L2	Pi4ka	phosphatidylinositol 4-kinase alpha	224020	E9Q3L2_S260;E9Q3L2_S262	TB_02H-MOCK_00H	0.815094	0.0441884	0.304961	no	0.815094	0.0441884
E9Q3L2	Pi4ka	phosphatidylinositol 4-kinase alpha	224020	E9Q3L2_S260;E9Q3L2_S263	TB_02H-MOCK_00H	1.71029	0.0214817	0.203617	no	1.71029	0.0214817
E9Q3L2	Pi4ka	phosphatidylinositol 4-kinase alpha	224020	E9Q3L2_T258	TB_02H-MOCK_00H	-1.38048	0.00503981	0.0889362	no	-1.38048	0.00503981
E9Q3L2	Pi4ka	phosphatidylinositol 4-kinase alpha	224020	E9Q3L2_T258;E9Q3L2_S259	TB_02H-MOCK_00H	-1.09657	0.0503714	0.318161	no	-1.09657	0.0503714
E9Q3L2	Pi4ka	phosphatidylinositol 4-kinase alpha	224020	E9Q3L2_T258;E9Q3L2_S259;E9Q3L2_S263	TB_02H-MOCK_00H	-0.926893	0.40066	0.805493	no	-0.926893	0.40066
E9Q3L2	Pi4ka	phosphatidylinositol 4-kinase alpha	224020	E9Q3L2_T258;E9Q3L2_S263	TB_02H-MOCK_00H	1.66269	0.00787552	0.116751	no	1.66269	0.00787552
E9Q3L2	Pi4ka	phosphatidylinositol 4-kinase alpha	224020	E9Q3L2_Y694;E9Q3L2_S695	TB_02H-MOCK_00H	0.00630578	0.989313	0.995976	no	0.00630578	0.989313
E9Q5F9	Setd2	SET domain containing 2	235626	E9Q5F9_S2053;E9Q5F9_S2058	TB_02H-MOCK_00H	-0.777355	0.134092	0.513038	no	-0.777355	0.134092
E9Q5F9	Setd2	SET domain containing 2	235626	E9Q5F9_S532	TB_02H-MOCK_00H	0.0170337	0.937778	0.981534	no	0.0170337	0.937778
E9Q5F9	Setd2	SET domain containing 2	235626	E9Q5F9_S614	TB_02H-MOCK_00H	0.120065	0.624602	0.892798	no	0.120065	0.624602
E9Q5F9	Setd2	SET domain containing 2	235626	E9Q5F9_S614;E9Q5F9_S618	TB_02H-MOCK_00H	#NUM!		0	yes	-9.02896	0.0207941
E9Q5F9	Setd2	SET domain containing 2	235626	E9Q5F9_S614;E9Q5F9_S624	TB_02H-MOCK_00H	0.644206	0.0934023	0.43977	no	0.644206	0.0934023
E9Q5F9	Setd2	SET domain containing 2	235626	E9Q5F9_T612	TB_02H-MOCK_00H	-0.032475	0.938293	0.981534	no	-0.032475	0.938293
E9Q5K9	Ythdc1	YTH domain containing 1	231386	E9Q5K9_S309	TB_02H-MOCK_00H	-0.0419184	0.841407	0.961186	no	-0.0419184	0.841407
E9Q5K9	Ythdc1	YTH domain containing 1	231386	E9Q5K9_S417	TB_02H-MOCK_00H	0.0226323	0.988572	0.995976	no	0.0226323	0.988572
E9Q634	Myo1e	myosin IE	71602	E9Q634_S1001	TB_02H-MOCK_00H	-0.46342	0.475637	0.828419	no	-0.46342	0.475637
E9Q634	Myo1e	myosin IE	71602	E9Q634_S1001;E9Q634_S1008	TB_02H-MOCK_00H	-0.436647	0.416886	0.80935	no	-0.436647	0.416886
E9Q634	Myo1e	myosin IE	71602	E9Q634_S1001;E9Q634_S1013	TB_02H-MOCK_00H	1.21946	0.361235	0.779853	no	1.21946	0.361235
E9Q634	Myo1e	myosin IE	71602	E9Q634_T1002;E9Q634_S1004	TB_02H-MOCK_00H	#NUM!		0	yes	5.57683	0.0386531
E9Q6J5	Bod1l	biorientation of chromosomes in cell division 1-like	665775	E9Q6J5_S1676	TB_02H-MOCK_00H	1.1733	0.000590212	0.0216084	no	1.1733	0.000590212
E9Q6J5	Bod1l	biorientation of chromosomes in cell division 1-like	665775	E9Q6J5_S2001	TB_02H-MOCK_00H	0.179067	0.513091	0.846082	no	0.179067	0.513091
E9Q6J5	Bod1l	biorientation of chromosomes in cell division 1-like	665775	E9Q6J5_S236	TB_02H-MOCK_00H	#NUM!		0	yes	4.94398	0.0216659
E9Q6J5	Bod1l	biorientation of chromosomes in cell division 1-like	665775	E9Q6J5_S2681	TB_02H-MOCK_00H	0.926976	0.0805863	0.40621	no	0.926976	0.0805863
E9Q6J5	Bod1l	biorientation of chromosomes in cell division 1-like	665775	E9Q6J5_S2981;E9Q6J5_T2982;E9Q6J5_S2983	TB_02H-MOCK_00H	-1.96556	0.127119	0.503524	no	-1.96556	0.127119
E9Q6J5	Bod1l	biorientation of chromosomes in cell division 1-like	665775	E9Q6J5_S480;E9Q6J5_S482	TB_02H-MOCK_00H	-1.0308	0.21878	0.645723	no	-1.0308	0.21878
E9Q6J5	Bod1l	biorientation of chromosomes in cell division 1-like	665775	E9Q6J5_S656	TB_02H-MOCK_00H	0.117664	0.784789	0.948298	no	0.117664	0.784789
E9Q6J5	Bod1l	biorientation of chromosomes in cell division 1-like	665775	E9Q6J5_S795	TB_02H-MOCK_00H	0.0947359	0.824735	0.959777	no	0.0947359	0.824735
E9Q6J5	Bod1l	biorientation of chromosomes in cell division 1-like	665775	E9Q6J5_S896	TB_02H-MOCK_00H	0.438577	0.31527	0.742321	no	0.438577	0.31527
E9Q784	Zc3h13	zinc finger CCCH type containing 13	67302	E9Q784_S1069	TB_02H-MOCK_00H	0.379132	0.59899	0.882774	no	0.379132	0.59899
E9Q784	Zc3h13	zinc finger CCCH type containing 13	67302	E9Q784_S1086;E9Q784_S1090;E9Q784_S1093	TB_02H-MOCK_00H	-1.19389	0.473286	0.828419	no	-1.19389	0.473286
E9Q784	Zc3h13	zinc finger CCCH type containing 13	67302	E9Q784_S1086;E9Q784_S1093	TB_02H-MOCK_00H	-3.10782	1.05307e-05	0.00142778	no	-3.10782	1.05307e-05
E9Q784	Zc3h13	zinc finger CCCH type containing 13	67302	E9Q784_S1090;E9Q784_S1093	TB_02H-MOCK_00H	-2.46531	3.08276e-05	0.00270772	no	-2.46531	3.08276e-05
E9Q784	Zc3h13	zinc finger CCCH type containing 13	67302	E9Q784_S110	TB_02H-MOCK_00H	0.791748	0.409289	0.808847	no	0.791748	0.409289
E9Q784	Zc3h13	zinc finger CCCH type containing 13	67302	E9Q784_S1273;E9Q784_S1275	TB_02H-MOCK_00H	-0.00320472	0.998103	0.999485	no	-0.00320472	0.998103
E9Q784	Zc3h13	zinc finger CCCH type containing 13	67302	E9Q784_S204;E9Q784_S209	TB_02H-MOCK_00H	-0.445911	0.426078	0.811743	no	-0.445911	0.426078
E9Q784	Zc3h13	zinc finger CCCH type containing 13	67302	E9Q784_S207	TB_02H-MOCK_00H	1.64477	0.382015	0.795166	no	1.64477	0.382015
E9Q784	Zc3h13	zinc finger CCCH type containing 13	67302	E9Q784_S207;E9Q784_S209	TB_02H-MOCK_00H	-0.48229	0.206852	0.631128	no	-0.48229	0.206852
E9Q784	Zc3h13	zinc finger CCCH type containing 13	67302	E9Q784_S242	TB_02H-MOCK_00H	-0.627994	0.0585352	0.345687	no	-0.627994	0.0585352
E9Q784	Zc3h13	zinc finger CCCH type containing 13	67302	E9Q784_S316;E9Q784_S317	TB_02H-MOCK_00H	-0.418342	0.672722	0.91037	no	-0.418342	0.672722
E9Q784	Zc3h13	zinc finger CCCH type containing 13	67302	E9Q784_S316;E9Q784_S318	TB_02H-MOCK_00H	0.591322	0.494853	0.838455	no	0.591322	0.494853
E9Q784	Zc3h13	zinc finger CCCH type containing 13	67302	E9Q784_S369;E9Q784_S371;E9Q784_S379	TB_02H-MOCK_00H	-0.80954	0.0894385	0.429007	no	-0.80954	0.0894385
E9Q784	Zc3h13	zinc finger CCCH type containing 13	67302	E9Q784_S369;E9Q784_S371;E9Q784_S380	TB_02H-MOCK_00H	0.589018	0.3881	0.799038	no	0.589018	0.3881
E9Q784	Zc3h13	zinc finger CCCH type containing 13	67302	E9Q784_S953	TB_02H-MOCK_00H	0.0811437	0.769884	0.943772	no	0.0811437	0.769884
E9Q7F2	Rnf169	ring finger protein 169	108937	E9Q7F2_S277	TB_02H-MOCK_00H	-0.787601	0.223487	0.65193	no	-0.787601	0.223487
E9Q7F2	Rnf169	ring finger protein 169	108937	E9Q7F2_S44	TB_02H-MOCK_00H	-0.386729	0.422362	0.810145	no	-0.386729	0.422362
E9Q8D0	Dnajc21	DnaJ heat shock protein family (Hsp40) member C21	78244	E9Q8D0_S283	TB_02H-MOCK_00H	-0.710506	0.0913108	0.432497	no	-0.710506	0.0913108
E9Q8I9	Fry	FRY microtubule binding protein	320365	E9Q8I9_S1955	TB_02H-MOCK_00H	-0.582473	0.165648	0.575876	no	-0.582473	0.165648
F6ZDS4	Tpr	translocated promoter region, nuclear basket protein	108989	F6ZDS4_S2141	TB_02H-MOCK_00H	0.179293	0.557224	0.863481	no	0.179293	0.557224
F6ZDS4	Tpr	translocated promoter region, nuclear basket protein	108989	F6ZDS4_S2223	TB_02H-MOCK_00H	0.395019	0.137128	0.51735	no	0.395019	0.137128
F6ZDS4	Tpr	translocated promoter region, nuclear basket protein	108989	F6ZDS4_S720	TB_02H-MOCK_00H	#NUM!		0	yes	6.58966	0.0357697
F6ZDS4	Tpr	translocated promoter region, nuclear basket protein	108989	F6ZDS4_T2110	TB_02H-MOCK_00H	0.270782	0.317888	0.7448	no	0.270782	0.317888
G3X9J0	Sipa1l3	signal-induced proliferation-associated 1 like 3	74206	G3X9J0_S1538	TB_02H-MOCK_00H	0.0474947	0.833793	0.959836	no	0.0474947	0.833793
G3X9J0	Sipa1l3	signal-induced proliferation-associated 1 like 3	74206	G3X9J0_S164	TB_02H-MOCK_00H	-0.110125	0.690193	0.915841	no	-0.110125	0.690193
G3X9J0	Sipa1l3	signal-induced proliferation-associated 1 like 3	74206	G3X9J0_S166	TB_02H-MOCK_00H	#NUM!		0	yes	6.22398	0.0370724
G5E829	Atp2b1	ATPase, Ca++ transporting, plasma membrane 1	67972	G5E829_S1155	TB_02H-MOCK_00H	0.675271	0.111391	0.475678	no	0.675271	0.111391
G5E829	Atp2b1	ATPase, Ca++ transporting, plasma membrane 1	67972	G5E829_S1155;G5E829_T1165	TB_02H-MOCK_00H	-0.059646	0.875881	0.9699	no	-0.059646	0.875881
G5E829	Atp2b1	ATPase, Ca++ transporting, plasma membrane 1	67972	G5E829_S1177;G5E829_S1182	TB_02H-MOCK_00H	0.310965	0.634558	0.898347	no	0.310965	0.634558
G5E829	Atp2b1	ATPase, Ca++ transporting, plasma membrane 1	67972	G5E829_S1178;G5E829_S1182	TB_02H-MOCK_00H	0.451991	0.429855	0.81442	no	0.451991	0.429855
G5E829	Atp2b1	ATPase, Ca++ transporting, plasma membrane 1	67972	G5E829_S8	TB_02H-MOCK_00H	0.108559	0.81145	0.955995	no	0.108559	0.81145
G5E870	Trip12	thyroid hormone receptor interactor 12	14897	G5E870_S1409	TB_02H-MOCK_00H	0.55867	0.110491	0.475678	no	0.55867	0.110491
G5E870	Trip12	thyroid hormone receptor interactor 12	14897	G5E870_S310	TB_02H-MOCK_00H	-0.00498193	0.990086	0.995976	no	-0.00498193	0.990086
G5E870	Trip12	thyroid hormone receptor interactor 12	14897	G5E870_S312	TB_02H-MOCK_00H	0.14909	0.566604	0.866979	no	0.14909	0.566604
G5E870	Trip12	thyroid hormone receptor interactor 12	14897	G5E870_S75	TB_02H-MOCK_00H	0.580421	0.470888	0.828419	no	0.580421	0.470888
G5E870	Trip12	thyroid hormone receptor interactor 12	14897	G5E870_S77	TB_02H-MOCK_00H	-0.467697	0.148984	0.541563	no	-0.467697	0.148984
G5E870	Trip12	thyroid hormone receptor interactor 12	14897	G5E870_S77;G5E870_S85	TB_02H-MOCK_00H	0.15364	0.830635	0.959836	no	0.15364	0.830635
G5E870	Trip12	thyroid hormone receptor interactor 12	14897	G5E870_S77;G5E870_S87	TB_02H-MOCK_00H	-1.03977	0.000705295	0.0245458	no	-1.03977	0.000705295
G5E870	Trip12	thyroid hormone receptor interactor 12	14897	G5E870_T1459	TB_02H-MOCK_00H	0.42624	0.504391	0.844695	no	0.42624	0.504391
O08539	Bin1	bridging integrator 1	30948	O08539_S286	TB_02H-MOCK_00H	#NUM!		0	yes	7.04858	0.0302836
O08539	Bin1	bridging integrator 1	30948	O08539_S286;O08539_S296	TB_02H-MOCK_00H	-0.617077	0.710704	0.922887	no	-0.617077	0.710704
O08539	Bin1	bridging integrator 1	30948	O08539_S286;O08539_S296;O08539_S304	TB_02H-MOCK_00H	-1.55296	0.316609	0.743693	no	-1.55296	0.316609
O08539	Bin1	bridging integrator 1	30948	O08539_S286;O08539_S298	TB_02H-MOCK_00H	1.00251	0.416542	0.80935	no	1.00251	0.416542
O08539	Bin1	bridging integrator 1	30948	O08539_S286;O08539_S304	TB_02H-MOCK_00H	-0.0720962	0.958749	0.987454	no	-0.0720962	0.958749
O08539	Bin1	bridging integrator 1	30948	O08539_S296	TB_02H-MOCK_00H	0.261607	0.742788	0.934024	no	0.261607	0.742788
O08539	Bin1	bridging integrator 1	30948	O08539_S296;O08539_S298	TB_02H-MOCK_00H	0.19672	0.713631	0.922887	no	0.19672	0.713631
O08539	Bin1	bridging integrator 1	30948	O08539_S296;O08539_S298;O08539_S304	TB_02H-MOCK_00H	-0.0750241	0.93052	0.981143	no	-0.0750241	0.93052
O08539	Bin1	bridging integrator 1	30948	O08539_S296;O08539_S304	TB_02H-MOCK_00H	0.0360907	0.918747	0.977836	no	0.0360907	0.918747
O08539	Bin1	bridging integrator 1	30948	O08539_S298	TB_02H-MOCK_00H	-1.18833	0.0576624	0.344598	no	-1.18833	0.0576624
O08539	Bin1	bridging integrator 1	30948	O08539_S298;O08539_S304	TB_02H-MOCK_00H	0.224253	0.641065	0.901169	no	0.224253	0.641065
O08539	Bin1	bridging integrator 1	30948	O08539_S304	TB_02H-MOCK_00H	-0.685662	0.137029	0.517275	no	-0.685662	0.137029
O08539	Bin1	bridging integrator 1	30948	O08539_S324	TB_02H-MOCK_00H	0.336296	0.418541	0.80935	no	0.336296	0.418541
O08539	Bin1	bridging integrator 1	30948	O08539_S332	TB_02H-MOCK_00H	-0.351973	0.21025	0.634896	no	-0.351973	0.21025
O08547	Sec22b	SEC22 homolog B, vesicle trafficking protein	20333	O08547_S137	TB_02H-MOCK_00H	-1.62659	0.0109771	0.142026	no	-1.62659	0.0109771
O08550	Kmt2b	lysine (K)-specific methyltransferase 2B	75410	O08550_S1037;O08550_S1040	TB_02H-MOCK_00H	0.181687	0.633484	0.898195	no	0.181687	0.633484
O08550	Kmt2b	lysine (K)-specific methyltransferase 2B	75410	O08550_S1098;O08550_S1101	TB_02H-MOCK_00H	-0.547631	0.0874696	0.423463	no	-0.547631	0.0874696
O08550	Kmt2b	lysine (K)-specific methyltransferase 2B	75410	O08550_S866	TB_02H-MOCK_00H	0.0192478	0.964056	0.989495	no	0.0192478	0.964056
O08553	Dpysl2	dihydropyrimidinase-like 2	12934	O08553_S517	TB_02H-MOCK_00H	1.52354	0.0330414	0.258485	no	1.52354	0.0330414
O08553	Dpysl2	dihydropyrimidinase-like 2	12934	O08553_S517;O08553_S518	TB_02H-MOCK_00H	#NUM!		0	yes	-6.98665	0.0434853
O08553	Dpysl2	dihydropyrimidinase-like 2	12934	O08553_S522	TB_02H-MOCK_00H	0.452208	0.686255	0.915225	no	0.452208	0.686255
O08553	Dpysl2	dihydropyrimidinase-like 2	12934	O08553_S570	TB_02H-MOCK_00H	0.375543	0.391741	0.80323	no	0.375543	0.391741
O08553	Dpysl2	dihydropyrimidinase-like 2	12934	O08553_T509	TB_02H-MOCK_00H	0.101276	0.671526	0.910071	no	0.101276	0.671526
O08553	Dpysl2	dihydropyrimidinase-like 2	12934	O08553_T512;O08553_S522	TB_02H-MOCK_00H	-1.68863	0.255291	0.685604	no	-1.68863	0.255291
O08553	Dpysl2	dihydropyrimidinase-like 2	12934	O08553_T512;O08553_T521	TB_02H-MOCK_00H	-1.07238	0.0818151	0.408359	no	-1.07238	0.0818151
O08553	Dpysl2	dihydropyrimidinase-like 2	12934	O08553_T514	TB_02H-MOCK_00H	0.637795	0.253794	0.685065	no	0.637795	0.253794
O08553	Dpysl2	dihydropyrimidinase-like 2	12934	O08553_T514;O08553_S517	TB_02H-MOCK_00H	-1.28294	0.0920295	0.434951	no	-1.28294	0.0920295
O08553	Dpysl2	dihydropyrimidinase-like 2	12934	O08553_T514;O08553_S517;O08553_T521	TB_02H-MOCK_00H	-0.945198	0.250405	0.682713	no	-0.945198	0.250405
O08553	Dpysl2	dihydropyrimidinase-like 2	12934	O08553_T514;O08553_S518	TB_02H-MOCK_00H	3.28898	0.114925	0.482332	no	3.28898	0.114925
O08553	Dpysl2	dihydropyrimidinase-like 2	12934	O08553_T514;O08553_S522	TB_02H-MOCK_00H	#NUM!		0	yes	6.69151	0.0300611
O08553	Dpysl2	dihydropyrimidinase-like 2	12934	O08553_T521	TB_02H-MOCK_00H	-0.107378	0.851227	0.964231	no	-0.107378	0.851227
O08582	Gtpbp1	GTP binding protein 1	14904	O08582_S12;O08582_S24	TB_02H-MOCK_00H	-0.235528	0.723074	0.926697	no	-0.235528	0.723074
O08582	Gtpbp1	GTP binding protein 1	14904	O08582_S24	TB_02H-MOCK_00H	0.179748	0.745402	0.935051	no	0.179748	0.745402
O08582	Gtpbp1	GTP binding protein 1	14904	O08582_S6;O08582_S24	TB_02H-MOCK_00H	#NUM!		0	yes	-8.11392	0.0482121
O08582	Gtpbp1	GTP binding protein 1	14904	O08582_S8	TB_02H-MOCK_00H	-1.10142	0.00590514	0.0965595	no	-1.10142	0.00590514
O08582	Gtpbp1	GTP binding protein 1	14904	O08582_S8;O08582_S12;O08582_S25	TB_02H-MOCK_00H	0.371344	0.439057	0.816002	no	0.371344	0.439057
O08582	Gtpbp1	GTP binding protein 1	14904	O08582_S8;O08582_S24	TB_02H-MOCK_00H	0.614839	0.504263	0.844695	no	0.614839	0.504263
O08582	Gtpbp1	GTP binding protein 1	14904	O08582_S8;O08582_S25	TB_02H-MOCK_00H	-0.623492	0.638753	0.90076	no	-0.623492	0.638753
O08599	Stxbp1	syntaxin binding protein 1	20910	O08599_S506	TB_02H-MOCK_00H	#NUM!		0	yes	7.41051	0.027145
O08599	Stxbp1	syntaxin binding protein 1	20910	O08599_S593	TB_02H-MOCK_00H	#NUM!		0	yes	4.45374	0.0364395
O08648	Map3k4	mitogen-activated protein kinase kinase kinase 4	26407	O08648_S1259	TB_02H-MOCK_00H	-0.346473	0.660801	0.906895	no	-0.346473	0.660801
O08648	Map3k4	mitogen-activated protein kinase kinase kinase 4	26407	O08648_T202	TB_02H-MOCK_00H	1.34403	0.0487368	0.314292	no	1.34403	0.0487368
O08715	Akap1	A kinase (PRKA) anchor protein 1	11640	O08715_S101	TB_02H-MOCK_00H	-0.270125	0.720831	0.925441	no	-0.270125	0.720831
O08715	Akap1	A kinase (PRKA) anchor protein 1	11640	O08715_S55	TB_02H-MOCK_00H	-0.462043	0.412053	0.808847	no	-0.462043	0.412053
O08784	Tcof1	treacle ribosome biogenesis factor 1	21453	O08784_S1124	TB_02H-MOCK_00H	0.0259129	0.93499	0.981534	no	0.0259129	0.93499
O08784	Tcof1	treacle ribosome biogenesis factor 1	21453	O08784_S1126	TB_02H-MOCK_00H	0.27634	0.333298	0.758044	no	0.27634	0.333298
O08784	Tcof1	treacle ribosome biogenesis factor 1	21453	O08784_S1191	TB_02H-MOCK_00H	1.60607	0.0139775	0.162891	no	1.60607	0.0139775
O08784	Tcof1	treacle ribosome biogenesis factor 1	21453	O08784_S1216	TB_02H-MOCK_00H	0.716111	0.106328	0.46787	no	0.716111	0.106328
O08784	Tcof1	treacle ribosome biogenesis factor 1	21453	O08784_S1301	TB_02H-MOCK_00H	0.457815	0.459732	0.824138	no	0.457815	0.459732
O08784	Tcof1	treacle ribosome biogenesis factor 1	21453	O08784_S1303	TB_02H-MOCK_00H	0.486614	0.355956	0.775831	no	0.486614	0.355956
O08784	Tcof1	treacle ribosome biogenesis factor 1	21453	O08784_S154	TB_02H-MOCK_00H	-0.319727	0.758649	0.940926	no	-0.319727	0.758649
O08784	Tcof1	treacle ribosome biogenesis factor 1	21453	O08784_S169	TB_02H-MOCK_00H	-0.00844862	0.967849	0.990683	no	-0.00844862	0.967849
O08784	Tcof1	treacle ribosome biogenesis factor 1	21453	O08784_S169;O08784_T171	TB_02H-MOCK_00H	0.553091	0.500483	0.843164	no	0.553091	0.500483
O08784	Tcof1	treacle ribosome biogenesis factor 1	21453	O08784_S592	TB_02H-MOCK_00H	#NUM!		0	yes	6.77688	0.0195094
O08784	Tcof1	treacle ribosome biogenesis factor 1	21453	O08784_S593	TB_02H-MOCK_00H	-0.500682	0.0653587	0.366558	no	-0.500682	0.0653587
O08784	Tcof1	treacle ribosome biogenesis factor 1	21453	O08784_S852	TB_02H-MOCK_00H	0.0526537	0.874311	0.969859	no	0.0526537	0.874311
O08784	Tcof1	treacle ribosome biogenesis factor 1	21453	O08784_S853	TB_02H-MOCK_00H	0.145359	0.815182	0.956755	no	0.145359	0.815182
O08784	Tcof1	treacle ribosome biogenesis factor 1	21453	O08784_T165	TB_02H-MOCK_00H	1.32888	0.0218984	0.205678	no	1.32888	0.0218984
O08784	Tcof1	treacle ribosome biogenesis factor 1	21453	O08784_T165;O08784_S169	TB_02H-MOCK_00H	0.0248292	0.972083	0.992765	no	0.0248292	0.972083
O08843	O08843			O08843_S64	TB_02H-MOCK_00H	-0.431267	0.345359	0.768923	no	-0.431267	0.345359
O08856	Ell	elongation factor RNA polymerase II	13716	O08856_S308	TB_02H-MOCK_00H	-0.241439	0.593882	0.880005	no	-0.241439	0.593882
O08992	Sdcbp	syndecan binding protein	53378	O08992_S6	TB_02H-MOCK_00H	#NUM!		0	yes	5.15301	0.0292202
O09000	O09000			O09000_S1303	TB_02H-MOCK_00H	0.603048	0.226683	0.655376	no	0.603048	0.226683
O09000	O09000			O09000_S215	TB_02H-MOCK_00H	-0.217902	0.474043	0.828419	no	-0.217902	0.474043
O09000	O09000			O09000_S562	TB_02H-MOCK_00H	-0.403945	0.430921	0.81442	no	-0.403945	0.430921
O09000	O09000			O09000_S847	TB_02H-MOCK_00H	0.212784	0.342065	0.765886	no	0.212784	0.342065
O09000	O09000			O09000_S847;O09000_S850	TB_02H-MOCK_00H	-1.62128	0.0112221	0.143767	no	-1.62128	0.0112221
O09000	O09000			O09000_S924	TB_02H-MOCK_00H	-0.197424	0.698114	0.918428	no	-0.197424	0.698114
O09044	Snap23	synaptosomal-associated protein 23	20619	O09044_S110	TB_02H-MOCK_00H	-0.21912	0.743973	0.934886	no	-0.21912	0.743973
O09044	Snap23	synaptosomal-associated protein 23	20619	O09044_S112	TB_02H-MOCK_00H	-0.139568	0.726861	0.928989	no	-0.139568	0.726861
O09044	Snap23	synaptosomal-associated protein 23	20619	O09044_S20;O09044_S23	TB_02H-MOCK_00H	#NUM!		0	yes	-5.38305	0.0281025
O09044	Snap23	synaptosomal-associated protein 23	20619	O09044_S5	TB_02H-MOCK_00H	#NUM!		0	yes	4.96711	0.0493531
O09044	Snap23	synaptosomal-associated protein 23	20619	O09044_T102	TB_02H-MOCK_00H	-0.460146	0.454521	0.823788	no	-0.460146	0.454521
O09047	C3ar1	complement component 3a receptor 1	12267	O09047_S452;O09047_S458	TB_02H-MOCK_00H	-0.125065	0.924234	0.979275	no	-0.125065	0.924234
O09047	C3ar1	complement component 3a receptor 1	12267	O09047_S452;O09047_T456	TB_02H-MOCK_00H	0.828378	0.178511	0.592125	no	0.828378	0.178511
O09047	C3ar1	complement component 3a receptor 1	12267	O09047_S468	TB_02H-MOCK_00H	1.50268	0.0969519	0.444741	no	1.50268	0.0969519
O09047	C3ar1	complement component 3a receptor 1	12267	O09047_T456	TB_02H-MOCK_00H	1.25859	0.000212534	0.0106525	no	1.25859	0.000212534
O09106	Hdac1	histone deacetylase 1	433759	O09106_S393	TB_02H-MOCK_00H	1.16275	0.0483459	0.314007	no	1.16275	0.0483459
O09106	Hdac1	histone deacetylase 1	433759	O09106_S409	TB_02H-MOCK_00H	0.934951	0.271922	0.700066	no	0.934951	0.271922
O09110	Map2k3	mitogen-activated protein kinase kinase 3	26397	O09110_S212	TB_02H-MOCK_00H	-0.0936151	0.873052	0.969429	no	-0.0936151	0.873052
O09126	Sema4d	sema domain, immunoglobulin domain (Ig), transmembrane domain (TM) and short cytoplasmic domain, (semaphorin) 4D	20354	O09126_S856	TB_02H-MOCK_00H	0.362423	0.44426	0.816978	no	0.362423	0.44426
O09130	Nfatc2ip	nuclear factor of activated T cells, cytoplasmic, calcineurin dependent 2 interacting protein	18020	O09130_S79;O09130_S81;O09130_S83	TB_02H-MOCK_00H	-4.52764	2.69577e-05	0.00262829	no	-4.52764	2.69577e-05
O35071	Kif1c	kinesin family member 1C	16562	O35071_S1089	TB_02H-MOCK_00H	0.430389	0.0759516	0.395421	no	0.430389	0.0759516
O35071	Kif1c	kinesin family member 1C	16562	O35071_S674;O35071_S676	TB_02H-MOCK_00H	0.64333	0.591694	0.879817	no	0.64333	0.591694
O35071	Kif1c	kinesin family member 1C	16562	O35071_Y671;O35071_S676	TB_02H-MOCK_00H	-1.64772	0.129503	0.505614	no	-1.64772	0.129503
O35126	Atn1	atrophin 1	13498	O35126_S77;O35126_S79	TB_02H-MOCK_00H	0.271167	0.614938	0.889337	no	0.271167	0.614938
O35250	Exoc7	exocyst complex component 7	53413	O35250_S241	TB_02H-MOCK_00H	-0.0692171	0.855568	0.965047	no	-0.0692171	0.855568
O35250	Exoc7	exocyst complex component 7	53413	O35250_S242	TB_02H-MOCK_00H	-0.451679	0.372312	0.790282	no	-0.451679	0.372312
O35250	Exoc7	exocyst complex component 7	53413	O35250_S242;O35250_S250	TB_02H-MOCK_00H	#NUM!		0	yes	7.2582	0.0156119
O35250	Exoc7	exocyst complex component 7	53413	O35250_S244	TB_02H-MOCK_00H	-0.238677	0.504932	0.844695	no	-0.238677	0.504932
O35250	Exoc7	exocyst complex component 7	53413	O35250_S244;O35250_S250	TB_02H-MOCK_00H	#NUM!		0	yes	5.68138	0.03024
O35250	Exoc7	exocyst complex component 7	53413	O35250_S245	TB_02H-MOCK_00H	0.316113	0.312064	0.739493	no	0.316113	0.312064
O35250	Exoc7	exocyst complex component 7	53413	O35250_S250	TB_02H-MOCK_00H	#NUM!		0	yes	5.30444	0.038207
O35295	Purb	purine rich element binding protein B	19291	O35295_S6	TB_02H-MOCK_00H	0.492593	0.660096	0.906501	no	0.492593	0.660096
O35295	Purb	purine rich element binding protein B	19291	O35295_S6;O35295_S8	TB_02H-MOCK_00H	-0.944455	0.299605	0.727092	no	-0.944455	0.299605
O35295	Purb	purine rich element binding protein B	19291	O35295_S8	TB_02H-MOCK_00H	-0.698749	0.530467	0.856055	no	-0.698749	0.530467
O35344	Kpna3	karyopherin (importin) alpha 3	16648	O35344_S60	TB_02H-MOCK_00H	0.190459	0.400545	0.805493	no	0.190459	0.400545
O35345	Kpna6	karyopherin (importin) alpha 6	16650	O35345_S6	TB_02H-MOCK_00H	0.92133	0.00511175	0.0891884	no	0.92133	0.00511175
O35379	Abcc1	ATP-binding cassette, sub-family C (CFTR/MRP), member 1	17250	O35379_S912;O35379_S914;O35379_S915	TB_02H-MOCK_00H	0.343918	0.832833	0.959836	no	0.343918	0.832833
O35379	Abcc1	ATP-binding cassette, sub-family C (CFTR/MRP), member 1	17250	O35379_S914;O35379_S915;O35379_S916	TB_02H-MOCK_00H	#NUM!		0	yes	-6.14343	0.042917
O35379	Abcc1	ATP-binding cassette, sub-family C (CFTR/MRP), member 1	17250	O35379_S914;O35379_S916	TB_02H-MOCK_00H	-0.318587	0.697381	0.918022	no	-0.318587	0.697381
O35381	Anp32a	acidic (leucine-rich) nuclear phosphoprotein 32 family, member A	11737	O35381_S17	TB_02H-MOCK_00H	0.886833	0.2927	0.71999	no	0.886833	0.2927
O35381	Anp32a	acidic (leucine-rich) nuclear phosphoprotein 32 family, member A	11737	O35381_T15	TB_02H-MOCK_00H	0.13023	0.855178	0.965047	no	0.13023	0.855178
O35492	Clk3	CDC-like kinase 3	102414	O35492_S157	TB_02H-MOCK_00H	0.108818	0.863105	0.966645	no	0.108818	0.863105
O35495	Cdk14	cyclin-dependent kinase 14	18647	O35495_S105	TB_02H-MOCK_00H	0.45812	0.443647	0.816678	no	0.45812	0.443647
O35495	Cdk14	cyclin-dependent kinase 14	18647	O35495_S119;O35495_S120	TB_02H-MOCK_00H	-0.685773	0.556674	0.863481	no	-0.685773	0.556674
O35495	Cdk14	cyclin-dependent kinase 14	18647	O35495_S134	TB_02H-MOCK_00H	-0.399854	0.675344	0.91037	no	-0.399854	0.675344
O35495	Cdk14	cyclin-dependent kinase 14	18647	O35495_S24	TB_02H-MOCK_00H	0.0737569	0.847935	0.963233	no	0.0737569	0.847935
O35495	Cdk14	cyclin-dependent kinase 14	18647	O35495_S78	TB_02H-MOCK_00H	-0.143796	0.721874	0.926071	no	-0.143796	0.721874
O35495	Cdk14	cyclin-dependent kinase 14	18647	O35495_S95	TB_02H-MOCK_00H	0.0718096	0.943306	0.983097	no	0.0718096	0.943306
O35516	Notch2	notch 2	18129	O35516_S2076	TB_02H-MOCK_00H	1.67539	0.0280384	0.236078	no	1.67539	0.0280384
O35551	Rabep1	rabaptin, RAB GTPase binding effector protein 1	54189	O35551_S407	TB_02H-MOCK_00H	0.299848	0.479181	0.829694	no	0.299848	0.479181
O35551	Rabep1	rabaptin, RAB GTPase binding effector protein 1	54189	O35551_S407;O35551_S410	TB_02H-MOCK_00H	1.3614	0.123482	0.496061	no	1.3614	0.123482
O35551	Rabep1	rabaptin, RAB GTPase binding effector protein 1	54189	O35551_S407;O35551_T413	TB_02H-MOCK_00H	-0.422439	0.619041	0.89131	no	-0.422439	0.619041
O35551	Rabep1	rabaptin, RAB GTPase binding effector protein 1	54189	O35551_S410	TB_02H-MOCK_00H	0.0582313	0.853777	0.964984	no	0.0582313	0.853777
O35551	Rabep1	rabaptin, RAB GTPase binding effector protein 1	54189	O35551_T408;O35551_S410	TB_02H-MOCK_00H	-0.268232	0.192964	0.610993	no	-0.268232	0.192964
O35551	Rabep1	rabaptin, RAB GTPase binding effector protein 1	54189	O35551_T408;O35551_S419	TB_02H-MOCK_00H	5.14718	0.000105064	0.00663842	no	5.14718	0.000105064
O35551	Rabep1	rabaptin, RAB GTPase binding effector protein 1	54189	O35551_T413	TB_02H-MOCK_00H	-0.473477	0.353809	0.773598	no	-0.473477	0.353809
O35601	Fyb	FYN binding protein	23880	O35601_S114	TB_02H-MOCK_00H	-0.299369	0.476286	0.828419	no	-0.299369	0.476286
O35601	Fyb	FYN binding protein	23880	O35601_S17	TB_02H-MOCK_00H	0.838502	0.321252	0.747127	no	0.838502	0.321252
O35601	Fyb	FYN binding protein	23880	O35601_S18	TB_02H-MOCK_00H	0.32221	0.35704	0.775831	no	0.32221	0.35704
O35601	Fyb	FYN binding protein	23880	O35601_S203	TB_02H-MOCK_00H	0.162431	0.908888	0.976517	no	0.162431	0.908888
O35601	Fyb	FYN binding protein	23880	O35601_S222	TB_02H-MOCK_00H	0.815298	0.0078587	0.116751	no	0.815298	0.0078587
O35601	Fyb	FYN binding protein	23880	O35601_S27	TB_02H-MOCK_00H	2.3774	0.0396538	0.286105	no	2.3774	0.0396538
O35601	Fyb	FYN binding protein	23880	O35601_S28	TB_02H-MOCK_00H	0.82401	0.0721846	0.384169	no	0.82401	0.0721846
O35601	Fyb	FYN binding protein	23880	O35601_S46	TB_02H-MOCK_00H	0.79021	0.167599	0.578639	no	0.79021	0.167599
O35601	Fyb	FYN binding protein	23880	O35601_S546	TB_02H-MOCK_00H	0.540616	0.545537	0.860369	no	0.540616	0.545537
O35601	Fyb	FYN binding protein	23880	O35601_S561	TB_02H-MOCK_00H	0.0436552	0.917211	0.977117	no	0.0436552	0.917211
O35601	Fyb	FYN binding protein	23880	O35601_S568	TB_02H-MOCK_00H	-0.946955	0.168252	0.578645	no	-0.946955	0.168252
O35601	Fyb	FYN binding protein	23880	O35601_S665	TB_02H-MOCK_00H	2.22982	0.0532938	0.331266	no	2.22982	0.0532938
O35601	Fyb	FYN binding protein	23880	O35601_Y559	TB_02H-MOCK_00H	1.35218	0.0262303	0.227111	no	1.35218	0.0262303
O35601	Fyb	FYN binding protein	23880	O35601_Y559;O35601_S561	TB_02H-MOCK_00H	0.12425	0.79126	0.950973	no	0.12425	0.79126
O35609	Scamp3	secretory carrier membrane protein 3	24045	O35609_S78	TB_02H-MOCK_00H	1.13804	0.000104349	0.00663842	no	1.13804	0.000104349
O35609	Scamp3	secretory carrier membrane protein 3	24045	O35609_S87	TB_02H-MOCK_00H	-1.33576	0.0678353	0.372886	no	-1.33576	0.0678353
O35613	Daxx	Fas death domain-associated protein	13163	O35613_S736;O35613_S738	TB_02H-MOCK_00H	-1.22867	0.199656	0.622002	no	-1.22867	0.199656
O35613	Daxx	Fas death domain-associated protein	13163	O35613_T523	TB_02H-MOCK_00H	0.659077	0.386817	0.798327	no	0.659077	0.386817
O35671	Itgb1bp1	integrin beta 1 binding protein 1	16413	O35671_S11;O35671_S12	TB_02H-MOCK_00H	-0.673123	0.458484	0.823925	no	-0.673123	0.458484
O35671	Itgb1bp1	integrin beta 1 binding protein 1	16413	O35671_S41	TB_02H-MOCK_00H	0.452209	0.0154666	0.171687	no	0.452209	0.0154666
O35691	Pnn	pinin	18949	O35691_S100	TB_02H-MOCK_00H	0.153924	0.745685	0.935051	no	0.153924	0.745685
O35691	Pnn	pinin	18949	O35691_S66	TB_02H-MOCK_00H	-0.793057	0.236559	0.665878	no	-0.793057	0.236559
O35711	Ppfibp2	PTPRF interacting protein, binding protein 2 (liprin beta 2)	19024	O35711_S328	TB_02H-MOCK_00H	#NUM!		0	yes	5.42639	0.0249307
O35711	Ppfibp2	PTPRF interacting protein, binding protein 2 (liprin beta 2)	19024	O35711_S362	TB_02H-MOCK_00H	0.583632	0.0544053	0.33411	no	0.583632	0.0544053
O35711	Ppfibp2	PTPRF interacting protein, binding protein 2 (liprin beta 2)	19024	O35711_S386	TB_02H-MOCK_00H	-0.486371	0.286254	0.716178	no	-0.486371	0.286254
O35711	Ppfibp2	PTPRF interacting protein, binding protein 2 (liprin beta 2)	19024	O35711_S518	TB_02H-MOCK_00H	0.107318	0.758688	0.940926	no	0.107318	0.758688
O35737	Hnrnph1	heterogeneous nuclear ribonucleoprotein H1	59013	O35737_S104	TB_02H-MOCK_00H	0.41823	0.566707	0.866979	no	0.41823	0.566707
O35841	Api5	apoptosis inhibitor 5	11800	O35841_S461	TB_02H-MOCK_00H	0.670906	0.214737	0.63925	no	0.670906	0.214737
O35841	Api5	apoptosis inhibitor 5	11800	O35841_S461;O35841_S469	TB_02H-MOCK_00H	-0.175798	0.799608	0.953003	no	-0.175798	0.799608
O35841	Api5	apoptosis inhibitor 5	11800	O35841_S462	TB_02H-MOCK_00H	1.53828	0.229942	0.659816	no	1.53828	0.229942
O35841	Api5	apoptosis inhibitor 5	11800	O35841_T460;O35841_S462	TB_02H-MOCK_00H	-0.744685	0.43084	0.81442	no	-0.744685	0.43084
O35892	Sp100	nuclear antigen Sp100	20684	O35892_S190	TB_02H-MOCK_00H	0.371474	0.544154	0.860369	no	0.371474	0.544154
O35892	Sp100	nuclear antigen Sp100	20684	O35892_S314	TB_02H-MOCK_00H	0.341135	0.57294	0.869257	no	0.341135	0.57294
O35892	Sp100	nuclear antigen Sp100	20684	O35892_S314;O35892_S318	TB_02H-MOCK_00H	-0.097894	0.922375	0.978746	no	-0.097894	0.922375
O35892	Sp100	nuclear antigen Sp100	20684	O35892_S314;O35892_S319	TB_02H-MOCK_00H	-1.45691	0.0319056	0.253841	no	-1.45691	0.0319056
O35892	Sp100	nuclear antigen Sp100	20684	O35892_S314;O35892_T316	TB_02H-MOCK_00H	#NUM!		0	yes	-6.17089	0.0213889
O35892	Sp100	nuclear antigen Sp100	20684	O35892_S338	TB_02H-MOCK_00H	0.0574957	0.824846	0.959777	no	0.0574957	0.824846
O35892	Sp100	nuclear antigen Sp100	20684	O35892_S4	TB_02H-MOCK_00H	-0.458591	0.615861	0.890276	no	-0.458591	0.615861
O35892	Sp100	nuclear antigen Sp100	20684	O35892_S4;O35892_S7	TB_02H-MOCK_00H	-1.78487	0.00470031	0.0854458	no	-1.78487	0.00470031
O35892	Sp100	nuclear antigen Sp100	20684	O35892_S7	TB_02H-MOCK_00H	-0.164486	0.837407	0.959836	no	-0.164486	0.837407
O35892	Sp100	nuclear antigen Sp100	20684	O35892_T182	TB_02H-MOCK_00H	0.653292	0.418323	0.80935	no	0.653292	0.418323
O35892	Sp100	nuclear antigen Sp100	20684	O35892_T313	TB_02H-MOCK_00H	0.0749671	0.916232	0.977117	no	0.0749671	0.916232
O35892	Sp100	nuclear antigen Sp100	20684	O35892_T313;O35892_S314	TB_02H-MOCK_00H	0.0922994	0.862649	0.966645	no	0.0922994	0.862649
O35892	Sp100	nuclear antigen Sp100	20684	O35892_T313;O35892_S318	TB_02H-MOCK_00H	-1.6338	0.115957	0.48399	no	-1.6338	0.115957
O35892	Sp100	nuclear antigen Sp100	20684	O35892_T313;O35892_S319	TB_02H-MOCK_00H	-0.122886	0.822722	0.959427	no	-0.122886	0.822722
O35892	Sp100	nuclear antigen Sp100	20684	O35892_T313;O35892_T316	TB_02H-MOCK_00H	-0.825726	0.341012	0.76475	no	-0.825726	0.341012
O35892	Sp100	nuclear antigen Sp100	20684	O35892_T316;O35892_S318	TB_02H-MOCK_00H	#NUM!		0	yes	7.1963	0.0224949
O35927	Ctnnd2	catenin (cadherin associated protein), delta 2	18163	O35927_S458	TB_02H-MOCK_00H	0.803034	0.0188311	0.190595	no	0.803034	0.0188311
O35927	Ctnnd2	catenin (cadherin associated protein), delta 2	18163	O35927_S471	TB_02H-MOCK_00H	-0.0454392	0.875823	0.9699	no	-0.0454392	0.875823
O35927	Ctnnd2	catenin (cadherin associated protein), delta 2	18163	O35927_Y1176;O35927_T1178	TB_02H-MOCK_00H	1.17154	0.381286	0.795166	no	1.17154	0.381286
O35954	Pitpnm1	phosphatidylinositol transfer protein, membrane-associated 1	18739	O35954_S664	TB_02H-MOCK_00H	0.0387087	0.969475	0.991568	no	0.0387087	0.969475
O35955	Psmb10	proteasome (prosome, macropain) subunit, beta type 10	19171	O35955_S229	TB_02H-MOCK_00H	0.501205	0.0470208	0.312782	no	0.501205	0.0470208
O35969	Gamt	guanidinoacetate methyltransferase	14431	O35969_S3	TB_02H-MOCK_00H	0.666334	0.17999	0.593946	no	0.666334	0.17999
O54774	Ap3d1	adaptor-related protein complex 3, delta 1 subunit	11776	O54774_S754;O54774_S755;O54774_S760	TB_02H-MOCK_00H	0.493087	0.377449	0.793196	no	0.493087	0.377449
O54774	Ap3d1	adaptor-related protein complex 3, delta 1 subunit	11776	O54774_S754;O54774_S755;O54774_T758	TB_02H-MOCK_00H	-1.70551	0.0717495	0.383056	no	-1.70551	0.0717495
O54774	Ap3d1	adaptor-related protein complex 3, delta 1 subunit	11776	O54774_S754;O54774_S760	TB_02H-MOCK_00H	-0.150307	0.843316	0.961384	no	-0.150307	0.843316
O54774	Ap3d1	adaptor-related protein complex 3, delta 1 subunit	11776	O54774_S755;O54774_S760	TB_02H-MOCK_00H	-0.35713	0.596929	0.881539	no	-0.35713	0.596929
O54774	Ap3d1	adaptor-related protein complex 3, delta 1 subunit	11776	O54774_S755;O54774_T758	TB_02H-MOCK_00H	-0.0828428	0.961634	0.988207	no	-0.0828428	0.961634
O54774	Ap3d1	adaptor-related protein complex 3, delta 1 subunit	11776	O54774_S755;O54774_T758;O54774_S760	TB_02H-MOCK_00H	1.05641	0.137992	0.519406	no	1.05641	0.137992
O54774	Ap3d1	adaptor-related protein complex 3, delta 1 subunit	11776	O54774_S760	TB_02H-MOCK_00H	-0.568893	0.184155	0.601344	no	-0.568893	0.184155
O54774	Ap3d1	adaptor-related protein complex 3, delta 1 subunit	11776	O54774_S784	TB_02H-MOCK_00H	0.832685	0.270971	0.69924	no	0.832685	0.270971
O54774	Ap3d1	adaptor-related protein complex 3, delta 1 subunit	11776	O54774_S825	TB_02H-MOCK_00H	0.702293	0.203886	0.627248	no	0.702293	0.203886
O54774	Ap3d1	adaptor-related protein complex 3, delta 1 subunit	11776	O54774_T382;O54774_T390	TB_02H-MOCK_00H	-0.346145	0.509815	0.845791	no	-0.346145	0.509815
O54774	Ap3d1	adaptor-related protein complex 3, delta 1 subunit	11776	O54774_T758;O54774_S760	TB_02H-MOCK_00H	-0.366908	0.450833	0.821625	no	-0.366908	0.450833
O54781	Srpk2	serine/arginine-rich protein specific kinase 2	20817	O54781_S487	TB_02H-MOCK_00H	0.473589	0.393123	0.803813	no	0.473589	0.393123
O54781	Srpk2	serine/arginine-rich protein specific kinase 2	20817	O54781_S487;O54781_S489	TB_02H-MOCK_00H	-2.79221	0.128165	0.504291	no	-2.79221	0.128165
O54781	Srpk2	serine/arginine-rich protein specific kinase 2	20817	O54781_S487;O54781_S490	TB_02H-MOCK_00H	1.38952	7.2715e-05	0.0051438	no	1.38952	7.2715e-05
O54781	Srpk2	serine/arginine-rich protein specific kinase 2	20817	O54781_S487;O54781_T491	TB_02H-MOCK_00H	0.346179	0.691476	0.916523	no	0.346179	0.691476
O54781	Srpk2	serine/arginine-rich protein specific kinase 2	20817	O54781_S489	TB_02H-MOCK_00H	#NUM!		0	yes	8.18637	0.014635
O54781	Srpk2	serine/arginine-rich protein specific kinase 2	20817	O54781_S9	TB_02H-MOCK_00H	0.815149	0.0686212	0.375283	no	0.815149	0.0686212
O54785	Limk2	LIM motif-containing protein kinase 2	16886	O54785_S287	TB_02H-MOCK_00H	-1.62849	0.045164	0.3081	no	-1.62849	0.045164
O54785	Limk2	LIM motif-containing protein kinase 2	16886	O54785_S289	TB_02H-MOCK_00H	-0.748956	0.0247065	0.220865	no	-0.748956	0.0247065
O54785	Limk2	LIM motif-containing protein kinase 2	16886	O54785_S289;O54785_S291	TB_02H-MOCK_00H	0.2472	0.589834	0.878407	no	0.2472	0.589834
O54785	Limk2	LIM motif-containing protein kinase 2	16886	O54785_S289;O54785_S291;O54785_S297	TB_02H-MOCK_00H	#NUM!		0	yes	5.54435	0.0414504
O54824	Il16	interleukin 16	16170	O54824_S838	TB_02H-MOCK_00H	0.682041	0.631691	0.897678	no	0.682041	0.631691
O54824	Il16	interleukin 16	16170	O54824_S839	TB_02H-MOCK_00H	0.500665	0.167846	0.578645	no	0.500665	0.167846
O54824	Il16	interleukin 16	16170	O54824_S930	TB_02H-MOCK_00H	1.43905	3.87792e-09	5.04751e-06	no	1.43905	3.87792e-09
O54824	Il16	interleukin 16	16170	O54824_S959	TB_02H-MOCK_00H	0.301185	0.455421	0.823788	no	0.301185	0.455421
O54824	Il16	interleukin 16	16170	O54824_S967	TB_02H-MOCK_00H	0.0760436	0.803022	0.953759	no	0.0760436	0.803022
O54825	Bysl	bystin-like	53414	O54825_S97	TB_02H-MOCK_00H	0.110658	0.712085	0.922887	no	0.110658	0.712085
O54834	Arhgap6	Rho GTPase activating protein 6	11856	O54834_S338;O54834_T339	TB_02H-MOCK_00H	0.224401	0.673839	0.91037	no	0.224401	0.673839
O54834	Arhgap6	Rho GTPase activating protein 6	11856	O54834_S365	TB_02H-MOCK_00H	0.154331	0.669123	0.910071	no	0.154331	0.669123
O54834	Arhgap6	Rho GTPase activating protein 6	11856	O54834_S669;O54834_S675	TB_02H-MOCK_00H	#NUM!		0	yes	4.92384	0.0243832
O54834	Arhgap6	Rho GTPase activating protein 6	11856	O54834_S790	TB_02H-MOCK_00H	#NUM!		0	yes	8.13759	0.0274596
O54834	Arhgap6	Rho GTPase activating protein 6	11856	O54834_S824	TB_02H-MOCK_00H	0.34807	0.321476	0.747127	no	0.34807	0.321476
O54916	Reps1	RalBP1 associated Eps domain containing protein	19707	O54916_S272	TB_02H-MOCK_00H	#NUM!		0	yes	-5.50278	0.0490828
O54916	Reps1	RalBP1 associated Eps domain containing protein	19707	O54916_S272;O54916_S273	TB_02H-MOCK_00H	0.0738581	0.974514	0.99284	no	0.0738581	0.974514
O54916	Reps1	RalBP1 associated Eps domain containing protein	19707	O54916_S272;O54916_S274	TB_02H-MOCK_00H	#NUM!		0	yes	-5.96891	0.0423311
O54916	Reps1	RalBP1 associated Eps domain containing protein	19707	O54916_S536;O54916_S555	TB_02H-MOCK_00H	0.360952	0.700297	0.919043	no	0.360952	0.700297
O54916	Reps1	RalBP1 associated Eps domain containing protein	19707	O54916_S560	TB_02H-MOCK_00H	0.210603	0.657552	0.905348	no	0.210603	0.657552
O54916	Reps1	RalBP1 associated Eps domain containing protein	19707	O54916_S561	TB_02H-MOCK_00H	0.819154	0.185979	0.604026	no	0.819154	0.185979
O54916	Reps1	RalBP1 associated Eps domain containing protein	19707	O54916_S708	TB_02H-MOCK_00H	2.3053	0.0752843	0.393218	no	2.3053	0.0752843
O54918	Bcl2l11	BCL2-like 11 (apoptosis facilitator)	12125	O54918_S82	TB_02H-MOCK_00H	-1.40041	0.193527	0.611393	no	-1.40041	0.193527
O54918	Bcl2l11	BCL2-like 11 (apoptosis facilitator)	12125	O54918_S83	TB_02H-MOCK_00H	-0.0796126	0.879741	0.9699	no	-0.0796126	0.879741
O54928	Socs5	suppressor of cytokine signaling 5	56468	O54928_S44	TB_02H-MOCK_00H	0.0311723	0.95452	0.985636	no	0.0311723	0.95452
O54928	Socs5	suppressor of cytokine signaling 5	56468	O54928_S44;O54928_S46	TB_02H-MOCK_00H	1.26165	0.060129	0.350959	no	1.26165	0.060129
O54940	Bnip2	BCL2/adenovirus E1B interacting protein 2	12175	O54940_S114	TB_02H-MOCK_00H	-0.470786	0.351316	0.771679	no	-0.470786	0.351316
O54965	Rnf13	ring finger protein 13	24017	O54965_S288;O54965_S294;O54965_S298	TB_02H-MOCK_00H	-0.295997	0.647081	0.902038	no	-0.295997	0.647081
O54988	Slk	STE20-like kinase	20874	O54988_S643;O54988_S645	TB_02H-MOCK_00H	1.21049	0.141895	0.527702	no	1.21049	0.141895
O54988	Slk	STE20-like kinase	20874	O54988_S775	TB_02H-MOCK_00H	0.0818884	0.871482	0.968794	no	0.0818884	0.871482
O54988	Slk	STE20-like kinase	20874	O54988_S777	TB_02H-MOCK_00H	-0.908727	0.00589179	0.0965595	no	-0.908727	0.00589179
O55022	Pgrmc1	progesterone receptor membrane component 1	53328	O55022_S181	TB_02H-MOCK_00H	-0.00234052	0.996963	0.999474	no	-0.00234052	0.996963
O55022	Pgrmc1	progesterone receptor membrane component 1	53328	O55022_T178	TB_02H-MOCK_00H	0.311038	0.67441	0.91037	no	0.311038	0.67441
O55022	Pgrmc1	progesterone receptor membrane component 1	53328	O55022_Y180	TB_02H-MOCK_00H	#NUM!		0	yes	7.85786	0.0394454
O55028	Bckdk	branched chain ketoacid dehydrogenase kinase	12041	O55028_S31	TB_02H-MOCK_00H	-0.209458	0.805215	0.953773	no	-0.209458	0.805215
O55028	Bckdk	branched chain ketoacid dehydrogenase kinase	12041	O55028_S33	TB_02H-MOCK_00H	0.432653	0.461943	0.825445	no	0.432653	0.461943
O55033	Nck2	non-catalytic region of tyrosine kinase adaptor protein 2	17974	O55033_S90;O55033_T92	TB_02H-MOCK_00H	-0.322699	0.482709	0.831297	no	-0.322699	0.482709
O55098	Stk10	serine/threonine kinase 10	20868	O55098_S13	TB_02H-MOCK_00H	0.0409975	0.923272	0.979087	no	0.0409975	0.923272
O55098	Stk10	serine/threonine kinase 10	20868	O55098_S412	TB_02H-MOCK_00H	0.43291	0.366981	0.785025	no	0.43291	0.366981
O55098	Stk10	serine/threonine kinase 10	20868	O55098_S416	TB_02H-MOCK_00H	0.536863	0.0571012	0.342186	no	0.536863	0.0571012
O55098	Stk10	serine/threonine kinase 10	20868	O55098_S437	TB_02H-MOCK_00H	-0.177533	0.664567	0.908784	no	-0.177533	0.664567
O55098	Stk10	serine/threonine kinase 10	20868	O55098_S449;O55098_S453	TB_02H-MOCK_00H	-0.420071	0.39571	0.805175	no	-0.420071	0.39571
O55098	Stk10	serine/threonine kinase 10	20868	O55098_S449;O55098_S454	TB_02H-MOCK_00H	-0.445595	0.296897	0.724216	no	-0.445595	0.296897
O55098	Stk10	serine/threonine kinase 10	20868	O55098_S454	TB_02H-MOCK_00H	0.179924	0.717364	0.92434	no	0.179924	0.717364
O55098	Stk10	serine/threonine kinase 10	20868	O55098_T950	TB_02H-MOCK_00H	1.62689	0.000739731	0.0256073	no	1.62689	0.000739731
O55106	Strn	striatin, calmodulin binding protein	268980	O55106_S239	TB_02H-MOCK_00H	-0.608326	0.516238	0.848617	no	-0.608326	0.516238
O55106	Strn	striatin, calmodulin binding protein	268980	O55106_S245	TB_02H-MOCK_00H	0.654074	0.252058	0.68418	no	0.654074	0.252058
O55131	Sept7	septin 7	235072	O55131_S422	TB_02H-MOCK_00H	-0.118748	0.806088	0.953773	no	-0.118748	0.806088
O55131	Sept7	septin 7	235072	O55131_S423	TB_02H-MOCK_00H	-0.0234467	0.975272	0.99312	no	-0.0234467	0.975272
O55131	Sept7	septin 7	235072	O55131_T425	TB_02H-MOCK_00H	-0.461239	0.501177	0.843517	no	-0.461239	0.501177
O55143	Atp2a2	ATPase, Ca++ transporting, cardiac muscle, slow twitch 2	11938	O55143_S663	TB_02H-MOCK_00H	-0.146078	0.781012	0.948177	no	-0.146078	0.781012
O55201	Supt5	suppressor of Ty 5	20924	O55201_S664	TB_02H-MOCK_00H	0.0863664	0.670547	0.910071	no	0.0863664	0.670547
O55201	Supt5	suppressor of Ty 5	20924	O55201_T656	TB_02H-MOCK_00H	#NUM!		0	yes	6.15689	0.0149957
O55222	Ilk	integrin linked kinase	16202	O55222_T181	TB_02H-MOCK_00H	0.198008	0.833392	0.959836	no	0.198008	0.833392
O70131	Ninj1	ninjurin 1	18081	O70131_S18;O70131_S21	TB_02H-MOCK_00H	2.27537	0.00938589	0.129868	no	2.27537	0.00938589
O70131	Ninj1	ninjurin 1	18081	O70131_S3	TB_02H-MOCK_00H	#NUM!		0	yes	-9.70794	0.0362738
O70131	Ninj1	ninjurin 1	18081	O70131_T5;O70131_Y8	TB_02H-MOCK_00H	#NUM!		0	yes	5.99501	0.0300752
O70131	Ninj1	ninjurin 1	18081	O70131_Y8	TB_02H-MOCK_00H	-0.0453996	0.94367	0.983097	no	-0.0453996	0.94367
O70131	Ninj1	ninjurin 1	18081	O70131_Y8;O70131_S18	TB_02H-MOCK_00H	1.92646	0.00311813	0.0674179	no	1.92646	0.00311813
O70145	Ncf2	neutrophil cytosolic factor 2	17970	O70145_S224	TB_02H-MOCK_00H	0.309425	0.782047	0.948216	no	0.309425	0.782047
O70145	Ncf2	neutrophil cytosolic factor 2	17970	O70145_S312	TB_02H-MOCK_00H	#NUM!		0	yes	5.48656	0.0336259
O70145	Ncf2	neutrophil cytosolic factor 2	17970	O70145_S312;O70145_S324	TB_02H-MOCK_00H	1.17096	0.164369	0.573179	no	1.17096	0.164369
O70145	Ncf2	neutrophil cytosolic factor 2	17970	O70145_S315;O70145_S323	TB_02H-MOCK_00H	#NUM!		0	yes	5.86546	0.0159143
O70145	Ncf2	neutrophil cytosolic factor 2	17970	O70145_S323	TB_02H-MOCK_00H	-0.089374	0.939795	0.981573	no	-0.089374	0.939795
O70145	Ncf2	neutrophil cytosolic factor 2	17970	O70145_S324	TB_02H-MOCK_00H	0.432142	0.342225	0.765886	no	0.432142	0.342225
O70145	Ncf2	neutrophil cytosolic factor 2	17970	O70145_S332	TB_02H-MOCK_00H	0.972763	0.120946	0.494105	no	0.972763	0.120946
O70145	Ncf2	neutrophil cytosolic factor 2	17970	O70145_T233	TB_02H-MOCK_00H	-1.09025	0.410626	0.808847	no	-1.09025	0.410626
O70145	Ncf2	neutrophil cytosolic factor 2	17970	O70145_T311	TB_02H-MOCK_00H	#NUM!		0	yes	7.11794	0.0150832
O70145	Ncf2	neutrophil cytosolic factor 2	17970	O70145_T311;O70145_S323	TB_02H-MOCK_00H	#NUM!		0	yes	8.04506	0.0270605
O70146	Tesk1	testis specific protein kinase 1	21754	O70146_S439;O70146_S442	TB_02H-MOCK_00H	-0.180775	0.606546	0.885117	no	-0.180775	0.606546
O70161	Pip5k1c	phosphatidylinositol-4-phosphate 5-kinase, type 1 gamma	18717	O70161_S554	TB_02H-MOCK_00H	0.565825	0.416457	0.80935	no	0.565825	0.416457
O70172	Pip4k2a	phosphatidylinositol-5-phosphate 4-kinase, type II, alpha	18718	O70172_S9	TB_02H-MOCK_00H	-0.136982	0.772856	0.94473	no	-0.136982	0.772856
O70279	Ess2	ess-2 splicing factor	27886	O70279_S394;O70279_S398	TB_02H-MOCK_00H	-0.314775	0.399934	0.805493	no	-0.314775	0.399934
O70279	Ess2	ess-2 splicing factor	27886	O70279_T3	TB_02H-MOCK_00H	0.20702	0.546078	0.860369	no	0.20702	0.546078
O70305	Atxn2	ataxin 2	20239	O70305_S653	TB_02H-MOCK_00H	-0.805485	0.0462158	0.310779	no	-0.805485	0.0462158
O70305	Atxn2	ataxin 2	20239	O70305_T699	TB_02H-MOCK_00H	1.54988	0.0242345	0.218136	no	1.54988	0.0242345
O70305	Atxn2	ataxin 2	20239	O70305_T710	TB_02H-MOCK_00H	-0.209586	0.441118	0.816495	no	-0.209586	0.441118
O70310	Nmt1	N-myristoyltransferase 1	18107	O70310_S47	TB_02H-MOCK_00H	0.995079	0.10273	0.459811	no	0.995079	0.10273
O70318	Epb41l2	erythrocyte membrane protein band 4.1 like 2	13822	O70318_S201	TB_02H-MOCK_00H	-0.317368	0.393807	0.80392	no	-0.317368	0.393807
O70318	Epb41l2	erythrocyte membrane protein band 4.1 like 2	13822	O70318_S38	TB_02H-MOCK_00H	-0.0484914	0.917167	0.977117	no	-0.0484914	0.917167
O70318	Epb41l2	erythrocyte membrane protein band 4.1 like 2	13822	O70318_S492	TB_02H-MOCK_00H	0.635076	0.301238	0.727092	no	0.635076	0.301238
O70318	Epb41l2	erythrocyte membrane protein band 4.1 like 2	13822	O70318_S582	TB_02H-MOCK_00H	2.28502	2.34877e-07	9.55362e-05	no	2.28502	2.34877e-07
O70318	Epb41l2	erythrocyte membrane protein band 4.1 like 2	13822	O70318_S698	TB_02H-MOCK_00H	0.463979	0.424834	0.810891	no	0.463979	0.424834
O70318	Epb41l2	erythrocyte membrane protein band 4.1 like 2	13822	O70318_S86	TB_02H-MOCK_00H	1.18234	0.111197	0.475678	no	1.18234	0.111197
O70318	Epb41l2	erythrocyte membrane protein band 4.1 like 2	13822	O70318_T35	TB_02H-MOCK_00H	1.17011	0.199964	0.622114	no	1.17011	0.199964
O70318	Epb41l2	erythrocyte membrane protein band 4.1 like 2	13822	O70318_T858;O70318_T870;O70318_S873	TB_02H-MOCK_00H	-2.26929	0.0499039	0.317945	no	-2.26929	0.0499039
O70404	Vamp8	vesicle-associated membrane protein 8	22320	O70404_S5	TB_02H-MOCK_00H	-0.194053	0.70455	0.92054	no	-0.194053	0.70455
O70404	Vamp8	vesicle-associated membrane protein 8	22320	O70404_T54	TB_02H-MOCK_00H	#NUM!		0	yes	-5.07179	0.0299368
O70405	Ulk1	unc-51 like kinase 1	22241	O70405_S450	TB_02H-MOCK_00H	1.56245	0.000747031	0.0256137	no	1.56245	0.000747031
O70405	Ulk1	unc-51 like kinase 1	22241	O70405_S622	TB_02H-MOCK_00H	-0.518394	0.0814248	0.408359	no	-0.518394	0.0814248
O70405	Ulk1	unc-51 like kinase 1	22241	O70405_T624	TB_02H-MOCK_00H	#NUM!		0	yes	-5.76264	0.0438675
O70435	Psma3	proteasome (prosome, macropain) subunit, alpha type 3	19167	O70435_S243	TB_02H-MOCK_00H	-1.00156	0.15315	0.550504	no	-1.00156	0.15315
O70435	Psma3	proteasome (prosome, macropain) subunit, alpha type 3	19167	O70435_S250	TB_02H-MOCK_00H	-0.186685	0.788522	0.949612	no	-0.186685	0.788522
O70439	O70439			O70439_S125	TB_02H-MOCK_00H	-0.0343775	0.957464	0.98735	no	-0.0343775	0.957464
O70439	O70439			O70439_S125;O70439_S129	TB_02H-MOCK_00H	#NUM!		0	yes	10.3581	0.0324254
O70439	O70439			O70439_S125;O70439_S136	TB_02H-MOCK_00H	#NUM!		0	yes	-7.99647	0.0388436
O70439	O70439			O70439_S126	TB_02H-MOCK_00H	0.220173	0.578204	0.871353	no	0.220173	0.578204
O70439	O70439			O70439_S126;O70439_S129	TB_02H-MOCK_00H	0.838618	0.264597	0.695795	no	0.838618	0.264597
O70439	O70439			O70439_S126;O70439_S136	TB_02H-MOCK_00H	#NUM!		0	yes	-7.0878	0.0432982
O70439	O70439			O70439_S129	TB_02H-MOCK_00H	0.0527179	0.881918	0.970182	no	0.0527179	0.881918
O70439	O70439			O70439_S147	TB_02H-MOCK_00H	-0.161611	0.704033	0.92054	no	-0.161611	0.704033
O70439	O70439			O70439_S2	TB_02H-MOCK_00H	0.647255	0.282656	0.711028	no	0.647255	0.282656
O70439	O70439			O70439_S45	TB_02H-MOCK_00H	-0.178113	0.553463	0.862946	no	-0.178113	0.553463
O70439	O70439			O70439_Y3;O70439_T4	TB_02H-MOCK_00H	-0.848806	0.252355	0.684215	no	-0.848806	0.252355
O70469	Dok2	docking protein 2	13449	O70469_S124	TB_02H-MOCK_00H	-0.46345	0.381311	0.795166	no	-0.46345	0.381311
O70480	Vamp4	vesicle-associated membrane protein 4	53330	O70480_S30	TB_02H-MOCK_00H	0.362206	0.531269	0.856605	no	0.362206	0.531269
O70492	O70492			O70492_T13	TB_02H-MOCK_00H	0.0702772	0.908915	0.976517	no	0.0702772	0.908915
O70493	Snx12	sorting nexin 12	55988	O70493_S2	TB_02H-MOCK_00H	0.269434	0.450495	0.821238	no	0.269434	0.450495
O70493	Snx12	sorting nexin 12	55988	O70493_T4	TB_02H-MOCK_00H	0.439446	0.200735	0.622383	no	0.439446	0.200735
O70551	Srpk1	serine/arginine-rich protein specific kinase 1	20815	O70551_T438;O70551_S450	TB_02H-MOCK_00H	2.9076	0.100032	0.451464	no	2.9076	0.100032
O70585	Dtnb	dystrobrevin, beta	13528	O70585_T522;O70585_T527	TB_02H-MOCK_00H	0.0074327	0.993892	0.997571	no	0.0074327	0.993892
O88286	Wiz	widely-interspaced zinc finger motifs	22404	O88286_S1014	TB_02H-MOCK_00H	#NUM!		0	yes	-5.13071	0.0217158
O88286	Wiz	widely-interspaced zinc finger motifs	22404	O88286_S1043	TB_02H-MOCK_00H	-0.250785	0.374042	0.791352	no	-0.250785	0.374042
O88286	Wiz	widely-interspaced zinc finger motifs	22404	O88286_S1045;O88286_S1050	TB_02H-MOCK_00H	0.292634	0.508244	0.845606	no	0.292634	0.508244
O88286	Wiz	widely-interspaced zinc finger motifs	22404	O88286_S1179	TB_02H-MOCK_00H	-0.760957	0.0199866	0.196189	no	-0.760957	0.0199866
O88351	Ikbkb	inhibitor of kappaB kinase beta	16150	O88351_S670	TB_02H-MOCK_00H	-0.0128386	0.977967	0.993715	no	-0.0128386	0.977967
O88351	Ikbkb	inhibitor of kappaB kinase beta	16150	O88351_S672	TB_02H-MOCK_00H	0.773195	0.359711	0.778767	no	0.773195	0.359711
O88351	Ikbkb	inhibitor of kappaB kinase beta	16150	O88351_S675	TB_02H-MOCK_00H	0.305853	0.440767	0.816309	no	0.305853	0.440767
O88447	O88447			O88447_S523	TB_02H-MOCK_00H	-0.769254	0.26905	0.697045	no	-0.769254	0.26905
O88448	O88448			O88448_S539	TB_02H-MOCK_00H	0.0166118	0.968384	0.990919	no	0.0166118	0.968384
O88448	O88448			O88448_S575	TB_02H-MOCK_00H	-0.191207	0.277447	0.705323	no	-0.191207	0.277447
O88466	O88466			O88466_S1040;O88466_S1041	TB_02H-MOCK_00H	#NUM!		0	yes	-5.83118	0.020441
O88466	O88466			O88466_S1381	TB_02H-MOCK_00H	#NUM!		0	yes	-5.41101	0.0413917
O88487	Dync1i2	dynein cytoplasmic 1 intermediate chain 2	13427	O88487_S81	TB_02H-MOCK_00H	2.22862	1.11842e-05	0.00145529	no	2.22862	1.11842e-05
O88487	Dync1i2	dynein cytoplasmic 1 intermediate chain 2	13427	O88487_S88	TB_02H-MOCK_00H	0.080564	0.829485	0.959836	no	0.080564	0.829485
O88487	Dync1i2	dynein cytoplasmic 1 intermediate chain 2	13427	O88487_S91	TB_02H-MOCK_00H	1.01572	0.122654	0.494565	no	1.01572	0.122654
O88487	Dync1i2	dynein cytoplasmic 1 intermediate chain 2	13427	O88487_S95	TB_02H-MOCK_00H	#NUM!		0	yes	5.88056	0.0344348
O88487	Dync1i2	dynein cytoplasmic 1 intermediate chain 2	13427	O88487_S98	TB_02H-MOCK_00H	-0.240012	0.599867	0.882919	no	-0.240012	0.599867
O88502	Pde8a	phosphodiesterase 8A	18584	O88502_S16	TB_02H-MOCK_00H	0.0708039	0.910832	0.976517	no	0.0708039	0.910832
O88502	Pde8a	phosphodiesterase 8A	18584	O88502_S18	TB_02H-MOCK_00H	-0.177082	0.907664	0.976045	no	-0.177082	0.907664
O88502	Pde8a	phosphodiesterase 8A	18584	O88502_S452	TB_02H-MOCK_00H	-0.992833	0.0428507	0.299417	no	-0.992833	0.0428507
O88508	Dnmt3a	DNA methyltransferase 3A	13435	O88508_S102	TB_02H-MOCK_00H	0.526405	0.266832	0.695795	no	0.526405	0.266832
O88532	Zfr	zinc finger RNA binding protein	22763	O88532_S1054	TB_02H-MOCK_00H	-0.244127	0.733368	0.930928	no	-0.244127	0.733368
O88569	Hnrnpa2b1	heterogeneous nuclear ribonucleoprotein A2/B1	53379	O88569_S259	TB_02H-MOCK_00H	-0.860815	0.57473	0.869901	no	-0.860815	0.57473
O88569	Hnrnpa2b1	heterogeneous nuclear ribonucleoprotein A2/B1	53379	O88569_S344	TB_02H-MOCK_00H	-0.224729	0.69887	0.918652	no	-0.224729	0.69887
O88569	Hnrnpa2b1	heterogeneous nuclear ribonucleoprotein A2/B1	53379	O88569_Y247	TB_02H-MOCK_00H	#NUM!		0	yes	-6.44209	0.0363124
O88587	Comt	catechol-O-methyltransferase	12846	O88587_S260	TB_02H-MOCK_00H	-0.177256	0.67248	0.910254	no	-0.177256	0.67248
O88587	Comt	catechol-O-methyltransferase	12846	O88587_S261	TB_02H-MOCK_00H	0.717709	0.00775121	0.115435	no	0.717709	0.00775121
O88627	Slc28a2	solute carrier family 28 (sodium-coupled nucleoside transporter), member 2	269346	O88627_S11	TB_02H-MOCK_00H	0.118635	0.856977	0.965522	no	0.118635	0.856977
O88627	Slc28a2	solute carrier family 28 (sodium-coupled nucleoside transporter), member 2	269346	O88627_S9	TB_02H-MOCK_00H	-1.02797	0.107965	0.4704	no	-1.02797	0.107965
O88627	Slc28a2	solute carrier family 28 (sodium-coupled nucleoside transporter), member 2	269346	O88627_T14	TB_02H-MOCK_00H	0.104435	0.8811	0.970045	no	0.104435	0.8811
O88643	O88643			O88643_T212;O88643_T214	TB_02H-MOCK_00H	1.79343	0.000989808	0.0311666	no	1.79343	0.000989808
O88685	Psmc3	proteasome (prosome, macropain) 26S subunit, ATPase 3	19182	O88685_S12	TB_02H-MOCK_00H	1.18838	6.68312e-06	0.00103557	no	1.18838	6.68312e-06
O88685	Psmc3	proteasome (prosome, macropain) 26S subunit, ATPase 3	19182	O88685_T15	TB_02H-MOCK_00H	1.07549	0.0352209	0.26489	no	1.07549	0.0352209
O88685	Psmc3	proteasome (prosome, macropain) 26S subunit, ATPase 3	19182	O88685_T9	TB_02H-MOCK_00H	0.423397	0.301214	0.727092	no	0.423397	0.301214
O88737	Bsn	bassoon	12217	O88737_S2860	TB_02H-MOCK_00H	-0.863494	0.0139186	0.162865	no	-0.863494	0.0139186
O88737	Bsn	bassoon	12217	O88737_S2860;O88737_S2866	TB_02H-MOCK_00H	1.07728	0.00255914	0.0587891	no	1.07728	0.00255914
O88737	Bsn	bassoon	12217	O88737_T2595	TB_02H-MOCK_00H	-0.357057	0.301256	0.727092	no	-0.357057	0.301256
O88738	Birc6	baculoviral IAP repeat-containing 6	12211	O88738_S4047	TB_02H-MOCK_00H	0.0970509	0.713255	0.922887	no	0.0970509	0.713255
O88738	Birc6	baculoviral IAP repeat-containing 6	12211	O88738_T3880;O88738_T3888	TB_02H-MOCK_00H	-0.614115	0.725174	0.928556	no	-0.614115	0.725174
O88746	Tom1	target of myb1 trafficking protein	21968	O88746_S172;O88746_S176	TB_02H-MOCK_00H	0.500638	0.0227561	0.209697	no	0.500638	0.0227561
O88746	Tom1	target of myb1 trafficking protein	21968	O88746_S176;O88746_S180	TB_02H-MOCK_00H	0.502386	0.6658	0.908966	no	0.502386	0.6658
O88746	Tom1	target of myb1 trafficking protein	21968	O88746_S182	TB_02H-MOCK_00H	1.84998	0.000673831	0.0240304	no	1.84998	0.000673831
O88746	Tom1	target of myb1 trafficking protein	21968	O88746_S405	TB_02H-MOCK_00H	2.13113	0.556384	0.863481	no	2.13113	0.556384
O88746	Tom1	target of myb1 trafficking protein	21968	O88746_S462	TB_02H-MOCK_00H	#NUM!		0	yes	-8.06428	0.0166992
O88746	Tom1	target of myb1 trafficking protein	21968	O88746_S462;O88746_S464	TB_02H-MOCK_00H	#NUM!		0	yes	-9.60695	0.0244978
O88746	Tom1	target of myb1 trafficking protein	21968	O88746_S462;O88746_S472	TB_02H-MOCK_00H	#NUM!		0	yes	11.6343	0.0224258
O88746	Tom1	target of myb1 trafficking protein	21968	O88746_S472	TB_02H-MOCK_00H	0.770039	0.0374673	0.277088	no	0.770039	0.0374673
O88842	O88842			O88842_T545	TB_02H-MOCK_00H	-0.250854	0.0836892	0.413091	no	-0.250854	0.0836892
O88845	Akap10	A kinase (PRKA) anchor protein 10	56697	O88845_S257	TB_02H-MOCK_00H	0.105496	0.796197	0.951984	no	0.105496	0.796197
O88845	Akap10	A kinase (PRKA) anchor protein 10	56697	O88845_S280	TB_02H-MOCK_00H	0.284881	0.333479	0.758044	no	0.284881	0.333479
O88845	Akap10	A kinase (PRKA) anchor protein 10	56697	O88845_S280;O88845_S281	TB_02H-MOCK_00H	0.989424	0.0139391	0.162865	no	0.989424	0.0139391
O88852	Tspyl1	testis-specific protein, Y-encoded-like 1	22110	O88852_S2	TB_02H-MOCK_00H	0.532374	0.0772255	0.399828	no	0.532374	0.0772255
O88852	Tspyl1	testis-specific protein, Y-encoded-like 1	22110	O88852_S3	TB_02H-MOCK_00H	-0.0451943	0.856801	0.965522	no	-0.0451943	0.856801
O88852	Tspyl1	testis-specific protein, Y-encoded-like 1	22110	O88852_S3;O88852_S15	TB_02H-MOCK_00H	0.459293	0.468316	0.828207	no	0.459293	0.468316
O88874	O88874			O88874_S325;O88874_S329	TB_02H-MOCK_00H	-0.0499595	0.938137	0.981534	no	-0.0499595	0.938137
O88878	Zfand5	zinc finger, AN1-type domain 5	22682	O88878_S44	TB_02H-MOCK_00H	-1.18636	0.397024	0.805493	no	-1.18636	0.397024
O88907	Pias1	protein inhibitor of activated STAT 1	56469	O88907_S506	TB_02H-MOCK_00H	-0.155689	0.613744	0.889208	no	-0.155689	0.613744
O88935	Syn1	synapsin I	20964	O88935_S427	TB_02H-MOCK_00H	0.0327599	0.961938	0.988207	no	0.0327599	0.961938
O88939	Zbtb7a	zinc finger and BTB domain containing 7a	16969	O88939_S331	TB_02H-MOCK_00H	0.405133	0.632788	0.897736	no	0.405133	0.632788
O88939	Zbtb7a	zinc finger and BTB domain containing 7a	16969	O88939_S331;O88939_Y345	TB_02H-MOCK_00H	0.0907313	0.919531	0.978234	no	0.0907313	0.919531
O88939	Zbtb7a	zinc finger and BTB domain containing 7a	16969	O88939_S335	TB_02H-MOCK_00H	#NUM!		0	yes	-7.78638	0.0152102
O88939	Zbtb7a	zinc finger and BTB domain containing 7a	16969	O88939_Y346;O88939_Y349	TB_02H-MOCK_00H	0.321919	0.158005	0.560642	no	0.321919	0.158005
O88942	O88942			O88942_S235	TB_02H-MOCK_00H	#NUM!		0	yes	4.47267	0.0237486
O88942	O88942			O88942_S235;O88942_S239	TB_02H-MOCK_00H	#NUM!		0	yes	5.44763	0.0375103
O88942	O88942			O88942_S235;O88942_S239;O88942_S241	TB_02H-MOCK_00H	-1.11234	0.233793	0.663072	no	-1.11234	0.233793
O88942	O88942			O88942_S241;O88942_T242	TB_02H-MOCK_00H	#NUM!		0	yes	6.20718	0.0167168
O89001	Cpd	carboxypeptidase D	12874	O89001_T1365;O89001_T1367	TB_02H-MOCK_00H	-0.425677	0.765968	0.942946	no	-0.425677	0.765968
O89001	Cpd	carboxypeptidase D	12874	O89001_T1367;O89001_T1371	TB_02H-MOCK_00H	#NUM!		0	yes	5.2749	0.035767
O89032	Sh3pxd2a	SH3 and PX domains 2A	14218	O89032_S1008	TB_02H-MOCK_00H	-0.731349	0.12385	0.496416	no	-0.731349	0.12385
O89032	Sh3pxd2a	SH3 and PX domains 2A	14218	O89032_S1029	TB_02H-MOCK_00H	0.34158	0.676573	0.91037	no	0.34158	0.676573
O89032	Sh3pxd2a	SH3 and PX domains 2A	14218	O89032_S1029;O89032_S1034	TB_02H-MOCK_00H	#NUM!		0	yes	5.07577	0.017682
O89032	Sh3pxd2a	SH3 and PX domains 2A	14218	O89032_S1034	TB_02H-MOCK_00H	0.892621	0.000192407	0.0100175	no	0.892621	0.000192407
O89032	Sh3pxd2a	SH3 and PX domains 2A	14218	O89032_S420	TB_02H-MOCK_00H	0.575478	0.0449283	0.307459	no	0.575478	0.0449283
O89032	Sh3pxd2a	SH3 and PX domains 2A	14218	O89032_S592	TB_02H-MOCK_00H	0.0926933	0.779437	0.948065	no	0.0926933	0.779437
O89032	Sh3pxd2a	SH3 and PX domains 2A	14218	O89032_S721	TB_02H-MOCK_00H	-0.113019	0.68072	0.912395	no	-0.113019	0.68072
O89032	Sh3pxd2a	SH3 and PX domains 2A	14218	O89032_S812	TB_02H-MOCK_00H	0.445876	0.250807	0.682952	no	0.445876	0.250807
O89032	Sh3pxd2a	SH3 and PX domains 2A	14218	O89032_S993	TB_02H-MOCK_00H	-0.270689	0.342721	0.766208	no	-0.270689	0.342721
O89053	Coro1a	coronin, actin binding protein 1A	12721	O89053_S422	TB_02H-MOCK_00H	0.306006	0.710589	0.922887	no	0.306006	0.710589
O89053	Coro1a	coronin, actin binding protein 1A	12721	O89053_T418	TB_02H-MOCK_00H	0.00961381	0.98499	0.995976	no	0.00961381	0.98499
O89086	Rbm3	RNA binding motif (RNP1, RRM) protein 3	19652	O89086_S133	TB_02H-MOCK_00H	0.295762	0.790045	0.950446	no	0.295762	0.790045
O89090	Sp1	trans-acting transcription factor 1	20683	O89090_S2	TB_02H-MOCK_00H	-0.459604	0.433075	0.815184	no	-0.459604	0.433075
O89090	Sp1	trans-acting transcription factor 1	20683	O89090_S58	TB_02H-MOCK_00H	-0.843822	0.0518792	0.324442	no	-0.843822	0.0518792
O89110	Casp8	caspase 8	12370	O89110_S188	TB_02H-MOCK_00H	-0.354326	0.66332	0.908483	no	-0.354326	0.66332
O89110	Casp8	caspase 8	12370	O89110_S213	TB_02H-MOCK_00H	1.27987	0.00903011	0.126655	no	1.27987	0.00903011
P01101	Fos	FBJ osteosarcoma oncogene	14281	P01101_S364;P01101_S373	TB_02H-MOCK_00H	#NUM!		0	yes	11.0434	0.0373745
P01101	Fos	FBJ osteosarcoma oncogene	14281	P01101_S371;P01101_S373	TB_02H-MOCK_00H	#NUM!		0	yes	6.1273	0.0209645
P01899	H2-D1	histocompatibility 2, D region locus 1	14964	P01899_S350;P01899_S352	TB_02H-MOCK_00H	-0.308027	0.489905	0.836357	no	-0.308027	0.489905
P01899	H2-D1	histocompatibility 2, D region locus 1	14964	P01899_S350;P01899_S356	TB_02H-MOCK_00H	-1.03065	0.085411	0.41825	no	-1.03065	0.085411
P01899	H2-D1	histocompatibility 2, D region locus 1	14964	P01899_S356	TB_02H-MOCK_00H	0.347739	0.336782	0.760236	no	0.347739	0.336782
P01901	H2-K1	histocompatibility 2, K1, K region	14972	P01901_S354	TB_02H-MOCK_00H	0.195235	0.563917	0.866281	no	0.195235	0.563917
P01901	H2-K1	histocompatibility 2, K1, K region	14972	P01901_S367	TB_02H-MOCK_00H	0.0222425	0.949023	0.983996	no	0.0222425	0.949023
P01901	H2-K1	histocompatibility 2, K1, K region	14972	P01901_T350;P01901_S351	TB_02H-MOCK_00H	-0.288049	0.576834	0.8704	no	-0.288049	0.576834
P01902	P01902			P01902_Y105;P01902_S113;P01902_T115	TB_02H-MOCK_00H	-0.465954	0.220277	0.647508	no	-0.465954	0.220277
P04627	Araf	Araf proto-oncogene, serine/threonine kinase	11836	P04627_S157	TB_02H-MOCK_00H	0.960185	0.0197349	0.195354	no	0.960185	0.0197349
P04627	Araf	Araf proto-oncogene, serine/threonine kinase	11836	P04627_S175;P04627_S186	TB_02H-MOCK_00H	2.40021	0.00658676	0.104553	no	2.40021	0.00658676
P04627	Araf	Araf proto-oncogene, serine/threonine kinase	11836	P04627_S229	TB_02H-MOCK_00H	0.621763	0.0686042	0.375283	no	0.621763	0.0686042
P04627	Araf	Araf proto-oncogene, serine/threonine kinase	11836	P04627_S580	TB_02H-MOCK_00H	0.378783	0.15319	0.550504	no	0.378783	0.15319
P04627	Araf	Araf proto-oncogene, serine/threonine kinase	11836	P04627_T181;P04627_S186	TB_02H-MOCK_00H	#NUM!		0	yes	7.70625	0.0366014
P04627	Araf	Araf proto-oncogene, serine/threonine kinase	11836	P04627_Y155	TB_02H-MOCK_00H	-0.23666	0.443727	0.816678	no	-0.23666	0.443727
P05064	Aldoa	aldolase A, fructose-bisphosphate	11674	P05064_S36	TB_02H-MOCK_00H	-0.0759005	0.79374	0.951131	no	-0.0759005	0.79374
P05064	Aldoa	aldolase A, fructose-bisphosphate	11674	P05064_S39	TB_02H-MOCK_00H	-0.0738696	0.833455	0.959836	no	-0.0738696	0.833455
P05064	Aldoa	aldolase A, fructose-bisphosphate	11674	P05064_S46	TB_02H-MOCK_00H	-0.250165	0.652982	0.903543	no	-0.250165	0.652982
P05064	Aldoa	aldolase A, fructose-bisphosphate	11674	P05064_T37	TB_02H-MOCK_00H	-0.0416513	0.947353	0.983784	no	-0.0416513	0.947353
P05213	Tuba1b	tubulin, alpha 1B	22143	P05213_S340	TB_02H-MOCK_00H	-0.076326	0.70906	0.922543	no	-0.076326	0.70906
P05627	Jun	jun proto-oncogene	16476	P05627_S246	TB_02H-MOCK_00H	1.01737	0.00572606	0.0950643	no	1.01737	0.00572606
P05627	Jun	jun proto-oncogene	16476	P05627_T242;P05627_S246	TB_02H-MOCK_00H	-0.658401	0.238964	0.668606	no	-0.658401	0.238964
P06745	Gpi1	glucose phosphate isomerase 1	14751	P06745_S107	TB_02H-MOCK_00H	#NUM!		0	yes	4.96265	0.0165287
P06800	P06800			P06800_S1227	TB_02H-MOCK_00H	-0.0544457	0.914678	0.977117	no	-0.0544457	0.914678
P06800	P06800			P06800_S1260	TB_02H-MOCK_00H	1.33249	0.0597834	0.350162	no	1.33249	0.0597834
P06800	P06800			P06800_S1271	TB_02H-MOCK_00H	1.61452	0.151829	0.548034	no	1.61452	0.151829
P06800	P06800			P06800_S1282	TB_02H-MOCK_00H	2.18309	0.00242043	0.0561559	no	2.18309	0.00242043
P06800	P06800			P06800_S1282;P06800_S1284	TB_02H-MOCK_00H	-0.590665	0.193808	0.611393	no	-0.590665	0.193808
P06800	P06800			P06800_S962	TB_02H-MOCK_00H	0.608559	0.456561	0.823788	no	0.608559	0.456561
P06800	P06800			P06800_T1225	TB_02H-MOCK_00H	0.632378	0.0398505	0.286888	no	0.632378	0.0398505
P06800	P06800			P06800_T1265	TB_02H-MOCK_00H	1.02417	0.189001	0.60622	no	1.02417	0.189001
P07356	Anxa2	annexin A2	12306	P07356_S2	TB_02H-MOCK_00H	-0.575955	0.0458999	0.310043	no	-0.575955	0.0458999
P07356	Anxa2	annexin A2	12306	P07356_T3	TB_02H-MOCK_00H	0.0967454	0.617001	0.890287	no	0.0967454	0.617001
P08775	Polr2a	polymerase (RNA) II (DNA directed) polypeptide A	20020	P08775_S1845	TB_02H-MOCK_00H	-0.321689	0.302923	0.729154	no	-0.321689	0.302923
P08775	Polr2a	polymerase (RNA) II (DNA directed) polypeptide A	20020	P08775_S1892	TB_02H-MOCK_00H	0.0414648	0.886443	0.970483	no	0.0414648	0.886443
P08775	Polr2a	polymerase (RNA) II (DNA directed) polypeptide A	20020	P08775_S1913;P08775_S1920	TB_02H-MOCK_00H	0.116312	0.777987	0.947798	no	0.116312	0.777987
P08775	Polr2a	polymerase (RNA) II (DNA directed) polypeptide A	20020	P08775_S1966	TB_02H-MOCK_00H	0.108325	0.670955	0.910071	no	0.108325	0.670955
P08775	Polr2a	polymerase (RNA) II (DNA directed) polypeptide A	20020	P08775_T1840;P08775_S1847	TB_02H-MOCK_00H	-0.0956778	0.806334	0.953773	no	-0.0956778	0.806334
P08775	Polr2a	polymerase (RNA) II (DNA directed) polypeptide A	20020	P08775_T1870;P08775_S1882	TB_02H-MOCK_00H	0.417877	0.475569	0.828419	no	0.417877	0.475569
P08775	Polr2a	polymerase (RNA) II (DNA directed) polypeptide A	20020	P08775_T1877	TB_02H-MOCK_00H	0.390744	0.28754	0.716977	no	0.390744	0.28754
P08775	Polr2a	polymerase (RNA) II (DNA directed) polypeptide A	20020	P08775_T1912	TB_02H-MOCK_00H	0.715068	0.221178	0.647957	no	0.715068	0.221178
P09411	Pgk1	phosphoglycerate kinase 1	18655	P09411_S203	TB_02H-MOCK_00H	-0.232056	0.308045	0.735151	no	-0.232056	0.308045
P09411	Pgk1	phosphoglycerate kinase 1	18655	P09411_S77;P09411_S87	TB_02H-MOCK_00H	1.47877	0.484979	0.83359	no	1.47877	0.484979
P09450	Junb	jun B proto-oncogene	16477	P09450_S248	TB_02H-MOCK_00H	1.93639	0.00971824	0.132314	no	1.93639	0.00971824
P09450	Junb	jun B proto-oncogene	16477	P09450_S248;P09450_T252;P09450_S256	TB_02H-MOCK_00H	1.788	0.00428284	0.0813565	no	1.788	0.00428284
P09450	Junb	jun B proto-oncogene	16477	P09450_S256	TB_02H-MOCK_00H	0.52578	0.349783	0.771412	no	0.52578	0.349783
P09450	Junb	jun B proto-oncogene	16477	P09450_T252;P09450_S256	TB_02H-MOCK_00H	3.85847	7.59393e-14	4.94213e-10	no	3.85847	7.59393e-14
P09528	Fth1	ferritin heavy polypeptide 1	14319	P09528_S5	TB_02H-MOCK_00H	-0.359456	0.714078	0.922887	no	-0.359456	0.714078
P09528	Fth1	ferritin heavy polypeptide 1	14319	P09528_T2	TB_02H-MOCK_00H	#NUM!		0	yes	3.73644	0.0346703
P09528	Fth1	ferritin heavy polypeptide 1	14319	P09528_T3	TB_02H-MOCK_00H	0.484674	0.345171	0.768816	no	0.484674	0.345171
P0C7T6	Atxn1l	ataxin 1-like	52335	P0C7T6_T328	TB_02H-MOCK_00H	-0.106113	0.836129	0.959836	no	-0.106113	0.836129
P0DOV1	Ifi211	interferon activated gene 211	381308	P0DOV1_S190	TB_02H-MOCK_00H	-0.491827	0.191585	0.609698	no	-0.491827	0.191585
P0DOV2	Ifi204	interferon activated gene 204	15951	P0DOV2_S190	TB_02H-MOCK_00H	0.319319	0.307955	0.735151	no	0.319319	0.307955
P0DOV2	Ifi204	interferon activated gene 204	15951	P0DOV2_S195;P0DOV2_S205	TB_02H-MOCK_00H	0.059096	0.960145	0.987454	no	0.059096	0.960145
P0DOV2	Ifi204	interferon activated gene 204	15951	P0DOV2_T106	TB_02H-MOCK_00H	-0.214947	0.628865	0.895352	no	-0.214947	0.628865
P0DOV2	Ifi204	interferon activated gene 204	15951	P0DOV2_T90	TB_02H-MOCK_00H	0.120101	0.793313	0.951131	no	0.120101	0.793313
P10107	Anxa1	annexin A1	16952	P10107_S5	TB_02H-MOCK_00H	0.140247	0.889275	0.971367	no	0.140247	0.889275
P10923	Spp1	secreted phosphoprotein 1	20750	P10923_S283;P10923_S289	TB_02H-MOCK_00H	-0.664986	0.193736	0.611393	no	-0.664986	0.193736
P10923	Spp1	secreted phosphoprotein 1	20750	P10923_S290	TB_02H-MOCK_00H	0.253659	0.491356	0.836357	no	0.253659	0.491356
P11157	Rrm2	ribonucleotide reductase M2	20135	P11157_S20	TB_02H-MOCK_00H	-0.546453	0.190024	0.607405	no	-0.546453	0.190024
P11440	Cdk1	cyclin-dependent kinase 1	12534	P11440_T14	TB_02H-MOCK_00H	0.179421	0.667091	0.90939	no	0.179421	0.667091
P11440	Cdk1	cyclin-dependent kinase 1	12534	P11440_T14;P11440_Y15	TB_02H-MOCK_00H	0.104508	0.909171	0.976517	no	0.104508	0.909171
P11440	Cdk1	cyclin-dependent kinase 1	12534	P11440_Y15	TB_02H-MOCK_00H	0.921944	0.446511	0.818882	no	0.921944	0.446511
P11499	Hsp90ab1	heat shock protein 90 alpha (cytosolic), class B member 1	15516	P11499_S255	TB_02H-MOCK_00H	-0.32947	0.576566	0.870197	no	-0.32947	0.576566
P11835	Itgb2	integrin beta 2	16414	P11835_T760	TB_02H-MOCK_00H	-0.729224	0.0692029	0.376314	no	-0.729224	0.0692029
P11881	Itpr1	inositol 1,4,5-trisphosphate receptor 1	16438	P11881_S1588	TB_02H-MOCK_00H	-0.298615	0.419153	0.80935	no	-0.298615	0.419153
P12367	P12367			P12367_S96	TB_02H-MOCK_00H	-0.00128336	0.998487	0.999601	no	-0.00128336	0.998487
P12382	Pfkl	phosphofructokinase, liver, B-type	18641	P12382_S775	TB_02H-MOCK_00H	0.197366	0.5067	0.844889	no	0.197366	0.5067
P13808	Slc4a2	solute carrier family 4 (anion exchanger), member 2	20535	P13808_S172	TB_02H-MOCK_00H	-0.0369718	0.97528	0.99312	no	-0.0369718	0.97528
P13808	Slc4a2	solute carrier family 4 (anion exchanger), member 2	20535	P13808_S439;P13808_T455	TB_02H-MOCK_00H	1.48743	0.0130551	0.157229	no	1.48743	0.0130551
P13808	Slc4a2	solute carrier family 4 (anion exchanger), member 2	20535	P13808_S442;P13808_T455	TB_02H-MOCK_00H	0.584875	0.502904	0.844089	no	0.584875	0.502904
P13864	Dnmt1	DNA methyltransferase (cytosine-5) 1	13433	P13864_S125	TB_02H-MOCK_00H	-0.982063	0.0701284	0.378437	no	-0.982063	0.0701284
P13864	Dnmt1	DNA methyltransferase (cytosine-5) 1	13433	P13864_S138	TB_02H-MOCK_00H	-0.303855	0.473549	0.828419	no	-0.303855	0.473549
P13864	Dnmt1	DNA methyltransferase (cytosine-5) 1	13433	P13864_S140	TB_02H-MOCK_00H	-0.250803	0.677295	0.91037	no	-0.250803	0.677295
P13864	Dnmt1	DNA methyltransferase (cytosine-5) 1	13433	P13864_S717	TB_02H-MOCK_00H	-0.110058	0.728524	0.929471	no	-0.110058	0.728524
P14152	Mdh1	malate dehydrogenase 1, NAD (soluble)	17449	P14152_S241	TB_02H-MOCK_00H	0.273809	0.476722	0.828419	no	0.273809	0.476722
P14733	Lmnb1	lamin B1	16906	P14733_S14	TB_02H-MOCK_00H	-0.271264	0.546116	0.860369	no	-0.271264	0.546116
P14733	Lmnb1	lamin B1	16906	P14733_S17	TB_02H-MOCK_00H	0.96277	0.010718	0.140915	no	0.96277	0.010718
P14733	Lmnb1	lamin B1	16906	P14733_S24	TB_02H-MOCK_00H	0.43931	0.081981	0.408359	no	0.43931	0.081981
P14733	Lmnb1	lamin B1	16906	P14733_S392	TB_02H-MOCK_00H	0.43476	0.319941	0.746299	no	0.43476	0.319941
P14733	Lmnb1	lamin B1	16906	P14733_S392;P14733_S394	TB_02H-MOCK_00H	-0.455029	0.631888	0.897686	no	-0.455029	0.631888
P14733	Lmnb1	lamin B1	16906	P14733_S392;P14733_S397	TB_02H-MOCK_00H	#NUM!		0	yes	-5.23416	0.0403516
P14733	Lmnb1	lamin B1	16906	P14733_S402	TB_02H-MOCK_00H	-0.414143	0.352099	0.772066	no	-0.414143	0.352099
P14733	Lmnb1	lamin B1	16906	P14733_T21	TB_02H-MOCK_00H	#NUM!		0	yes	6.72241	0.0383271
P14733	Lmnb1	lamin B1	16906	P14733_T5	TB_02H-MOCK_00H	-0.317912	0.402061	0.805493	no	-0.317912	0.402061
P14901	Hmox1	heme oxygenase 1	15368	P14901_S242	TB_02H-MOCK_00H	-0.0299894	0.911685	0.976666	no	-0.0299894	0.911685
P15066	Jund	jun D proto-oncogene	16478	P15066_S100	TB_02H-MOCK_00H	0.977356	2.54923e-06	0.000553014	no	0.977356	2.54923e-06
P15066	Jund	jun D proto-oncogene	16478	P15066_S245;P15066_S253	TB_02H-MOCK_00H	-1.42083	0.207069	0.631198	no	-1.42083	0.207069
P15066	Jund	jun D proto-oncogene	16478	P15066_S249;P15066_S253	TB_02H-MOCK_00H	0.0275139	0.976686	0.993346	no	0.0275139	0.976686
P15261	Ifngr1	interferon gamma receptor 1	15979	P15261_S300	TB_02H-MOCK_00H	0.741599	0.054151	0.33411	no	0.741599	0.054151
P15261	Ifngr1	interferon gamma receptor 1	15979	P15261_S370;P15261_T373	TB_02H-MOCK_00H	1.08695	0.129947	0.505614	no	1.08695	0.129947
P15261	Ifngr1	interferon gamma receptor 1	15979	P15261_S379	TB_02H-MOCK_00H	-1.07651	0.0201558	0.196958	no	-1.07651	0.0201558
P15261	Ifngr1	interferon gamma receptor 1	15979	P15261_S381	TB_02H-MOCK_00H	-0.0837847	0.814644	0.956362	no	-0.0837847	0.814644
P15261	Ifngr1	interferon gamma receptor 1	15979	P15261_S402	TB_02H-MOCK_00H	-0.50932	0.226081	0.654509	no	-0.50932	0.226081
P15261	Ifngr1	interferon gamma receptor 1	15979	P15261_S404	TB_02H-MOCK_00H	-1.37455	0.17675	0.590801	no	-1.37455	0.17675
P15261	Ifngr1	interferon gamma receptor 1	15979	P15261_T363;P15261_S370	TB_02H-MOCK_00H	0.599539	0.234109	0.663292	no	0.599539	0.234109
P15261	Ifngr1	interferon gamma receptor 1	15979	P15261_T373	TB_02H-MOCK_00H	-0.493342	0.138862	0.521472	no	-0.493342	0.138862
P15379	Cd44	CD44 antigen	12505	P15379_S733	TB_02H-MOCK_00H	-3.13501	0.000522424	0.0197759	no	-3.13501	0.000522424
P15379	Cd44	CD44 antigen	12505	P15379_S754	TB_02H-MOCK_00H	0.107177	0.913622	0.977117	no	0.107177	0.913622
P15379	Cd44	CD44 antigen	12505	P15379_T726	TB_02H-MOCK_00H	-2.20019	0.000583321	0.0216084	no	-2.20019	0.000583321
P15533	Trim30a	tripartite motif-containing 30A	20128	P15533_S260	TB_02H-MOCK_00H	0.6233	0.0435121	0.30186	no	0.6233	0.0435121
P15533	Trim30a	tripartite motif-containing 30A	20128	P15533_S3	TB_02H-MOCK_00H	1.99263	0.376416	0.792789	no	1.99263	0.376416
P15864	Hist1h1c	histone cluster 1, H1c	50708	P15864_S102	TB_02H-MOCK_00H	-1.95106	0.0019598	0.0483294	no	-1.95106	0.0019598
P15864	Hist1h1c	histone cluster 1, H1c	50708	P15864_S104	TB_02H-MOCK_00H	0.766152	0.516734	0.848617	no	0.766152	0.516734
P15864	Hist1h1c	histone cluster 1, H1c	50708	P15864_S2	TB_02H-MOCK_00H	0.295262	0.153854	0.551672	no	0.295262	0.153854
P15864	Hist1h1c	histone cluster 1, H1c	50708	P15864_S36	TB_02H-MOCK_00H	0.864576	0.00388406	0.0769579	no	0.864576	0.00388406
P15920	Atp6v0a2	ATPase, H+ transporting, lysosomal V0 subunit A2	21871	P15920_S695	TB_02H-MOCK_00H	0.220645	0.409645	0.808847	no	0.220645	0.409645
P15920	Atp6v0a2	ATPase, H+ transporting, lysosomal V0 subunit A2	21871	P15920_S700	TB_02H-MOCK_00H	0.268881	0.432969	0.815184	no	0.268881	0.432969
P16254	Srp14	signal recognition particle 14	20813	P16254_S45	TB_02H-MOCK_00H	-1.48121	0.000123273	0.00742834	no	-1.48121	0.000123273
P16330	Cnp	2',3'-cyclic nucleotide 3' phosphodiesterase	12799	P16330_S4	TB_02H-MOCK_00H	-0.385371	0.224513	0.653166	no	-0.385371	0.224513
P16858	Gapdh	glyceraldehyde-3-phosphate dehydrogenase	14433	P16858_S146	TB_02H-MOCK_00H	-0.540217	0.0622231	0.358044	no	-0.540217	0.0622231
P16858	Gapdh	glyceraldehyde-3-phosphate dehydrogenase	14433	P16858_S208	TB_02H-MOCK_00H	-0.0246939	0.911418	0.976666	no	-0.0246939	0.911418
P16872	Il7r	interleukin 7 receptor	16197	P16872_S375	TB_02H-MOCK_00H	0.669837	0.0184403	0.187808	no	0.669837	0.0184403
P16879	Fes	feline sarcoma oncogene	14159	P16879_Y713	TB_02H-MOCK_00H	0.20511	0.489644	0.836357	no	0.20511	0.489644
P16951	Atf2	activating transcription factor 2	11909	P16951_S310	TB_02H-MOCK_00H	0.609985	0.082199	0.408359	no	0.609985	0.082199
P16951	Atf2	activating transcription factor 2	11909	P16951_S44	TB_02H-MOCK_00H	0.192772	0.475364	0.828419	no	0.192772	0.475364
P16951	Atf2	activating transcription factor 2	11909	P16951_S44;P16951_T53	TB_02H-MOCK_00H	-0.27812	0.760131	0.940926	no	-0.27812	0.760131
P16951	Atf2	activating transcription factor 2	11909	P16951_T51;P16951_T53	TB_02H-MOCK_00H	0.152032	0.806866	0.954049	no	0.152032	0.806866
P16951	Atf2	activating transcription factor 2	11909	P16951_T51;P16951_T55	TB_02H-MOCK_00H	-0.337042	0.614342	0.889337	no	-0.337042	0.614342
P17095	Hmga1	high mobility group AT-hook 1	15361	P17095_S102	TB_02H-MOCK_00H	1.00834	0.171089	0.583261	no	1.00834	0.171089
P17095	Hmga1	high mobility group AT-hook 1	15361	P17095_S102;P17095_S103	TB_02H-MOCK_00H	1.37787	0.217498	0.642815	no	1.37787	0.217498
P17095	Hmga1	high mobility group AT-hook 1	15361	P17095_S103	TB_02H-MOCK_00H	-0.490963	0.671355	0.910071	no	-0.490963	0.671355
P17095	Hmga1	high mobility group AT-hook 1	15361	P17095_S2	TB_02H-MOCK_00H	0.24447	0.488856	0.836357	no	0.24447	0.488856
P17095	Hmga1	high mobility group AT-hook 1	15361	P17095_S2;P17095_S4	TB_02H-MOCK_00H	-0.90093	0.169523	0.580702	no	-0.90093	0.169523
P17095	Hmga1	high mobility group AT-hook 1	15361	P17095_S2;P17095_S6	TB_02H-MOCK_00H	-1.06044	0.327019	0.752985	no	-1.06044	0.327019
P17095	Hmga1	high mobility group AT-hook 1	15361	P17095_S36	TB_02H-MOCK_00H	0.0148549	0.987959	0.995976	no	0.0148549	0.987959
P17095	Hmga1	high mobility group AT-hook 1	15361	P17095_S8	TB_02H-MOCK_00H	-0.595459	0.244398	0.675675	no	-0.595459	0.244398
P17095	Hmga1	high mobility group AT-hook 1	15361	P17095_S99;P17095_S102	TB_02H-MOCK_00H	1.42051	0.130441	0.50651	no	1.42051	0.130441
P17095	Hmga1	high mobility group AT-hook 1	15361	P17095_S99;P17095_S103	TB_02H-MOCK_00H	#NUM!		0	yes	6.69699	0.0204553
P17095	Hmga1	high mobility group AT-hook 1	15361	P17095_T39	TB_02H-MOCK_00H	#NUM!		0	yes	6.83828	0.0474156
P17182	Eno1	enolase 1, alpha non-neuron	13806	P17182_Y25	TB_02H-MOCK_00H	#NUM!		0	yes	7.61634	0.031383
P17426	Ap2a1	adaptor-related protein complex 2, alpha 1 subunit	11771	P17426_S5	TB_02H-MOCK_00H	-5.11041	0.00959664	0.131208	no	-5.11041	0.00959664
P17426	Ap2a1	adaptor-related protein complex 2, alpha 1 subunit	11771	P17426_T653	TB_02H-MOCK_00H	-0.0501557	0.912975	0.977117	no	-0.0501557	0.912975
P17751	Tpi1	triosephosphate isomerase 1	21991	P17751_S254	TB_02H-MOCK_00H	0.388837	0.458002	0.823925	no	0.388837	0.458002
P17751	Tpi1	triosephosphate isomerase 1	21991	P17751_S262	TB_02H-MOCK_00H	-0.182592	0.418382	0.80935	no	-0.182592	0.418382
P18052	Ptpra	protein tyrosine phosphatase, receptor type, A	19262	P18052_Y825	TB_02H-MOCK_00H	0.10616	0.685801	0.915152	no	0.10616	0.685801
P18581	Slc7a2	solute carrier family 7 (cationic amino acid transporter, y+ system), member 2	11988	P18581_S461;P18581_S463	TB_02H-MOCK_00H	0.816	0.0274867	0.233034	no	0.816	0.0274867
P18608	Hmgn1	high mobility group nucleosomal binding domain 1	15312	P18608_S7	TB_02H-MOCK_00H	2.072	0.000658019	0.0236596	no	2.072	0.000658019
P18608	Hmgn1	high mobility group nucleosomal binding domain 1	15312	P18608_S84;P18608_S87	TB_02H-MOCK_00H	0.0929793	0.892928	0.972654	no	0.0929793	0.892928
P18608	Hmgn1	high mobility group nucleosomal binding domain 1	15312	P18608_S87	TB_02H-MOCK_00H	-0.221929	0.775638	0.946353	no	-0.221929	0.775638
P18608	Hmgn1	high mobility group nucleosomal binding domain 1	15312	P18608_S95	TB_02H-MOCK_00H	0.765156	0.147976	0.539783	no	0.765156	0.147976
P18608	Hmgn1	high mobility group nucleosomal binding domain 1	15312	P18608_T80;P18608_S84	TB_02H-MOCK_00H	-1.01677	0.195889	0.615275	no	-1.01677	0.195889
P18653	Rps6ka1	ribosomal protein S6 kinase polypeptide 1	20111	P18653_S352	TB_02H-MOCK_00H	0.0364327	0.934012	0.981534	no	0.0364327	0.934012
P18653	Rps6ka1	ribosomal protein S6 kinase polypeptide 1	20111	P18653_S352;P18653_S358	TB_02H-MOCK_00H	1.52868	0.00759617	0.114435	no	1.52868	0.00759617
P18653	Rps6ka1	ribosomal protein S6 kinase polypeptide 1	20111	P18653_S369	TB_02H-MOCK_00H	1.62285	0.00014588	0.00855304	no	1.62285	0.00014588
P18653	Rps6ka1	ribosomal protein S6 kinase polypeptide 1	20111	P18653_S721	TB_02H-MOCK_00H	0.582605	0.0303405	0.246072	no	0.582605	0.0303405
P18653	Rps6ka1	ribosomal protein S6 kinase polypeptide 1	20111	P18653_T348	TB_02H-MOCK_00H	0.768005	0.441818	0.816643	no	0.768005	0.441818
P18653	Rps6ka1	ribosomal protein S6 kinase polypeptide 1	20111	P18653_T722	TB_02H-MOCK_00H	0.491198	0.0480442	0.314007	no	0.491198	0.0480442
P18654	Rps6ka3	ribosomal protein S6 kinase polypeptide 3	110651	P18654_S227	TB_02H-MOCK_00H	0.373072	0.454643	0.823788	no	0.373072	0.454643
P18654	Rps6ka3	ribosomal protein S6 kinase polypeptide 3	110651	P18654_S369	TB_02H-MOCK_00H	-2.05588	1.14044e-05	0.00145529	no	-2.05588	1.14044e-05
P18654	Rps6ka3	ribosomal protein S6 kinase polypeptide 3	110651	P18654_S369;P18654_S375	TB_02H-MOCK_00H	0.454707	0.37288	0.790714	no	0.454707	0.37288
P18654	Rps6ka3	ribosomal protein S6 kinase polypeptide 3	110651	P18654_S386	TB_02H-MOCK_00H	2.07175	0.0456433	0.309424	no	2.07175	0.0456433
P18654	Rps6ka3	ribosomal protein S6 kinase polypeptide 3	110651	P18654_S715	TB_02H-MOCK_00H	0.0452264	0.779496	0.948065	no	0.0452264	0.779496
P18654	Rps6ka3	ribosomal protein S6 kinase polypeptide 3	110651	P18654_T231	TB_02H-MOCK_00H	0.54759	0.308781	0.736141	no	0.54759	0.308781
P18654	Rps6ka3	ribosomal protein S6 kinase polypeptide 3	110651	P18654_T365	TB_02H-MOCK_00H	-1.65983	0.109296	0.474291	no	-1.65983	0.109296
P18654	Rps6ka3	ribosomal protein S6 kinase polypeptide 3	110651	P18654_T365;P18654_S375	TB_02H-MOCK_00H	0.973815	0.0322909	0.254589	no	0.973815	0.0322909
P18654	Rps6ka3	ribosomal protein S6 kinase polypeptide 3	110651	P18654_T738	TB_02H-MOCK_00H	0.199213	0.574046	0.869901	no	0.199213	0.574046
P18760	Cfl1	cofilin 1, non-muscle	12631	P18760_S3	TB_02H-MOCK_00H	0.360199	0.228455	0.657289	no	0.360199	0.228455
P19324	Serpinh1	serine (or cysteine) peptidase inhibitor, clade H, member 1	12406	P19324_S69;P19324_S75;P19324_S81;P19324_T87;P19324_S90	TB_02H-MOCK_00H	#NUM!		0	yes	-6.52627	0.0298177
P19426	Nelfe	negative elongation factor complex member E, Rdbp	27632	P19426_S115	TB_02H-MOCK_00H	-0.601819	0.279127	0.70727	no	-0.601819	0.279127
P19426	Nelfe	negative elongation factor complex member E, Rdbp	27632	P19426_S49	TB_02H-MOCK_00H	0.401553	0.745257	0.935051	no	0.401553	0.745257
P19426	Nelfe	negative elongation factor complex member E, Rdbp	27632	P19426_S51	TB_02H-MOCK_00H	-0.318351	0.49267	0.836826	no	-0.318351	0.49267
P19973	Lsp1	lymphocyte specific 1	16985	P19973_S168;P19973_S179	TB_02H-MOCK_00H	#NUM!		0	yes	-6.1383	0.0310729
P19973	Lsp1	lymphocyte specific 1	16985	P19973_S168;P19973_S179;P19973_S184	TB_02H-MOCK_00H	-0.958871	0.102386	0.459811	no	-0.958871	0.102386
P19973	Lsp1	lymphocyte specific 1	16985	P19973_S168;P19973_S180;P19973_S184	TB_02H-MOCK_00H	-0.323635	0.714428	0.922887	no	-0.323635	0.714428
P19973	Lsp1	lymphocyte specific 1	16985	P19973_S179;P19973_S184	TB_02H-MOCK_00H	0.134056	0.861009	0.966645	no	0.134056	0.861009
P19973	Lsp1	lymphocyte specific 1	16985	P19973_S195	TB_02H-MOCK_00H	0.225627	0.739136	0.932307	no	0.225627	0.739136
P19973	Lsp1	lymphocyte specific 1	16985	P19973_S203	TB_02H-MOCK_00H	-0.166749	0.711942	0.922887	no	-0.166749	0.711942
P19973	Lsp1	lymphocyte specific 1	16985	P19973_S239;P19973_S243	TB_02H-MOCK_00H	-0.201946	0.662203	0.908136	no	-0.201946	0.662203
P19973	Lsp1	lymphocyte specific 1	16985	P19973_S243	TB_02H-MOCK_00H	0.12642	0.710985	0.922887	no	0.12642	0.710985
P19973	Lsp1	lymphocyte specific 1	16985	P19973_S248	TB_02H-MOCK_00H	-0.327641	0.642056	0.901169	no	-0.327641	0.642056
P19973	Lsp1	lymphocyte specific 1	16985	P19973_T166;P19973_S168	TB_02H-MOCK_00H	-2.54076	0.000369097	0.0152465	no	-2.54076	0.000369097
P19973	Lsp1	lymphocyte specific 1	16985	P19973_T166;P19973_S168;P19973_S179	TB_02H-MOCK_00H	#NUM!		0	yes	-7.3465	0.0158064
P19973	Lsp1	lymphocyte specific 1	16985	P19973_T166;P19973_S168;P19973_S179;P19973_S184	TB_02H-MOCK_00H	-1.82846	0.109442	0.474291	no	-1.82846	0.109442
P19973	Lsp1	lymphocyte specific 1	16985	P19973_T166;P19973_S168;P19973_S180	TB_02H-MOCK_00H	-1.36733	0.195777	0.615275	no	-1.36733	0.195777
P19973	Lsp1	lymphocyte specific 1	16985	P19973_T175	TB_02H-MOCK_00H	#NUM!		0	yes	-8.37772	0.0373511
P20029	Hspa5	heat shock protein 5	14828	P20029_T644	TB_02H-MOCK_00H	1.13006	0.191882	0.610047	no	1.13006	0.191882
P20060	Hexb	hexosaminidase B	15212	P20060_T497;P20060_Y505	TB_02H-MOCK_00H	2.44144	0.0216094	0.203818	no	2.44144	0.0216094
P20152	Vim	vimentin	22352	P20152_S144	TB_02H-MOCK_00H	-0.302424	0.309034	0.736162	no	-0.302424	0.309034
P20152	Vim	vimentin	22352	P20152_S214	TB_02H-MOCK_00H	0.207884	0.690409	0.915854	no	0.207884	0.690409
P20152	Vim	vimentin	22352	P20152_S278	TB_02H-MOCK_00H	#NUM!		0	yes	7.29392	0.0439913
P20152	Vim	vimentin	22352	P20152_S325	TB_02H-MOCK_00H	-0.348093	0.532451	0.857085	no	-0.348093	0.532451
P20152	Vim	vimentin	22352	P20152_S39	TB_02H-MOCK_00H	-0.862162	0.0317201	0.252674	no	-0.862162	0.0317201
P20152	Vim	vimentin	22352	P20152_S419	TB_02H-MOCK_00H	1.45844	0.0123812	0.152959	no	1.45844	0.0123812
P20152	Vim	vimentin	22352	P20152_S420	TB_02H-MOCK_00H	4.77934	0.0125272	0.152959	no	4.77934	0.0125272
P20152	Vim	vimentin	22352	P20152_S430	TB_02H-MOCK_00H	1.83348	0.00036799	0.0152465	no	1.83348	0.00036799
P20152	Vim	vimentin	22352	P20152_S438	TB_02H-MOCK_00H	0.089067	0.808996	0.954659	no	0.089067	0.808996
P20152	Vim	vimentin	22352	P20152_S459	TB_02H-MOCK_00H	0.400069	0.111116	0.475678	no	0.400069	0.111116
P20152	Vim	vimentin	22352	P20152_S47	TB_02H-MOCK_00H	1.71554	0.00112598	0.0340832	no	1.71554	0.00112598
P20152	Vim	vimentin	22352	P20152_S49	TB_02H-MOCK_00H	1.0246	0.0449123	0.307459	no	1.0246	0.0449123
P20152	Vim	vimentin	22352	P20152_S5	TB_02H-MOCK_00H	-0.194689	0.714226	0.922887	no	-0.194689	0.714226
P20152	Vim	vimentin	22352	P20152_S54	TB_02H-MOCK_00H	2.75258	0.32995	0.755829	no	2.75258	0.32995
P20152	Vim	vimentin	22352	P20152_S55	TB_02H-MOCK_00H	0.161573	0.79379	0.951131	no	0.161573	0.79379
P20152	Vim	vimentin	22352	P20152_S65	TB_02H-MOCK_00H	-0.204051	0.530068	0.856055	no	-0.204051	0.530068
P20152	Vim	vimentin	22352	P20152_S7	TB_02H-MOCK_00H	1.96295	0.111033	0.475678	no	1.96295	0.111033
P20152	Vim	vimentin	22352	P20152_S72	TB_02H-MOCK_00H	0.626302	0.559442	0.864398	no	0.626302	0.559442
P20152	Vim	vimentin	22352	P20152_S73	TB_02H-MOCK_00H	-2.1927	0.020253	0.197315	no	-2.1927	0.020253
P20152	Vim	vimentin	22352	P20152_S8;P20152_Y11	TB_02H-MOCK_00H	-2.02142	0.131861	0.50929	no	-2.02142	0.131861
P20152	Vim	vimentin	22352	P20152_S9	TB_02H-MOCK_00H	-0.396192	0.53651	0.858414	no	-0.396192	0.53651
P20152	Vim	vimentin	22352	P20152_T426	TB_02H-MOCK_00H	1.74064	0.0224364	0.207704	no	1.74064	0.0224364
P20152	Vim	vimentin	22352	P20152_T458	TB_02H-MOCK_00H	0.661736	0.598925	0.882774	no	0.661736	0.598925
P20152	Vim	vimentin	22352	P20152_T48	TB_02H-MOCK_00H	0.337255	0.668328	0.910071	no	0.337255	0.668328
P20152	Vim	vimentin	22352	P20152_T63	TB_02H-MOCK_00H	#NUM!		0	yes	-7.49774	0.0327669
P20152	Vim	vimentin	22352	P20152_Y53	TB_02H-MOCK_00H	0.729798	0.0423377	0.298048	no	0.729798	0.0423377
P20152	Vim	vimentin	22352	P20152_Y61	TB_02H-MOCK_00H	#NUM!		0	yes	5.69368	0.0414367
P20491	Fcer1g	Fc receptor, IgE, high affinity I, gamma polypeptide	14127	P20491_S72	TB_02H-MOCK_00H	-0.439863	0.510023	0.845791	no	-0.439863	0.510023
P20491	Fcer1g	Fc receptor, IgE, high affinity I, gamma polypeptide	14127	P20491_T70	TB_02H-MOCK_00H	-0.565838	0.192836	0.610992	no	-0.565838	0.192836
P20491	Fcer1g	Fc receptor, IgE, high affinity I, gamma polypeptide	14127	P20491_T75	TB_02H-MOCK_00H	0.67972	0.458394	0.823925	no	0.67972	0.458394
P20491	Fcer1g	Fc receptor, IgE, high affinity I, gamma polypeptide	14127	P20491_T78	TB_02H-MOCK_00H	3.54996	0.00166134	0.0434838	no	3.54996	0.00166134
P20491	Fcer1g	Fc receptor, IgE, high affinity I, gamma polypeptide	14127	P20491_Y76	TB_02H-MOCK_00H	-1.7033	0.326592	0.752643	no	-1.7033	0.326592
P20934	Evi2a	ecotropic viral integration site 2a	14017	P20934_S197	TB_02H-MOCK_00H	1.02664	0.128254	0.504338	no	1.02664	0.128254
P20934	Evi2a	ecotropic viral integration site 2a	14017	P20934_S197;P20934_S203	TB_02H-MOCK_00H	2.34189	1.49082e-05	0.00173254	no	2.34189	1.49082e-05
P20934	Evi2a	ecotropic viral integration site 2a	14017	P20934_T195	TB_02H-MOCK_00H	0.352418	0.45721	0.823788	no	0.352418	0.45721
P20934	Evi2a	ecotropic viral integration site 2a	14017	P20934_T208	TB_02H-MOCK_00H	-0.333951	0.412731	0.808847	no	-0.333951	0.412731
P21619	Lmnb2	lamin B2	16907	P21619_S397	TB_02H-MOCK_00H	0.0714825	0.878089	0.9699	no	0.0714825	0.878089
P21619	Lmnb2	lamin B2	16907	P21619_S398;P21619_S401	TB_02H-MOCK_00H	-1.0384	0.0752254	0.393218	no	-1.0384	0.0752254
P21619	Lmnb2	lamin B2	16907	P21619_S399	TB_02H-MOCK_00H	0.315604	0.43334	0.815184	no	0.315604	0.43334
P21619	Lmnb2	lamin B2	16907	P21619_S400	TB_02H-MOCK_00H	-0.543516	0.124795	0.498792	no	-0.543516	0.124795
P21619	Lmnb2	lamin B2	16907	P21619_S400;P21619_S402	TB_02H-MOCK_00H	-0.807651	0.204525	0.62726	no	-0.807651	0.204525
P21619	Lmnb2	lamin B2	16907	P21619_S400;P21619_S403	TB_02H-MOCK_00H	0.318736	0.695659	0.918022	no	0.318736	0.695659
P21619	Lmnb2	lamin B2	16907	P21619_S402	TB_02H-MOCK_00H	0.192417	0.458932	0.823925	no	0.192417	0.458932
P21619	Lmnb2	lamin B2	16907	P21619_S429	TB_02H-MOCK_00H	-0.573543	0.440036	0.816002	no	-0.573543	0.440036
P22682	Cbl	Casitas B-lineage lymphoma	12402	P22682_S617	TB_02H-MOCK_00H	-0.693711	0.0675564	0.372591	no	-0.693711	0.0675564
P22893	Zfp36	zinc finger protein 36	22695	P22893_S105	TB_02H-MOCK_00H	#NUM!		0	yes	4.51429	0.0240133
P22893	Zfp36	zinc finger protein 36	22695	P22893_S178	TB_02H-MOCK_00H	3.95455	3.04758e-09	4.95842e-06	no	3.95455	3.04758e-09
P22893	Zfp36	zinc finger protein 36	22695	P22893_S264;P22893_S266	TB_02H-MOCK_00H	0.896413	0.156069	0.555936	no	0.896413	0.156069
P22893	Zfp36	zinc finger protein 36	22695	P22893_S316	TB_02H-MOCK_00H	#NUM!		0	yes	8.04231	0.0260448
P22893	Zfp36	zinc finger protein 36	22695	P22893_S50	TB_02H-MOCK_00H	#NUM!		0	yes	-5.9911	0.0470353
P22893	Zfp36	zinc finger protein 36	22695	P22893_S52	TB_02H-MOCK_00H	#NUM!		0	yes	12.9713	0.0463669
P22893	Zfp36	zinc finger protein 36	22695	P22893_S80;P22893_S82	TB_02H-MOCK_00H	#NUM!		0	yes	10.0847	0.0104332
P22893	Zfp36	zinc finger protein 36	22695	P22893_S80;P22893_T84;P22893_S85	TB_02H-MOCK_00H	#NUM!		0	yes	7.65576	0.0127185
P22893	Zfp36	zinc finger protein 36	22695	P22893_S82	TB_02H-MOCK_00H	#NUM!		0	yes	9.04627	0.0259178
P23116	Eif3a	eukaryotic translation initiation factor 3, subunit A	13669	P23116_S584	TB_02H-MOCK_00H	#NUM!		0	yes	7.40534	0.0432535
P23198	P23198			P23198_S176	TB_02H-MOCK_00H	-0.604932	0.0939762	0.44095	no	-0.604932	0.0939762
P23198	P23198			P23198_S93	TB_02H-MOCK_00H	0.400908	0.519795	0.850512	no	0.400908	0.519795
P23198	P23198			P23198_S95	TB_02H-MOCK_00H	-0.1895	0.78596	0.948601	no	-0.1895	0.78596
P23198	P23198			P23198_S97	TB_02H-MOCK_00H	-0.462145	0.335502	0.759454	no	-0.462145	0.335502
P23298	Prkch	protein kinase C, eta	18755	P23298_S317	TB_02H-MOCK_00H	0.164623	0.530095	0.856055	no	0.164623	0.530095
P23298	Prkch	protein kinase C, eta	18755	P23298_S675	TB_02H-MOCK_00H	-0.0844083	0.697404	0.918022	no	-0.0844083	0.697404
P23708	Nfya	nuclear transcription factor-Y alpha	18044	P23708_S325	TB_02H-MOCK_00H	#NUM!		0	yes	-6.01041	0.0445379
P23804	Mdm2	transformed mouse 3T3 cell double minute 2	17246	P23804_S161	TB_02H-MOCK_00H	1.79203	0.172531	0.585417	no	1.79203	0.172531
P23804	Mdm2	transformed mouse 3T3 cell double minute 2	17246	P23804_S161;P23804_S163	TB_02H-MOCK_00H	#NUM!		0	yes	8.08939	0.0415806
P23804	Mdm2	transformed mouse 3T3 cell double minute 2	17246	P23804_S161;P23804_T165	TB_02H-MOCK_00H	#NUM!		0	yes	7.03155	0.019073
P23804	Mdm2	transformed mouse 3T3 cell double minute 2	17246	P23804_S183	TB_02H-MOCK_00H	#NUM!		0	yes	8.0031	0.0223266
P23949	Zfp36l2	zinc finger protein 36, C3H type-like 2	12193	P23949_S127	TB_02H-MOCK_00H	-0.0444869	0.937626	0.981534	no	-0.0444869	0.937626
P23949	Zfp36l2	zinc finger protein 36, C3H type-like 2	12193	P23949_S416	TB_02H-MOCK_00H	0.207617	0.692335	0.917101	no	0.207617	0.692335
P23949	Zfp36l2	zinc finger protein 36, C3H type-like 2	12193	P23949_S57	TB_02H-MOCK_00H	0.715281	0.551299	0.861822	no	0.715281	0.551299
P23950	Zfp36l1	zinc finger protein 36, C3H type-like 1	12192	P23950_S334	TB_02H-MOCK_00H	#NUM!		0	yes	5.92146	0.0420909
P23950	Zfp36l1	zinc finger protein 36, C3H type-like 1	12192	P23950_S336	TB_02H-MOCK_00H	3.50718	0.312763	0.739629	no	3.50718	0.312763
P23950	Zfp36l1	zinc finger protein 36, C3H type-like 1	12192	P23950_S54	TB_02H-MOCK_00H	2.4921	0.0526803	0.328394	no	2.4921	0.0526803
P23950	Zfp36l1	zinc finger protein 36, C3H type-like 1	12192	P23950_S90	TB_02H-MOCK_00H	0.716758	0.397287	0.805493	no	0.716758	0.397287
P23950	Zfp36l1	zinc finger protein 36, C3H type-like 1	12192	P23950_S92	TB_02H-MOCK_00H	1.5835	0.00119507	0.0353862	no	1.5835	0.00119507
P24452	P24452			P24452_S341	TB_02H-MOCK_00H	0.13331	0.756369	0.940926	no	0.13331	0.756369
P24452	P24452			P24452_T330	TB_02H-MOCK_00H	#NUM!		0	yes	7.23758	0.0386136
P24604	Tec	tec protein tyrosine kinase	21682	P24604_T519	TB_02H-MOCK_00H	0.340588	0.266929	0.695795	no	0.340588	0.266929
P24610	Pax3	paired box 3	18505	P24610_S160	TB_02H-MOCK_00H	3.06792	0.000764798	0.0260592	no	3.06792	0.000764798
P24610	Pax3	paired box 3	18505	P24610_T2;P24610_T3	TB_02H-MOCK_00H	-0.567322	0.727658	0.929471	no	-0.567322	0.727658
P24668	M6pr	mannose-6-phosphate receptor, cation dependent	17113	P24668_S268	TB_02H-MOCK_00H	0.90042	0.0259172	0.225493	no	0.90042	0.0259172
P24788	Cdk11b	cyclin-dependent kinase 11B	12537	P24788_S578;P24788_T584	TB_02H-MOCK_00H	#NUM!		0	yes	6.28681	0.0474474
P25206	Mcm3	minichromosome maintenance complex component 3	17215	P25206_S672	TB_02H-MOCK_00H	-0.293926	0.379562	0.793828	no	-0.293926	0.379562
P25799	Nfkb1	nuclear factor of kappa light polypeptide gene enhancer in B cells 1, p105	18033	P25799_S896	TB_02H-MOCK_00H	0.0275857	0.903931	0.974454	no	0.0275857	0.903931
P25799	Nfkb1	nuclear factor of kappa light polypeptide gene enhancer in B cells 1, p105	18033	P25799_S940	TB_02H-MOCK_00H	0.506757	0.439324	0.816002	no	0.506757	0.439324
P25799	Nfkb1	nuclear factor of kappa light polypeptide gene enhancer in B cells 1, p105	18033	P25799_T894	TB_02H-MOCK_00H	0.344881	0.169655	0.580702	no	0.344881	0.169655
P25799	Nfkb1	nuclear factor of kappa light polypeptide gene enhancer in B cells 1, p105	18033	P25799_T942	TB_02H-MOCK_00H	1.01734	0.253356	0.684911	no	1.01734	0.253356
P25911	Lyn	LYN proto-oncogene, Src family tyrosine kinase	17096	P25911_T398	TB_02H-MOCK_00H	#NUM!		0	yes	5.6796	0.0204415
P25911	Lyn	LYN proto-oncogene, Src family tyrosine kinase	17096	P25911_Y397	TB_02H-MOCK_00H	1.27265	0.0302196	0.246072	no	1.27265	0.0302196
P26039	Tln1	talin 1	21894	P26039_S1201	TB_02H-MOCK_00H	1.8206	3.54079e-06	0.000698286	no	1.8206	3.54079e-06
P26039	Tln1	talin 1	21894	P26039_S1225	TB_02H-MOCK_00H	2.89719	4.23393e-05	0.0034879	no	2.89719	4.23393e-05
P26039	Tln1	talin 1	21894	P26039_S1227	TB_02H-MOCK_00H	#NUM!		0	yes	5.5077	0.0394069
P26039	Tln1	talin 1	21894	P26039_S1323	TB_02H-MOCK_00H	0.169593	0.723459	0.927007	no	0.169593	0.723459
P26039	Tln1	talin 1	21894	P26039_S1641	TB_02H-MOCK_00H	0.267724	0.313027	0.739716	no	0.267724	0.313027
P26039	Tln1	talin 1	21894	P26039_S2040	TB_02H-MOCK_00H	0.167496	0.528058	0.855727	no	0.167496	0.528058
P26041	Msn	moesin	17698	P26041_S384	TB_02H-MOCK_00H	1.54737	0.000428518	0.0173217	no	1.54737	0.000428518
P26041	Msn	moesin	17698	P26041_S576	TB_02H-MOCK_00H	0.767638	0.021562	0.203696	no	0.767638	0.021562
P26151	Fcgr1	Fc receptor, IgG, high affinity I	14129	P26151_S347	TB_02H-MOCK_00H	-0.0744588	0.849533	0.963588	no	-0.0744588	0.849533
P26151	Fcgr1	Fc receptor, IgG, high affinity I	14129	P26151_S378	TB_02H-MOCK_00H	-1.58625	0.468997	0.828286	no	-1.58625	0.468997
P26151	Fcgr1	Fc receptor, IgG, high affinity I	14129	P26151_S379	TB_02H-MOCK_00H	-0.29159	0.237131	0.666219	no	-0.29159	0.237131
P26151	Fcgr1	Fc receptor, IgG, high affinity I	14129	P26151_T367	TB_02H-MOCK_00H	-0.387641	0.015321	0.171687	no	-0.387641	0.015321
P26231	Ctnna1	catenin (cadherin associated protein), alpha 1	12385	P26231_S641	TB_02H-MOCK_00H	0.206107	0.318052	0.744829	no	0.206107	0.318052
P26231	Ctnna1	catenin (cadherin associated protein), alpha 1	12385	P26231_S655	TB_02H-MOCK_00H	-0.574159	0.334661	0.759324	no	-0.574159	0.334661
P26231	Ctnna1	catenin (cadherin associated protein), alpha 1	12385	P26231_S655;P26231_T658	TB_02H-MOCK_00H	-1.07886	0.0135264	0.160694	no	-1.07886	0.0135264
P26231	Ctnna1	catenin (cadherin associated protein), alpha 1	12385	P26231_T654	TB_02H-MOCK_00H	0.0574091	0.845168	0.961768	no	0.0574091	0.845168
P26231	Ctnna1	catenin (cadherin associated protein), alpha 1	12385	P26231_T654;P26231_T658	TB_02H-MOCK_00H	-0.0634453	0.945993	0.98359	no	-0.0634453	0.945993
P26323	Fli1	Friend leukemia integration 1	14247	P26323_S39	TB_02H-MOCK_00H	-0.581154	0.420345	0.810145	no	-0.581154	0.420345
P26323	Fli1	Friend leukemia integration 1	14247	P26323_S79	TB_02H-MOCK_00H	-0.198521	0.595948	0.88095	no	-0.198521	0.595948
P26350	Ptma	prothymosin alpha	19231	P26350_S2	TB_02H-MOCK_00H	-0.539073	0.225447	0.654509	no	-0.539073	0.225447
P26369	U2af2	U2 small nuclear ribonucleoprotein auxiliary factor (U2AF) 2	22185	P26369_S2	TB_02H-MOCK_00H	-0.00933568	0.976869	0.993346	no	-0.00933568	0.976869
P26369	U2af2	U2 small nuclear ribonucleoprotein auxiliary factor (U2AF) 2	22185	P26369_S79	TB_02H-MOCK_00H	0.866419	0.461292	0.82543	no	0.866419	0.461292
P26443	Glud1	glutamate dehydrogenase 1	14661	P26443_S128	TB_02H-MOCK_00H	-0.621599	0.145691	0.534477	no	-0.621599	0.145691
P26645	Marcks	myristoylated alanine rich protein kinase C substrate	17118	P26645_S138	TB_02H-MOCK_00H	1.9656	0.0240311	0.216612	no	1.9656	0.0240311
P26645	Marcks	myristoylated alanine rich protein kinase C substrate	17118	P26645_S138;P26645_T143	TB_02H-MOCK_00H	#NUM!		0	yes	7.29873	0.0414116
P26645	Marcks	myristoylated alanine rich protein kinase C substrate	17118	P26645_S140	TB_02H-MOCK_00H	#NUM!		0	yes	4.3974	0.0359449
P26645	Marcks	myristoylated alanine rich protein kinase C substrate	17118	P26645_S141	TB_02H-MOCK_00H	0.762237	0.199188	0.62084	no	0.762237	0.199188
P26645	Marcks	myristoylated alanine rich protein kinase C substrate	17118	P26645_S156	TB_02H-MOCK_00H	-0.0232354	0.970406	0.992336	no	-0.0232354	0.970406
P26645	Marcks	myristoylated alanine rich protein kinase C substrate	17118	P26645_S156;P26645_S163	TB_02H-MOCK_00H	0.51578	0.598261	0.882345	no	0.51578	0.598261
P26645	Marcks	myristoylated alanine rich protein kinase C substrate	17118	P26645_S163	TB_02H-MOCK_00H	-0.138055	0.800864	0.953187	no	-0.138055	0.800864
P26687	Twist1	twist basic helix-loop-helix transcription factor 1	22160	P26687_S6	TB_02H-MOCK_00H	-1.11345	0.137593	0.518203	no	-1.11345	0.137593
P27546	Map4	microtubule-associated protein 4	17758	P27546_S1046	TB_02H-MOCK_00H	1.30836	7.18915e-05	0.00514143	no	1.30836	7.18915e-05
P27546	Map4	microtubule-associated protein 4	17758	P27546_S475	TB_02H-MOCK_00H	1.10835	0.0114719	0.145819	no	1.10835	0.0114719
P27546	Map4	microtubule-associated protein 4	17758	P27546_S517	TB_02H-MOCK_00H	-0.0838227	0.878318	0.9699	no	-0.0838227	0.878318
P27546	Map4	microtubule-associated protein 4	17758	P27546_S667	TB_02H-MOCK_00H	0.101565	0.728406	0.929471	no	0.101565	0.728406
P27546	Map4	microtubule-associated protein 4	17758	P27546_S785	TB_02H-MOCK_00H	0.478275	0.292048	0.719796	no	0.478275	0.292048
P27546	Map4	microtubule-associated protein 4	17758	P27546_S901	TB_02H-MOCK_00H	0.482911	0.12581	0.501083	no	0.482911	0.12581
P27546	Map4	microtubule-associated protein 4	17758	P27546_S914	TB_02H-MOCK_00H	1.7472	0.135774	0.514644	no	1.7472	0.135774
P27546	Map4	microtubule-associated protein 4	17758	P27546_T503;P27546_S506	TB_02H-MOCK_00H	0.143258	0.888384	0.970719	no	0.143258	0.888384
P27546	Map4	microtubule-associated protein 4	17758	P27546_T657;P27546_S667	TB_02H-MOCK_00H	0.400106	0.197246	0.617448	no	0.400106	0.197246
P27546	Map4	microtubule-associated protein 4	17758	P27546_T759	TB_02H-MOCK_00H	0.566416	0.353828	0.773598	no	0.566416	0.353828
P27546	Map4	microtubule-associated protein 4	17758	P27546_T784	TB_02H-MOCK_00H	0.487219	0.140116	0.524671	no	0.487219	0.140116
P27546	Map4	microtubule-associated protein 4	17758	P27546_T847	TB_02H-MOCK_00H	0.533013	0.204156	0.627248	no	0.533013	0.204156
P27546	Map4	microtubule-associated protein 4	17758	P27546_T915	TB_02H-MOCK_00H	#NUM!		0	yes	5.01776	0.0161121
P27773	Pdia3	protein disulfide isomerase associated 3	14827	P27773_Y222;P27773_T223;P27773_T228;P27773_S229	TB_02H-MOCK_00H	0.406596	0.605791	0.884773	no	0.406596	0.605791
P27870	Vav1	vav 1 oncogene	22324	P27870_Y844	TB_02H-MOCK_00H	-0.350773	0.735841	0.931503	no	-0.350773	0.735841
P28028	Braf	Braf transforming gene	109880	P28028_S135	TB_02H-MOCK_00H	2.0579	0.0207443	0.200103	no	2.0579	0.0207443
P28028	Braf	Braf transforming gene	109880	P28028_S454	TB_02H-MOCK_00H	-0.274735	0.401605	0.805493	no	-0.274735	0.401605
P28028	Braf	Braf transforming gene	109880	P28028_S483	TB_02H-MOCK_00H	0.189792	0.832286	0.959836	no	0.189792	0.832286
P28028	Braf	Braf transforming gene	109880	P28028_S766	TB_02H-MOCK_00H	0.202882	0.584407	0.875367	no	0.202882	0.584407
P28033	Cebpb	CCAAT/enhancer binding protein (C/EBP), beta	12608	P28033_S171	TB_02H-MOCK_00H	#NUM!		0	yes	12.684	0.0400042
P28033	Cebpb	CCAAT/enhancer binding protein (C/EBP), beta	12608	P28033_S183;P28033_T188	TB_02H-MOCK_00H	2.66194	0.0229364	0.210536	no	2.66194	0.0229364
P28033	Cebpb	CCAAT/enhancer binding protein (C/EBP), beta	12608	P28033_S184	TB_02H-MOCK_00H	0.430373	0.834821	0.959836	no	0.430373	0.834821
P28033	Cebpb	CCAAT/enhancer binding protein (C/EBP), beta	12608	P28033_S184;P28033_T188	TB_02H-MOCK_00H	2.48527	1.43707e-05	0.00171046	no	2.48527	1.43707e-05
P28667	Marcksl1	MARCKS-like 1	17357	P28667_S104	TB_02H-MOCK_00H	0.559508	0.423484	0.810145	no	0.559508	0.423484
P28667	Marcksl1	MARCKS-like 1	17357	P28667_T148	TB_02H-MOCK_00H	1.38623	0.173242	0.585996	no	1.38623	0.173242
P28741	Kif3a	kinesin family member 3A	16568	P28741_S689	TB_02H-MOCK_00H	-1.13074	0.023018	0.210988	no	-1.13074	0.023018
P28867	Prkcd	protein kinase C, delta	18753	P28867_S299	TB_02H-MOCK_00H	0.540217	0.307188	0.734182	no	0.540217	0.307188
P28867	Prkcd	protein kinase C, delta	18753	P28867_S504	TB_02H-MOCK_00H	#NUM!		0	yes	6.28903	0.0294384
P28867	Prkcd	protein kinase C, delta	18753	P28867_S643	TB_02H-MOCK_00H	1.0787	0.0158001	0.17311	no	1.0787	0.0158001
P28867	Prkcd	protein kinase C, delta	18753	P28867_T505	TB_02H-MOCK_00H	-0.310497	0.232176	0.66214	no	-0.310497	0.232176
P29351	Ptpn6	protein tyrosine phosphatase, non-receptor type 6	15170	P29351_S10	TB_02H-MOCK_00H	0.110144	0.803609	0.953773	no	0.110144	0.803609
P29351	Ptpn6	protein tyrosine phosphatase, non-receptor type 6	15170	P29351_S557	TB_02H-MOCK_00H	3.30187	0.312329	0.739493	no	3.30187	0.312329
P29351	Ptpn6	protein tyrosine phosphatase, non-receptor type 6	15170	P29351_S557;P29351_Y564	TB_02H-MOCK_00H	#NUM!		0	yes	5.62981	0.0247629
P30204	Msr1	macrophage scavenger receptor 1	20288	P30204_S22	TB_02H-MOCK_00H	0.350134	0.614479	0.889337	no	0.350134	0.614479
P30204	Msr1	macrophage scavenger receptor 1	20288	P30204_S23	TB_02H-MOCK_00H	1.65111	0.226627	0.655376	no	1.65111	0.226627
P30204	Msr1	macrophage scavenger receptor 1	20288	P30204_S32	TB_02H-MOCK_00H	0.89643	0.127613	0.504255	no	0.89643	0.127613
P30204	Msr1	macrophage scavenger receptor 1	20288	P30204_S32;P30204_S36	TB_02H-MOCK_00H	-0.0999596	0.807123	0.95406	no	-0.0999596	0.807123
P30285	Cdk4	cyclin-dependent kinase 4	12567	P30285_S300	TB_02H-MOCK_00H	-1.32175	0.306972	0.734076	no	-1.32175	0.306972
P30415	Nktr	natural killer tumor recognition sequence	18087	P30415_S255	TB_02H-MOCK_00H	0.530698	0.0205163	0.199284	no	0.530698	0.0205163
P30415	Nktr	natural killer tumor recognition sequence	18087	P30415_S468	TB_02H-MOCK_00H	-0.529087	0.313822	0.740519	no	-0.529087	0.313822
P30993	C5ar1	complement component 5a receptor 1	12273	P30993_S325	TB_02H-MOCK_00H	0.68517	0.0916148	0.433621	no	0.68517	0.0916148
P30993	C5ar1	complement component 5a receptor 1	12273	P30993_S325;P30993_S328	TB_02H-MOCK_00H	0.0641285	0.777019	0.947328	no	0.0641285	0.777019
P30993	C5ar1	complement component 5a receptor 1	12273	P30993_S328	TB_02H-MOCK_00H	0.109633	0.83951	0.960216	no	0.109633	0.83951
P30993	C5ar1	complement component 5a receptor 1	12273	P30993_S333	TB_02H-MOCK_00H	-0.124138	0.783398	0.948216	no	-0.124138	0.783398
P30993	C5ar1	complement component 5a receptor 1	12273	P30993_S333;P30993_T335	TB_02H-MOCK_00H	-2.217	1.72938e-06	0.000388096	no	-2.217	1.72938e-06
P30993	C5ar1	complement component 5a receptor 1	12273	P30993_S339	TB_02H-MOCK_00H	-0.331073	0.418556	0.80935	no	-0.331073	0.418556
P30993	C5ar1	complement component 5a receptor 1	12273	P30993_S339;P30993_S344	TB_02H-MOCK_00H	-0.554347	0.688884	0.915698	no	-0.554347	0.688884
P30993	C5ar1	complement component 5a receptor 1	12273	P30993_S339;P30993_S348	TB_02H-MOCK_00H	1.13713	0.318806	0.745303	no	1.13713	0.318806
P30993	C5ar1	complement component 5a receptor 1	12273	P30993_S339;P30993_T343	TB_02H-MOCK_00H	0.350881	0.64332	0.901169	no	0.350881	0.64332
P30993	C5ar1	complement component 5a receptor 1	12273	P30993_S344	TB_02H-MOCK_00H	0.208419	0.842948	0.961384	no	0.208419	0.842948
P30993	C5ar1	complement component 5a receptor 1	12273	P30993_S348	TB_02H-MOCK_00H	1.09794	0.0169652	0.179527	no	1.09794	0.0169652
P30993	C5ar1	complement component 5a receptor 1	12273	P30993_T335;P30993_T343	TB_02H-MOCK_00H	0.818301	0.189652	0.606888	no	0.818301	0.189652
P30993	C5ar1	complement component 5a receptor 1	12273	P30993_T337;P30993_S348	TB_02H-MOCK_00H	0.870987	0.395783	0.805175	no	0.870987	0.395783
P30993	C5ar1	complement component 5a receptor 1	12273	P30993_T337;P30993_T340;P30993_T345	TB_02H-MOCK_00H	1.76482	0.0194212	0.194416	no	1.76482	0.0194212
P30993	C5ar1	complement component 5a receptor 1	12273	P30993_T337;P30993_T343	TB_02H-MOCK_00H	2.24035	0.104687	0.46347	no	2.24035	0.104687
P30993	C5ar1	complement component 5a receptor 1	12273	P30993_T343	TB_02H-MOCK_00H	1.58546	0.0039329	0.0775616	no	1.58546	0.0039329
P30999	Ctnnd1	catenin (cadherin associated protein), delta 1	12388	P30999_S268	TB_02H-MOCK_00H	-0.161348	0.605072	0.884305	no	-0.161348	0.605072
P30999	Ctnnd1	catenin (cadherin associated protein), delta 1	12388	P30999_S861;P30999_T869	TB_02H-MOCK_00H	#NUM!		0	yes	-5.14756	0.0184802
P31324	Prkar2b	protein kinase, cAMP dependent regulatory, type II beta	19088	P31324_S112	TB_02H-MOCK_00H	0.0471913	0.891922	0.972654	no	0.0471913	0.891922
P31324	Prkar2b	protein kinase, cAMP dependent regulatory, type II beta	19088	P31324_S83;P31324_S85	TB_02H-MOCK_00H	-2.29466	0.00179591	0.0457418	no	-2.29466	0.00179591
P31750	Akt1	thymoma viral proto-oncogene 1	11651	P31750_S122	TB_02H-MOCK_00H	-0.246343	0.528984	0.856055	no	-0.246343	0.528984
P31750	Akt1	thymoma viral proto-oncogene 1	11651	P31750_S122;P31750_S124;P31750_S129	TB_02H-MOCK_00H	#NUM!		0	yes	5.09697	0.0240463
P31750	Akt1	thymoma viral proto-oncogene 1	11651	P31750_S122;P31750_S126	TB_02H-MOCK_00H	-0.665983	0.130314	0.50632	no	-0.665983	0.130314
P31750	Akt1	thymoma viral proto-oncogene 1	11651	P31750_S122;P31750_S126;P31750_S129	TB_02H-MOCK_00H	-1.85982	0.044429	0.305972	no	-1.85982	0.044429
P31750	Akt1	thymoma viral proto-oncogene 1	11651	P31750_S122;P31750_S129	TB_02H-MOCK_00H	-0.296028	0.54229	0.860369	no	-0.296028	0.54229
P31750	Akt1	thymoma viral proto-oncogene 1	11651	P31750_S124	TB_02H-MOCK_00H	0.0120966	0.985572	0.995976	no	0.0120966	0.985572
P31750	Akt1	thymoma viral proto-oncogene 1	11651	P31750_S124;P31750_S126;P31750_S129	TB_02H-MOCK_00H	-1.06188	0.430574	0.81442	no	-1.06188	0.430574
P31750	Akt1	thymoma viral proto-oncogene 1	11651	P31750_S124;P31750_S129	TB_02H-MOCK_00H	0.0293335	0.973851	0.99284	no	0.0293335	0.973851
P31750	Akt1	thymoma viral proto-oncogene 1	11651	P31750_S126	TB_02H-MOCK_00H	0.0130746	0.986007	0.995976	no	0.0130746	0.986007
P31938	Map2k1	mitogen-activated protein kinase kinase 1	26395	P31938_S218	TB_02H-MOCK_00H	0.0656266	0.91026	0.976517	no	0.0656266	0.91026
P31938	Map2k1	mitogen-activated protein kinase kinase 1	26395	P31938_T292;P31938_S298;P31938_S304	TB_02H-MOCK_00H	-2.23097	0.097098	0.44501	no	-2.23097	0.097098
P33215	Nedd1	neural precursor cell expressed, developmentally down-regulated gene 1	17997	P33215_S379	TB_02H-MOCK_00H	#NUM!		0	yes	7.20123	0.0398273
P33611	Pola2	polymerase (DNA directed), alpha 2	18969	P33611_S126	TB_02H-MOCK_00H	-0.986625	0.00440996	0.0822349	no	-0.986625	0.00440996
P33611	Pola2	polymerase (DNA directed), alpha 2	18969	P33611_T127;P33611_T130	TB_02H-MOCK_00H	#NUM!		0	yes	4.12433	0.0160568
P35283	Rab12	RAB12, member RAS oncogene family	19328	P35283_S15	TB_02H-MOCK_00H	-0.18682	0.651917	0.903543	no	-0.18682	0.651917
P35283	Rab12	RAB12, member RAS oncogene family	19328	P35283_S15;P35283_S20	TB_02H-MOCK_00H	0.0586943	0.896363	0.972932	no	0.0586943	0.896363
P35283	Rab12	RAB12, member RAS oncogene family	19328	P35283_S20	TB_02H-MOCK_00H	0.229575	0.695431	0.918022	no	0.229575	0.695431
P35486	Pdha1	pyruvate dehydrogenase E1 alpha 1	18597	P35486_S232	TB_02H-MOCK_00H	-1.0115	0.0125685	0.153175	no	-1.0115	0.0125685
P35486	Pdha1	pyruvate dehydrogenase E1 alpha 1	18597	P35486_S293	TB_02H-MOCK_00H	0.128159	0.945828	0.98359	no	0.128159	0.945828
P35486	Pdha1	pyruvate dehydrogenase E1 alpha 1	18597	P35486_S293;P35486_S300	TB_02H-MOCK_00H	1.70045	0.583593	0.875322	no	1.70045	0.583593
P35486	Pdha1	pyruvate dehydrogenase E1 alpha 1	18597	P35486_S295;P35486_S300	TB_02H-MOCK_00H	0.697737	0.733528	0.930928	no	0.697737	0.733528
P35486	Pdha1	pyruvate dehydrogenase E1 alpha 1	18597	P35486_T231	TB_02H-MOCK_00H	-1.15989	0.0352481	0.26489	no	-1.15989	0.0352481
P35564	Canx	calnexin	12330	P35564_S553;P35564_S563	TB_02H-MOCK_00H	-0.421363	0.58443	0.875367	no	-0.421363	0.58443
P35564	Canx	calnexin	12330	P35564_S582	TB_02H-MOCK_00H	0.227581	0.692885	0.917322	no	0.227581	0.692885
P35601	Rfc1	replication factor C (activator 1) 1	19687	P35601_S107	TB_02H-MOCK_00H	-0.659307	0.00673777	0.106173	no	-0.659307	0.00673777
P35601	Rfc1	replication factor C (activator 1) 1	19687	P35601_S107;P35601_T109	TB_02H-MOCK_00H	-0.391154	0.687541	0.915686	no	-0.391154	0.687541
P35601	Rfc1	replication factor C (activator 1) 1	19687	P35601_S244	TB_02H-MOCK_00H	0.695676	0.0454369	0.308346	no	0.695676	0.0454369
P35601	Rfc1	replication factor C (activator 1) 1	19687	P35601_S266	TB_02H-MOCK_00H	0.0994705	0.899977	0.972932	no	0.0994705	0.899977
P35601	Rfc1	replication factor C (activator 1) 1	19687	P35601_S365	TB_02H-MOCK_00H	0.0630282	0.829977	0.959836	no	0.0630282	0.829977
P35601	Rfc1	replication factor C (activator 1) 1	19687	P35601_T160	TB_02H-MOCK_00H	-0.0569074	0.858011	0.965522	no	-0.0569074	0.858011
P35689	P35689			P35689_S384	TB_02H-MOCK_00H	0.19138	0.407645	0.808358	no	0.19138	0.407645
P35689	P35689			P35689_S571;P35689_T576	TB_02H-MOCK_00H	-0.22913	0.846108	0.961997	no	-0.22913	0.846108
P35689	P35689			P35689_T377	TB_02H-MOCK_00H	0.224506	0.442202	0.816643	no	0.224506	0.442202
P35831	Ptpn12	protein tyrosine phosphatase, non-receptor type 12	19248	P35831_S323	TB_02H-MOCK_00H	0.251053	0.537043	0.858449	no	0.251053	0.537043
P35831	Ptpn12	protein tyrosine phosphatase, non-receptor type 12	19248	P35831_S434	TB_02H-MOCK_00H	0.491362	0.443529	0.816678	no	0.491362	0.443529
P35831	Ptpn12	protein tyrosine phosphatase, non-receptor type 12	19248	P35831_T316	TB_02H-MOCK_00H	-0.414081	0.159174	0.563602	no	-0.414081	0.159174
P35831	Ptpn12	protein tyrosine phosphatase, non-receptor type 12	19248	P35831_T319	TB_02H-MOCK_00H	0.828226	0.096971	0.444741	no	0.828226	0.096971
P35831	Ptpn12	protein tyrosine phosphatase, non-receptor type 12	19248	P35831_T562	TB_02H-MOCK_00H	-0.362865	0.594966	0.88081	no	-0.362865	0.594966
P35991	Btk	Bruton agammaglobulinemia tyrosine kinase	12229	P35991_Y551	TB_02H-MOCK_00H	#NUM!		0	yes	4.99583	0.0451868
P37913	Lig1	ligase I, DNA, ATP-dependent	16881	P37913_S49	TB_02H-MOCK_00H	#NUM!		0	yes	10.3892	0.0150782
P37913	Lig1	ligase I, DNA, ATP-dependent	16881	P37913_S51	TB_02H-MOCK_00H	-0.269984	0.490608	0.836357	no	-0.269984	0.490608
P37913	Lig1	ligase I, DNA, ATP-dependent	16881	P37913_S65	TB_02H-MOCK_00H	#NUM!		0	yes	5.07368	0.0490574
P37913	Lig1	ligase I, DNA, ATP-dependent	16881	P37913_S906;P37913_S911	TB_02H-MOCK_00H	-1.95648	0.0692633	0.376314	no	-1.95648	0.0692633
P37913	Lig1	ligase I, DNA, ATP-dependent	16881	P37913_S907	TB_02H-MOCK_00H	0.455404	0.107201	0.468862	no	0.455404	0.107201
P37913	Lig1	ligase I, DNA, ATP-dependent	16881	P37913_S907;P37913_S911	TB_02H-MOCK_00H	-1.48435	0.103917	0.462265	no	-1.48435	0.103917
P37913	Lig1	ligase I, DNA, ATP-dependent	16881	P37913_T77	TB_02H-MOCK_00H	-1.44833	0.0744621	0.391437	no	-1.44833	0.0744621
P38585	Ttl	tubulin tyrosine ligase	69737	P38585_S151	TB_02H-MOCK_00H	#NUM!		0	yes	-6.16238	0.0191217
P39054	Dnm2	dynamin 2	13430	P39054_Y265	TB_02H-MOCK_00H	-0.610866	0.00730133	0.111559	no	-0.610866	0.00730133
P39429	Traf2	TNF receptor-associated factor 2	22030	P39429_S11	TB_02H-MOCK_00H	-0.0161622	0.94623	0.98359	no	-0.0161622	0.94623
P39689	Cdkn1a	cyclin-dependent kinase inhibitor 1A (P21)	12575	P39689_S78	TB_02H-MOCK_00H	0.507629	0.276058	0.704524	no	0.507629	0.276058
P40124	Cap1	CAP, adenylate cyclase-associated protein 1 (yeast)	12331	P40124_S242	TB_02H-MOCK_00H	0.895391	0.231045	0.660885	no	0.895391	0.231045
P40124	Cap1	CAP, adenylate cyclase-associated protein 1 (yeast)	12331	P40124_S244	TB_02H-MOCK_00H	1.23259	0.00946829	0.130414	no	1.23259	0.00946829
P40124	Cap1	CAP, adenylate cyclase-associated protein 1 (yeast)	12331	P40124_S245	TB_02H-MOCK_00H	#NUM!		0	yes	7.61212	0.0364649
P40124	Cap1	CAP, adenylate cyclase-associated protein 1 (yeast)	12331	P40124_T243	TB_02H-MOCK_00H	1.32263	0.437471	0.81573	no	1.32263	0.437471
P40201	Chd1	chromodomain helicase DNA binding protein 1	12648	P40201_S1674	TB_02H-MOCK_00H	0.157956	0.76819	0.943321	no	0.157956	0.76819
P40201	Chd1	chromodomain helicase DNA binding protein 1	12648	P40201_S1674;P40201_S1684	TB_02H-MOCK_00H	-0.315724	0.725952	0.928556	no	-0.315724	0.725952
P40201	Chd1	chromodomain helicase DNA binding protein 1	12648	P40201_S1678	TB_02H-MOCK_00H	0.032832	0.879712	0.9699	no	0.032832	0.879712
P40223	Csf3r	colony stimulating factor 3 receptor (granulocyte)	12986	P40223_S773	TB_02H-MOCK_00H	0.218527	0.576525	0.870197	no	0.218527	0.576525
P41136	Id2	inhibitor of DNA binding 2	15902	P41136_S14	TB_02H-MOCK_00H	#NUM!		0	yes	8.78923	0.0330362
P41183	Bcl6	B cell leukemia/lymphoma 6	12053	P41183_S338;P41183_S344	TB_02H-MOCK_00H	-0.306196	0.400469	0.805493	no	-0.306196	0.400469
P41183	Bcl6	B cell leukemia/lymphoma 6	12053	P41183_S396	TB_02H-MOCK_00H	0.032937	0.936514	0.981534	no	0.032937	0.936514
P42128	Foxk1	forkhead box K1	17425	P42128_S225;P42128_S229;P42128_S243	TB_02H-MOCK_00H	0.472695	0.423905	0.810145	no	0.472695	0.423905
P42128	Foxk1	forkhead box K1	17425	P42128_S225;P42128_T233	TB_02H-MOCK_00H	0.566642	0.207439	0.631225	no	0.566642	0.207439
P42128	Foxk1	forkhead box K1	17425	P42128_S225;P42128_T233;P42128_S243	TB_02H-MOCK_00H	-0.0856697	0.82241	0.959427	no	-0.0856697	0.82241
P42128	Foxk1	forkhead box K1	17425	P42128_S229;P42128_S243	TB_02H-MOCK_00H	0.72048	0.0025444	0.0587197	no	0.72048	0.0025444
P42128	Foxk1	forkhead box K1	17425	P42128_S229;P42128_S249	TB_02H-MOCK_00H	0.401176	0.209951	0.634631	no	0.401176	0.209951
P42128	Foxk1	forkhead box K1	17425	P42128_S399;P42128_S400	TB_02H-MOCK_00H	-0.495206	0.280418	0.707899	no	-0.495206	0.280418
P42128	Foxk1	forkhead box K1	17425	P42128_S402	TB_02H-MOCK_00H	0.42151	0.409161	0.808847	no	0.42151	0.409161
P42128	Foxk1	forkhead box K1	17425	P42128_S402;P42128_S406	TB_02H-MOCK_00H	2.03544	0.141438	0.526892	no	2.03544	0.141438
P42128	Foxk1	forkhead box K1	17425	P42128_S402;P42128_S406;P42128_S414	TB_02H-MOCK_00H	-0.0635616	0.956145	0.98646	no	-0.0635616	0.956145
P42128	Foxk1	forkhead box K1	17425	P42128_S402;P42128_S414	TB_02H-MOCK_00H	0.708895	0.0293448	0.241131	no	0.708895	0.0293448
P42128	Foxk1	forkhead box K1	17425	P42128_S402;P42128_T408;P42128_S414	TB_02H-MOCK_00H	-0.329345	0.761119	0.940926	no	-0.329345	0.761119
P42128	Foxk1	forkhead box K1	17425	P42128_S406;P42128_S414	TB_02H-MOCK_00H	-0.00295019	0.992319	0.996915	no	-0.00295019	0.992319
P42128	Foxk1	forkhead box K1	17425	P42128_S406;P42128_T408;P42128_S414	TB_02H-MOCK_00H	-0.950876	0.135584	0.514644	no	-0.950876	0.135584
P42128	Foxk1	forkhead box K1	17425	P42128_S417;P42128_S418;P42128_S427	TB_02H-MOCK_00H	-0.942844	0.683967	0.914121	no	-0.942844	0.683967
P42128	Foxk1	forkhead box K1	17425	P42128_S431	TB_02H-MOCK_00H	0.931569	0.000370151	0.0152465	no	0.931569	0.000370151
P42128	Foxk1	forkhead box K1	17425	P42128_T233;P42128_S243	TB_02H-MOCK_00H	#NUM!		0	yes	7.27462	0.049355
P42128	Foxk1	forkhead box K1	17425	P42128_T408;P42128_S414	TB_02H-MOCK_00H	0.292975	0.639676	0.901169	no	0.292975	0.639676
P42128	Foxk1	forkhead box K1	17425	P42128_T422;P42128_S427	TB_02H-MOCK_00H	-0.0812913	0.780808	0.948177	no	-0.0812913	0.780808
P42128	Foxk1	forkhead box K1	17425	P42128_T422;P42128_S427;P42128_S431	TB_02H-MOCK_00H	-0.425207	0.238341	0.6683	no	-0.425207	0.238341
P42128	Foxk1	forkhead box K1	17425	P42128_T422;P42128_S431	TB_02H-MOCK_00H	0.465962	0.677162	0.91037	no	0.465962	0.677162
P42208	Sept2	septin 2	18000	P42208_S218	TB_02H-MOCK_00H	-0.429907	0.669625	0.910071	no	-0.429907	0.669625
P42225	P42225			P42225_S727	TB_02H-MOCK_00H	1.12182	0.140283	0.524994	no	1.12182	0.140283
P42225	P42225			P42225_T719	TB_02H-MOCK_00H	#NUM!		0	yes	5.62249	0.0380904
P42227	Stat3	signal transducer and activator of transcription 3	20848	P42227_S727	TB_02H-MOCK_00H	1.35555	0.00157711	0.042017	no	1.35555	0.00157711
P42227	Stat3	signal transducer and activator of transcription 3	20848	P42227_Y705	TB_02H-MOCK_00H	#NUM!		0	yes	6.00279	0.0388547
P42230	Stat5a	signal transducer and activator of transcription 5A	20850	P42230_Y694	TB_02H-MOCK_00H	#NUM!		0	yes	8.51787	0.0415482
P42859	P42859			P42859_S1853	TB_02H-MOCK_00H	2.0004	1.21338e-06	0.000333923	no	2.0004	1.21338e-06
P42859	P42859			P42859_S396;P42859_S398	TB_02H-MOCK_00H	0.0118951	0.970531	0.992336	no	0.0118951	0.970531
P42859	P42859			P42859_S396;P42859_S408	TB_02H-MOCK_00H	0.00711664	0.97653	0.993346	no	0.00711664	0.97653
P42859	P42859			P42859_S396;P42859_S409	TB_02H-MOCK_00H	0.997251	0.131783	0.50929	no	0.997251	0.131783
P42859	P42859			P42859_S396;P42859_S411	TB_02H-MOCK_00H	2.47652	0.0238234	0.215263	no	2.47652	0.0238234
P42859	P42859			P42859_S398;P42859_S408	TB_02H-MOCK_00H	0.202178	0.54098	0.860369	no	0.202178	0.54098
P42859	P42859			P42859_S398;P42859_S409	TB_02H-MOCK_00H	-0.344515	0.400771	0.805493	no	-0.344515	0.400771
P42859	P42859			P42859_S398;P42859_S411	TB_02H-MOCK_00H	0.321277	0.599862	0.882919	no	0.321277	0.599862
P43274	Hist1h1e	histone cluster 1, H1e	50709	P43274_S2	TB_02H-MOCK_00H	-0.0696011	0.761114	0.940926	no	-0.0696011	0.761114
P43274	Hist1h1e	histone cluster 1, H1e	50709	P43274_S2;P43274_T4	TB_02H-MOCK_00H	-0.838842	0.0499503	0.317945	no	-0.838842	0.0499503
P43274	Hist1h1e	histone cluster 1, H1e	50709	P43274_S36	TB_02H-MOCK_00H	0.127311	0.663354	0.908483	no	0.127311	0.663354
P43274	Hist1h1e	histone cluster 1, H1e	50709	P43274_T18	TB_02H-MOCK_00H	0.87423	0.135623	0.514644	no	0.87423	0.135623
P43274	Hist1h1e	histone cluster 1, H1e	50709	P43274_T35	TB_02H-MOCK_00H	0.174906	0.651386	0.903543	no	0.174906	0.651386
P43275	Hist1h1a	histone cluster 1, H1a	80838	P43275_S12	TB_02H-MOCK_00H	0.245384	0.586979	0.876763	no	0.245384	0.586979
P43275	Hist1h1a	histone cluster 1, H1a	80838	P43275_S2	TB_02H-MOCK_00H	-0.0829017	0.655627	0.904603	no	-0.0829017	0.655627
P43275	Hist1h1a	histone cluster 1, H1a	80838	P43275_T13	TB_02H-MOCK_00H	-0.289305	0.462036	0.825445	no	-0.289305	0.462036
P43276	Hist1h1b	histone cluster 1, H1b	56702	P43276_S18	TB_02H-MOCK_00H	0.292568	0.490007	0.836357	no	0.292568	0.490007
P43276	Hist1h1b	histone cluster 1, H1b	56702	P43276_S2	TB_02H-MOCK_00H	0.137178	0.653818	0.904081	no	0.137178	0.653818
P43276	Hist1h1b	histone cluster 1, H1b	56702	P43276_S2;P43276_S18	TB_02H-MOCK_00H	0.150848	0.799302	0.953003	no	0.150848	0.799302
P43276	Hist1h1b	histone cluster 1, H1b	56702	P43276_S2;P43276_T4	TB_02H-MOCK_00H	-0.619536	0.439618	0.816002	no	-0.619536	0.439618
P43276	Hist1h1b	histone cluster 1, H1b	56702	P43276_T4	TB_02H-MOCK_00H	0.275543	0.39967	0.805493	no	0.275543	0.39967
P43277	Hist1h1d	histone cluster 1, H1d	14957	P43277_S2	TB_02H-MOCK_00H	-0.244068	0.332385	0.757908	no	-0.244068	0.332385
P43277	Hist1h1d	histone cluster 1, H1d	14957	P43277_S2;P43277_T4	TB_02H-MOCK_00H	0.174845	0.793853	0.951131	no	0.174845	0.793853
P43277	Hist1h1d	histone cluster 1, H1d	14957	P43277_T18	TB_02H-MOCK_00H	0.598941	0.215756	0.641159	no	0.598941	0.215756
P43277	Hist1h1d	histone cluster 1, H1d	14957	P43277_T4	TB_02H-MOCK_00H	0.194574	0.644759	0.901784	no	0.194574	0.644759
P43346	Dck	deoxycytidine kinase	13178	P43346_S11	TB_02H-MOCK_00H	0.431076	0.547051	0.860369	no	0.431076	0.547051
P43346	Dck	deoxycytidine kinase	13178	P43346_S11;P43346_S13	TB_02H-MOCK_00H	0.772314	0.167062	0.577758	no	0.772314	0.167062
P43346	Dck	deoxycytidine kinase	13178	P43346_S11;P43346_S15	TB_02H-MOCK_00H	-0.363795	0.364824	0.78273	no	-0.363795	0.364824
P43346	Dck	deoxycytidine kinase	13178	P43346_S11;P43346_T14	TB_02H-MOCK_00H	1.10165	0.601812	0.883476	no	1.10165	0.601812
P43346	Dck	deoxycytidine kinase	13178	P43346_T3;P43346_S11	TB_02H-MOCK_00H	0.168524	0.665816	0.908966	no	0.168524	0.665816
P45591	Cfl2	cofilin 2, muscle	12632	P45591_S3	TB_02H-MOCK_00H	0.703092	0.0124137	0.152959	no	0.703092	0.0124137
P46062	P46062			P46062_S51	TB_02H-MOCK_00H	-0.0619815	0.805729	0.953773	no	-0.0619815	0.805729
P46062	P46062			P46062_S53	TB_02H-MOCK_00H	0.633143	0.412624	0.808847	no	0.633143	0.412624
P46062	P46062			P46062_S53;P46062_S65	TB_02H-MOCK_00H	0.64004	0.016592	0.176728	no	0.64004	0.016592
P46062	P46062			P46062_S72	TB_02H-MOCK_00H	1.99226	0.25875	0.689576	no	1.99226	0.25875
P46062	P46062			P46062_S903	TB_02H-MOCK_00H	0.0782202	0.776149	0.946622	no	0.0782202	0.776149
P46062	P46062			P46062_S903;P46062_S907	TB_02H-MOCK_00H	0.655754	0.00599199	0.0972465	no	0.655754	0.00599199
P46062	P46062			P46062_S907	TB_02H-MOCK_00H	0.21679	0.453657	0.823542	no	0.21679	0.453657
P46414	Cdkn1b	cyclin-dependent kinase inhibitor 1B	12576	P46414_S10	TB_02H-MOCK_00H	0.331222	0.483439	0.832334	no	0.331222	0.483439
P46460	Nsf	N-ethylmaleimide sensitive fusion protein	18195	P46460_S207	TB_02H-MOCK_00H	-0.809014	0.117528	0.487492	no	-0.809014	0.117528
P46664	Adss	adenylosuccinate synthetase, non muscle	11566	P46664_S2	TB_02H-MOCK_00H	-0.225909	0.350976	0.771412	no	-0.225909	0.350976
P47713	Pla2g4a	phospholipase A2, group IVA (cytosolic, calcium-dependent)	18783	P47713_S434	TB_02H-MOCK_00H	-0.96198	0.119406	0.49152	no	-0.96198	0.119406
P47713	Pla2g4a	phospholipase A2, group IVA (cytosolic, calcium-dependent)	18783	P47713_S437	TB_02H-MOCK_00H	0.0339835	0.934086	0.981534	no	0.0339835	0.934086
P47713	Pla2g4a	phospholipase A2, group IVA (cytosolic, calcium-dependent)	18783	P47713_S723	TB_02H-MOCK_00H	-0.0612771	0.921029	0.978746	no	-0.0612771	0.921029
P47713	Pla2g4a	phospholipase A2, group IVA (cytosolic, calcium-dependent)	18783	P47713_S726	TB_02H-MOCK_00H	-1.1494	0.0083594	0.120896	no	-1.1494	0.0083594
P47713	Pla2g4a	phospholipase A2, group IVA (cytosolic, calcium-dependent)	18783	P47713_S728	TB_02H-MOCK_00H	-1.62335	2.7866e-05	0.00262829	no	-1.62335	2.7866e-05
P47753	P47753			P47753_S9	TB_02H-MOCK_00H	-0.15591	0.608983	0.886637	no	-0.15591	0.608983
P47754	Capza2	capping protein (actin filament) muscle Z-line, alpha 2	12343	P47754_S9	TB_02H-MOCK_00H	0.128443	0.474781	0.828419	no	0.128443	0.474781
P47757	Capzb	capping protein (actin filament) muscle Z-line, beta	12345	P47757_S2	TB_02H-MOCK_00H	0.25082	0.175377	0.589542	no	0.25082	0.175377
P47757	Capzb	capping protein (actin filament) muscle Z-line, beta	12345	P47757_S263	TB_02H-MOCK_00H	0.297775	0.236279	0.665672	no	0.297775	0.236279
P47809	Map2k4	mitogen-activated protein kinase kinase 4	26398	P47809_S78	TB_02H-MOCK_00H	0.340529	0.573594	0.869746	no	0.340529	0.573594
P47809	Map2k4	mitogen-activated protein kinase kinase 4	26398	P47809_T76	TB_02H-MOCK_00H	0.131091	0.918491	0.977836	no	0.131091	0.918491
P47811	Mapk14	mitogen-activated protein kinase 14	26416	P47811_S2	TB_02H-MOCK_00H	-0.180071	0.659134	0.905561	no	-0.180071	0.659134
P47811	Mapk14	mitogen-activated protein kinase 14	26416	P47811_T180	TB_02H-MOCK_00H	-0.746707	0.495477	0.838638	no	-0.746707	0.495477
P47811	Mapk14	mitogen-activated protein kinase 14	26416	P47811_T180;P47811_Y182	TB_02H-MOCK_00H	-0.278952	0.79723	0.952093	no	-0.278952	0.79723
P47811	Mapk14	mitogen-activated protein kinase 14	26416	P47811_Y182	TB_02H-MOCK_00H	#NUM!		0	yes	8.75956	0.0375668
P47856	Gfpt1	glutamine fructose-6-phosphate transaminase 1	14583	P47856_S251	TB_02H-MOCK_00H	-0.908306	0.00232135	0.0548701	no	-0.908306	0.00232135
P47856	Gfpt1	glutamine fructose-6-phosphate transaminase 1	14583	P47856_S259	TB_02H-MOCK_00H	-0.286276	0.376594	0.792886	no	-0.286276	0.376594
P47911	Rpl6	ribosomal protein L6	19988	P47911_S21	TB_02H-MOCK_00H	0.103589	0.866931	0.967916	no	0.103589	0.866931
P47915	Rpl29	ribosomal protein L29	19944	P47915_S138	TB_02H-MOCK_00H	0.259928	0.447058	0.818882	no	0.259928	0.447058
P47930	Fosl2	fos-like antigen 2	14284	P47930_S200	TB_02H-MOCK_00H	0.922026	0.143298	0.53041	no	0.922026	0.143298
P47930	Fosl2	fos-like antigen 2	14284	P47930_S308;P47930_S320	TB_02H-MOCK_00H	#NUM!		0	yes	6.33874	0.0449932
P47930	Fosl2	fos-like antigen 2	14284	P47930_S309	TB_02H-MOCK_00H	#NUM!		0	yes	8.70928	0.0398054
P47955	Rplp1	ribosomal protein, large, P1	56040	P47955_S101	TB_02H-MOCK_00H	0.384405	0.345755	0.768923	no	0.384405	0.345755
P47955	Rplp1	ribosomal protein, large, P1	56040	P47955_S104	TB_02H-MOCK_00H	#NUM!		0	yes	-6.58994	0.0170476
P47963	Rpl13	ribosomal protein L13	270106	P47963_S106	TB_02H-MOCK_00H	0.609442	0.0154261	0.171687	no	0.609442	0.0154261
P48025	Syk	spleen tyrosine kinase	20963	P48025_S270	TB_02H-MOCK_00H	-0.467153	0.405449	0.80704	no	-0.467153	0.405449
P48025	Syk	spleen tyrosine kinase	20963	P48025_S279	TB_02H-MOCK_00H	1.26308	0.191439	0.609532	no	1.26308	0.191439
P48025	Syk	spleen tyrosine kinase	20963	P48025_S291	TB_02H-MOCK_00H	#NUM!		0	yes	4.7417	0.0370739
P48193	Epb41	erythrocyte membrane protein band 4.1	269587	P48193_S703	TB_02H-MOCK_00H	#NUM!		0	yes	6.74425	0.0419917
P48193	Epb41	erythrocyte membrane protein band 4.1	269587	P48193_S706	TB_02H-MOCK_00H	1.00586	0.0459533	0.310043	no	1.00586	0.0459533
P48193	Epb41	erythrocyte membrane protein band 4.1	269587	P48193_S856	TB_02H-MOCK_00H	#NUM!		0	yes	8.46254	0.0161027
P48193	Epb41	erythrocyte membrane protein band 4.1	269587	P48193_T560	TB_02H-MOCK_00H	-0.120124	0.736707	0.931585	no	-0.120124	0.736707
P48377	Rfx1	regulatory factor X, 1 (influences HLA class II expression)	19724	P48377_T125	TB_02H-MOCK_00H	-1.73875	5.23422e-05	0.00405527	no	-1.73875	5.23422e-05
P48678	Lmna	lamin A	16905	P48678_S12	TB_02H-MOCK_00H	2.30187	2.56475e-11	8.34569e-08	no	2.30187	2.56475e-11
P48678	Lmna	lamin A	16905	P48678_S17	TB_02H-MOCK_00H	1.08099	1.60969e-06	0.000383076	no	1.08099	1.60969e-06
P48678	Lmna	lamin A	16905	P48678_S22	TB_02H-MOCK_00H	0.78041	0.00437542	0.0821036	no	0.78041	0.00437542
P48678	Lmna	lamin A	16905	P48678_S390	TB_02H-MOCK_00H	0.87624	0.0346078	0.263457	no	0.87624	0.0346078
P48678	Lmna	lamin A	16905	P48678_S390;P48678_S392	TB_02H-MOCK_00H	-1.71048	0.0322647	0.254589	no	-1.71048	0.0322647
P48678	Lmna	lamin A	16905	P48678_S392	TB_02H-MOCK_00H	0.71306	0.316089	0.743175	no	0.71306	0.316089
P48678	Lmna	lamin A	16905	P48678_S403	TB_02H-MOCK_00H	-1.46422	0.263579	0.695795	no	-1.46422	0.263579
P48678	Lmna	lamin A	16905	P48678_S403;P48678_S404	TB_02H-MOCK_00H	-0.408082	0.712911	0.922887	no	-0.408082	0.712911
P48678	Lmna	lamin A	16905	P48678_S403;P48678_S406	TB_02H-MOCK_00H	-0.0807014	0.938204	0.981534	no	-0.0807014	0.938204
P48678	Lmna	lamin A	16905	P48678_S404	TB_02H-MOCK_00H	#NUM!		0	yes	6.63639	0.0168906
P48678	Lmna	lamin A	16905	P48678_S404;P48678_S406	TB_02H-MOCK_00H	0.0439312	0.957766	0.98735	no	0.0439312	0.957766
P48678	Lmna	lamin A	16905	P48678_S404;P48678_S407	TB_02H-MOCK_00H	1.31296	0.370768	0.789311	no	1.31296	0.370768
P48678	Lmna	lamin A	16905	P48678_S404;P48678_S409	TB_02H-MOCK_00H	0.925762	0.47813	0.828543	no	0.925762	0.47813
P48678	Lmna	lamin A	16905	P48678_S404;P48678_S414	TB_02H-MOCK_00H	0.0238163	0.982002	0.995759	no	0.0238163	0.982002
P48678	Lmna	lamin A	16905	P48678_S406	TB_02H-MOCK_00H	0.473401	0.484059	0.832961	no	0.473401	0.484059
P48678	Lmna	lamin A	16905	P48678_S570	TB_02H-MOCK_00H	-0.124391	0.903705	0.974454	no	-0.124391	0.903705
P48678	Lmna	lamin A	16905	P48678_S573	TB_02H-MOCK_00H	1.24704	0.113202	0.479569	no	1.24704	0.113202
P48678	Lmna	lamin A	16905	P48678_S575	TB_02H-MOCK_00H	0.91035	0.259282	0.690145	no	0.91035	0.259282
P48678	Lmna	lamin A	16905	P48678_S633	TB_02H-MOCK_00H	-0.174627	0.64389	0.901169	no	-0.174627	0.64389
P48678	Lmna	lamin A	16905	P48678_S652	TB_02H-MOCK_00H	#NUM!		0	yes	5.04061	0.0312265
P48678	Lmna	lamin A	16905	P48678_T19	TB_02H-MOCK_00H	1.40771	0.0453436	0.308203	no	1.40771	0.0453436
P48678	Lmna	lamin A	16905	P48678_T3	TB_02H-MOCK_00H	0.250034	0.702881	0.92008	no	0.250034	0.702881
P49138	Mapkapk2	MAP kinase-activated protein kinase 2	17164	P49138_S3	TB_02H-MOCK_00H	0.078842	0.91564	0.977117	no	0.078842	0.91564
P49138	Mapkapk2	MAP kinase-activated protein kinase 2	17164	P49138_S3;P49138_S16	TB_02H-MOCK_00H	-0.859258	0.162275	0.569932	no	-0.859258	0.162275
P49138	Mapkapk2	MAP kinase-activated protein kinase 2	17164	P49138_S3;P49138_S5;P49138_T9	TB_02H-MOCK_00H	-1.05386	0.386661	0.798327	no	-1.05386	0.386661
P49138	Mapkapk2	MAP kinase-activated protein kinase 2	17164	P49138_S3;P49138_T9;P49138_S16	TB_02H-MOCK_00H	#NUM!		0	yes	-7.25319	0.0141523
P49138	Mapkapk2	MAP kinase-activated protein kinase 2	17164	P49138_S5;P49138_T9;P49138_S16	TB_02H-MOCK_00H	-1.68113	0.0267477	0.229045	no	-1.68113	0.0267477
P49138	Mapkapk2	MAP kinase-activated protein kinase 2	17164	P49138_T9	TB_02H-MOCK_00H	#NUM!		0	yes	-6.30048	0.0196416
P49138	Mapkapk2	MAP kinase-activated protein kinase 2	17164	P49138_T9;P49138_S16	TB_02H-MOCK_00H	0.696206	0.551553	0.861822	no	0.696206	0.551553
P49312	Hnrnpa1	heterogeneous nuclear ribonucleoprotein A1	15382	P49312_S2	TB_02H-MOCK_00H	0.616283	0.323106	0.749385	no	0.616283	0.323106
P49312	Hnrnpa1	heterogeneous nuclear ribonucleoprotein A1	15382	P49312_S2;P49312_S4	TB_02H-MOCK_00H	-0.516373	0.124664	0.498655	no	-0.516373	0.124664
P49312	Hnrnpa1	heterogeneous nuclear ribonucleoprotein A1	15382	P49312_S2;P49312_S6	TB_02H-MOCK_00H	-0.233834	0.825889	0.959836	no	-0.233834	0.825889
P49312	Hnrnpa1	heterogeneous nuclear ribonucleoprotein A1	15382	P49312_S310	TB_02H-MOCK_00H	-1.60165	0.225976	0.654509	no	-1.60165	0.225976
P49312	Hnrnpa1	heterogeneous nuclear ribonucleoprotein A1	15382	P49312_S311	TB_02H-MOCK_00H	-0.788853	0.414784	0.809178	no	-0.788853	0.414784
P49312	Hnrnpa1	heterogeneous nuclear ribonucleoprotein A1	15382	P49312_S4	TB_02H-MOCK_00H	-0.129905	0.895617	0.972932	no	-0.129905	0.895617
P49312	Hnrnpa1	heterogeneous nuclear ribonucleoprotein A1	15382	P49312_S4;P49312_S6	TB_02H-MOCK_00H	0.0122649	0.98534	0.995976	no	0.0122649	0.98534
P49312	Hnrnpa1	heterogeneous nuclear ribonucleoprotein A1	15382	P49312_S6	TB_02H-MOCK_00H	0.613463	0.205832	0.628603	no	0.613463	0.205832
P49452	Cenpc1	centromere protein C1	12617	P49452_S156	TB_02H-MOCK_00H	0.0804353	0.822848	0.959427	no	0.0804353	0.822848
P49452	Cenpc1	centromere protein C1	12617	P49452_S697	TB_02H-MOCK_00H	-0.593235	0.0237349	0.215135	no	-0.593235	0.0237349
P49452	Cenpc1	centromere protein C1	12617	P49452_S699	TB_02H-MOCK_00H	0.351007	0.0676459	0.37264	no	0.351007	0.0676459
P49586	Pcyt1a	phosphate cytidylyltransferase 1, choline, alpha isoform	13026	P49586_S315;P49586_S319;P49586_S321	TB_02H-MOCK_00H	-0.212893	0.749022	0.93635	no	-0.212893	0.749022
P49586	Pcyt1a	phosphate cytidylyltransferase 1, choline, alpha isoform	13026	P49586_S315;P49586_S319;P49586_S323;P49586_S329	TB_02H-MOCK_00H	-2.35328	0.110561	0.475678	no	-2.35328	0.110561
P49586	Pcyt1a	phosphate cytidylyltransferase 1, choline, alpha isoform	13026	P49586_S315;P49586_S321	TB_02H-MOCK_00H	-0.157417	0.736908	0.931585	no	-0.157417	0.736908
P49586	Pcyt1a	phosphate cytidylyltransferase 1, choline, alpha isoform	13026	P49586_S315;P49586_S321;P49586_S322	TB_02H-MOCK_00H	-0.656486	0.205987	0.628783	no	-0.656486	0.205987
P49586	Pcyt1a	phosphate cytidylyltransferase 1, choline, alpha isoform	13026	P49586_S315;P49586_S321;P49586_S322;P49586_S323	TB_02H-MOCK_00H	-1.13976	0.278286	0.706882	no	-1.13976	0.278286
P49586	Pcyt1a	phosphate cytidylyltransferase 1, choline, alpha isoform	13026	P49586_S315;P49586_S321;P49586_S323	TB_02H-MOCK_00H	-0.775379	0.587669	0.876989	no	-0.775379	0.587669
P49586	Pcyt1a	phosphate cytidylyltransferase 1, choline, alpha isoform	13026	P49586_S315;P49586_S323;P49586_S331	TB_02H-MOCK_00H	0.194465	0.716456	0.924221	no	0.194465	0.716456
P49586	Pcyt1a	phosphate cytidylyltransferase 1, choline, alpha isoform	13026	P49586_S319;P49586_S321	TB_02H-MOCK_00H	0.706271	0.405025	0.80704	no	0.706271	0.405025
P49586	Pcyt1a	phosphate cytidylyltransferase 1, choline, alpha isoform	13026	P49586_S319;P49586_S321;P49586_S322;P49586_T325	TB_02H-MOCK_00H	0.971844	0.48867	0.836357	no	0.971844	0.48867
P49586	Pcyt1a	phosphate cytidylyltransferase 1, choline, alpha isoform	13026	P49586_S319;P49586_S321;P49586_S323	TB_02H-MOCK_00H	-0.773683	0.31361	0.740519	no	-0.773683	0.31361
P49586	Pcyt1a	phosphate cytidylyltransferase 1, choline, alpha isoform	13026	P49586_S319;P49586_S321;P49586_S323;P49586_T325	TB_02H-MOCK_00H	#NUM!		0	yes	-5.49851	0.0206835
P49586	Pcyt1a	phosphate cytidylyltransferase 1, choline, alpha isoform	13026	P49586_S319;P49586_S321;P49586_S331	TB_02H-MOCK_00H	1.23106	0.509822	0.845791	no	1.23106	0.509822
P49586	Pcyt1a	phosphate cytidylyltransferase 1, choline, alpha isoform	13026	P49586_S339	TB_02H-MOCK_00H	#NUM!		0	yes	8.97244	0.0466074
P49586	Pcyt1a	phosphate cytidylyltransferase 1, choline, alpha isoform	13026	P49586_S343	TB_02H-MOCK_00H	-0.0467565	0.929164	0.980833	no	-0.0467565	0.929164
P49586	Pcyt1a	phosphate cytidylyltransferase 1, choline, alpha isoform	13026	P49586_S343;P49586_S346	TB_02H-MOCK_00H	#NUM!		0	yes	-5.18109	0.0328683
P49586	Pcyt1a	phosphate cytidylyltransferase 1, choline, alpha isoform	13026	P49586_S343;P49586_S347	TB_02H-MOCK_00H	-0.752746	0.175091	0.589002	no	-0.752746	0.175091
P49586	Pcyt1a	phosphate cytidylyltransferase 1, choline, alpha isoform	13026	P49586_S347	TB_02H-MOCK_00H	-0.172032	0.742002	0.933672	no	-0.172032	0.742002
P49586	Pcyt1a	phosphate cytidylyltransferase 1, choline, alpha isoform	13026	P49586_S362	TB_02H-MOCK_00H	0.196948	0.51702	0.848617	no	0.196948	0.51702
P49586	Pcyt1a	phosphate cytidylyltransferase 1, choline, alpha isoform	13026	P49586_T325;P49586_S329	TB_02H-MOCK_00H	1.28177	0.266217	0.695795	no	1.28177	0.266217
P49586	Pcyt1a	phosphate cytidylyltransferase 1, choline, alpha isoform	13026	P49586_T342	TB_02H-MOCK_00H	-0.943246	0.108361	0.471716	no	-0.943246	0.108361
P49710	Hcls1	hematopoietic cell specific Lyn substrate 1	15163	P49710_S327	TB_02H-MOCK_00H	-0.65784	0.256339	0.686808	no	-0.65784	0.256339
P49717	Mcm4	minichromosome maintenance complex component 4	17217	P49717_S2	TB_02H-MOCK_00H	-1.76125	9.15751e-05	0.00608133	no	-1.76125	9.15751e-05
P49717	Mcm4	minichromosome maintenance complex component 4	17217	P49717_S29	TB_02H-MOCK_00H	#NUM!		0	yes	5.6482	0.0476509
P49717	Mcm4	minichromosome maintenance complex component 4	17217	P49717_T777;P49717_T787;P49717_S790;P49717_T792	TB_02H-MOCK_00H	-1.47788	0.048622	0.314292	no	-1.47788	0.048622
P49769	Psen1	presenilin 1	19164	P49769_S57	TB_02H-MOCK_00H	1.19094	0.0785664	0.400961	no	1.19094	0.0785664
P50580	Pa2g4	proliferation-associated 2G4	18813	P50580_S2	TB_02H-MOCK_00H	0.0659762	0.805964	0.953773	no	0.0659762	0.805964
P50580	Pa2g4	proliferation-associated 2G4	18813	P50580_S2;P50580_T11	TB_02H-MOCK_00H	-0.118205	0.781183	0.948177	no	-0.118205	0.781183
P51125	Cast	calpastatin	12380	P51125_S11	TB_02H-MOCK_00H	1.35551	0.0650495	0.365581	no	1.35551	0.0650495
P51125	Cast	calpastatin	12380	P51125_S15	TB_02H-MOCK_00H	0.460357	0.481763	0.830987	no	0.460357	0.481763
P51125	Cast	calpastatin	12380	P51125_S2;P51125_S11	TB_02H-MOCK_00H	-0.0907356	0.823356	0.959427	no	-0.0907356	0.823356
P51125	Cast	calpastatin	12380	P51125_S303;P51125_T321	TB_02H-MOCK_00H	#NUM!		0	yes	6.83936	0.0260292
P51125	Cast	calpastatin	12380	P51125_S473	TB_02H-MOCK_00H	#NUM!		0	yes	-5.76706	0.0273244
P51125	Cast	calpastatin	12380	P51125_S477	TB_02H-MOCK_00H	-0.124527	0.899481	0.972932	no	-0.124527	0.899481
P51125	Cast	calpastatin	12380	P51125_S74	TB_02H-MOCK_00H	1.02404	0.2193	0.646136	no	1.02404	0.2193
P51125	Cast	calpastatin	12380	P51125_T479	TB_02H-MOCK_00H	0.516215	0.498705	0.84091	no	0.516215	0.498705
P51150	Rab7	RAB7, member RAS oncogene family	19349	P51150_S72	TB_02H-MOCK_00H	0.967357	0.0164406	0.1759	no	0.967357	0.0164406
P51612	Xpc	xeroderma pigmentosum, complementation group C	22591	P51612_S875;P51612_S876	TB_02H-MOCK_00H	-0.468028	0.561266	0.865778	no	-0.468028	0.561266
P51660	Hsd17b4	hydroxysteroid (17-beta) dehydrogenase 4	15488	P51660_S3	TB_02H-MOCK_00H	-0.0948704	0.662046	0.908136	no	-0.0948704	0.662046
P51675	Ccr1	chemokine (C-C motif) receptor 1	12768	P51675_S352	TB_02H-MOCK_00H	#NUM!		0	yes	-6.19623	0.0394693
P51682	Ccr5	chemokine (C-C motif) receptor 5	12774	P51682_S351	TB_02H-MOCK_00H	-0.389946	0.238243	0.6683	no	-0.389946	0.238243
P51682	Ccr5	chemokine (C-C motif) receptor 5	12774	P51682_S351;P51682_T352	TB_02H-MOCK_00H	-0.948565	0.0674811	0.372491	no	-0.948565	0.0674811
P51830	Adcy9	adenylate cyclase 9	11515	P51830_S1332	TB_02H-MOCK_00H	#NUM!		0	yes	5.51819	0.014234
P51830	Adcy9	adenylate cyclase 9	11515	P51830_S610	TB_02H-MOCK_00H	#NUM!		0	yes	-6.88783	0.0231608
P51830	Adcy9	adenylate cyclase 9	11515	P51830_S613	TB_02H-MOCK_00H	-0.149944	0.510581	0.846082	no	-0.149944	0.510581
P51859	Hdgf	heparin binding growth factor	15191	P51859_S165	TB_02H-MOCK_00H	0.299189	0.618449	0.891048	no	0.299189	0.618449
P51908	Apobec1	apolipoprotein B mRNA editing enzyme, catalytic polypeptide 1	11810	P51908_S2	TB_02H-MOCK_00H	-0.413206	0.213211	0.637968	no	-0.413206	0.213211
P51908	Apobec1	apolipoprotein B mRNA editing enzyme, catalytic polypeptide 1	11810	P51908_S3	TB_02H-MOCK_00H	0.249067	0.544451	0.860369	no	0.249067	0.544451
P51908	Apobec1	apolipoprotein B mRNA editing enzyme, catalytic polypeptide 1	11810	P51908_S3;P51908_T5	TB_02H-MOCK_00H	-0.0968435	0.820642	0.959294	no	-0.0968435	0.820642
P51954	Nek1	NIMA (never in mitosis gene a)-related expressed kinase 1	18004	P51954_S997	TB_02H-MOCK_00H	-0.282905	0.0428491	0.299417	no	-0.282905	0.0428491
P52479	Usp10	ubiquitin specific peptidase 10	22224	P52479_S208	TB_02H-MOCK_00H	-0.189274	0.435665	0.815336	no	-0.189274	0.435665
P52479	Usp10	ubiquitin specific peptidase 10	22224	P52479_S208;P52479_S223	TB_02H-MOCK_00H	0.511707	0.301992	0.728093	no	0.511707	0.301992
P52479	Usp10	ubiquitin specific peptidase 10	22224	P52479_S570	TB_02H-MOCK_00H	0.519576	0.328871	0.754574	no	0.519576	0.328871
P52479	Usp10	ubiquitin specific peptidase 10	22224	P52479_T205	TB_02H-MOCK_00H	0.154157	0.752698	0.938321	no	0.154157	0.752698
P52482	Ube2e1	ubiquitin-conjugating enzyme E2E 1	22194	P52482_S2	TB_02H-MOCK_00H	-1.27992	0.046996	0.312782	no	-1.27992	0.046996
P52927	Hmga2	high mobility group AT-hook 2	15364	P52927_S100	TB_02H-MOCK_00H	4.06448	0.0850916	0.417562	no	4.06448	0.0850916
P52927	Hmga2	high mobility group AT-hook 2	15364	P52927_S101	TB_02H-MOCK_00H	0.104286	0.913816	0.977117	no	0.104286	0.913816
P52927	Hmga2	high mobility group AT-hook 2	15364	P52927_S104	TB_02H-MOCK_00H	0.21523	0.565256	0.866281	no	0.21523	0.565256
P52927	Hmga2	high mobility group AT-hook 2	15364	P52927_S12	TB_02H-MOCK_00H	0.521676	0.757514	0.940926	no	0.521676	0.757514
P52927	Hmga2	high mobility group AT-hook 2	15364	P52927_S2	TB_02H-MOCK_00H	-0.153602	0.73937	0.932307	no	-0.153602	0.73937
P52927	Hmga2	high mobility group AT-hook 2	15364	P52927_S44	TB_02H-MOCK_00H	-0.0141388	0.982292	0.995759	no	-0.0141388	0.982292
P53026	P53026			P53026_Y205;P53026_T209	TB_02H-MOCK_00H	#NUM!		0	yes	5.10152	0.0408847
P53349	P53349			P53349_S1007	TB_02H-MOCK_00H	-1.18322	0.00848901	0.122498	no	-1.18322	0.00848901
P53349	P53349			P53349_S138	TB_02H-MOCK_00H	0.298706	0.371244	0.789562	no	0.298706	0.371244
P53349	P53349			P53349_S261	TB_02H-MOCK_00H	1.37418	0.0198557	0.196087	no	1.37418	0.0198557
P53349	P53349			P53349_S913	TB_02H-MOCK_00H	-0.371351	0.340179	0.763936	no	-0.371351	0.340179
P53349	P53349			P53349_S915	TB_02H-MOCK_00H	0.337816	0.461833	0.825445	no	0.337816	0.461833
P53564	Cux1	cut-like homeobox 1	13047	P53564_S1049;P53564_S1054	TB_02H-MOCK_00H	#NUM!		0	yes	7.13249	0.0475336
P53564	Cux1	cut-like homeobox 1	13047	P53564_S1327;P53564_T1339	TB_02H-MOCK_00H	-0.664089	0.333052	0.758044	no	-0.664089	0.333052
P53564	Cux1	cut-like homeobox 1	13047	P53564_S427	TB_02H-MOCK_00H	-0.483343	0.312398	0.739493	no	-0.483343	0.312398
P53564	Cux1	cut-like homeobox 1	13047	P53564_T209;P53564_T216	TB_02H-MOCK_00H	-1.3058	0.0666124	0.369089	no	-1.3058	0.0666124
P53668	Limk1	LIM-domain containing, protein kinase	16885	P53668_S296	TB_02H-MOCK_00H	0.144828	0.719214	0.924663	no	0.144828	0.719214
P53668	Limk1	LIM-domain containing, protein kinase	16885	P53668_S298	TB_02H-MOCK_00H	0.431896	0.00281181	0.0629672	no	0.431896	0.00281181
P53668	Limk1	LIM-domain containing, protein kinase	16885	P53668_S298;P53668_S310	TB_02H-MOCK_00H	1.169	0.201217	0.622691	no	1.169	0.201217
P53986	Slc16a1	solute carrier family 16 (monocarboxylic acid transporters), member 1	20501	P53986_S210	TB_02H-MOCK_00H	#NUM!		0	yes	-8.73033	0.0119077
P53986	Slc16a1	solute carrier family 16 (monocarboxylic acid transporters), member 1	20501	P53986_S477	TB_02H-MOCK_00H	2.64469	9.16201e-06	0.00131189	no	2.64469	9.16201e-06
P53995	Anapc1	anaphase promoting complex subunit 1	17222	P53995_S688	TB_02H-MOCK_00H	#NUM!		0	yes	8.37124	0.0390741
P54116	Stom	stomatin	13830	P54116_S2	TB_02H-MOCK_00H	0.53123	0.652585	0.903543	no	0.53123	0.652585
P54116	Stom	stomatin	13830	P54116_S8	TB_02H-MOCK_00H	0.307953	0.402062	0.805493	no	0.307953	0.402062
P54227	Stmn1	stathmin 1	16765	P54227_S16	TB_02H-MOCK_00H	1.51851	0.0108712	0.141326	no	1.51851	0.0108712
P54227	Stmn1	stathmin 1	16765	P54227_S16;P54227_S25	TB_02H-MOCK_00H	1.23088	0.0465376	0.311271	no	1.23088	0.0465376
P54227	Stmn1	stathmin 1	16765	P54227_S25	TB_02H-MOCK_00H	0.899983	0.0254876	0.22453	no	0.899983	0.0254876
P54254	Atxn1	ataxin 1	20238	P54254_S213;P54254_T218	TB_02H-MOCK_00H	-0.659301	0.000262967	0.0122242	no	-0.659301	0.000262967
P54254	Atxn1	ataxin 1	20238	P54254_S751	TB_02H-MOCK_00H	-0.162525	0.730087	0.930189	no	-0.162525	0.730087
P54254	Atxn1	ataxin 1	20238	P54254_T65	TB_02H-MOCK_00H	2.05012	0.0366087	0.272597	no	2.05012	0.0366087
P54254	Atxn1	ataxin 1	20238	P54254_Y223	TB_02H-MOCK_00H	0.10913	0.572643	0.869257	no	0.10913	0.572643
P54276	Msh6	mutS homolog 6	17688	P54276_S62	TB_02H-MOCK_00H	0.222522	0.753695	0.938921	no	0.222522	0.753695
P54276	Msh6	mutS homolog 6	17688	P54276_S63	TB_02H-MOCK_00H	-0.0291376	0.949143	0.983996	no	-0.0291376	0.949143
P54276	Msh6	mutS homolog 6	17688	P54276_S78	TB_02H-MOCK_00H	-0.432479	0.466153	0.827157	no	-0.432479	0.466153
P54310	Lipe	lipase, hormone sensitive	16890	P54310_S557	TB_02H-MOCK_00H	-0.301654	0.115702	0.483631	no	-0.301654	0.115702
P54310	Lipe	lipase, hormone sensitive	16890	P54310_S559	TB_02H-MOCK_00H	0.0314555	0.884044	0.970483	no	0.0314555	0.884044
P54310	Lipe	lipase, hormone sensitive	16890	P54310_S650	TB_02H-MOCK_00H	-2.00824	0.128162	0.504291	no	-2.00824	0.128162
P54310	Lipe	lipase, hormone sensitive	16890	P54310_T454;P54310_T455;P54310_S458;P54310_S459	TB_02H-MOCK_00H	-0.948319	0.0425132	0.298463	no	-0.948319	0.0425132
P54310	Lipe	lipase, hormone sensitive	16890	P54310_T540;P54310_T544;P54310_T551	TB_02H-MOCK_00H	-0.920467	0.22981	0.659816	no	-0.920467	0.22981
P54731	Faf1	Fas-associated factor 1	14084	P54731_S459;P54731_T471	TB_02H-MOCK_00H	#NUM!		0	yes	-6.44363	0.0357936
P55194	Sh3bp1	SH3-domain binding protein 1	20401	P55194_S177	TB_02H-MOCK_00H	1.03697	0.110677	0.475678	no	1.03697	0.110677
P55194	Sh3bp1	SH3-domain binding protein 1	20401	P55194_S182	TB_02H-MOCK_00H	1.535	0.0512643	0.322346	no	1.535	0.0512643
P55194	Sh3bp1	SH3-domain binding protein 1	20401	P55194_S456	TB_02H-MOCK_00H	0.683313	0.120107	0.492768	no	0.683313	0.120107
P55194	Sh3bp1	SH3-domain binding protein 1	20401	P55194_S460	TB_02H-MOCK_00H	0.777569	0.106694	0.468133	no	0.777569	0.106694
P55194	Sh3bp1	SH3-domain binding protein 1	20401	P55194_S503	TB_02H-MOCK_00H	-0.892102	0.29232	0.719796	no	-0.892102	0.29232
P55194	Sh3bp1	SH3-domain binding protein 1	20401	P55194_S508	TB_02H-MOCK_00H	-0.0423733	0.879153	0.9699	no	-0.0423733	0.879153
P55194	Sh3bp1	SH3-domain binding protein 1	20401	P55194_S510	TB_02H-MOCK_00H	0.0406772	0.931608	0.981534	no	0.0406772	0.931608
P55194	Sh3bp1	SH3-domain binding protein 1	20401	P55194_S553	TB_02H-MOCK_00H	2.36502	0.00471907	0.085548	no	2.36502	0.00471907
P55194	Sh3bp1	SH3-domain binding protein 1	20401	P55194_S598	TB_02H-MOCK_00H	1.01564	0.00295037	0.0650154	no	1.01564	0.00295037
P55194	Sh3bp1	SH3-domain binding protein 1	20401	P55194_T455	TB_02H-MOCK_00H	0.0675572	0.916129	0.977117	no	0.0675572	0.916129
P56183	Rrp1	ribosomal RNA processing 1 homolog (S. cerevisiae)	18114	P56183_S434	TB_02H-MOCK_00H	-0.23156	0.34129	0.76497	no	-0.23156	0.34129
P56212	Arpp19	cAMP-regulated phosphoprotein 19	59046	P56212_S62	TB_02H-MOCK_00H	0.045928	0.950533	0.984342	no	0.045928	0.950533
P56399	Usp5	ubiquitin specific peptidase 5 (isopeptidase T)	22225	P56399_S783	TB_02H-MOCK_00H	-0.290794	0.50486	0.844695	no	-0.290794	0.50486
P56695	Wfs1	wolframin ER transmembrane glycoprotein	22393	P56695_S3;P56695_S9	TB_02H-MOCK_00H	-0.333772	0.652182	0.903543	no	-0.333772	0.652182
P56695	Wfs1	wolframin ER transmembrane glycoprotein	22393	P56695_T5;P56695_S9	TB_02H-MOCK_00H	-0.0547321	0.93954	0.981573	no	-0.0547321	0.93954
P56812	Pdcd5	programmed cell death 5	56330	P56812_S119	TB_02H-MOCK_00H	0.161247	0.809479	0.954883	no	0.161247	0.809479
P57725	Samsn1	SAM domain, SH3 domain and nuclear localization signals, 1	67742	P57725_S21	TB_02H-MOCK_00H	-0.0803834	0.82972	0.959836	no	-0.0803834	0.82972
P57725	Samsn1	SAM domain, SH3 domain and nuclear localization signals, 1	67742	P57725_S22	TB_02H-MOCK_00H	0.358221	0.515934	0.848332	no	0.358221	0.515934
P57725	Samsn1	SAM domain, SH3 domain and nuclear localization signals, 1	67742	P57725_S371	TB_02H-MOCK_00H	0.695186	0.10529	0.464559	no	0.695186	0.10529
P57725	Samsn1	SAM domain, SH3 domain and nuclear localization signals, 1	67742	P57725_S60;P57725_S61;P57725_S65	TB_02H-MOCK_00H	-0.979108	0.184299	0.601513	no	-0.979108	0.184299
P57776	Eef1d	eukaryotic translation elongation factor 1 delta (guanine nucleotide exchange protein)	66656	P57776_S119	TB_02H-MOCK_00H	0.14424	0.737489	0.931776	no	0.14424	0.737489
P57776	Eef1d	eukaryotic translation elongation factor 1 delta (guanine nucleotide exchange protein)	66656	P57776_S133	TB_02H-MOCK_00H	1.20211	0.128074	0.504291	no	1.20211	0.128074
P57776	Eef1d	eukaryotic translation elongation factor 1 delta (guanine nucleotide exchange protein)	66656	P57776_S162	TB_02H-MOCK_00H	0.644676	0.0660197	0.367541	no	0.644676	0.0660197
P57776	Eef1d	eukaryotic translation elongation factor 1 delta (guanine nucleotide exchange protein)	66656	P57776_T129	TB_02H-MOCK_00H	-1.03632	0.0272166	0.231235	no	-1.03632	0.0272166
P57776	Eef1d	eukaryotic translation elongation factor 1 delta (guanine nucleotide exchange protein)	66656	P57776_T142	TB_02H-MOCK_00H	-0.474966	0.519575	0.850512	no	-0.474966	0.519575
P58058	Nadk	NAD kinase	192185	P58058_S46	TB_02H-MOCK_00H	1.17523	0.134324	0.513038	no	1.17523	0.134324
P58058	Nadk	NAD kinase	192185	P58058_S48	TB_02H-MOCK_00H	0.708155	0.498353	0.84091	no	0.708155	0.498353
P58058	Nadk	NAD kinase	192185	P58058_S48;P58058_S50	TB_02H-MOCK_00H	#NUM!		0	yes	-4.48071	0.0346375
P58058	Nadk	NAD kinase	192185	P58058_S64	TB_02H-MOCK_00H	-0.354309	0.4724	0.828419	no	-0.354309	0.4724
P58158	B3gat3	beta-1,3-glucuronyltransferase 3 (glucuronosyltransferase I)	72727	P58158_S329	TB_02H-MOCK_00H	-0.601593	0.1815	0.597419	no	-0.601593	0.1815
P58391	Kcnn3	potassium intermediate/small conductance calcium-activated channel, subfamily N, member 3	140493	P58391_S168;P58391_S178	TB_02H-MOCK_00H	-2.22812	0.0264399	0.227607	no	-2.22812	0.0264399
P58404	Strn4	striatin, calmodulin binding protein 4	97387	P58404_S223	TB_02H-MOCK_00H	0.792334	0.0985565	0.447985	no	0.792334	0.0985565
P58501	Paxbp1	PAX3 and PAX7 binding protein 1	67367	P58501_T548;P58501_S559	TB_02H-MOCK_00H	#NUM!		0	yes	-7.56408	0.0158968
P58801	Ripk2	receptor (TNFRSF)-interacting serine-threonine kinase 2	192656	P58801_S364	TB_02H-MOCK_00H	-0.0764459	0.816969	0.957643	no	-0.0764459	0.816969
P58801	Ripk2	receptor (TNFRSF)-interacting serine-threonine kinase 2	192656	P58801_S411	TB_02H-MOCK_00H	0.230715	0.616439	0.890287	no	0.230715	0.616439
P58801	Ripk2	receptor (TNFRSF)-interacting serine-threonine kinase 2	192656	P58801_S412	TB_02H-MOCK_00H	0.564072	0.0302861	0.246072	no	0.564072	0.0302861
P58802	Tbc1d10a	TBC1 domain family, member 10a	103724	P58802_S18	TB_02H-MOCK_00H	0.646406	0.102842	0.459991	no	0.646406	0.102842
P58802	Tbc1d10a	TBC1 domain family, member 10a	103724	P58802_S383	TB_02H-MOCK_00H	#NUM!		0	yes	-5.23831	0.0252834
P58802	Tbc1d10a	TBC1 domain family, member 10a	103724	P58802_S39;P58802_S43	TB_02H-MOCK_00H	0.0761315	0.919612	0.978234	no	0.0761315	0.919612
P58871	Tnks1bp1	tankyrase 1 binding protein 1	228140	P58871_S1370	TB_02H-MOCK_00H	#NUM!		0	yes	-5.56716	0.0431763
P58871	Tnks1bp1	tankyrase 1 binding protein 1	228140	P58871_S1375	TB_02H-MOCK_00H	0.00449732	0.985285	0.995976	no	0.00449732	0.985285
P58871	Tnks1bp1	tankyrase 1 binding protein 1	228140	P58871_S1611;P58871_S1612	TB_02H-MOCK_00H	-0.998901	0.0482122	0.314007	no	-0.998901	0.0482122
P58871	Tnks1bp1	tankyrase 1 binding protein 1	228140	P58871_S1657	TB_02H-MOCK_00H	-0.0363657	0.96622	0.990094	no	-0.0363657	0.96622
P58871	Tnks1bp1	tankyrase 1 binding protein 1	228140	P58871_S911	TB_02H-MOCK_00H	0.357887	0.392336	0.803811	no	0.357887	0.392336
P59114	Pcif1	PDX1 C-terminal inhibiting factor 1	228866	P59114_S143	TB_02H-MOCK_00H	-0.239091	0.247085	0.677636	no	-0.239091	0.247085
P59114	Pcif1	PDX1 C-terminal inhibiting factor 1	228866	P59114_S144	TB_02H-MOCK_00H	0.685963	0.387793	0.799038	no	0.685963	0.387793
P59114	Pcif1	PDX1 C-terminal inhibiting factor 1	228866	P59114_S144;P59114_T150	TB_02H-MOCK_00H	0.145135	0.535725	0.858235	no	0.145135	0.535725
P59114	Pcif1	PDX1 C-terminal inhibiting factor 1	228866	P59114_S17;P59114_S19	TB_02H-MOCK_00H	-0.330341	0.356977	0.775831	no	-0.330341	0.356977
P59114	Pcif1	PDX1 C-terminal inhibiting factor 1	228866	P59114_S19;P59114_S23;P59114_S30	TB_02H-MOCK_00H	-0.235697	0.766806	0.943003	no	-0.235697	0.766806
P59114	Pcif1	PDX1 C-terminal inhibiting factor 1	228866	P59114_S8;P59114_T22	TB_02H-MOCK_00H	-0.178171	0.593653	0.880005	no	-0.178171	0.593653
P59281	Arhgap39	Rho GTPase activating protein 39	223666	P59281_S362	TB_02H-MOCK_00H	0.276335	0.382287	0.795166	no	0.276335	0.382287
P59281	Arhgap39	Rho GTPase activating protein 39	223666	P59281_S597	TB_02H-MOCK_00H	0.010105	0.96456	0.989495	no	0.010105	0.96456
P59325	Eif5	eukaryotic translation initiation factor 5	217869	P59325_S10	TB_02H-MOCK_00H	1.86387	0.00029575	0.0130935	no	1.86387	0.00029575
P59328	Wdhd1	WD repeat and HMG-box DNA binding protein 1	218973	P59328_S821	TB_02H-MOCK_00H	-0.487583	0.268153	0.696625	no	-0.487583	0.268153
P59438	Hps5	HPS5, biogenesis of lysosomal organelles complex 2 subunit 2	246694	P59438_S658	TB_02H-MOCK_00H	#NUM!		0	yes	7.84021	0.0486754
P59438	Hps5	HPS5, biogenesis of lysosomal organelles complex 2 subunit 2	246694	P59438_S662	TB_02H-MOCK_00H	#NUM!		0	yes	4.9984	0.0412661
P59672	Anks1	ankyrin repeat and SAM domain containing 1	224650	P59672_S461	TB_02H-MOCK_00H	0.575127	0.237565	0.666986	no	0.575127	0.237565
P59672	Anks1	ankyrin repeat and SAM domain containing 1	224650	P59672_S636	TB_02H-MOCK_00H	0.883001	0.00223484	0.0536744	no	0.883001	0.00223484
P59672	Anks1	ankyrin repeat and SAM domain containing 1	224650	P59672_S638	TB_02H-MOCK_00H	-0.187573	0.658692	0.905561	no	-0.187573	0.658692
P59672	Anks1	ankyrin repeat and SAM domain containing 1	224650	P59672_S640	TB_02H-MOCK_00H	-0.152455	0.826335	0.959836	no	-0.152455	0.826335
P59672	Anks1	ankyrin repeat and SAM domain containing 1	224650	P59672_S640;P59672_S644	TB_02H-MOCK_00H	0.318116	0.640624	0.901169	no	0.318116	0.640624
P59672	Anks1	ankyrin repeat and SAM domain containing 1	224650	P59672_S644	TB_02H-MOCK_00H	0.0359023	0.935884	0.981534	no	0.0359023	0.935884
P59672	Anks1	ankyrin repeat and SAM domain containing 1	224650	P59672_S644;P59672_S650	TB_02H-MOCK_00H	#NUM!		0	yes	6.66492	0.0151633
P59672	Anks1	ankyrin repeat and SAM domain containing 1	224650	P59672_S663	TB_02H-MOCK_00H	0.129133	0.685	0.914458	no	0.129133	0.685
P59672	Anks1	ankyrin repeat and SAM domain containing 1	224650	P59672_S663;P59672_S665	TB_02H-MOCK_00H	-0.088357	0.851993	0.964231	no	-0.088357	0.851993
P59672	Anks1	ankyrin repeat and SAM domain containing 1	224650	P59672_S679	TB_02H-MOCK_00H	0.0785619	0.742813	0.934024	no	0.0785619	0.742813
P59672	Anks1	ankyrin repeat and SAM domain containing 1	224650	P59672_S893;P59672_T896	TB_02H-MOCK_00H	-0.505919	0.306376	0.733859	no	-0.505919	0.306376
P59672	Anks1	ankyrin repeat and SAM domain containing 1	224650	P59672_S903	TB_02H-MOCK_00H	1.62168	0.154987	0.554449	no	1.62168	0.154987
P59672	Anks1	ankyrin repeat and SAM domain containing 1	224650	P59672_S911	TB_02H-MOCK_00H	#NUM!		0	yes	-5.9808	0.0267037
P59672	Anks1	ankyrin repeat and SAM domain containing 1	224650	P59672_T648	TB_02H-MOCK_00H	-0.128057	0.754964	0.939806	no	-0.128057	0.754964
P59729	Rin3	Ras and Rab interactor 3	217835	P59729_S869	TB_02H-MOCK_00H	0.408945	0.512494	0.846082	no	0.408945	0.512494
P59759	Mrtfb	myocardin related transcription factor B	239719	P59759_S209	TB_02H-MOCK_00H	-0.117235	0.76969	0.943772	no	-0.117235	0.76969
P59759	Mrtfb	myocardin related transcription factor B	239719	P59759_S540	TB_02H-MOCK_00H	0.751271	0.373817	0.791352	no	0.751271	0.373817
P59759	Mrtfb	myocardin related transcription factor B	239719	P59759_S66	TB_02H-MOCK_00H	0.239985	0.746385	0.935388	no	0.239985	0.746385
P59759	Mrtfb	myocardin related transcription factor B	239719	P59759_S838	TB_02H-MOCK_00H	#NUM!		0	yes	8.16304	0.0353269
P59764	Dock4	dedicator of cytokinesis 4	238130	P59764_S1627	TB_02H-MOCK_00H	-0.0206241	0.972497	0.992765	no	-0.0206241	0.972497
P59808	Sash1	SAM and SH3 domain containing 1	70097	P59808_S1008;P59808_S1014	TB_02H-MOCK_00H	1.23072	0.00197256	0.0484376	no	1.23072	0.00197256
P59808	Sash1	SAM and SH3 domain containing 1	70097	P59808_S1011	TB_02H-MOCK_00H	0.214304	0.770883	0.943772	no	0.214304	0.770883
P59808	Sash1	SAM and SH3 domain containing 1	70097	P59808_S1014	TB_02H-MOCK_00H	#NUM!		0	yes	-5.36449	0.0421942
P59808	Sash1	SAM and SH3 domain containing 1	70097	P59808_S130	TB_02H-MOCK_00H	-0.41428	0.664322	0.908784	no	-0.41428	0.664322
P59808	Sash1	SAM and SH3 domain containing 1	70097	P59808_S163	TB_02H-MOCK_00H	#NUM!		0	yes	8.83817	0.0195002
P59808	Sash1	SAM and SH3 domain containing 1	70097	P59808_S380	TB_02H-MOCK_00H	#NUM!		0	yes	-4.74673	0.0397995
P59808	Sash1	SAM and SH3 domain containing 1	70097	P59808_S400	TB_02H-MOCK_00H	-0.198858	0.370737	0.789311	no	-0.198858	0.370737
P59808	Sash1	SAM and SH3 domain containing 1	70097	P59808_S435	TB_02H-MOCK_00H	0.68606	0.0565721	0.340899	no	0.68606	0.0565721
P59808	Sash1	SAM and SH3 domain containing 1	70097	P59808_S500	TB_02H-MOCK_00H	0.343239	0.185538	0.603137	no	0.343239	0.185538
P59808	Sash1	SAM and SH3 domain containing 1	70097	P59808_S711	TB_02H-MOCK_00H	#NUM!		0	yes	5.32536	0.0195189
P59808	Sash1	SAM and SH3 domain containing 1	70097	P59808_S714	TB_02H-MOCK_00H	0.571678	0.323569	0.749416	no	0.571678	0.323569
P59808	Sash1	SAM and SH3 domain containing 1	70097	P59808_S718	TB_02H-MOCK_00H	0.0640239	0.915428	0.977117	no	0.0640239	0.915428
P59808	Sash1	SAM and SH3 domain containing 1	70097	P59808_S718;P59808_S723	TB_02H-MOCK_00H	0.105259	0.870919	0.968794	no	0.105259	0.870919
P59808	Sash1	SAM and SH3 domain containing 1	70097	P59808_S723	TB_02H-MOCK_00H	-0.533083	0.0759226	0.395421	no	-0.533083	0.0759226
P59808	Sash1	SAM and SH3 domain containing 1	70097	P59808_S805	TB_02H-MOCK_00H	0.729855	0.437279	0.81573	no	0.729855	0.437279
P59808	Sash1	SAM and SH3 domain containing 1	70097	P59808_S83	TB_02H-MOCK_00H	-0.057276	0.899102	0.972932	no	-0.057276	0.899102
P59808	Sash1	SAM and SH3 domain containing 1	70097	P59808_S83;P59808_S94	TB_02H-MOCK_00H	1.69697	3.79192e-06	0.000705081	no	1.69697	3.79192e-06
P59808	Sash1	SAM and SH3 domain containing 1	70097	P59808_S831	TB_02H-MOCK_00H	0.829096	0.364101	0.782588	no	0.829096	0.364101
P59808	Sash1	SAM and SH3 domain containing 1	70097	P59808_S9	TB_02H-MOCK_00H	0.744058	0.167238	0.577758	no	0.744058	0.167238
P59997	Kdm2a	lysine (K)-specific demethylase 2A	225876	P59997_S422	TB_02H-MOCK_00H	-0.510553	0.414122	0.808993	no	-0.510553	0.414122
P59997	Kdm2a	lysine (K)-specific demethylase 2A	225876	P59997_S558	TB_02H-MOCK_00H	-0.244848	0.629991	0.896366	no	-0.244848	0.629991
P59997	Kdm2a	lysine (K)-specific demethylase 2A	225876	P59997_S692	TB_02H-MOCK_00H	-0.00401977	0.988807	0.995976	no	-0.00401977	0.988807
P59997	Kdm2a	lysine (K)-specific demethylase 2A	225876	P59997_T713;P59997_S718	TB_02H-MOCK_00H	-0.105098	0.785695	0.948601	no	-0.105098	0.785695
P59997	Kdm2a	lysine (K)-specific demethylase 2A	225876	P59997_T713;P59997_T720	TB_02H-MOCK_00H	-0.0870675	0.929154	0.980833	no	-0.0870675	0.929154
P60335	Pcbp1	poly(rC) binding protein 1	23983	P60335_S171	TB_02H-MOCK_00H	0.505716	0.492604	0.836826	no	0.505716	0.492604
P60335	Pcbp1	poly(rC) binding protein 1	23983	P60335_S173	TB_02H-MOCK_00H	1.65323	0.00634081	0.101391	no	1.65323	0.00634081
P60335	Pcbp1	poly(rC) binding protein 1	23983	P60335_S189	TB_02H-MOCK_00H	0.0381783	0.924804	0.979275	no	0.0381783	0.924804
P60335	Pcbp1	poly(rC) binding protein 1	23983	P60335_S190	TB_02H-MOCK_00H	0.0595551	0.928322	0.980833	no	0.0595551	0.928322
P60335	Pcbp1	poly(rC) binding protein 1	23983	P60335_S262	TB_02H-MOCK_00H	-0.577115	0.632022	0.897686	no	-0.577115	0.632022
P60335	Pcbp1	poly(rC) binding protein 1	23983	P60335_S264	TB_02H-MOCK_00H	-1.0445	0.529515	0.856055	no	-1.0445	0.529515
P60335	Pcbp1	poly(rC) binding protein 1	23983	P60335_T169	TB_02H-MOCK_00H	#NUM!		0	yes	-8.49268	0.0373392
P60710	Actb	actin, beta	11461	P60710_S323	TB_02H-MOCK_00H	#NUM!		0	yes	-4.57017	0.0306626
P60710	Actb	actin, beta	11461	P60710_S33	TB_02H-MOCK_00H	0.155234	0.718863	0.92449	no	0.155234	0.718863
P60904	Dnajc5	DnaJ heat shock protein family (Hsp40) member C5	13002	P60904_S10	TB_02H-MOCK_00H	-0.190147	0.788301	0.949556	no	-0.190147	0.788301
P61028	Rab8b	RAB8B, member RAS oncogene family	235442	P61028_S180	TB_02H-MOCK_00H	-0.408982	0.401047	0.805493	no	-0.408982	0.401047
P61028	Rab8b	RAB8B, member RAS oncogene family	235442	P61028_S180;P61028_S182	TB_02H-MOCK_00H	-1.35623	3.12046e-05	0.00270772	no	-1.35623	3.12046e-05
P61028	Rab8b	RAB8B, member RAS oncogene family	235442	P61028_S180;P61028_S183	TB_02H-MOCK_00H	-1.102	0.0649986	0.365581	no	-1.102	0.0649986
P61028	Rab8b	RAB8B, member RAS oncogene family	235442	P61028_S182	TB_02H-MOCK_00H	-0.941207	0.0813372	0.408359	no	-0.941207	0.0813372
P61028	Rab8b	RAB8B, member RAS oncogene family	235442	P61028_S183	TB_02H-MOCK_00H	-0.421013	0.295782	0.722141	no	-0.421013	0.295782
P61979	Hnrnpk	heterogeneous nuclear ribonucleoprotein K	15387	P61979_S116	TB_02H-MOCK_00H	1.53095	0.256722	0.686985	no	1.53095	0.256722
P61979	Hnrnpk	heterogeneous nuclear ribonucleoprotein K	15387	P61979_S284	TB_02H-MOCK_00H	-0.0398241	0.960658	0.987672	no	-0.0398241	0.960658
P61982	Ywhag	tyrosine 3-monooxygenase/tryptophan 5-monooxygenase activation protein, gamma polypeptide	22628	P61982_S71	TB_02H-MOCK_00H	0.504068	0.181842	0.597994	no	0.504068	0.181842
P62046	Lrch1	leucine-rich repeats and calponin homology (CH) domain containing 1	380916	P62046_T581	TB_02H-MOCK_00H	-0.731398	0.0258788	0.225493	no	-0.731398	0.0258788
P62317	Snrpd2	small nuclear ribonucleoprotein D2	107686	P62317_S2	TB_02H-MOCK_00H	#NUM!		0	yes	-4.5888	0.0134923
P62482	Kcnab2	potassium voltage-gated channel, shaker-related subfamily, beta member 2	16498	P62482_S111	TB_02H-MOCK_00H	#NUM!		0	yes	6.10707	0.0220271
P62482	Kcnab2	potassium voltage-gated channel, shaker-related subfamily, beta member 2	16498	P62482_S112	TB_02H-MOCK_00H	0.342508	0.269768	0.698349	no	0.342508	0.269768
P62482	Kcnab2	potassium voltage-gated channel, shaker-related subfamily, beta member 2	16498	P62482_S14	TB_02H-MOCK_00H	-0.185433	0.642516	0.901169	no	-0.185433	0.642516
P62482	Kcnab2	potassium voltage-gated channel, shaker-related subfamily, beta member 2	16498	P62482_S5	TB_02H-MOCK_00H	0.448788	0.455	0.823788	no	0.448788	0.455
P62482	Kcnab2	potassium voltage-gated channel, shaker-related subfamily, beta member 2	16498	P62482_S9	TB_02H-MOCK_00H	-0.451073	0.411124	0.808847	no	-0.451073	0.411124
P62482	Kcnab2	potassium voltage-gated channel, shaker-related subfamily, beta member 2	16498	P62482_T7	TB_02H-MOCK_00H	-0.0460119	0.836907	0.959836	no	-0.0460119	0.836907
P62717	Rpl18a	ribosomal protein L18A	76808	P62717_S71	TB_02H-MOCK_00H	0.0311862	0.959045	0.987454	no	0.0311862	0.959045
P62751	Rpl23a	ribosomal protein L23A	268449	P62751_S43	TB_02H-MOCK_00H	0.833471	0.167067	0.577758	no	0.833471	0.167067
P62754	Rps6	ribosomal protein S6	20104	P62754_S235;P62754_S236	TB_02H-MOCK_00H	-3.41193	0.000522657	0.0197759	no	-3.41193	0.000522657
P62754	Rps6	ribosomal protein S6	20104	P62754_S235;P62754_S242;P62754_S244;P62754_S247	TB_02H-MOCK_00H	-1.311	0.474044	0.828419	no	-1.311	0.474044
P62754	Rps6	ribosomal protein S6	20104	P62754_S236	TB_02H-MOCK_00H	-2.11685	0.0265818	0.228335	no	-2.11685	0.0265818
P62754	Rps6	ribosomal protein S6	20104	P62754_S236;P62754_S240	TB_02H-MOCK_00H	-0.019512	0.972494	0.992765	no	-0.019512	0.972494
P62754	Rps6	ribosomal protein S6	20104	P62754_S236;P62754_S240;P62754_S244	TB_02H-MOCK_00H	-1.23764	0.1357	0.514644	no	-1.23764	0.1357
P62754	Rps6	ribosomal protein S6	20104	P62754_S236;P62754_S240;P62754_S244;P62754_S247	TB_02H-MOCK_00H	0.569012	0.772765	0.94473	no	0.569012	0.772765
P62754	Rps6	ribosomal protein S6	20104	P62754_S236;P62754_S240;P62754_S247	TB_02H-MOCK_00H	1.37741	0.000435288	0.0174868	no	1.37741	0.000435288
P62754	Rps6	ribosomal protein S6	20104	P62754_S236;P62754_S244;P62754_S247	TB_02H-MOCK_00H	#NUM!		0	yes	7.74077	0.0268297
P62754	Rps6	ribosomal protein S6	20104	P62754_S236;P62754_S246	TB_02H-MOCK_00H	-0.496563	0.5332	0.857229	no	-0.496563	0.5332
P62754	Rps6	ribosomal protein S6	20104	P62754_S236;P62754_S247	TB_02H-MOCK_00H	-1.45014	0.120192	0.492768	no	-1.45014	0.120192
P62754	Rps6	ribosomal protein S6	20104	P62754_S236;P62754_T241	TB_02H-MOCK_00H	-4.98273	9.27273e-06	0.00131189	no	-4.98273	9.27273e-06
P62754	Rps6	ribosomal protein S6	20104	P62754_S240	TB_02H-MOCK_00H	0.104336	0.899805	0.972932	no	0.104336	0.899805
P62754	Rps6	ribosomal protein S6	20104	P62754_S240;P62754_S246	TB_02H-MOCK_00H	0.371012	0.782801	0.948216	no	0.371012	0.782801
P62754	Rps6	ribosomal protein S6	20104	P62754_S240;P62754_S246;P62754_S247	TB_02H-MOCK_00H	3.70521	0.22736	0.655912	no	3.70521	0.22736
P62754	Rps6	ribosomal protein S6	20104	P62754_S242;P62754_S244;P62754_S247	TB_02H-MOCK_00H	2.63893	0.12309	0.495406	no	2.63893	0.12309
P62754	Rps6	ribosomal protein S6	20104	P62754_S244;P62754_S246;P62754_S247	TB_02H-MOCK_00H	1.19622	0.133325	0.511904	no	1.19622	0.133325
P62754	Rps6	ribosomal protein S6	20104	P62754_S244;P62754_S247	TB_02H-MOCK_00H	0.274111	0.705265	0.921144	no	0.274111	0.705265
P62754	Rps6	ribosomal protein S6	20104	P62754_T241;P62754_S246;P62754_S247	TB_02H-MOCK_00H	0.807949	0.728115	0.929471	no	0.807949	0.728115
P62806	Hist1h4h	histone cluster 1, H4h	69386	P62806_S48	TB_02H-MOCK_00H	-0.151873	0.803104	0.953759	no	-0.151873	0.803104
P62821	Rab1a	RAB1A, member RAS oncogene family	19324	P62821_S2;P62821_S3	TB_02H-MOCK_00H	-0.760583	0.373891	0.791352	no	-0.760583	0.373891
P62908	Rps3	ribosomal protein S3	27050	P62908_T220	TB_02H-MOCK_00H	-0.430845	0.508255	0.845606	no	-0.430845	0.508255
P62960	Ybx1	Y box protein 1	22608	P62960_S163	TB_02H-MOCK_00H	-0.723918	0.733955	0.931106	no	-0.723918	0.733955
P62960	Ybx1	Y box protein 1	22608	P62960_S165	TB_02H-MOCK_00H	0.00525425	0.997865	0.999485	no	0.00525425	0.997865
P62960	Ybx1	Y box protein 1	22608	P62960_S174	TB_02H-MOCK_00H	0.410107	0.604416	0.884305	no	0.410107	0.604416
P62960	Ybx1	Y box protein 1	22608	P62960_S2	TB_02H-MOCK_00H	-0.172029	0.871538	0.968794	no	-0.172029	0.871538
P62960	Ybx1	Y box protein 1	22608	P62960_S30;P62960_T41	TB_02H-MOCK_00H	#NUM!		0	yes	-6.69116	0.0307507
P62960	Ybx1	Y box protein 1	22608	P62960_S311	TB_02H-MOCK_00H	-2.60325	0.00331538	0.0705113	no	-2.60325	0.00331538
P62960	Ybx1	Y box protein 1	22608	P62960_S312	TB_02H-MOCK_00H	1.56453	0.202762	0.624797	no	1.56453	0.202762
P62960	Ybx1	Y box protein 1	22608	P62960_Y160	TB_02H-MOCK_00H	#NUM!		0	yes	-9.22625	0.0455439
P62996	Tra2b	transformer 2 beta	20462	P62996_S2	TB_02H-MOCK_00H	0.188528	0.697033	0.918022	no	0.188528	0.697033
P62996	Tra2b	transformer 2 beta	20462	P62996_S264;P62996_S266	TB_02H-MOCK_00H	0.546401	0.75512	0.93982	no	0.546401	0.75512
P62996	Tra2b	transformer 2 beta	20462	P62996_T201	TB_02H-MOCK_00H	0.0378551	0.982364	0.995759	no	0.0378551	0.982364
P62996	Tra2b	transformer 2 beta	20462	P62996_T203	TB_02H-MOCK_00H	#NUM!		0	yes	7.16462	0.0132003
P62996	Tra2b	transformer 2 beta	20462	P62996_Y207	TB_02H-MOCK_00H	0.194091	0.865818	0.967734	no	0.194091	0.865818
P63024	Vamp3	vesicle-associated membrane protein 3	22319	P63024_S10	TB_02H-MOCK_00H	1.19666	0.201024	0.622391	no	1.19666	0.201024
P63024	Vamp3	vesicle-associated membrane protein 3	22319	P63024_S15	TB_02H-MOCK_00H	2.45071	0.00234326	0.055054	no	2.45071	0.00234326
P63024	Vamp3	vesicle-associated membrane protein 3	22319	P63024_S2	TB_02H-MOCK_00H	-0.720922	0.537901	0.859097	no	-0.720922	0.537901
P63024	Vamp3	vesicle-associated membrane protein 3	22319	P63024_S2;P63024_S9	TB_02H-MOCK_00H	#NUM!		0	yes	7.59061	0.0473195
P63024	Vamp3	vesicle-associated membrane protein 3	22319	P63024_T13	TB_02H-MOCK_00H	0.1694	0.863365	0.966645	no	0.1694	0.863365
P63024	Vamp3	vesicle-associated membrane protein 3	22319	P63024_T3	TB_02H-MOCK_00H	0.126792	0.813472	0.956122	no	0.126792	0.813472
P63073	Eif4e	eukaryotic translation initiation factor 4E	13684	P63073_T211	TB_02H-MOCK_00H	0.148205	0.6171	0.890287	no	0.148205	0.6171
P63085	Mapk1	mitogen-activated protein kinase 1	26413	P63085_T179;P63085_Y185	TB_02H-MOCK_00H	1.79289	0.0487761	0.314292	no	1.79289	0.0487761
P63085	Mapk1	mitogen-activated protein kinase 1	26413	P63085_T183	TB_02H-MOCK_00H	-0.620938	0.0895917	0.429007	no	-0.620938	0.0895917
P63085	Mapk1	mitogen-activated protein kinase 1	26413	P63085_T183;P63085_Y185	TB_02H-MOCK_00H	1.36109	0.0255305	0.22453	no	1.36109	0.0255305
P63085	Mapk1	mitogen-activated protein kinase 1	26413	P63085_T188	TB_02H-MOCK_00H	#NUM!		0	yes	-5.8684	0.0260819
P63085	Mapk1	mitogen-activated protein kinase 1	26413	P63085_Y185	TB_02H-MOCK_00H	1.65252	0.0251955	0.223701	no	1.65252	0.0251955
P63094	Gnas	GNAS (guanine nucleotide binding protein, alpha stimulating) complex locus	14683	P63094_S349	TB_02H-MOCK_00H	-0.310624	0.512283	0.846082	no	-0.310624	0.512283
P63094	Gnas	GNAS (guanine nucleotide binding protein, alpha stimulating) complex locus	14683	P63094_T350	TB_02H-MOCK_00H	0.580673	0.580584	0.873224	no	0.580673	0.580584
P63157	Barhl1	BarH like homeobox 1	54422	P63157_S34;P63157_S39	TB_02H-MOCK_00H	0.767684	0.205194	0.627834	no	0.767684	0.205194
P63166	Sumo1	small ubiquitin-like modifier 1	22218	P63166_S2	TB_02H-MOCK_00H	0.26507	0.408927	0.808847	no	0.26507	0.408927
P63213	Gng2	guanine nucleotide binding protein (G protein), gamma 2	14702	P63213_S8	TB_02H-MOCK_00H	-0.0134045	0.977021	0.993346	no	-0.0134045	0.977021
P63213	Gng2	guanine nucleotide binding protein (G protein), gamma 2	14702	P63213_T6	TB_02H-MOCK_00H	0.087134	0.778287	0.947843	no	0.087134	0.778287
P63276	Rps17	ribosomal protein S17	20068	P63276_S113	TB_02H-MOCK_00H	0.948442	0.00877169	0.123563	no	0.948442	0.00877169
P68181	Prkacb	protein kinase, cAMP dependent, catalytic, beta	18749	P68181_S15	TB_02H-MOCK_00H	0.340932	0.506049	0.844695	no	0.340932	0.506049
P68181	Prkacb	protein kinase, cAMP dependent, catalytic, beta	18749	P68181_T196	TB_02H-MOCK_00H	-0.00647901	0.990467	0.995976	no	-0.00647901	0.990467
P68181	Prkacb	protein kinase, cAMP dependent, catalytic, beta	18749	P68181_T198	TB_02H-MOCK_00H	-0.158139	0.735543	0.931503	no	-0.158139	0.735543
P68404	Prkcb	protein kinase C, beta	18751	P68404_S11	TB_02H-MOCK_00H	-0.166465	0.664661	0.908784	no	-0.166465	0.664661
P70182	Pip5k1a	phosphatidylinositol-4-phosphate 5-kinase, type 1 alpha	18720	P70182_S458	TB_02H-MOCK_00H	0.516136	0.24522	0.67594	no	0.516136	0.24522
P70182	Pip5k1a	phosphatidylinositol-4-phosphate 5-kinase, type 1 alpha	18720	P70182_S461	TB_02H-MOCK_00H	-1.15264	0.0743561	0.391196	no	-1.15264	0.0743561
P70188	Kifap3	kinesin-associated protein 3	16579	P70188_S102	TB_02H-MOCK_00H	-1.37189	0.198771	0.620133	no	-1.37189	0.198771
P70188	Kifap3	kinesin-associated protein 3	16579	P70188_S60	TB_02H-MOCK_00H	1.57666	0.000165404	0.0090458	no	1.57666	0.000165404
P70196	Traf6	TNF receptor-associated factor 6	22034	P70196_T526	TB_02H-MOCK_00H	#NUM!		0	yes	7.977	0.0176022
P70206	Plxna1	plexin A1	18844	P70206_S1623	TB_02H-MOCK_00H	-1.18016	0.117903	0.487911	no	-1.18016	0.117903
P70206	Plxna1	plexin A1	18844	P70206_S1629	TB_02H-MOCK_00H	#NUM!		0	yes	5.42618	0.033788
P70206	Plxna1	plexin A1	18844	P70206_S1630	TB_02H-MOCK_00H	1.18017	0.000214424	0.0106525	no	1.18017	0.000214424
P70206	Plxna1	plexin A1	18844	P70206_S1633	TB_02H-MOCK_00H	-0.041304	0.873835	0.969859	no	-0.041304	0.873835
P70227	Itpr3	inositol 1,4,5-triphosphate receptor 3	16440	P70227_S1831	TB_02H-MOCK_00H	-0.829024	0.0951597	0.442318	no	-0.829024	0.0951597
P70227	Itpr3	inositol 1,4,5-triphosphate receptor 3	16440	P70227_S1832	TB_02H-MOCK_00H	-2.47649	2.71939e-05	0.00262829	no	-2.47649	2.71939e-05
P70227	Itpr3	inositol 1,4,5-triphosphate receptor 3	16440	P70227_S2669	TB_02H-MOCK_00H	0.215272	0.480073	0.830052	no	0.215272	0.480073
P70227	Itpr3	inositol 1,4,5-triphosphate receptor 3	16440	P70227_S934	TB_02H-MOCK_00H	-0.814671	0.00506018	0.0889362	no	-0.814671	0.00506018
P70248	P70248			P70248_S1003	TB_02H-MOCK_00H	2.07632	0.0417157	0.295093	no	2.07632	0.0417157
P70248	P70248			P70248_S1006	TB_02H-MOCK_00H	0.95903	0.266352	0.695795	no	0.95903	0.266352
P70255	Nfic	nuclear factor I/C	18029	P70255_S305	TB_02H-MOCK_00H	#NUM!		0	yes	-5.79639	0.0442933
P70265	Pfkfb2	6-phosphofructo-2-kinase/fructose-2,6-biphosphatase 2	18640	P70265_S469	TB_02H-MOCK_00H	-0.59077	0.177529	0.592012	no	-0.59077	0.177529
P70265	Pfkfb2	6-phosphofructo-2-kinase/fructose-2,6-biphosphatase 2	18640	P70265_S486	TB_02H-MOCK_00H	0.914981	0.148434	0.540491	no	0.914981	0.148434
P70265	Pfkfb2	6-phosphofructo-2-kinase/fructose-2,6-biphosphatase 2	18640	P70265_T471	TB_02H-MOCK_00H	0.0526758	0.878404	0.9699	no	0.0526758	0.878404
P70268	Pkn1	protein kinase N1	320795	P70268_S498	TB_02H-MOCK_00H	0.980042	0.0164147	0.1759	no	0.980042	0.0164147
P70268	Pkn1	protein kinase N1	320795	P70268_S528;P70268_S540	TB_02H-MOCK_00H	1.5888	0.00202277	0.049304	no	1.5888	0.00202277
P70268	Pkn1	protein kinase N1	320795	P70268_S536	TB_02H-MOCK_00H	0.994465	0.0170078	0.179687	no	0.994465	0.0170078
P70268	Pkn1	protein kinase N1	320795	P70268_S536;P70268_S540	TB_02H-MOCK_00H	0.510098	0.220701	0.647868	no	0.510098	0.220701
P70268	Pkn1	protein kinase N1	320795	P70268_S540	TB_02H-MOCK_00H	1.23274	0.0183191	0.18716	no	1.23274	0.0183191
P70268	Pkn1	protein kinase N1	320795	P70268_S920	TB_02H-MOCK_00H	-0.0357424	0.93764	0.981534	no	-0.0357424	0.93764
P70268	Pkn1	protein kinase N1	320795	P70268_T532;P70268_S540	TB_02H-MOCK_00H	0.229126	0.528757	0.856055	no	0.229126	0.528757
P70268	Pkn1	protein kinase N1	320795	P70268_T534;P70268_S540	TB_02H-MOCK_00H	0.176758	0.569006	0.867995	no	0.176758	0.569006
P70268	Pkn1	protein kinase N1	320795	P70268_T776	TB_02H-MOCK_00H	0.243492	0.549421	0.861164	no	0.243492	0.549421
P70268	Pkn1	protein kinase N1	320795	P70268_T918	TB_02H-MOCK_00H	0.331539	0.412875	0.808847	no	0.331539	0.412875
P70271	Pdlim4	PDZ and LIM domain 4	30794	P70271_S111	TB_02H-MOCK_00H	-0.839839	0.0979706	0.44712	no	-0.839839	0.0979706
P70271	Pdlim4	PDZ and LIM domain 4	30794	P70271_S119	TB_02H-MOCK_00H	-0.152222	0.748115	0.936139	no	-0.152222	0.748115
P70271	Pdlim4	PDZ and LIM domain 4	30794	P70271_S121	TB_02H-MOCK_00H	-0.278531	0.295936	0.722141	no	-0.278531	0.295936
P70288	Hdac2	histone deacetylase 2	15182	P70288_S394	TB_02H-MOCK_00H	-0.544192	0.61114	0.887197	no	-0.544192	0.61114
P70290	Mpp1	membrane protein, palmitoylated	17524	P70290_S110	TB_02H-MOCK_00H	1.11471	0.162453	0.569942	no	1.11471	0.162453
P70290	Mpp1	membrane protein, palmitoylated	17524	P70290_S237	TB_02H-MOCK_00H	0.704624	0.0199149	0.196189	no	0.704624	0.0199149
P70290	Mpp1	membrane protein, palmitoylated	17524	P70290_S241	TB_02H-MOCK_00H	-1.05302	0.135486	0.514644	no	-1.05302	0.135486
P70290	Mpp1	membrane protein, palmitoylated	17524	P70290_S243	TB_02H-MOCK_00H	1.08102	0.18264	0.600012	no	1.08102	0.18264
P70290	Mpp1	membrane protein, palmitoylated	17524	P70290_S40;P70290_S57	TB_02H-MOCK_00H	0.288304	0.630625	0.897073	no	0.288304	0.630625
P70290	Mpp1	membrane protein, palmitoylated	17524	P70290_S5	TB_02H-MOCK_00H	-0.166305	0.716154	0.924149	no	-0.166305	0.716154
P70290	Mpp1	membrane protein, palmitoylated	17524	P70290_S52;P70290_S57	TB_02H-MOCK_00H	-0.283819	0.654047	0.904081	no	-0.283819	0.654047
P70290	Mpp1	membrane protein, palmitoylated	17524	P70290_S57	TB_02H-MOCK_00H	1.07931	0.15568	0.555158	no	1.07931	0.15568
P70290	Mpp1	membrane protein, palmitoylated	17524	P70290_T2	TB_02H-MOCK_00H	-0.20414	0.470497	0.828419	no	-0.20414	0.470497
P70290	Mpp1	membrane protein, palmitoylated	17524	P70290_T2;P70290_S5	TB_02H-MOCK_00H	0.830131	0.198064	0.618819	no	0.830131	0.198064
P70290	Mpp1	membrane protein, palmitoylated	17524	P70290_T43;P70290_S57	TB_02H-MOCK_00H	0.457419	0.554981	0.863481	no	0.457419	0.554981
P70295	P70295			P70295_S290	TB_02H-MOCK_00H	0.559429	0.00119621	0.0353862	no	0.559429	0.00119621
P70302	Stim1	stromal interaction molecule 1	20866	P70302_S257	TB_02H-MOCK_00H	0.343649	0.255397	0.685604	no	0.343649	0.255397
P70302	Stim1	stromal interaction molecule 1	20866	P70302_S519	TB_02H-MOCK_00H	0.222069	0.721523	0.925985	no	0.222069	0.721523
P70302	Stim1	stromal interaction molecule 1	20866	P70302_S519;P70302_S521	TB_02H-MOCK_00H	-0.642347	0.356204	0.775831	no	-0.642347	0.356204
P70302	Stim1	stromal interaction molecule 1	20866	P70302_S523;P70302_S528	TB_02H-MOCK_00H	-0.728253	0.279463	0.707407	no	-0.728253	0.279463
P70302	Stim1	stromal interaction molecule 1	20866	P70302_S575	TB_02H-MOCK_00H	0.954615	0.0787379	0.400961	no	0.954615	0.0787379
P70302	Stim1	stromal interaction molecule 1	20866	P70302_S660	TB_02H-MOCK_00H	0.305838	0.375173	0.792126	no	0.305838	0.375173
P70335	Rock1	Rho-associated coiled-coil containing protein kinase 1	19877	P70335_S1098	TB_02H-MOCK_00H	0.207634	0.635897	0.899265	no	0.207634	0.635897
P70335	Rock1	Rho-associated coiled-coil containing protein kinase 1	19877	P70335_S1098;P70335_S1100	TB_02H-MOCK_00H	-0.789664	0.384171	0.79671	no	-0.789664	0.384171
P70335	Rock1	Rho-associated coiled-coil containing protein kinase 1	19877	P70335_S1100;P70335_T1101	TB_02H-MOCK_00H	#NUM!		0	yes	7.23271	0.0277323
P70335	Rock1	Rho-associated coiled-coil containing protein kinase 1	19877	P70335_S1341	TB_02H-MOCK_00H	-0.5903	0.395438	0.805175	no	-0.5903	0.395438
P70336	Rock2	Rho-associated coiled-coil containing protein kinase 2	19878	P70336_S1361	TB_02H-MOCK_00H	0.470527	0.525037	0.853903	no	0.470527	0.525037
P70336	Rock2	Rho-associated coiled-coil containing protein kinase 2	19878	P70336_S1362	TB_02H-MOCK_00H	0.999018	0.0580263	0.344855	no	0.999018	0.0580263
P70372	Elavl1	ELAV (embryonic lethal, abnormal vision)-like 1 (Hu antigen R)	15568	P70372_Y95;P70372_S99;P70372_S100	TB_02H-MOCK_00H	0.824286	0.474438	0.828419	no	0.824286	0.474438
P70399	Trp53bp1	transformation related protein 53 binding protein 1	27223	P70399_S1103	TB_02H-MOCK_00H	0.854143	0.158258	0.560972	no	0.854143	0.158258
P70399	Trp53bp1	transformation related protein 53 binding protein 1	27223	P70399_S1347	TB_02H-MOCK_00H	#NUM!		0	yes	8.60968	0.0237466
P70399	Trp53bp1	transformation related protein 53 binding protein 1	27223	P70399_S1445	TB_02H-MOCK_00H	1.00724	0.0311286	0.249328	no	1.00724	0.0311286
P70399	Trp53bp1	transformation related protein 53 binding protein 1	27223	P70399_S1447	TB_02H-MOCK_00H	0.0961745	0.76237	0.940926	no	0.0961745	0.76237
P70399	Trp53bp1	transformation related protein 53 binding protein 1	27223	P70399_S256	TB_02H-MOCK_00H	#NUM!		0	yes	-10.6828	0.0427518
P70399	Trp53bp1	transformation related protein 53 binding protein 1	27223	P70399_S261	TB_02H-MOCK_00H	-0.0911798	0.647104	0.902038	no	-0.0911798	0.647104
P70399	Trp53bp1	transformation related protein 53 binding protein 1	27223	P70399_S262	TB_02H-MOCK_00H	-0.567598	0.104146	0.462742	no	-0.567598	0.104146
P70399	Trp53bp1	transformation related protein 53 binding protein 1	27223	P70399_T1199;P70399_S1201	TB_02H-MOCK_00H	0.630524	0.724801	0.928361	no	0.630524	0.724801
P70429	Evl	Ena-vasodilator stimulated phosphoprotein	14026	P70429_S246	TB_02H-MOCK_00H	0.629779	0.142556	0.528636	no	0.629779	0.142556
P70429	Evl	Ena-vasodilator stimulated phosphoprotein	14026	P70429_S251	TB_02H-MOCK_00H	#NUM!		0	yes	7.93442	0.0333707
P70429	Evl	Ena-vasodilator stimulated phosphoprotein	14026	P70429_S257	TB_02H-MOCK_00H	1.31536	0.0128746	0.156321	no	1.31536	0.0128746
P70429	Evl	Ena-vasodilator stimulated phosphoprotein	14026	P70429_S258	TB_02H-MOCK_00H	1.20453	0.0306883	0.247484	no	1.20453	0.0306883
P70429	Evl	Ena-vasodilator stimulated phosphoprotein	14026	P70429_S329	TB_02H-MOCK_00H	0.23296	0.229894	0.659816	no	0.23296	0.229894
P70429	Evl	Ena-vasodilator stimulated phosphoprotein	14026	P70429_S343	TB_02H-MOCK_00H	0.388676	0.168232	0.578645	no	0.388676	0.168232
P70429	Evl	Ena-vasodilator stimulated phosphoprotein	14026	P70429_S343;P70429_S347	TB_02H-MOCK_00H	1.64172	9.50185e-08	4.75677e-05	no	1.64172	9.50185e-08
P70429	Evl	Ena-vasodilator stimulated phosphoprotein	14026	P70429_S343;P70429_S352	TB_02H-MOCK_00H	0.921311	0.105586	0.465551	no	0.921311	0.105586
P70429	Evl	Ena-vasodilator stimulated phosphoprotein	14026	P70429_S347	TB_02H-MOCK_00H	1.99783	7.0062e-07	0.000253313	no	1.99783	7.0062e-07
P70429	Evl	Ena-vasodilator stimulated phosphoprotein	14026	P70429_S347;P70429_S352	TB_02H-MOCK_00H	2.24436	0.000876378	0.028235	no	2.24436	0.000876378
P70429	Evl	Ena-vasodilator stimulated phosphoprotein	14026	P70429_S352	TB_02H-MOCK_00H	#NUM!		0	yes	5.32419	0.0196612
P70429	Evl	Ena-vasodilator stimulated phosphoprotein	14026	P70429_S367	TB_02H-MOCK_00H	-0.162692	0.602635	0.883476	no	-0.162692	0.602635
P70441	Slc9a3r1	solute carrier family 9 (sodium/hydrogen exchanger), member 3 regulator 1	26941	P70441_S273	TB_02H-MOCK_00H	-0.112927	0.784911	0.948298	no	-0.112927	0.784911
P70441	Slc9a3r1	solute carrier family 9 (sodium/hydrogen exchanger), member 3 regulator 1	26941	P70441_S275	TB_02H-MOCK_00H	0.137869	0.830924	0.959836	no	0.137869	0.830924
P70441	Slc9a3r1	solute carrier family 9 (sodium/hydrogen exchanger), member 3 regulator 1	26941	P70441_S285	TB_02H-MOCK_00H	0.44182	0.439901	0.816002	no	0.44182	0.439901
P70441	Slc9a3r1	solute carrier family 9 (sodium/hydrogen exchanger), member 3 regulator 1	26941	P70441_S285;P70441_S286	TB_02H-MOCK_00H	-0.318195	0.74417	0.934953	no	-0.318195	0.74417
P70441	Slc9a3r1	solute carrier family 9 (sodium/hydrogen exchanger), member 3 regulator 1	26941	P70441_S285;P70441_S289	TB_02H-MOCK_00H	1.15287	0.117033	0.486545	no	1.15287	0.117033
P70441	Slc9a3r1	solute carrier family 9 (sodium/hydrogen exchanger), member 3 regulator 1	26941	P70441_S286	TB_02H-MOCK_00H	0.594505	0.771959	0.944522	no	0.594505	0.771959
P70441	Slc9a3r1	solute carrier family 9 (sodium/hydrogen exchanger), member 3 regulator 1	26941	P70441_S286;P70441_S294	TB_02H-MOCK_00H	-1.55345	0.27362	0.7019	no	-1.55345	0.27362
P70445	Eif4ebp2	eukaryotic translation initiation factor 4E binding protein 2	13688	P70445_S25;P70445_T50	TB_02H-MOCK_00H	#NUM!		0	yes	-6.13987	0.0374597
P70445	Eif4ebp2	eukaryotic translation initiation factor 4E binding protein 2	13688	P70445_T41;P70445_T45	TB_02H-MOCK_00H	-0.610765	0.247018	0.677636	no	-0.610765	0.247018
P70452	Stx4a	syntaxin 4A (placental)	20909	P70452_S117	TB_02H-MOCK_00H	0.633106	0.0605767	0.352309	no	0.633106	0.0605767
P70452	Stx4a	syntaxin 4A (placental)	20909	P70452_S15	TB_02H-MOCK_00H	0.490578	0.451828	0.822286	no	0.490578	0.451828
P70452	Stx4a	syntaxin 4A (placental)	20909	P70452_S36	TB_02H-MOCK_00H	1.94359	2.82861e-08	3.0681e-05	no	1.94359	2.82861e-08
P70459	Erf	Ets2 repressor factor	13875	P70459_S524	TB_02H-MOCK_00H	1.20552	0.0368213	0.273554	no	1.20552	0.0368213
P70460	Vasp	vasodilator-stimulated phosphoprotein	22323	P70460_S235	TB_02H-MOCK_00H	-0.232448	0.669096	0.910071	no	-0.232448	0.669096
P70460	Vasp	vasodilator-stimulated phosphoprotein	22323	P70460_S317	TB_02H-MOCK_00H	0.127435	0.804109	0.953773	no	0.127435	0.804109
P70460	Vasp	vasodilator-stimulated phosphoprotein	22323	P70460_S319	TB_02H-MOCK_00H	#NUM!		0	yes	8.12121	0.0174662
P70658	Cxcr4	chemokine (C-X-C motif) receptor 4	12767	P70658_S328	TB_02H-MOCK_00H	0.199233	0.555953	0.863481	no	0.199233	0.555953
P70658	Cxcr4	chemokine (C-X-C motif) receptor 4	12767	P70658_S332	TB_02H-MOCK_00H	0.342491	0.139501	0.523268	no	0.342491	0.139501
P70671	Irf3	interferon regulatory factor 3	54131	P70671_S135	TB_02H-MOCK_00H	0.294954	0.224503	0.653166	no	0.294954	0.224503
P70704	Atp8a1	ATPase, aminophospholipid transporter (APLT), class I, type 8A, member 1	11980	P70704_S25;P70704_S29	TB_02H-MOCK_00H	-0.230563	0.50386	0.844695	no	-0.230563	0.50386
P70704	Atp8a1	ATPase, aminophospholipid transporter (APLT), class I, type 8A, member 1	11980	P70704_S29	TB_02H-MOCK_00H	1.28864	0.0779021	0.400961	no	1.28864	0.0779021
P81122	Irs2	insulin receptor substrate 2	384783	P81122_S1089	TB_02H-MOCK_00H	0.34228	0.752845	0.938321	no	0.34228	0.752845
P81122	Irs2	insulin receptor substrate 2	384783	P81122_S1163	TB_02H-MOCK_00H	0.999554	0.0290649	0.240528	no	0.999554	0.0290649
P81122	Irs2	insulin receptor substrate 2	384783	P81122_S303	TB_02H-MOCK_00H	0.382698	0.5225	0.852879	no	0.382698	0.5225
P81122	Irs2	insulin receptor substrate 2	384783	P81122_S556	TB_02H-MOCK_00H	-0.42988	0.407781	0.808358	no	-0.42988	0.407781
P81122	Irs2	insulin receptor substrate 2	384783	P81122_S573	TB_02H-MOCK_00H	0.697221	0.00420132	0.080894	no	0.697221	0.00420132
P82343	Renbp	renin binding protein	19703	P82343_S419	TB_02H-MOCK_00H	-0.529413	0.026712	0.229041	no	-0.529413	0.026712
P82343	Renbp	renin binding protein	19703	P82343_S429	TB_02H-MOCK_00H	-0.212691	0.578208	0.871353	no	-0.212691	0.578208
P83093	Stim2	stromal interaction molecule 2	116873	P83093_S518;P83093_S522	TB_02H-MOCK_00H	0.0131665	0.985595	0.995976	no	0.0131665	0.985595
P83093	Stim2	stromal interaction molecule 2	116873	P83093_S718	TB_02H-MOCK_00H	0.124979	0.767804	0.943321	no	0.124979	0.767804
P83741	Wnk1	WNK lysine deficient protein kinase 1	232341	P83741_S1256	TB_02H-MOCK_00H	-0.485557	0.225793	0.654509	no	-0.485557	0.225793
P83741	Wnk1	WNK lysine deficient protein kinase 1	232341	P83741_S168	TB_02H-MOCK_00H	-0.145555	0.675955	0.91037	no	-0.145555	0.675955
P83741	Wnk1	WNK lysine deficient protein kinase 1	232341	P83741_S181;P83741_S183	TB_02H-MOCK_00H	0.199214	0.75382	0.938921	no	0.199214	0.75382
P83741	Wnk1	WNK lysine deficient protein kinase 1	232341	P83741_S181;P83741_S185	TB_02H-MOCK_00H	-0.608002	0.674254	0.91037	no	-0.608002	0.674254
P83741	Wnk1	WNK lysine deficient protein kinase 1	232341	P83741_S183;P83741_S185	TB_02H-MOCK_00H	-1.93265	0.424311	0.810326	no	-1.93265	0.424311
P83741	Wnk1	WNK lysine deficient protein kinase 1	232341	P83741_S185	TB_02H-MOCK_00H	-0.995735	0.275442	0.704075	no	-0.995735	0.275442
P83741	Wnk1	WNK lysine deficient protein kinase 1	232341	P83741_S2	TB_02H-MOCK_00H	-0.248159	0.63174	0.897678	no	-0.248159	0.63174
P83741	Wnk1	WNK lysine deficient protein kinase 1	232341	P83741_S2006	TB_02H-MOCK_00H	-0.38888	0.177539	0.592012	no	-0.38888	0.177539
P83741	Wnk1	WNK lysine deficient protein kinase 1	232341	P83741_S2007	TB_02H-MOCK_00H	0.435242	0.401764	0.805493	no	0.435242	0.401764
P83741	Wnk1	WNK lysine deficient protein kinase 1	232341	P83741_S2022;P83741_S2027	TB_02H-MOCK_00H	0.418264	0.714111	0.922887	no	0.418264	0.714111
P83741	Wnk1	WNK lysine deficient protein kinase 1	232341	P83741_S2024;P83741_S2027	TB_02H-MOCK_00H	0.561144	0.652244	0.903543	no	0.561144	0.652244
P83741	Wnk1	WNK lysine deficient protein kinase 1	232341	P83741_S2027	TB_02H-MOCK_00H	0.593435	0.312563	0.739493	no	0.593435	0.312563
P83741	Wnk1	WNK lysine deficient protein kinase 1	232341	P83741_S2265	TB_02H-MOCK_00H	-1.63171	0.584413	0.875367	no	-1.63171	0.584413
P83741	Wnk1	WNK lysine deficient protein kinase 1	232341	P83741_S2281	TB_02H-MOCK_00H	-1.00915	0.0651889	0.366048	no	-1.00915	0.0651889
P83741	Wnk1	WNK lysine deficient protein kinase 1	232341	P83741_S2367	TB_02H-MOCK_00H	-0.480526	0.224003	0.652585	no	-0.480526	0.224003
P83741	Wnk1	WNK lysine deficient protein kinase 1	232341	P83741_T1972	TB_02H-MOCK_00H	#NUM!		0	yes	5.78464	0.0165479
P84104	Srsf3	serine/arginine-rich splicing factor 3	20383	P84104_S5	TB_02H-MOCK_00H	-0.50079	0.282113	0.710902	no	-0.50079	0.282113
P97287	Mcl1	myeloid cell leukemia sequence 1	17210	P97287_S140	TB_02H-MOCK_00H	0.287278	0.393582	0.803813	no	0.287278	0.393582
P97287	Mcl1	myeloid cell leukemia sequence 1	17210	P97287_S140;P97287_S143	TB_02H-MOCK_00H	#NUM!		0	yes	5.2982	0.0472753
P97287	Mcl1	myeloid cell leukemia sequence 1	17210	P97287_S143	TB_02H-MOCK_00H	#NUM!		0	yes	9.67732	0.024331
P97300	Nptn	neuroplastin	20320	P97300_T91	TB_02H-MOCK_00H	-0.714328	0.0447773	0.307459	no	-0.714328	0.0447773
P97302	Bach1	BTB and CNC homology 1, basic leucine zipper transcription factor 1	12013	P97302_S448	TB_02H-MOCK_00H	-0.129329	0.580549	0.873224	no	-0.129329	0.580549
P97310	Mcm2	minichromosome maintenance complex component 2	17216	P97310_S11	TB_02H-MOCK_00H	-0.789892	0.338799	0.761888	no	-0.789892	0.338799
P97310	Mcm2	minichromosome maintenance complex component 2	17216	P97310_S12	TB_02H-MOCK_00H	-0.394782	0.136402	0.515807	no	-0.394782	0.136402
P97310	Mcm2	minichromosome maintenance complex component 2	17216	P97310_S139	TB_02H-MOCK_00H	-0.418449	0.558348	0.863519	no	-0.418449	0.558348
P97310	Mcm2	minichromosome maintenance complex component 2	17216	P97310_S139;P97310_S140	TB_02H-MOCK_00H	-0.638928	0.425417	0.810891	no	-0.638928	0.425417
P97310	Mcm2	minichromosome maintenance complex component 2	17216	P97310_S21	TB_02H-MOCK_00H	-0.0940864	0.827098	0.959836	no	-0.0940864	0.827098
P97310	Mcm2	minichromosome maintenance complex component 2	17216	P97310_S21;P97310_S26	TB_02H-MOCK_00H	-0.420295	0.289401	0.717039	no	-0.420295	0.289401
P97310	Mcm2	minichromosome maintenance complex component 2	17216	P97310_S21;P97310_S27	TB_02H-MOCK_00H	-0.668294	0.582289	0.874191	no	-0.668294	0.582289
P97310	Mcm2	minichromosome maintenance complex component 2	17216	P97310_S26	TB_02H-MOCK_00H	#NUM!		0	yes	-10.5285	0.0496267
P97310	Mcm2	minichromosome maintenance complex component 2	17216	P97310_S27	TB_02H-MOCK_00H	-0.131722	0.81941	0.958778	no	-0.131722	0.81941
P97310	Mcm2	minichromosome maintenance complex component 2	17216	P97310_S4;P97310_S12	TB_02H-MOCK_00H	#NUM!		0	yes	-4.73204	0.0121286
P97310	Mcm2	minichromosome maintenance complex component 2	17216	P97310_S9	TB_02H-MOCK_00H	0.229674	0.558445	0.863519	no	0.229674	0.558445
P97310	Mcm2	minichromosome maintenance complex component 2	17216	P97310_S9;P97310_S11	TB_02H-MOCK_00H	-0.714576	0.350204	0.771412	no	-0.714576	0.350204
P97310	Mcm2	minichromosome maintenance complex component 2	17216	P97310_Y137;P97310_S139	TB_02H-MOCK_00H	-0.664913	0.469661	0.828362	no	-0.664913	0.469661
P97311	Mcm6	minichromosome maintenance complex component 6	17219	P97311_S699	TB_02H-MOCK_00H	0.437295	0.0821172	0.408359	no	0.437295	0.0821172
P97351	Rps3a1	ribosomal protein S3A1	20091	P97351_S263	TB_02H-MOCK_00H	-0.125505	0.621234	0.89161	no	-0.125505	0.621234
P97360	Etv6	ets variant 6	14011	P97360_S215	TB_02H-MOCK_00H	0.362058	0.456575	0.823788	no	0.362058	0.456575
P97360	Etv6	ets variant 6	14011	P97360_S238	TB_02H-MOCK_00H	-0.0218271	0.954582	0.985636	no	-0.0218271	0.954582
P97360	Etv6	ets variant 6	14011	P97360_S240	TB_02H-MOCK_00H	-0.607155	0.204357	0.627248	no	-0.607155	0.204357
P97360	Etv6	ets variant 6	14011	P97360_S29	TB_02H-MOCK_00H	-0.179504	0.691421	0.916523	no	-0.179504	0.691421
P97360	Etv6	ets variant 6	14011	P97360_T18;P97360_S22	TB_02H-MOCK_00H	0.529664	0.224013	0.652585	no	0.529664	0.224013
P97360	Etv6	ets variant 6	14011	P97360_Y17;P97360_S22	TB_02H-MOCK_00H	-0.412683	0.171496	0.583281	no	-0.412683	0.171496
P97366	P97366			P97366_S689	TB_02H-MOCK_00H	1.04499	0.0261494	0.226907	no	1.04499	0.0261494
P97372	Psme2	proteasome (prosome, macropain) activator subunit 2 (PA28 beta)	19188	P97372_S10	TB_02H-MOCK_00H	0.060003	0.817639	0.957911	no	0.060003	0.817639
P97379	G3bp2	GTPase activating protein (SH3 domain) binding protein 2	23881	P97379_S225	TB_02H-MOCK_00H	-0.0634544	0.805171	0.953773	no	-0.0634544	0.805171
P97412	Lyst	lysosomal trafficking regulator	17101	P97412_S2097	TB_02H-MOCK_00H	-0.0913172	0.881844	0.970182	no	-0.0913172	0.881844
P97412	Lyst	lysosomal trafficking regulator	17101	P97412_S2099	TB_02H-MOCK_00H	-0.126742	0.361287	0.779853	no	-0.126742	0.361287
P97412	Lyst	lysosomal trafficking regulator	17101	P97412_S2229	TB_02H-MOCK_00H	0.157783	0.657577	0.905348	no	0.157783	0.657577
P97412	Lyst	lysosomal trafficking regulator	17101	P97412_S2614	TB_02H-MOCK_00H	-0.781581	0.159919	0.565014	no	-0.781581	0.159919
P97412	Lyst	lysosomal trafficking regulator	17101	P97412_T3389;P97412_T3393;P97412_T3404;P97412_S3408	TB_02H-MOCK_00H	1.77927	0.0974896	0.445859	no	1.77927	0.0974896
P97429	Anxa4	annexin A4	11746	P97429_S12	TB_02H-MOCK_00H	0.112322	0.686918	0.915686	no	0.112322	0.686918
P97434	Mprip	myosin phosphatase Rho interacting protein	26936	P97434_S992	TB_02H-MOCK_00H	0.991599	0.187084	0.604026	no	0.991599	0.187084
P97452	Bop1	block of proliferation 1	12181	P97452_S11	TB_02H-MOCK_00H	-0.701054	0.146252	0.535926	no	-0.701054	0.146252
P97465	Dok1	docking protein 1	13448	P97465_S269	TB_02H-MOCK_00H	0.117547	0.797771	0.952193	no	0.117547	0.797771
P97465	Dok1	docking protein 1	13448	P97465_S48	TB_02H-MOCK_00H	-1.55703	0.141344	0.526841	no	-1.55703	0.141344
P97465	Dok1	docking protein 1	13448	P97465_T267	TB_02H-MOCK_00H	1.05673	0.283879	0.713143	no	1.05673	0.283879
P97484	Pirb	paired Ig-like receptor B	18733	P97484_S2;P97484_T4	TB_02H-MOCK_00H	0.149803	0.75484	0.939806	no	0.149803	0.75484
P97484	Pirb	paired Ig-like receptor B	18733	P97484_S684	TB_02H-MOCK_00H	-0.839643	0.145386	0.534257	no	-0.839643	0.145386
P97484	Pirb	paired Ig-like receptor B	18733	P97484_S757	TB_02H-MOCK_00H	0.714554	0.477092	0.828419	no	0.714554	0.477092
P97492	Rgs14	regulator of G-protein signaling 14	51791	P97492_S199	TB_02H-MOCK_00H	-0.633241	0.568839	0.867995	no	-0.633241	0.568839
P97492	Rgs14	regulator of G-protein signaling 14	51791	P97492_S20	TB_02H-MOCK_00H	-0.619409	0.174845	0.58897	no	-0.619409	0.174845
P97492	Rgs14	regulator of G-protein signaling 14	51791	P97492_S289	TB_02H-MOCK_00H	-0.378059	0.511338	0.846082	no	-0.378059	0.511338
P97492	Rgs14	regulator of G-protein signaling 14	51791	P97492_S458	TB_02H-MOCK_00H	-0.640708	0.146968	0.537343	no	-0.640708	0.146968
P97496	Smarcc1	SWI/SNF related, matrix associated, actin dependent regulator of chromatin, subfamily c, member 1	20588	P97496_S327;P97496_S329	TB_02H-MOCK_00H	0.317692	0.59722	0.881539	no	0.317692	0.59722
P97797	Sirpa	signal-regulatory protein alpha	19261	P97797_S406	TB_02H-MOCK_00H	0.683662	0.364139	0.782588	no	0.683662	0.364139
P97797	Sirpa	signal-regulatory protein alpha	19261	P97797_S408	TB_02H-MOCK_00H	0.427223	0.651154	0.903543	no	0.427223	0.651154
P97797	Sirpa	signal-regulatory protein alpha	19261	P97797_T407	TB_02H-MOCK_00H	2.80993	0.0817448	0.408359	no	2.80993	0.0817448
P97801	Smn1	survival motor neuron 1	20595	P97801_S10	TB_02H-MOCK_00H	-0.0748602	0.704166	0.92054	no	-0.0748602	0.704166
P97801	Smn1	survival motor neuron 1	20595	P97801_S25	TB_02H-MOCK_00H	-0.284223	0.535641	0.858235	no	-0.284223	0.535641
P97801	Smn1	survival motor neuron 1	20595	P97801_S25;P97801_S28	TB_02H-MOCK_00H	-1.02139	0.15765	0.559731	no	-1.02139	0.15765
P97801	Smn1	survival motor neuron 1	20595	P97801_S28;P97801_T34	TB_02H-MOCK_00H	0.453326	0.706144	0.921144	no	0.453326	0.706144
P97801	Smn1	survival motor neuron 1	20595	P97801_S5	TB_02H-MOCK_00H	-0.109311	0.710513	0.922887	no	-0.109311	0.710513
P97801	Smn1	survival motor neuron 1	20595	P97801_S5;P97801_S10	TB_02H-MOCK_00H	-0.427175	0.405843	0.80704	no	-0.427175	0.405843
P97801	Smn1	survival motor neuron 1	20595	P97801_T22;P97801_S28	TB_02H-MOCK_00H	#NUM!		0	yes	6.63353	0.0289723
P97814	Pstpip1	proline-serine-threonine phosphatase-interacting protein 1	19200	P97814_S312	TB_02H-MOCK_00H	-1.74606	0.00770368	0.115254	no	-1.74606	0.00770368
P97814	Pstpip1	proline-serine-threonine phosphatase-interacting protein 1	19200	P97814_S312;P97814_S318	TB_02H-MOCK_00H	1.795	0.106961	0.468133	no	1.795	0.106961
P97814	Pstpip1	proline-serine-threonine phosphatase-interacting protein 1	19200	P97814_S318	TB_02H-MOCK_00H	0.479684	0.285678	0.715901	no	0.479684	0.285678
P97820	Map4k4	mitogen-activated protein kinase kinase kinase kinase 4	26921	P97820_S556	TB_02H-MOCK_00H	-0.458712	0.438424	0.816002	no	-0.458712	0.438424
P97820	Map4k4	mitogen-activated protein kinase kinase kinase kinase 4	26921	P97820_S619	TB_02H-MOCK_00H	#NUM!		0	yes	7.02661	0.0321957
P97820	Map4k4	mitogen-activated protein kinase kinase kinase kinase 4	26921	P97820_S621	TB_02H-MOCK_00H	0.908888	0.0705615	0.37957	no	0.908888	0.0705615
P97820	Map4k4	mitogen-activated protein kinase kinase kinase kinase 4	26921	P97820_S625	TB_02H-MOCK_00H	1.57115	0.0956769	0.442318	no	1.57115	0.0956769
P97820	Map4k4	mitogen-activated protein kinase kinase kinase kinase 4	26921	P97820_S629	TB_02H-MOCK_00H	-0.0416899	0.949797	0.984209	no	-0.0416899	0.949797
P97820	Map4k4	mitogen-activated protein kinase kinase kinase kinase 4	26921	P97820_S646	TB_02H-MOCK_00H	1.34638	0.0480699	0.314007	no	1.34638	0.0480699
P97820	Map4k4	mitogen-activated protein kinase kinase kinase kinase 4	26921	P97820_S794	TB_02H-MOCK_00H	0.906174	0.271424	0.699852	no	0.906174	0.271424
P97820	Map4k4	mitogen-activated protein kinase kinase kinase kinase 4	26921	P97820_S846	TB_02H-MOCK_00H	-0.928636	0.252026	0.68418	no	-0.928636	0.252026
P97820	Map4k4	mitogen-activated protein kinase kinase kinase kinase 4	26921	P97820_S894	TB_02H-MOCK_00H	-0.383923	0.192317	0.610126	no	-0.383923	0.192317
P97855	G3bp1	GTPase activating protein (SH3 domain) binding protein 1	27041	P97855_S149	TB_02H-MOCK_00H	0.147164	0.749548	0.936647	no	0.147164	0.749548
P97855	G3bp1	GTPase activating protein (SH3 domain) binding protein 1	27041	P97855_S229	TB_02H-MOCK_00H	5.02657	0.00122245	0.0355292	no	5.02657	0.00122245
P97855	G3bp1	GTPase activating protein (SH3 domain) binding protein 1	27041	P97855_S231	TB_02H-MOCK_00H	-0.0693851	0.739628	0.932307	no	-0.0693851	0.739628
P97864	Casp7	caspase 7	12369	P97864_T2	TB_02H-MOCK_00H	0.0863767	0.840747	0.960754	no	0.0863767	0.840747
P97868	Rbbp6	retinoblastoma binding protein 6, ubiquitin ligase	19647	P97868_S1179	TB_02H-MOCK_00H	-0.0178944	0.954273	0.985636	no	-0.0178944	0.954273
P97868	Rbbp6	retinoblastoma binding protein 6, ubiquitin ligase	19647	P97868_S1271	TB_02H-MOCK_00H	0.441216	0.463521	0.825445	no	0.441216	0.463521
P97868	Rbbp6	retinoblastoma binding protein 6, ubiquitin ligase	19647	P97868_S361	TB_02H-MOCK_00H	0.332388	0.250621	0.682729	no	0.332388	0.250621
P97868	Rbbp6	retinoblastoma binding protein 6, ubiquitin ligase	19647	P97868_S874	TB_02H-MOCK_00H	0.170103	0.694366	0.918022	no	0.170103	0.694366
P97929	Brca2	breast cancer 2, early onset	12190	P97929_S2883	TB_02H-MOCK_00H	0.729993	0.24435	0.675675	no	0.729993	0.24435
P98064	Masp1	mannan-binding lectin serine peptidase 1	17174	P98064_Y688;P98064_Y690	TB_02H-MOCK_00H	-0.587627	0.207753	0.631225	no	-0.587627	0.207753
P98078	Dab2	disabled 2, mitogen-responsive phosphoprotein	13132	P98078_S2	TB_02H-MOCK_00H	-0.151773	0.713088	0.922887	no	-0.151773	0.713088
P98078	Dab2	disabled 2, mitogen-responsive phosphoprotein	13132	P98078_S24	TB_02H-MOCK_00H	1.67127	0.00141751	0.0392559	no	1.67127	0.00141751
P98078	Dab2	disabled 2, mitogen-responsive phosphoprotein	13132	P98078_S32	TB_02H-MOCK_00H	#NUM!		0	yes	5.46782	0.011374
P98078	Dab2	disabled 2, mitogen-responsive phosphoprotein	13132	P98078_S323	TB_02H-MOCK_00H	-0.349596	0.538058	0.859097	no	-0.349596	0.538058
P98078	Dab2	disabled 2, mitogen-responsive phosphoprotein	13132	P98078_S325	TB_02H-MOCK_00H	0.27588	0.546351	0.860369	no	0.27588	0.546351
P98078	Dab2	disabled 2, mitogen-responsive phosphoprotein	13132	P98078_S325;P98078_S326	TB_02H-MOCK_00H	2.10506	0.186944	0.604026	no	2.10506	0.186944
P98078	Dab2	disabled 2, mitogen-responsive phosphoprotein	13132	P98078_S328	TB_02H-MOCK_00H	0.960189	0.357701	0.77668	no	0.960189	0.357701
P98078	Dab2	disabled 2, mitogen-responsive phosphoprotein	13132	P98078_S393	TB_02H-MOCK_00H	#NUM!		0	yes	-4.45737	0.0136751
P98078	Dab2	disabled 2, mitogen-responsive phosphoprotein	13132	P98078_S401	TB_02H-MOCK_00H	1.06765	0.000703813	0.0245458	no	1.06765	0.000703813
P98078	Dab2	disabled 2, mitogen-responsive phosphoprotein	13132	P98078_S727	TB_02H-MOCK_00H	-0.0497281	0.896594	0.972932	no	-0.0497281	0.896594
P98078	Dab2	disabled 2, mitogen-responsive phosphoprotein	13132	P98078_S741	TB_02H-MOCK_00H	-0.2541	0.695907	0.918022	no	-0.2541	0.695907
P98078	Dab2	disabled 2, mitogen-responsive phosphoprotein	13132	P98078_S749	TB_02H-MOCK_00H	#NUM!		0	yes	-7.58005	0.0374679
P98078	Dab2	disabled 2, mitogen-responsive phosphoprotein	13132	P98078_S753	TB_02H-MOCK_00H	1.58083	0.0767243	0.398434	no	1.58083	0.0767243
P98078	Dab2	disabled 2, mitogen-responsive phosphoprotein	13132	P98078_S759	TB_02H-MOCK_00H	2.95788	0.0373553	0.276683	no	2.95788	0.0373553
P98078	Dab2	disabled 2, mitogen-responsive phosphoprotein	13132	P98078_T671	TB_02H-MOCK_00H	-0.848982	0.211801	0.635999	no	-0.848982	0.211801
P98078	Dab2	disabled 2, mitogen-responsive phosphoprotein	13132	P98078_T725;P98078_S731	TB_02H-MOCK_00H	0.761717	0.0346931	0.263457	no	0.761717	0.0346931
P98083	Shc1	src homology 2 domain-containing transforming protein C1	20416	P98083_S139	TB_02H-MOCK_00H	1.34362	0.0591286	0.346987	no	1.34362	0.0591286
Q00196	Pou2f2	POU domain, class 2, transcription factor 2	18987	Q00196_S55	TB_02H-MOCK_00H	0.24754	0.378962	0.793828	no	0.24754	0.378962
Q00519	Xdh	xanthine dehydrogenase	22436	Q00519_T664	TB_02H-MOCK_00H	#NUM!		0	yes	10.084	0.0110109
Q00612	G6pdx	glucose-6-phosphate dehydrogenase X-linked	14381	Q00612_Y401	TB_02H-MOCK_00H	0.189348	0.6697	0.910071	no	0.189348	0.6697
Q00651	Itga4	integrin alpha 4	16401	Q00651_S1030	TB_02H-MOCK_00H	-0.27773	0.616327	0.890287	no	-0.27773	0.616327
Q00PI9	Hnrnpul2	heterogeneous nuclear ribonucleoprotein U-like 2	68693	Q00PI9_S226	TB_02H-MOCK_00H	0.431	0.530842	0.8564	no	0.431	0.530842
Q01320	Top2a	topoisomerase (DNA) II alpha	21973	Q01320_S890;Q01320_Y891	TB_02H-MOCK_00H	-0.614577	0.327088	0.752985	no	-0.614577	0.327088
Q01965	Ly9	lymphocyte antigen 9	17085	Q01965_S519	TB_02H-MOCK_00H	0.225318	0.65502	0.904492	no	0.225318	0.65502
Q01965	Ly9	lymphocyte antigen 9	17085	Q01965_S644;Q01965_T649	TB_02H-MOCK_00H	#NUM!		0	yes	10.363	0.0421102
Q01965	Ly9	lymphocyte antigen 9	17085	Q01965_T499	TB_02H-MOCK_00H	0.587598	0.0420091	0.296524	no	0.587598	0.0420091
Q01965	Ly9	lymphocyte antigen 9	17085	Q01965_T649	TB_02H-MOCK_00H	0.834174	0.00401911	0.0787843	no	0.834174	0.00401911
Q02053	Uba1	ubiquitin-like modifier activating enzyme 1	22201	Q02053_S13	TB_02H-MOCK_00H	2.03167	0.210483	0.634896	no	2.03167	0.210483
Q02053	Uba1	ubiquitin-like modifier activating enzyme 1	22201	Q02053_S21;Q02053_S35	TB_02H-MOCK_00H	0.0447834	0.916015	0.977117	no	0.0447834	0.916015
Q02053	Uba1	ubiquitin-like modifier activating enzyme 1	22201	Q02053_S3	TB_02H-MOCK_00H	-0.883928	0.407449	0.808358	no	-0.883928	0.407449
Q02053	Uba1	ubiquitin-like modifier activating enzyme 1	22201	Q02053_S4	TB_02H-MOCK_00H	#NUM!		0	yes	-6.46297	0.030623
Q02053	Uba1	ubiquitin-like modifier activating enzyme 1	22201	Q02053_S46	TB_02H-MOCK_00H	1.28951	8.73386e-08	4.73666e-05	no	1.28951	8.73386e-08
Q02053	Uba1	ubiquitin-like modifier activating enzyme 1	22201	Q02053_S810	TB_02H-MOCK_00H	0.696163	0.294055	0.72101	no	0.696163	0.294055
Q02819	Nucb1	nucleobindin 1	18220	Q02819_S368	TB_02H-MOCK_00H	-0.436605	0.0860777	0.418993	no	-0.436605	0.0860777
Q02819	Nucb1	nucleobindin 1	18220	Q02819_S456	TB_02H-MOCK_00H	-0.410967	0.0628637	0.359822	no	-0.410967	0.0628637
Q02819	Nucb1	nucleobindin 1	18220	Q02819_S85	TB_02H-MOCK_00H	0.761875	0.253449	0.684911	no	0.761875	0.253449
Q03141	Mark3	MAP/microtubule affinity regulating kinase 3	17169	Q03141_S469	TB_02H-MOCK_00H	-0.17896	0.431994	0.814422	no	-0.17896	0.431994
Q03141	Mark3	MAP/microtubule affinity regulating kinase 3	17169	Q03141_S601	TB_02H-MOCK_00H	-0.393469	0.546236	0.860369	no	-0.393469	0.546236
Q03141	Mark3	MAP/microtubule affinity regulating kinase 3	17169	Q03141_S606	TB_02H-MOCK_00H	1.18155	0.257787	0.688314	no	1.18155	0.257787
Q03141	Mark3	MAP/microtubule affinity regulating kinase 3	17169	Q03141_T507	TB_02H-MOCK_00H	-0.420042	0.318458	0.745243	no	-0.420042	0.318458
Q03147	Cdk7	cyclin-dependent kinase 7	12572	Q03147_S161;Q03147_S164	TB_02H-MOCK_00H	-0.559765	0.34634	0.769122	no	-0.559765	0.34634
Q03147	Cdk7	cyclin-dependent kinase 7	12572	Q03147_S164;Q03147_T170	TB_02H-MOCK_00H	0.25429	0.751449	0.937403	no	0.25429	0.751449
Q03267	Q03267			Q03267_S440	TB_02H-MOCK_00H	-0.853803	0.24638	0.676636	no	-0.853803	0.24638
Q03347	Q03347			Q03347_T14	TB_02H-MOCK_00H	-0.927801	0.0191582	0.192707	no	-0.927801	0.0191582
Q03963	Eif2ak2	eukaryotic translation initiation factor 2-alpha kinase 2	19106	Q03963_S110	TB_02H-MOCK_00H	-0.179862	0.681417	0.912395	no	-0.179862	0.681417
Q03963	Eif2ak2	eukaryotic translation initiation factor 2-alpha kinase 2	19106	Q03963_S223	TB_02H-MOCK_00H	0.830079	0.0749795	0.392512	no	0.830079	0.0749795
Q04690	Nf1	neurofibromin 1	18015	Q04690_S2517	TB_02H-MOCK_00H	0.050151	0.893248	0.972654	no	0.050151	0.893248
Q04690	Nf1	neurofibromin 1	18015	Q04690_S866	TB_02H-MOCK_00H	0.395799	0.398589	0.805493	no	0.395799	0.398589
Q04690	Nf1	neurofibromin 1	18015	Q04690_T2516	TB_02H-MOCK_00H	-0.176426	0.38276	0.79534	no	-0.176426	0.38276
Q04692	Smarcad1	SWI/SNF-related, matrix-associated actin-dependent regulator of chromatin, subfamily a, containing DEAD/H box 1	13990	Q04692_S124;Q04692_S127	TB_02H-MOCK_00H	0.198391	0.843353	0.961384	no	0.198391	0.843353
Q04692	Smarcad1	SWI/SNF-related, matrix-associated actin-dependent regulator of chromatin, subfamily a, containing DEAD/H box 1	13990	Q04692_S96	TB_02H-MOCK_00H	#NUM!		0	yes	9.99236	0.0150213
Q04692	Smarcad1	SWI/SNF-related, matrix-associated actin-dependent regulator of chromatin, subfamily a, containing DEAD/H box 1	13990	Q04692_S96;Q04692_S103	TB_02H-MOCK_00H	0.24158	0.827733	0.959836	no	0.24158	0.827733
Q04863	Relb	avian reticuloendotheliosis viral (v-rel) oncogene related B	19698	Q04863_S552	TB_02H-MOCK_00H	1.50422	9.38234e-07	0.000290763	no	1.50422	9.38234e-07
Q04899	Cdk18	cyclin-dependent kinase 18	18557	Q04899_S109	TB_02H-MOCK_00H	-0.289901	0.711337	0.922887	no	-0.289901	0.711337
Q04899	Cdk18	cyclin-dependent kinase 18	18557	Q04899_S111	TB_02H-MOCK_00H	-0.181777	0.761969	0.940926	no	-0.181777	0.761969
Q04899	Cdk18	cyclin-dependent kinase 18	18557	Q04899_S66	TB_02H-MOCK_00H	-0.48873	0.538592	0.85974	no	-0.48873	0.538592
Q04899	Cdk18	cyclin-dependent kinase 18	18557	Q04899_S75	TB_02H-MOCK_00H	-0.142122	0.731626	0.930458	no	-0.142122	0.731626
Q05512	Mark2	MAP/microtubule affinity regulating kinase 2	13728	Q05512_S40	TB_02H-MOCK_00H	#NUM!		0	yes	-6.65903	0.0477102
Q05512	Mark2	MAP/microtubule affinity regulating kinase 2	13728	Q05512_S40;Q05512_T42	TB_02H-MOCK_00H	0.504921	0.477472	0.828543	no	0.504921	0.477472
Q05512	Mark2	MAP/microtubule affinity regulating kinase 2	13728	Q05512_S408	TB_02H-MOCK_00H	-0.700993	0.268285	0.696625	no	-0.700993	0.268285
Q05512	Mark2	MAP/microtubule affinity regulating kinase 2	13728	Q05512_S409	TB_02H-MOCK_00H	-0.550268	0.291487	0.71965	no	-0.550268	0.291487
Q05512	Mark2	MAP/microtubule affinity regulating kinase 2	13728	Q05512_S43	TB_02H-MOCK_00H	2.71999	0.0104853	0.138695	no	2.71999	0.0104853
Q05512	Mark2	MAP/microtubule affinity regulating kinase 2	13728	Q05512_S446;Q05512_S453	TB_02H-MOCK_00H	0.247562	0.336553	0.760211	no	0.247562	0.336553
Q05512	Mark2	MAP/microtubule affinity regulating kinase 2	13728	Q05512_S453	TB_02H-MOCK_00H	-0.295412	0.368895	0.787637	no	-0.295412	0.368895
Q05512	Mark2	MAP/microtubule affinity regulating kinase 2	13728	Q05512_S480	TB_02H-MOCK_00H	1.522	0.515362	0.847976	no	1.522	0.515362
Q05512	Mark2	MAP/microtubule affinity regulating kinase 2	13728	Q05512_S483	TB_02H-MOCK_00H	0.352844	0.41711	0.80935	no	0.352844	0.41711
Q05512	Mark2	MAP/microtubule affinity regulating kinase 2	13728	Q05512_S592	TB_02H-MOCK_00H	-0.312391	0.490958	0.836357	no	-0.312391	0.490958
Q05512	Mark2	MAP/microtubule affinity regulating kinase 2	13728	Q05512_T42	TB_02H-MOCK_00H	#NUM!		0	yes	7.62659	0.0384123
Q05512	Mark2	MAP/microtubule affinity regulating kinase 2	13728	Q05512_T447;Q05512_S453	TB_02H-MOCK_00H	-0.455645	0.255574	0.685604	no	-0.455645	0.255574
Q05816	Fabp5	fatty acid binding protein 5, epidermal	16592	Q05816_S3	TB_02H-MOCK_00H	-0.184125	0.652481	0.903543	no	-0.184125	0.652481
Q05CL8	Larp7	La ribonucleoprotein domain family, member 7	28036	Q05CL8_S253	TB_02H-MOCK_00H	0.596083	0.393997	0.804055	no	0.596083	0.393997
Q05CL8	Larp7	La ribonucleoprotein domain family, member 7	28036	Q05CL8_S253;Q05CL8_S256	TB_02H-MOCK_00H	0.461054	0.356474	0.775831	no	0.461054	0.356474
Q05CL8	Larp7	La ribonucleoprotein domain family, member 7	28036	Q05CL8_S253;Q05CL8_S256;Q05CL8_T260	TB_02H-MOCK_00H	-0.931826	0.31917	0.745303	no	-0.931826	0.31917
Q05D44	Eif5b	eukaryotic translation initiation factor 5B	226982	Q05D44_S108	TB_02H-MOCK_00H	-0.118752	0.886669	0.970483	no	-0.118752	0.886669
Q05D44	Eif5b	eukaryotic translation initiation factor 5B	226982	Q05D44_S108;Q05D44_S114	TB_02H-MOCK_00H	0.257578	0.443604	0.816678	no	0.257578	0.443604
Q05D44	Eif5b	eukaryotic translation initiation factor 5B	226982	Q05D44_S114	TB_02H-MOCK_00H	-0.00304666	0.99272	0.997009	no	-0.00304666	0.99272
Q05D44	Eif5b	eukaryotic translation initiation factor 5B	226982	Q05D44_S132;Q05D44_S137;Q05D44_S139	TB_02H-MOCK_00H	-0.96178	0.122805	0.494565	no	-0.96178	0.122805
Q05D44	Eif5b	eukaryotic translation initiation factor 5B	226982	Q05D44_S137	TB_02H-MOCK_00H	-0.241465	0.53968	0.860369	no	-0.241465	0.53968
Q05D44	Eif5b	eukaryotic translation initiation factor 5B	226982	Q05D44_S137;Q05D44_S139	TB_02H-MOCK_00H	-1.25941	0.124266	0.497368	no	-1.25941	0.124266
Q05D44	Eif5b	eukaryotic translation initiation factor 5B	226982	Q05D44_S139	TB_02H-MOCK_00H	-0.389692	0.400136	0.805493	no	-0.389692	0.400136
Q05D44	Eif5b	eukaryotic translation initiation factor 5B	226982	Q05D44_S145	TB_02H-MOCK_00H	#NUM!		0	yes	7.13247	0.0331761
Q05D44	Eif5b	eukaryotic translation initiation factor 5B	226982	Q05D44_S215	TB_02H-MOCK_00H	0.0473363	0.768811	0.943507	no	0.0473363	0.768811
Q05D44	Eif5b	eukaryotic translation initiation factor 5B	226982	Q05D44_T107;Q05D44_S114	TB_02H-MOCK_00H	0.185521	0.835194	0.959836	no	0.185521	0.835194
Q05D44	Eif5b	eukaryotic translation initiation factor 5B	226982	Q05D44_T212	TB_02H-MOCK_00H	-0.683308	0.165384	0.575265	no	-0.683308	0.165384
Q06649	Q06649			Q06649_S277	TB_02H-MOCK_00H	-0.22374	0.484407	0.833339	no	-0.22374	0.484407
Q06649	Q06649			Q06649_S277;Q06649_S282;Q06649_T286	TB_02H-MOCK_00H	0.206291	0.709224	0.922573	no	0.206291	0.709224
Q07113	Igf2r	insulin-like growth factor 2 receptor	16004	Q07113_S2392	TB_02H-MOCK_00H	0.437638	0.121574	0.494502	no	0.437638	0.121574
Q07113	Igf2r	insulin-like growth factor 2 receptor	16004	Q07113_S2401	TB_02H-MOCK_00H	0.997507	0.180155	0.593946	no	0.997507	0.180155
Q07113	Igf2r	insulin-like growth factor 2 receptor	16004	Q07113_S2471;Q07113_S2476	TB_02H-MOCK_00H	0.897944	0.0783837	0.400961	no	0.897944	0.0783837
Q07113	Igf2r	insulin-like growth factor 2 receptor	16004	Q07113_S2476	TB_02H-MOCK_00H	-0.0483761	0.894408	0.972932	no	-0.0483761	0.894408
Q07174	Map3k8	mitogen-activated protein kinase kinase kinase 8	26410	Q07174_S141	TB_02H-MOCK_00H	-1.11861	1.14347e-06	0.000333923	no	-1.11861	1.14347e-06
Q08024	Cbfb	core binding factor beta	12400	Q08024_S173	TB_02H-MOCK_00H	-0.282185	0.69582	0.918022	no	-0.282185	0.69582
Q08122	Tle3	transducin-like enhancer of split 3	21887	Q08122_S197	TB_02H-MOCK_00H	0.168107	0.564	0.866281	no	0.168107	0.564
Q08122	Tle3	transducin-like enhancer of split 3	21887	Q08122_S203	TB_02H-MOCK_00H	0.00148105	0.996598	0.999362	no	0.00148105	0.996598
Q08122	Tle3	transducin-like enhancer of split 3	21887	Q08122_S286	TB_02H-MOCK_00H	0.244737	0.540484	0.860369	no	0.244737	0.540484
Q08122	Tle3	transducin-like enhancer of split 3	21887	Q08122_S332	TB_02H-MOCK_00H	0.0791188	0.765053	0.942574	no	0.0791188	0.765053
Q08122	Tle3	transducin-like enhancer of split 3	21887	Q08122_T285	TB_02H-MOCK_00H	0.358253	0.548269	0.860975	no	0.358253	0.548269
Q08460	Kcnma1	potassium large conductance calcium-activated channel, subfamily M, alpha member 1	16531	Q08460_S1176	TB_02H-MOCK_00H	0.608932	0.154509	0.553106	no	0.608932	0.154509
Q08509	Eps8	epidermal growth factor receptor pathway substrate 8	13860	Q08509_S658	TB_02H-MOCK_00H	0.409205	0.45262	0.823038	no	0.409205	0.45262
Q08509	Eps8	epidermal growth factor receptor pathway substrate 8	13860	Q08509_S658;Q08509_S660	TB_02H-MOCK_00H	0.218698	0.821354	0.959294	no	0.218698	0.821354
Q08509	Eps8	epidermal growth factor receptor pathway substrate 8	13860	Q08509_S659;Q08509_S660	TB_02H-MOCK_00H	-1.15137	0.0878964	0.423943	no	-1.15137	0.0878964
Q08509	Eps8	epidermal growth factor receptor pathway substrate 8	13860	Q08509_S660	TB_02H-MOCK_00H	#NUM!		0	yes	-6.74213	0.0221445
Q08509	Eps8	epidermal growth factor receptor pathway substrate 8	13860	Q08509_S684	TB_02H-MOCK_00H	-2.15371	0.0698544	0.377272	no	-2.15371	0.0698544
Q08509	Eps8	epidermal growth factor receptor pathway substrate 8	13860	Q08509_T628	TB_02H-MOCK_00H	0.204848	0.694959	0.918022	no	0.204848	0.694959
Q08874	Mitf	melanogenesis associated transcription factor	17342	Q08874_S409	TB_02H-MOCK_00H	#NUM!		0	yes	6.23573	0.0378153
Q08874	Mitf	melanogenesis associated transcription factor	17342	Q08874_S414	TB_02H-MOCK_00H	-0.167788	0.603881	0.884152	no	-0.167788	0.603881
Q08943	Ssrp1	structure specific recognition protein 1	20833	Q08943_S444	TB_02H-MOCK_00H	0.224842	0.865024	0.967281	no	0.224842	0.865024
Q08943	Ssrp1	structure specific recognition protein 1	20833	Q08943_Y438	TB_02H-MOCK_00H	0.987281	0.349859	0.771412	no	0.987281	0.349859
Q08943	Ssrp1	structure specific recognition protein 1	20833	Q08943_Y441	TB_02H-MOCK_00H	-4.7013	0.0462252	0.310779	no	-4.7013	0.0462252
Q09XV5	Chd8	chromodomain helicase DNA binding protein 8	67772	Q09XV5_S1411;Q09XV5_S1422	TB_02H-MOCK_00H	-0.939737	0.0546582	0.33423	no	-0.939737	0.0546582
Q09XV5	Chd8	chromodomain helicase DNA binding protein 8	67772	Q09XV5_S2040	TB_02H-MOCK_00H	0.0360899	0.886335	0.970483	no	0.0360899	0.886335
Q0KL02	Trio	triple functional domain (PTPRF interacting)	223435	Q0KL02_S2458	TB_02H-MOCK_00H	-1.67194	0.00999884	0.133894	no	-1.67194	0.00999884
Q0KL02	Trio	triple functional domain (PTPRF interacting)	223435	Q0KL02_S2458;Q0KL02_S2462	TB_02H-MOCK_00H	1.52785	0.000219447	0.010738	no	1.52785	0.000219447
Q0KL02	Trio	triple functional domain (PTPRF interacting)	223435	Q0KL02_S2458;Q0KL02_S2465	TB_02H-MOCK_00H	0.721176	0.0823708	0.408589	no	0.721176	0.0823708
Q0P678	Zc3h18	zinc finger CCCH-type containing 18	76014	Q0P678_S528	TB_02H-MOCK_00H	1.83979	0.00256547	0.0587891	no	1.83979	0.00256547
Q0P678	Zc3h18	zinc finger CCCH-type containing 18	76014	Q0P678_S528;Q0P678_S530	TB_02H-MOCK_00H	-0.367861	0.352211	0.772066	no	-0.367861	0.352211
Q0P678	Zc3h18	zinc finger CCCH-type containing 18	76014	Q0P678_S530	TB_02H-MOCK_00H	0.530324	0.255282	0.685604	no	0.530324	0.255282
Q0P678	Zc3h18	zinc finger CCCH-type containing 18	76014	Q0P678_S532	TB_02H-MOCK_00H	-0.37012	0.267582	0.695795	no	-0.37012	0.267582
Q0P678	Zc3h18	zinc finger CCCH-type containing 18	76014	Q0P678_S847	TB_02H-MOCK_00H	0.551188	0.27927	0.70727	no	0.551188	0.27927
Q0P678	Zc3h18	zinc finger CCCH-type containing 18	76014	Q0P678_S891	TB_02H-MOCK_00H	0.650168	0.430886	0.81442	no	0.650168	0.430886
Q0P678	Zc3h18	zinc finger CCCH-type containing 18	76014	Q0P678_S92	TB_02H-MOCK_00H	0.38964	0.521309	0.852218	no	0.38964	0.521309
Q0VGY8	Tanc1	tetratricopeptide repeat, ankyrin repeat and coiled-coil containing 1	66860	Q0VGY8_S267	TB_02H-MOCK_00H	-0.134423	0.632611	0.897736	no	-0.134423	0.632611
Q0VGY8	Tanc1	tetratricopeptide repeat, ankyrin repeat and coiled-coil containing 1	66860	Q0VGY8_S443	TB_02H-MOCK_00H	#NUM!		0	yes	4.81114	0.0179071
Q148V8	Fam83h	family with sequence similarity 83, member H	105732	Q148V8_S871	TB_02H-MOCK_00H	0.241392	0.641017	0.901169	no	0.241392	0.641017
Q14AX6	Cdk12	cyclin-dependent kinase 12	69131	Q14AX6_S300;Q14AX6_S302	TB_02H-MOCK_00H	-0.64559	0.197469	0.617849	no	-0.64559	0.197469
Q14AX6	Cdk12	cyclin-dependent kinase 12	69131	Q14AX6_S322;Q14AX6_S324	TB_02H-MOCK_00H	0.385223	0.664726	0.908784	no	0.385223	0.664726
Q14AX6	Cdk12	cyclin-dependent kinase 12	69131	Q14AX6_S382;Q14AX6_S384	TB_02H-MOCK_00H	-0.0797304	0.915534	0.977117	no	-0.0797304	0.915534
Q14B70	Hdx	highly divergent homeobox	245596	Q14B70_S5;Q14B70_T8	TB_02H-MOCK_00H	0.560814	0.525326	0.854065	no	0.560814	0.525326
Q18PI6	Cd84	CD84 antigen	12523	Q18PI6_T275	TB_02H-MOCK_00H	-0.419554	0.468588	0.828237	no	-0.419554	0.468588
Q18PI6	Cd84	CD84 antigen	12523	Q18PI6_Y280	TB_02H-MOCK_00H	-0.361932	0.326199	0.75251	no	-0.361932	0.326199
Q1HFZ0	Nsun2	NOL1/NOP2/Sun domain family member 2	28114	Q1HFZ0_S23	TB_02H-MOCK_00H	-0.685707	0.116164	0.48399	no	-0.685707	0.116164
Q2KN98	Specc1l	sperm antigen with calponin homology and coiled-coil domains 1-like	74392	Q2KN98_S385	TB_02H-MOCK_00H	0.115982	0.864729	0.967118	no	0.115982	0.864729
Q2KN98	Specc1l	sperm antigen with calponin homology and coiled-coil domains 1-like	74392	Q2KN98_S832	TB_02H-MOCK_00H	-0.248683	0.369693	0.788841	no	-0.248683	0.369693
Q2KN98	Specc1l	sperm antigen with calponin homology and coiled-coil domains 1-like	74392	Q2KN98_S833	TB_02H-MOCK_00H	1.40583	0.00610029	0.0987579	no	1.40583	0.00610029
Q2NL51	Gsk3a	glycogen synthase kinase 3 alpha	606496	Q2NL51_S20	TB_02H-MOCK_00H	#NUM!		0	yes	9.80135	0.0242251
Q2NL51	Gsk3a	glycogen synthase kinase 3 alpha	606496	Q2NL51_S21	TB_02H-MOCK_00H	0.322873	0.397836	0.805493	no	0.322873	0.397836
Q2NL51	Gsk3a	glycogen synthase kinase 3 alpha	606496	Q2NL51_S278	TB_02H-MOCK_00H	0.378585	0.155337	0.554543	no	0.378585	0.155337
Q2NL51	Gsk3a	glycogen synthase kinase 3 alpha	606496	Q2NL51_S282	TB_02H-MOCK_00H	#NUM!		0	yes	-7.24997	0.0102012
Q2NL51	Gsk3a	glycogen synthase kinase 3 alpha	606496	Q2NL51_T19	TB_02H-MOCK_00H	0.745171	0.200875	0.622391	no	0.745171	0.200875
Q2NL51	Gsk3a	glycogen synthase kinase 3 alpha	606496	Q2NL51_Y279	TB_02H-MOCK_00H	0.175942	0.874009	0.969859	no	0.175942	0.874009
Q2PFD7	Psd3	pleckstrin and Sec7 domain containing 3	234353	Q2PFD7_S1000	TB_02H-MOCK_00H	-0.546185	0.0161501	0.173855	no	-0.546185	0.0161501
Q2PFD7	Psd3	pleckstrin and Sec7 domain containing 3	234353	Q2PFD7_S1000;Q2PFD7_S1009	TB_02H-MOCK_00H	0.42456	0.321673	0.747127	no	0.42456	0.321673
Q2PFD7	Psd3	pleckstrin and Sec7 domain containing 3	234353	Q2PFD7_S1001;Q2PFD7_S1009	TB_02H-MOCK_00H	1.19813	0.00493723	0.087791	no	1.19813	0.00493723
Q2PFD7	Psd3	pleckstrin and Sec7 domain containing 3	234353	Q2PFD7_S316	TB_02H-MOCK_00H	0.230219	0.410619	0.808847	no	0.230219	0.410619
Q2PFD7	Psd3	pleckstrin and Sec7 domain containing 3	234353	Q2PFD7_S759	TB_02H-MOCK_00H	0.114387	0.812915	0.956122	no	0.114387	0.812915
Q2PFD7	Psd3	pleckstrin and Sec7 domain containing 3	234353	Q2PFD7_S998;Q2PFD7_S1000;Q2PFD7_S1009	TB_02H-MOCK_00H	0.307125	0.714429	0.922887	no	0.307125	0.714429
Q2TBA3	Malt1	MALT1 paracaspase	240354	Q2TBA3_S360	TB_02H-MOCK_00H	0.47772	0.326419	0.75251	no	0.47772	0.326419
Q2TBE6	Pi4k2a	phosphatidylinositol 4-kinase type 2 alpha	84095	Q2TBE6_S44;Q2TBE6_S47	TB_02H-MOCK_00H	1.19861	0.00136067	0.0378428	no	1.19861	0.00136067
Q2TBE6	Pi4k2a	phosphatidylinositol 4-kinase type 2 alpha	84095	Q2TBE6_S44;Q2TBE6_S51	TB_02H-MOCK_00H	-0.214048	0.861597	0.966645	no	-0.214048	0.861597
Q2TBE6	Pi4k2a	phosphatidylinositol 4-kinase type 2 alpha	84095	Q2TBE6_S462	TB_02H-MOCK_00H	0.196954	0.171245	0.583281	no	0.196954	0.171245
Q2TBE6	Pi4k2a	phosphatidylinositol 4-kinase type 2 alpha	84095	Q2TBE6_S462;Q2TBE6_S468	TB_02H-MOCK_00H	-1.19221	0.0187015	0.189874	no	-1.19221	0.0187015
Q2TBE6	Pi4k2a	phosphatidylinositol 4-kinase type 2 alpha	84095	Q2TBE6_S464	TB_02H-MOCK_00H	-0.822859	0.110011	0.4754	no	-0.822859	0.110011
Q2TBE6	Pi4k2a	phosphatidylinositol 4-kinase type 2 alpha	84095	Q2TBE6_S468	TB_02H-MOCK_00H	#NUM!		0	yes	-6.36865	0.0291252
Q2TBE6	Pi4k2a	phosphatidylinositol 4-kinase type 2 alpha	84095	Q2TBE6_S47	TB_02H-MOCK_00H	0.360736	0.571258	0.868836	no	0.360736	0.571258
Q2TBE6	Pi4k2a	phosphatidylinositol 4-kinase type 2 alpha	84095	Q2TBE6_S47;Q2TBE6_S51	TB_02H-MOCK_00H	0.994453	0.234931	0.66449	no	0.994453	0.234931
Q2TBE6	Pi4k2a	phosphatidylinositol 4-kinase type 2 alpha	84095	Q2TBE6_S5	TB_02H-MOCK_00H	1.4663	0.000409857	0.0166709	no	1.4663	0.000409857
Q2TBE6	Pi4k2a	phosphatidylinositol 4-kinase type 2 alpha	84095	Q2TBE6_T4	TB_02H-MOCK_00H	-0.201958	0.736793	0.931585	no	-0.201958	0.736793
Q2TBE6	Pi4k2a	phosphatidylinositol 4-kinase type 2 alpha	84095	Q2TBE6_T4;Q2TBE6_S5	TB_02H-MOCK_00H	-0.0507781	0.936562	0.981534	no	-0.0507781	0.936562
Q2VPU4	Mlxip	MLX interacting protein	208104	Q2VPU4_S19	TB_02H-MOCK_00H	#NUM!		0	yes	6.02448	0.0379805
Q2VPU4	Mlxip	MLX interacting protein	208104	Q2VPU4_S33;Q2VPU4_T35	TB_02H-MOCK_00H	-0.189827	0.27331	0.7019	no	-0.189827	0.27331
Q2VPU4	Mlxip	MLX interacting protein	208104	Q2VPU4_S9	TB_02H-MOCK_00H	-0.204573	0.535196	0.858235	no	-0.204573	0.535196
Q3B7Z2	Osbp	oxysterol binding protein	76303	Q3B7Z2_S188;Q3B7Z2_S191	TB_02H-MOCK_00H	1.13237	0.171543	0.583281	no	1.13237	0.171543
Q3B7Z2	Osbp	oxysterol binding protein	76303	Q3B7Z2_S188;Q3B7Z2_S196	TB_02H-MOCK_00H	#NUM!		0	yes	-5.58969	0.0333243
Q3B7Z2	Osbp	oxysterol binding protein	76303	Q3B7Z2_S191;Q3B7Z2_S196	TB_02H-MOCK_00H	0.29757	0.406192	0.807176	no	0.29757	0.406192
Q3B7Z2	Osbp	oxysterol binding protein	76303	Q3B7Z2_S377;Q3B7Z2_S380	TB_02H-MOCK_00H	-1.11471	0.236705	0.665878	no	-1.11471	0.236705
Q3B7Z2	Osbp	oxysterol binding protein	76303	Q3B7Z2_S380;Q3B7Z2_S383;Q3B7Z2_S384	TB_02H-MOCK_00H	2.1	0.30073	0.727092	no	2.1	0.30073
Q3B7Z2	Osbp	oxysterol binding protein	76303	Q3B7Z2_Y413;Q3B7Z2_S414;Q3B7Z2_S419	TB_02H-MOCK_00H	-0.828888	0.432107	0.814422	no	-0.828888	0.432107
Q3TAA7	Stk11ip	serine/threonine kinase 11 interacting protein	71728	Q3TAA7_S388	TB_02H-MOCK_00H	-1.36932	0.00127288	0.0363329	no	-1.36932	0.00127288
Q3TAA7	Stk11ip	serine/threonine kinase 11 interacting protein	71728	Q3TAA7_S388;Q3TAA7_T395	TB_02H-MOCK_00H	-0.0692905	0.861283	0.966645	no	-0.0692905	0.861283
Q3TAA7	Stk11ip	serine/threonine kinase 11 interacting protein	71728	Q3TAA7_S393	TB_02H-MOCK_00H	-0.883974	0.0724897	0.384798	no	-0.883974	0.0724897
Q3TAA7	Stk11ip	serine/threonine kinase 11 interacting protein	71728	Q3TAA7_S759	TB_02H-MOCK_00H	0.854407	0.396829	0.805493	no	0.854407	0.396829
Q3TBD2	Arhgap45	Rho GTPase activating protein 45	70719	Q3TBD2_S14	TB_02H-MOCK_00H	-0.0874256	0.840486	0.960754	no	-0.0874256	0.840486
Q3TBD2	Arhgap45	Rho GTPase activating protein 45	70719	Q3TBD2_S23	TB_02H-MOCK_00H	-0.407875	0.590177	0.878517	no	-0.407875	0.590177
Q3TBD2	Arhgap45	Rho GTPase activating protein 45	70719	Q3TBD2_S566	TB_02H-MOCK_00H	0.431353	0.496372	0.839189	no	0.431353	0.496372
Q3TBD2	Arhgap45	Rho GTPase activating protein 45	70719	Q3TBD2_S568	TB_02H-MOCK_00H	0.577992	0.355085	0.775468	no	0.577992	0.355085
Q3TBD2	Arhgap45	Rho GTPase activating protein 45	70719	Q3TBD2_S577	TB_02H-MOCK_00H	-0.395906	0.791279	0.950973	no	-0.395906	0.791279
Q3TBD2	Arhgap45	Rho GTPase activating protein 45	70719	Q3TBD2_S577;Q3TBD2_S591	TB_02H-MOCK_00H	1.24241	0.475154	0.828419	no	1.24241	0.475154
Q3TBD2	Arhgap45	Rho GTPase activating protein 45	70719	Q3TBD2_S66	TB_02H-MOCK_00H	1.60622	0.000686016	0.0242641	no	1.60622	0.000686016
Q3TBD2	Arhgap45	Rho GTPase activating protein 45	70719	Q3TBD2_S68	TB_02H-MOCK_00H	0.323653	0.702711	0.92008	no	0.323653	0.702711
Q3TBD2	Arhgap45	Rho GTPase activating protein 45	70719	Q3TBD2_S875	TB_02H-MOCK_00H	2.8092	2.00657e-09	4.35293e-06	no	2.8092	2.00657e-09
Q3TBD2	Arhgap45	Rho GTPase activating protein 45	70719	Q3TBD2_T12	TB_02H-MOCK_00H	-0.793589	0.19485	0.613787	no	-0.793589	0.19485
Q3TBD2	Arhgap45	Rho GTPase activating protein 45	70719	Q3TBD2_T12;Q3TBD2_S14	TB_02H-MOCK_00H	0.49247	0.187645	0.60485	no	0.49247	0.187645
Q3TBD2	Arhgap45	Rho GTPase activating protein 45	70719	Q3TBD2_T39	TB_02H-MOCK_00H	-0.293801	0.470789	0.828419	no	-0.293801	0.470789
Q3TC46	Patl1	protein associated with topoisomerase II homolog 1 (yeast)	225929	Q3TC46_S177	TB_02H-MOCK_00H	-0.343888	0.200706	0.622383	no	-0.343888	0.200706
Q3TC46	Patl1	protein associated with topoisomerase II homolog 1 (yeast)	225929	Q3TC46_S177;Q3TC46_S184	TB_02H-MOCK_00H	0.13431	0.651689	0.903543	no	0.13431	0.651689
Q3TC46	Patl1	protein associated with topoisomerase II homolog 1 (yeast)	225929	Q3TC46_S179	TB_02H-MOCK_00H	-0.65866	0.0523675	0.326757	no	-0.65866	0.0523675
Q3TC46	Patl1	protein associated with topoisomerase II homolog 1 (yeast)	225929	Q3TC46_S179;Q3TC46_S184	TB_02H-MOCK_00H	1.82733	0.000836061	0.0277606	no	1.82733	0.000836061
Q3TC93	Hs1bp3	HCLS1 binding protein 3	58240	Q3TC93_S3	TB_02H-MOCK_00H	1.46661	0.0341445	0.262026	no	1.46661	0.0341445
Q3TCH7	Cul4a	cullin 4A	99375	Q3TCH7_S10	TB_02H-MOCK_00H	-1.07357	0.132441	0.510316	no	-1.07357	0.132441
Q3TCJ1	Abraxas2	BRISC complex subunit	109359	Q3TCJ1_S284	TB_02H-MOCK_00H	-0.294174	0.565553	0.866281	no	-0.294174	0.565553
Q3TD16	Q3TD16			Q3TD16_S154	TB_02H-MOCK_00H	0.813164	0.0233503	0.212834	no	0.813164	0.0233503
Q3TD16	Q3TD16			Q3TD16_S156	TB_02H-MOCK_00H	0.711556	0.107846	0.4704	no	0.711556	0.107846
Q3TD16	Q3TD16			Q3TD16_S156;Q3TD16_S162	TB_02H-MOCK_00H	-1.00502	0.0218528	0.205678	no	-1.00502	0.0218528
Q3TD16	Q3TD16			Q3TD16_T160	TB_02H-MOCK_00H	#NUM!		0	yes	7.52834	0.0305871
Q3TDQ1	Stt3b	STT3, subunit of the oligosaccharyltransferase complex, homolog B (S. cerevisiae)	68292	Q3TDQ1_S495;Q3TDQ1_S496	TB_02H-MOCK_00H	-1.1393	0.185075	0.602836	no	-1.1393	0.185075
[truncated: 4,610 more rows]

## Sheet: 4H
Protein	Gene	ProteinName	EntrezID	Uniprot_PTM	Comparison	log2FC	pvalue	adj.pvalue	imputed	iLog2FC	iPvalue
A1A5B6	Tbc1d25	TBC1 domain family, member 25	209815	A1A5B6_S560	TB_04H-MOCK_00H	0.291979	0.413979	0.76119	no	0.291979	0.413979
A2A432	Cul4b	cullin 4B	72584	A2A432_S149	TB_04H-MOCK_00H	-0.449473	0.202038	0.56847	no	-0.449473	0.202038
A2A4P0	Dhx8	DEAH (Asp-Glu-Ala-His) box polypeptide 8	217207	A2A4P0_S480	TB_04H-MOCK_00H	-0.404458	0.547196	0.843798	no	-0.404458	0.547196
A2A5R2	Arfgef2	ADP-ribosylation factor guanine nucleotide-exchange factor 2 (brefeldin A-inhibited)	99371	A2A5R2_S214;A2A5R2_S227	TB_04H-MOCK_00H	0.520163	0.371194	0.730762	no	0.520163	0.371194
A2A5R2	Arfgef2	ADP-ribosylation factor guanine nucleotide-exchange factor 2 (brefeldin A-inhibited)	99371	A2A5R2_S218;A2A5R2_S227	TB_04H-MOCK_00H	1.90083	0.100813	0.415308	no	1.90083	0.100813
A2A5R2	Arfgef2	ADP-ribosylation factor guanine nucleotide-exchange factor 2 (brefeldin A-inhibited)	99371	A2A5R2_S227	TB_04H-MOCK_00H	-0.249736	0.35969	0.719317	no	-0.249736	0.35969
A2A5R2	Arfgef2	ADP-ribosylation factor guanine nucleotide-exchange factor 2 (brefeldin A-inhibited)	99371	A2A5R2_S276	TB_04H-MOCK_00H	-0.569299	0.39632	0.748819	no	-0.569299	0.39632
A2A5R2	Arfgef2	ADP-ribosylation factor guanine nucleotide-exchange factor 2 (brefeldin A-inhibited)	99371	A2A5R2_S621	TB_04H-MOCK_00H	-0.148955	0.70575	0.905446	no	-0.148955	0.70575
A2A5R2	Arfgef2	ADP-ribosylation factor guanine nucleotide-exchange factor 2 (brefeldin A-inhibited)	99371	A2A5R2_S621;A2A5R2_T623	TB_04H-MOCK_00H	-0.717035	0.721522	0.914259	no	-0.717035	0.721522
A2A5R2	Arfgef2	ADP-ribosylation factor guanine nucleotide-exchange factor 2 (brefeldin A-inhibited)	99371	A2A5R2_S621;A2A5R2_T623;A2A5R2_S627	TB_04H-MOCK_00H	-0.0410406	0.92219	0.978741	no	-0.0410406	0.92219
A2A5R2	Arfgef2	ADP-ribosylation factor guanine nucleotide-exchange factor 2 (brefeldin A-inhibited)	99371	A2A5R2_S624;A2A5R2_S630	TB_04H-MOCK_00H	-0.320575	0.566187	0.847541	no	-0.320575	0.566187
A2A5R2	Arfgef2	ADP-ribosylation factor guanine nucleotide-exchange factor 2 (brefeldin A-inhibited)	99371	A2A5R2_T623;A2A5R2_S624	TB_04H-MOCK_00H	-0.184958	0.690283	0.901589	no	-0.184958	0.690283
A2A690	Tanc2	tetratricopeptide repeat, ankyrin repeat and coiled-coil containing 2	77097	A2A690_S1583	TB_04H-MOCK_00H	-0.253433	0.433247	0.771821	no	-0.253433	0.433247
A2A6A1	Gpatch8	G patch domain containing 8	237943	A2A6A1_S1037	TB_04H-MOCK_00H	0.13809	0.836092	0.956967	no	0.13809	0.836092
A2A791	Zmym4	zinc finger, MYM-type 4	67785	A2A791_S121	TB_04H-MOCK_00H	0.404154	0.335847	0.698337	no	0.404154	0.335847
A2A791	Zmym4	zinc finger, MYM-type 4	67785	A2A791_S1543;A2A791_S1548	TB_04H-MOCK_00H	#NUM!		0	yes	-5.76741	0.0355866
A2A7S8	C77080	expressed sequence C77080	97130	A2A7S8_S159	TB_04H-MOCK_00H	-0.404876	0.503	0.818511	no	-0.404876	0.503
A2A7S8	C77080	expressed sequence C77080	97130	A2A7S8_S323;A2A7S8_S325	TB_04H-MOCK_00H	-0.00177723	0.998102	0.99947	no	-0.00177723	0.998102
A2A7S8	C77080	expressed sequence C77080	97130	A2A7S8_S402	TB_04H-MOCK_00H	1.2414	0.000698151	0.0213634	no	1.2414	0.000698151
A2A7S8	C77080	expressed sequence C77080	97130	A2A7S8_S445	TB_04H-MOCK_00H	0.0805191	0.85542	0.962928	no	0.0805191	0.85542
A2A7S8	C77080	expressed sequence C77080	97130	A2A7S8_S543	TB_04H-MOCK_00H	#NUM!		0	yes	5.90824	0.0454322
A2A7S8	C77080	expressed sequence C77080	97130	A2A7S8_S560	TB_04H-MOCK_00H	1.32476	0.00126971	0.0336832	no	1.32476	0.00126971
A2A7S8	C77080	expressed sequence C77080	97130	A2A7S8_S610	TB_04H-MOCK_00H	0.689357	0.018139	0.170269	no	0.689357	0.018139
A2A7S8	C77080	expressed sequence C77080	97130	A2A7S8_S838	TB_04H-MOCK_00H	0.14106	0.787269	0.940734	no	0.14106	0.787269
A2A7S8	C77080	expressed sequence C77080	97130	A2A7S8_S838;A2A7S8_S842	TB_04H-MOCK_00H	0.94952	0.0439111	0.280477	no	0.94952	0.0439111
A2A7S8	C77080	expressed sequence C77080	97130	A2A7S8_S883;A2A7S8_S886	TB_04H-MOCK_00H	1.81941	0.000511097	0.0170686	no	1.81941	0.000511097
A2A7S8	C77080	expressed sequence C77080	97130	A2A7S8_S886;A2A7S8_S889	TB_04H-MOCK_00H	1.28756	0.00919699	0.118834	no	1.28756	0.00919699
A2A7S8	C77080	expressed sequence C77080	97130	A2A7S8_S909	TB_04H-MOCK_00H	0.828876	0.0289761	0.222703	no	0.828876	0.0289761
A2A7S8	C77080	expressed sequence C77080	97130	A2A7S8_S952;A2A7S8_S959	TB_04H-MOCK_00H	0.894156	0.0121245	0.138725	no	0.894156	0.0121245
A2AAE1	4932438A13Rik	RIKEN cDNA 4932438A13 gene	229227	A2AAE1_S2755	TB_04H-MOCK_00H	0.343371	0.152852	0.505201	no	0.343371	0.152852
A2AAE1	4932438A13Rik	RIKEN cDNA 4932438A13 gene	229227	A2AAE1_S2898;A2AAE1_S2910	TB_04H-MOCK_00H	1.04757	0.0123449	0.140029	no	1.04757	0.0123449
A2AAE1	4932438A13Rik	RIKEN cDNA 4932438A13 gene	229227	A2AAE1_S799	TB_04H-MOCK_00H	2.03398	0.181046	0.541372	no	2.03398	0.181046
A2AAE1	4932438A13Rik	RIKEN cDNA 4932438A13 gene	229227	A2AAE1_T3053;A2AAE1_S3055	TB_04H-MOCK_00H	0.070799	0.932848	0.981168	no	0.070799	0.932848
A2AAY5	Sh3pxd2b	SH3 and PX domains 2B	268396	A2AAY5_S290	TB_04H-MOCK_00H	#NUM!		0	yes	4.52632	0.0142216
A2AAY5	Sh3pxd2b	SH3 and PX domains 2B	268396	A2AAY5_S339	TB_04H-MOCK_00H	-0.225538	0.798008	0.943204	no	-0.225538	0.798008
A2AAY5	Sh3pxd2b	SH3 and PX domains 2B	268396	A2AAY5_S550	TB_04H-MOCK_00H	#NUM!		0	yes	3.9564	0.0237889
A2AAY5	Sh3pxd2b	SH3 and PX domains 2B	268396	A2AAY5_S767	TB_04H-MOCK_00H	0.468719	0.183237	0.544431	no	0.468719	0.183237
A2AAY5	Sh3pxd2b	SH3 and PX domains 2B	268396	A2AAY5_T766	TB_04H-MOCK_00H	0.714526	0.06591	0.339829	no	0.714526	0.06591
A2AB59	Arhgap27	Rho GTPase activating protein 27	544817	A2AB59_S118	TB_04H-MOCK_00H	-0.626625	0.179505	0.540486	no	-0.626625	0.179505
A2AB59	Arhgap27	Rho GTPase activating protein 27	544817	A2AB59_S215	TB_04H-MOCK_00H	0.478039	0.302512	0.669401	no	0.478039	0.302512
A2AB59	Arhgap27	Rho GTPase activating protein 27	544817	A2AB59_S458;A2AB59_S459	TB_04H-MOCK_00H	-1.06804	0.636978	0.878961	no	-1.06804	0.636978
A2AB59	Arhgap27	Rho GTPase activating protein 27	544817	A2AB59_S459	TB_04H-MOCK_00H	-0.71702	0.033951	0.245185	no	-0.71702	0.033951
A2AB59	Arhgap27	Rho GTPase activating protein 27	544817	A2AB59_S459;A2AB59_S462	TB_04H-MOCK_00H	-0.119426	0.657322	0.888995	no	-0.119426	0.657322
A2AB59	Arhgap27	Rho GTPase activating protein 27	544817	A2AB59_S459;A2AB59_S462;A2AB59_S469	TB_04H-MOCK_00H	-0.493717	0.533058	0.837548	no	-0.493717	0.533058
A2AB59	Arhgap27	Rho GTPase activating protein 27	544817	A2AB59_S462;A2AB59_T464	TB_04H-MOCK_00H	0.0318005	0.956298	0.985144	no	0.0318005	0.956298
A2AB59	Arhgap27	Rho GTPase activating protein 27	544817	A2AB59_S632	TB_04H-MOCK_00H	1.72477	0.0316284	0.23619	no	1.72477	0.0316284
A2ADY9	Ddi2	DNA-damage inducible protein 2	68817	A2ADY9_S120	TB_04H-MOCK_00H	1.15612	0.00245635	0.0516304	no	1.15612	0.00245635
A2ADY9	Ddi2	DNA-damage inducible protein 2	68817	A2ADY9_S121	TB_04H-MOCK_00H	0.665717	0.299811	0.666197	no	0.665717	0.299811
A2AF47	Dock11	dedicator of cytokinesis 11	75974	A2AF47_S12	TB_04H-MOCK_00H	0.400771	0.58295	0.858019	no	0.400771	0.58295
A2AF47	Dock11	dedicator of cytokinesis 11	75974	A2AF47_S1237	TB_04H-MOCK_00H	-1.07085	0.204186	0.570421	no	-1.07085	0.204186
A2AF47	Dock11	dedicator of cytokinesis 11	75974	A2AF47_S1240	TB_04H-MOCK_00H	-0.0910689	0.742004	0.923854	no	-0.0910689	0.742004
A2AF47	Dock11	dedicator of cytokinesis 11	75974	A2AF47_S1350	TB_04H-MOCK_00H	-0.210526	0.622319	0.874277	no	-0.210526	0.622319
A2AF47	Dock11	dedicator of cytokinesis 11	75974	A2AF47_S797	TB_04H-MOCK_00H	-0.482969	0.675567	0.894637	no	-0.482969	0.675567
A2AG58	Bclaf3	Bclaf1 and Thrap3 family member 3	382252	A2AG58_S201	TB_04H-MOCK_00H	0.720318	0.0919476	0.401719	no	0.720318	0.0919476
A2AG58	Bclaf3	Bclaf1 and Thrap3 family member 3	382252	A2AG58_S205	TB_04H-MOCK_00H	-0.263495	0.593359	0.863843	no	-0.263495	0.593359
A2AG58	Bclaf3	Bclaf1 and Thrap3 family member 3	382252	A2AG58_Y633;A2AG58_Y636;A2AG58_T637	TB_04H-MOCK_00H	0.496568	0.751956	0.928297	no	0.496568	0.751956
A2AHC3	Camsap1	calmodulin regulated spectrin-associated protein 1	227634	A2AHC3_S1109	TB_04H-MOCK_00H	0.0078389	0.979971	0.992951	no	0.0078389	0.979971
A2AHC3	Camsap1	calmodulin regulated spectrin-associated protein 1	227634	A2AHC3_S445	TB_04H-MOCK_00H	0.291759	0.645068	0.883226	no	0.291759	0.645068
A2AHC3	Camsap1	calmodulin regulated spectrin-associated protein 1	227634	A2AHC3_S502	TB_04H-MOCK_00H	0.283805	0.469783	0.798718	no	0.283805	0.469783
A2AHC3	Camsap1	calmodulin regulated spectrin-associated protein 1	227634	A2AHC3_S553;A2AHC3_T559	TB_04H-MOCK_00H	1.03564	0.0665255	0.341663	no	1.03564	0.0665255
A2AHC3	Camsap1	calmodulin regulated spectrin-associated protein 1	227634	A2AHC3_T1519;A2AHC3_T1521;A2AHC3_T1527	TB_04H-MOCK_00H	0.0432659	0.88764	0.972002	no	0.0432659	0.88764
A2AHC3	Camsap1	calmodulin regulated spectrin-associated protein 1	227634	A2AHC3_T559	TB_04H-MOCK_00H	-0.690256	0.00994451	0.124465	no	-0.690256	0.00994451
A2AIV2	Virma	vir like m6A methyltransferase associated	66185	A2AIV2_S133	TB_04H-MOCK_00H	-0.162936	0.826989	0.954519	no	-0.162936	0.826989
A2AIV2	Virma	vir like m6A methyltransferase associated	66185	A2AIV2_S138	TB_04H-MOCK_00H	1.0425	0.116778	0.448241	no	1.0425	0.116778
A2AIV2	Virma	vir like m6A methyltransferase associated	66185	A2AIV2_S1577	TB_04H-MOCK_00H	0.266721	0.418778	0.763831	no	0.266721	0.418778
A2AIV2	Virma	vir like m6A methyltransferase associated	66185	A2AIV2_S1578	TB_04H-MOCK_00H	0.256187	0.0103195	0.126295	no	0.256187	0.0103195
A2AIV8	Card9	caspase recruitment domain family, member 9	332579	A2AIV8_S425	TB_04H-MOCK_00H	#NUM!		0	yes	5.87399	0.046305
A2AIV8	Card9	caspase recruitment domain family, member 9	332579	A2AIV8_S425;A2AIV8_S430	TB_04H-MOCK_00H	#NUM!		0	yes	-5.91307	0.0138997
A2AIW0	Entr1	endosome associated trafficking regulator 1	68112	A2AIW0_S241;A2AIW0_S245	TB_04H-MOCK_00H	0.573467	0.172398	0.530746	no	0.573467	0.172398
A2AJ88	Pnpla7	patatin-like phospholipase domain containing 7	241274	A2AJ88_S341	TB_04H-MOCK_00H	0.925395	0.00744164	0.104167	no	0.925395	0.00744164
A2AJ88	Pnpla7	patatin-like phospholipase domain containing 7	241274	A2AJ88_S379	TB_04H-MOCK_00H	0.143057	0.60812	0.869933	no	0.143057	0.60812
A2AJI0	Map7d1	MAP7 domain containing 1	245877	A2AJI0_S114	TB_04H-MOCK_00H	-0.227619	0.600526	0.867388	no	-0.227619	0.600526
A2AJI0	Map7d1	MAP7 domain containing 1	245877	A2AJI0_S114;A2AJI0_S115	TB_04H-MOCK_00H	-0.242873	0.751025	0.928297	no	-0.242873	0.751025
A2AJI0	Map7d1	MAP7 domain containing 1	245877	A2AJI0_S115	TB_04H-MOCK_00H	-0.0282594	0.95553	0.985142	no	-0.0282594	0.95553
A2AJI0	Map7d1	MAP7 domain containing 1	245877	A2AJI0_S115;A2AJI0_S118	TB_04H-MOCK_00H	0.235419	0.815805	0.94934	no	0.235419	0.815805
A2AJI0	Map7d1	MAP7 domain containing 1	245877	A2AJI0_S115;A2AJI0_S118;A2AJI0_S125	TB_04H-MOCK_00H	0.269235	0.806105	0.946662	no	0.269235	0.806105
A2AJI0	Map7d1	MAP7 domain containing 1	245877	A2AJI0_S115;A2AJI0_T120;A2AJI0_S125	TB_04H-MOCK_00H	-2.35828	0.310291	0.676447	no	-2.35828	0.310291
A2AJI0	Map7d1	MAP7 domain containing 1	245877	A2AJI0_S115;A2AJI0_T121	TB_04H-MOCK_00H	-0.378796	0.713331	0.909497	no	-0.378796	0.713331
A2AJI0	Map7d1	MAP7 domain containing 1	245877	A2AJI0_S118	TB_04H-MOCK_00H	#NUM!		0	yes	-9.38075	0.0293299
A2AJI0	Map7d1	MAP7 domain containing 1	245877	A2AJI0_S118;A2AJI0_T120	TB_04H-MOCK_00H	-0.202693	0.53448	0.837548	no	-0.202693	0.53448
A2AJI0	Map7d1	MAP7 domain containing 1	245877	A2AJI0_S273	TB_04H-MOCK_00H	0.272302	0.533006	0.837548	no	0.272302	0.533006
A2AJI0	Map7d1	MAP7 domain containing 1	245877	A2AJI0_S313	TB_04H-MOCK_00H	0.0342327	0.931478	0.980824	no	0.0342327	0.931478
A2AJI0	Map7d1	MAP7 domain containing 1	245877	A2AJI0_S368	TB_04H-MOCK_00H	-0.596853	0.262821	0.63525	no	-0.596853	0.262821
A2AJI0	Map7d1	MAP7 domain containing 1	245877	A2AJI0_S401	TB_04H-MOCK_00H	-0.185101	0.833774	0.956679	no	-0.185101	0.833774
A2AJI0	Map7d1	MAP7 domain containing 1	245877	A2AJI0_S448	TB_04H-MOCK_00H	-0.399536	0.313093	0.677801	no	-0.399536	0.313093
A2AJI0	Map7d1	MAP7 domain containing 1	245877	A2AJI0_S454	TB_04H-MOCK_00H	0.85451	0.0877345	0.392311	no	0.85451	0.0877345
A2AJI0	Map7d1	MAP7 domain containing 1	245877	A2AJI0_S544;A2AJI0_S548	TB_04H-MOCK_00H	0.377631	0.556232	0.845092	no	0.377631	0.556232
A2AJI0	Map7d1	MAP7 domain containing 1	245877	A2AJI0_S544;A2AJI0_S548;A2AJI0_S552	TB_04H-MOCK_00H	-0.79975	0.438222	0.774034	no	-0.79975	0.438222
A2AJI0	Map7d1	MAP7 domain containing 1	245877	A2AJI0_S78	TB_04H-MOCK_00H	0.510212	0.126176	0.464789	no	0.510212	0.126176
A2AJI0	Map7d1	MAP7 domain containing 1	245877	A2AJI0_T121	TB_04H-MOCK_00H	-8.33059	0.633399	0.877989	no	-8.33059	0.633399
A2AJI0	Map7d1	MAP7 domain containing 1	245877	A2AJI0_T40;A2AJI0_T49	TB_04H-MOCK_00H	0.739781	0.196087	0.560736	no	0.739781	0.196087
A2AJI0	Map7d1	MAP7 domain containing 1	245877	A2AJI0_T74	TB_04H-MOCK_00H	#NUM!		0	yes	5.89674	0.0420038
A2AJT4	A2AJT4			A2AJT4_S211	TB_04H-MOCK_00H	-0.71355	0.116298	0.447702	no	-0.71355	0.116298
A2AJT4	A2AJT4			A2AJT4_S290	TB_04H-MOCK_00H	0.961669	0.0591976	0.323519	no	0.961669	0.0591976
A2AKB9	Dcaf10	DDB1 and CUL4 associated factor 10	242418	A2AKB9_S356	TB_04H-MOCK_00H	0.232562	0.428936	0.768549	no	0.232562	0.428936
A2AM29	Mllt3	myeloid/lymphoid or mixed-lineage leukemia; translocated to, 3	70122	A2AM29_S489	TB_04H-MOCK_00H	-0.31449	0.516806	0.828931	no	-0.31449	0.516806
A2AN08	Ubr4	ubiquitin protein ligase E3 component n-recognin 4	69116	A2AN08_S2715	TB_04H-MOCK_00H	-0.864392	0.127458	0.467158	no	-0.864392	0.127458
A2AN08	Ubr4	ubiquitin protein ligase E3 component n-recognin 4	69116	A2AN08_S2716	TB_04H-MOCK_00H	0.311871	0.462938	0.793556	no	0.311871	0.462938
A2AN08	Ubr4	ubiquitin protein ligase E3 component n-recognin 4	69116	A2AN08_S2892;A2AN08_S2894	TB_04H-MOCK_00H	-2.88644	0.00422455	0.0727583	no	-2.88644	0.00422455
A2AN08	Ubr4	ubiquitin protein ligase E3 component n-recognin 4	69116	A2AN08_S362	TB_04H-MOCK_00H	1.85365	1.14555e-05	0.00117759	no	1.85365	1.14555e-05
A2AN08	Ubr4	ubiquitin protein ligase E3 component n-recognin 4	69116	A2AN08_S362;A2AN08_S365	TB_04H-MOCK_00H	1.61075	0.00184596	0.0436855	no	1.61075	0.00184596
A2AN08	Ubr4	ubiquitin protein ligase E3 component n-recognin 4	69116	A2AN08_S364	TB_04H-MOCK_00H	#NUM!		0	yes	5.45463	0.0460521
A2AN08	Ubr4	ubiquitin protein ligase E3 component n-recognin 4	69116	A2AN08_S3857	TB_04H-MOCK_00H	1.24702	0.0145951	0.151519	no	1.24702	0.0145951
A2AN08	Ubr4	ubiquitin protein ligase E3 component n-recognin 4	69116	A2AN08_S619	TB_04H-MOCK_00H	-0.418585	0.0915724	0.401429	no	-0.418585	0.0915724
A2AN08	Ubr4	ubiquitin protein ligase E3 component n-recognin 4	69116	A2AN08_S620	TB_04H-MOCK_00H	#NUM!		0	yes	-5.37485	0.0235256
A2AN08	Ubr4	ubiquitin protein ligase E3 component n-recognin 4	69116	A2AN08_T360	TB_04H-MOCK_00H	2.01761	1.00627e-06	0.000169749	no	2.01761	1.00627e-06
A2APB8	Tpx2	TPX2, microtubule-associated	72119	A2APB8_S486	TB_04H-MOCK_00H	#NUM!		0	yes	-5.26726	0.0387869
A2APV2	Fmnl2	formin-like 2	71409	A2APV2_S171	TB_04H-MOCK_00H	0.341811	0.530632	0.836105	no	0.341811	0.530632
A2AR02	Ppig	peptidyl-prolyl isomerase G (cyclophilin G)	228005	A2AR02_S252;A2AR02_S254;A2AR02_S255	TB_04H-MOCK_00H	-1.77034	0.00274921	0.0553645	no	-1.77034	0.00274921
A2AR02	Ppig	peptidyl-prolyl isomerase G (cyclophilin G)	228005	A2AR02_S252;A2AR02_S254;A2AR02_S257	TB_04H-MOCK_00H	-0.948751	0.350547	0.710271	no	-0.948751	0.350547
A2AR02	Ppig	peptidyl-prolyl isomerase G (cyclophilin G)	228005	A2AR02_S254;A2AR02_S255;A2AR02_S257	TB_04H-MOCK_00H	-0.778009	0.351789	0.711032	no	-0.778009	0.351789
A2AR02	Ppig	peptidyl-prolyl isomerase G (cyclophilin G)	228005	A2AR02_S373	TB_04H-MOCK_00H	-0.249574	0.699824	0.903647	no	-0.249574	0.699824
A2AR02	Ppig	peptidyl-prolyl isomerase G (cyclophilin G)	228005	A2AR02_S411;A2AR02_S413	TB_04H-MOCK_00H	1.03049	0.70083	0.903647	no	1.03049	0.70083
A2AR50	Ralgps1	Ral GEF with PH domain and SH3 binding motif 1	241308	A2AR50_S297	TB_04H-MOCK_00H	-0.229749	0.686306	0.899909	no	-0.229749	0.686306
A2AR50	Ralgps1	Ral GEF with PH domain and SH3 binding motif 1	241308	A2AR50_S298	TB_04H-MOCK_00H	-0.0625436	0.867024	0.965706	no	-0.0625436	0.867024
A2ASS6	A2ASS6			A2ASS6_S1429;A2ASS6_S1434	TB_04H-MOCK_00H	1.96253	0.454323	0.788545	no	1.96253	0.454323
A2ASS6	A2ASS6			A2ASS6_S28369;A2ASS6_T28377	TB_04H-MOCK_00H	0.293554	0.653248	0.888171	no	0.293554	0.653248
A2ASS6	A2ASS6			A2ASS6_T31377;A2ASS6_T31378;A2ASS6_T31383;A2ASS6_Y31385	TB_04H-MOCK_00H	-1.15865	0.0860506	0.389587	no	-1.15865	0.0860506
A2AWA9	Rabgap1	RAB GTPase activating protein 1	227800	A2AWA9_S37	TB_04H-MOCK_00H	1.42613	0.00275624	0.0553645	no	1.42613	0.00275624
A2AWA9	Rabgap1	RAB GTPase activating protein 1	227800	A2AWA9_S987	TB_04H-MOCK_00H	-0.301224	0.398485	0.749685	no	-0.301224	0.398485
A2AWA9	Rabgap1	RAB GTPase activating protein 1	227800	A2AWA9_S987;A2AWA9_T991	TB_04H-MOCK_00H	0.596803	0.27047	0.64027	no	0.596803	0.27047
A2AWA9	Rabgap1	RAB GTPase activating protein 1	227800	A2AWA9_T47	TB_04H-MOCK_00H	0.15253	0.766989	0.933603	no	0.15253	0.766989
A2AWA9	Rabgap1	RAB GTPase activating protein 1	227800	A2AWA9_T991	TB_04H-MOCK_00H	#NUM!		0	yes	4.83262	0.0437194
A2BH40	Arid1a	AT rich interactive domain 1A (SWI-like)	93760	A2BH40_S1183	TB_04H-MOCK_00H	-0.0169933	0.948027	0.983825	no	-0.0169933	0.948027
A2BH40	Arid1a	AT rich interactive domain 1A (SWI-like)	93760	A2BH40_S1185	TB_04H-MOCK_00H	-0.0508426	0.826952	0.954519	no	-0.0508426	0.826952
A2BH40	Arid1a	AT rich interactive domain 1A (SWI-like)	93760	A2BH40_S365	TB_04H-MOCK_00H	-0.268149	0.662508	0.89125	no	-0.268149	0.662508
A2BH40	Arid1a	AT rich interactive domain 1A (SWI-like)	93760	A2BH40_S697	TB_04H-MOCK_00H	-0.268282	0.324229	0.689379	no	-0.268282	0.324229
A2BH40	Arid1a	AT rich interactive domain 1A (SWI-like)	93760	A2BH40_S770	TB_04H-MOCK_00H	-0.0427303	0.919535	0.97827	no	-0.0427303	0.919535
A2CG63	Arid4b	AT rich interactive domain 4B (RBP1-like)	94246	A2CG63_S839	TB_04H-MOCK_00H	-1.11635	0.372711	0.731741	no	-1.11635	0.372711
A3KGS3	Ralgapa2	Ral GTPase activating protein, alpha subunit 2 (catalytic)	241694	A3KGS3_S486	TB_04H-MOCK_00H	0.109205	0.570999	0.850872	no	0.109205	0.570999
A3KGS3	Ralgapa2	Ral GTPase activating protein, alpha subunit 2 (catalytic)	241694	A3KGS3_S696	TB_04H-MOCK_00H	-0.382736	0.260671	0.633536	no	-0.382736	0.260671
A3KGS3	Ralgapa2	Ral GTPase activating protein, alpha subunit 2 (catalytic)	241694	A3KGS3_S765	TB_04H-MOCK_00H	-0.622092	0.0125504	0.140902	no	-0.622092	0.0125504
A3KGS3	Ralgapa2	Ral GTPase activating protein, alpha subunit 2 (catalytic)	241694	A3KGS3_S818	TB_04H-MOCK_00H	#NUM!		0	yes	3.99385	0.0242845
A3KGS3	Ralgapa2	Ral GTPase activating protein, alpha subunit 2 (catalytic)	241694	A3KGS3_S818;A3KGS3_S819	TB_04H-MOCK_00H	0.554538	0.412754	0.760904	no	0.554538	0.412754
A3KGS3	Ralgapa2	Ral GTPase activating protein, alpha subunit 2 (catalytic)	241694	A3KGS3_S818;A3KGS3_S820	TB_04H-MOCK_00H	#NUM!		0	yes	4.2825	0.0209731
A3KGS3	Ralgapa2	Ral GTPase activating protein, alpha subunit 2 (catalytic)	241694	A3KGS3_S819	TB_04H-MOCK_00H	#NUM!		0	yes	4.13537	0.0396869
A3KGS3	Ralgapa2	Ral GTPase activating protein, alpha subunit 2 (catalytic)	241694	A3KGS3_S819;A3KGS3_S820	TB_04H-MOCK_00H	2.02016	0.037353	0.258136	no	2.02016	0.037353
A3KGS3	Ralgapa2	Ral GTPase activating protein, alpha subunit 2 (catalytic)	241694	A3KGS3_S820	TB_04H-MOCK_00H	1.08202	0.130382	0.471311	no	1.08202	0.130382
A6H5X4	Phf11d	PHD finger protein 11D	219132	A6H5X4_S169	TB_04H-MOCK_00H	-0.568341	0.0958881	0.410705	no	-0.568341	0.0958881
A6H5X4	Phf11d	PHD finger protein 11D	219132	A6H5X4_S17	TB_04H-MOCK_00H	-0.469626	0.226739	0.597794	no	-0.469626	0.226739
A6H5X4	Phf11d	PHD finger protein 11D	219132	A6H5X4_S323	TB_04H-MOCK_00H	-0.579187	0.202272	0.56847	no	-0.579187	0.202272
A6H5X4	Phf11d	PHD finger protein 11D	219132	A6H5X4_S326	TB_04H-MOCK_00H	-0.0522027	0.837232	0.957177	no	-0.0522027	0.837232
A6H5X4	Phf11d	PHD finger protein 11D	219132	A6H5X4_S333;A6H5X4_S336	TB_04H-MOCK_00H	-0.849892	0.375154	0.733256	no	-0.849892	0.375154
A6H5X4	Phf11d	PHD finger protein 11D	219132	A6H5X4_S336	TB_04H-MOCK_00H	-0.529249	0.310522	0.676447	no	-0.529249	0.310522
A6H619	Phrf1	PHD and ring finger domains 1	101471	A6H619_S1201	TB_04H-MOCK_00H	#NUM!		0	yes	3.65837	0.0340095
A6H619	Phrf1	PHD and ring finger domains 1	101471	A6H619_S864	TB_04H-MOCK_00H	-0.177329	0.556495	0.845092	no	-0.177329	0.556495
A6H619	Phrf1	PHD and ring finger domains 1	101471	A6H619_S867	TB_04H-MOCK_00H	0.0200291	0.934266	0.981846	no	0.0200291	0.934266
A6H619	Phrf1	PHD and ring finger domains 1	101471	A6H619_S914	TB_04H-MOCK_00H	0.524573	0.201362	0.567341	no	0.524573	0.201362
A6H8H2	Dennd4c	DENN/MADD domain containing 4C	329877	A6H8H2_S1043	TB_04H-MOCK_00H	0.0209517	0.952041	0.984204	no	0.0209517	0.952041
A6H8H2	Dennd4c	DENN/MADD domain containing 4C	329877	A6H8H2_S1058	TB_04H-MOCK_00H	-0.0105935	0.985671	0.995274	no	-0.0105935	0.985671
A6H8H2	Dennd4c	DENN/MADD domain containing 4C	329877	A6H8H2_S1087	TB_04H-MOCK_00H	#NUM!		0	yes	8.27281	0.0349342
A6H8H2	Dennd4c	DENN/MADD domain containing 4C	329877	A6H8H2_S1096	TB_04H-MOCK_00H	0.638433	0.548664	0.843798	no	0.638433	0.548664
A6H8H2	Dennd4c	DENN/MADD domain containing 4C	329877	A6H8H2_S1215	TB_04H-MOCK_00H	1.26621	0.00429371	0.0733722	no	1.26621	0.00429371
A6H8H2	Dennd4c	DENN/MADD domain containing 4C	329877	A6H8H2_S1221	TB_04H-MOCK_00H	0.972316	0.0233561	0.197252	no	0.972316	0.0233561
A6H8H2	Dennd4c	DENN/MADD domain containing 4C	329877	A6H8H2_S1240	TB_04H-MOCK_00H	#NUM!		0	yes	5.55276	0.0362706
A6H8H2	Dennd4c	DENN/MADD domain containing 4C	329877	A6H8H2_S1246	TB_04H-MOCK_00H	0.44971	0.591463	0.862757	no	0.44971	0.591463
A6H8H2	Dennd4c	DENN/MADD domain containing 4C	329877	A6H8H2_S1261	TB_04H-MOCK_00H	1.93353	0.168007	0.526052	no	1.93353	0.168007
A6H8H2	Dennd4c	DENN/MADD domain containing 4C	329877	A6H8H2_S1272	TB_04H-MOCK_00H	0.170135	0.62017	0.873309	no	0.170135	0.62017
A6H8H2	Dennd4c	DENN/MADD domain containing 4C	329877	A6H8H2_S1310	TB_04H-MOCK_00H	0.104486	0.913968	0.977565	no	0.104486	0.913968
A6H8H2	Dennd4c	DENN/MADD domain containing 4C	329877	A6H8H2_S1321	TB_04H-MOCK_00H	0.18033	0.793649	0.942408	no	0.18033	0.793649
A6H8H2	Dennd4c	DENN/MADD domain containing 4C	329877	A6H8H2_S1620	TB_04H-MOCK_00H	#NUM!		0	yes	4.98325	0.0355441
A6H8H2	Dennd4c	DENN/MADD domain containing 4C	329877	A6H8H2_S720	TB_04H-MOCK_00H	-0.665743	0.0356698	0.253425	no	-0.665743	0.0356698
A6H8H2	Dennd4c	DENN/MADD domain containing 4C	329877	A6H8H2_S740	TB_04H-MOCK_00H	1.82618	0.0377706	0.260202	no	1.82618	0.0377706
A6H8H2	Dennd4c	DENN/MADD domain containing 4C	329877	A6H8H2_S971	TB_04H-MOCK_00H	0.0150591	0.96583	0.987443	no	0.0150591	0.96583
A6H8H2	Dennd4c	DENN/MADD domain containing 4C	329877	A6H8H2_T1082	TB_04H-MOCK_00H	1.71272	9.32724e-05	0.00487015	no	1.71272	9.32724e-05
A6H8H2	Dennd4c	DENN/MADD domain containing 4C	329877	A6H8H2_T1086	TB_04H-MOCK_00H	0.865634	0.00583995	0.0884314	no	0.865634	0.00583995
A6H8H2	Dennd4c	DENN/MADD domain containing 4C	329877	A6H8H2_T1094	TB_04H-MOCK_00H	#NUM!		0	yes	-6.35226	0.0179061
A6H8H2	Dennd4c	DENN/MADD domain containing 4C	329877	A6H8H2_T738	TB_04H-MOCK_00H	-0.217561	0.834426	0.956679	no	-0.217561	0.834426
A6H8H2	Dennd4c	DENN/MADD domain containing 4C	329877	A6H8H2_T966;A6H8H2_S971	TB_04H-MOCK_00H	-0.502204	0.350897	0.710323	no	-0.502204	0.350897
A6H8H2	Dennd4c	DENN/MADD domain containing 4C	329877	A6H8H2_T966;A6H8H2_T973	TB_04H-MOCK_00H	2.07784	0.427	0.766673	no	2.07784	0.427
A6H8H2	Dennd4c	DENN/MADD domain containing 4C	329877	A6H8H2_T973	TB_04H-MOCK_00H	-0.70729	0.0954991	0.410158	no	-0.70729	0.0954991
A6X8Z5	Arhgap31	Rho GTPase activating protein 31	12549	A6X8Z5_S1163	TB_04H-MOCK_00H	-0.331567	0.309937	0.676447	no	-0.331567	0.309937
A6X8Z5	Arhgap31	Rho GTPase activating protein 31	12549	A6X8Z5_S1413	TB_04H-MOCK_00H	1.05401	0.0415889	0.272194	no	1.05401	0.0415889
A6X8Z5	Arhgap31	Rho GTPase activating protein 31	12549	A6X8Z5_S323	TB_04H-MOCK_00H	0.447153	0.0786414	0.372485	no	0.447153	0.0786414
A6X8Z5	Arhgap31	Rho GTPase activating protein 31	12549	A6X8Z5_S343;A6X8Z5_S346	TB_04H-MOCK_00H	0.452761	0.517215	0.828931	no	0.452761	0.517215
A6X8Z5	Arhgap31	Rho GTPase activating protein 31	12549	A6X8Z5_S346	TB_04H-MOCK_00H	-0.224652	0.554033	0.844775	no	-0.224652	0.554033
A6X8Z5	Arhgap31	Rho GTPase activating protein 31	12549	A6X8Z5_S464	TB_04H-MOCK_00H	0.961253	0.0060911	0.0912832	no	0.961253	0.0060911
A6X8Z5	Arhgap31	Rho GTPase activating protein 31	12549	A6X8Z5_S765	TB_04H-MOCK_00H	1.11745	0.0785069	0.372126	no	1.11745	0.0785069
A6X8Z5	Arhgap31	Rho GTPase activating protein 31	12549	A6X8Z5_T666	TB_04H-MOCK_00H	#NUM!		0	yes	4.51458	0.0286843
A6X919	Dpy19l1	dpy-19-like 1 (C. elegans)	244745	A6X919_S19	TB_04H-MOCK_00H	-0.145495	0.519493	0.830063	no	-0.145495	0.519493
A6X919	Dpy19l1	dpy-19-like 1 (C. elegans)	244745	A6X919_S22	TB_04H-MOCK_00H	0.300934	0.311928	0.676771	no	0.300934	0.311928
A6X919	Dpy19l1	dpy-19-like 1 (C. elegans)	244745	A6X919_S23	TB_04H-MOCK_00H	0.121993	0.837169	0.957177	no	0.121993	0.837169
A6X919	Dpy19l1	dpy-19-like 1 (C. elegans)	244745	A6X919_S28	TB_04H-MOCK_00H	-0.711087	0.329016	0.692449	no	-0.711087	0.329016
B1AVH7	Tbc1d2	TBC1 domain family, member 2	381605	B1AVH7_S903;B1AVH7_S922	TB_04H-MOCK_00H	-1.82431	0.0045402	0.0756795	no	-1.82431	0.0045402
B1AVH7	Tbc1d2	TBC1 domain family, member 2	381605	B1AVH7_S914	TB_04H-MOCK_00H	0.517416	0.282163	0.650211	no	0.517416	0.282163
B1AVY7	Kif16b	kinesin family member 16B	16558	B1AVY7_S662	TB_04H-MOCK_00H	0.0182004	0.970201	0.989896	no	0.0182004	0.970201
B1AVY7	Kif16b	kinesin family member 16B	16558	B1AVY7_S838	TB_04H-MOCK_00H	-0.735051	0.0115791	0.135069	no	-0.735051	0.0115791
B1AXH1	Nhsl2	NHS-like 2	100042480	B1AXH1_S134	TB_04H-MOCK_00H	0.105378	0.704573	0.904466	no	0.105378	0.704573
B1AXH1	Nhsl2	NHS-like 2	100042480	B1AXH1_S170	TB_04H-MOCK_00H	-0.253982	0.300805	0.667352	no	-0.253982	0.300805
B1AXH1	Nhsl2	NHS-like 2	100042480	B1AXH1_S435	TB_04H-MOCK_00H	-0.268936	0.785803	0.940734	no	-0.268936	0.785803
B1AXH1	Nhsl2	NHS-like 2	100042480	B1AXH1_T447	TB_04H-MOCK_00H	0.0479303	0.954386	0.985033	no	0.0479303	0.954386
B1AY10	Nfx1	nuclear transcription factor, X-box binding 1	74164	B1AY10_S137	TB_04H-MOCK_00H	-0.557372	0.434144	0.772163	no	-0.557372	0.434144
B1AY10	Nfx1	nuclear transcription factor, X-box binding 1	74164	B1AY10_S149;B1AY10_S151	TB_04H-MOCK_00H	0.07321	0.949879	0.983825	no	0.07321	0.949879
B1AY10	Nfx1	nuclear transcription factor, X-box binding 1	74164	B1AY10_S49;B1AY10_S50	TB_04H-MOCK_00H	-0.73211	0.0759437	0.365229	no	-0.73211	0.0759437
B1AY13	Usp24	ubiquitin specific peptidase 24	329908	B1AY13_S1136	TB_04H-MOCK_00H	#NUM!		0	yes	5.31938	0.0338763
B1AY13	Usp24	ubiquitin specific peptidase 24	329908	B1AY13_S1138	TB_04H-MOCK_00H	0.440227	0.0388712	0.263915	no	0.440227	0.0388712
B1AY13	Usp24	ubiquitin specific peptidase 24	329908	B1AY13_S1282	TB_04H-MOCK_00H	0.821026	0.024607	0.201606	no	0.821026	0.024607
B1AY13	Usp24	ubiquitin specific peptidase 24	329908	B1AY13_S1296	TB_04H-MOCK_00H	1.52026	4.26174e-05	0.0029469	no	1.52026	4.26174e-05
B1AY13	Usp24	ubiquitin specific peptidase 24	329908	B1AY13_S1368	TB_04H-MOCK_00H	0.29526	0.642741	0.882023	no	0.29526	0.642741
B1AY13	Usp24	ubiquitin specific peptidase 24	329908	B1AY13_S2044	TB_04H-MOCK_00H	0.277212	0.280179	0.649098	no	0.277212	0.280179
B1AZA5	Tmem245	transmembrane protein 245	242474	B1AZA5_S12	TB_04H-MOCK_00H	1.35282	0.0146015	0.151519	no	1.35282	0.0146015
B1AZA5	Tmem245	transmembrane protein 245	242474	B1AZA5_S323	TB_04H-MOCK_00H	0.317784	0.562121	0.847524	no	0.317784	0.562121
B1AZA5	Tmem245	transmembrane protein 245	242474	B1AZA5_S326	TB_04H-MOCK_00H	#NUM!		0	yes	-4.50369	0.0371061
B1AZI6	Thoc2	THO complex 2	331401	B1AZI6_S1199;B1AZI6_S1212	TB_04H-MOCK_00H	-0.553812	0.59787	0.8669	no	-0.553812	0.59787
B1AZI6	Thoc2	THO complex 2	331401	B1AZI6_S1217;B1AZI6_S1219	TB_04H-MOCK_00H	-1.59836	0.0701785	0.350307	no	-1.59836	0.0701785
B1AZI6	Thoc2	THO complex 2	331401	B1AZI6_S1390	TB_04H-MOCK_00H	0.771098	0.0255222	0.206532	no	0.771098	0.0255222
B1AZI6	Thoc2	THO complex 2	331401	B1AZI6_S1419	TB_04H-MOCK_00H	-0.776076	0.444054	0.780297	no	-0.776076	0.444054
B1AZP2	Dlgap4	DLG associated protein 4	228836	B1AZP2_S973	TB_04H-MOCK_00H	-0.137389	0.73044	0.919013	no	-0.137389	0.73044
B2RQC6	Cad	carbamoyl-phosphate synthetase 2, aspartate transcarbamylase, and dihydroorotase	69719	B2RQC6_S1406	TB_04H-MOCK_00H	-2.41426	5.97859e-05	0.00372548	no	-2.41426	5.97859e-05
B2RQC6	Cad	carbamoyl-phosphate synthetase 2, aspartate transcarbamylase, and dihydroorotase	69719	B2RQC6_S1823	TB_04H-MOCK_00H	-0.986125	0.457981	0.790621	no	-0.986125	0.457981
B2RQC6	Cad	carbamoyl-phosphate synthetase 2, aspartate transcarbamylase, and dihydroorotase	69719	B2RQC6_S1859	TB_04H-MOCK_00H	1.06941	0.295304	0.6633	no	1.06941	0.295304
B2RRE7	Otud4	OTU domain containing 4	73945	B2RRE7_S1016;B2RRE7_S1017	TB_04H-MOCK_00H	-1.67175	0.0649164	0.337329	no	-1.67175	0.0649164
B2RRE7	Otud4	OTU domain containing 4	73945	B2RRE7_S970	TB_04H-MOCK_00H	0.190631	0.762043	0.930641	no	0.190631	0.762043
B2RUJ5	Apba1	amyloid beta (A4) precursor protein binding, family A, member 1	319924	B2RUJ5_T85;B2RUJ5_S87	TB_04H-MOCK_00H	-0.893721	0.241111	0.612459	no	-0.893721	0.241111
B2RUP2	Unc13d	unc-13 homolog D	70450	B2RUP2_S149	TB_04H-MOCK_00H	-0.309821	0.239992	0.611754	no	-0.309821	0.239992
B2RUR8	Otud7b	OTU domain containing 7B	229603	B2RUR8_S100	TB_04H-MOCK_00H	-0.225645	0.331897	0.694734	no	-0.225645	0.331897
B2RUR8	Otud7b	OTU domain containing 7B	229603	B2RUR8_S460;B2RUR8_S464	TB_04H-MOCK_00H	-0.132493	0.679024	0.897163	no	-0.132493	0.679024
B2RUR8	Otud7b	OTU domain containing 7B	229603	B2RUR8_S460;B2RUR8_T461	TB_04H-MOCK_00H	1.44047	0.417566	0.763002	no	1.44047	0.417566
B2RUR8	Otud7b	OTU domain containing 7B	229603	B2RUR8_S464	TB_04H-MOCK_00H	-0.152386	0.833806	0.956679	no	-0.152386	0.833806
B2RUR8	Otud7b	OTU domain containing 7B	229603	B2RUR8_S464;B2RUR8_S467	TB_04H-MOCK_00H	0.402604	0.567635	0.848744	no	0.402604	0.567635
B2RUR8	Otud7b	OTU domain containing 7B	229603	B2RUR8_S467	TB_04H-MOCK_00H	#NUM!		0	yes	-5.90492	0.0102669
B2RUR8	Otud7b	OTU domain containing 7B	229603	B2RUR8_S508	TB_04H-MOCK_00H	0.29846	0.317421	0.683349	no	0.29846	0.317421
B2RWS6	Ep300	E1A binding protein p300	328572	B2RWS6_S2312;B2RWS6_S2322	TB_04H-MOCK_00H	-0.337292	0.554859	0.844901	no	-0.337292	0.554859
B2RWS6	Ep300	E1A binding protein p300	328572	B2RWS6_S2323	TB_04H-MOCK_00H	-0.399195	0.602188	0.868331	no	-0.399195	0.602188
B2RWS6	Ep300	E1A binding protein p300	328572	B2RWS6_S497	TB_04H-MOCK_00H	#NUM!		0	yes	-3.82122	0.0248214
B2RX12	Abcc3	ATP-binding cassette, sub-family C (CFTR/MRP), member 3	76408	B2RX12_S903;B2RX12_S906	TB_04H-MOCK_00H	0.238816	0.680494	0.897549	no	0.238816	0.680494
B2RX12	Abcc3	ATP-binding cassette, sub-family C (CFTR/MRP), member 3	76408	B2RX12_S903;B2RX12_S907	TB_04H-MOCK_00H	-0.813742	0.583359	0.858019	no	-0.813742	0.583359
B2RX12	Abcc3	ATP-binding cassette, sub-family C (CFTR/MRP), member 3	76408	B2RX12_S904;B2RX12_S906	TB_04H-MOCK_00H	0.140491	0.842379	0.959157	no	0.140491	0.842379
B2RX12	Abcc3	ATP-binding cassette, sub-family C (CFTR/MRP), member 3	76408	B2RX12_S906	TB_04H-MOCK_00H	-1.53444	0.000465264	0.0161104	no	-1.53444	0.000465264
B2RX12	Abcc3	ATP-binding cassette, sub-family C (CFTR/MRP), member 3	76408	B2RX12_S923	TB_04H-MOCK_00H	-0.391116	0.671808	0.892842	no	-0.391116	0.671808
B2RXS4	Plxnb2	plexin B2	140570	B2RXS4_S1568	TB_04H-MOCK_00H	#NUM!		0	yes	5.7466	0.0327205
B2RY04	Dock5	dedicator of cytokinesis 5	68813	B2RY04_S1765	TB_04H-MOCK_00H	1.26791	0.0698847	0.350282	no	1.26791	0.0698847
B2RY04	Dock5	dedicator of cytokinesis 5	68813	B2RY04_S1788;B2RY04_T1793	TB_04H-MOCK_00H	1.23891	0.00774905	0.10599	no	1.23891	0.00774905
B2RY04	Dock5	dedicator of cytokinesis 5	68813	B2RY04_T1811	TB_04H-MOCK_00H	#NUM!		0	yes	9.11309	0.0139409
B2RY56	Rbm25	RNA binding motif protein 25	67039	B2RY56_S670	TB_04H-MOCK_00H	0.168571	0.819645	0.950881	no	0.168571	0.819645
B2RY56	Rbm25	RNA binding motif protein 25	67039	B2RY56_S672	TB_04H-MOCK_00H	-0.676032	0.11792	0.448955	no	-0.676032	0.11792
B7ZCC9	B7ZCC9			B7ZCC9_S1352	TB_04H-MOCK_00H	0.233582	0.91835	0.977823	no	0.233582	0.91835
B7ZCC9	B7ZCC9			B7ZCC9_S1546;B7ZCC9_T1550	TB_04H-MOCK_00H	-0.61669	0.206675	0.573234	no	-0.61669	0.206675
B7ZCC9	B7ZCC9			B7ZCC9_S427;B7ZCC9_S428	TB_04H-MOCK_00H	2.63449	0.123367	0.458036	no	2.63449	0.123367
B7ZCC9	B7ZCC9			B7ZCC9_T1238;B7ZCC9_S1241;B7ZCC9_T1245;B7ZCC9_T1249;B7ZCC9_S1255	TB_04H-MOCK_00H	0.532038	0.693371	0.902233	no	0.532038	0.693371
B7ZCC9	B7ZCC9			B7ZCC9_T1350;B7ZCC9_S1352	TB_04H-MOCK_00H	4.14753	0.0184263	0.171528	no	4.14753	0.0184263
B9EJ86	Osbpl8	oxysterol binding protein-like 8	237542	B9EJ86_S13	TB_04H-MOCK_00H	-0.0823335	0.845428	0.95964	no	-0.0823335	0.845428
B9EJ86	Osbpl8	oxysterol binding protein-like 8	237542	B9EJ86_S63	TB_04H-MOCK_00H	#NUM!		0	yes	4.62553	0.0490884
B9EJ86	Osbpl8	oxysterol binding protein-like 8	237542	B9EJ86_S65	TB_04H-MOCK_00H	-0.310664	0.424575	0.765389	no	-0.310664	0.424575
B9EJ86	Osbpl8	oxysterol binding protein-like 8	237542	B9EJ86_S65;B9EJ86_S68	TB_04H-MOCK_00H	0.147316	0.793814	0.942408	no	0.147316	0.793814
B9EJ86	Osbpl8	oxysterol binding protein-like 8	237542	B9EJ86_S798;B9EJ86_S799;B9EJ86_S807	TB_04H-MOCK_00H	0.68522	0.798521	0.943511	no	0.68522	0.798521
B9EJ86	Osbpl8	oxysterol binding protein-like 8	237542	B9EJ86_S798;B9EJ86_S807;B9EJ86_S814	TB_04H-MOCK_00H	0.387767	0.669129	0.891332	no	0.387767	0.669129
B9EJ86	Osbpl8	oxysterol binding protein-like 8	237542	B9EJ86_S799;B9EJ86_S807	TB_04H-MOCK_00H	-1.07284	0.382551	0.7398	no	-1.07284	0.382551
B9EJ86	Osbpl8	oxysterol binding protein-like 8	237542	B9EJ86_S799;B9EJ86_S807;B9EJ86_S808	TB_04H-MOCK_00H	0.155942	0.94123	0.982786	no	0.155942	0.94123
B9EJ86	Osbpl8	oxysterol binding protein-like 8	237542	B9EJ86_S799;B9EJ86_S807;B9EJ86_S810	TB_04H-MOCK_00H	-1.84264	0.283119	0.651046	no	-1.84264	0.283119
B9EJ86	Osbpl8	oxysterol binding protein-like 8	237542	B9EJ86_S799;B9EJ86_S808;B9EJ86_S810	TB_04H-MOCK_00H	#NUM!		0	yes	-9.39207	0.0301478
B9EJ86	Osbpl8	oxysterol binding protein-like 8	237542	B9EJ86_S807;B9EJ86_S808	TB_04H-MOCK_00H	-0.532819	0.413059	0.760996	no	-0.532819	0.413059
B9EJ86	Osbpl8	oxysterol binding protein-like 8	237542	B9EJ86_S807;B9EJ86_S808;B9EJ86_S810	TB_04H-MOCK_00H	-0.259781	0.85322	0.962928	no	-0.259781	0.85322
B9EJ86	Osbpl8	oxysterol binding protein-like 8	237542	B9EJ86_S807;B9EJ86_S810	TB_04H-MOCK_00H	-1.28534	0.599224	0.867388	no	-1.28534	0.599224
B9EJ86	Osbpl8	oxysterol binding protein-like 8	237542	B9EJ86_S808;B9EJ86_S810	TB_04H-MOCK_00H	-1.49135	0.0878367	0.392311	no	-1.49135	0.0878367
B9EJ86	Osbpl8	oxysterol binding protein-like 8	237542	B9EJ86_S97	TB_04H-MOCK_00H	-0.0173263	0.978849	0.992339	no	-0.0173263	0.978849
B9EJ86	Osbpl8	oxysterol binding protein-like 8	237542	B9EJ86_T54	TB_04H-MOCK_00H	0.322841	0.446321	0.782607	no	0.322841	0.446321
B9EKI3	Tmf1	TATA element modulatory factor 1	232286	B9EKI3_S340	TB_04H-MOCK_00H	0.342869	0.14518	0.495267	no	0.342869	0.14518
B9EKI3	Tmf1	TATA element modulatory factor 1	232286	B9EKI3_S653	TB_04H-MOCK_00H	0.746222	0.244261	0.616133	no	0.746222	0.244261
B9EKI3	Tmf1	TATA element modulatory factor 1	232286	B9EKI3_S7;B9EKI3_S10;B9EKI3_S11	TB_04H-MOCK_00H	0.303518	0.461958	0.793114	no	0.303518	0.461958
D0QMC3	Mndal	myeloid nuclear differentiation antigen like	100040462	D0QMC3_S276	TB_04H-MOCK_00H	0.150363	0.647151	0.884973	no	0.150363	0.647151
D0QMC3	Mndal	myeloid nuclear differentiation antigen like	100040462	D0QMC3_S281	TB_04H-MOCK_00H	0.596892	0.387179	0.742639	no	0.596892	0.387179
D3YXK1	Samd1	sterile alpha motif domain containing 1	666704	D3YXK1_S150	TB_04H-MOCK_00H	-0.486293	0.409117	0.758528	no	-0.486293	0.409117
D3YXK2	Safb	scaffold attachment factor B	224903	D3YXK2_S20	TB_04H-MOCK_00H	-0.885424	0.000159208	0.00717416	no	-0.885424	0.000159208
D3YXK2	Safb	scaffold attachment factor B	224903	D3YXK2_S366	TB_04H-MOCK_00H	0.31123	0.393903	0.7473	no	0.31123	0.393903
D3YXK2	Safb	scaffold attachment factor B	224903	D3YXK2_S465	TB_04H-MOCK_00H	0.0663598	0.879263	0.969942	no	0.0663598	0.879263
D3YXK2	Safb	scaffold attachment factor B	224903	D3YXK2_S626	TB_04H-MOCK_00H	-0.580864	0.159684	0.512469	no	-0.580864	0.159684
D3YXK2	Safb	scaffold attachment factor B	224903	D3YXK2_S829	TB_04H-MOCK_00H	#NUM!		0	yes	-8.74927	0.0466415
D3YXK2	Safb	scaffold attachment factor B	224903	D3YXK2_T28	TB_04H-MOCK_00H	-0.6983	0.202903	0.56847	no	-0.6983	0.202903
D3YZP9	Ccdc6	coiled-coil domain containing 6	76551	D3YZP9_S233;D3YZP9_S237	TB_04H-MOCK_00H	1.12944	0.0200918	0.181833	no	1.12944	0.0200918
D3YZP9	Ccdc6	coiled-coil domain containing 6	76551	D3YZP9_S344;D3YZP9_S360	TB_04H-MOCK_00H	0.810558	0.155082	0.50786	no	0.810558	0.155082
D3YZP9	Ccdc6	coiled-coil domain containing 6	76551	D3YZP9_S356;D3YZP9_S360;D3YZP9_S364	TB_04H-MOCK_00H	-0.670653	0.275561	0.645624	no	-0.670653	0.275561
D3Z6Q9	D3Z6Q9			D3Z6Q9_S412	TB_04H-MOCK_00H	-0.0855155	0.88905	0.9723	no	-0.0855155	0.88905
D3Z6Q9	D3Z6Q9			D3Z6Q9_S420	TB_04H-MOCK_00H	-0.362828	0.233492	0.607194	no	-0.362828	0.233492
D3Z6Q9	D3Z6Q9			D3Z6Q9_S422	TB_04H-MOCK_00H	#NUM!		0	yes	-5.10102	0.0401271
D3Z6Q9	D3Z6Q9			D3Z6Q9_S430	TB_04H-MOCK_00H	1.43749	0.0603697	0.327206	no	1.43749	0.0603697
D3Z6Q9	D3Z6Q9			D3Z6Q9_S443	TB_04H-MOCK_00H	-0.0202532	0.9501	0.983899	no	-0.0202532	0.9501
E1U8D0	E1U8D0			E1U8D0_S1015	TB_04H-MOCK_00H	-0.150195	0.478571	0.804219	no	-0.150195	0.478571
E2JF22	E2JF22			E2JF22_S1385	TB_04H-MOCK_00H	1.01955	0.0954626	0.410158	no	1.01955	0.0954626
E2JF22	E2JF22			E2JF22_S1646	TB_04H-MOCK_00H	0.565463	0.00456569	0.0756795	no	0.565463	0.00456569
E2JF22	E2JF22			E2JF22_S1864	TB_04H-MOCK_00H	-0.474243	0.699863	0.903647	no	-0.474243	0.699863
E2JF22	E2JF22			E2JF22_T382	TB_04H-MOCK_00H	#NUM!		0	yes	4.88307	0.032593
E9PVA8	Gcn1	GCN1 activator of EIF2AK4	231659	E9PVA8_S8;E9PVA8_T10	TB_04H-MOCK_00H	-1.02868	0.276739	0.645951	no	-1.02868	0.276739
E9PVX6	Mki67	antigen identified by monoclonal antibody Ki 67	17345	E9PVX6_S1152	TB_04H-MOCK_00H	0.479145	0.419837	0.764545	no	0.479145	0.419837
E9PVX6	Mki67	antigen identified by monoclonal antibody Ki 67	17345	E9PVX6_S287	TB_04H-MOCK_00H	#NUM!		0	yes	-4.04196	0.0181352
E9PVX6	Mki67	antigen identified by monoclonal antibody Ki 67	17345	E9PVX6_S2998;E9PVX6_S3004;E9PVX6_T3005;E9PVX6_T3009	TB_04H-MOCK_00H	#NUM!		0	yes	3.83025	0.0238657
E9PYL2	Prr12	proline rich 12	233210	E9PYL2_S1370;E9PYL2_S1372	TB_04H-MOCK_00H	-1.52562	0.0259182	0.20871	no	-1.52562	0.0259182
E9PYL2	Prr12	proline rich 12	233210	E9PYL2_S859	TB_04H-MOCK_00H	#NUM!		0	yes	-7.30579	0.0288447
E9PYL2	Prr12	proline rich 12	233210	E9PYL2_T1367;E9PYL2_S1370	TB_04H-MOCK_00H	0.0531159	0.953826	0.98493	no	0.0531159	0.953826
E9PYL2	Prr12	proline rich 12	233210	E9PYL2_T1555;E9PYL2_S1562	TB_04H-MOCK_00H	0.439935	0.267184	0.639435	no	0.439935	0.267184
E9Q1P8	Irf2bp2	interferon regulatory factor 2 binding protein 2	270110	E9Q1P8_S169	TB_04H-MOCK_00H	0.319066	0.276251	0.645951	no	0.319066	0.276251
E9Q1P8	Irf2bp2	interferon regulatory factor 2 binding protein 2	270110	E9Q1P8_S250	TB_04H-MOCK_00H	0.171529	0.783655	0.940129	no	0.171529	0.783655
E9Q1P8	Irf2bp2	interferon regulatory factor 2 binding protein 2	270110	E9Q1P8_S438;E9Q1P8_S439	TB_04H-MOCK_00H	-0.51242	0.427567	0.767311	no	-0.51242	0.427567
E9Q1P8	Irf2bp2	interferon regulatory factor 2 binding protein 2	270110	E9Q1P8_S438;E9Q1P8_S439;E9Q1P8_S443	TB_04H-MOCK_00H	1.50417	0.0701367	0.350307	no	1.50417	0.0701367
E9Q1P8	Irf2bp2	interferon regulatory factor 2 binding protein 2	270110	E9Q1P8_S438;E9Q1P8_S440	TB_04H-MOCK_00H	0.858406	0.320507	0.685951	no	0.858406	0.320507
E9Q1P8	Irf2bp2	interferon regulatory factor 2 binding protein 2	270110	E9Q1P8_S438;E9Q1P8_S440;E9Q1P8_S443	TB_04H-MOCK_00H	0.819085	0.519688	0.830063	no	0.819085	0.519688
E9Q1P8	Irf2bp2	interferon regulatory factor 2 binding protein 2	270110	E9Q1P8_S438;E9Q1P8_S443	TB_04H-MOCK_00H	-1.36409	0.0152319	0.154333	no	-1.36409	0.0152319
E9Q1P8	Irf2bp2	interferon regulatory factor 2 binding protein 2	270110	E9Q1P8_S439;E9Q1P8_S440	TB_04H-MOCK_00H	-0.0478375	0.925731	0.979176	no	-0.0478375	0.925731
E9Q1P8	Irf2bp2	interferon regulatory factor 2 binding protein 2	270110	E9Q1P8_S439;E9Q1P8_S443	TB_04H-MOCK_00H	0.490198	0.650623	0.886956	no	0.490198	0.650623
E9Q1P8	Irf2bp2	interferon regulatory factor 2 binding protein 2	270110	E9Q1P8_S440	TB_04H-MOCK_00H	#NUM!		0	yes	7.56347	0.0261159
E9Q1P8	Irf2bp2	interferon regulatory factor 2 binding protein 2	270110	E9Q1P8_S440;E9Q1P8_S443	TB_04H-MOCK_00H	0.766734	0.373367	0.732328	no	0.766734	0.373367
E9Q1P8	Irf2bp2	interferon regulatory factor 2 binding protein 2	270110	E9Q1P8_S71	TB_04H-MOCK_00H	1.50539	0.00708867	0.101164	no	1.50539	0.00708867
E9Q349	Wdr25	WD repeat domain 25	212198	E9Q349_Y7;E9Q349_S10	TB_04H-MOCK_00H	-1.1298	0.0656171	0.33885	no	-1.1298	0.0656171
E9Q394	Akap13	A kinase (PRKA) anchor protein 13	75547	E9Q394_S1611	TB_04H-MOCK_00H	#NUM!		0	yes	3.64303	0.0105845
E9Q394	Akap13	A kinase (PRKA) anchor protein 13	75547	E9Q394_S1819	TB_04H-MOCK_00H	#NUM!		0	yes	3.88945	0.0435713
E9Q394	Akap13	A kinase (PRKA) anchor protein 13	75547	E9Q394_S1820	TB_04H-MOCK_00H	#NUM!		0	yes	4.16538	0.0297864
E9Q394	Akap13	A kinase (PRKA) anchor protein 13	75547	E9Q394_S1869	TB_04H-MOCK_00H	0.664927	0.13126	0.473377	no	0.664927	0.13126
E9Q394	Akap13	A kinase (PRKA) anchor protein 13	75547	E9Q394_S1890;E9Q394_S1895	TB_04H-MOCK_00H	0.664199	0.151143	0.504301	no	0.664199	0.151143
E9Q394	Akap13	A kinase (PRKA) anchor protein 13	75547	E9Q394_S1892	TB_04H-MOCK_00H	0.269332	0.669143	0.891332	no	0.269332	0.669143
E9Q394	Akap13	A kinase (PRKA) anchor protein 13	75547	E9Q394_S1892;E9Q394_S1895	TB_04H-MOCK_00H	-0.484737	0.470091	0.798742	no	-0.484737	0.470091
E9Q394	Akap13	A kinase (PRKA) anchor protein 13	75547	E9Q394_S2530;E9Q394_S2531	TB_04H-MOCK_00H	0.225356	0.626424	0.876453	no	0.225356	0.626424
E9Q394	Akap13	A kinase (PRKA) anchor protein 13	75547	E9Q394_S2687	TB_04H-MOCK_00H	#NUM!		0	yes	4.76008	0.0425764
E9Q394	Akap13	A kinase (PRKA) anchor protein 13	75547	E9Q394_S2692	TB_04H-MOCK_00H	0.5736	0.0327591	0.239609	no	0.5736	0.0327591
E9Q394	Akap13	A kinase (PRKA) anchor protein 13	75547	E9Q394_S2692;E9Q394_S2697	TB_04H-MOCK_00H	#NUM!		0	yes	4.25092	0.0306931
E9Q394	Akap13	A kinase (PRKA) anchor protein 13	75547	E9Q394_T1818	TB_04H-MOCK_00H	1.28487	0.108519	0.433248	no	1.28487	0.108519
E9Q3L2	Pi4ka	phosphatidylinositol 4-kinase alpha	224020	E9Q3L2_S233	TB_04H-MOCK_00H	0.825041	0.683072	0.89781	no	0.825041	0.683072
E9Q3L2	Pi4ka	phosphatidylinositol 4-kinase alpha	224020	E9Q3L2_S259	TB_04H-MOCK_00H	-0.640119	0.253341	0.62401	no	-0.640119	0.253341
E9Q3L2	Pi4ka	phosphatidylinositol 4-kinase alpha	224020	E9Q3L2_S259;E9Q3L2_S260;E9Q3L2_S263	TB_04H-MOCK_00H	-1.19816	0.325876	0.690258	no	-1.19816	0.325876
E9Q3L2	Pi4ka	phosphatidylinositol 4-kinase alpha	224020	E9Q3L2_S259;E9Q3L2_S262	TB_04H-MOCK_00H	0.612368	0.429127	0.768549	no	0.612368	0.429127
E9Q3L2	Pi4ka	phosphatidylinositol 4-kinase alpha	224020	E9Q3L2_S259;E9Q3L2_S263	TB_04H-MOCK_00H	1.26445	0.0424039	0.274853	no	1.26445	0.0424039
E9Q3L2	Pi4ka	phosphatidylinositol 4-kinase alpha	224020	E9Q3L2_S260	TB_04H-MOCK_00H	#NUM!		0	yes	-6.22744	0.043938
E9Q3L2	Pi4ka	phosphatidylinositol 4-kinase alpha	224020	E9Q3L2_S260;E9Q3L2_S262	TB_04H-MOCK_00H	-0.386601	0.347252	0.707735	no	-0.386601	0.347252
E9Q3L2	Pi4ka	phosphatidylinositol 4-kinase alpha	224020	E9Q3L2_S260;E9Q3L2_S263	TB_04H-MOCK_00H	1.9245	0.0160282	0.159289	no	1.9245	0.0160282
E9Q3L2	Pi4ka	phosphatidylinositol 4-kinase alpha	224020	E9Q3L2_T258	TB_04H-MOCK_00H	-1.20988	0.0363154	0.255255	no	-1.20988	0.0363154
E9Q3L2	Pi4ka	phosphatidylinositol 4-kinase alpha	224020	E9Q3L2_T258;E9Q3L2_S259	TB_04H-MOCK_00H	-1.07872	0.079403	0.374207	no	-1.07872	0.079403
E9Q3L2	Pi4ka	phosphatidylinositol 4-kinase alpha	224020	E9Q3L2_T258;E9Q3L2_S259;E9Q3L2_S263	TB_04H-MOCK_00H	-0.271799	0.835751	0.956744	no	-0.271799	0.835751
E9Q3L2	Pi4ka	phosphatidylinositol 4-kinase alpha	224020	E9Q3L2_Y694;E9Q3L2_S695	TB_04H-MOCK_00H	-0.134215	0.758403	0.92979	no	-0.134215	0.758403
E9Q5F9	Setd2	SET domain containing 2	235626	E9Q5F9_S2053;E9Q5F9_S2055	TB_04H-MOCK_00H	#NUM!		0	yes	6.82662	0.0174417
E9Q5F9	Setd2	SET domain containing 2	235626	E9Q5F9_S2053;E9Q5F9_S2058	TB_04H-MOCK_00H	-0.148994	0.816772	0.949421	no	-0.148994	0.816772
E9Q5F9	Setd2	SET domain containing 2	235626	E9Q5F9_S532	TB_04H-MOCK_00H	0.149947	0.494282	0.814288	no	0.149947	0.494282
E9Q5F9	Setd2	SET domain containing 2	235626	E9Q5F9_S614	TB_04H-MOCK_00H	0.458093	0.070355	0.350386	no	0.458093	0.070355
E9Q5F9	Setd2	SET domain containing 2	235626	E9Q5F9_S614;E9Q5F9_S618	TB_04H-MOCK_00H	-0.406961	0.350856	0.710323	no	-0.406961	0.350856
E9Q5F9	Setd2	SET domain containing 2	235626	E9Q5F9_S614;E9Q5F9_S624	TB_04H-MOCK_00H	0.892041	0.0225959	0.194325	no	0.892041	0.0225959
E9Q5F9	Setd2	SET domain containing 2	235626	E9Q5F9_T612	TB_04H-MOCK_00H	-0.46788	0.325736	0.690258	no	-0.46788	0.325736
E9Q5K9	Ythdc1	YTH domain containing 1	231386	E9Q5K9_S309	TB_04H-MOCK_00H	0.179989	0.392843	0.747185	no	0.179989	0.392843
E9Q5K9	Ythdc1	YTH domain containing 1	231386	E9Q5K9_S417	TB_04H-MOCK_00H	0.124709	0.937128	0.982221	no	0.124709	0.937128
E9Q634	Myo1e	myosin IE	71602	E9Q634_S1001	TB_04H-MOCK_00H	-0.396064	0.541637	0.841225	no	-0.396064	0.541637
E9Q634	Myo1e	myosin IE	71602	E9Q634_S1001;E9Q634_S1008	TB_04H-MOCK_00H	-0.162744	0.755761	0.92979	no	-0.162744	0.755761
E9Q634	Myo1e	myosin IE	71602	E9Q634_S1001;E9Q634_S1013	TB_04H-MOCK_00H	1.1201	0.318258	0.683651	no	1.1201	0.318258
E9Q6J5	Bod1l	biorientation of chromosomes in cell division 1-like	665775	E9Q6J5_S1676	TB_04H-MOCK_00H	1.03291	0.00250013	0.0522171	no	1.03291	0.00250013
E9Q6J5	Bod1l	biorientation of chromosomes in cell division 1-like	665775	E9Q6J5_S2001	TB_04H-MOCK_00H	0.137344	0.615496	0.871213	no	0.137344	0.615496
E9Q6J5	Bod1l	biorientation of chromosomes in cell division 1-like	665775	E9Q6J5_S2681	TB_04H-MOCK_00H	1.01338	0.0923533	0.402646	no	1.01338	0.0923533
E9Q6J5	Bod1l	biorientation of chromosomes in cell division 1-like	665775	E9Q6J5_S2892	TB_04H-MOCK_00H	-2.01764	0.00845919	0.11243	no	-2.01764	0.00845919
E9Q6J5	Bod1l	biorientation of chromosomes in cell division 1-like	665775	E9Q6J5_S2981;E9Q6J5_T2982;E9Q6J5_S2983	TB_04H-MOCK_00H	-2.33848	0.0605727	0.327206	no	-2.33848	0.0605727
E9Q6J5	Bod1l	biorientation of chromosomes in cell division 1-like	665775	E9Q6J5_S480;E9Q6J5_S482	TB_04H-MOCK_00H	-0.183442	0.831544	0.956254	no	-0.183442	0.831544
E9Q6J5	Bod1l	biorientation of chromosomes in cell division 1-like	665775	E9Q6J5_S656	TB_04H-MOCK_00H	0.488533	0.26788	0.63954	no	0.488533	0.26788
E9Q6J5	Bod1l	biorientation of chromosomes in cell division 1-like	665775	E9Q6J5_S795	TB_04H-MOCK_00H	0.216353	0.632021	0.877283	no	0.216353	0.632021
E9Q6J5	Bod1l	biorientation of chromosomes in cell division 1-like	665775	E9Q6J5_S896	TB_04H-MOCK_00H	0.192001	0.627387	0.876453	no	0.192001	0.627387
E9Q6J5	Bod1l	biorientation of chromosomes in cell division 1-like	665775	E9Q6J5_Y478	TB_04H-MOCK_00H	-0.465314	0.161722	0.514964	no	-0.465314	0.161722
E9Q784	Zc3h13	zinc finger CCCH type containing 13	67302	E9Q784_S1069	TB_04H-MOCK_00H	1.21605	0.156715	0.509846	no	1.21605	0.156715
E9Q784	Zc3h13	zinc finger CCCH type containing 13	67302	E9Q784_S1086;E9Q784_S1090;E9Q784_S1093	TB_04H-MOCK_00H	-2.01634	0.170749	0.529885	no	-2.01634	0.170749
E9Q784	Zc3h13	zinc finger CCCH type containing 13	67302	E9Q784_S1086;E9Q784_S1093	TB_04H-MOCK_00H	-2.6563	3.87134e-05	0.00276843	no	-2.6563	3.87134e-05
E9Q784	Zc3h13	zinc finger CCCH type containing 13	67302	E9Q784_S109	TB_04H-MOCK_00H	0.0859094	0.500252	0.816228	no	0.0859094	0.500252
E9Q784	Zc3h13	zinc finger CCCH type containing 13	67302	E9Q784_S1090;E9Q784_S1093	TB_04H-MOCK_00H	-2.37699	0.000168578	0.00737699	no	-2.37699	0.000168578
E9Q784	Zc3h13	zinc finger CCCH type containing 13	67302	E9Q784_S110	TB_04H-MOCK_00H	0.292583	0.77579	0.937999	no	0.292583	0.77579
E9Q784	Zc3h13	zinc finger CCCH type containing 13	67302	E9Q784_S1273;E9Q784_S1275	TB_04H-MOCK_00H	1.2221	0.378751	0.737894	no	1.2221	0.378751
E9Q784	Zc3h13	zinc finger CCCH type containing 13	67302	E9Q784_S204;E9Q784_S209	TB_04H-MOCK_00H	-0.977599	0.130042	0.470619	no	-0.977599	0.130042
E9Q784	Zc3h13	zinc finger CCCH type containing 13	67302	E9Q784_S207	TB_04H-MOCK_00H	#NUM!		0	yes	-5.66381	0.0489931
E9Q784	Zc3h13	zinc finger CCCH type containing 13	67302	E9Q784_S207;E9Q784_S209	TB_04H-MOCK_00H	-0.324717	0.391241	0.745955	no	-0.324717	0.391241
E9Q784	Zc3h13	zinc finger CCCH type containing 13	67302	E9Q784_S242	TB_04H-MOCK_00H	-0.192147	0.403193	0.753319	no	-0.192147	0.403193
E9Q784	Zc3h13	zinc finger CCCH type containing 13	67302	E9Q784_S316;E9Q784_S317	TB_04H-MOCK_00H	0.386326	0.6809	0.897724	no	0.386326	0.6809
E9Q784	Zc3h13	zinc finger CCCH type containing 13	67302	E9Q784_S316;E9Q784_S318	TB_04H-MOCK_00H	0.694599	0.356762	0.715591	no	0.694599	0.356762
E9Q784	Zc3h13	zinc finger CCCH type containing 13	67302	E9Q784_S316;E9Q784_S324	TB_04H-MOCK_00H	-0.269423	0.840236	0.958751	no	-0.269423	0.840236
E9Q784	Zc3h13	zinc finger CCCH type containing 13	67302	E9Q784_S369;E9Q784_S371;E9Q784_S379	TB_04H-MOCK_00H	#NUM!		0	yes	-6.15073	0.0334735
E9Q784	Zc3h13	zinc finger CCCH type containing 13	67302	E9Q784_S369;E9Q784_S371;E9Q784_S380	TB_04H-MOCK_00H	0.80077	0.243306	0.61542	no	0.80077	0.243306
E9Q784	Zc3h13	zinc finger CCCH type containing 13	67302	E9Q784_S953	TB_04H-MOCK_00H	-0.00123873	0.996697	0.999393	no	-0.00123873	0.996697
E9Q7F2	Rnf169	ring finger protein 169	108937	E9Q7F2_S277	TB_04H-MOCK_00H	-1.53671	0.0184026	0.171528	no	-1.53671	0.0184026
E9Q7F2	Rnf169	ring finger protein 169	108937	E9Q7F2_S390	TB_04H-MOCK_00H	0.0181595	0.9627	0.98653	no	0.0181595	0.9627
E9Q7F2	Rnf169	ring finger protein 169	108937	E9Q7F2_S44	TB_04H-MOCK_00H	-0.409827	0.436412	0.773543	no	-0.409827	0.436412
E9Q8D0	Dnajc21	DnaJ heat shock protein family (Hsp40) member C21	78244	E9Q8D0_S283	TB_04H-MOCK_00H	0.148848	0.716042	0.910728	no	0.148848	0.716042
E9Q8D0	Dnajc21	DnaJ heat shock protein family (Hsp40) member C21	78244	E9Q8D0_Y275	TB_04H-MOCK_00H	-0.0213445	0.94954	0.983825	no	-0.0213445	0.94954
E9Q8I9	Fry	FRY microtubule binding protein	320365	E9Q8I9_S1955	TB_04H-MOCK_00H	-1.18494	0.0824671	0.383428	no	-1.18494	0.0824671
F6ZDS4	Tpr	translocated promoter region, nuclear basket protein	108989	F6ZDS4_S2141	TB_04H-MOCK_00H	-0.0291956	0.923693	0.978741	no	-0.0291956	0.923693
F6ZDS4	Tpr	translocated promoter region, nuclear basket protein	108989	F6ZDS4_S2223	TB_04H-MOCK_00H	0.854626	0.00336189	0.0625605	no	0.854626	0.00336189
F6ZDS4	Tpr	translocated promoter region, nuclear basket protein	108989	F6ZDS4_T2110	TB_04H-MOCK_00H	0.335305	0.219951	0.590016	no	0.335305	0.219951
G3X9J0	Sipa1l3	signal-induced proliferation-associated 1 like 3	74206	G3X9J0_S1538	TB_04H-MOCK_00H	0.55142	0.0262101	0.210032	no	0.55142	0.0262101
G3X9J0	Sipa1l3	signal-induced proliferation-associated 1 like 3	74206	G3X9J0_S164	TB_04H-MOCK_00H	0.156929	0.526254	0.833244	no	0.156929	0.526254
G5E829	Atp2b1	ATPase, Ca++ transporting, plasma membrane 1	67972	G5E829_S1139	TB_04H-MOCK_00H	0.249806	0.780131	0.93864	no	0.249806	0.780131
G5E829	Atp2b1	ATPase, Ca++ transporting, plasma membrane 1	67972	G5E829_S1155	TB_04H-MOCK_00H	0.715502	0.0922936	0.402646	no	0.715502	0.0922936
G5E829	Atp2b1	ATPase, Ca++ transporting, plasma membrane 1	67972	G5E829_S1155;G5E829_T1165	TB_04H-MOCK_00H	0.316199	0.40976	0.758528	no	0.316199	0.40976
G5E829	Atp2b1	ATPase, Ca++ transporting, plasma membrane 1	67972	G5E829_S1177;G5E829_S1182	TB_04H-MOCK_00H	0.599539	0.291891	0.660316	no	0.599539	0.291891
G5E829	Atp2b1	ATPase, Ca++ transporting, plasma membrane 1	67972	G5E829_S1178;G5E829_S1182	TB_04H-MOCK_00H	0.874505	0.113749	0.443338	no	0.874505	0.113749
G5E829	Atp2b1	ATPase, Ca++ transporting, plasma membrane 1	67972	G5E829_S8	TB_04H-MOCK_00H	-0.954012	0.0519411	0.309249	no	-0.954012	0.0519411
G5E829	Atp2b1	ATPase, Ca++ transporting, plasma membrane 1	67972	G5E829_Y11	TB_04H-MOCK_00H	-0.532135	0.512397	0.825431	no	-0.532135	0.512397
G5E870	Trip12	thyroid hormone receptor interactor 12	14897	G5E870_S1409	TB_04H-MOCK_00H	0.572748	0.0701487	0.350307	no	0.572748	0.0701487
G5E870	Trip12	thyroid hormone receptor interactor 12	14897	G5E870_S310	TB_04H-MOCK_00H	-0.0257064	0.945511	0.982786	no	-0.0257064	0.945511
G5E870	Trip12	thyroid hormone receptor interactor 12	14897	G5E870_S312	TB_04H-MOCK_00H	0.0606461	0.794006	0.942408	no	0.0606461	0.794006
G5E870	Trip12	thyroid hormone receptor interactor 12	14897	G5E870_S75	TB_04H-MOCK_00H	-0.904894	0.264986	0.63672	no	-0.904894	0.264986
G5E870	Trip12	thyroid hormone receptor interactor 12	14897	G5E870_S77	TB_04H-MOCK_00H	-1.10406	0.00565486	0.086721	no	-1.10406	0.00565486
G5E870	Trip12	thyroid hormone receptor interactor 12	14897	G5E870_S77;G5E870_S85	TB_04H-MOCK_00H	0.225767	0.763577	0.931326	no	0.225767	0.763577
G5E870	Trip12	thyroid hormone receptor interactor 12	14897	G5E870_S77;G5E870_S87	TB_04H-MOCK_00H	-0.482246	0.112738	0.44149	no	-0.482246	0.112738
G5E870	Trip12	thyroid hormone receptor interactor 12	14897	G5E870_T1454;G5E870_S1460	TB_04H-MOCK_00H	#NUM!		0	yes	3.93627	0.0344119
G5E870	Trip12	thyroid hormone receptor interactor 12	14897	G5E870_T1459	TB_04H-MOCK_00H	-0.365155	0.591826	0.862757	no	-0.365155	0.591826
O08539	Bin1	bridging integrator 1	30948	O08539_S286;O08539_S296	TB_04H-MOCK_00H	1.12708	0.385198	0.740429	no	1.12708	0.385198
O08539	Bin1	bridging integrator 1	30948	O08539_S286;O08539_S296;O08539_S304	TB_04H-MOCK_00H	-0.646155	0.684508	0.898878	no	-0.646155	0.684508
O08539	Bin1	bridging integrator 1	30948	O08539_S286;O08539_S298	TB_04H-MOCK_00H	2.06083	0.171408	0.530194	no	2.06083	0.171408
O08539	Bin1	bridging integrator 1	30948	O08539_S286;O08539_S298;O08539_S304	TB_04H-MOCK_00H	#NUM!		0	yes	5.15245	0.0266978
O08539	Bin1	bridging integrator 1	30948	O08539_S286;O08539_S304	TB_04H-MOCK_00H	-1.21754	0.36573	0.724923	no	-1.21754	0.36573
O08539	Bin1	bridging integrator 1	30948	O08539_S296	TB_04H-MOCK_00H	0.0253177	0.974646	0.99076	no	0.0253177	0.974646
O08539	Bin1	bridging integrator 1	30948	O08539_S296;O08539_S298	TB_04H-MOCK_00H	0.698315	0.197	0.560736	no	0.698315	0.197
O08539	Bin1	bridging integrator 1	30948	O08539_S296;O08539_S298;O08539_S304	TB_04H-MOCK_00H	0.00694211	0.993978	0.997922	no	0.00694211	0.993978
O08539	Bin1	bridging integrator 1	30948	O08539_S296;O08539_S304	TB_04H-MOCK_00H	0.0275129	0.9426	0.982786	no	0.0275129	0.9426
O08539	Bin1	bridging integrator 1	30948	O08539_S298	TB_04H-MOCK_00H	-0.953219	0.124286	0.460406	no	-0.953219	0.124286
O08539	Bin1	bridging integrator 1	30948	O08539_S298;O08539_S304	TB_04H-MOCK_00H	0.446726	0.377943	0.736736	no	0.446726	0.377943
O08539	Bin1	bridging integrator 1	30948	O08539_S304	TB_04H-MOCK_00H	-0.615378	0.160905	0.51363	no	-0.615378	0.160905
O08539	Bin1	bridging integrator 1	30948	O08539_S324	TB_04H-MOCK_00H	0.461315	0.17767	0.538421	no	0.461315	0.17767
O08539	Bin1	bridging integrator 1	30948	O08539_S332	TB_04H-MOCK_00H	0.0136732	0.945483	0.982786	no	0.0136732	0.945483
O08547	Sec22b	SEC22 homolog B, vesicle trafficking protein	20333	O08547_S137	TB_04H-MOCK_00H	-1.54359	0.0153924	0.155556	no	-1.54359	0.0153924
O08550	Kmt2b	lysine (K)-specific methyltransferase 2B	75410	O08550_S1037;O08550_S1040	TB_04H-MOCK_00H	-0.505758	0.210864	0.578756	no	-0.505758	0.210864
O08550	Kmt2b	lysine (K)-specific methyltransferase 2B	75410	O08550_S1098;O08550_S1101	TB_04H-MOCK_00H	-0.251133	0.403563	0.753319	no	-0.251133	0.403563
O08553	Dpysl2	dihydropyrimidinase-like 2	12934	O08553_S517	TB_04H-MOCK_00H	0.50326	0.417482	0.763002	no	0.50326	0.417482
O08553	Dpysl2	dihydropyrimidinase-like 2	12934	O08553_S517;O08553_S518	TB_04H-MOCK_00H	#NUM!		0	yes	-7.09968	0.0463916
O08553	Dpysl2	dihydropyrimidinase-like 2	12934	O08553_S522	TB_04H-MOCK_00H	-0.317016	0.803341	0.945833	no	-0.317016	0.803341
O08553	Dpysl2	dihydropyrimidinase-like 2	12934	O08553_S570	TB_04H-MOCK_00H	0.488655	0.270142	0.639997	no	0.488655	0.270142
O08553	Dpysl2	dihydropyrimidinase-like 2	12934	O08553_T509	TB_04H-MOCK_00H	0.566958	0.0355932	0.253154	no	0.566958	0.0355932
O08553	Dpysl2	dihydropyrimidinase-like 2	12934	O08553_T512;O08553_S522	TB_04H-MOCK_00H	-0.184738	0.865904	0.965408	no	-0.184738	0.865904
O08553	Dpysl2	dihydropyrimidinase-like 2	12934	O08553_T512;O08553_T521	TB_04H-MOCK_00H	-0.761701	0.203289	0.568881	no	-0.761701	0.203289
O08553	Dpysl2	dihydropyrimidinase-like 2	12934	O08553_T514	TB_04H-MOCK_00H	-0.853088	0.130771	0.472456	no	-0.853088	0.130771
O08553	Dpysl2	dihydropyrimidinase-like 2	12934	O08553_T514;O08553_S517	TB_04H-MOCK_00H	-0.877608	0.264282	0.635493	no	-0.877608	0.264282
O08553	Dpysl2	dihydropyrimidinase-like 2	12934	O08553_T514;O08553_S517;O08553_T521	TB_04H-MOCK_00H	0.411226	0.611647	0.871213	no	0.411226	0.611647
O08553	Dpysl2	dihydropyrimidinase-like 2	12934	O08553_T514;O08553_S518	TB_04H-MOCK_00H	0.300645	0.877727	0.969942	no	0.300645	0.877727
O08553	Dpysl2	dihydropyrimidinase-like 2	12934	O08553_T521	TB_04H-MOCK_00H	-0.69019	0.280683	0.649098	no	-0.69019	0.280683
O08582	Gtpbp1	GTP binding protein 1	14904	O08582_S12	TB_04H-MOCK_00H	-0.101487	0.663725	0.89125	no	-0.101487	0.663725
O08582	Gtpbp1	GTP binding protein 1	14904	O08582_S12;O08582_S24	TB_04H-MOCK_00H	0.499645	0.465069	0.79487	no	0.499645	0.465069
O08582	Gtpbp1	GTP binding protein 1	14904	O08582_S24	TB_04H-MOCK_00H	0.527641	0.291738	0.660316	no	0.527641	0.291738
O08582	Gtpbp1	GTP binding protein 1	14904	O08582_S6;O08582_S24	TB_04H-MOCK_00H	#NUM!		0	yes	-8.32635	0.0381281
O08582	Gtpbp1	GTP binding protein 1	14904	O08582_S8	TB_04H-MOCK_00H	-0.952935	0.0207988	0.185163	no	-0.952935	0.0207988
O08582	Gtpbp1	GTP binding protein 1	14904	O08582_S8;O08582_S12;O08582_S25	TB_04H-MOCK_00H	0.343266	0.474062	0.800865	no	0.343266	0.474062
O08582	Gtpbp1	GTP binding protein 1	14904	O08582_S8;O08582_S24	TB_04H-MOCK_00H	0.359071	0.695821	0.903268	no	0.359071	0.695821
O08582	Gtpbp1	GTP binding protein 1	14904	O08582_S8;O08582_S25	TB_04H-MOCK_00H	-0.992203	0.45645	0.790225	no	-0.992203	0.45645
O08599	Stxbp1	syntaxin binding protein 1	20910	O08599_S506	TB_04H-MOCK_00H	#NUM!		0	yes	7.67715	0.0249794
O08599	Stxbp1	syntaxin binding protein 1	20910	O08599_S593	TB_04H-MOCK_00H	#NUM!		0	yes	3.7614	0.0136074
O08648	Map3k4	mitogen-activated protein kinase kinase kinase 4	26407	O08648_S1237;O08648_T1243	TB_04H-MOCK_00H	#NUM!		0	yes	5.10532	0.0369725
O08648	Map3k4	mitogen-activated protein kinase kinase kinase 4	26407	O08648_S1259	TB_04H-MOCK_00H	-0.358136	0.650256	0.886823	no	-0.358136	0.650256
O08648	Map3k4	mitogen-activated protein kinase kinase kinase 4	26407	O08648_T202	TB_04H-MOCK_00H	1.96028	0.010347	0.126295	no	1.96028	0.010347
O08715	Akap1	A kinase (PRKA) anchor protein 1	11640	O08715_S101	TB_04H-MOCK_00H	-0.63198	0.365104	0.724373	no	-0.63198	0.365104
O08715	Akap1	A kinase (PRKA) anchor protein 1	11640	O08715_S55	TB_04H-MOCK_00H	-0.450625	0.291836	0.660316	no	-0.450625	0.291836
O08784	Tcof1	treacle ribosome biogenesis factor 1	21453	O08784_S1124	TB_04H-MOCK_00H	0.0549871	0.862632	0.963571	no	0.0549871	0.862632
O08784	Tcof1	treacle ribosome biogenesis factor 1	21453	O08784_S1126	TB_04H-MOCK_00H	-0.0614931	0.819048	0.950551	no	-0.0614931	0.819048
O08784	Tcof1	treacle ribosome biogenesis factor 1	21453	O08784_S1191	TB_04H-MOCK_00H	1.86614	0.00479447	0.0775008	no	1.86614	0.00479447
O08784	Tcof1	treacle ribosome biogenesis factor 1	21453	O08784_S1216	TB_04H-MOCK_00H	-0.063798	0.88372	0.970668	no	-0.063798	0.88372
O08784	Tcof1	treacle ribosome biogenesis factor 1	21453	O08784_S1301	TB_04H-MOCK_00H	-0.682796	0.310682	0.676447	no	-0.682796	0.310682
O08784	Tcof1	treacle ribosome biogenesis factor 1	21453	O08784_S1303	TB_04H-MOCK_00H	-0.624664	0.218134	0.588753	no	-0.624664	0.218134
O08784	Tcof1	treacle ribosome biogenesis factor 1	21453	O08784_S154	TB_04H-MOCK_00H	0.243394	0.740849	0.923639	no	0.243394	0.740849
O08784	Tcof1	treacle ribosome biogenesis factor 1	21453	O08784_S169	TB_04H-MOCK_00H	0.182176	0.429982	0.769546	no	0.182176	0.429982
O08784	Tcof1	treacle ribosome biogenesis factor 1	21453	O08784_S169;O08784_T171	TB_04H-MOCK_00H	-0.0297789	0.970976	0.989896	no	-0.0297789	0.970976
O08784	Tcof1	treacle ribosome biogenesis factor 1	21453	O08784_S593	TB_04H-MOCK_00H	-0.257156	0.334379	0.695929	no	-0.257156	0.334379
O08784	Tcof1	treacle ribosome biogenesis factor 1	21453	O08784_S852	TB_04H-MOCK_00H	0.114463	0.73113	0.919042	no	0.114463	0.73113
O08784	Tcof1	treacle ribosome biogenesis factor 1	21453	O08784_S853	TB_04H-MOCK_00H	0.805762	0.220999	0.590558	no	0.805762	0.220999
O08784	Tcof1	treacle ribosome biogenesis factor 1	21453	O08784_T165	TB_04H-MOCK_00H	1.35977	0.0335186	0.24407	no	1.35977	0.0335186
O08784	Tcof1	treacle ribosome biogenesis factor 1	21453	O08784_T165;O08784_S169	TB_04H-MOCK_00H	-0.066132	0.925743	0.979176	no	-0.066132	0.925743
O08784	Tcof1	treacle ribosome biogenesis factor 1	21453	O08784_T165;O08784_T171	TB_04H-MOCK_00H	#NUM!		0	yes	5.46529	0.0249647
O08784	Tcof1	treacle ribosome biogenesis factor 1	21453	O08784_T171	TB_04H-MOCK_00H	0.356045	0.255679	0.62682	no	0.356045	0.255679
O08843	O08843			O08843_S64	TB_04H-MOCK_00H	-0.350722	0.441911	0.777986	no	-0.350722	0.441911
O08856	Ell	elongation factor RNA polymerase II	13716	O08856_S308	TB_04H-MOCK_00H	-0.345477	0.399788	0.750415	no	-0.345477	0.399788
O08917	Flot1	flotillin 1	14251	O08917_S407	TB_04H-MOCK_00H	1.42747	0.137921	0.48523	no	1.42747	0.137921
O08992	Sdcbp	syndecan binding protein	53378	O08992_S6	TB_04H-MOCK_00H	#NUM!		0	yes	4.25067	0.0181059
O09000	O09000			O09000_S1303	TB_04H-MOCK_00H	0.078706	0.859598	0.963252	no	0.078706	0.859598
O09000	O09000			O09000_S215	TB_04H-MOCK_00H	0.020292	0.951169	0.984053	no	0.020292	0.951169
O09000	O09000			O09000_S562	TB_04H-MOCK_00H	#NUM!		0	yes	-9.02362	0.0182373
O09000	O09000			O09000_S847	TB_04H-MOCK_00H	0.34135	0.131798	0.47404	no	0.34135	0.131798
O09000	O09000			O09000_S847;O09000_S850	TB_04H-MOCK_00H	0.0646649	0.838451	0.957668	no	0.0646649	0.838451
O09000	O09000			O09000_S924	TB_04H-MOCK_00H	-0.18913	0.545309	0.843147	no	-0.18913	0.545309
O09044	Snap23	synaptosomal-associated protein 23	20619	O09044_S110	TB_04H-MOCK_00H	-0.228767	0.733138	0.919241	no	-0.228767	0.733138
O09044	Snap23	synaptosomal-associated protein 23	20619	O09044_S112	TB_04H-MOCK_00H	0.409979	0.277868	0.646525	no	0.409979	0.277868
O09044	Snap23	synaptosomal-associated protein 23	20619	O09044_S20	TB_04H-MOCK_00H	#NUM!		0	yes	3.97041	0.0297577
O09044	Snap23	synaptosomal-associated protein 23	20619	O09044_S20;O09044_S23	TB_04H-MOCK_00H	#NUM!		0	yes	-5.43993	0.0244843
O09044	Snap23	synaptosomal-associated protein 23	20619	O09044_S5	TB_04H-MOCK_00H	#NUM!		0	yes	5.67092	0.027577
O09044	Snap23	synaptosomal-associated protein 23	20619	O09044_T102	TB_04H-MOCK_00H	0.0639047	0.912949	0.977565	no	0.0639047	0.912949
O09047	C3ar1	complement component 3a receptor 1	12267	O09047_S452	TB_04H-MOCK_00H	-0.942512	0.44655	0.782802	no	-0.942512	0.44655
O09047	C3ar1	complement component 3a receptor 1	12267	O09047_S452;O09047_S458	TB_04H-MOCK_00H	1.54004	0.394019	0.7473	no	1.54004	0.394019
O09047	C3ar1	complement component 3a receptor 1	12267	O09047_S452;O09047_T456	TB_04H-MOCK_00H	-1.09688	0.108057	0.43269	no	-1.09688	0.108057
O09047	C3ar1	complement component 3a receptor 1	12267	O09047_S468	TB_04H-MOCK_00H	1.7717	0.0611052	0.327823	no	1.7717	0.0611052
O09047	C3ar1	complement component 3a receptor 1	12267	O09047_T456	TB_04H-MOCK_00H	0.632382	0.0424602	0.274947	no	0.632382	0.0424602
O09106	Hdac1	histone deacetylase 1	433759	O09106_S393	TB_04H-MOCK_00H	1.56428	0.00913761	0.11883	no	1.56428	0.00913761
O09106	Hdac1	histone deacetylase 1	433759	O09106_S409	TB_04H-MOCK_00H	0.883099	0.322818	0.688212	no	0.883099	0.322818
O09126	Sema4d	sema domain, immunoglobulin domain (Ig), transmembrane domain (TM) and short cytoplasmic domain, (semaphorin) 4D	20354	O09126_S856	TB_04H-MOCK_00H	0.692331	0.167395	0.525176	no	0.692331	0.167395
O09130	Nfatc2ip	nuclear factor of activated T cells, cytoplasmic, calcineurin dependent 2 interacting protein	18020	O09130_S79;O09130_S81;O09130_S83	TB_04H-MOCK_00H	-4.69725	0.000107198	0.00541034	no	-4.69725	0.000107198
O35071	Kif1c	kinesin family member 1C	16562	O35071_S1089	TB_04H-MOCK_00H	0.557766	0.0232235	0.196638	no	0.557766	0.0232235
O35071	Kif1c	kinesin family member 1C	16562	O35071_S674;O35071_S676	TB_04H-MOCK_00H	2.54401	0.138261	0.485277	no	2.54401	0.138261
O35071	Kif1c	kinesin family member 1C	16562	O35071_Y671;O35071_S676	TB_04H-MOCK_00H	-0.271916	0.856571	0.963149	no	-0.271916	0.856571
O35126	Atn1	atrophin 1	13498	O35126_S77;O35126_S79	TB_04H-MOCK_00H	1.31515	0.0295387	0.225068	no	1.31515	0.0295387
O35250	Exoc7	exocyst complex component 7	53413	O35250_S241	TB_04H-MOCK_00H	0.445354	0.138524	0.485277	no	0.445354	0.138524
O35250	Exoc7	exocyst complex component 7	53413	O35250_S241;O35250_S250	TB_04H-MOCK_00H	#NUM!		0	yes	4.32832	0.0330268
O35250	Exoc7	exocyst complex component 7	53413	O35250_S242	TB_04H-MOCK_00H	-0.287526	0.55333	0.844775	no	-0.287526	0.55333
O35250	Exoc7	exocyst complex component 7	53413	O35250_S242;O35250_S250	TB_04H-MOCK_00H	#NUM!		0	yes	5.79218	0.0189845
O35250	Exoc7	exocyst complex component 7	53413	O35250_S244	TB_04H-MOCK_00H	0.173667	0.512931	0.825684	no	0.173667	0.512931
O35250	Exoc7	exocyst complex component 7	53413	O35250_S244;O35250_S250	TB_04H-MOCK_00H	#NUM!		0	yes	3.64213	0.0477242
O35250	Exoc7	exocyst complex component 7	53413	O35250_S245	TB_04H-MOCK_00H	0.673244	0.038014	0.261184	no	0.673244	0.038014
O35295	Purb	purine rich element binding protein B	19291	O35295_S6	TB_04H-MOCK_00H	1.07037	0.341557	0.702439	no	1.07037	0.341557
O35295	Purb	purine rich element binding protein B	19291	O35295_S6;O35295_S8	TB_04H-MOCK_00H	-0.96962	0.287097	0.655836	no	-0.96962	0.287097
O35295	Purb	purine rich element binding protein B	19291	O35295_S8	TB_04H-MOCK_00H	-0.5375	0.628929	0.876453	no	-0.5375	0.628929
O35344	Kpna3	karyopherin (importin) alpha 3	16648	O35344_S56	TB_04H-MOCK_00H	#NUM!		0	yes	4.9418	0.0374822
O35344	Kpna3	karyopherin (importin) alpha 3	16648	O35344_S60	TB_04H-MOCK_00H	0.336358	0.202605	0.56847	no	0.336358	0.202605
O35345	Kpna6	karyopherin (importin) alpha 6	16650	O35345_S6	TB_04H-MOCK_00H	1.44934	7.10965e-05	0.00406734	no	1.44934	7.10965e-05
O35379	Abcc1	ATP-binding cassette, sub-family C (CFTR/MRP), member 1	17250	O35379_S912;O35379_S914;O35379_S915	TB_04H-MOCK_00H	3.45718	0.0495955	0.301561	no	3.45718	0.0495955
O35379	Abcc1	ATP-binding cassette, sub-family C (CFTR/MRP), member 1	17250	O35379_S914;O35379_S915;O35379_S916	TB_04H-MOCK_00H	-1.86615	0.158244	0.51134	no	-1.86615	0.158244
O35379	Abcc1	ATP-binding cassette, sub-family C (CFTR/MRP), member 1	17250	O35379_S914;O35379_S916	TB_04H-MOCK_00H	-2.27081	0.0469457	0.291099	no	-2.27081	0.0469457
O35381	Anp32a	acidic (leucine-rich) nuclear phosphoprotein 32 family, member A	11737	O35381_S17	TB_04H-MOCK_00H	1.37033	0.0996714	0.414388	no	1.37033	0.0996714
O35381	Anp32a	acidic (leucine-rich) nuclear phosphoprotein 32 family, member A	11737	O35381_T15	TB_04H-MOCK_00H	-0.0738346	0.906192	0.976134	no	-0.0738346	0.906192
O35492	Clk3	CDC-like kinase 3	102414	O35492_S157	TB_04H-MOCK_00H	0.23072	0.693364	0.902233	no	0.23072	0.693364
O35495	Cdk14	cyclin-dependent kinase 14	18647	O35495_S119;O35495_S120	TB_04H-MOCK_00H	0.51916	0.654781	0.888171	no	0.51916	0.654781
O35495	Cdk14	cyclin-dependent kinase 14	18647	O35495_S134	TB_04H-MOCK_00H	-0.12606	0.880357	0.970015	no	-0.12606	0.880357
O35495	Cdk14	cyclin-dependent kinase 14	18647	O35495_S24	TB_04H-MOCK_00H	0.223937	0.561201	0.847018	no	0.223937	0.561201
O35495	Cdk14	cyclin-dependent kinase 14	18647	O35495_S78	TB_04H-MOCK_00H	0.0530477	0.901882	0.975319	no	0.0530477	0.901882
O35495	Cdk14	cyclin-dependent kinase 14	18647	O35495_S95	TB_04H-MOCK_00H	0.530469	0.649677	0.886585	no	0.530469	0.649677
O35516	Notch2	notch 2	18129	O35516_S2076	TB_04H-MOCK_00H	1.91211	0.0144354	0.150661	no	1.91211	0.0144354
O35551	Rabep1	rabaptin, RAB GTPase binding effector protein 1	54189	O35551_S407	TB_04H-MOCK_00H	-0.415561	0.328488	0.691984	no	-0.415561	0.328488
O35551	Rabep1	rabaptin, RAB GTPase binding effector protein 1	54189	O35551_S407;O35551_S410	TB_04H-MOCK_00H	2.2972	0.0113793	0.133448	no	2.2972	0.0113793
O35551	Rabep1	rabaptin, RAB GTPase binding effector protein 1	54189	O35551_S407;O35551_T413	TB_04H-MOCK_00H	0.119913	0.841151	0.958961	no	0.119913	0.841151
O35551	Rabep1	rabaptin, RAB GTPase binding effector protein 1	54189	O35551_S410	TB_04H-MOCK_00H	0.0392762	0.896257	0.972855	no	0.0392762	0.896257
O35551	Rabep1	rabaptin, RAB GTPase binding effector protein 1	54189	O35551_T408;O35551_S410	TB_04H-MOCK_00H	0.239056	0.333686	0.695807	no	0.239056	0.333686
O35551	Rabep1	rabaptin, RAB GTPase binding effector protein 1	54189	O35551_T408;O35551_S419	TB_04H-MOCK_00H	0.650491	0.29859	0.665787	no	0.650491	0.29859
O35601	Fyb	FYN binding protein	23880	O35601_S114	TB_04H-MOCK_00H	0.562626	0.229971	0.602644	no	0.562626	0.229971
O35601	Fyb	FYN binding protein	23880	O35601_S17	TB_04H-MOCK_00H	-1.7108	0.0564392	0.319547	no	-1.7108	0.0564392
O35601	Fyb	FYN binding protein	23880	O35601_S18	TB_04H-MOCK_00H	-0.190257	0.613778	0.871213	no	-0.190257	0.613778
O35601	Fyb	FYN binding protein	23880	O35601_S201	TB_04H-MOCK_00H	-1.42763	0.235291	0.609095	no	-1.42763	0.235291
O35601	Fyb	FYN binding protein	23880	O35601_S203	TB_04H-MOCK_00H	0.238913	0.854637	0.962928	no	0.238913	0.854637
O35601	Fyb	FYN binding protein	23880	O35601_S222	TB_04H-MOCK_00H	0.784608	0.0102871	0.126295	no	0.784608	0.0102871
O35601	Fyb	FYN binding protein	23880	O35601_S27	TB_04H-MOCK_00H	0.481299	0.53035	0.836105	no	0.481299	0.53035
O35601	Fyb	FYN binding protein	23880	O35601_S28	TB_04H-MOCK_00H	0.583041	0.197054	0.560736	no	0.583041	0.197054
O35601	Fyb	FYN binding protein	23880	O35601_S46	TB_04H-MOCK_00H	1.61661	0.00753069	0.104524	no	1.61661	0.00753069
O35601	Fyb	FYN binding protein	23880	O35601_S546	TB_04H-MOCK_00H	1.08404	0.232558	0.606518	no	1.08404	0.232558
O35601	Fyb	FYN binding protein	23880	O35601_S561	TB_04H-MOCK_00H	0.0701491	0.867359	0.965706	no	0.0701491	0.867359
O35601	Fyb	FYN binding protein	23880	O35601_S568	TB_04H-MOCK_00H	-1.51448	0.0602082	0.327206	no	-1.51448	0.0602082
O35601	Fyb	FYN binding protein	23880	O35601_S665	TB_04H-MOCK_00H	1.87805	0.0897267	0.397784	no	1.87805	0.0897267
O35601	Fyb	FYN binding protein	23880	O35601_Y559	TB_04H-MOCK_00H	0.537618	0.178559	0.539119	no	0.537618	0.178559
O35601	Fyb	FYN binding protein	23880	O35601_Y559;O35601_S561	TB_04H-MOCK_00H	0.718018	0.131626	0.473725	no	0.718018	0.131626
O35609	Scamp3	secretory carrier membrane protein 3	24045	O35609_S78	TB_04H-MOCK_00H	0.548781	0.0430528	0.277775	no	0.548781	0.0430528
O35609	Scamp3	secretory carrier membrane protein 3	24045	O35609_S87	TB_04H-MOCK_00H	-0.915345	0.0965614	0.410705	no	-0.915345	0.0965614
O35613	Daxx	Fas death domain-associated protein	13163	O35613_S515	TB_04H-MOCK_00H	#NUM!		0	yes	4.82942	0.0372768
O35613	Daxx	Fas death domain-associated protein	13163	O35613_S736	TB_04H-MOCK_00H	#NUM!		0	yes	6.81738	0.0168429
O35613	Daxx	Fas death domain-associated protein	13163	O35613_S736;O35613_S738	TB_04H-MOCK_00H	-1.8914	0.013496	0.147492	no	-1.8914	0.013496
O35643	Ap1b1	adaptor protein complex AP-1, beta 1 subunit	11764	O35643_S4	TB_04H-MOCK_00H	#NUM!		0	yes	4.37863	0.0184266
O35671	Itgb1bp1	integrin beta 1 binding protein 1	16413	O35671_S11;O35671_S12	TB_04H-MOCK_00H	-0.35259	0.682686	0.89781	no	-0.35259	0.682686
O35671	Itgb1bp1	integrin beta 1 binding protein 1	16413	O35671_S41	TB_04H-MOCK_00H	-0.0102201	0.95394	0.98493	no	-0.0102201	0.95394
O35691	Pnn	pinin	18949	O35691_S100	TB_04H-MOCK_00H	0.258323	0.602776	0.868331	no	0.258323	0.602776
O35691	Pnn	pinin	18949	O35691_S66	TB_04H-MOCK_00H	-0.654562	0.32725	0.691895	no	-0.654562	0.32725
O35711	Ppfibp2	PTPRF interacting protein, binding protein 2 (liprin beta 2)	19024	O35711_S328	TB_04H-MOCK_00H	#NUM!		0	yes	8.29881	0.0296446
O35711	Ppfibp2	PTPRF interacting protein, binding protein 2 (liprin beta 2)	19024	O35711_S361	TB_04H-MOCK_00H	0.746085	0.304589	0.671815	no	0.746085	0.304589
O35711	Ppfibp2	PTPRF interacting protein, binding protein 2 (liprin beta 2)	19024	O35711_S362	TB_04H-MOCK_00H	0.488245	0.149268	0.501039	no	0.488245	0.149268
O35711	Ppfibp2	PTPRF interacting protein, binding protein 2 (liprin beta 2)	19024	O35711_S386	TB_04H-MOCK_00H	-0.0532939	0.906224	0.976134	no	-0.0532939	0.906224
O35711	Ppfibp2	PTPRF interacting protein, binding protein 2 (liprin beta 2)	19024	O35711_S518	TB_04H-MOCK_00H	0.310242	0.399297	0.750349	no	0.310242	0.399297
O35711	Ppfibp2	PTPRF interacting protein, binding protein 2 (liprin beta 2)	19024	O35711_T516	TB_04H-MOCK_00H	-0.884256	0.120819	0.454858	no	-0.884256	0.120819
O35737	Hnrnph1	heterogeneous nuclear ribonucleoprotein H1	59013	O35737_S104	TB_04H-MOCK_00H	0.410693	0.573688	0.851793	no	0.410693	0.573688
O35841	Api5	apoptosis inhibitor 5	11800	O35841_S461	TB_04H-MOCK_00H	0.309071	0.553853	0.844775	no	0.309071	0.553853
O35841	Api5	apoptosis inhibitor 5	11800	O35841_S461;O35841_S469	TB_04H-MOCK_00H	0.56723	0.41613	0.762221	no	0.56723	0.41613
O35841	Api5	apoptosis inhibitor 5	11800	O35841_S462	TB_04H-MOCK_00H	#NUM!		0	yes	-5.19581	0.0479782
O35841	Api5	apoptosis inhibitor 5	11800	O35841_T460;O35841_S462	TB_04H-MOCK_00H	0.507019	0.588522	0.861105	no	0.507019	0.588522
O35892	Sp100	nuclear antigen Sp100	20684	O35892_S190	TB_04H-MOCK_00H	1.23845	0.0520484	0.309328	no	1.23845	0.0520484
O35892	Sp100	nuclear antigen Sp100	20684	O35892_S314	TB_04H-MOCK_00H	0.201414	0.738928	0.922118	no	0.201414	0.738928
O35892	Sp100	nuclear antigen Sp100	20684	O35892_S314;O35892_S318	TB_04H-MOCK_00H	-0.116737	0.907497	0.976685	no	-0.116737	0.907497
O35892	Sp100	nuclear antigen Sp100	20684	O35892_S314;O35892_S319	TB_04H-MOCK_00H	-1.49746	0.0276957	0.2164	no	-1.49746	0.0276957
O35892	Sp100	nuclear antigen Sp100	20684	O35892_S314;O35892_T316	TB_04H-MOCK_00H	-1.04578	0.398705	0.749685	no	-1.04578	0.398705
O35892	Sp100	nuclear antigen Sp100	20684	O35892_S338	TB_04H-MOCK_00H	0.11281	0.643993	0.882672	no	0.11281	0.643993
O35892	Sp100	nuclear antigen Sp100	20684	O35892_S4	TB_04H-MOCK_00H	-0.456199	0.570148	0.850496	no	-0.456199	0.570148
O35892	Sp100	nuclear antigen Sp100	20684	O35892_S4;O35892_S7	TB_04H-MOCK_00H	-2.42789	0.000536183	0.0176377	no	-2.42789	0.000536183
O35892	Sp100	nuclear antigen Sp100	20684	O35892_S7	TB_04H-MOCK_00H	-1.46697	0.0730209	0.358081	no	-1.46697	0.0730209
O35892	Sp100	nuclear antigen Sp100	20684	O35892_T182	TB_04H-MOCK_00H	0.453649	0.476037	0.801393	no	0.453649	0.476037
O35892	Sp100	nuclear antigen Sp100	20684	O35892_T313	TB_04H-MOCK_00H	1.28641	0.077641	0.370093	no	1.28641	0.077641
O35892	Sp100	nuclear antigen Sp100	20684	O35892_T313;O35892_S314	TB_04H-MOCK_00H	-0.124235	0.815904	0.94934	no	-0.124235	0.815904
O35892	Sp100	nuclear antigen Sp100	20684	O35892_T313;O35892_S318	TB_04H-MOCK_00H	-0.879049	0.391514	0.746168	no	-0.879049	0.391514
O35892	Sp100	nuclear antigen Sp100	20684	O35892_T313;O35892_S319	TB_04H-MOCK_00H	-0.463643	0.380295	0.738572	no	-0.463643	0.380295
O35892	Sp100	nuclear antigen Sp100	20684	O35892_T313;O35892_T316	TB_04H-MOCK_00H	-0.567526	0.477681	0.803383	no	-0.567526	0.477681
O35892	Sp100	nuclear antigen Sp100	20684	O35892_T316;O35892_S318	TB_04H-MOCK_00H	#NUM!		0	yes	4.78325	0.0375797
O35927	Ctnnd2	catenin (cadherin associated protein), delta 2	18163	O35927_S458	TB_04H-MOCK_00H	0.746217	0.0151599	0.153989	no	0.746217	0.0151599
O35927	Ctnnd2	catenin (cadherin associated protein), delta 2	18163	O35927_S471	TB_04H-MOCK_00H	0.00424348	0.988353	0.996097	no	0.00424348	0.988353
O35927	Ctnnd2	catenin (cadherin associated protein), delta 2	18163	O35927_Y1176;O35927_T1178	TB_04H-MOCK_00H	0.45807	0.671679	0.892842	no	0.45807	0.671679
O35954	Pitpnm1	phosphatidylinositol transfer protein, membrane-associated 1	18739	O35954_S664	TB_04H-MOCK_00H	-1.89459	0.09873	0.413108	no	-1.89459	0.09873
O35955	Psmb10	proteasome (prosome, macropain) subunit, beta type 10	19171	O35955_S229	TB_04H-MOCK_00H	0.177805	0.48403	0.807207	no	0.177805	0.48403
O35969	Gamt	guanidinoacetate methyltransferase	14431	O35969_S3	TB_04H-MOCK_00H	0.981843	0.104685	0.424761	no	0.981843	0.104685
O54774	Ap3d1	adaptor-related protein complex 3, delta 1 subunit	11776	O54774_S685	TB_04H-MOCK_00H	#NUM!		0	yes	5.80041	0.0415836
O54774	Ap3d1	adaptor-related protein complex 3, delta 1 subunit	11776	O54774_S754;O54774_S755;O54774_S760	TB_04H-MOCK_00H	0.964524	0.06388	0.334607	no	0.964524	0.06388
O54774	Ap3d1	adaptor-related protein complex 3, delta 1 subunit	11776	O54774_S754;O54774_S755;O54774_T758	TB_04H-MOCK_00H	-1.24104	0.17359	0.532241	no	-1.24104	0.17359
O54774	Ap3d1	adaptor-related protein complex 3, delta 1 subunit	11776	O54774_S754;O54774_S760	TB_04H-MOCK_00H	0.74349	0.362175	0.721896	no	0.74349	0.362175
O54774	Ap3d1	adaptor-related protein complex 3, delta 1 subunit	11776	O54774_S755;O54774_S760	TB_04H-MOCK_00H	-0.488521	0.487065	0.808806	no	-0.488521	0.487065
O54774	Ap3d1	adaptor-related protein complex 3, delta 1 subunit	11776	O54774_S755;O54774_T758	TB_04H-MOCK_00H	1.04896	0.362221	0.721896	no	1.04896	0.362221
O54774	Ap3d1	adaptor-related protein complex 3, delta 1 subunit	11776	O54774_S755;O54774_T758;O54774_S760	TB_04H-MOCK_00H	1.02127	0.151128	0.504301	no	1.02127	0.151128
O54774	Ap3d1	adaptor-related protein complex 3, delta 1 subunit	11776	O54774_S760	TB_04H-MOCK_00H	-0.645685	0.0678248	0.345419	no	-0.645685	0.0678248
O54774	Ap3d1	adaptor-related protein complex 3, delta 1 subunit	11776	O54774_S784	TB_04H-MOCK_00H	1.75831	0.0360911	0.254494	no	1.75831	0.0360911
O54774	Ap3d1	adaptor-related protein complex 3, delta 1 subunit	11776	O54774_S825	TB_04H-MOCK_00H	1.42397	0.00787465	0.10704	no	1.42397	0.00787465
O54774	Ap3d1	adaptor-related protein complex 3, delta 1 subunit	11776	O54774_T382;O54774_T390	TB_04H-MOCK_00H	0.0784854	0.880846	0.970015	no	0.0784854	0.880846
O54774	Ap3d1	adaptor-related protein complex 3, delta 1 subunit	11776	O54774_T758	TB_04H-MOCK_00H	#NUM!		0	yes	4.27446	0.0127913
O54774	Ap3d1	adaptor-related protein complex 3, delta 1 subunit	11776	O54774_T758;O54774_S760	TB_04H-MOCK_00H	0.340768	0.483483	0.806876	no	0.340768	0.483483
O54781	Srpk2	serine/arginine-rich protein specific kinase 2	20817	O54781_S2;O54781_S5;O54781_S10	TB_04H-MOCK_00H	0.194512	0.899853	0.974533	no	0.194512	0.899853
O54781	Srpk2	serine/arginine-rich protein specific kinase 2	20817	O54781_S487	TB_04H-MOCK_00H	0.601137	0.312738	0.677479	no	0.601137	0.312738
O54781	Srpk2	serine/arginine-rich protein specific kinase 2	20817	O54781_S487;O54781_S489	TB_04H-MOCK_00H	-1.61186	0.254194	0.624941	no	-1.61186	0.254194
O54781	Srpk2	serine/arginine-rich protein specific kinase 2	20817	O54781_S487;O54781_S490	TB_04H-MOCK_00H	1.7716	1.24751e-05	0.00122498	no	1.7716	1.24751e-05
O54781	Srpk2	serine/arginine-rich protein specific kinase 2	20817	O54781_S487;O54781_T491	TB_04H-MOCK_00H	0.628213	0.26325	0.63525	no	0.628213	0.26325
O54781	Srpk2	serine/arginine-rich protein specific kinase 2	20817	O54781_S9	TB_04H-MOCK_00H	-0.101908	0.795017	0.942705	no	-0.101908	0.795017
O54785	Limk2	LIM motif-containing protein kinase 2	16886	O54785_S289	TB_04H-MOCK_00H	-0.617139	0.0478527	0.294758	no	-0.617139	0.0478527
O54785	Limk2	LIM motif-containing protein kinase 2	16886	O54785_S289;O54785_S291	TB_04H-MOCK_00H	0.182113	0.66302	0.89125	no	0.182113	0.66302
O54785	Limk2	LIM motif-containing protein kinase 2	16886	O54785_S289;O54785_S291;O54785_S297	TB_04H-MOCK_00H	#NUM!		0	yes	6.40228	0.014484
O54786	Dffa	DNA fragmentation factor, alpha subunit	13347	O54786_S28	TB_04H-MOCK_00H	#NUM!		0	yes	4.57022	0.0271701
O54824	Il16	interleukin 16	16170	O54824_S838	TB_04H-MOCK_00H	0.86762	0.549967	0.843798	no	0.86762	0.549967
O54824	Il16	interleukin 16	16170	O54824_S839	TB_04H-MOCK_00H	0.53646	0.140309	0.488167	no	0.53646	0.140309
O54824	Il16	interleukin 16	16170	O54824_S930	TB_04H-MOCK_00H	1.76138	3.004e-11	6.58777e-08	no	1.76138	3.004e-11
O54824	Il16	interleukin 16	16170	O54824_S959	TB_04H-MOCK_00H	0.380719	0.347542	0.707778	no	0.380719	0.347542
O54824	Il16	interleukin 16	16170	O54824_S967	TB_04H-MOCK_00H	0.0367834	0.903931	0.975319	no	0.0367834	0.903931
O54825	Bysl	bystin-like	53414	O54825_S97	TB_04H-MOCK_00H	-0.176333	0.557144	0.845167	no	-0.176333	0.557144
O54834	Arhgap6	Rho GTPase activating protein 6	11856	O54834_S338;O54834_T339	TB_04H-MOCK_00H	-1.42541	0.0150363	0.153371	no	-1.42541	0.0150363
O54834	Arhgap6	Rho GTPase activating protein 6	11856	O54834_S365	TB_04H-MOCK_00H	0.176023	0.626578	0.876453	no	0.176023	0.626578
O54834	Arhgap6	Rho GTPase activating protein 6	11856	O54834_S712	TB_04H-MOCK_00H	0.504746	0.381459	0.739428	no	0.504746	0.381459
O54834	Arhgap6	Rho GTPase activating protein 6	11856	O54834_S790	TB_04H-MOCK_00H	#NUM!		0	yes	8.36694	0.0132006
O54834	Arhgap6	Rho GTPase activating protein 6	11856	O54834_S824	TB_04H-MOCK_00H	-0.327693	0.437333	0.773878	no	-0.327693	0.437333
O54916	Reps1	RalBP1 associated Eps domain containing protein	19707	O54916_S272	TB_04H-MOCK_00H	0.997558	0.24276	0.614494	no	0.997558	0.24276
O54916	Reps1	RalBP1 associated Eps domain containing protein	19707	O54916_S272;O54916_S273	TB_04H-MOCK_00H	0.331663	0.886134	0.971646	no	0.331663	0.886134
O54916	Reps1	RalBP1 associated Eps domain containing protein	19707	O54916_S272;O54916_S274	TB_04H-MOCK_00H	#NUM!		0	yes	-5.77714	0.0262256
O54916	Reps1	RalBP1 associated Eps domain containing protein	19707	O54916_S273	TB_04H-MOCK_00H	-0.404508	0.561997	0.847524	no	-0.404508	0.561997
O54916	Reps1	RalBP1 associated Eps domain containing protein	19707	O54916_S536;O54916_S555	TB_04H-MOCK_00H	-0.734165	0.40115	0.751763	no	-0.734165	0.40115
O54916	Reps1	RalBP1 associated Eps domain containing protein	19707	O54916_S560	TB_04H-MOCK_00H	-0.703949	0.223566	0.593559	no	-0.703949	0.223566
O54916	Reps1	RalBP1 associated Eps domain containing protein	19707	O54916_S561	TB_04H-MOCK_00H	1.04356	0.108353	0.433248	no	1.04356	0.108353
O54916	Reps1	RalBP1 associated Eps domain containing protein	19707	O54916_S708	TB_04H-MOCK_00H	0.965681	0.352384	0.711363	no	0.965681	0.352384
O54918	Bcl2l11	BCL2-like 11 (apoptosis facilitator)	12125	O54918_S83	TB_04H-MOCK_00H	-0.875623	0.0903001	0.39925	no	-0.875623	0.0903001
O54918	Bcl2l11	BCL2-like 11 (apoptosis facilitator)	12125	O54918_S90	TB_04H-MOCK_00H	0.580572	0.269955	0.639997	no	0.580572	0.269955
O54928	Socs5	suppressor of cytokine signaling 5	56468	O54928_S44	TB_04H-MOCK_00H	0.309519	0.571965	0.85146	no	0.309519	0.571965
O54928	Socs5	suppressor of cytokine signaling 5	56468	O54928_S44;O54928_S46	TB_04H-MOCK_00H	1.21147	0.0557914	0.317519	no	1.21147	0.0557914
O54940	Bnip2	BCL2/adenovirus E1B interacting protein 2	12175	O54940_S114	TB_04H-MOCK_00H	-0.161694	0.758028	0.92979	no	-0.161694	0.758028
O54965	Rnf13	ring finger protein 13	24017	O54965_S288;O54965_S294;O54965_S298	TB_04H-MOCK_00H	-0.946888	0.0792517	0.374029	no	-0.946888	0.0792517
O54988	Slk	STE20-like kinase	20874	O54988_S643;O54988_S645	TB_04H-MOCK_00H	#NUM!		0	yes	-5.92737	0.0277118
O54988	Slk	STE20-like kinase	20874	O54988_S666	TB_04H-MOCK_00H	#NUM!		0	yes	3.8547	0.0183584
O54988	Slk	STE20-like kinase	20874	O54988_S775	TB_04H-MOCK_00H	-1.18167	0.0267704	0.211941	no	-1.18167	0.0267704
O54988	Slk	STE20-like kinase	20874	O54988_S777	TB_04H-MOCK_00H	-1.68657	5.32424e-05	0.00346814	no	-1.68657	5.32424e-05
O55022	Pgrmc1	progesterone receptor membrane component 1	53328	O55022_S181	TB_04H-MOCK_00H	0.656724	0.288925	0.657728	no	0.656724	0.288925
O55022	Pgrmc1	progesterone receptor membrane component 1	53328	O55022_T178	TB_04H-MOCK_00H	0.241051	0.766052	0.933307	no	0.241051	0.766052
O55022	Pgrmc1	progesterone receptor membrane component 1	53328	O55022_Y180	TB_04H-MOCK_00H	#NUM!		0	yes	5.98791	0.0387862
O55028	Bckdk	branched chain ketoacid dehydrogenase kinase	12041	O55028_S31	TB_04H-MOCK_00H	-0.757145	0.354601	0.713431	no	-0.757145	0.354601
O55033	Nck2	non-catalytic region of tyrosine kinase adaptor protein 2	17974	O55033_S90	TB_04H-MOCK_00H	0.0927981	0.909436	0.976846	no	0.0927981	0.909436
O55033	Nck2	non-catalytic region of tyrosine kinase adaptor protein 2	17974	O55033_S90;O55033_T92	TB_04H-MOCK_00H	0.0852284	0.85218	0.962653	no	0.0852284	0.85218
O55098	Stk10	serine/threonine kinase 10	20868	O55098_S13	TB_04H-MOCK_00H	0.497796	0.268579	0.639802	no	0.497796	0.268579
O55098	Stk10	serine/threonine kinase 10	20868	O55098_S412	TB_04H-MOCK_00H	0.482492	0.447637	0.783563	no	0.482492	0.447637
O55098	Stk10	serine/threonine kinase 10	20868	O55098_S416	TB_04H-MOCK_00H	0.338615	0.221689	0.591155	no	0.338615	0.221689
O55098	Stk10	serine/threonine kinase 10	20868	O55098_S437	TB_04H-MOCK_00H	0.00672955	0.98635	0.995274	no	0.00672955	0.98635
O55098	Stk10	serine/threonine kinase 10	20868	O55098_S449;O55098_S453	TB_04H-MOCK_00H	-0.0661447	0.890284	0.9723	no	-0.0661447	0.890284
O55098	Stk10	serine/threonine kinase 10	20868	O55098_S449;O55098_S454	TB_04H-MOCK_00H	0.108577	0.795617	0.942705	no	0.108577	0.795617
O55098	Stk10	serine/threonine kinase 10	20868	O55098_S454	TB_04H-MOCK_00H	0.22707	0.520023	0.830132	no	0.22707	0.520023
O55098	Stk10	serine/threonine kinase 10	20868	O55098_T950	TB_04H-MOCK_00H	0.643039	0.187629	0.548193	no	0.643039	0.187629
O55106	Strn	striatin, calmodulin binding protein	268980	O55106_S239	TB_04H-MOCK_00H	-0.357485	0.692044	0.901589	no	-0.357485	0.692044
O55106	Strn	striatin, calmodulin binding protein	268980	O55106_S245	TB_04H-MOCK_00H	0.836794	0.144957	0.495267	no	0.836794	0.144957
O55131	Sept7	septin 7	235072	O55131_S422	TB_04H-MOCK_00H	-0.390721	0.462684	0.793535	no	-0.390721	0.462684
O55131	Sept7	septin 7	235072	O55131_S423	TB_04H-MOCK_00H	-0.534312	0.460452	0.791978	no	-0.534312	0.460452
O55131	Sept7	septin 7	235072	O55131_T425	TB_04H-MOCK_00H	-1.75239	0.0139562	0.14885	no	-1.75239	0.0139562
O55143	Atp2a2	ATPase, Ca++ transporting, cardiac muscle, slow twitch 2	11938	O55143_S663	TB_04H-MOCK_00H	0.334608	0.542881	0.842123	no	0.334608	0.542881
O55201	Supt5	suppressor of Ty 5	20924	O55201_S664	TB_04H-MOCK_00H	0.274365	0.181117	0.541372	no	0.274365	0.181117
O55222	Ilk	integrin linked kinase	16202	O55222_T181	TB_04H-MOCK_00H	-0.426924	0.615901	0.871213	no	-0.426924	0.615901
O70131	Ninj1	ninjurin 1	18081	O70131_S18;O70131_S21	TB_04H-MOCK_00H	2.37941	0.0087103	0.11507	no	2.37941	0.0087103
O70131	Ninj1	ninjurin 1	18081	O70131_S3	TB_04H-MOCK_00H	0.332804	0.375107	0.733256	no	0.332804	0.375107
O70131	Ninj1	ninjurin 1	18081	O70131_T5;O70131_Y8	TB_04H-MOCK_00H	#NUM!		0	yes	4.58365	0.0472696
O70131	Ninj1	ninjurin 1	18081	O70131_Y8	TB_04H-MOCK_00H	0.202508	0.731862	0.919054	no	0.202508	0.731862
O70131	Ninj1	ninjurin 1	18081	O70131_Y8;O70131_S18	TB_04H-MOCK_00H	#NUM!		0	yes	-5.47926	0.0259174
O70145	Ncf2	neutrophil cytosolic factor 2	17970	O70145_S224	TB_04H-MOCK_00H	-2.19868	0.0607182	0.327206	no	-2.19868	0.0607182
O70145	Ncf2	neutrophil cytosolic factor 2	17970	O70145_S312	TB_04H-MOCK_00H	#NUM!		0	yes	5.09742	0.0371291
O70145	Ncf2	neutrophil cytosolic factor 2	17970	O70145_S312;O70145_S324	TB_04H-MOCK_00H	1.7591	0.0525191	0.310165	no	1.7591	0.0525191
O70145	Ncf2	neutrophil cytosolic factor 2	17970	O70145_S315;O70145_S323	TB_04H-MOCK_00H	#NUM!		0	yes	5.55109	0.0230072
O70145	Ncf2	neutrophil cytosolic factor 2	17970	O70145_S315;O70145_S324	TB_04H-MOCK_00H	#NUM!		0	yes	4.58345	0.0406666
O70145	Ncf2	neutrophil cytosolic factor 2	17970	O70145_S323	TB_04H-MOCK_00H	-0.392726	0.740214	0.923548	no	-0.392726	0.740214
O70145	Ncf2	neutrophil cytosolic factor 2	17970	O70145_S324	TB_04H-MOCK_00H	0.744831	0.0578477	0.32198	no	0.744831	0.0578477
O70145	Ncf2	neutrophil cytosolic factor 2	17970	O70145_S332	TB_04H-MOCK_00H	0.785614	0.227514	0.598486	no	0.785614	0.227514
O70145	Ncf2	neutrophil cytosolic factor 2	17970	O70145_T233	TB_04H-MOCK_00H	-0.827004	0.555177	0.844901	no	-0.827004	0.555177
O70145	Ncf2	neutrophil cytosolic factor 2	17970	O70145_T311	TB_04H-MOCK_00H	#NUM!		0	yes	7.80153	0.0366704
O70146	Tesk1	testis specific protein kinase 1	21754	O70146_S439;O70146_S442	TB_04H-MOCK_00H	-0.0626787	0.857916	0.963252	no	-0.0626787	0.857916
O70161	Pip5k1c	phosphatidylinositol-4-phosphate 5-kinase, type 1 gamma	18717	O70161_S554	TB_04H-MOCK_00H	-0.43693	0.43363	0.771896	no	-0.43693	0.43363
O70172	Pip4k2a	phosphatidylinositol-5-phosphate 4-kinase, type II, alpha	18718	O70172_S9	TB_04H-MOCK_00H	0.30847	0.440983	0.776767	no	0.30847	0.440983
O70279	Ess2	ess-2 splicing factor	27886	O70279_S394;O70279_S398	TB_04H-MOCK_00H	-0.366563	0.263854	0.635395	no	-0.366563	0.263854
O70279	Ess2	ess-2 splicing factor	27886	O70279_T3	TB_04H-MOCK_00H	-0.151948	0.6568	0.88893	no	-0.151948	0.6568
O70305	Atxn2	ataxin 2	20239	O70305_S653	TB_04H-MOCK_00H	0.524665	0.121807	0.457228	no	0.524665	0.121807
O70305	Atxn2	ataxin 2	20239	O70305_T710	TB_04H-MOCK_00H	0.0698165	0.813024	0.948943	no	0.0698165	0.813024
O70310	Nmt1	N-myristoyltransferase 1	18107	O70310_S47	TB_04H-MOCK_00H	0.339935	0.571532	0.851089	no	0.339935	0.571532
O70318	Epb41l2	erythrocyte membrane protein band 4.1 like 2	13822	O70318_S201	TB_04H-MOCK_00H	0.432885	0.314997	0.680356	no	0.432885	0.314997
O70318	Epb41l2	erythrocyte membrane protein band 4.1 like 2	13822	O70318_S38	TB_04H-MOCK_00H	0.1423	0.703859	0.904466	no	0.1423	0.703859
O70318	Epb41l2	erythrocyte membrane protein band 4.1 like 2	13822	O70318_S492	TB_04H-MOCK_00H	0.452353	0.457511	0.790225	no	0.452353	0.457511
O70318	Epb41l2	erythrocyte membrane protein band 4.1 like 2	13822	O70318_S580	TB_04H-MOCK_00H	#NUM!		0	yes	7.31431	0.0312278
O70318	Epb41l2	erythrocyte membrane protein band 4.1 like 2	13822	O70318_S582	TB_04H-MOCK_00H	2.31605	5.49271e-07	0.000106284	no	2.31605	5.49271e-07
O70318	Epb41l2	erythrocyte membrane protein band 4.1 like 2	13822	O70318_S698	TB_04H-MOCK_00H	2.07388	0.00275905	0.0553645	no	2.07388	0.00275905
O70318	Epb41l2	erythrocyte membrane protein band 4.1 like 2	13822	O70318_S86	TB_04H-MOCK_00H	1.87549	0.0158024	0.157926	no	1.87549	0.0158024
O70318	Epb41l2	erythrocyte membrane protein band 4.1 like 2	13822	O70318_T35	TB_04H-MOCK_00H	1.60899	0.0935567	0.405975	no	1.60899	0.0935567
O70404	Vamp8	vesicle-associated membrane protein 8	22320	O70404_S5	TB_04H-MOCK_00H	-0.387148	0.45345	0.788176	no	-0.387148	0.45345
O70404	Vamp8	vesicle-associated membrane protein 8	22320	O70404_T54	TB_04H-MOCK_00H	#NUM!		0	yes	-5.16746	0.0153815
O70405	Ulk1	unc-51 like kinase 1	22241	O70405_S450	TB_04H-MOCK_00H	0.92276	0.0358971	0.254184	no	0.92276	0.0358971
O70405	Ulk1	unc-51 like kinase 1	22241	O70405_S622	TB_04H-MOCK_00H	-0.353121	0.256	0.627272	no	-0.353121	0.256
O70405	Ulk1	unc-51 like kinase 1	22241	O70405_T624	TB_04H-MOCK_00H	-0.168564	0.651739	0.887902	no	-0.168564	0.651739
O70435	Psma3	proteasome (prosome, macropain) subunit, alpha type 3	19167	O70435_S243	TB_04H-MOCK_00H	-0.346821	0.538344	0.838755	no	-0.346821	0.538344
O70435	Psma3	proteasome (prosome, macropain) subunit, alpha type 3	19167	O70435_S250	TB_04H-MOCK_00H	0.191811	0.791883	0.942304	no	0.191811	0.791883
O70439	O70439			O70439_S125;O70439_S136	TB_04H-MOCK_00H	#NUM!		0	yes	-8.33921	0.010785
O70439	O70439			O70439_S126	TB_04H-MOCK_00H	-0.308688	0.437696	0.773878	no	-0.308688	0.437696
O70439	O70439			O70439_S126;O70439_S129	TB_04H-MOCK_00H	0.680411	0.364047	0.723366	no	0.680411	0.364047
O70439	O70439			O70439_S126;O70439_S136	TB_04H-MOCK_00H	#NUM!		0	yes	-7.12872	0.024063
O70439	O70439			O70439_S129	TB_04H-MOCK_00H	-0.955475	0.00995112	0.124465	no	-0.955475	0.00995112
O70439	O70439			O70439_S147	TB_04H-MOCK_00H	-0.471522	0.453444	0.788176	no	-0.471522	0.453444
O70439	O70439			O70439_S2	TB_04H-MOCK_00H	0.831611	0.169557	0.527776	no	0.831611	0.169557
O70439	O70439			O70439_S45	TB_04H-MOCK_00H	-0.0776344	0.728247	0.917542	no	-0.0776344	0.728247
O70439	O70439			O70439_S75	TB_04H-MOCK_00H	#NUM!		0	yes	5.52879	0.013388
O70439	O70439			O70439_Y3;O70439_T4	TB_04H-MOCK_00H	#NUM!		0	yes	-6.65226	0.0123475
O70469	Dok2	docking protein 2	13449	O70469_S124	TB_04H-MOCK_00H	-1.73423	0.00224516	0.0492364	no	-1.73423	0.00224516
O70469	Dok2	docking protein 2	13449	O70469_S133	TB_04H-MOCK_00H	#NUM!		0	yes	4.76576	0.0294174
O70480	Vamp4	vesicle-associated membrane protein 4	53330	O70480_S30	TB_04H-MOCK_00H	-0.161762	0.779333	0.938298	no	-0.161762	0.779333
O70492	O70492			O70492_T13	TB_04H-MOCK_00H	0.11798	0.84465	0.959564	no	0.11798	0.84465
O70493	Snx12	sorting nexin 12	55988	O70493_S2	TB_04H-MOCK_00H	0.0652387	0.854526	0.962928	no	0.0652387	0.854526
O70551	Srpk1	serine/arginine-rich protein specific kinase 1	20815	O70551_T438;O70551_S450	TB_04H-MOCK_00H	2.6852	0.119716	0.452652	no	2.6852	0.119716
O70551	Srpk1	serine/arginine-rich protein specific kinase 1	20815	O70551_T448;O70551_S450	TB_04H-MOCK_00H	-0.0682834	0.879464	0.969991	no	-0.0682834	0.879464
O70585	Dtnb	dystrobrevin, beta	13528	O70585_T522;O70585_T527	TB_04H-MOCK_00H	0.726302	0.434869	0.772317	no	0.726302	0.434869
O88286	Wiz	widely-interspaced zinc finger motifs	22404	O88286_S1014	TB_04H-MOCK_00H	#NUM!		0	yes	-5.13993	0.0209366
O88286	Wiz	widely-interspaced zinc finger motifs	22404	O88286_S1043	TB_04H-MOCK_00H	1.46526	0.000218249	0.00920421	no	1.46526	0.000218249
O88286	Wiz	widely-interspaced zinc finger motifs	22404	O88286_S1045;O88286_S1050	TB_04H-MOCK_00H	0.474078	0.232792	0.606518	no	0.474078	0.232792
O88286	Wiz	widely-interspaced zinc finger motifs	22404	O88286_S1179	TB_04H-MOCK_00H	-0.431588	0.110275	0.437049	no	-0.431588	0.110275
O88351	Ikbkb	inhibitor of kappaB kinase beta	16150	O88351_S670	TB_04H-MOCK_00H	-0.199714	0.651462	0.887732	no	-0.199714	0.651462
O88351	Ikbkb	inhibitor of kappaB kinase beta	16150	O88351_S672	TB_04H-MOCK_00H	1.47601	0.0854345	0.388978	no	1.47601	0.0854345
O88351	Ikbkb	inhibitor of kappaB kinase beta	16150	O88351_S675	TB_04H-MOCK_00H	0.360216	0.364712	0.724249	no	0.360216	0.364712
O88447	O88447			O88447_S523	TB_04H-MOCK_00H	0.6063	0.404179	0.753334	no	0.6063	0.404179
O88448	O88448			O88448_S539	TB_04H-MOCK_00H	-0.0855928	0.830452	0.955666	no	-0.0855928	0.830452
O88448	O88448			O88448_S575	TB_04H-MOCK_00H	-0.016349	0.925418	0.979176	no	-0.016349	0.925418
O88466	O88466			O88466_S1040;O88466_S1041	TB_04H-MOCK_00H	#NUM!		0	yes	-5.61879	0.0491325
O88466	O88466			O88466_S1381	TB_04H-MOCK_00H	-0.160614	0.678581	0.897163	no	-0.160614	0.678581
O88466	O88466			O88466_S878	TB_04H-MOCK_00H	#NUM!		0	yes	3.64329	0.0133927
O88487	Dync1i2	dynein cytoplasmic 1 intermediate chain 2	13427	O88487_S81	TB_04H-MOCK_00H	1.93243	9.10711e-05	0.00479326	no	1.93243	9.10711e-05
O88487	Dync1i2	dynein cytoplasmic 1 intermediate chain 2	13427	O88487_S84	TB_04H-MOCK_00H	#NUM!		0	yes	5.63646	0.0375993
O88487	Dync1i2	dynein cytoplasmic 1 intermediate chain 2	13427	O88487_S88	TB_04H-MOCK_00H	-0.207317	0.4987	0.815548	no	-0.207317	0.4987
O88487	Dync1i2	dynein cytoplasmic 1 intermediate chain 2	13427	O88487_S95	TB_04H-MOCK_00H	#NUM!		0	yes	4.15906	0.0490531
O88487	Dync1i2	dynein cytoplasmic 1 intermediate chain 2	13427	O88487_S98	TB_04H-MOCK_00H	0.0639162	0.89567	0.972855	no	0.0639162	0.89567
O88502	Pde8a	phosphodiesterase 8A	18584	O88502_S16	TB_04H-MOCK_00H	0.12507	0.858301	0.963252	no	0.12507	0.858301
O88502	Pde8a	phosphodiesterase 8A	18584	O88502_S18	TB_04H-MOCK_00H	1.13909	0.489508	0.809979	no	1.13909	0.489508
O88502	Pde8a	phosphodiesterase 8A	18584	O88502_S382	TB_04H-MOCK_00H	#NUM!		0	yes	3.87179	0.0341267
O88502	Pde8a	phosphodiesterase 8A	18584	O88502_S452	TB_04H-MOCK_00H	-0.76788	0.098431	0.412733	no	-0.76788	0.098431
O88508	Dnmt3a	DNA methyltransferase 3A	13435	O88508_S102	TB_04H-MOCK_00H	-0.856453	0.0743806	0.361468	no	-0.856453	0.0743806
O88532	Zfr	zinc finger RNA binding protein	22763	O88532_S1054	TB_04H-MOCK_00H	-0.159536	0.807087	0.946662	no	-0.159536	0.807087
O88569	Hnrnpa2b1	heterogeneous nuclear ribonucleoprotein A2/B1	53379	O88569_S259	TB_04H-MOCK_00H	0.0547031	0.972921	0.990227	no	0.0547031	0.972921
O88569	Hnrnpa2b1	heterogeneous nuclear ribonucleoprotein A2/B1	53379	O88569_S344	TB_04H-MOCK_00H	-0.65561	0.271172	0.641053	no	-0.65561	0.271172
O88569	Hnrnpa2b1	heterogeneous nuclear ribonucleoprotein A2/B1	53379	O88569_Y247	TB_04H-MOCK_00H	#NUM!		0	yes	-6.64998	0.0471443
O88573	O88573			O88573_S183;O88573_S187;O88573_S197	TB_04H-MOCK_00H	-0.665533	0.441769	0.777944	no	-0.665533	0.441769
O88573	O88573			O88573_S183;O88573_S191;O88573_S197	TB_04H-MOCK_00H	-1.6153	0.17375	0.532358	no	-1.6153	0.17375
O88573	O88573			O88573_S183;O88573_S197	TB_04H-MOCK_00H	#NUM!		0	yes	4.21563	0.018058
O88587	Comt	catechol-O-methyltransferase	12846	O88587_S260	TB_04H-MOCK_00H	-0.346883	0.453865	0.788274	no	-0.346883	0.453865
O88587	Comt	catechol-O-methyltransferase	12846	O88587_S261	TB_04H-MOCK_00H	0.287574	0.256945	0.628316	no	0.287574	0.256945
O88627	Slc28a2	solute carrier family 28 (sodium-coupled nucleoside transporter), member 2	269346	O88627_S11	TB_04H-MOCK_00H	-0.0019947	0.997581	0.999393	no	-0.0019947	0.997581
O88627	Slc28a2	solute carrier family 28 (sodium-coupled nucleoside transporter), member 2	269346	O88627_S9	TB_04H-MOCK_00H	-1.17398	0.0399028	0.268701	no	-1.17398	0.0399028
O88627	Slc28a2	solute carrier family 28 (sodium-coupled nucleoside transporter), member 2	269346	O88627_T14	TB_04H-MOCK_00H	0.323062	0.64466	0.88298	no	0.323062	0.64466
O88643	O88643			O88643_T212;O88643_T214	TB_04H-MOCK_00H	1.7371	0.00128417	0.0339298	no	1.7371	0.00128417
O88667	O88667			O88667_S301	TB_04H-MOCK_00H	-0.694745	0.347877	0.707778	no	-0.694745	0.347877
O88667	O88667			O88667_S39	TB_04H-MOCK_00H	#NUM!		0	yes	4.74066	0.0151247
O88685	Psmc3	proteasome (prosome, macropain) 26S subunit, ATPase 3	19182	O88685_S12	TB_04H-MOCK_00H	1.09936	2.29881e-05	0.00182215	no	1.09936	2.29881e-05
O88685	Psmc3	proteasome (prosome, macropain) 26S subunit, ATPase 3	19182	O88685_T15	TB_04H-MOCK_00H	0.61089	0.209808	0.576786	no	0.61089	0.209808
O88685	Psmc3	proteasome (prosome, macropain) 26S subunit, ATPase 3	19182	O88685_T9	TB_04H-MOCK_00H	0.386294	0.387145	0.742639	no	0.386294	0.387145
O88685	Psmc3	proteasome (prosome, macropain) 26S subunit, ATPase 3	19182	O88685_Y229;O88685_T234;O88685_T237	TB_04H-MOCK_00H	#NUM!		0	yes	4.80762	0.0170162
O88737	Bsn	bassoon	12217	O88737_S2860	TB_04H-MOCK_00H	-0.140707	0.747328	0.92617	no	-0.140707	0.747328
O88737	Bsn	bassoon	12217	O88737_S2860;O88737_S2866	TB_04H-MOCK_00H	1.38722	0.000322838	0.0126426	no	1.38722	0.000322838
O88737	Bsn	bassoon	12217	O88737_T2595	TB_04H-MOCK_00H	-0.585057	0.0650803	0.337402	no	-0.585057	0.0650803
O88738	Birc6	baculoviral IAP repeat-containing 6	12211	O88738_S4047	TB_04H-MOCK_00H	-0.300283	0.296996	0.665056	no	-0.300283	0.296996
O88738	Birc6	baculoviral IAP repeat-containing 6	12211	O88738_T3880;O88738_T3888	TB_04H-MOCK_00H	#NUM!		0	yes	-6.08994	0.0207621
O88746	Tom1	target of myb1 trafficking protein	21968	O88746_S172;O88746_S176	TB_04H-MOCK_00H	1.0613	5.32357e-05	0.00346814	no	1.0613	5.32357e-05
O88746	Tom1	target of myb1 trafficking protein	21968	O88746_S176;O88746_S180	TB_04H-MOCK_00H	0.8762	0.490657	0.810769	no	0.8762	0.490657
O88746	Tom1	target of myb1 trafficking protein	21968	O88746_S182	TB_04H-MOCK_00H	1.45608	0.00238485	0.0511072	no	1.45608	0.00238485
O88746	Tom1	target of myb1 trafficking protein	21968	O88746_S405	TB_04H-MOCK_00H	1.02747	0.755853	0.92979	no	1.02747	0.755853
O88746	Tom1	target of myb1 trafficking protein	21968	O88746_S462	TB_04H-MOCK_00H	0.391368	0.280539	0.649098	no	0.391368	0.280539
O88746	Tom1	target of myb1 trafficking protein	21968	O88746_S462;O88746_S464	TB_04H-MOCK_00H	2.29221	0.00385094	0.068474	no	2.29221	0.00385094
O88746	Tom1	target of myb1 trafficking protein	21968	O88746_S462;O88746_S472	TB_04H-MOCK_00H	#NUM!		0	yes	5.84394	0.032396
O88746	Tom1	target of myb1 trafficking protein	21968	O88746_S472	TB_04H-MOCK_00H	0.48726	0.137667	0.484597	no	0.48726	0.137667
O88842	O88842			O88842_T545	TB_04H-MOCK_00H	-0.100399	0.481056	0.806221	no	-0.100399	0.481056
O88845	Akap10	A kinase (PRKA) anchor protein 10	56697	O88845_S257	TB_04H-MOCK_00H	0.0304537	0.93821	0.98241	no	0.0304537	0.93821
O88845	Akap10	A kinase (PRKA) anchor protein 10	56697	O88845_S278	TB_04H-MOCK_00H	#NUM!		0	yes	4.68359	0.0127152
O88845	Akap10	A kinase (PRKA) anchor protein 10	56697	O88845_S280	TB_04H-MOCK_00H	0.142533	0.660396	0.890917	no	0.142533	0.660396
O88845	Akap10	A kinase (PRKA) anchor protein 10	56697	O88845_S280;O88845_S281	TB_04H-MOCK_00H	1.53287	9.65107e-05	0.00497328	no	1.53287	9.65107e-05
O88845	Akap10	A kinase (PRKA) anchor protein 10	56697	O88845_S281	TB_04H-MOCK_00H	#NUM!		0	yes	4.77043	0.0208223
O88852	Tspyl1	testis-specific protein, Y-encoded-like 1	22110	O88852_S3	TB_04H-MOCK_00H	-0.222899	0.190401	0.552803	no	-0.222899	0.190401
O88852	Tspyl1	testis-specific protein, Y-encoded-like 1	22110	O88852_S3;O88852_S15	TB_04H-MOCK_00H	0.255474	0.668966	0.891332	no	0.255474	0.668966
O88874	O88874			O88874_S325;O88874_S329	TB_04H-MOCK_00H	0.320491	0.634102	0.877989	no	0.320491	0.634102
O88878	Zfand5	zinc finger, AN1-type domain 5	22682	O88878_S44	TB_04H-MOCK_00H	0.321514	0.81187	0.948943	no	0.321514	0.81187
O88878	Zfand5	zinc finger, AN1-type domain 5	22682	O88878_S48	TB_04H-MOCK_00H	#NUM!		0	yes	3.41281	0.0433147
O88907	Pias1	protein inhibitor of activated STAT 1	56469	O88907_S506	TB_04H-MOCK_00H	0.298491	0.234627	0.60844	no	0.298491	0.234627
O88935	Syn1	synapsin I	20964	O88935_S427	TB_04H-MOCK_00H	0.101376	0.882619	0.970379	no	0.101376	0.882619
O88939	Zbtb7a	zinc finger and BTB domain containing 7a	16969	O88939_S331	TB_04H-MOCK_00H	0.899814	0.291968	0.660316	no	0.899814	0.291968
O88939	Zbtb7a	zinc finger and BTB domain containing 7a	16969	O88939_S331;O88939_Y345	TB_04H-MOCK_00H	0.284951	0.738411	0.921823	no	0.284951	0.738411
O88939	Zbtb7a	zinc finger and BTB domain containing 7a	16969	O88939_S335	TB_04H-MOCK_00H	#NUM!		0	yes	-7.68494	0.0341127
O88939	Zbtb7a	zinc finger and BTB domain containing 7a	16969	O88939_Y346;O88939_Y349	TB_04H-MOCK_00H	0.736589	0.00157317	0.0389092	no	0.736589	0.00157317
O88942	O88942			O88942_S235	TB_04H-MOCK_00H	#NUM!		0	yes	3.61472	0.0246673
O88942	O88942			O88942_S235;O88942_S239	TB_04H-MOCK_00H	#NUM!		0	yes	4.14157	0.0173339
O88942	O88942			O88942_S235;O88942_S239;O88942_S241	TB_04H-MOCK_00H	0.032972	0.973154	0.990227	no	0.032972	0.973154
O88942	O88942			O88942_S241;O88942_T242	TB_04H-MOCK_00H	#NUM!		0	yes	4.5812	0.0367728
O89001	Cpd	carboxypeptidase D	12874	O89001_T1365;O89001_T1367	TB_04H-MOCK_00H	-0.815909	0.538644	0.838755	no	-0.815909	0.538644
O89001	Cpd	carboxypeptidase D	12874	O89001_T1367;O89001_T1371	TB_04H-MOCK_00H	#NUM!		0	yes	4.50542	0.0393987
O89032	Sh3pxd2a	SH3 and PX domains 2A	14218	O89032_S1008	TB_04H-MOCK_00H	-1.35028	0.012046	0.138532	no	-1.35028	0.012046
O89032	Sh3pxd2a	SH3 and PX domains 2A	14218	O89032_S1029	TB_04H-MOCK_00H	0.253504	0.74395	0.924577	no	0.253504	0.74395
O89032	Sh3pxd2a	SH3 and PX domains 2A	14218	O89032_S1029;O89032_S1034	TB_04H-MOCK_00H	#NUM!		0	yes	3.99326	0.0265479
O89032	Sh3pxd2a	SH3 and PX domains 2A	14218	O89032_S1034	TB_04H-MOCK_00H	0.960279	7.53956e-05	0.0042761	no	0.960279	7.53956e-05
O89032	Sh3pxd2a	SH3 and PX domains 2A	14218	O89032_S420	TB_04H-MOCK_00H	0.0937968	0.728554	0.917542	no	0.0937968	0.728554
O89032	Sh3pxd2a	SH3 and PX domains 2A	14218	O89032_S592	TB_04H-MOCK_00H	-0.726084	0.026826	0.212125	no	-0.726084	0.026826
O89032	Sh3pxd2a	SH3 and PX domains 2A	14218	O89032_S721	TB_04H-MOCK_00H	-0.287229	0.298467	0.665787	no	-0.287229	0.298467
O89032	Sh3pxd2a	SH3 and PX domains 2A	14218	O89032_S812	TB_04H-MOCK_00H	0.812353	0.0521632	0.309451	no	0.812353	0.0521632
O89032	Sh3pxd2a	SH3 and PX domains 2A	14218	O89032_S993	TB_04H-MOCK_00H	0.0537303	0.858689	0.963252	no	0.0537303	0.858689
O89053	Coro1a	coronin, actin binding protein 1A	12721	O89053_S422	TB_04H-MOCK_00H	-0.561601	0.459653	0.791354	no	-0.561601	0.459653
O89053	Coro1a	coronin, actin binding protein 1A	12721	O89053_T418	TB_04H-MOCK_00H	-0.885525	0.103279	0.421247	no	-0.885525	0.103279
O89079	Cope	coatomer protein complex, subunit epsilon	59042	O89079_S10	TB_04H-MOCK_00H	0.214009	0.650618	0.886956	no	0.214009	0.650618
O89086	Rbm3	RNA binding motif (RNP1, RRM) protein 3	19652	O89086_S133	TB_04H-MOCK_00H	0.781332	0.461825	0.793095	no	0.781332	0.461825
O89090	Sp1	trans-acting transcription factor 1	20683	O89090_S2	TB_04H-MOCK_00H	0.652939	0.269135	0.639865	no	0.652939	0.269135
O89090	Sp1	trans-acting transcription factor 1	20683	O89090_S58	TB_04H-MOCK_00H	-0.28349	0.457646	0.790251	no	-0.28349	0.457646
O89110	Casp8	caspase 8	12370	O89110_S188	TB_04H-MOCK_00H	0.190922	0.833655	0.956679	no	0.190922	0.833655
O89110	Casp8	caspase 8	12370	O89110_S213	TB_04H-MOCK_00H	1.43724	0.00499943	0.0799884	no	1.43724	0.00499943
P01101	Fos	FBJ osteosarcoma oncogene	14281	P01101_S364;P01101_S373	TB_04H-MOCK_00H	#NUM!		0	yes	9.991	0.0358919
P01101	Fos	FBJ osteosarcoma oncogene	14281	P01101_S371;P01101_S373	TB_04H-MOCK_00H	#NUM!		0	yes	6.39844	0.015563
P01899	H2-D1	histocompatibility 2, D region locus 1	14964	P01899_S350;P01899_S352	TB_04H-MOCK_00H	0.0549661	0.891975	0.972378	no	0.0549661	0.891975
P01899	H2-D1	histocompatibility 2, D region locus 1	14964	P01899_S350;P01899_S356	TB_04H-MOCK_00H	0.323535	0.576952	0.853941	no	0.323535	0.576952
P01899	H2-D1	histocompatibility 2, D region locus 1	14964	P01899_S353	TB_04H-MOCK_00H	-0.304484	0.438003	0.774034	no	-0.304484	0.438003
P01899	H2-D1	histocompatibility 2, D region locus 1	14964	P01899_S356	TB_04H-MOCK_00H	1.03903	0.00646425	0.0955693	no	1.03903	0.00646425
P01901	H2-K1	histocompatibility 2, K1, K region	14972	P01901_S354	TB_04H-MOCK_00H	1.02819	0.00420084	0.0727298	no	1.02819	0.00420084
P01901	H2-K1	histocompatibility 2, K1, K region	14972	P01901_S367	TB_04H-MOCK_00H	-0.404436	0.249204	0.618684	no	-0.404436	0.249204
P01901	H2-K1	histocompatibility 2, K1, K region	14972	P01901_T335;P01901_Y342	TB_04H-MOCK_00H	0.204721	0.728542	0.917542	no	0.204721	0.728542
P01901	H2-K1	histocompatibility 2, K1, K region	14972	P01901_T350;P01901_S351	TB_04H-MOCK_00H	-0.284659	0.581296	0.857285	no	-0.284659	0.581296
P04627	Araf	Araf proto-oncogene, serine/threonine kinase	11836	P04627_S157	TB_04H-MOCK_00H	1.03549	0.0144872	0.150809	no	1.03549	0.0144872
P04627	Araf	Araf proto-oncogene, serine/threonine kinase	11836	P04627_S175;P04627_S186	TB_04H-MOCK_00H	1.60788	0.0216114	0.189513	no	1.60788	0.0216114
P04627	Araf	Araf proto-oncogene, serine/threonine kinase	11836	P04627_S229	TB_04H-MOCK_00H	0.319565	0.315558	0.681345	no	0.319565	0.315558
P04627	Araf	Araf proto-oncogene, serine/threonine kinase	11836	P04627_S580	TB_04H-MOCK_00H	-0.198199	0.45026	0.785407	no	-0.198199	0.45026
P04627	Araf	Araf proto-oncogene, serine/threonine kinase	11836	P04627_Y155	TB_04H-MOCK_00H	-0.0918921	0.684269	0.898878	no	-0.0918921	0.684269
P05064	Aldoa	aldolase A, fructose-bisphosphate	11674	P05064_S36	TB_04H-MOCK_00H	-0.0350779	0.896113	0.972855	no	-0.0350779	0.896113
P05064	Aldoa	aldolase A, fructose-bisphosphate	11674	P05064_S39	TB_04H-MOCK_00H	0.300123	0.395018	0.747648	no	0.300123	0.395018
P05064	Aldoa	aldolase A, fructose-bisphosphate	11674	P05064_S46	TB_04H-MOCK_00H	-0.788235	0.161599	0.514847	no	-0.788235	0.161599
P05064	Aldoa	aldolase A, fructose-bisphosphate	11674	P05064_T37	TB_04H-MOCK_00H	0.169588	0.82676	0.954519	no	0.169588	0.82676
P05213	Tuba1b	tubulin, alpha 1B	22143	P05213_S340	TB_04H-MOCK_00H	0.676746	0.0107451	0.129629	no	0.676746	0.0107451
P05627	Jun	jun proto-oncogene	16476	P05627_S246	TB_04H-MOCK_00H	1.1408	0.00323292	0.0623736	no	1.1408	0.00323292
P05627	Jun	jun proto-oncogene	16476	P05627_T242;P05627_S246	TB_04H-MOCK_00H	-0.563722	0.310119	0.676447	no	-0.563722	0.310119
P06745	Gpi1	glucose phosphate isomerase 1	14751	P06745_S107	TB_04H-MOCK_00H	#NUM!		0	yes	5.87556	0.0285194
P06800	P06800			P06800_S1227	TB_04H-MOCK_00H	0.521389	0.279514	0.648421	no	0.521389	0.279514
P06800	P06800			P06800_S1260	TB_04H-MOCK_00H	0.815673	0.241553	0.613345	no	0.815673	0.241553
P06800	P06800			P06800_S1271	TB_04H-MOCK_00H	0.537564	0.655445	0.888371	no	0.537564	0.655445
P06800	P06800			P06800_S1282	TB_04H-MOCK_00H	-0.037212	0.95778	0.985144	no	-0.037212	0.95778
P06800	P06800			P06800_S1282;P06800_S1284	TB_04H-MOCK_00H	0.190282	0.516045	0.828931	no	0.190282	0.516045
P06800	P06800			P06800_S962	TB_04H-MOCK_00H	1.25937	0.127732	0.467379	no	1.25937	0.127732
P06800	P06800			P06800_T1225	TB_04H-MOCK_00H	1.16167	0.00218102	0.0484761	no	1.16167	0.00218102
P06800	P06800			P06800_T1265	TB_04H-MOCK_00H	0.448284	0.604799	0.868459	no	0.448284	0.604799
P07356	Anxa2	annexin A2	12306	P07356_S2	TB_04H-MOCK_00H	-0.0896433	0.743174	0.924577	no	-0.0896433	0.743174
P07356	Anxa2	annexin A2	12306	P07356_T3	TB_04H-MOCK_00H	-0.529636	0.0157333	0.157548	no	-0.529636	0.0157333
P08103	Hck	hemopoietic cell kinase	15162	P08103_S37	TB_04H-MOCK_00H	0.956243	0.307834	0.674832	no	0.956243	0.307834
P08103	Hck	hemopoietic cell kinase	15162	P08103_T200	TB_04H-MOCK_00H	1.79026	0.0690564	0.348139	no	1.79026	0.0690564
P08775	Polr2a	polymerase (RNA) II (DNA directed) polypeptide A	20020	P08775_S1845	TB_04H-MOCK_00H	-0.106271	0.74583	0.925465	no	-0.106271	0.74583
P08775	Polr2a	polymerase (RNA) II (DNA directed) polypeptide A	20020	P08775_S1875	TB_04H-MOCK_00H	#NUM!		0	yes	4.85857	0.0371978
P08775	Polr2a	polymerase (RNA) II (DNA directed) polypeptide A	20020	P08775_S1892	TB_04H-MOCK_00H	-0.309884	0.289702	0.658433	no	-0.309884	0.289702
P08775	Polr2a	polymerase (RNA) II (DNA directed) polypeptide A	20020	P08775_S1966	TB_04H-MOCK_00H	0.064913	0.785299	0.940623	no	0.064913	0.785299
P08775	Polr2a	polymerase (RNA) II (DNA directed) polypeptide A	20020	P08775_T1840;P08775_S1847	TB_04H-MOCK_00H	0.034874	0.928756	0.980489	no	0.034874	0.928756
P08775	Polr2a	polymerase (RNA) II (DNA directed) polypeptide A	20020	P08775_T1870;P08775_S1882	TB_04H-MOCK_00H	0.634977	0.158474	0.511581	no	0.634977	0.158474
P08775	Polr2a	polymerase (RNA) II (DNA directed) polypeptide A	20020	P08775_T1877	TB_04H-MOCK_00H	0.248731	0.55035	0.843798	no	0.248731	0.55035
P08775	Polr2a	polymerase (RNA) II (DNA directed) polypeptide A	20020	P08775_T1912	TB_04H-MOCK_00H	0.238029	0.688787	0.900722	no	0.238029	0.688787
P09411	Pgk1	phosphoglycerate kinase 1	18655	P09411_S203	TB_04H-MOCK_00H	-0.0863295	0.702848	0.904466	no	-0.0863295	0.702848
P09411	Pgk1	phosphoglycerate kinase 1	18655	P09411_S77;P09411_S87	TB_04H-MOCK_00H	-0.47691	0.747025	0.92617	no	-0.47691	0.747025
P09450	Junb	jun B proto-oncogene	16477	P09450_S248	TB_04H-MOCK_00H	2.17065	0.00475134	0.0769928	no	2.17065	0.00475134
P09450	Junb	jun B proto-oncogene	16477	P09450_S248;P09450_T252;P09450_S256	TB_04H-MOCK_00H	2.15441	0.000770402	0.0230014	no	2.15441	0.000770402
P09450	Junb	jun B proto-oncogene	16477	P09450_S256	TB_04H-MOCK_00H	1.01203	0.109266	0.434358	no	1.01203	0.109266
P09450	Junb	jun B proto-oncogene	16477	P09450_T104	TB_04H-MOCK_00H	#NUM!		0	yes	6.55982	0.0216668
P09450	Junb	jun B proto-oncogene	16477	P09450_T252	TB_04H-MOCK_00H	#NUM!		0	yes	5.0825	0.0302685
P09450	Junb	jun B proto-oncogene	16477	P09450_T252;P09450_S256	TB_04H-MOCK_00H	4.08289	1.35447e-14	8.91107e-11	no	4.08289	1.35447e-14
P09528	Fth1	ferritin heavy polypeptide 1	14319	P09528_S5	TB_04H-MOCK_00H	-0.0158153	0.987687	0.995708	no	-0.0158153	0.987687
P09528	Fth1	ferritin heavy polypeptide 1	14319	P09528_T2	TB_04H-MOCK_00H	#NUM!		0	yes	4.35784	0.0276921
P09528	Fth1	ferritin heavy polypeptide 1	14319	P09528_T3	TB_04H-MOCK_00H	0.881096	0.0649196	0.337329	no	0.881096	0.0649196
P09528	Fth1	ferritin heavy polypeptide 1	14319	P09528_T3;P09528_S5	TB_04H-MOCK_00H	-0.166491	0.864728	0.965226	no	-0.166491	0.864728
P0C7T6	Atxn1l	ataxin 1-like	52335	P0C7T6_T328	TB_04H-MOCK_00H	0.530286	0.310797	0.676447	no	0.530286	0.310797
P0DOV1	Ifi211	interferon activated gene 211	381308	P0DOV1_S190	TB_04H-MOCK_00H	-0.146475	0.662855	0.89125	no	-0.146475	0.662855
P0DOV2	Ifi204	interferon activated gene 204	15951	P0DOV2_S190	TB_04H-MOCK_00H	0.531065	0.0936262	0.405975	no	0.531065	0.0936262
P0DOV2	Ifi204	interferon activated gene 204	15951	P0DOV2_S195;P0DOV2_S205	TB_04H-MOCK_00H	-1.05191	0.357378	0.716607	no	-1.05191	0.357378
P0DOV2	Ifi204	interferon activated gene 204	15951	P0DOV2_T106	TB_04H-MOCK_00H	0.510008	0.28335	0.651348	no	0.510008	0.28335
P0DOV2	Ifi204	interferon activated gene 204	15951	P0DOV2_T90	TB_04H-MOCK_00H	0.804785	0.120325	0.45391	no	0.804785	0.120325
P10107	Anxa1	annexin A1	16952	P10107_S5	TB_04H-MOCK_00H	0.840777	0.523301	0.831392	no	0.840777	0.523301
P10923	Spp1	secreted phosphoprotein 1	20750	P10923_S283;P10923_S289	TB_04H-MOCK_00H	0.108845	0.829046	0.955646	no	0.108845	0.829046
P10923	Spp1	secreted phosphoprotein 1	20750	P10923_S290	TB_04H-MOCK_00H	0.775109	0.0352392	0.250907	no	0.775109	0.0352392
P11157	Rrm2	ribonucleotide reductase M2	20135	P11157_S20	TB_04H-MOCK_00H	-0.392724	0.494632	0.814288	no	-0.392724	0.494632
P11440	Cdk1	cyclin-dependent kinase 1	12534	P11440_T14	TB_04H-MOCK_00H	0.682104	0.0749712	0.362617	no	0.682104	0.0749712
P11440	Cdk1	cyclin-dependent kinase 1	12534	P11440_T14;P11440_Y15	TB_04H-MOCK_00H	-1.0571	0.281089	0.649328	no	-1.0571	0.281089
P11440	Cdk1	cyclin-dependent kinase 1	12534	P11440_Y15	TB_04H-MOCK_00H	-1.25314	0.303501	0.670946	no	-1.25314	0.303501
P11499	Hsp90ab1	heat shock protein 90 alpha (cytosolic), class B member 1	15516	P11499_S255	TB_04H-MOCK_00H	0.211514	0.732155	0.91907	no	0.211514	0.732155
P11835	Itgb2	integrin beta 2	16414	P11835_T760	TB_04H-MOCK_00H	-0.898705	0.0590194	0.323455	no	-0.898705	0.0590194
P11881	Itpr1	inositol 1,4,5-trisphosphate receptor 1	16438	P11881_S1588	TB_04H-MOCK_00H	-0.712548	0.0833874	0.384966	no	-0.712548	0.0833874
P12367	P12367			P12367_S96	TB_04H-MOCK_00H	0.117541	0.862117	0.963569	no	0.117541	0.862117
P12382	Pfkl	phosphofructokinase, liver, B-type	18641	P12382_S775	TB_04H-MOCK_00H	0.717135	0.0195642	0.178749	no	0.717135	0.0195642
P13808	Slc4a2	solute carrier family 4 (anion exchanger), member 2	20535	P13808_S172	TB_04H-MOCK_00H	-0.256422	0.839617	0.958667	no	-0.256422	0.839617
P13808	Slc4a2	solute carrier family 4 (anion exchanger), member 2	20535	P13808_S442;P13808_T455	TB_04H-MOCK_00H	-0.256327	0.764613	0.932244	no	-0.256327	0.764613
P13864	Dnmt1	DNA methyltransferase (cytosine-5) 1	13433	P13864_S125	TB_04H-MOCK_00H	-1.32933	0.033574	0.24407	no	-1.32933	0.033574
P13864	Dnmt1	DNA methyltransferase (cytosine-5) 1	13433	P13864_S138	TB_04H-MOCK_00H	0.125336	0.766337	0.933481	no	0.125336	0.766337
P13864	Dnmt1	DNA methyltransferase (cytosine-5) 1	13433	P13864_S140	TB_04H-MOCK_00H	-0.0873348	0.879066	0.969942	no	-0.0873348	0.879066
P13864	Dnmt1	DNA methyltransferase (cytosine-5) 1	13433	P13864_S717	TB_04H-MOCK_00H	0.0153195	0.963627	0.98657	no	0.0153195	0.963627
P14131	Rps16	ribosomal protein S16	20055	P14131_S3	TB_04H-MOCK_00H	#NUM!		0	yes	3.82314	0.0163364
P14152	Mdh1	malate dehydrogenase 1, NAD (soluble)	17449	P14152_S241	TB_04H-MOCK_00H	0.135432	0.735617	0.920728	no	0.135432	0.735617
P14733	Lmnb1	lamin B1	16906	P14733_S14	TB_04H-MOCK_00H	-1.17997	0.0116049	0.13513	no	-1.17997	0.0116049
P14733	Lmnb1	lamin B1	16906	P14733_S17	TB_04H-MOCK_00H	0.277312	0.375439	0.733377	no	0.277312	0.375439
P14733	Lmnb1	lamin B1	16906	P14733_S24	TB_04H-MOCK_00H	-0.114404	0.643651	0.882388	no	-0.114404	0.643651
P14733	Lmnb1	lamin B1	16906	P14733_S392	TB_04H-MOCK_00H	-0.207965	0.632379	0.877542	no	-0.207965	0.632379
P14733	Lmnb1	lamin B1	16906	P14733_S392;P14733_S394	TB_04H-MOCK_00H	-1.44675	0.187434	0.548193	no	-1.44675	0.187434
P14733	Lmnb1	lamin B1	16906	P14733_S392;P14733_S397	TB_04H-MOCK_00H	-1.28227	0.0808752	0.378434	no	-1.28227	0.0808752
P14733	Lmnb1	lamin B1	16906	P14733_S402	TB_04H-MOCK_00H	-1.44811	0.00500571	0.0799884	no	-1.44811	0.00500571
P14733	Lmnb1	lamin B1	16906	P14733_T5	TB_04H-MOCK_00H	-0.515081	0.178399	0.539119	no	-0.515081	0.178399
P14901	Hmox1	heme oxygenase 1	15368	P14901_S242	TB_04H-MOCK_00H	0.595407	0.0325658	0.239119	no	0.595407	0.0325658
P15066	Jund	jun D proto-oncogene	16478	P15066_S100	TB_04H-MOCK_00H	0.553305	0.00352105	0.0649544	no	0.553305	0.00352105
P15066	Jund	jun D proto-oncogene	16478	P15066_S245;P15066_S253	TB_04H-MOCK_00H	-0.535428	0.629731	0.876453	no	-0.535428	0.629731
P15066	Jund	jun D proto-oncogene	16478	P15066_S249;P15066_S253	TB_04H-MOCK_00H	0.62435	0.547416	0.843798	no	0.62435	0.547416
P15261	Ifngr1	interferon gamma receptor 1	15979	P15261_S300	TB_04H-MOCK_00H	-1.00447	0.102674	0.41982	no	-1.00447	0.102674
P15261	Ifngr1	interferon gamma receptor 1	15979	P15261_S370;P15261_T373	TB_04H-MOCK_00H	0.610928	0.387742	0.743109	no	0.610928	0.387742
P15261	Ifngr1	interferon gamma receptor 1	15979	P15261_S370;P15261_T375	TB_04H-MOCK_00H	-0.566664	0.691319	0.901589	no	-0.566664	0.691319
P15261	Ifngr1	interferon gamma receptor 1	15979	P15261_S379	TB_04H-MOCK_00H	-0.727282	0.135184	0.482053	no	-0.727282	0.135184
P15261	Ifngr1	interferon gamma receptor 1	15979	P15261_S381	TB_04H-MOCK_00H	-0.63592	0.153598	0.50602	no	-0.63592	0.153598
P15261	Ifngr1	interferon gamma receptor 1	15979	P15261_S402	TB_04H-MOCK_00H	-1.11437	0.0962197	0.410705	no	-1.11437	0.0962197
P15261	Ifngr1	interferon gamma receptor 1	15979	P15261_S404	TB_04H-MOCK_00H	-0.763014	0.473668	0.800865	no	-0.763014	0.473668
P15261	Ifngr1	interferon gamma receptor 1	15979	P15261_T373	TB_04H-MOCK_00H	-0.764463	0.0351141	0.250288	no	-0.764463	0.0351141
P15379	Cd44	CD44 antigen	12505	P15379_S733	TB_04H-MOCK_00H	-1.59269	0.0109961	0.130781	no	-1.59269	0.0109961
P15379	Cd44	CD44 antigen	12505	P15379_S754	TB_04H-MOCK_00H	0.0524311	0.957674	0.985144	no	0.0524311	0.957674
P15379	Cd44	CD44 antigen	12505	P15379_T726	TB_04H-MOCK_00H	-2.46467	0.000260299	0.0107032	no	-2.46467	0.000260299
P15533	Trim30a	tripartite motif-containing 30A	20128	P15533_S260	TB_04H-MOCK_00H	0.657393	0.033851	0.244945	no	0.657393	0.033851
P15533	Trim30a	tripartite motif-containing 30A	20128	P15533_S3	TB_04H-MOCK_00H	2.49587	0.275465	0.645624	no	2.49587	0.275465
P15864	Hist1h1c	histone cluster 1, H1c	50708	P15864_S102	TB_04H-MOCK_00H	-1.96	0.015248	0.154333	no	-1.96	0.015248
P15864	Hist1h1c	histone cluster 1, H1c	50708	P15864_S104	TB_04H-MOCK_00H	-0.571224	0.605638	0.868459	no	-0.571224	0.605638
P15864	Hist1h1c	histone cluster 1, H1c	50708	P15864_S2	TB_04H-MOCK_00H	0.00417152	0.983717	0.994602	no	0.00417152	0.983717
P15864	Hist1h1c	histone cluster 1, H1c	50708	P15864_S36	TB_04H-MOCK_00H	1.63974	9.12369e-07	0.00015796	no	1.63974	9.12369e-07
P15920	Atp6v0a2	ATPase, H+ transporting, lysosomal V0 subunit A2	21871	P15920_S695	TB_04H-MOCK_00H	0.148332	0.551894	0.844398	no	0.148332	0.551894
P15920	Atp6v0a2	ATPase, H+ transporting, lysosomal V0 subunit A2	21871	P15920_S700	TB_04H-MOCK_00H	0.754492	0.0635911	0.334607	no	0.754492	0.0635911
P16254	Srp14	signal recognition particle 14	20813	P16254_S45	TB_04H-MOCK_00H	-2.43864	7.01721e-08	2.00723e-05	no	-2.43864	7.01721e-08
P16330	Cnp	2',3'-cyclic nucleotide 3' phosphodiesterase	12799	P16330_S4	TB_04H-MOCK_00H	-0.234178	0.425093	0.765389	no	-0.234178	0.425093
P16330	Cnp	2',3'-cyclic nucleotide 3' phosphodiesterase	12799	P16330_T3;P16330_T6;P16330_T11	TB_04H-MOCK_00H	0.257221	0.69267	0.901714	no	0.257221	0.69267
P16858	Gapdh	glyceraldehyde-3-phosphate dehydrogenase	14433	P16858_S146	TB_04H-MOCK_00H	0.283927	0.343637	0.704296	no	0.283927	0.343637
P16858	Gapdh	glyceraldehyde-3-phosphate dehydrogenase	14433	P16858_S208	TB_04H-MOCK_00H	-0.136481	0.558642	0.845468	no	-0.136481	0.558642
P16872	Il7r	interleukin 7 receptor	16197	P16872_S375	TB_04H-MOCK_00H	1.1218	0.000229603	0.0095605	no	1.1218	0.000229603
P16879	Fes	feline sarcoma oncogene	14159	P16879_Y713	TB_04H-MOCK_00H	-0.187634	0.54778	0.843798	no	-0.187634	0.54778
P16951	Atf2	activating transcription factor 2	11909	P16951_S310	TB_04H-MOCK_00H	0.190348	0.554326	0.844901	no	0.190348	0.554326
P16951	Atf2	activating transcription factor 2	11909	P16951_S44	TB_04H-MOCK_00H	0.0145596	0.94776	0.983825	no	0.0145596	0.94776
P16951	Atf2	activating transcription factor 2	11909	P16951_S44;P16951_T53	TB_04H-MOCK_00H	0.00108273	0.998964	0.999587	no	0.00108273	0.998964
P16951	Atf2	activating transcription factor 2	11909	P16951_T51;P16951_T53	TB_04H-MOCK_00H	-1.2873	0.100771	0.415308	no	-1.2873	0.100771
P16951	Atf2	activating transcription factor 2	11909	P16951_T51;P16951_T55	TB_04H-MOCK_00H	-0.83154	0.187955	0.548605	no	-0.83154	0.187955
P17095	Hmga1	high mobility group AT-hook 1	15361	P17095_S102	TB_04H-MOCK_00H	0.584398	0.42391	0.765389	no	0.584398	0.42391
P17095	Hmga1	high mobility group AT-hook 1	15361	P17095_S102;P17095_S103	TB_04H-MOCK_00H	1.06032	0.340746	0.701639	no	1.06032	0.340746
P17095	Hmga1	high mobility group AT-hook 1	15361	P17095_S103	TB_04H-MOCK_00H	0.322203	0.780477	0.938885	no	0.322203	0.780477
P17095	Hmga1	high mobility group AT-hook 1	15361	P17095_S2	TB_04H-MOCK_00H	-0.544387	0.12768	0.467379	no	-0.544387	0.12768
P17095	Hmga1	high mobility group AT-hook 1	15361	P17095_S2;P17095_S4	TB_04H-MOCK_00H	0.166578	0.815759	0.94934	no	0.166578	0.815759
P17095	Hmga1	high mobility group AT-hook 1	15361	P17095_S2;P17095_S6	TB_04H-MOCK_00H	-0.0395683	0.970639	0.989896	no	-0.0395683	0.970639
P17095	Hmga1	high mobility group AT-hook 1	15361	P17095_S36	TB_04H-MOCK_00H	-0.0617122	0.937676	0.982304	no	-0.0617122	0.937676
P17095	Hmga1	high mobility group AT-hook 1	15361	P17095_S4	TB_04H-MOCK_00H	0.615219	0.11873	0.450475	no	0.615219	0.11873
P17095	Hmga1	high mobility group AT-hook 1	15361	P17095_S8	TB_04H-MOCK_00H	-0.805307	0.102259	0.418904	no	-0.805307	0.102259
P17095	Hmga1	high mobility group AT-hook 1	15361	P17095_S99;P17095_S102	TB_04H-MOCK_00H	1.19439	0.162052	0.515161	no	1.19439	0.162052
P17095	Hmga1	high mobility group AT-hook 1	15361	P17095_S99;P17095_S103	TB_04H-MOCK_00H	#NUM!		0	yes	7.0092	0.0427623
P17182	Eno1	enolase 1, alpha non-neuron	13806	P17182_Y25	TB_04H-MOCK_00H	#NUM!		0	yes	3.63496	0.0248908
P17426	Ap2a1	adaptor-related protein complex 2, alpha 1 subunit	11771	P17426_S5	TB_04H-MOCK_00H	-1.77364	0.222746	0.592578	no	-1.77364	0.222746
P17426	Ap2a1	adaptor-related protein complex 2, alpha 1 subunit	11771	P17426_T653	TB_04H-MOCK_00H	0.777196	0.118635	0.450475	no	0.777196	0.118635
P17751	Tpi1	triosephosphate isomerase 1	21991	P17751_S254	TB_04H-MOCK_00H	-0.516992	0.331112	0.694196	no	-0.516992	0.331112
P17751	Tpi1	triosephosphate isomerase 1	21991	P17751_S262	TB_04H-MOCK_00H	0.195855	0.306127	0.672803	no	0.195855	0.306127
P18052	Ptpra	protein tyrosine phosphatase, receptor type, A	19262	P18052_S204	TB_04H-MOCK_00H	#NUM!		0	yes	4.43825	0.0335128
P18052	Ptpra	protein tyrosine phosphatase, receptor type, A	19262	P18052_Y825	TB_04H-MOCK_00H	-0.262754	0.319419	0.684515	no	-0.262754	0.319419
P18581	Slc7a2	solute carrier family 7 (cationic amino acid transporter, y+ system), member 2	11988	P18581_S461;P18581_S463	TB_04H-MOCK_00H	0.420599	0.204274	0.570422	no	0.420599	0.204274
P18608	Hmgn1	high mobility group nucleosomal binding domain 1	15312	P18608_S7	TB_04H-MOCK_00H	1.46341	0.012528	0.140892	no	1.46341	0.012528
P18608	Hmgn1	high mobility group nucleosomal binding domain 1	15312	P18608_S84;P18608_S87	TB_04H-MOCK_00H	0.413792	0.565305	0.847541	no	0.413792	0.565305
P18608	Hmgn1	high mobility group nucleosomal binding domain 1	15312	P18608_S87	TB_04H-MOCK_00H	-1.11871	0.155847	0.508843	no	-1.11871	0.155847
P18608	Hmgn1	high mobility group nucleosomal binding domain 1	15312	P18608_S95	TB_04H-MOCK_00H	0.749547	0.156151	0.509331	no	0.749547	0.156151
P18608	Hmgn1	high mobility group nucleosomal binding domain 1	15312	P18608_T80	TB_04H-MOCK_00H	0.0528142	0.908752	0.976749	no	0.0528142	0.908752
P18608	Hmgn1	high mobility group nucleosomal binding domain 1	15312	P18608_T80;P18608_S84	TB_04H-MOCK_00H	-0.584224	0.450973	0.785987	no	-0.584224	0.450973
P18653	Rps6ka1	ribosomal protein S6 kinase polypeptide 1	20111	P18653_S352	TB_04H-MOCK_00H	-0.00547806	0.988995	0.996112	no	-0.00547806	0.988995
P18653	Rps6ka1	ribosomal protein S6 kinase polypeptide 1	20111	P18653_S352;P18653_S358	TB_04H-MOCK_00H	1.70066	0.00240274	0.0511573	no	1.70066	0.00240274
P18653	Rps6ka1	ribosomal protein S6 kinase polypeptide 1	20111	P18653_S369	TB_04H-MOCK_00H	1.23062	0.00276865	0.0553645	no	1.23062	0.00276865
P18653	Rps6ka1	ribosomal protein S6 kinase polypeptide 1	20111	P18653_S721	TB_04H-MOCK_00H	0.73871	0.00522192	0.0817977	no	0.73871	0.00522192
P18653	Rps6ka1	ribosomal protein S6 kinase polypeptide 1	20111	P18653_T348	TB_04H-MOCK_00H	1.62653	0.180411	0.541255	no	1.62653	0.180411
P18653	Rps6ka1	ribosomal protein S6 kinase polypeptide 1	20111	P18653_T722	TB_04H-MOCK_00H	0.500173	0.0535876	0.312749	no	0.500173	0.0535876
P18654	Rps6ka3	ribosomal protein S6 kinase polypeptide 3	110651	P18654_S227	TB_04H-MOCK_00H	-0.0615489	0.901453	0.975319	no	-0.0615489	0.901453
P18654	Rps6ka3	ribosomal protein S6 kinase polypeptide 3	110651	P18654_S369	TB_04H-MOCK_00H	-0.984874	0.0151672	0.153989	no	-0.984874	0.0151672
P18654	Rps6ka3	ribosomal protein S6 kinase polypeptide 3	110651	P18654_S369;P18654_S375	TB_04H-MOCK_00H	0.711111	0.166787	0.524017	no	0.711111	0.166787
P18654	Rps6ka3	ribosomal protein S6 kinase polypeptide 3	110651	P18654_S386	TB_04H-MOCK_00H	0.376714	0.657523	0.888995	no	0.376714	0.657523
P18654	Rps6ka3	ribosomal protein S6 kinase polypeptide 3	110651	P18654_S715	TB_04H-MOCK_00H	-0.0828955	0.608286	0.869982	no	-0.0828955	0.608286
P18654	Rps6ka3	ribosomal protein S6 kinase polypeptide 3	110651	P18654_T231	TB_04H-MOCK_00H	0.740021	0.221645	0.591155	no	0.740021	0.221645
P18654	Rps6ka3	ribosomal protein S6 kinase polypeptide 3	110651	P18654_T365	TB_04H-MOCK_00H	-0.541767	0.565645	0.847541	no	-0.541767	0.565645
P18654	Rps6ka3	ribosomal protein S6 kinase polypeptide 3	110651	P18654_T365;P18654_S375	TB_04H-MOCK_00H	1.50714	0.00377577	0.0676861	no	1.50714	0.00377577
P18654	Rps6ka3	ribosomal protein S6 kinase polypeptide 3	110651	P18654_T577	TB_04H-MOCK_00H	#NUM!		0	yes	8.64776	0.0439583
P18654	Rps6ka3	ribosomal protein S6 kinase polypeptide 3	110651	P18654_T738	TB_04H-MOCK_00H	0.33516	0.372303	0.731741	no	0.33516	0.372303
P18760	Cfl1	cofilin 1, non-muscle	12631	P18760_S3	TB_04H-MOCK_00H	0.16864	0.570099	0.850496	no	0.16864	0.570099
P19221	F2	coagulation factor II	14061	P19221_Y223;P19221_T230;P19221_T231;P19221_T246	TB_04H-MOCK_00H	#NUM!		0	yes	6.84293	0.046034
P19324	Serpinh1	serine (or cysteine) peptidase inhibitor, clade H, member 1	12406	P19324_S69;P19324_S75;P19324_S81;P19324_T87;P19324_S90	TB_04H-MOCK_00H	#NUM!		0	yes	-6.56464	0.0282292
P19426	Nelfe	negative elongation factor complex member E, Rdbp	27632	P19426_S115	TB_04H-MOCK_00H	0.165675	0.748663	0.926928	no	0.165675	0.748663
P19426	Nelfe	negative elongation factor complex member E, Rdbp	27632	P19426_S49	TB_04H-MOCK_00H	0.401528	0.808187	0.947276	no	0.401528	0.808187
P19426	Nelfe	negative elongation factor complex member E, Rdbp	27632	P19426_S51	TB_04H-MOCK_00H	0.589452	0.207364	0.574178	no	0.589452	0.207364
P19973	Lsp1	lymphocyte specific 1	16985	P19973_S168;P19973_S179	TB_04H-MOCK_00H	0.0349138	0.974354	0.99076	no	0.0349138	0.974354
P19973	Lsp1	lymphocyte specific 1	16985	P19973_S168;P19973_S179;P19973_S184	TB_04H-MOCK_00H	-0.5496	0.378961	0.737894	no	-0.5496	0.378961
P19973	Lsp1	lymphocyte specific 1	16985	P19973_S168;P19973_S180;P19973_S184	TB_04H-MOCK_00H	-0.595934	0.486912	0.808806	no	-0.595934	0.486912
P19973	Lsp1	lymphocyte specific 1	16985	P19973_S179;P19973_S184	TB_04H-MOCK_00H	-0.236619	0.757399	0.92979	no	-0.236619	0.757399
P19973	Lsp1	lymphocyte specific 1	16985	P19973_S180;P19973_S184	TB_04H-MOCK_00H	0.828498	0.180238	0.541206	no	0.828498	0.180238
P19973	Lsp1	lymphocyte specific 1	16985	P19973_S195	TB_04H-MOCK_00H	0.280955	0.692698	0.901714	no	0.280955	0.692698
P19973	Lsp1	lymphocyte specific 1	16985	P19973_S203	TB_04H-MOCK_00H	0.583839	0.244939	0.616211	no	0.583839	0.244939
P19973	Lsp1	lymphocyte specific 1	16985	P19973_S239;P19973_S243	TB_04H-MOCK_00H	0.155585	0.736216	0.92083	no	0.155585	0.736216
P19973	Lsp1	lymphocyte specific 1	16985	P19973_S243	TB_04H-MOCK_00H	0.464606	0.177875	0.538783	no	0.464606	0.177875
P19973	Lsp1	lymphocyte specific 1	16985	P19973_S248	TB_04H-MOCK_00H	#NUM!		0	yes	-7.90066	0.0482926
P19973	Lsp1	lymphocyte specific 1	16985	P19973_T166;P19973_S168	TB_04H-MOCK_00H	-2.84074	0.000113986	0.0055584	no	-2.84074	0.000113986
P19973	Lsp1	lymphocyte specific 1	16985	P19973_T166;P19973_S168;P19973_S179	TB_04H-MOCK_00H	#NUM!		0	yes	-7.32659	0.0229309
P19973	Lsp1	lymphocyte specific 1	16985	P19973_T166;P19973_S168;P19973_S179;P19973_S184	TB_04H-MOCK_00H	-2.22691	0.0610271	0.327823	no	-2.22691	0.0610271
P19973	Lsp1	lymphocyte specific 1	16985	P19973_T166;P19973_S168;P19973_S180	TB_04H-MOCK_00H	-1.54895	0.190108	0.552515	no	-1.54895	0.190108
P19973	Lsp1	lymphocyte specific 1	16985	P19973_T175	TB_04H-MOCK_00H	#NUM!		0	yes	-8.21706	0.018613
P20029	Hspa5	heat shock protein 5	14828	P20029_T644	TB_04H-MOCK_00H	#NUM!		0	yes	-5.57431	0.0217004
P20060	Hexb	hexosaminidase B	15212	P20060_T497;P20060_Y505	TB_04H-MOCK_00H	1.17417	0.208272	0.575017	no	1.17417	0.208272
P20152	Vim	vimentin	22352	P20152_S144	TB_04H-MOCK_00H	0.533417	0.106597	0.428662	no	0.533417	0.106597
P20152	Vim	vimentin	22352	P20152_S18	TB_04H-MOCK_00H	-0.371837	0.605395	0.868459	no	-0.371837	0.605395
P20152	Vim	vimentin	22352	P20152_S2;P20152_S7	TB_04H-MOCK_00H	-1.04019	0.642267	0.881592	no	-1.04019	0.642267
P20152	Vim	vimentin	22352	P20152_S214	TB_04H-MOCK_00H	0.997135	0.0442231	0.281377	no	0.997135	0.0442231
P20152	Vim	vimentin	22352	P20152_S278	TB_04H-MOCK_00H	#NUM!		0	yes	3.34504	0.0372872
P20152	Vim	vimentin	22352	P20152_S325	TB_04H-MOCK_00H	0.640273	0.299042	0.665787	no	0.640273	0.299042
P20152	Vim	vimentin	22352	P20152_S39	TB_04H-MOCK_00H	-0.762111	0.0560747	0.318305	no	-0.762111	0.0560747
P20152	Vim	vimentin	22352	P20152_S419	TB_04H-MOCK_00H	1.31367	0.0168025	0.162826	no	1.31367	0.0168025
P20152	Vim	vimentin	22352	P20152_S420	TB_04H-MOCK_00H	4.40259	0.0243682	0.200735	no	4.40259	0.0243682
P20152	Vim	vimentin	22352	P20152_S430	TB_04H-MOCK_00H	2.15322	1.31913e-05	0.00122561	no	2.15322	1.31913e-05
P20152	Vim	vimentin	22352	P20152_S438	TB_04H-MOCK_00H	0.400755	0.247807	0.61787	no	0.400755	0.247807
P20152	Vim	vimentin	22352	P20152_S459	TB_04H-MOCK_00H	-0.0774961	0.75329	0.928418	no	-0.0774961	0.75329
P20152	Vim	vimentin	22352	P20152_S47	TB_04H-MOCK_00H	1.50543	0.0037108	0.0672545	no	1.50543	0.0037108
P20152	Vim	vimentin	22352	P20152_S49	TB_04H-MOCK_00H	1.42396	0.00276858	0.0553645	no	1.42396	0.00276858
P20152	Vim	vimentin	22352	P20152_S5	TB_04H-MOCK_00H	-0.143614	0.834012	0.956679	no	-0.143614	0.834012
P20152	Vim	vimentin	22352	P20152_S54	TB_04H-MOCK_00H	4.424	0.0625289	0.332457	no	4.424	0.0625289
P20152	Vim	vimentin	22352	P20152_S55	TB_04H-MOCK_00H	0.389252	0.549018	0.843798	no	0.389252	0.549018
P20152	Vim	vimentin	22352	P20152_S65	TB_04H-MOCK_00H	0.0434123	0.89344	0.972686	no	0.0434123	0.89344
P20152	Vim	vimentin	22352	P20152_S7	TB_04H-MOCK_00H	0.754585	0.534282	0.837548	no	0.754585	0.534282
P20152	Vim	vimentin	22352	P20152_S72	TB_04H-MOCK_00H	-0.195983	0.854484	0.962928	no	-0.195983	0.854484
P20152	Vim	vimentin	22352	P20152_S73	TB_04H-MOCK_00H	-2.3947	0.021911	0.190426	no	-2.3947	0.021911
P20152	Vim	vimentin	22352	P20152_S8;P20152_Y11	TB_04H-MOCK_00H	-1.83594	0.14809	0.499376	no	-1.83594	0.14809
P20152	Vim	vimentin	22352	P20152_S9	TB_04H-MOCK_00H	-0.775414	0.236754	0.610333	no	-0.775414	0.236754
P20152	Vim	vimentin	22352	P20152_T426	TB_04H-MOCK_00H	1.44261	0.0823061	0.38295	no	1.44261	0.0823061
P20152	Vim	vimentin	22352	P20152_T436	TB_04H-MOCK_00H	0.442298	0.425532	0.765644	no	0.442298	0.425532
P20152	Vim	vimentin	22352	P20152_T458	TB_04H-MOCK_00H	0.460439	0.64299	0.882023	no	0.460439	0.64299
P20152	Vim	vimentin	22352	P20152_T48	TB_04H-MOCK_00H	1.43599	0.0570537	0.320195	no	1.43599	0.0570537
P20152	Vim	vimentin	22352	P20152_T63	TB_04H-MOCK_00H	-0.451613	0.503619	0.819314	no	-0.451613	0.503619
P20152	Vim	vimentin	22352	P20152_Y53	TB_04H-MOCK_00H	1.0043	0.00634562	0.0942389	no	1.0043	0.00634562
P20491	Fcer1g	Fc receptor, IgE, high affinity I, gamma polypeptide	14127	P20491_S72	TB_04H-MOCK_00H	1.3281	0.0568942	0.320195	no	1.3281	0.0568942
P20491	Fcer1g	Fc receptor, IgE, high affinity I, gamma polypeptide	14127	P20491_T70	TB_04H-MOCK_00H	-0.942269	0.0292711	0.223983	no	-0.942269	0.0292711
P20491	Fcer1g	Fc receptor, IgE, high affinity I, gamma polypeptide	14127	P20491_T75	TB_04H-MOCK_00H	#NUM!		0	yes	-10.299	0.0139742
P20491	Fcer1g	Fc receptor, IgE, high affinity I, gamma polypeptide	14127	P20491_T78	TB_04H-MOCK_00H	2.33334	0.031351	0.234651	no	2.33334	0.031351
P20491	Fcer1g	Fc receptor, IgE, high affinity I, gamma polypeptide	14127	P20491_Y76	TB_04H-MOCK_00H	-2.22084	0.152397	0.505063	no	-2.22084	0.152397
P20934	Evi2a	ecotropic viral integration site 2a	14017	P20934_S197	TB_04H-MOCK_00H	0.184022	0.770048	0.934926	no	0.184022	0.770048
P20934	Evi2a	ecotropic viral integration site 2a	14017	P20934_S197;P20934_S203	TB_04H-MOCK_00H	2.29599	1.21277e-05	0.00120891	no	2.29599	1.21277e-05
P20934	Evi2a	ecotropic viral integration site 2a	14017	P20934_S197;P20934_T208	TB_04H-MOCK_00H	#NUM!		0	yes	4.75988	0.0137291
P20934	Evi2a	ecotropic viral integration site 2a	14017	P20934_S203	TB_04H-MOCK_00H	#NUM!		0	yes	8.47015	0.0379727
P20934	Evi2a	ecotropic viral integration site 2a	14017	P20934_T187	TB_04H-MOCK_00H	-0.166061	0.881342	0.970015	no	-0.166061	0.881342
P20934	Evi2a	ecotropic viral integration site 2a	14017	P20934_T195	TB_04H-MOCK_00H	1.1309	0.0206895	0.18469	no	1.1309	0.0206895
P20934	Evi2a	ecotropic viral integration site 2a	14017	P20934_T208	TB_04H-MOCK_00H	0.116936	0.748841	0.926928	no	0.116936	0.748841
P21619	Lmnb2	lamin B2	16907	P21619_S397	TB_04H-MOCK_00H	0.0478259	0.91824	0.977823	no	0.0478259	0.91824
P21619	Lmnb2	lamin B2	16907	P21619_S398;P21619_S401	TB_04H-MOCK_00H	-0.824931	0.168753	0.52665	no	-0.824931	0.168753
P21619	Lmnb2	lamin B2	16907	P21619_S399	TB_04H-MOCK_00H	-0.319628	0.547511	0.843798	no	-0.319628	0.547511
P21619	Lmnb2	lamin B2	16907	P21619_S400	TB_04H-MOCK_00H	-0.605121	0.0892873	0.396371	no	-0.605121	0.0892873
P21619	Lmnb2	lamin B2	16907	P21619_S400;P21619_S402	TB_04H-MOCK_00H	-0.615822	0.328503	0.691984	no	-0.615822	0.328503
P21619	Lmnb2	lamin B2	16907	P21619_S400;P21619_S403	TB_04H-MOCK_00H	0.070592	0.934388	0.981846	no	0.070592	0.934388
P21619	Lmnb2	lamin B2	16907	P21619_S402	TB_04H-MOCK_00H	-0.501457	0.0611832	0.327823	no	-0.501457	0.0611832
P21619	Lmnb2	lamin B2	16907	P21619_S429	TB_04H-MOCK_00H	-0.850127	0.257384	0.629023	no	-0.850127	0.257384
P22682	Cbl	Casitas B-lineage lymphoma	12402	P22682_S617	TB_04H-MOCK_00H	0.2546	0.487092	0.808806	no	0.2546	0.487092
P22893	Zfp36	zinc finger protein 36	22695	P22893_S105	TB_04H-MOCK_00H	#NUM!		0	yes	4.67358	0.0215689
[truncated: 5,893 more rows]

## Sheet: 6H
Protein	Gene	ProteinName	EntrezID	Uniprot_PTM	Comparison	log2FC	pvalue	adj.pvalue	imputed	iLog2FC	iPvalue
[truncated: 6,806 more rows]

[truncated: 2 more sheets: 8H, 24H]
