# Supplementary material for: Dynamic post-translational modification profiling of Mycobacterium tuberculosis-infected primary macrophages
Source: eLife. 2020 Jan 17;9:e51461. doi: 10.7554/eLife.51461 (PMC7030789; doi:10.7554/eLife.51461)
Supplement: Supplementary file 6. [file elife-51461-supp6.xlsx]

## Sheet: 24H
Protein	Gene	Entry.name	Uniprot_PTM	Comparison	log2FC	pvalue	adj.pvalue	imputed	iLog2FC	iPvalue	Protein.names
A1L314	Mpeg1	MPEG1_MOUSE	A1L314_K142	TB_24H-MOCK_24H	#NUM!		0	yes	4.75545	0.0289389	Macrophage-expressed gene 1 protein (Macrophage gene 1 protein) (Mpg-1) (Protein MPS1)
A1L314	Mpeg1	MPEG1_MOUSE	A1L314_K128	TB_24H-MOCK_24H	#NUM!		0	yes	3.58945	0.0148834	Macrophage-expressed gene 1 protein (Macrophage gene 1 protein) (Mpg-1) (Protein MPS1)
A2ADY9	Ddi2	DDI2_MOUSE	A2ADY9_K283	TB_24H-MOCK_24H	-0.0551809	0.820814	0.895638	no	-0.0551809	0.895638	Protein DDI1 homolog 2
A2ADY9	Ddi2	DDI2_MOUSE	A2ADY9_K289	TB_24H-MOCK_24H	-0.398821	0.0913699	0.214544	no	-0.398821	0.214544	Protein DDI1 homolog 2
A2AGT5	Ckap5	CKAP5_MOUSE	A2AGT5_K96	TB_24H-MOCK_24H	1.64433	0.00290352	0.0159945	no	1.64433	0.0159945	Cytoskeleton-associated protein 5
A2AQH4	Bcorl1	BCORL_MOUSE	Q8CGN4_K1464,A2AQH4_K1491	TB_24H-MOCK_24H	-1.07738	0.034733	0.107998	no	-1.07738	0.107998	BCL-6 corepressor-like protein 1 (BCoR-L1) (BCoR-like protein 1)
A2ASS6	Ttn	TITIN_MOUSE	A2ASS6_K10237	TB_24H-MOCK_24H	-1.66313	7.20712e-12	1.20107e-09	no	-1.66313	1.20107e-09	Titin (EC 2.7.11.1) (Connectin)
A2ASS6	Ttn	TITIN_MOUSE	A2ASS6_K28284,A2ASS6_K28292,A2ASS6_K28296	TB_24H-MOCK_24H	#NUM!		0	yes	-3.82592	0.0124703	Titin (EC 2.7.11.1) (Connectin)
A2ASS6	Ttn	TITIN_MOUSE	A2ASS6_K4389	TB_24H-MOCK_24H	0.218888	0.769068	0.860391	no	0.218888	0.860391	Titin (EC 2.7.11.1) (Connectin)
A2ASS6	Ttn	TITIN_MOUSE	A2ASS6_K25781	TB_24H-MOCK_24H	-1.56255	0.369737	0.556879	no	-1.56255	0.556879	Titin (EC 2.7.11.1) (Connectin)
A2ASS6	Ttn	TITIN_MOUSE	A2ASS6_K12395	TB_24H-MOCK_24H	4.57483	0.00117696	0.00746502	no	4.57483	0.00746502	Titin (EC 2.7.11.1) (Connectin)
A6H8H2	Dennd4c	DEN4C_MOUSE	A6H8H2_K1363	TB_24H-MOCK_24H	-0.644157	0.122382	0.264302	no	-0.644157	0.264302	DENN domain-containing protein 4C
A6H8H2	Dennd4c	DEN4C_MOUSE	A6H8H2_K808	TB_24H-MOCK_24H	1.0425	0.0156858	0.0582094	no	1.0425	0.0582094	DENN domain-containing protein 4C
A6H8H2	Dennd4c	DEN4C_MOUSE	A6H8H2_K1359	TB_24H-MOCK_24H	-0.304059	0.459497	0.64	no	-0.304059	0.64	DENN domain-containing protein 4C
A8Y5H7	Sec14l1	S14L1_MOUSE	A8Y5H7_K352	TB_24H-MOCK_24H	0.628348	0.0302922	0.0964504	no	0.628348	0.0964504	SEC14-like protein 1
B2RSH2	Gnai1	GNAI1_MOUSE	Q9DC51_K54,B2RSH2_K54,P20612_K50,Q3V3I2_K54,P50149_K54,P18872_K54,O70443_K54,P08752_K54	TB_24H-MOCK_24H	1.01518	0.0014827	0.00911375	no	1.01518	0.00911375	Guanine nucleotide-binding protein G(i) subunit alpha-1 (Adenylate cyclase-inhibiting G alpha protein)
B2RSH2	Gnai1	GNAI1_MOUSE	Q9DC51_K46,B2RSH2_K46,P20612_K42,Q3V3I2_K46,P50149_K46,P18872_K46,Q8CGK7_K55,Q6R0H7_K792,P08752_K46,P63094_K53	TB_24H-MOCK_24H	0.14546	0.628041	0.765398	no	0.14546	0.765398	Guanine nucleotide-binding protein G(i) subunit alpha-1 (Adenylate cyclase-inhibiting G alpha protein)
B2RSH2	Gnai1	GNAI1_MOUSE	Q9DC51_K35,B2RSH2_K35,P08752_K35	TB_24H-MOCK_24H	0.421879	0.274794	0.460981	no	0.421879	0.460981	Guanine nucleotide-binding protein G(i) subunit alpha-1 (Adenylate cyclase-inhibiting G alpha protein)
B2RUR8	Otud7b	OTU7B_MOUSE	B2RUR8_K511	TB_24H-MOCK_24H	0.468344	0.0160591	0.0593182	no	0.468344	0.0593182	OTU domain-containing protein 7B (EC 3.4.19.12) (Cellular zinc finger anti-NF-kappa-B protein) (Zinc finger A20 domain-containing protein 1) (Zinc finger protein Cezanne)
B9EJ86	Osbpl8	OSBL8_MOUSE	B9EJ86_K626	TB_24H-MOCK_24H	#NUM!		0	yes	5.59743	0.0214719	Oxysterol-binding protein-related protein 8 (ORP-8) (OSBP-related protein 8)
B9EJ86	Osbpl8	OSBL8_MOUSE	B9EJ86_K769	TB_24H-MOCK_24H	-0.361929	0.545004	0.703118	no	-0.361929	0.703118	Oxysterol-binding protein-related protein 8 (ORP-8) (OSBP-related protein 8)
D0QMC3	Mndal	MNDAL_MOUSE	D0QMC3_K102,O35368_K102	TB_24H-MOCK_24H	0.700992	0.278321	0.46494	no	0.700992	0.46494	Myeloid cell nuclear differentiation antigen-like protein
D0QMC3	Mndal	MNDAL_MOUSE	P0DOV2_K170,D0QMC3_K256	TB_24H-MOCK_24H	0.451364	0.501941	0.67347	no	0.451364	0.67347	Myeloid cell nuclear differentiation antigen-like protein
D0QMC3	Mndal	MNDAL_MOUSE	D0QMC3_K122,O35368_K122	TB_24H-MOCK_24H	1.14867	0.0581521	0.155855	no	1.14867	0.155855	Myeloid cell nuclear differentiation antigen-like protein
D0QMC3	Mndal	MNDAL_MOUSE	D0QMC3_K136	TB_24H-MOCK_24H	#NUM!		0	yes	4.0698	0.0292085	Myeloid cell nuclear differentiation antigen-like protein
E9Q3E1	Aldh3b2	AL3B2_MOUSE	Q80VQ0_K289,J3QMK6_K302,E9Q3E1_K302	TB_24H-MOCK_24H	0.31173	0.548354	0.705723	no	0.31173	0.705723	Aldehyde dehydrogenase family 3 member B2 (EC 1.2.1.3) (Aldehyde dehydrogenase 8)
E9Q555	Rnf213	RN213_MOUSE	E9Q555_K2906	TB_24H-MOCK_24H	#NUM!		0	yes	4.4318	0.022429	E3 ubiquitin-protein ligase RNF213 (EC 3.6.4.-) (EC 6.3.2.-) (Mysterin) (RING finger protein 213)
E9Q555	Rnf213	RN213_MOUSE	E9Q555_K3537	TB_24H-MOCK_24H	2.00214	0.00342739	0.0182488	no	2.00214	0.0182488	E3 ubiquitin-protein ligase RNF213 (EC 3.6.4.-) (EC 6.3.2.-) (Mysterin) (RING finger protein 213)
E9Q555	Rnf213	RN213_MOUSE	E9Q555_K2839	TB_24H-MOCK_24H	1.89757	0.000618795	0.00432071	no	1.89757	0.00432071	E3 ubiquitin-protein ligase RNF213 (EC 3.6.4.-) (EC 6.3.2.-) (Mysterin) (RING finger protein 213)
E9Q555	Rnf213	RN213_MOUSE	E9Q555_K2426	TB_24H-MOCK_24H	1.45332	0.139799	0.294003	no	1.45332	0.294003	E3 ubiquitin-protein ligase RNF213 (EC 3.6.4.-) (EC 6.3.2.-) (Mysterin) (RING finger protein 213)
E9Q555	Rnf213	RN213_MOUSE	E9Q555_K483	TB_24H-MOCK_24H	3.51209	6.4531e-07	1.51078e-05	no	3.51209	1.51078e-05	E3 ubiquitin-protein ligase RNF213 (EC 3.6.4.-) (EC 6.3.2.-) (Mysterin) (RING finger protein 213)
E9Q555	Rnf213	RN213_MOUSE	E9Q555_K3547	TB_24H-MOCK_24H	#NUM!		0	yes	4.18683	0.0166495	E3 ubiquitin-protein ligase RNF213 (EC 3.6.4.-) (EC 6.3.2.-) (Mysterin) (RING finger protein 213)
E9Q555	Rnf213	RN213_MOUSE	E9Q555_K2303	TB_24H-MOCK_24H	1.74117	0.0019568	0.0115379	no	1.74117	0.0115379	E3 ubiquitin-protein ligase RNF213 (EC 3.6.4.-) (EC 6.3.2.-) (Mysterin) (RING finger protein 213)
E9Q555	Rnf213	RN213_MOUSE	E9Q555_K2398	TB_24H-MOCK_24H	#NUM!		0	yes	6.69354	0.0112865	E3 ubiquitin-protein ligase RNF213 (EC 3.6.4.-) (EC 6.3.2.-) (Mysterin) (RING finger protein 213)
E9Q555	Rnf213	RN213_MOUSE	E9Q555_K4381	TB_24H-MOCK_24H	#NUM!		0	yes	5.61573	0.0137587	E3 ubiquitin-protein ligase RNF213 (EC 3.6.4.-) (EC 6.3.2.-) (Mysterin) (RING finger protein 213)
E9Q555	Rnf213	RN213_MOUSE	E9Q555_K1972	TB_24H-MOCK_24H	#NUM!		0	yes	6.39041	0.0319218	E3 ubiquitin-protein ligase RNF213 (EC 3.6.4.-) (EC 6.3.2.-) (Mysterin) (RING finger protein 213)
E9Q555	Rnf213	RN213_MOUSE	E9Q555_K4915	TB_24H-MOCK_24H	2.28106	1.58684e-05	0.000192843	no	2.28106	0.000192843	E3 ubiquitin-protein ligase RNF213 (EC 3.6.4.-) (EC 6.3.2.-) (Mysterin) (RING finger protein 213)
E9Q555	Rnf213	RN213_MOUSE	E9Q555_K2424	TB_24H-MOCK_24H	0.608191	0.496956	0.669335	no	0.608191	0.669335	E3 ubiquitin-protein ligase RNF213 (EC 3.6.4.-) (EC 6.3.2.-) (Mysterin) (RING finger protein 213)
E9Q555	Rnf213	RN213_MOUSE	E9Q555_K4285	TB_24H-MOCK_24H	1.85298	0.00837176	0.0359241	no	1.85298	0.0359241	E3 ubiquitin-protein ligase RNF213 (EC 3.6.4.-) (EC 6.3.2.-) (Mysterin) (RING finger protein 213)
E9Q555	Rnf213	RN213_MOUSE	E9Q555_K2097	TB_24H-MOCK_24H	0.0599054	0.935376	0.959859	no	0.0599054	0.959859	E3 ubiquitin-protein ligase RNF213 (EC 3.6.4.-) (EC 6.3.2.-) (Mysterin) (RING finger protein 213)
E9Q555	Rnf213	RN213_MOUSE	E9Q555_K1970	TB_24H-MOCK_24H	#NUM!		0	yes	4.49246	0.0184762	E3 ubiquitin-protein ligase RNF213 (EC 3.6.4.-) (EC 6.3.2.-) (Mysterin) (RING finger protein 213)
E9Q555	Rnf213	RN213_MOUSE	E9Q555_K2408	TB_24H-MOCK_24H	0.81232	0.000686985	0.00473455	no	0.81232	0.00473455	E3 ubiquitin-protein ligase RNF213 (EC 3.6.4.-) (EC 6.3.2.-) (Mysterin) (RING finger protein 213)
E9Q555	Rnf213	RN213_MOUSE	E9Q555_K4293	TB_24H-MOCK_24H	#NUM!		0	yes	5.15985	0.0206223	E3 ubiquitin-protein ligase RNF213 (EC 3.6.4.-) (EC 6.3.2.-) (Mysterin) (RING finger protein 213)
E9Q555	Rnf213	RN213_MOUSE	E9Q555_K4743	TB_24H-MOCK_24H	#NUM!		0	yes	5.15016	0.0195647	E3 ubiquitin-protein ligase RNF213 (EC 3.6.4.-) (EC 6.3.2.-) (Mysterin) (RING finger protein 213)
E9Q555	Rnf213	RN213_MOUSE	E9Q555_K419	TB_24H-MOCK_24H	0.928412	0.360828	0.546802	no	0.928412	0.546802	E3 ubiquitin-protein ligase RNF213 (EC 3.6.4.-) (EC 6.3.2.-) (Mysterin) (RING finger protein 213)
E9Q634	Myo1e	MYO1E_MOUSE	P70248_K194,E9Q634_K196	TB_24H-MOCK_24H	0.433496	0.307589	0.496634	no	0.433496	0.496634	Unconventional myosin-Ie (Unconventional myosin 1E)
E9Q634	Myo1e	MYO1E_MOUSE	E9Q634_K40	TB_24H-MOCK_24H	1.80129	0.000193763	0.00166741	no	1.80129	0.00166741	Unconventional myosin-Ie (Unconventional myosin 1E)
E9Q634	Myo1e	MYO1E_MOUSE	E9Q634_K41	TB_24H-MOCK_24H	-1.07878	0.00423471	0.021267	no	-1.07878	0.021267	Unconventional myosin-Ie (Unconventional myosin 1E)
E9Q9A9	Oas2	OAS2_MOUSE	E9Q9A9_K203	TB_24H-MOCK_24H	#NUM!		0	yes	3.25026	0.0106295	2'-5'-oligoadenylate synthase 2 ((2-5')oligo(A) synthase 2) (2-5A synthase 2) (EC 2.7.7.84) (2',5'-oligoadenylate synthetase-like 11)
E9Q9A9	Oas2	OAS2_MOUSE	E9Q9A9_K105	TB_24H-MOCK_24H	#NUM!		0	yes	5.09327	0.0318674	2'-5'-oligoadenylate synthase 2 ((2-5')oligo(A) synthase 2) (2-5A synthase 2) (EC 2.7.7.84) (2',5'-oligoadenylate synthetase-like 11)
E9QAM5	Helz2	HELZ2_MOUSE	E9QAM5_K1429	TB_24H-MOCK_24H	#NUM!		0	yes	4.72492	0.0110282	Helicase with zinc finger domain 2 (EC 3.6.4.-) (PPAR-gamma DNA-binding domain-interacting protein 1) (PDIP1) (PPAR-gamma DBD-interacting protein 1)
E9QAM5	Helz2	HELZ2_MOUSE	E9QAM5_K1674	TB_24H-MOCK_24H	#NUM!		0	yes	6.2014	0.0420172	Helicase with zinc finger domain 2 (EC 3.6.4.-) (PPAR-gamma DNA-binding domain-interacting protein 1) (PDIP1) (PPAR-gamma DBD-interacting protein 1)
F2Z461	Herc6	HERC6_MOUSE	F2Z461_K122	TB_24H-MOCK_24H	#NUM!		0	yes	5.27786	0.0259669	E3 ISG15--protein ligase Herc6 (EC 2.3.2.-)
F2Z461	Herc6	HERC6_MOUSE	F2Z461_K389	TB_24H-MOCK_24H	#NUM!		0	yes	5.7222	0.0225922	E3 ISG15--protein ligase Herc6 (EC 2.3.2.-)
F2Z461	Herc6	HERC6_MOUSE	F2Z461_K163	TB_24H-MOCK_24H	#NUM!		0	yes	5.64268	0.0462841	E3 ISG15--protein ligase Herc6 (EC 2.3.2.-)
F2Z461	Herc6	HERC6_MOUSE	F2Z461_K175	TB_24H-MOCK_24H	#NUM!		0	yes	7.001	0.0499405	E3 ISG15--protein ligase Herc6 (EC 2.3.2.-)
F7BJB9	Morc3	MORC3_MOUSE	F7BJB9_K894	TB_24H-MOCK_24H	0.109763	0.676692	0.796902	no	0.109763	0.796902	MORC family CW-type zinc finger protein 3 (Nuclear matrix protein 2) (Zinc finger CW-type coiled-coil domain protein 3)
G5E829	Atp2b1	AT2B1_MOUSE	G5E829_K62	TB_24H-MOCK_24H	-0.224631	0.852154	0.91417	no	-0.224631	0.91417	Plasma membrane calcium-transporting ATPase 1 (PMCA1) (EC 3.6.3.8) (Plasma membrane calcium ATPase isoform 1) (Plasma membrane calcium pump isoform 1)
G5E829	Atp2b1	AT2B1_MOUSE	G5E829_K64	TB_24H-MOCK_24H	-0.447148	0.164377	0.329229	no	-0.447148	0.329229	Plasma membrane calcium-transporting ATPase 1 (PMCA1) (EC 3.6.3.8) (Plasma membrane calcium ATPase isoform 1) (Plasma membrane calcium pump isoform 1)
G5E829	Atp2b1	AT2B1_MOUSE	G5E829_K806,Q6Q477_K795,Q9R0K7_K784	TB_24H-MOCK_24H	-0.213537	0.567728	0.721721	no	-0.213537	0.721721	Plasma membrane calcium-transporting ATPase 1 (PMCA1) (EC 3.6.3.8) (Plasma membrane calcium ATPase isoform 1) (Plasma membrane calcium pump isoform 1)
G5E870	Trip12	TRIPC_MOUSE	G5E870_K1540	TB_24H-MOCK_24H	#NUM!		0	yes	4.93585	0.0361408	E3 ubiquitin-protein ligase TRIP12 (EC 2.3.2.26) (HECT-type E3 ubiquitin transferase TRIP12) (Thyroid receptor-interacting protein 12) (TR-interacting protein 12) (TRIP-12)
G5E870	Trip12	TRIPC_MOUSE	G5E870_K1071	TB_24H-MOCK_24H	-0.15354	0.742022	0.845596	no	-0.15354	0.845596	E3 ubiquitin-protein ligase TRIP12 (EC 2.3.2.26) (HECT-type E3 ubiquitin transferase TRIP12) (Thyroid receptor-interacting protein 12) (TR-interacting protein 12) (TRIP-12)
O08553	Dpysl2	DPYL2_MOUSE	O08553_K525	TB_24H-MOCK_24H	0.0392152	0.948716	0.967415	no	0.0392152	0.967415	Dihydropyrimidinase-related protein 2 (DRP-2) (Unc-33-like phosphoprotein 2) (ULIP-2)
O08585	Clta	CLCA_MOUSE	O08585_K229	TB_24H-MOCK_24H	-0.0650169	0.893681	0.936821	no	-0.0650169	0.936821	Clathrin light chain A (Lca)
O08638	Myh11	MYH11_MOUSE	Q8VDD5_K228,O08638_K235,Q61879_K235,Q6URW6_K259	TB_24H-MOCK_24H	-0.59366	0.493688	0.668936	no	-0.59366	0.668936	Myosin-11 (Myosin heavy chain 11) (Myosin heavy chain, smooth muscle isoform) (SMMHC)
O08638	Myh11	MYH11_MOUSE	Q8VDD5_K540,O08638_K547,Q6URW6_K570	TB_24H-MOCK_24H	0.415592	0.351954	0.538243	no	0.415592	0.538243	Myosin-11 (Myosin heavy chain 11) (Myosin heavy chain, smooth muscle isoform) (SMMHC)
O08638	Myh11	MYH11_MOUSE	Q8VDD5_K225,O08638_K232,Q6URW6_K256	TB_24H-MOCK_24H	1.10519	0.175145	0.344235	no	1.10519	0.344235	Myosin-11 (Myosin heavy chain 11) (Myosin heavy chain, smooth muscle isoform) (SMMHC)
O08709	Prdx6	PRDX6_MOUSE	O08709_K209	TB_24H-MOCK_24H	2.47346	9.91737e-08	3.09578e-06	no	2.47346	3.09578e-06	Peroxiredoxin-6 (EC 1.11.1.15) (1-Cys peroxiredoxin) (1-Cys PRX) (Acidic calcium-independent phospholipase A2) (aiPLA2) (EC 3.1.1.-) (Antioxidant protein 2) (Non-selenium glutathione peroxidase) (NSGPx) (EC 1.11.1.9)
O08788	Dctn1	DCTN1_MOUSE	O08788_K1120	TB_24H-MOCK_24H	2.85092	0.000430963	0.00326711	no	2.85092	0.00326711	Dynactin subunit 1 (150 kDa dynein-associated polypeptide) (DAP-150) (DP-150) (p150-glued)
O08992	Sdcbp	SDCB1_MOUSE	O08992_K224	TB_24H-MOCK_24H	#NUM!		0	yes	4.56465	0.0143068	Syntenin-1 (Scaffold protein Pbp1) (Syndecan-binding protein 1)
O08992	Sdcbp	SDCB1_MOUSE	O08992_K186	TB_24H-MOCK_24H	1.94889	2.68139e-06	4.59008e-05	no	1.94889	4.59008e-05	Syntenin-1 (Scaffold protein Pbp1) (Syndecan-binding protein 1)
O08992	Sdcbp	SDCB1_MOUSE	O08992_K180	TB_24H-MOCK_24H	0.796714	0.13927	0.293278	no	0.796714	0.293278	Syntenin-1 (Scaffold protein Pbp1) (Syndecan-binding protein 1)
O09044	Snap23	SNP23_MOUSE	O09044_K140	TB_24H-MOCK_24H	-0.538138	0.330986	0.519654	no	-0.538138	0.519654	Synaptosomal-associated protein 23 (SNAP-23) (Syndet) (Vesicle-membrane fusion protein SNAP-23)
O09106	Hdac1	HDAC1_MOUSE	O09106_K89,P70288_K90	TB_24H-MOCK_24H	0.18391	0.697291	0.813735	no	0.18391	0.813735	Histone deacetylase 1 (HD1) (EC 3.5.1.98)
O35226	Psmd4	PSMD4_MOUSE	O35226_K83	TB_24H-MOCK_24H	0.135468	0.634781	0.770612	no	0.135468	0.770612	26S proteasome non-ATPase regulatory subunit 4 (26S proteasome regulatory subunit RPN10) (26S proteasome regulatory subunit S5A) (Multiubiquitin chain-binding protein)
O35226	Psmd4	PSMD4_MOUSE	O35226_K74	TB_24H-MOCK_24H	-0.305321	0.495161	0.668936	no	-0.305321	0.668936	26S proteasome non-ATPase regulatory subunit 4 (26S proteasome regulatory subunit RPN10) (26S proteasome regulatory subunit S5A) (Multiubiquitin chain-binding protein)
O35226	Psmd4	PSMD4_MOUSE	O35226_K40	TB_24H-MOCK_24H	-0.254351	0.578625	0.728179	no	-0.254351	0.728179	26S proteasome non-ATPase regulatory subunit 4 (26S proteasome regulatory subunit RPN10) (26S proteasome regulatory subunit S5A) (Multiubiquitin chain-binding protein)
O35295	Purb	PURB_MOUSE	O35295_K82	TB_24H-MOCK_24H	-0.377728	0.092829	0.21701	no	-0.377728	0.21701	Transcriptional activator protein Pur-beta (Purine-rich element-binding protein B) (Vascular actin single-stranded DNA-binding factor 2 p44 component)
O35309	Nmi	NMI_MOUSE	O35309_K9	TB_24H-MOCK_24H	1.85634	0.0192981	0.0678202	no	1.85634	0.0678202	N-myc-interactor (Nmi) (N-myc and STAT interactor)
O35309	Nmi	NMI_MOUSE	O35309_K230	TB_24H-MOCK_24H	2.88714	3.89356e-08	1.47584e-06	no	2.88714	1.47584e-06	N-myc-interactor (Nmi) (N-myc and STAT interactor)
O35379	Abcc1	MRP1_MOUSE	O35379_K637	TB_24H-MOCK_24H	1.3068	0.000407078	0.00311571	no	1.3068	0.00311571	Multidrug resistance-associated protein 1 (ATP-binding cassette sub-family C member 1) (Leukotriene C(4) transporter) (LTC4 transporter)
O35379	Abcc1	MRP1_MOUSE	O35379_K497	TB_24H-MOCK_24H	-0.172398	0.822084	0.895817	no	-0.172398	0.895817	Multidrug resistance-associated protein 1 (ATP-binding cassette sub-family C member 1) (Leukotriene C(4) transporter) (LTC4 transporter)
O35379	Abcc1	MRP1_MOUSE	O35379_K499	TB_24H-MOCK_24H	-2.20804	0.0568606	0.153427	no	-2.20804	0.153427	Multidrug resistance-associated protein 1 (ATP-binding cassette sub-family C member 1) (Leukotriene C(4) transporter) (LTC4 transporter)
O35459	Ech1	ECH1_MOUSE	O35459_K10	TB_24H-MOCK_24H	#NUM!		0	yes	5.63449	0.0245677	Delta(3,5)-Delta(2,4)-dienoyl-CoA isomerase, mitochondrial (EC 5.3.3.-)
O35459	Ech1	ECH1_MOUSE	O35459_K147	TB_24H-MOCK_24H	1.49073	0.00159558	0.00965841	no	1.49073	0.00965841	Delta(3,5)-Delta(2,4)-dienoyl-CoA isomerase, mitochondrial (EC 5.3.3.-)
O35459	Ech1	ECH1_MOUSE	O35459_K150	TB_24H-MOCK_24H	1.18074	0.00428269	0.0214404	no	1.18074	0.0214404	Delta(3,5)-Delta(2,4)-dienoyl-CoA isomerase, mitochondrial (EC 5.3.3.-)
O35609	Scamp3	SCAM3_MOUSE	O35609_K104	TB_24H-MOCK_24H	0.0547699	0.953298	0.969745	no	0.0547699	0.969745	Secretory carrier-associated membrane protein 3 (Secretory carrier membrane protein 3)
O35639	Anxa3	ANXA3_MOUSE	O35639_K263	TB_24H-MOCK_24H	-0.169868	0.659528	0.786021	no	-0.169868	0.786021	Annexin A3 (35-alpha calcimedin) (Annexin III) (Annexin-3) (Lipocortin III) (Placental anticoagulant protein III) (PAP-III)
O35864	Cops5	CSN5_MOUSE	O35864_K56	TB_24H-MOCK_24H	0.675257	0.10666	0.240144	no	0.675257	0.240144	COP9 signalosome complex subunit 5 (SGN5) (Signalosome subunit 5) (EC 3.4.-.-) (Jun activation domain-binding protein 1) (Kip1 C-terminus-interacting protein 2)
O35904	Pik3cd	PK3CD_MOUSE	O35904_K690	TB_24H-MOCK_24H	1.22865	7.54441e-12	1.20107e-09	no	1.22865	1.20107e-09	Phosphatidylinositol 4,5-bisphosphate 3-kinase catalytic subunit delta isoform (PI3-kinase subunit delta) (PI3K-delta) (PI3Kdelta) (PtdIns-3-kinase subunit delta) (EC 2.7.1.153) (Phosphatidylinositol 4,5-bisphosphate 3-kinase 110 kDa catalytic subunit delta) (PtdIns-3-kinase subunit p110-delta) (p110delta)
O35904	Pik3cd	PK3CD_MOUSE	O35904_K699	TB_24H-MOCK_24H	-0.555792	0.283732	0.471504	no	-0.555792	0.471504	Phosphatidylinositol 4,5-bisphosphate 3-kinase catalytic subunit delta isoform (PI3-kinase subunit delta) (PI3K-delta) (PI3Kdelta) (PtdIns-3-kinase subunit delta) (EC 2.7.1.153) (Phosphatidylinositol 4,5-bisphosphate 3-kinase 110 kDa catalytic subunit delta) (PtdIns-3-kinase subunit p110-delta) (p110delta)
O54965	Rnf13	RNF13_MOUSE	O54965_K273	TB_24H-MOCK_24H	-0.659271	0.245111	0.431459	no	-0.659271	0.431459	E3 ubiquitin-protein ligase RNF13 (EC 6.3.2.-) (RING finger protein 13)
O54965	Rnf13	RNF13_MOUSE	O54965_K284	TB_24H-MOCK_24H	-1.20054	0.245934	0.432148	no	-1.20054	0.432148	E3 ubiquitin-protein ligase RNF13 (EC 6.3.2.-) (RING finger protein 13)
O54965	Rnf13	RNF13_MOUSE	O54965_K275	TB_24H-MOCK_24H	-1.56124	0.000437859	0.00330365	no	-1.56124	0.00330365	E3 ubiquitin-protein ligase RNF13 (EC 6.3.2.-) (RING finger protein 13)
O55100	Syngr1	SNG1_MOUSE	O55100_K10	TB_24H-MOCK_24H	-0.878024	0.181261	0.352082	no	-0.878024	0.352082	Synaptogyrin-1
O55142	Rpl35a	RL35A_MOUSE	O55142_K95	TB_24H-MOCK_24H	0.0435219	0.883369	0.931957	no	0.0435219	0.931957	60S ribosomal protein L35a
O55143	Atp2a2	AT2A2_MOUSE	O55143_K628	TB_24H-MOCK_24H	-0.969886	0.106798	0.240144	no	-0.969886	0.240144	Sarcoplasmic/endoplasmic reticulum calcium ATPase 2 (SERCA2) (SR Ca(2+)-ATPase 2) (EC 3.6.3.8) (Calcium pump 2) (Calcium-transporting ATPase sarcoplasmic reticulum type, slow twitch skeletal muscle isoform) (Endoplasmic reticulum class 1/2 Ca(2+) ATPase)
O70133	Dhx9	DHX9_MOUSE	O70133_K148	TB_24H-MOCK_24H	0.644078	0.445213	0.62613	no	0.644078	0.62613	ATP-dependent RNA helicase A (RHA) (EC 3.6.4.13) (DEAH box protein 9) (mHEL-5) (Nuclear DNA helicase II) (NDH II)
O70133	Dhx9	DHX9_MOUSE	O70133_K859	TB_24H-MOCK_24H	0.686147	0.0343352	0.10697	no	0.686147	0.10697	ATP-dependent RNA helicase A (RHA) (EC 3.6.4.13) (DEAH box protein 9) (mHEL-5) (Nuclear DNA helicase II) (NDH II)
O70145	Ncf2	NCF2_MOUSE	O70145_K516	TB_24H-MOCK_24H	#NUM!		0	yes	1.925	0.0424348	Neutrophil cytosol factor 2 (NCF-2) (67 kDa neutrophil oxidase factor) (NADPH oxidase activator 2) (Neutrophil NADPH oxidase factor 2) (p67-phox)
O70145	Ncf2	NCF2_MOUSE	O70145_K507	TB_24H-MOCK_24H	1.60134	0.00219334	0.0126515	no	1.60134	0.0126515	Neutrophil cytosol factor 2 (NCF-2) (67 kDa neutrophil oxidase factor) (NADPH oxidase activator 2) (Neutrophil NADPH oxidase factor 2) (p67-phox)
O70161	Pip5k1c	PI51C_MOUSE	O70161_K345	TB_24H-MOCK_24H	0.910966	0.300298	0.487664	no	0.910966	0.487664	Phosphatidylinositol 4-phosphate 5-kinase type-1 gamma (PIP5K1-gamma) (PtdIns(4)P-5-kinase 1 gamma) (EC 2.7.1.68) (Phosphatidylinositol 4-phosphate 5-kinase type I gamma) (PIP5KIgamma)
O70194	Eif3d	EIF3D_MOUSE	O70194_K275	TB_24H-MOCK_24H	1.02459	0.00466414	0.02306	no	1.02459	0.02306	Eukaryotic translation initiation factor 3 subunit D (eIF3d) (Eukaryotic translation initiation factor 3 subunit 7) (eIF-3-zeta) (eIF3 p66)
O70250	Pgam2	PGAM2_MOUSE	Q9DBJ1_K100,O70250_K100	TB_24H-MOCK_24H	2.19316	1.96486e-05	0.000226671	no	2.19316	0.000226671	Phosphoglycerate mutase 2 (EC 5.4.2.11) (EC 5.4.2.4) (BPG-dependent PGAM 2) (Muscle-specific phosphoglycerate mutase) (Phosphoglycerate mutase isozyme M) (PGAM-M)
O70252	Hmox2	HMOX2_MOUSE	O70252_K167	TB_24H-MOCK_24H	1.72265	0.000154757	0.00136874	no	1.72265	0.00136874	Heme oxygenase 2 (HO-2) (EC 1.14.14.18)
O70252	Hmox2	HMOX2_MOUSE	O70252_K215	TB_24H-MOCK_24H	0.112022	0.824563	0.897883	no	0.112022	0.897883	Heme oxygenase 2 (HO-2) (EC 1.14.14.18)
O70252	Hmox2	HMOX2_MOUSE	O70252_K132	TB_24H-MOCK_24H	0.158242	0.13144	0.281007	no	0.158242	0.281007	Heme oxygenase 2 (HO-2) (EC 1.14.14.18)
O70252	Hmox2	HMOX2_MOUSE	O70252_K168	TB_24H-MOCK_24H	#NUM!		0	yes	6.44049	0.0393849	Heme oxygenase 2 (HO-2) (EC 1.14.14.18)
O70310	Nmt1	NMT1_MOUSE	O70310_K107	TB_24H-MOCK_24H	0.977209	0.052621	0.147416	no	0.977209	0.147416	Glycylpeptide N-tetradecanoyltransferase 1 (EC 2.3.1.97) (Myristoyl-CoA:protein N-myristoyltransferase 1) (NMT 1) (Type I N-myristoyltransferase) (Peptide N-myristoyltransferase 1)
O70310	Nmt1	NMT1_MOUSE	O70310_K114	TB_24H-MOCK_24H	1.55868	0.0231273	0.0786724	no	1.55868	0.0786724	Glycylpeptide N-tetradecanoyltransferase 1 (EC 2.3.1.97) (Myristoyl-CoA:protein N-myristoyltransferase 1) (NMT 1) (Type I N-myristoyltransferase) (Peptide N-myristoyltransferase 1)
O70439	Stx7	STX7_MOUSE	O70439_K24	TB_24H-MOCK_24H	-0.232238	0.597577	0.739769	no	-0.232238	0.739769	Syntaxin-7
O70439	Stx7	STX7_MOUSE	O70439_K106	TB_24H-MOCK_24H	0.0938228	0.892143	0.936821	no	0.0938228	0.936821	Syntaxin-7
O70456	Sfn	1433S_MOUSE	Q9CQV8_K124,P63101_K122,P68254_K122,P61982_K127,P68510_K127,O70456_K124	TB_24H-MOCK_24H	0.155383	0.716066	0.825556	no	0.155383	0.825556	14-3-3 protein sigma (Stratifin)
O70492	Snx3	SNX3_MOUSE	O70492_K63	TB_24H-MOCK_24H	1.21161	0.122522	0.264302	no	1.21161	0.264302	Sorting nexin-3 (SDP3 protein)
O70492	Snx3	SNX3_MOUSE	O70492_K61,O70493_K62	TB_24H-MOCK_24H	0.278578	0.390665	0.57801	no	0.278578	0.57801	Sorting nexin-3 (SDP3 protein)
O70492	Snx3	SNX3_MOUSE	O70492_K95	TB_24H-MOCK_24H	#NUM!		0	yes	6.18078	0.0252474	Sorting nexin-3 (SDP3 protein)
O70492	Snx3	SNX3_MOUSE	O70492_K54	TB_24H-MOCK_24H	0.29864	0.427025	0.610255	no	0.29864	0.610255	Sorting nexin-3 (SDP3 protein)
O70492	Snx3	SNX3_MOUSE	O70492_K61	TB_24H-MOCK_24H	0.515167	0.182863	0.354238	no	0.515167	0.354238	Sorting nexin-3 (SDP3 protein)
O88286	Wiz	WIZ_MOUSE	O88286_K1630	TB_24H-MOCK_24H	-0.280435	0.663448	0.786932	no	-0.280435	0.786932	Protein Wiz (Widely-interspaced zinc finger-containing protein)
O88342	Wdr1	WDR1_MOUSE	O88342_K81	TB_24H-MOCK_24H	1.71883	3.21445e-06	5.25594e-05	no	1.71883	5.25594e-05	WD repeat-containing protein 1 (Actin-interacting protein 1) (AIP1)
O88342	Wdr1	WDR1_MOUSE	O88342_K321	TB_24H-MOCK_24H	0.0210325	0.981251	0.988079	no	0.0210325	0.988079	WD repeat-containing protein 1 (Actin-interacting protein 1) (AIP1)
O88342	Wdr1	WDR1_MOUSE	O88342_K7	TB_24H-MOCK_24H	0.620027	0.187629	0.359332	no	0.620027	0.359332	WD repeat-containing protein 1 (Actin-interacting protein 1) (AIP1)
O88342	Wdr1	WDR1_MOUSE	O88342_K182	TB_24H-MOCK_24H	0.347389	0.42474	0.609712	no	0.347389	0.609712	WD repeat-containing protein 1 (Actin-interacting protein 1) (AIP1)
O88342	Wdr1	WDR1_MOUSE	O88342_K38	TB_24H-MOCK_24H	1.80378	0.00523347	0.0250954	no	1.80378	0.0250954	WD repeat-containing protein 1 (Actin-interacting protein 1) (AIP1)
O88522	Ikbkg	NEMO_MOUSE	O88522_K302	TB_24H-MOCK_24H	#NUM!		0	yes	4.91897	0.0285758	NF-kappa-B essential modulator (NEMO) (IkB kinase-associated protein 1) (IKKAP1) (mFIP-3) (Inhibitor of nuclear factor kappa-B kinase subunit gamma) (I-kappa-B kinase subunit gamma) (IKK-gamma) (IKKG) (IkB kinase subunit gamma) (NF-kappa-B essential modifier)
O88543	Cops3	CSN3_MOUSE	O88543_K281	TB_24H-MOCK_24H	-0.219936	0.700262	0.813735	no	-0.219936	0.813735	COP9 signalosome complex subunit 3 (SGN3) (Signalosome subunit 3) (JAB1-containing signalosome subunit 3)
O88569	Hnrnpa2b1	ROA2_MOUSE	O88569_K59	TB_24H-MOCK_24H	-0.287506	0.745563	0.847497	no	-0.287506	0.847497	Heterogeneous nuclear ribonucleoproteins A2/B1 (hnRNP A2/B1)
O88685	Psmc3	PRS6A_MOUSE	O88685_K248	TB_24H-MOCK_24H	-0.224279	0.732154	0.837849	no	-0.224279	0.837849	26S protease regulatory subunit 6A (26S proteasome AAA-ATPase subunit RPT5) (Proteasome 26S subunit ATPase 3) (Tat-binding protein 1) (TBP-1)
O88685	Psmc3	PRS6A_MOUSE	O88685_K128	TB_24H-MOCK_24H	0.323794	0.0949172	0.220596	no	0.323794	0.220596	26S protease regulatory subunit 6A (26S proteasome AAA-ATPase subunit RPT5) (Proteasome 26S subunit ATPase 3) (Tat-binding protein 1) (TBP-1)
O88685	Psmc3	PRS6A_MOUSE	O88685_K281	TB_24H-MOCK_24H	-0.626431	0.210556	0.387521	no	-0.626431	0.387521	26S protease regulatory subunit 6A (26S proteasome AAA-ATPase subunit RPT5) (Proteasome 26S subunit ATPase 3) (Tat-binding protein 1) (TBP-1)
O88685	Psmc3	PRS6A_MOUSE	O88685_K59	TB_24H-MOCK_24H	0.440439	0.533929	0.693324	no	0.440439	0.693324	26S protease regulatory subunit 6A (26S proteasome AAA-ATPase subunit RPT5) (Proteasome 26S subunit ATPase 3) (Tat-binding protein 1) (TBP-1)
O88685	Psmc3	PRS6A_MOUSE	O88685_K123	TB_24H-MOCK_24H	0.167561	0.705999	0.816824	no	0.167561	0.816824	26S protease regulatory subunit 6A (26S proteasome AAA-ATPase subunit RPT5) (Proteasome 26S subunit ATPase 3) (Tat-binding protein 1) (TBP-1)
O88685	Psmc3	PRS6A_MOUSE	O88685_K279	TB_24H-MOCK_24H	-0.259364	0.855206	0.916209	no	-0.259364	0.916209	26S protease regulatory subunit 6A (26S proteasome AAA-ATPase subunit RPT5) (Proteasome 26S subunit ATPase 3) (Tat-binding protein 1) (TBP-1)
O88712	Ctbp1	CTBP1_MOUSE	O88712_K280,P56546_K286	TB_24H-MOCK_24H	-0.586454	0.0628144	0.16529	no	-0.586454	0.16529	C-terminal-binding protein 1 (CtBP1) (EC 1.1.1.-)
O88738	Birc6	BIRC6_MOUSE	O88738_K2293	TB_24H-MOCK_24H	-0.597747	0.0557527	0.152155	no	-0.597747	0.152155	Baculoviral IAP repeat-containing protein 6 (EC 2.3.2.27) (BIR repeat-containing ubiquitin-conjugating enzyme) (BRUCE) (RING-type E3 ubiquitin transferase BIRC6) (Ubiquitin-conjugating BIR domain enzyme apollon) (APOLLON)
O88738	Birc6	BIRC6_MOUSE	O88738_K2269	TB_24H-MOCK_24H	-0.224535	0.543965	0.702858	no	-0.224535	0.702858	Baculoviral IAP repeat-containing protein 6 (EC 2.3.2.27) (BIR repeat-containing ubiquitin-conjugating enzyme) (BRUCE) (RING-type E3 ubiquitin transferase BIRC6) (Ubiquitin-conjugating BIR domain enzyme apollon) (APOLLON)
O88738	Birc6	BIRC6_MOUSE	O88738_K3169	TB_24H-MOCK_24H	-0.736002	0.0191449	0.0677548	no	-0.736002	0.0677548	Baculoviral IAP repeat-containing protein 6 (EC 2.3.2.27) (BIR repeat-containing ubiquitin-conjugating enzyme) (BRUCE) (RING-type E3 ubiquitin transferase BIRC6) (Ubiquitin-conjugating BIR domain enzyme apollon) (APOLLON)
O88811	Stam2	STAM2_MOUSE	O88811_K202	TB_24H-MOCK_24H	0.729761	0.304844	0.493704	no	0.729761	0.493704	Signal transducing adapter molecule 2 (STAM-2) (Hrs-binding protein)
O88844	Idh1	IDHC_MOUSE	O88844_K236	TB_24H-MOCK_24H	-0.89136	0.27331	0.460981	no	-0.89136	0.460981	Isocitrate dehydrogenase [NADP] cytoplasmic (IDH) (EC 1.1.1.42) (Cytosolic NADP-isocitrate dehydrogenase) (IDP) (NADP(+)-specific ICDH) (Oxalosuccinate decarboxylase)
O88844	Idh1	IDHC_MOUSE	O88844_K58	TB_24H-MOCK_24H	-0.388625	0.373395	0.560976	no	-0.388625	0.560976	Isocitrate dehydrogenase [NADP] cytoplasmic (IDH) (EC 1.1.1.42) (Cytosolic NADP-isocitrate dehydrogenase) (IDP) (NADP(+)-specific ICDH) (Oxalosuccinate decarboxylase)
O88844	Idh1	IDHC_MOUSE	O88844_K126	TB_24H-MOCK_24H	-0.214482	0.555479	0.712102	no	-0.214482	0.712102	Isocitrate dehydrogenase [NADP] cytoplasmic (IDH) (EC 1.1.1.42) (Cytosolic NADP-isocitrate dehydrogenase) (IDP) (NADP(+)-specific ICDH) (Oxalosuccinate decarboxylase)
O88844	Idh1	IDHC_MOUSE	O88844_K381	TB_24H-MOCK_24H	#NUM!		0	yes	2.38499	0.0453839	Isocitrate dehydrogenase [NADP] cytoplasmic (IDH) (EC 1.1.1.42) (Cytosolic NADP-isocitrate dehydrogenase) (IDP) (NADP(+)-specific ICDH) (Oxalosuccinate decarboxylase)
O88958	Gnpda1	GNPI1_MOUSE	O88958_K160	TB_24H-MOCK_24H	0.253983	0.530196	0.691862	no	0.253983	0.691862	Glucosamine-6-phosphate isomerase 1 (EC 3.5.99.6) (Glucosamine-6-phosphate deaminase 1) (GNPDA 1) (GlcN6P deaminase 1) (Oscillin)
O88958	Gnpda1	GNPI1_MOUSE	O88958_K256	TB_24H-MOCK_24H	0.129651	0.811847	0.890124	no	0.129651	0.890124	Glucosamine-6-phosphate isomerase 1 (EC 3.5.99.6) (Glucosamine-6-phosphate deaminase 1) (GNPDA 1) (GlcN6P deaminase 1) (Oscillin)
O88990	Actn3	ACTN3_MOUSE	P57780_K123,Q7TPR4_K103,O88990_K116	TB_24H-MOCK_24H	1.14753	0.0503557	0.142645	no	1.14753	0.142645	Alpha-actinin-3 (Alpha-actinin skeletal muscle isoform 3) (F-actin cross-linking protein)
O88990	Actn3	ACTN3_MOUSE	P57780_K126,Q7TPR4_K106,O88990_K119	TB_24H-MOCK_24H	-0.56362	0.527386	0.688761	no	-0.56362	0.688761	Alpha-actinin-3 (Alpha-actinin skeletal muscle isoform 3) (F-actin cross-linking protein)
O89051	Itm2b	ITM2B_MOUSE	O89051_K13	TB_24H-MOCK_24H	-0.703394	0.324255	0.514157	no	-0.703394	0.514157	Integral membrane protein 2B (Immature BRI2) (imBRI2) (Protein E25B) (Transmembrane protein BRI) (Bri) [Cleaved into: BRI2, membrane form (Mature BRI2) (mBRI2); BRI2 intracellular domain (BRI2 ICD); BRI2C, soluble form; Bri23 peptide (Bri2-23) (ABri23) (C-terminal peptide) (P23 peptide)]
O89051	Itm2b	ITM2B_MOUSE	O89051_K3	TB_24H-MOCK_24H	-0.541915	0.0882364	0.209348	no	-0.541915	0.209348	Integral membrane protein 2B (Immature BRI2) (imBRI2) (Protein E25B) (Transmembrane protein BRI) (Bri) [Cleaved into: BRI2, membrane form (Mature BRI2) (mBRI2); BRI2 intracellular domain (BRI2 ICD); BRI2C, soluble form; Bri23 peptide (Bri2-23) (ABri23) (C-terminal peptide) (P23 peptide)]
O89053	Coro1a	COR1A_MOUSE	Q9WUM3_K339,O89053_K339	TB_24H-MOCK_24H	#NUM!		0	yes	-2.31937	0.0205174	Coronin-1A (Coronin-like protein A) (Clipin-A) (Coronin-like protein p57) (Tryptophan aspartate-containing coat protein) (TACO)
P01896	P01896	HA1Z_MOUSE	P01899_K340,P01897_K340,P01896_K150	TB_24H-MOCK_24H	-0.323785	0.643961	0.775675	no	-0.323785	0.775675	H-2 class I histocompatibility antigen, alpha chain (Clone PH-2D-2) (Fragment)
P01897	H2-L	HA1L_MOUSE	P01899_K361,P01897_K361	TB_24H-MOCK_24H	1.62301	0.0170999	0.0621411	no	1.62301	0.0621411	H-2 class I histocompatibility antigen, L-D alpha chain
P01901	H2-K1	HA1B_MOUSE	P14428_K297,P03991_K337,P04223_K338,P01901_K338	TB_24H-MOCK_24H	0.553668	0.595876	0.738237	no	0.553668	0.738237	H-2 class I histocompatibility antigen, K-B alpha chain (H-2K(B))
P02301	H3f3c	H3C_MOUSE	P84244_K37,P02301_K37	TB_24H-MOCK_24H	-0.476549	0.335771	0.523553	no	-0.476549	0.523553	Histone H3.3C (Embryonic)
P02301	H3f3c	H3C_MOUSE	P84228_K80,P68433_K80,P84244_K80,P02301_K80	TB_24H-MOCK_24H	-0.42959	0.486223	0.663297	no	-0.42959	0.663297	Histone H3.3C (Embryonic)
P02301	H3f3c	H3C_MOUSE	P84244_K38,P02301_K38	TB_24H-MOCK_24H	-0.300571	0.711195	0.821642	no	-0.300571	0.821642	Histone H3.3C (Embryonic)
P02301	H3f3c	H3C_MOUSE	P84244_K28,P02301_K28	TB_24H-MOCK_24H	-0.297715	0.609584	0.749858	no	-0.297715	0.749858	Histone H3.3C (Embryonic)
P02301	H3f3c	H3C_MOUSE	P84228_K123,P68433_K123,P84244_K123,P02301_K123	TB_24H-MOCK_24H	0.0709421	0.927308	0.954899	no	0.0709421	0.954899	Histone H3.3C (Embryonic)
P02301	H3f3c	H3C_MOUSE	P84228_K15,P68433_K15,P84244_K15,P02301_K15	TB_24H-MOCK_24H	-3.44602	0.0104297	0.0433528	no	-3.44602	0.0433528	Histone H3.3C (Embryonic)
P02301	H3f3c	H3C_MOUSE	P84228_K57,P68433_K57,P84244_K57,P02301_K57	TB_24H-MOCK_24H	-1.7182	0.00013568	0.00122729	no	-1.7182	0.00122729	Histone H3.3C (Embryonic)
P05063	Aldoc	ALDOC_MOUSE	P05064_K140,P05063_K140	TB_24H-MOCK_24H	0.714981	0.23325	0.416762	no	0.714981	0.416762	Fructose-bisphosphate aldolase C (EC 4.1.2.13) (Aldolase 3) (Brain-type aldolase) (Scrapie-responsive protein 2) (Zebrin II)
P05063	Aldoc	ALDOC_MOUSE	P05064_K208,P05063_K208	TB_24H-MOCK_24H	#NUM!		0	yes	6.42143	0.0127616	Fructose-bisphosphate aldolase C (EC 4.1.2.13) (Aldolase 3) (Brain-type aldolase) (Scrapie-responsive protein 2) (Zebrin II)
P05063	Aldoc	ALDOC_MOUSE	P05064_K200,P05063_K200	TB_24H-MOCK_24H	1.86155	0.0083355	0.0358652	no	1.86155	0.0358652	Fructose-bisphosphate aldolase C (EC 4.1.2.13) (Aldolase 3) (Brain-type aldolase) (Scrapie-responsive protein 2) (Zebrin II)
P05063	Aldoc	ALDOC_MOUSE	P05064_K215,P05063_K215	TB_24H-MOCK_24H	1.64062	0.00569448	0.0264148	no	1.64062	0.0264148	Fructose-bisphosphate aldolase C (EC 4.1.2.13) (Aldolase 3) (Brain-type aldolase) (Scrapie-responsive protein 2) (Zebrin II)
P05064	Aldoa	ALDOA_MOUSE	P05064_K330	TB_24H-MOCK_24H	0.177589	0.730435	0.836669	no	0.177589	0.836669	Fructose-bisphosphate aldolase A (EC 4.1.2.13) (Aldolase 1) (Muscle-type aldolase)
P05064	Aldoa	ALDOA_MOUSE	P05064_K28	TB_24H-MOCK_24H	2.64191	0.00329682	0.0177405	no	2.64191	0.0177405	Fructose-bisphosphate aldolase A (EC 4.1.2.13) (Aldolase 1) (Muscle-type aldolase)
P05064	Aldoa	ALDOA_MOUSE	P05064_K108	TB_24H-MOCK_24H	2.13707	6.16425e-05	0.000613343	no	2.13707	0.000613343	Fructose-bisphosphate aldolase A (EC 4.1.2.13) (Aldolase 1) (Muscle-type aldolase)
P05064	Aldoa	ALDOA_MOUSE	P05064_K13	TB_24H-MOCK_24H	1.40248	0.0244768	0.0816921	no	1.40248	0.0816921	Fructose-bisphosphate aldolase A (EC 4.1.2.13) (Aldolase 1) (Muscle-type aldolase)
P05064	Aldoa	ALDOA_MOUSE	P05064_K42	TB_24H-MOCK_24H	1.97728	0.0010489	0.00681573	no	1.97728	0.00681573	Fructose-bisphosphate aldolase A (EC 4.1.2.13) (Aldolase 1) (Muscle-type aldolase)
P05064	Aldoa	ALDOA_MOUSE	P05064_K317	TB_24H-MOCK_24H	0.0176112	0.978075	0.986554	no	0.0176112	0.986554	Fructose-bisphosphate aldolase A (EC 4.1.2.13) (Aldolase 1) (Muscle-type aldolase)
P05064	Aldoa	ALDOA_MOUSE	P05064_K312	TB_24H-MOCK_24H	1.06981	0.0731738	0.18202	no	1.06981	0.18202	Fructose-bisphosphate aldolase A (EC 4.1.2.13) (Aldolase 1) (Muscle-type aldolase)
P05064	Aldoa	ALDOA_MOUSE	P05064_K153	TB_24H-MOCK_24H	1.54346	0.0691445	0.17669	no	1.54346	0.17669	Fructose-bisphosphate aldolase A (EC 4.1.2.13) (Aldolase 1) (Muscle-type aldolase)
P05064	Aldoa	ALDOA_MOUSE	P05064_K99	TB_24H-MOCK_24H	2.94877	1.17354e-08	4.67068e-07	no	2.94877	4.67068e-07	Fructose-bisphosphate aldolase A (EC 4.1.2.13) (Aldolase 1) (Muscle-type aldolase)
P05064	Aldoa	ALDOA_MOUSE	P05064_K101	TB_24H-MOCK_24H	1.38824	0.0615177	0.162685	no	1.38824	0.162685	Fructose-bisphosphate aldolase A (EC 4.1.2.13) (Aldolase 1) (Muscle-type aldolase)
P05064	Aldoa	ALDOA_MOUSE	P05064_K111	TB_24H-MOCK_24H	2.489	2.22426e-06	4.02388e-05	no	2.489	4.02388e-05	Fructose-bisphosphate aldolase A (EC 4.1.2.13) (Aldolase 1) (Muscle-type aldolase)
P05064	Aldoa	ALDOA_MOUSE	P05064_K322	TB_24H-MOCK_24H	-0.00523994	0.986949	0.991308	no	-0.00523994	0.991308	Fructose-bisphosphate aldolase A (EC 4.1.2.13) (Aldolase 1) (Muscle-type aldolase)
P05064	Aldoa	ALDOA_MOUSE	P05064_K14	TB_24H-MOCK_24H	2.3744	5.87615e-07	1.39624e-05	no	2.3744	1.39624e-05	Fructose-bisphosphate aldolase A (EC 4.1.2.13) (Aldolase 1) (Muscle-type aldolase)
P05064	Aldoa	ALDOA_MOUSE	P05064_K342	TB_24H-MOCK_24H	#NUM!		0	yes	6.27145	0.0297534	Fructose-bisphosphate aldolase A (EC 4.1.2.13) (Aldolase 1) (Muscle-type aldolase)
P05132	Prkaca	KAPCA_MOUSE	P05132_K280	TB_24H-MOCK_24H	0.0359337	0.922967	0.952895	no	0.0359337	0.952895	cAMP-dependent protein kinase catalytic subunit alpha (PKA C-alpha) (EC 2.7.11.11)
P05132	Prkaca	KAPCA_MOUSE	P05132_K93	TB_24H-MOCK_24H	0.660864	0.0101953	0.0424894	no	0.660864	0.0424894	cAMP-dependent protein kinase catalytic subunit alpha (PKA C-alpha) (EC 2.7.11.11)
P05132	Prkaca	KAPCA_MOUSE	P05132_K48	TB_24H-MOCK_24H	0.484632	0.228638	0.411291	no	0.484632	0.411291	cAMP-dependent protein kinase catalytic subunit alpha (PKA C-alpha) (EC 2.7.11.11)
P05213	Tuba1b	TBA1B_MOUSE	P05213_K336,P68373_K336,P68369_K336,P05214_K336	TB_24H-MOCK_24H	0.505419	0.0780229	0.190731	no	0.505419	0.190731	Tubulin alpha-1B chain (Alpha-tubulin 2) (Alpha-tubulin isotype M-alpha-2) (Tubulin alpha-2 chain) [Cleaved into: Detyrosinated tubulin alpha-1B chain]
P05213	Tuba1b	TBA1B_MOUSE	P05213_K370,P68368_K370,P68373_K370,P68369_K370,P05214_K370,Q9JJZ2_K370	TB_24H-MOCK_24H	-0.0412918	0.901529	0.94052	no	-0.0412918	0.94052	Tubulin alpha-1B chain (Alpha-tubulin 2) (Alpha-tubulin isotype M-alpha-2) (Tubulin alpha-2 chain) [Cleaved into: Detyrosinated tubulin alpha-1B chain]
P06151	Ldha	LDHA_MOUSE	P06151_K90	TB_24H-MOCK_24H	0.165194	0.767016	0.860391	no	0.165194	0.860391	L-lactate dehydrogenase A chain (LDH-A) (EC 1.1.1.27) (LDH muscle subunit) (LDH-M)
P06151	Ldha	LDHA_MOUSE	P06151_K81	TB_24H-MOCK_24H	0.299625	0.254392	0.441167	no	0.299625	0.441167	L-lactate dehydrogenase A chain (LDH-A) (EC 1.1.1.27) (LDH muscle subunit) (LDH-M)
P06151	Ldha	LDHA_MOUSE	P06151_K126	TB_24H-MOCK_24H	0.954892	0.00385578	0.0199299	no	0.954892	0.0199299	L-lactate dehydrogenase A chain (LDH-A) (EC 1.1.1.27) (LDH muscle subunit) (LDH-M)
P06151	Ldha	LDHA_MOUSE	P06151_K76	TB_24H-MOCK_24H	0.106567	0.827781	0.899142	no	0.106567	0.899142	L-lactate dehydrogenase A chain (LDH-A) (EC 1.1.1.27) (LDH muscle subunit) (LDH-M)
P06151	Ldha	LDHA_MOUSE	P06151_K155	TB_24H-MOCK_24H	-2.07246	0.015228	0.0571767	no	-2.07246	0.0571767	L-lactate dehydrogenase A chain (LDH-A) (EC 1.1.1.27) (LDH muscle subunit) (LDH-M)
P06745	Gpi	G6PI_MOUSE	P06745_K112	TB_24H-MOCK_24H	#NUM!		0	yes	4.45466	0.0291025	Glucose-6-phosphate isomerase (GPI) (EC 5.3.1.9) (Autocrine motility factor) (AMF) (Neuroleukin) (NLK) (Phosphoglucose isomerase) (PGI) (Phosphohexose isomerase) (PHI)
P06745	Gpi	G6PI_MOUSE	P06745_K130	TB_24H-MOCK_24H	1.47317	0.0396713	0.118159	no	1.47317	0.118159	Glucose-6-phosphate isomerase (GPI) (EC 5.3.1.9) (Autocrine motility factor) (AMF) (Neuroleukin) (NLK) (Phosphoglucose isomerase) (PGI) (Phosphohexose isomerase) (PHI)
P06745	Gpi	G6PI_MOUSE	P06745_K25	TB_24H-MOCK_24H	1.4987	0.000228061	0.00188272	no	1.4987	0.00188272	Glucose-6-phosphate isomerase (GPI) (EC 5.3.1.9) (Autocrine motility factor) (AMF) (Neuroleukin) (NLK) (Phosphoglucose isomerase) (PGI) (Phosphohexose isomerase) (PHI)
P06745	Gpi	G6PI_MOUSE	P06745_K89	TB_24H-MOCK_24H	1.5603	0.001482	0.00911375	no	1.5603	0.00911375	Glucose-6-phosphate isomerase (GPI) (EC 5.3.1.9) (Autocrine motility factor) (AMF) (Neuroleukin) (NLK) (Phosphoglucose isomerase) (PGI) (Phosphohexose isomerase) (PHI)
P06795	Abcb1b	MDR1B_MOUSE	P06795_K883	TB_24H-MOCK_24H	-0.656944	0.319279	0.507784	no	-0.656944	0.507784	Multidrug resistance protein 1B (EC 3.6.3.44) (ATP-binding cassette sub-family B member 1B) (P-glycoprotein 1) (CD antigen CD243)
P06795	Abcb1b	MDR1B_MOUSE	P06795_K417,P21447_K414,P21440_K417	TB_24H-MOCK_24H	-0.378598	0.137263	0.291343	no	-0.378598	0.291343	Multidrug resistance protein 1B (EC 3.6.3.44) (ATP-binding cassette sub-family B member 1B) (P-glycoprotein 1) (CD antigen CD243)
P06800	Ptprc	PTPRC_MOUSE	P06800_K774	TB_24H-MOCK_24H	-0.315636	0.576737	0.726972	no	-0.315636	0.726972	Receptor-type tyrosine-protein phosphatase C (EC 3.1.3.48) (Leukocyte common antigen) (L-CA) (Lymphocyte antigen 5) (Ly-5) (T200) (CD antigen CD45)
P06800	Ptprc	PTPRC_MOUSE	P06800_K653	TB_24H-MOCK_24H	1.36149	0.0310109	0.0981498	no	1.36149	0.0981498	Receptor-type tyrosine-protein phosphatase C (EC 3.1.3.48) (Leukocyte common antigen) (L-CA) (Lymphocyte antigen 5) (Ly-5) (T200) (CD antigen CD45)
P07356	Anxa2	ANXA2_MOUSE	P07356_K115	TB_24H-MOCK_24H	1.91885	7.28909e-06	0.000100036	no	1.91885	0.000100036	Annexin A2 (Annexin II) (Annexin-2) (Calpactin I heavy chain) (Calpactin-1 heavy chain) (Chromobindin-8) (Lipocortin II) (Placental anticoagulant protein IV) (PAP-IV) (Protein I) (p36)
P07356	Anxa2	ANXA2_MOUSE	P07356_K176	TB_24H-MOCK_24H	0.424324	0.493883	0.668936	no	0.424324	0.668936	Annexin A2 (Annexin II) (Annexin-2) (Calpactin I heavy chain) (Calpactin-1 heavy chain) (Chromobindin-8) (Lipocortin II) (Placental anticoagulant protein IV) (PAP-IV) (Protein I) (p36)
P07901	Hsp90aa1	HS90A_MOUSE	P07901_K447	TB_24H-MOCK_24H	0.467301	0.293457	0.480866	no	0.467301	0.480866	Heat shock protein HSP 90-alpha (Heat shock 86 kDa) (HSP 86) (HSP86) (Tumor-specific transplantation 86 kDa antigen) (TSTA)
P07901	Hsp90aa1	HS90A_MOUSE	P07901_K432	TB_24H-MOCK_24H	#NUM!		0	yes	5.03078	0.0199109	Heat shock protein HSP 90-alpha (Heat shock 86 kDa) (HSP 86) (HSP86) (Tumor-specific transplantation 86 kDa antigen) (TSTA)
P07901	Hsp90aa1	HS90A_MOUSE	P07901_K116,P11499_K111	TB_24H-MOCK_24H	1.03499	0.300501	0.487664	no	1.03499	0.487664	Heat shock protein HSP 90-alpha (Heat shock 86 kDa) (HSP 86) (HSP86) (Tumor-specific transplantation 86 kDa antigen) (TSTA)
P07901	Hsp90aa1	HS90A_MOUSE	P07901_K444	TB_24H-MOCK_24H	2.04572	4.12859e-06	6.31992e-05	no	2.04572	6.31992e-05	Heat shock protein HSP 90-alpha (Heat shock 86 kDa) (HSP 86) (HSP86) (Tumor-specific transplantation 86 kDa antigen) (TSTA)
P07901	Hsp90aa1	HS90A_MOUSE	P07901_K632	TB_24H-MOCK_24H	#NUM!		0	yes	2.64253	0.0157774	Heat shock protein HSP 90-alpha (Heat shock 86 kDa) (HSP 86) (HSP86) (Tumor-specific transplantation 86 kDa antigen) (TSTA)
P07901	Hsp90aa1	HS90A_MOUSE	P07901_K112,P11499_K107	TB_24H-MOCK_24H	1.78756	0.0014255	0.00884977	no	1.78756	0.00884977	Heat shock protein HSP 90-alpha (Heat shock 86 kDa) (HSP 86) (HSP86) (Tumor-specific transplantation 86 kDa antigen) (TSTA)
P07901	Hsp90aa1	HS90A_MOUSE	P07901_K408,P11499_K399	TB_24H-MOCK_24H	0.451337	0.109748	0.242507	no	0.451337	0.242507	Heat shock protein HSP 90-alpha (Heat shock 86 kDa) (HSP 86) (HSP86) (Tumor-specific transplantation 86 kDa antigen) (TSTA)
P07901	Hsp90aa1	HS90A_MOUSE	P07901_K616,P11499_K607	TB_24H-MOCK_24H	1.29723	4.9057e-11	4.59404e-09	no	1.29723	4.59404e-09	Heat shock protein HSP 90-alpha (Heat shock 86 kDa) (HSP 86) (HSP86) (Tumor-specific transplantation 86 kDa antigen) (TSTA)
P08103	Hck	HCK_MOUSE	P08103_K175	TB_24H-MOCK_24H	#NUM!		0	yes	2.49161	0.0165713	Tyrosine-protein kinase HCK (EC 2.7.10.2) (B-cell/myeloid kinase) (BMK) (Hematopoietic cell kinase) (Hemopoietic cell kinase) (p56-HCK/p59-HCK)
P08103	Hck	HCK_MOUSE	P08103_K38	TB_24H-MOCK_24H	1.38015	0.0129093	0.0509965	no	1.38015	0.0509965	Tyrosine-protein kinase HCK (EC 2.7.10.2) (B-cell/myeloid kinase) (BMK) (Hematopoietic cell kinase) (Hemopoietic cell kinase) (p56-HCK/p59-HCK)
P08226	Apoe	APOE_MOUSE	P08226_K173	TB_24H-MOCK_24H	-0.749551	0.00199014	0.0116055	no	-0.749551	0.0116055	Apolipoprotein E (Apo-E)
P08226	Apoe	APOE_MOUSE	P08226_K252	TB_24H-MOCK_24H	1.53879	0.094269	0.21941	no	1.53879	0.21941	Apolipoprotein E (Apo-E)
P08226	Apoe	APOE_MOUSE	P08226_K105	TB_24H-MOCK_24H	-0.572381	0.238743	0.42467	no	-0.572381	0.42467	Apolipoprotein E (Apo-E)
P08556	Nras	RASN_MOUSE	P08556_K128	TB_24H-MOCK_24H	-0.0500357	0.921746	0.95287	no	-0.0500357	0.95287	GTPase NRas (Transforming protein N-Ras)
P09041	Pgk2	PGK2_MOUSE	P09411_K30,P09041_K30	TB_24H-MOCK_24H	0.832272	0.0377193	0.113945	no	0.832272	0.113945	Phosphoglycerate kinase 2 (EC 2.7.2.3) (Phosphoglycerate kinase, testis specific)
P09055	Itgb1	ITB1_MOUSE	P09055_K784	TB_24H-MOCK_24H	-0.20405	0.444816	0.626124	no	-0.20405	0.626124	Integrin beta-1 (Fibronectin receptor subunit beta) (VLA-4 subunit beta) (CD antigen CD29)
P09103	P4hb	PDIA1_MOUSE	P09103_K311	TB_24H-MOCK_24H	-0.661943	0.166381	0.331633	no	-0.661943	0.331633	Protein disulfide-isomerase (PDI) (EC 5.3.4.1) (Cellular thyroid hormone-binding protein) (Endoplasmic reticulum resident protein 59) (ER protein 59) (ERp59) (Prolyl 4-hydroxylase subunit beta) (p55)
P09103	P4hb	PDIA1_MOUSE	P09103_K67	TB_24H-MOCK_24H	-0.591551	0.628376	0.765398	no	-0.591551	0.765398	Protein disulfide-isomerase (PDI) (EC 5.3.4.1) (Cellular thyroid hormone-binding protein) (Endoplasmic reticulum resident protein 59) (ER protein 59) (ERp59) (Prolyl 4-hydroxylase subunit beta) (p55)
P09103	P4hb	PDIA1_MOUSE	P09103_K310	TB_24H-MOCK_24H	-0.520592	0.198929	0.373901	no	-0.520592	0.373901	Protein disulfide-isomerase (PDI) (EC 5.3.4.1) (Cellular thyroid hormone-binding protein) (Endoplasmic reticulum resident protein 59) (ER protein 59) (ERp59) (Prolyl 4-hydroxylase subunit beta) (p55)
P09411	Pgk1	PGK1_MOUSE	P09411_K6	TB_24H-MOCK_24H	0.869932	0.145419	0.302229	no	0.869932	0.302229	Phosphoglycerate kinase 1 (EC 2.7.2.3)
P09411	Pgk1	PGK1_MOUSE	P09411_K17	TB_24H-MOCK_24H	-0.857444	0.25718	0.444551	no	-0.857444	0.444551	Phosphoglycerate kinase 1 (EC 2.7.2.3)
P09411	Pgk1	PGK1_MOUSE	P09411_K192	TB_24H-MOCK_24H	1.15419	0.0336354	0.105201	no	1.15419	0.105201	Phosphoglycerate kinase 1 (EC 2.7.2.3)
P09411	Pgk1	PGK1_MOUSE	P09411_K191	TB_24H-MOCK_24H	1.46532	0.0288502	0.0927868	no	1.46532	0.0927868	Phosphoglycerate kinase 1 (EC 2.7.2.3)
P09411	Pgk1	PGK1_MOUSE	P09411_K353	TB_24H-MOCK_24H	2.23489	3.23544e-06	5.25594e-05	no	2.23489	5.25594e-05	Phosphoglycerate kinase 1 (EC 2.7.2.3)
P09411	Pgk1	PGK1_MOUSE	P09411_K361	TB_24H-MOCK_24H	-0.593152	0.0526883	0.147416	no	-0.593152	0.147416	Phosphoglycerate kinase 1 (EC 2.7.2.3)
P09411	Pgk1	PGK1_MOUSE	P09411_K323	TB_24H-MOCK_24H	1.03524	0.0292073	0.0937462	no	1.03524	0.0937462	Phosphoglycerate kinase 1 (EC 2.7.2.3)
P09411	Pgk1	PGK1_MOUSE	P09411_K48	TB_24H-MOCK_24H	-0.330759	0.465269	0.645779	no	-0.330759	0.645779	Phosphoglycerate kinase 1 (EC 2.7.2.3)
P09411	Pgk1	PGK1_MOUSE	P09411_K272	TB_24H-MOCK_24H	4.1028	2.50613e-11	3.06904e-09	no	4.1028	3.06904e-09	Phosphoglycerate kinase 1 (EC 2.7.2.3)
P09411	Pgk1	PGK1_MOUSE	P09411_K184	TB_24H-MOCK_24H	2.65545	4.62464e-05	0.000474996	no	2.65545	0.000474996	Phosphoglycerate kinase 1 (EC 2.7.2.3)
P09528	Fth1	FRIH_MOUSE	P09528_K72,Q9D5H4_K127	TB_24H-MOCK_24H	#NUM!		0	yes	6.22951	0.0424971	Ferritin heavy chain (Ferritin H subunit) (EC 1.16.3.1) [Cleaved into: Ferritin heavy chain, N-terminally processed]
P09581	Csf1r	CSF1R_MOUSE	P09581_K584	TB_24H-MOCK_24H	-0.269531	0.569835	0.723427	no	-0.269531	0.723427	Macrophage colony-stimulating factor 1 receptor (CSF-1 receptor) (CSF-1-R) (CSF-1R) (M-CSF-R) (EC 2.7.10.1) (Proto-oncogene c-Fms) (CD antigen CD115)
P09581	Csf1r	CSF1R_MOUSE	P09581_K791	TB_24H-MOCK_24H	-0.919757	0.0829899	0.199879	no	-0.919757	0.199879	Macrophage colony-stimulating factor 1 receptor (CSF-1 receptor) (CSF-1-R) (CSF-1R) (M-CSF-R) (EC 2.7.10.1) (Proto-oncogene c-Fms) (CD antigen CD115)
P09581	Csf1r	CSF1R_MOUSE	P09581_K810	TB_24H-MOCK_24H	0.554672	0.220595	0.400442	no	0.554672	0.400442	Macrophage colony-stimulating factor 1 receptor (CSF-1 receptor) (CSF-1-R) (CSF-1R) (M-CSF-R) (EC 2.7.10.1) (Proto-oncogene c-Fms) (CD antigen CD115)
P09581	Csf1r	CSF1R_MOUSE	P09581_K610	TB_24H-MOCK_24H	#NUM!		0	yes	2.40439	0.0113525	Macrophage colony-stimulating factor 1 receptor (CSF-1 receptor) (CSF-1-R) (CSF-1R) (M-CSF-R) (EC 2.7.10.1) (Proto-oncogene c-Fms) (CD antigen CD115)
P0C0S6	H2afz	H2AZ_MOUSE	P0C0S6_K116,Q3THW5_K116	TB_24H-MOCK_24H	-1.30308	0.157981	0.320509	no	-1.30308	0.320509	Histone H2A.Z (H2A/z)
P0C0S6	H2afz	H2AZ_MOUSE	P0C0S6_K126	TB_24H-MOCK_24H	-0.13856	0.736637	0.841871	no	-0.13856	0.841871	Histone H2A.Z (H2A/z)
P0C0S6	H2afz	H2AZ_MOUSE	P0C0S6_K121,Q3THW5_K121	TB_24H-MOCK_24H	-0.838714	0.502936	0.67347	no	-0.838714	0.67347	Histone H2A.Z (H2A/z)
P0C0S6	H2afz	H2AZ_MOUSE	P0C0S6_K121,P0C0S6_K122,Q3THW5_K121,Q3THW5_K122	TB_24H-MOCK_24H	-0.686929	0.00333404	0.0178714	no	-0.686929	0.0178714	Histone H2A.Z (H2A/z)
P0C0S6	H2afz	H2AZ_MOUSE	P0C0S6_K122,Q3THW5_K122	TB_24H-MOCK_24H	-0.881803	0.140134	0.294318	no	-0.881803	0.294318	Histone H2A.Z (H2A/z)
P0CG49	Ubb	UBB_MOUSE	P62983_K27,P0CG50_K27,P0CG49_K27,P62984_K27	TB_24H-MOCK_24H	2.39745	0.000153999	0.00136874	no	2.39745	0.00136874	Polyubiquitin-B [Cleaved into: Ubiquitin]
P0CG49	Ubb	UBB_MOUSE	P62983_K63,P0CG50_K63,P0CG49_K63,P62984_K63	TB_24H-MOCK_24H	1.38894	0.0411324	0.121264	no	1.38894	0.121264	Polyubiquitin-B [Cleaved into: Ubiquitin]
P0CG49	Ubb	UBB_MOUSE	P62983_K11,P0CG50_K11,P0CG49_K11,P62984_K11	TB_24H-MOCK_24H	1.79352	0.0145646	0.0553385	no	1.79352	0.0553385	Polyubiquitin-B [Cleaved into: Ubiquitin]
P0CG49	Ubb	UBB_MOUSE	P62983_K33,P0CG50_K33,P0CG49_K33,P62984_K33	TB_24H-MOCK_24H	0.186755	0.894452	0.936821	no	0.186755	0.936821	Polyubiquitin-B [Cleaved into: Ubiquitin]
P0CG49	Ubb	UBB_MOUSE	P62983_K48,P0CG50_K48,P0CG49_K48,P62984_K48	TB_24H-MOCK_24H	0.807929	0.0823416	0.198618	no	0.807929	0.198618	Polyubiquitin-B [Cleaved into: Ubiquitin]
P0CG49	Ubb	UBB_MOUSE	P62983_K6,P0CG50_K6,P0CG49_K6,P62984_K6	TB_24H-MOCK_24H	1.6202	2.71022e-06	4.59008e-05	no	1.6202	4.59008e-05	Polyubiquitin-B [Cleaved into: Ubiquitin]
P0CG49	Ubb	UBB_MOUSE	P62983_K29,P0CG50_K29,P0CG49_K29,P62984_K29	TB_24H-MOCK_24H	-0.480596	0.24527	0.431459	no	-0.480596	0.431459	Polyubiquitin-B [Cleaved into: Ubiquitin]
P0CG49	Ubb	UBB_MOUSE	P0CG50_K82,P0CG49_K82	TB_24H-MOCK_24H	#NUM!		0	yes	5.62042	0.0212717	Polyubiquitin-B [Cleaved into: Ubiquitin]
P0DOV1	Mnda	IFI5B_MOUSE	P0DOV2_K210,P0DOV1_K210,Q8CGE8_K189	TB_24H-MOCK_24H	1.79082	6.2021e-08	2.14647e-06	no	1.79082	2.14647e-06	Interferon-activable protein 205-B (Ifi-205-B) (Interferon-inducible protein p205-B) (Myeloid cell nuclear differentiation antigen) (Protein D3)
P0DOV2	Ifi204	IFI4_MOUSE	P0DOV2_K155	TB_24H-MOCK_24H	1.02531	0.0645663	0.167736	no	1.02531	0.167736	Interferon-activable protein 204 (Ifi-204) (Interferon-inducible protein p204)
P0DOV2	Ifi204	IFI4_MOUSE	P0DOV2_K476	TB_24H-MOCK_24H	#NUM!		0	yes	5.52607	0.0357186	Interferon-activable protein 204 (Ifi-204) (Interferon-inducible protein p204)
P0DOV2	Ifi204	IFI4_MOUSE	P0DOV2_K449	TB_24H-MOCK_24H	#NUM!		0	yes	5.38614	0.0494947	Interferon-activable protein 204 (Ifi-204) (Interferon-inducible protein p204)
P0DOV2	Ifi204	IFI4_MOUSE	P0DOV2_K469	TB_24H-MOCK_24H	#NUM!		0	yes	3.18979	0.0228929	Interferon-activable protein 204 (Ifi-204) (Interferon-inducible protein p204)
P10107	Anxa1	ANXA1_MOUSE	P10107_K9	TB_24H-MOCK_24H	0.198136	0.391102	0.57812	no	0.198136	0.57812	Annexin A1 (Annexin I) (Annexin-1) (Calpactin II) (Calpactin-2) (Chromobindin-9) (Lipocortin I) (Phospholipase A2 inhibitory protein) (p35)
P10107	Anxa1	ANXA1_MOUSE	P10107_K26	TB_24H-MOCK_24H	0.245545	0.563425	0.718153	no	0.245545	0.718153	Annexin A1 (Annexin I) (Annexin-1) (Calpactin II) (Calpactin-2) (Chromobindin-9) (Lipocortin I) (Phospholipase A2 inhibitory protein) (p35)
P10107	Anxa1	ANXA1_MOUSE	P10107_K287	TB_24H-MOCK_24H	-0.396656	0.433442	0.616107	no	-0.396656	0.616107	Annexin A1 (Annexin I) (Annexin-1) (Calpactin II) (Calpactin-2) (Chromobindin-9) (Lipocortin I) (Phospholipase A2 inhibitory protein) (p35)
P10107	Anxa1	ANXA1_MOUSE	P10107_K214	TB_24H-MOCK_24H	0.164635	0.806043	0.886201	no	0.164635	0.886201	Annexin A1 (Annexin I) (Annexin-1) (Calpactin II) (Calpactin-2) (Chromobindin-9) (Lipocortin I) (Phospholipase A2 inhibitory protein) (p35)
P10107	Anxa1	ANXA1_MOUSE	P10107_K312	TB_24H-MOCK_24H	0.197978	0.699366	0.813735	no	0.197978	0.813735	Annexin A1 (Annexin I) (Annexin-1) (Calpactin II) (Calpactin-2) (Chromobindin-9) (Lipocortin I) (Phospholipase A2 inhibitory protein) (p35)
P10107	Anxa1	ANXA1_MOUSE	P10107_K185	TB_24H-MOCK_24H	-0.531893	0.213006	0.391125	no	-0.531893	0.391125	Annexin A1 (Annexin I) (Annexin-1) (Calpactin II) (Calpactin-2) (Chromobindin-9) (Lipocortin I) (Phospholipase A2 inhibitory protein) (p35)
P10107	Anxa1	ANXA1_MOUSE	P10107_K29	TB_24H-MOCK_24H	0.382568	0.495985	0.669159	no	0.382568	0.669159	Annexin A1 (Annexin I) (Annexin-1) (Calpactin II) (Calpactin-2) (Chromobindin-9) (Lipocortin I) (Phospholipase A2 inhibitory protein) (p35)
P10126	Eef1a1	EF1A1_MOUSE	P10126_K453	TB_24H-MOCK_24H	-0.267996	0.342897	0.528619	no	-0.267996	0.528619	Elongation factor 1-alpha 1 (EF-1-alpha-1) (Elongation factor Tu) (EF-Tu) (Eukaryotic elongation factor 1 A-1) (eEF1A-1)
P10126	Eef1a1	EF1A1_MOUSE	P10126_K439	TB_24H-MOCK_24H	0.865889	0.00698638	0.0312425	no	0.865889	0.0312425	Elongation factor 1-alpha 1 (EF-1-alpha-1) (Elongation factor Tu) (EF-Tu) (Eukaryotic elongation factor 1 A-1) (eEF1A-1)
P10126	Eef1a1	EF1A1_MOUSE	P10126_K385	TB_24H-MOCK_24H	-0.433606	0.251119	0.438838	no	-0.433606	0.438838	Elongation factor 1-alpha 1 (EF-1-alpha-1) (Elongation factor Tu) (EF-Tu) (Eukaryotic elongation factor 1 A-1) (eEF1A-1)
P10126	Eef1a1	EF1A1_MOUSE	P10126_K395	TB_24H-MOCK_24H	-0.32491	0.487904	0.66502	no	-0.32491	0.66502	Elongation factor 1-alpha 1 (EF-1-alpha-1) (Elongation factor Tu) (EF-Tu) (Eukaryotic elongation factor 1 A-1) (eEF1A-1)
P10749	Il1b	IL1B_MOUSE	P10749_K224	TB_24H-MOCK_24H	#NUM!		0	yes	3.66842	0.0349794	Interleukin-1 beta (IL-1 beta)
P10749	Il1b	IL1B_MOUSE	P10749_K220	TB_24H-MOCK_24H	#NUM!		0	yes	5.21087	0.0128813	Interleukin-1 beta (IL-1 beta)
P10810	Cd14	CD14_MOUSE	P10810_K67	TB_24H-MOCK_24H	#NUM!		0	yes	5.80895	0.0424991	Monocyte differentiation antigen CD14 (Myeloid cell-specific leucine-rich glycoprotein) (CD antigen CD14)
P10853	Hist1h2bf; Hist1h2bj; Hist1h2bl; Hist1h2bn	H2B1F_MOUSE	Q6ZWY9_K117,P10853_K117,Q8CGP2_K117,Q64478_K117,Q8CGP0_K117,Q9D2U9_K117,P70696_K118,P10854_K117,Q64475_K117,Q64525_K117	TB_24H-MOCK_24H	1.54139	0.403632	0.587964	no	1.54139	0.587964	Histone H2B type 1-F/J/L (H2B 291A)
P10853	Hist1h2bf; Hist1h2bj; Hist1h2bl; Hist1h2bn	H2B1F_MOUSE	Q6ZWY9_K109,P10853_K109,Q8CGP2_K109,Q64478_K109,Q8CGP0_K109,Q9D2U9_K109,P70696_K110,P10854_K109,Q64475_K109,Q64525_K109,Q8CGP1_K109,Q64524_K109	TB_24H-MOCK_24H	-0.566447	0.25326	0.440645	no	-0.566447	0.440645	Histone H2B type 1-F/J/L (H2B 291A)
P10853	Hist1h2bf; Hist1h2bj; Hist1h2bl; Hist1h2bn	H2B1F_MOUSE	Q6ZWY9_K121,P10853_K121,Q8CGP2_K121,Q64478_K121,Q8CGP0_K121,Q9D2U9_K121,P70696_K122,P10854_K121,Q64475_K121,Q64525_K121,Q8CGP1_K121,Q64524_K121	TB_24H-MOCK_24H	#NUM!		0	yes	-5.40665	0.0300858	Histone H2B type 1-F/J/L (H2B 291A)
P10853	Hist1h2bf; Hist1h2bj; Hist1h2bl; Hist1h2bn	H2B1F_MOUSE	Q6ZWY9_K117,P10853_K117,Q8CGP2_K117,Q64478_K117,Q8CGP0_K117,Q9D2U9_K117,P70696_K118,P10854_K117,Q64475_K117,Q64525_K117,Q8CGP1_K117,Q64524_K117	TB_24H-MOCK_24H	-0.965038	0.0435398	0.126951	no	-0.965038	0.126951	Histone H2B type 1-F/J/L (H2B 291A)
P10853	Hist1h2bf; Hist1h2bj; Hist1h2bl; Hist1h2bn	H2B1F_MOUSE	Q6ZWY9_K47,P10853_K47,Q8CGP2_K47,Q64478_K47,Q8CGP0_K47,Q9D2U9_K47,P70696_K48,P10854_K47,Q64475_K47,Q64525_K47,Q8CGP1_K47,Q64524_K47	TB_24H-MOCK_24H	-1.03721	0.000581201	0.00409412	no	-1.03721	0.00409412	Histone H2B type 1-F/J/L (H2B 291A)
P10853	Hist1h2bf; Hist1h2bj; Hist1h2bl; Hist1h2bn	H2B1F_MOUSE	Q6ZWY9_K6,P10853_K6,Q64478_K6,Q8CGP1_K6	TB_24H-MOCK_24H	-0.618732	0.228944	0.411376	no	-0.618732	0.411376	Histone H2B type 1-F/J/L (H2B 291A)
P10853	Hist1h2bf; Hist1h2bj; Hist1h2bl; Hist1h2bn	H2B1F_MOUSE	Q6ZWY9_K126,P10853_K126,Q8CGP2_K126,Q64478_K126,Q8CGP0_K126,Q9D2U9_K126,P70696_K127,P10854_K126,Q64475_K126,Q64525_K126	TB_24H-MOCK_24H	-1.03822	0.185851	0.356953	no	-1.03822	0.356953	Histone H2B type 1-F/J/L (H2B 291A)
P10853	Hist1h2bf; Hist1h2bj; Hist1h2bl; Hist1h2bn	H2B1F_MOUSE	Q6ZWY9_K21,P10853_K21,Q8CGP2_K21,Q8CGP0_K21,P10854_K21,Q8CGP1_K21,Q64524_K21	TB_24H-MOCK_24H	-0.518809	0.447761	0.628603	no	-0.518809	0.628603	Histone H2B type 1-F/J/L (H2B 291A)
P10853	Hist1h2bf; Hist1h2bj; Hist1h2bl; Hist1h2bn	H2B1F_MOUSE	Q6ZWY9_K121,P10853_K121,Q8CGP2_K121,Q64478_K121,Q8CGP0_K121,Q9D2U9_K121,P70696_K122,P10854_K121,Q64475_K121,Q64525_K121	TB_24H-MOCK_24H	-0.609884	0.644609	0.775675	no	-0.609884	0.775675	Histone H2B type 1-F/J/L (H2B 291A)
P10854	Hist1h2bm	H2B1M_MOUSE	P10854_K6	TB_24H-MOCK_24H	-0.79108	0.138082	0.291548	no	-0.79108	0.291548	Histone H2B type 1-M (H2B 291B)
P10922	H1f0	H10_MOUSE	P10922_K82	TB_24H-MOCK_24H	#NUM!		0	yes	-4.14359	0.015143	Histone H1.0 (Histone H1') (Histone H1(0)) (MyD196) [Cleaved into: Histone H1.0, N-terminally processed]
P11438	Lamp1	LAMP1_MOUSE	P11438_K145	TB_24H-MOCK_24H	#NUM!		0	yes	2.81439	0.0479541	Lysosome-associated membrane glycoprotein 1 (LAMP-1) (Lysosome-associated membrane protein 1) (120 kDa lysosomal membrane glycoprotein) (CD107 antigen-like family member A) (LGP-120) (Lysosomal membrane glycoprotein A) (LGP-A) (P2B) (CD antigen CD107a)
P11499	Hsp90ab1	HS90B_MOUSE	P11499_K428	TB_24H-MOCK_24H	1.63351	0.027705	0.089284	no	1.63351	0.089284	Heat shock protein HSP 90-beta (Heat shock 84 kDa) (HSP 84) (HSP84) (Tumor-specific transplantation 84 kDa antigen) (TSTA)
P11499	Hsp90ab1	HS90B_MOUSE	P11499_K438	TB_24H-MOCK_24H	1.49351	0.000531472	0.00384593	no	1.49351	0.00384593	Heat shock protein HSP 90-beta (Heat shock 84 kDa) (HSP 84) (HSP84) (Tumor-specific transplantation 84 kDa antigen) (TSTA)
P11499	Hsp90ab1	HS90B_MOUSE	P11499_K435	TB_24H-MOCK_24H	2.27711	4.56417e-11	4.59404e-09	no	2.27711	4.59404e-09	Heat shock protein HSP 90-beta (Heat shock 84 kDa) (HSP 84) (HSP84) (Tumor-specific transplantation 84 kDa antigen) (TSTA)
P11499	Hsp90ab1	HS90B_MOUSE	P11499_K423	TB_24H-MOCK_24H	#NUM!		0	yes	4.63602	0.0176931	Heat shock protein HSP 90-beta (Heat shock 84 kDa) (HSP 84) (HSP84) (Tumor-specific transplantation 84 kDa antigen) (TSTA)
P11499	Hsp90ab1	HS90B_MOUSE	P11499_K491	TB_24H-MOCK_24H	1.34299	0.00345332	0.0183256	no	1.34299	0.0183256	Heat shock protein HSP 90-beta (Heat shock 84 kDa) (HSP 84) (HSP84) (Tumor-specific transplantation 84 kDa antigen) (TSTA)
P11531	Dmd	DMD_MOUSE	P11531_K3301	TB_24H-MOCK_24H	0.100573	0.857738	0.917064	no	0.100573	0.917064	Dystrophin
P11835	Itgb2	ITB2_MOUSE	P11835_K757	TB_24H-MOCK_24H	0.20402	0.591167	0.735839	no	0.20402	0.735839	Integrin beta-2 (Cell surface adhesion glycoproteins LFA-1/CR3/p150,95 subunit beta) (Complement receptor C3 subunit beta) (CD antigen CD18)
P11835	Itgb2	ITB2_MOUSE	P11835_K746	TB_24H-MOCK_24H	0.809652	0.0360711	0.110646	no	0.809652	0.110646	Integrin beta-2 (Cell surface adhesion glycoproteins LFA-1/CR3/p150,95 subunit beta) (Complement receptor C3 subunit beta) (CD antigen CD18)
P11928	Oas1a	OAS1A_MOUSE	Q9Z2F2_K66,P11928_K61	TB_24H-MOCK_24H	#NUM!		0	yes	3.47303	0.0172478	2'-5'-oligoadenylate synthase 1A ((2-5')oligo(A) synthase 1A) (2-5A synthase 1A) (EC 2.7.7.84) (p42 OAS)
P11928	Oas1a	OAS1A_MOUSE	P11928_K43	TB_24H-MOCK_24H	1.98138	0.000256998	0.00208746	no	1.98138	0.00208746	2'-5'-oligoadenylate synthase 1A ((2-5')oligo(A) synthase 1A) (2-5A synthase 1A) (EC 2.7.7.84) (p42 OAS)
P11928	Oas1a	OAS1A_MOUSE	P11928_K105	TB_24H-MOCK_24H	#NUM!		0	yes	3.75912	0.0177606	2'-5'-oligoadenylate synthase 1A ((2-5')oligo(A) synthase 1A) (2-5A synthase 1A) (EC 2.7.7.84) (p42 OAS)
P11928	Oas1a	OAS1A_MOUSE	P11928_K67	TB_24H-MOCK_24H	3.61115	0.00237197	0.0135347	no	3.61115	0.0135347	2'-5'-oligoadenylate synthase 1A ((2-5')oligo(A) synthase 1A) (2-5A synthase 1A) (EC 2.7.7.84) (p42 OAS)
P11983	Tcp1	TCPA_MOUSE	P11983_K368	TB_24H-MOCK_24H	1.56815	0.0250795	0.0831802	no	1.56815	0.0831802	T-complex protein 1 subunit alpha (TCP-1-alpha) (CCT-alpha) (Tailless complex polypeptide 1A) (TCP-1-A) (Tailless complex polypeptide 1B) (TCP-1-B)
P11983	Tcp1	TCPA_MOUSE	P11983_K126	TB_24H-MOCK_24H	0.92369	1.6164e-05	0.000194948	no	0.92369	0.000194948	T-complex protein 1 subunit alpha (TCP-1-alpha) (CCT-alpha) (Tailless complex polypeptide 1A) (TCP-1-A) (Tailless complex polypeptide 1B) (TCP-1-B)
P12382	Pfkl	PFKAL_MOUSE	P12382_K727	TB_24H-MOCK_24H	1.97771	0.000808188	0.00540654	no	1.97771	0.00540654	ATP-dependent 6-phosphofructokinase, liver type (ATP-PFK) (PFK-L) (EC 2.7.1.11) (6-phosphofructokinase type B) (Phosphofructo-1-kinase isozyme B) (PFK-B) (Phosphohexokinase)
P12382	Pfkl	PFKAL_MOUSE	P12382_K392	TB_24H-MOCK_24H	#NUM!		0	yes	5.01007	0.0306414	ATP-dependent 6-phosphofructokinase, liver type (ATP-PFK) (PFK-L) (EC 2.7.1.11) (6-phosphofructokinase type B) (Phosphofructo-1-kinase isozyme B) (PFK-B) (Phosphohexokinase)
P12382	Pfkl	PFKAL_MOUSE	P12382_K726	TB_24H-MOCK_24H	1.42656	0.00497653	0.0241544	no	1.42656	0.0241544	ATP-dependent 6-phosphofructokinase, liver type (ATP-PFK) (PFK-L) (EC 2.7.1.11) (6-phosphofructokinase type B) (Phosphofructo-1-kinase isozyme B) (PFK-B) (Phosphohexokinase)
P12849	Prkar1b	KAP1_MOUSE	Q9DBC7_K349,P12849_K349	TB_24H-MOCK_24H	0.654933	0.0220531	0.0751788	no	0.654933	0.0751788	cAMP-dependent protein kinase type I-beta regulatory subunit
P12849	Prkar1b	KAP1_MOUSE	Q9DBC7_K346,P12849_K346	TB_24H-MOCK_24H	0.0793094	0.861836	0.920217	no	0.0793094	0.920217	cAMP-dependent protein kinase type I-beta regulatory subunit
P12970	Rpl7a	RL7A_MOUSE	P12970_K34	TB_24H-MOCK_24H	-1.21199	0.0146655	0.0555891	no	-1.21199	0.0555891	60S ribosomal protein L7a (Surfeit locus protein 3)
P12970	Rpl7a	RL7A_MOUSE	P12970_K20	TB_24H-MOCK_24H	0.143804	0.781315	0.865591	no	0.143804	0.865591	60S ribosomal protein L7a (Surfeit locus protein 3)
P12970	Rpl7a	RL7A_MOUSE	P12970_K97	TB_24H-MOCK_24H	0.303897	0.465944	0.646153	no	0.303897	0.646153	60S ribosomal protein L7a (Surfeit locus protein 3)
P12970	Rpl7a	RL7A_MOUSE	P12970_K75	TB_24H-MOCK_24H	1.23961	0.0966721	0.22402	no	1.23961	0.22402	60S ribosomal protein L7a (Surfeit locus protein 3)
P12970	Rpl7a	RL7A_MOUSE	P12970_K151	TB_24H-MOCK_24H	#NUM!		0	yes	4.54973	0.0150227	60S ribosomal protein L7a (Surfeit locus protein 3)
P12970	Rpl7a	RL7A_MOUSE	P12970_K150	TB_24H-MOCK_24H	1.12525	0.023733	0.0802184	no	1.12525	0.0802184	60S ribosomal protein L7a (Surfeit locus protein 3)
P12970	Rpl7a	RL7A_MOUSE	P12970_K25	TB_24H-MOCK_24H	0.357823	0.345045	0.529713	no	0.357823	0.529713	60S ribosomal protein L7a (Surfeit locus protein 3)
P12970	Rpl7a	RL7A_MOUSE	P12970_K37	TB_24H-MOCK_24H	-1.25244	0.00168495	0.0101224	no	-1.25244	0.0101224	60S ribosomal protein L7a (Surfeit locus protein 3)
P12970	Rpl7a	RL7A_MOUSE	P12970_K11	TB_24H-MOCK_24H	-0.709635	0.274706	0.460981	no	-0.709635	0.460981	60S ribosomal protein L7a (Surfeit locus protein 3)
P13020	Gsn	GELS_MOUSE	P13020_K366	TB_24H-MOCK_24H	1.67113	0.00186301	0.0110669	no	1.67113	0.0110669	Gelsolin (Actin-depolymerizing factor) (ADF) (Brevin)
P13597	Icam1	ICAM1_MOUSE	P13597_K531	TB_24H-MOCK_24H	1.71147	0.00583285	0.026911	no	1.71147	0.026911	Intercellular adhesion molecule 1 (ICAM-1) (MALA-2) (MyD10) (CD antigen CD54)
P13597	Icam1	ICAM1_MOUSE	P13597_K529	TB_24H-MOCK_24H	1.08808	0.213662	0.391877	no	1.08808	0.391877	Intercellular adhesion molecule 1 (ICAM-1) (MALA-2) (MyD10) (CD antigen CD54)
P13864	Dnmt1	DNMT1_MOUSE	P13864_K674	TB_24H-MOCK_24H	-0.0702457	0.917611	0.950889	no	-0.0702457	0.950889	DNA (cytosine-5)-methyltransferase 1 (Dnmt1) (Met-1) (EC 2.1.1.37) (DNA methyltransferase MmuI) (DNA MTase MmuI) (M.MmuI) (MCMT)
P13864	Dnmt1	DNMT1_MOUSE	P13864_K671	TB_24H-MOCK_24H	-0.741262	0.200245	0.375047	no	-0.741262	0.375047	DNA (cytosine-5)-methyltransferase 1 (Dnmt1) (Met-1) (EC 2.1.1.37) (DNA methyltransferase MmuI) (DNA MTase MmuI) (M.MmuI) (MCMT)
P13864	Dnmt1	DNMT1_MOUSE	P13864_K669	TB_24H-MOCK_24H	-1.614	0.0139951	0.053817	no	-1.614	0.053817	DNA (cytosine-5)-methyltransferase 1 (Dnmt1) (Met-1) (EC 2.1.1.37) (DNA methyltransferase MmuI) (DNA MTase MmuI) (M.MmuI) (MCMT)
P13864	Dnmt1	DNMT1_MOUSE	P13864_K691	TB_24H-MOCK_24H	-2.02414	0.00184885	0.0110238	no	-2.02414	0.0110238	DNA (cytosine-5)-methyltransferase 1 (Dnmt1) (Met-1) (EC 2.1.1.37) (DNA methyltransferase MmuI) (DNA MTase MmuI) (M.MmuI) (MCMT)
P14115	Rpl27a	RL27A_MOUSE	P14115_K116	TB_24H-MOCK_24H	-0.6766	0.011773	0.0478126	no	-0.6766	0.0478126	60S ribosomal protein L27a (L29)
P14115	Rpl27a	RL27A_MOUSE	P14115_K125	TB_24H-MOCK_24H	-0.742616	0.188325	0.35992	no	-0.742616	0.35992	60S ribosomal protein L27a (L29)
P14131	Rps16	RS16_MOUSE	P14131_K4	TB_24H-MOCK_24H	-0.0886226	0.812663	0.890406	no	-0.0886226	0.890406	40S ribosomal protein S16
P14148	Rpl7	RL7_MOUSE	P14148_K19	TB_24H-MOCK_24H	-0.492442	0.178225	0.347713	no	-0.492442	0.347713	60S ribosomal protein L7
P14148	Rpl7	RL7_MOUSE	P14148_K20	TB_24H-MOCK_24H	-0.506808	0.392281	0.578251	no	-0.506808	0.578251	60S ribosomal protein L7
P14152	Mdh1	MDHC_MOUSE	P14152_K110	TB_24H-MOCK_24H	0.703286	0.172734	0.341606	no	0.703286	0.341606	Malate dehydrogenase, cytoplasmic (EC 1.1.1.37) (Cytosolic malate dehydrogenase)
P14152	Mdh1	MDHC_MOUSE	P14152_K142	TB_24H-MOCK_24H	0.7664	0.121035	0.26216	no	0.7664	0.26216	Malate dehydrogenase, cytoplasmic (EC 1.1.1.37) (Cytosolic malate dehydrogenase)
P14206	Rpsa	RSSA_MOUSE	P14206_K89	TB_24H-MOCK_24H	0.218101	0.525147	0.686963	no	0.218101	0.686963	40S ribosomal protein SA (37 kDa laminin receptor precursor) (37LRP) (37 kDa oncofetal antigen) (37/67 kDa laminin receptor) (LRP/LR) (67 kDa laminin receptor) (67LR) (Laminin receptor 1) (LamR) (Laminin-binding protein precursor p40) (LBP/p40) (OFA/iLRP)
P14733	Lmnb1	LMNB1_MOUSE	P14733_K390,P21619_K381	TB_24H-MOCK_24H	-1.59144	1.89237e-05	0.000221671	no	-1.59144	0.000221671	Lamin-B1
P14733	Lmnb1	LMNB1_MOUSE	P14733_K313	TB_24H-MOCK_24H	-1.48185	0.0250666	0.0831802	no	-1.48185	0.0831802	Lamin-B1
P14733	Lmnb1	LMNB1_MOUSE	P14733_K135	TB_24H-MOCK_24H	-1.20267	0.0484143	0.138128	no	-1.20267	0.138128	Lamin-B1
P14824	Anxa6	ANXA6_MOUSE	P14824_K3	TB_24H-MOCK_24H	0.771488	0.00382118	0.0199299	no	0.771488	0.0199299	Annexin A6 (67 kDa calelectrin) (Annexin VI) (Annexin-6) (Calphobindin-II) (CPB-II) (Chromobindin-20) (Lipocortin VI) (Protein III) (p68) (p70)
P14869	Rplp0	RLA0_MOUSE	P14869_K38	TB_24H-MOCK_24H	0.30865	0.595767	0.738237	no	0.30865	0.738237	60S acidic ribosomal protein P0 (60S ribosomal protein L10E)
P14901	Hmox1	HMOX1_MOUSE	P14901_K148	TB_24H-MOCK_24H	1.40697	0.000219017	0.00183513	no	1.40697	0.00183513	Heme oxygenase 1 (HO-1) (EC 1.14.14.18) (P32 protein)
P14901	Hmox1	HMOX1_MOUSE	P14901_K149	TB_24H-MOCK_24H	#NUM!		0	yes	4.70262	0.0395101	Heme oxygenase 1 (HO-1) (EC 1.14.14.18) (P32 protein)
P15261	Ifngr1	INGR1_MOUSE	P15261_K292	TB_24H-MOCK_24H	-1.33375	0.0568151	0.153427	no	-1.33375	0.153427	Interferon gamma receptor 1 (IFN-gamma receptor 1) (IFN-gamma-R1) (Interferon gamma receptor alpha-chain) (IFN-gamma-R-alpha) (CD antigen CD119)
P15261	Ifngr1	INGR1_MOUSE	P15261_K299	TB_24H-MOCK_24H	-1.32904	0.00134026	0.00836743	no	-1.32904	0.00836743	Interferon gamma receptor 1 (IFN-gamma receptor 1) (IFN-gamma-R1) (Interferon gamma receptor alpha-chain) (IFN-gamma-R-alpha) (CD antigen CD119)
P15261	Ifngr1	INGR1_MOUSE	P15261_K306	TB_24H-MOCK_24H	#NUM!		0	yes	-3.21307	0.0244875	Interferon gamma receptor 1 (IFN-gamma receptor 1) (IFN-gamma-R1) (Interferon gamma receptor alpha-chain) (IFN-gamma-R-alpha) (CD antigen CD119)
P15331	Prph	PERI_MOUSE	P20152_K292,P15331_K292	TB_24H-MOCK_24H	-0.815224	0.113784	0.2502	no	-0.815224	0.2502	Peripherin
P15331	Prph	PERI_MOUSE	P20152_K294,P15331_K294	TB_24H-MOCK_24H	#NUM!		0	yes	5.69686	0.0101478	Peripherin
P15379	Cd44	CD44_MOUSE	P15379_K74	TB_24H-MOCK_24H	#NUM!		0	yes	3.23369	0.0115765	CD44 antigen (Extracellular matrix receptor III) (ECMR-III) (GP90 lymphocyte homing/adhesion receptor) (HUTCH-I) (Hermes antigen) (Hyaluronate receptor) (Lymphocyte antigen 24) (Ly-24) (Phagocytic glycoprotein 1) (PGP-1) (Phagocytic glycoprotein I) (PGP-I) (CD antigen CD44)
P15379	Cd44	CD44_MOUSE	P15379_K775	TB_24H-MOCK_24H	-0.520943	0.387941	0.576121	no	-0.520943	0.576121	CD44 antigen (Extracellular matrix receptor III) (ECMR-III) (GP90 lymphocyte homing/adhesion receptor) (HUTCH-I) (Hermes antigen) (Hyaluronate receptor) (Lymphocyte antigen 24) (Ly-24) (Phagocytic glycoprotein 1) (PGP-1) (Phagocytic glycoprotein I) (PGP-I) (CD antigen CD44)
P15532	Nme1	NDKA_MOUSE	Q01768_K100,P15532_K100	TB_24H-MOCK_24H	2.28714	0.000323701	0.00253858	no	2.28714	0.00253858	Nucleoside diphosphate kinase A (NDK A) (NDP kinase A) (EC 2.7.4.6) (Metastasis inhibition factor NM23) (NDPK-A) (Tumor metastatic process-associated protein) (nm23-M1)
P15533	Trim30a	TR30A_MOUSE	P15533_K272	TB_24H-MOCK_24H	1.45555	1.69322e-06	3.20905e-05	no	1.45555	3.20905e-05	Tripartite motif-containing protein 30A (Down regulatory protein of interleukin-2 receptor) (Tripartite motif-containing protein 30)
P15533	Trim30a	TR30A_MOUSE	P15533_K316	TB_24H-MOCK_24H	3.03984	1.46476e-06	2.84377e-05	no	3.03984	2.84377e-05	Tripartite motif-containing protein 30A (Down regulatory protein of interleukin-2 receptor) (Tripartite motif-containing protein 30)
P15533	Trim30a	TR30A_MOUSE	P15533_K318	TB_24H-MOCK_24H	#NUM!		0	yes	5.73563	0.0125062	Tripartite motif-containing protein 30A (Down regulatory protein of interleukin-2 receptor) (Tripartite motif-containing protein 30)
P15864	Hist1h1c	H12_MOUSE	P15864_K121	TB_24H-MOCK_24H	-1.04116	0.0926733	0.216964	no	-1.04116	0.216964	Histone H1.2 (H1 VAR.1) (H1c)
P15864	Hist1h1c	H12_MOUSE	P15864_K75,Q07133_K77,P43274_K75,P43277_K76	TB_24H-MOCK_24H	-1.58333	0.000413356	0.00314862	no	-1.58333	0.00314862	Histone H1.2 (H1 VAR.1) (H1c)
P15864	Hist1h1c	H12_MOUSE	P15864_K17	TB_24H-MOCK_24H	-1.26436	0.0418459	0.122686	no	-1.26436	0.122686	Histone H1.2 (H1 VAR.1) (H1c)
P15864	Hist1h1c	H12_MOUSE	P15864_K85,P43274_K85,P43276_K85,P43277_K86	TB_24H-MOCK_24H	-0.638722	0.393321	0.579248	no	-0.638722	0.579248	Histone H1.2 (H1 VAR.1) (H1c)
P15864	Hist1h1c	H12_MOUSE	P15864_K90	TB_24H-MOCK_24H	-1.79217	3.24559e-07	8.61163e-06	no	-1.79217	8.61163e-06	Histone H1.2 (H1 VAR.1) (H1c)
P15864	Hist1h1c	H12_MOUSE	P15864_K109,P43274_K109,P43276_K109,P43277_K110	TB_24H-MOCK_24H	-1.55855	0.0486569	0.138325	no	-1.55855	0.138325	Histone H1.2 (H1 VAR.1) (H1c)
P15864	Hist1h1c	H12_MOUSE	P15864_K140,P43277_K141	TB_24H-MOCK_24H	-1.0488	0.391764	0.578128	no	-1.0488	0.578128	Histone H1.2 (H1 VAR.1) (H1c)
P15864	Hist1h1c	H12_MOUSE	P15864_K110	TB_24H-MOCK_24H	-1.38492	0.0765465	0.188641	no	-1.38492	0.188641	Histone H1.2 (H1 VAR.1) (H1c)
P15864	Hist1h1c	H12_MOUSE	P15864_K110,P43274_K110,P43276_K110,P43277_K111	TB_24H-MOCK_24H	-0.701152	0.417586	0.602117	no	-0.701152	0.602117	Histone H1.2 (H1 VAR.1) (H1c)
P15864	Hist1h1c	H12_MOUSE	P15864_K34,P43277_K35	TB_24H-MOCK_24H	-3.29085	1.91868e-06	3.59358e-05	no	-3.29085	3.59358e-05	Histone H1.2 (H1 VAR.1) (H1c)
P15864	Hist1h1c	H12_MOUSE	P15864_K64,Q07133_K66,P43274_K64,P43277_K65	TB_24H-MOCK_24H	-1.54337	0.0274791	0.0889161	no	-1.54337	0.0889161	Histone H1.2 (H1 VAR.1) (H1c)
P15864	Hist1h1c	H12_MOUSE	P15864_K106,P43274_K106,P43276_K106,P43277_K107	TB_24H-MOCK_24H	-1.6991	0.0452205	0.131131	no	-1.6991	0.131131	Histone H1.2 (H1 VAR.1) (H1c)
P15864	Hist1h1c	H12_MOUSE	P15864_K46,P43277_K47	TB_24H-MOCK_24H	-0.886184	0.0781134	0.190731	no	-0.886184	0.190731	Histone H1.2 (H1 VAR.1) (H1c)
P15864	Hist1h1c	H12_MOUSE	P15864_K168	TB_24H-MOCK_24H	-1.30004	0.00495359	0.0241544	no	-1.30004	0.0241544	Histone H1.2 (H1 VAR.1) (H1c)
P15864	Hist1h1c	H12_MOUSE	P15864_K21	TB_24H-MOCK_24H	-0.0123393	0.982	0.988207	no	-0.0123393	0.988207	Histone H1.2 (H1 VAR.1) (H1c)
P15864	Hist1h1c	H12_MOUSE	P15864_K63,P43275_K65,P43274_K63,P43277_K64	TB_24H-MOCK_24H	-0.956558	0.0819802	0.198046	no	-0.956558	0.198046	Histone H1.2 (H1 VAR.1) (H1c)
P15864	Hist1h1c	H12_MOUSE	P15864_K52,P43274_K52,P43277_K53	TB_24H-MOCK_24H	-1.4924	0.0220211	0.0751788	no	-1.4924	0.0751788	Histone H1.2 (H1 VAR.1) (H1c)
P15919	Rag1	RAG1_MOUSE	P15919_K416	TB_24H-MOCK_24H	0.441293	0.705094	0.816371	no	0.441293	0.816371	V(D)J recombination-activating protein 1 (RAG-1) [Includes: Endonuclease RAG1 (EC 3.1.-.-); E3 ubiquitin-protein ligase RAG1 (EC 6.3.2.-)]
P16045	Lgals1	LEG1_MOUSE	P16045_K19	TB_24H-MOCK_24H	-0.0584076	0.908176	0.944978	no	-0.0584076	0.944978	Galectin-1 (Gal-1) (14 kDa lectin) (Beta-galactoside-binding lectin L-14-I) (Galaptin) (Lactose-binding lectin 1) (Lectin galactoside-binding soluble 1) (S-Lac lectin 1)
P16045	Lgals1	LEG1_MOUSE	P16045_K13	TB_24H-MOCK_24H	-0.471579	0.047805	0.13688	no	-0.471579	0.13688	Galectin-1 (Gal-1) (14 kDa lectin) (Beta-galactoside-binding lectin L-14-I) (Galaptin) (Lactose-binding lectin 1) (Lectin galactoside-binding soluble 1) (S-Lac lectin 1)
P16110	Lgals3	LEG3_MOUSE	P16110_K210	TB_24H-MOCK_24H	-1.17535	0.101457	0.233072	no	-1.17535	0.233072	Galectin-3 (Gal-3) (35 kDa lectin) (Carbohydrate-binding protein 35) (CBP 35) (Galactose-specific lectin 3) (IgE-binding protein) (L-34 galactoside-binding lectin) (Laminin-binding protein) (Lectin L-29) (Mac-2 antigen)
P16110	Lgals3	LEG3_MOUSE	P16110_K190	TB_24H-MOCK_24H	-0.10825	0.846875	0.911579	no	-0.10825	0.911579	Galectin-3 (Gal-3) (35 kDa lectin) (Carbohydrate-binding protein 35) (CBP 35) (Galactose-specific lectin 3) (IgE-binding protein) (L-34 galactoside-binding lectin) (Laminin-binding protein) (Lectin L-29) (Mac-2 antigen)
P16330	Cnp	CN37_MOUSE	P16330_K216	TB_24H-MOCK_24H	0.45926	0.342094	0.528619	no	0.45926	0.528619	2',3'-cyclic-nucleotide 3'-phosphodiesterase (CNP) (CNPase) (EC 3.1.4.37)
P16330	Cnp	CN37_MOUSE	P16330_K87	TB_24H-MOCK_24H	-0.390142	0.260295	0.44799	no	-0.390142	0.44799	2',3'-cyclic-nucleotide 3'-phosphodiesterase (CNP) (CNPase) (EC 3.1.4.37)
P16381	D1Pas1	DDX3L_MOUSE	P16381_K214,Q62167_K215,Q62095_K214	TB_24H-MOCK_24H	1.0387	0.00198209	0.0116055	no	1.0387	0.0116055	Putative ATP-dependent RNA helicase Pl10 (EC 3.6.4.13)
P16381	D1Pas1	DDX3L_MOUSE	P16381_K334,Q62167_K335,Q62095_K334	TB_24H-MOCK_24H	1.4617	2.67576e-06	4.59008e-05	no	1.4617	4.59008e-05	Putative ATP-dependent RNA helicase Pl10 (EC 3.6.4.13)
P16382	Il4r	IL4RA_MOUSE	P16382_K332	TB_24H-MOCK_24H	1.91504	6.57841e-06	9.26799e-05	no	1.91504	9.26799e-05	Interleukin-4 receptor subunit alpha (IL-4 receptor subunit alpha) (IL-4R subunit alpha) (IL-4R-alpha) (IL-4RA) (CD antigen CD124) [Cleaved into: Soluble interleukin-4 receptor subunit alpha (Soluble IL-4 receptor subunit alpha) (Soluble IL-4R-alpha) (sIL4Ralpha/prot) (IL-4-binding protein) (IL4-BP)]
P16382	Il4r	IL4RA_MOUSE	P16382_K316	TB_24H-MOCK_24H	0.427129	0.185049	0.356225	no	0.427129	0.356225	Interleukin-4 receptor subunit alpha (IL-4 receptor subunit alpha) (IL-4R subunit alpha) (IL-4R-alpha) (IL-4RA) (CD antigen CD124) [Cleaved into: Soluble interleukin-4 receptor subunit alpha (Soluble IL-4 receptor subunit alpha) (Soluble IL-4R-alpha) (sIL4Ralpha/prot) (IL-4-binding protein) (IL4-BP)]
P16460	Ass1	ASSY_MOUSE	P16460_K234	TB_24H-MOCK_24H	#NUM!		0	yes	5.58287	0.0117664	Argininosuccinate synthase (EC 6.3.4.5) (Citrulline--aspartate ligase)
P16627	Hspa1l	HS71L_MOUSE	Q61696_K159,P17879_K159,P16627_K161	TB_24H-MOCK_24H	#NUM!		0	yes	6.21837	0.0287908	Heat shock 70 kDa protein 1-like (Heat shock 70 kDa protein 1L) (Heat shock 70 kDa-like protein 1) (Spermatid-specific heat shock protein 70)
P16627	Hspa1l	HS71L_MOUSE	Q61696_K507,P17879_K507,P16627_K509,P63017_K507,P17156_K510	TB_24H-MOCK_24H	0.469538	0.308946	0.498321	no	0.469538	0.498321	Heat shock 70 kDa protein 1-like (Heat shock 70 kDa protein 1L) (Heat shock 70 kDa-like protein 1) (Spermatid-specific heat shock protein 70)
P16858	Gapdh	G3P_MOUSE	P16858_K111	TB_24H-MOCK_24H	0.68286	0.312812	0.502716	no	0.68286	0.502716	Glyceraldehyde-3-phosphate dehydrogenase (GAPDH) (EC 1.2.1.12) (Peptidyl-cysteine S-nitrosylase GAPDH) (EC 2.6.99.-)
P16858	Gapdh	G3P_MOUSE	P16858_K261	TB_24H-MOCK_24H	0.248626	0.63981	0.772862	no	0.248626	0.772862	Glyceraldehyde-3-phosphate dehydrogenase (GAPDH) (EC 1.2.1.12) (Peptidyl-cysteine S-nitrosylase GAPDH) (EC 2.6.99.-)
P16858	Gapdh	G3P_MOUSE	P16858_K3	TB_24H-MOCK_24H	1.28949	7.92647e-06	0.00010694	no	1.28949	0.00010694	Glyceraldehyde-3-phosphate dehydrogenase (GAPDH) (EC 1.2.1.12) (Peptidyl-cysteine S-nitrosylase GAPDH) (EC 2.6.99.-)
P16858	Gapdh	G3P_MOUSE	P16858_K257	TB_24H-MOCK_24H	-0.0513047	0.932313	0.958193	no	-0.0513047	0.958193	Glyceraldehyde-3-phosphate dehydrogenase (GAPDH) (EC 1.2.1.12) (Peptidyl-cysteine S-nitrosylase GAPDH) (EC 2.6.99.-)
P16858	Gapdh	G3P_MOUSE	P16858_K217	TB_24H-MOCK_24H	0.734878	0.0196193	0.0684955	no	0.734878	0.0684955	Glyceraldehyde-3-phosphate dehydrogenase (GAPDH) (EC 1.2.1.12) (Peptidyl-cysteine S-nitrosylase GAPDH) (EC 2.6.99.-)
P16858	Gapdh	G3P_MOUSE	P16858_K225	TB_24H-MOCK_24H	1.81062	8.10302e-06	0.0001075	no	1.81062	0.0001075	Glyceraldehyde-3-phosphate dehydrogenase (GAPDH) (EC 1.2.1.12) (Peptidyl-cysteine S-nitrosylase GAPDH) (EC 2.6.99.-)
P16858	Gapdh	G3P_MOUSE	P16858_K192	TB_24H-MOCK_24H	1.73942	6.25454e-05	0.000618462	no	1.73942	0.000618462	Glyceraldehyde-3-phosphate dehydrogenase (GAPDH) (EC 1.2.1.12) (Peptidyl-cysteine S-nitrosylase GAPDH) (EC 2.6.99.-)
P16858	Gapdh	G3P_MOUSE	P16858_K115	TB_24H-MOCK_24H	-0.565085	0.775179	0.861425	no	-0.565085	0.861425	Glyceraldehyde-3-phosphate dehydrogenase (GAPDH) (EC 1.2.1.12) (Peptidyl-cysteine S-nitrosylase GAPDH) (EC 2.6.99.-)
P16858	Gapdh	G3P_MOUSE	P16858_K143	TB_24H-MOCK_24H	2.64502	0.0322972	0.101816	no	2.64502	0.101816	Glyceraldehyde-3-phosphate dehydrogenase (GAPDH) (EC 1.2.1.12) (Peptidyl-cysteine S-nitrosylase GAPDH) (EC 2.6.99.-)
P16858	Gapdh	G3P_MOUSE	P16858_K213	TB_24H-MOCK_24H	1.86151	8.14065e-07	1.77548e-05	no	1.86151	1.77548e-05	Glyceraldehyde-3-phosphate dehydrogenase (GAPDH) (EC 1.2.1.12) (Peptidyl-cysteine S-nitrosylase GAPDH) (EC 2.6.99.-)
P16858	Gapdh	G3P_MOUSE	P16858_K59	TB_24H-MOCK_24H	#NUM!		0	yes	6.25385	0.0109908	Glyceraldehyde-3-phosphate dehydrogenase (GAPDH) (EC 1.2.1.12) (Peptidyl-cysteine S-nitrosylase GAPDH) (EC 2.6.99.-)
P17095	Hmga1	HMGA1_MOUSE	P17095_K7	TB_24H-MOCK_24H	-0.355249	0.37661	0.563499	no	-0.355249	0.563499	High mobility group protein HMG-I/HMG-Y (HMG-I(Y)) (High mobility group AT-hook protein 1) (High mobility group protein A1)
P17156	Hspa2	HSP72_MOUSE	P63017_K187,P17156_K188	TB_24H-MOCK_24H	0.224124	0.718859	0.827166	no	0.224124	0.827166	Heat shock-related 70 kDa protein 2 (Heat shock protein 70.2)
P17156	Hspa2	HSP72_MOUSE	P63017_K357,P17156_K360	TB_24H-MOCK_24H	#NUM!		0	yes	3.43582	0.0289918	Heat shock-related 70 kDa protein 2 (Heat shock protein 70.2)
P17156	Hspa2	HSP72_MOUSE	P63017_K325,P17156_K328	TB_24H-MOCK_24H	-0.0141178	0.975927	0.986461	no	-0.0141178	0.986461	Heat shock-related 70 kDa protein 2 (Heat shock protein 70.2)
P17182	Eno1	ENOA_MOUSE	P17182_K28,P17183_K28	TB_24H-MOCK_24H	1.1935	0.000579546	0.00409412	no	1.1935	0.00409412	Alpha-enolase (EC 4.2.1.11) (2-phospho-D-glycerate hydro-lyase) (Enolase 1) (Non-neural enolase) (NNE)
P17182	Eno1	ENOA_MOUSE	P17182_K126	TB_24H-MOCK_24H	0.494844	0.146355	0.30281	no	0.494844	0.30281	Alpha-enolase (EC 4.2.1.11) (2-phospho-D-glycerate hydro-lyase) (Enolase 1) (Non-neural enolase) (NNE)
P17182	Eno1	ENOA_MOUSE	P17182_K420	TB_24H-MOCK_24H	-0.19473	0.495399	0.668936	no	-0.19473	0.668936	Alpha-enolase (EC 4.2.1.11) (2-phospho-D-glycerate hydro-lyase) (Enolase 1) (Non-neural enolase) (NNE)
P17182	Eno1	ENOA_MOUSE	P17182_K434	TB_24H-MOCK_24H	#NUM!		0	yes	6.48304	0.0449399	Alpha-enolase (EC 4.2.1.11) (2-phospho-D-glycerate hydro-lyase) (Enolase 1) (Non-neural enolase) (NNE)
P17182	Eno1	ENOA_MOUSE	P17182_K335	TB_24H-MOCK_24H	-0.291989	0.307429	0.496634	no	-0.291989	0.496634	Alpha-enolase (EC 4.2.1.11) (2-phospho-D-glycerate hydro-lyase) (Enolase 1) (Non-neural enolase) (NNE)
P17182	Eno1	ENOA_MOUSE	P17182_K330	TB_24H-MOCK_24H	-0.598366	0.390094	0.57801	no	-0.598366	0.57801	Alpha-enolase (EC 4.2.1.11) (2-phospho-D-glycerate hydro-lyase) (Enolase 1) (Non-neural enolase) (NNE)
P17182	Eno1	ENOA_MOUSE	P17182_K60	TB_24H-MOCK_24H	1.70453	0.000107557	0.00100724	no	1.70453	0.00100724	Alpha-enolase (EC 4.2.1.11) (2-phospho-D-glycerate hydro-lyase) (Enolase 1) (Non-neural enolase) (NNE)
P17182	Eno1	ENOA_MOUSE	P17182_K81	TB_24H-MOCK_24H	0.198118	0.584559	0.731043	no	0.198118	0.731043	Alpha-enolase (EC 4.2.1.11) (2-phospho-D-glycerate hydro-lyase) (Enolase 1) (Non-neural enolase) (NNE)
P17182	Eno1	ENOA_MOUSE	P17182_K80	TB_24H-MOCK_24H	0.833052	0.0024757	0.0140761	no	0.833052	0.0140761	Alpha-enolase (EC 4.2.1.11) (2-phospho-D-glycerate hydro-lyase) (Enolase 1) (Non-neural enolase) (NNE)
P17182	Eno1	ENOA_MOUSE	P17182_K193	TB_24H-MOCK_24H	2.31355	0.000798337	0.00538539	no	2.31355	0.00538539	Alpha-enolase (EC 4.2.1.11) (2-phospho-D-glycerate hydro-lyase) (Enolase 1) (Non-neural enolase) (NNE)
P17225	Ptbp1	PTBP1_MOUSE	P17225_K13	TB_24H-MOCK_24H	-1.53835	0.00813853	0.0354973	no	-1.53835	0.0354973	Polypyrimidine tract-binding protein 1 (PTB) (Heterogeneous nuclear ribonucleoprotein I) (hnRNP I)
P17426	Ap2a1	AP2A1_MOUSE	P17427_K6,P17426_K6	TB_24H-MOCK_24H	0.355638	0.568038	0.721721	no	0.355638	0.721721	AP-2 complex subunit alpha-1 (100 kDa coated vesicle protein A) (Adaptor protein complex AP-2 subunit alpha-1) (Adaptor-related protein complex 2 subunit alpha-1) (Alpha-adaptin A) (Alpha1-adaptin) (Clathrin assembly protein complex 2 alpha-A large chain) (Plasma membrane adaptor HA2/AP2 adaptin alpha A subunit)
P17710	Hk1	HXK1_MOUSE	P17710_K389	TB_24H-MOCK_24H	1.25806	0.373528	0.560976	no	1.25806	0.560976	Hexokinase-1 (EC 2.7.1.1) (Hexokinase type I) (HK I) (Hexokinase, tumor isozyme)
P17710	Hk1	HXK1_MOUSE	P17710_K118	TB_24H-MOCK_24H	1.53797	0.0028629	0.0159004	no	1.53797	0.0159004	Hexokinase-1 (EC 2.7.1.1) (Hexokinase type I) (HK I) (Hexokinase, tumor isozyme)
P17710	Hk1	HXK1_MOUSE	P17710_K884	TB_24H-MOCK_24H	-0.0911327	0.609966	0.749858	no	-0.0911327	0.749858	Hexokinase-1 (EC 2.7.1.1) (Hexokinase type I) (HK I) (Hexokinase, tumor isozyme)
P17742	Ppia	PPIA_MOUSE	P17742_K44	TB_24H-MOCK_24H	-0.190743	0.505525	0.67347	no	-0.190743	0.67347	Peptidyl-prolyl cis-trans isomerase A (PPIase A) (EC 5.2.1.8) (Cyclophilin A) (Cyclosporin A-binding protein) (Rotamase A) (SP18) [Cleaved into: Peptidyl-prolyl cis-trans isomerase A, N-terminally processed]
P17742	Ppia	PPIA_MOUSE	P17742_K49	TB_24H-MOCK_24H	-0.669956	0.315507	0.504811	no	-0.669956	0.504811	Peptidyl-prolyl cis-trans isomerase A (PPIase A) (EC 5.2.1.8) (Cyclophilin A) (Cyclosporin A-binding protein) (Rotamase A) (SP18) [Cleaved into: Peptidyl-prolyl cis-trans isomerase A, N-terminally processed]
P17751	Tpi1	TPIS_MOUSE	P17751_K206	TB_24H-MOCK_24H	0.228688	0.693004	0.811222	no	0.228688	0.811222	Triosephosphate isomerase (TIM) (EC 5.3.1.1) (Triose-phosphate isomerase)
P17751	Tpi1	TPIS_MOUSE	P17751_K119	TB_24H-MOCK_24H	0.837047	0.0767539	0.18885	no	0.837047	0.18885	Triosephosphate isomerase (TIM) (EC 5.3.1.1) (Triose-phosphate isomerase)
P17751	Tpi1	TPIS_MOUSE	P17751_K64	TB_24H-MOCK_24H	0.628859	0.184859	0.356225	no	0.628859	0.356225	Triosephosphate isomerase (TIM) (EC 5.3.1.1) (Triose-phosphate isomerase)
P17751	Tpi1	TPIS_MOUSE	P17751_K238	TB_24H-MOCK_24H	1.45848	0.000262035	0.00211756	no	1.45848	0.00211756	Triosephosphate isomerase (TIM) (EC 5.3.1.1) (Triose-phosphate isomerase)
P17879	Hspa1b	HS71B_MOUSE	Q61696_K71,P17879_K71	TB_24H-MOCK_24H	#NUM!		0	yes	5.41299	0.0443246	Heat shock 70 kDa protein 1B (Heat shock 70 kDa protein 1) (HSP70.1)
P17879	Hspa1b	HS71B_MOUSE	Q61696_K56,P17879_K56	TB_24H-MOCK_24H	#NUM!		0	yes	6.69454	0.0203752	Heat shock 70 kDa protein 1B (Heat shock 70 kDa protein 1) (HSP70.1)
P17879	Hspa1b	HS71B_MOUSE	Q61696_K108,P17879_K108	TB_24H-MOCK_24H	#NUM!		0	yes	6.52091	0.0347308	Heat shock 70 kDa protein 1B (Heat shock 70 kDa protein 1) (HSP70.1)
P17918	Pcna	PCNA_MOUSE	P17918_K164	TB_24H-MOCK_24H	-1.10577	0.0554276	0.151617	no	-1.10577	0.151617	Proliferating cell nuclear antigen (PCNA) (Cyclin)
P17918	Pcna	PCNA_MOUSE	P17918_K168	TB_24H-MOCK_24H	-1.08477	0.0407521	0.12104	no	-1.08477	0.12104	Proliferating cell nuclear antigen (PCNA) (Cyclin)
P17918	Pcna	PCNA_MOUSE	P17918_K13	TB_24H-MOCK_24H	0.584022	0.0456089	0.132017	no	0.584022	0.132017	Proliferating cell nuclear antigen (PCNA) (Cyclin)
P17918	Pcna	PCNA_MOUSE	P17918_K248	TB_24H-MOCK_24H	-1.41318	0.0192802	0.0678202	no	-1.41318	0.0678202	Proliferating cell nuclear antigen (PCNA) (Cyclin)
P18242	Ctsd	CATD_MOUSE	P18242_K182	TB_24H-MOCK_24H	1.50126	0.000964297	0.00631754	no	1.50126	0.00631754	Cathepsin D (EC 3.4.23.5)
P18653	Rps6ka1	KS6A1_MOUSE	P18653_K551,Q9WUT3_K559,Q7TPS0_K590,P18654_K566	TB_24H-MOCK_24H	0.387903	0.318817	0.507557	no	0.387903	0.507557	Ribosomal protein S6 kinase alpha-1 (S6K-alpha-1) (EC 2.7.11.1) (90 kDa ribosomal protein S6 kinase 1) (p90-RSK 1) (p90RSK1) (p90S6K) (MAP kinase-activated protein kinase 1a) (MAPK-activated protein kinase 1a) (MAPKAP kinase 1a) (MAPKAPK-1a) (Ribosomal S6 kinase 1) (RSK-1)
P18653	Rps6ka1	KS6A1_MOUSE	P18653_K305	TB_24H-MOCK_24H	0.846621	0.0015876	0.0096468	no	0.846621	0.0096468	Ribosomal protein S6 kinase alpha-1 (S6K-alpha-1) (EC 2.7.11.1) (90 kDa ribosomal protein S6 kinase 1) (p90-RSK 1) (p90RSK1) (p90S6K) (MAP kinase-activated protein kinase 1a) (MAPK-activated protein kinase 1a) (MAPKAP kinase 1a) (MAPKAPK-1a) (Ribosomal S6 kinase 1) (RSK-1)
P18654	Rps6ka3	KS6A3_MOUSE	P18654_K322	TB_24H-MOCK_24H	2.35222	3.95177e-06	6.10797e-05	no	2.35222	6.10797e-05	Ribosomal protein S6 kinase alpha-3 (S6K-alpha-3) (EC 2.7.11.1) (90 kDa ribosomal protein S6 kinase 3) (p90-RSK 3) (p90RSK3) (MAP kinase-activated protein kinase 1b) (MAPK-activated protein kinase 1b) (MAPKAP kinase 1b) (MAPKAPK-1b) (Ribosomal S6 kinase 2) (RSK-2) (pp90RSK2)
P18760	Cfl1	COF1_MOUSE	P18760_K125,P45591_K125,Q9R0P5_K125	TB_24H-MOCK_24H	1.50685	0.00391116	0.0200857	no	1.50685	0.0200857	Cofilin-1 (Cofilin, non-muscle isoform)
P18760	Cfl1	COF1_MOUSE	P18760_K121,P45591_K121,Q9R0P5_K121	TB_24H-MOCK_24H	-0.215229	0.518242	0.682749	no	-0.215229	0.682749	Cofilin-1 (Cofilin, non-muscle isoform)
P18760	Cfl1	COF1_MOUSE	P18760_K19,P45591_K19	TB_24H-MOCK_24H	0.0965544	0.802727	0.884148	no	0.0965544	0.884148	Cofilin-1 (Cofilin, non-muscle isoform)
P18760	Cfl1	COF1_MOUSE	P18760_K30	TB_24H-MOCK_24H	-0.633022	0.22341	0.403252	no	-0.633022	0.403252	Cofilin-1 (Cofilin, non-muscle isoform)
P19096	Fasn	FAS_MOUSE	P19096_K1152	TB_24H-MOCK_24H	-0.449519	0.0797468	0.193532	no	-0.449519	0.193532	Fatty acid synthase (EC 2.3.1.85) [Includes: [Acyl-carrier-protein] S-acetyltransferase (EC 2.3.1.38); [Acyl-carrier-protein] S-malonyltransferase (EC 2.3.1.39); 3-oxoacyl-[acyl-carrier-protein] synthase (EC 2.3.1.41); 3-oxoacyl-[acyl-carrier-protein] reductase (EC 1.1.1.100); 3-hydroxyacyl-[acyl-carrier-protein] dehydratase (EC 4.2.1.59); Enoyl-[acyl-carrier-protein] reductase (EC 1.3.1.39); Ole…
P19253	Rpl13a	RL13A_MOUSE	P19253_K191	TB_24H-MOCK_24H	0.548795	0.532282	0.692315	no	0.548795	0.692315	60S ribosomal protein L13a (Transplantation antigen P198) (Tum-P198 antigen)
P19253	Rpl13a	RL13A_MOUSE	P19253_K125	TB_24H-MOCK_24H	0.373141	0.439403	0.621251	no	0.373141	0.621251	60S ribosomal protein L13a (Transplantation antigen P198) (Tum-P198 antigen)
P20152	Vim	VIME_MOUSE	P20152_K445	TB_24H-MOCK_24H	0.599879	0.310821	0.500838	no	0.599879	0.500838	Vimentin
P20152	Vim	VIME_MOUSE	P20152_K143	TB_24H-MOCK_24H	0.554448	0.44452	0.626124	no	0.554448	0.626124	Vimentin
P20152	Vim	VIME_MOUSE	P20152_K129	TB_24H-MOCK_24H	#NUM!		0	yes	5.02796	0.0419	Vimentin
P20152	Vim	VIME_MOUSE	P20152_K168	TB_24H-MOCK_24H	0.298633	0.571703	0.723491	no	0.298633	0.723491	Vimentin
P20152	Vim	VIME_MOUSE	P20152_K236	TB_24H-MOCK_24H	#NUM!		0	yes	5.66136	0.0422984	Vimentin
P20152	Vim	VIME_MOUSE	P20152_K139	TB_24H-MOCK_24H	1.85215	0.00497103	0.0241544	no	1.85215	0.0241544	Vimentin
P20152	Vim	VIME_MOUSE	P20152_K120	TB_24H-MOCK_24H	0.762583	0.283714	0.471504	no	0.762583	0.471504	Vimentin
P20152	Vim	VIME_MOUSE	P20152_K334	TB_24H-MOCK_24H	0.0625045	0.887894	0.934872	no	0.0625045	0.934872	Vimentin
P20152	Vim	VIME_MOUSE	P20152_K235	TB_24H-MOCK_24H	-0.439532	0.353604	0.539299	no	-0.439532	0.539299	Vimentin
P20152	Vim	VIME_MOUSE	P20152_K439	TB_24H-MOCK_24H	0.0987906	0.831839	0.899652	no	0.0987906	0.899652	Vimentin
P20491	Fcer1g	FCERG_MOUSE	P20491_K80	TB_24H-MOCK_24H	0.307428	0.643442	0.775675	no	0.307428	0.775675	High affinity immunoglobulin epsilon receptor subunit gamma (Fc receptor gamma-chain) (FcRgamma) (Fc-epsilon RI-gamma) (IgE Fc receptor subunit gamma) (FceRI gamma)
P20491	Fcer1g	FCERG_MOUSE	P20491_K83	TB_24H-MOCK_24H	1.15589	0.263653	0.451815	no	1.15589	0.451815	High affinity immunoglobulin epsilon receptor subunit gamma (Fc receptor gamma-chain) (FcRgamma) (Fc-epsilon RI-gamma) (IgE Fc receptor subunit gamma) (FceRI gamma)
P20934	Evi2a	EVI2A_MOUSE	P20934_K192	TB_24H-MOCK_24H	-0.221922	0.579067	0.728179	no	-0.221922	0.728179	Protein EVI2A (Ecotropic viral integration site 2A protein) (EVI-2A)
P21300	Akr1b7	ALD1_MOUSE	P45377_K12,P21300_K12	TB_24H-MOCK_24H	-0.132696	0.768408	0.860391	no	-0.132696	0.860391	Aldose reductase-related protein 1 (EC 1.1.1.21) (Aldehyde reductase) (AR) (Aldo-keto reductase family 1 member B7) (MVDP) (Vas deferens androgen-dependent protein)
P21958	Tap1	TAP1_MOUSE	P21958_K365	TB_24H-MOCK_24H	#NUM!		0	yes	6.24706	0.0331526	Antigen peptide transporter 1 (APT1) (ATP-binding cassette sub-family B member 2) (Histocompatibility antigen modifier 1) (Peptide transporter TAP1)
P21958	Tap1	TAP1_MOUSE	P21958_K254	TB_24H-MOCK_24H	#NUM!		0	yes	3.49343	0.0417596	Antigen peptide transporter 1 (APT1) (ATP-binding cassette sub-family B member 2) (Histocompatibility antigen modifier 1) (Peptide transporter TAP1)
P21958	Tap1	TAP1_MOUSE	P21958_K707	TB_24H-MOCK_24H	0.731133	0.129704	0.277912	no	0.731133	0.277912	Antigen peptide transporter 1 (APT1) (ATP-binding cassette sub-family B member 2) (Histocompatibility antigen modifier 1) (Peptide transporter TAP1)
P21981	Tgm2	TGM2_MOUSE	P21981_K425	TB_24H-MOCK_24H	2.31923	2.06235e-05	0.000234519	no	2.31923	0.000234519	Protein-glutamine gamma-glutamyltransferase 2 (EC 2.3.2.13) (Tissue transglutaminase) (Transglutaminase C) (TG(C)) (TGC) (TGase C) (Transglutaminase-2) (TGase-2)
P21981	Tgm2	TGM2_MOUSE	P21981_K561	TB_24H-MOCK_24H	#NUM!		0	yes	3.73496	0.0309925	Protein-glutamine gamma-glutamyltransferase 2 (EC 2.3.2.13) (Tissue transglutaminase) (Transglutaminase C) (TG(C)) (TGC) (TGase C) (Transglutaminase-2) (TGase-2)
P21981	Tgm2	TGM2_MOUSE	P21981_K671	TB_24H-MOCK_24H	-0.30854	0.334708	0.522789	no	-0.30854	0.522789	Protein-glutamine gamma-glutamyltransferase 2 (EC 2.3.2.13) (Tissue transglutaminase) (Transglutaminase C) (TG(C)) (TGC) (TGase C) (Transglutaminase-2) (TGase-2)
P21981	Tgm2	TGM2_MOUSE	P21981_K74	TB_24H-MOCK_24H	#NUM!		0	yes	3.7471	0.0278695	Protein-glutamine gamma-glutamyltransferase 2 (EC 2.3.2.13) (Tissue transglutaminase) (Transglutaminase C) (TG(C)) (TGC) (TGase C) (Transglutaminase-2) (TGase-2)
P21981	Tgm2	TGM2_MOUSE	P21981_K414	TB_24H-MOCK_24H	#NUM!		0	yes	3.47877	0.0493431	Protein-glutamine gamma-glutamyltransferase 2 (EC 2.3.2.13) (Tissue transglutaminase) (Transglutaminase C) (TG(C)) (TGC) (TGase C) (Transglutaminase-2) (TGase-2)
P21995	Emb	EMB_MOUSE	P21995_K138	TB_24H-MOCK_24H	0.582939	0.373866	0.560976	no	0.582939	0.560976	Embigin (Teratocarcinoma glycoprotein Gp-70)
P22682	Cbl	CBL_MOUSE	P22682_K519	TB_24H-MOCK_24H	-0.0861328	0.879305	0.929518	no	-0.0861328	0.929518	E3 ubiquitin-protein ligase CBL (EC 6.3.2.-) (Casitas B-lineage lymphoma proto-oncogene) (Proto-oncogene c-Cbl) (Signal transduction protein CBL)
P23116	Eif3a	EIF3A_MOUSE	P23116_K75	TB_24H-MOCK_24H	2.05681	0.00938222	0.0397247	no	2.05681	0.0397247	Eukaryotic translation initiation factor 3 subunit A (eIF3a) (Centrosomin) (Eukaryotic translation initiation factor 3 subunit 10) (eIF-3-theta) (eIF3 p167) (eIF3 p180) (eIF3 p185) (p162)
P23116	Eif3a	EIF3A_MOUSE	P23116_K775	TB_24H-MOCK_24H	-1.17394	0.0219057	0.0749975	no	-1.17394	0.0749975	Eukaryotic translation initiation factor 3 subunit A (eIF3a) (Centrosomin) (Eukaryotic translation initiation factor 3 subunit 10) (eIF-3-theta) (eIF3 p167) (eIF3 p180) (eIF3 p185) (p162)
P23249	Mov10	MOV10_MOUSE	P23249_K71	TB_24H-MOCK_24H	-0.539389	0.253085	0.440645	no	-0.539389	0.440645	Putative helicase MOV-10 (EC 3.6.4.13) (Moloney leukemia virus 10 protein)
P23249	Mov10	MOV10_MOUSE	P23249_K101	TB_24H-MOCK_24H	#NUM!		0	yes	3.10914	0.0472976	Putative helicase MOV-10 (EC 3.6.4.13) (Moloney leukemia virus 10 protein)
P23249	Mov10	MOV10_MOUSE	P23249_K509	TB_24H-MOCK_24H	#NUM!		0	yes	6.35752	0.0229279	Putative helicase MOV-10 (EC 3.6.4.13) (Moloney leukemia virus 10 protein)
P23249	Mov10	MOV10_MOUSE	P23249_K818	TB_24H-MOCK_24H	2.10041	7.18426e-06	9.94552e-05	no	2.10041	9.94552e-05	Putative helicase MOV-10 (EC 3.6.4.13) (Moloney leukemia virus 10 protein)
P23249	Mov10	MOV10_MOUSE	P23249_K490	TB_24H-MOCK_24H	#NUM!		0	yes	4.11333	0.0307755	Putative helicase MOV-10 (EC 3.6.4.13) (Moloney leukemia virus 10 protein)
P23336	Ggta1	GGTA1_MOUSE	P23336_K19	TB_24H-MOCK_24H	#NUM!		0	yes	3.00908	0.0282563	N-acetyllactosaminide alpha-1,3-galactosyltransferase (EC 2.4.1.87) (UDP-galactose:beta-D-galactosyl-1,4-N-acetyl-D-glucosaminide alpha-1,3-galactosyltransferase) (Galactosyltransferase)
P23492	Pnp	PNPH_MOUSE	P23492_K95	TB_24H-MOCK_24H	0.696125	0.0301801	0.096286	no	0.696125	0.096286	Purine nucleoside phosphorylase (PNP) (EC 2.4.2.1) (Inosine phosphorylase) (Inosine-guanosine phosphorylase)
P24270	Cat	CATA_MOUSE	P24270_K243	TB_24H-MOCK_24H	1.41666	0.116426	0.253908	no	1.41666	0.253908	Catalase (EC 1.11.1.6)
P25322	Ccnd1	CCND1_MOUSE	P25322_K46	TB_24H-MOCK_24H	-1.5299	2.35925e-05	0.000260828	no	-1.5299	0.000260828	G1/S-specific cyclin-D1
P25444	Rps2	RS2_MOUSE	P25444_K275	TB_24H-MOCK_24H	-0.595359	0.448498	0.628955	no	-0.595359	0.628955	40S ribosomal protein S2 (40S ribosomal protein S4) (Protein LLRep3)
P25444	Rps2	RS2_MOUSE	P25444_K176	TB_24H-MOCK_24H	0.886902	0.108812	0.241603	no	0.886902	0.241603	40S ribosomal protein S2 (40S ribosomal protein S4) (Protein LLRep3)
P25444	Rps2	RS2_MOUSE	P25444_K263	TB_24H-MOCK_24H	0.132155	0.785669	0.868601	no	0.132155	0.868601	40S ribosomal protein S2 (40S ribosomal protein S4) (Protein LLRep3)
P25911	Lyn	LYN_MOUSE	P25911_K20	TB_24H-MOCK_24H	0.733783	0.406269	0.590128	no	0.733783	0.590128	Tyrosine-protein kinase Lyn (EC 2.7.10.2) (V-yes-1 Yamaguchi sarcoma viral related oncogene homolog) (p53Lyn) (p56Lyn)
P26039	Tln1	TLN1_MOUSE	P26039_K687	TB_24H-MOCK_24H	-0.0557638	0.935742	0.959859	no	-0.0557638	0.959859	Talin-1
P26039	Tln1	TLN1_MOUSE	P26039_K1541,Q71LX4_K1544	TB_24H-MOCK_24H	-0.475384	0.158151	0.320509	no	-0.475384	0.320509	Talin-1
P26039	Tln1	TLN1_MOUSE	P26039_K685	TB_24H-MOCK_24H	0.719741	0.191879	0.364776	no	0.719741	0.364776	Talin-1
P26039	Tln1	TLN1_MOUSE	P26039_K2024	TB_24H-MOCK_24H	#NUM!		0	yes	2.78169	0.0331923	Talin-1
P26039	Tln1	TLN1_MOUSE	P26039_K441	TB_24H-MOCK_24H	-1.41904	0.108121	0.241415	no	-1.41904	0.241415	Talin-1
P26039	Tln1	TLN1_MOUSE	P26039_K428	TB_24H-MOCK_24H	-1.20271	0.0573552	0.154337	no	-1.20271	0.154337	Talin-1
P26040	Ezr	EZRI_MOUSE	P26040_K79	TB_24H-MOCK_24H	2.84465	2.24793e-05	0.00025125	no	2.84465	0.00025125	Ezrin (Cytovillin) (Villin-2) (p81)
P26040	Ezr	EZRI_MOUSE	P26041_K258,P26040_K258,P26043_K258	TB_24H-MOCK_24H	1.46638	0.0645866	0.167736	no	1.46638	0.167736	Ezrin (Cytovillin) (Villin-2) (p81)
P26041	Msn	MOES_MOUSE	P26041_K151	TB_24H-MOCK_24H	1.15116	0.00322045	0.0176184	no	1.15116	0.0176184	Moesin (Membrane-organizing extension spike protein)
P26041	Msn	MOES_MOUSE	P26041_K3	TB_24H-MOCK_24H	0.131325	0.819872	0.895352	no	0.131325	0.895352	Moesin (Membrane-organizing extension spike protein)
P26041	Msn	MOES_MOUSE	P26041_K79	TB_24H-MOCK_24H	0.887114	0.0136131	0.0526572	no	0.887114	0.0526572	Moesin (Membrane-organizing extension spike protein)
P26041	Msn	MOES_MOUSE	P26041_K352	TB_24H-MOCK_24H	-1.27939	0.00273279	0.015319	no	-1.27939	0.015319	Moesin (Membrane-organizing extension spike protein)
P26041	Msn	MOES_MOUSE	P26041_K60	TB_24H-MOCK_24H	2.94166	7.89257e-06	0.00010694	no	2.94166	0.00010694	Moesin (Membrane-organizing extension spike protein)
P26043	Rdx	RADI_MOUSE	P26043_K79	TB_24H-MOCK_24H	-0.537096	0.435642	0.618682	no	-0.537096	0.618682	Radixin (ESP10)
P26151	Fcgr1	FCGR1_MOUSE	P26151_K343	TB_24H-MOCK_24H	0.961208	0.162361	0.326775	no	0.961208	0.326775	High affinity immunoglobulin gamma Fc receptor I (IgG Fc receptor I) (Fc-gamma RI) (FcRI) (CD antigen CD64)
P26151	Fcgr1	FCGR1_MOUSE	P26151_K344	TB_24H-MOCK_24H	2.3098	1.11619e-06	2.3693e-05	no	2.3098	2.3693e-05	High affinity immunoglobulin gamma Fc receptor I (IgG Fc receptor I) (Fc-gamma RI) (FcRI) (CD antigen CD64)
P26516	Psmd7	PSMD7_MOUSE	P26516_K46	TB_24H-MOCK_24H	-0.00502708	0.989385	0.993128	no	-0.00502708	0.993128	26S proteasome non-ATPase regulatory subunit 7 (26S proteasome regulatory subunit RPN8) (26S proteasome regulatory subunit S12) (Mov34 protein) (Proteasome subunit p40)
P26516	Psmd7	PSMD7_MOUSE	P26516_K45	TB_24H-MOCK_24H	#NUM!		0	yes	6.20943	0.011443	26S proteasome non-ATPase regulatory subunit 7 (26S proteasome regulatory subunit RPN8) (26S proteasome regulatory subunit S12) (Mov34 protein) (Proteasome subunit p40)
P27612	Plaa	PLAP_MOUSE	P27612_K651	TB_24H-MOCK_24H	0.694219	0.131501	0.281007	no	0.694219	0.281007	Phospholipase A-2-activating protein (PLA2P) (PLAP)
P27612	Plaa	PLAP_MOUSE	P27612_K176	TB_24H-MOCK_24H	0.479177	0.381359	0.568468	no	0.479177	0.568468	Phospholipase A-2-activating protein (PLA2P) (PLAP)
P27659	Rpl3	RL3_MOUSE	P27659_K286	TB_24H-MOCK_24H	-0.692826	0.0538339	0.148604	no	-0.692826	0.148604	60S ribosomal protein L3 (J1 protein)
P27659	Rpl3	RL3_MOUSE	P27659_K294	TB_24H-MOCK_24H	0.587474	0.184833	0.356225	no	0.587474	0.356225	60S ribosomal protein L3 (J1 protein)
P27661	H2afx	H2AX_MOUSE	P27661_K120	TB_24H-MOCK_24H	-0.581218	0.461369	0.641485	no	-0.581218	0.641485	Histone H2AX (H2a/x) (Histone H2A.X)
P27773	Pdia3	PDIA3_MOUSE	P27773_K129	TB_24H-MOCK_24H	#NUM!		0	yes	3.39873	0.0378008	Protein disulfide-isomerase A3 (EC 5.3.4.1) (58 kDa glucose-regulated protein) (58 kDa microsomal protein) (p58) (Disulfide isomerase ER-60) (Endoplasmic reticulum resident protein 57) (ER protein 57) (ERp57) (Endoplasmic reticulum resident protein 60) (ER protein 60) (ERp60)
P27773	Pdia3	PDIA3_MOUSE	P27773_K75	TB_24H-MOCK_24H	-0.275328	0.425113	0.609712	no	-0.275328	0.609712	Protein disulfide-isomerase A3 (EC 5.3.4.1) (58 kDa glucose-regulated protein) (58 kDa microsomal protein) (p58) (Disulfide isomerase ER-60) (Endoplasmic reticulum resident protein 57) (ER protein 57) (ERp57) (Endoplasmic reticulum resident protein 60) (ER protein 60) (ERp60)
P27870	Vav1	VAV_MOUSE	P27870_K410	TB_24H-MOCK_24H	#NUM!		0	yes	3.88963	0.0448134	Proto-oncogene vav (p95vav)
P27870	Vav1	VAV_MOUSE	P27870_K788	TB_24H-MOCK_24H	#NUM!		0	yes	4.9896	0.0269429	Proto-oncogene vav (p95vav)
P28271	Aco1	ACOC_MOUSE	P28271_K464	TB_24H-MOCK_24H	0.774142	0.240049	0.42604	no	0.774142	0.42604	Cytoplasmic aconitate hydratase (Aconitase) (EC 4.2.1.3) (Citrate hydro-lyase) (Iron regulatory protein 1) (IRP1) (Iron-responsive element-binding protein 1) (IRE-BP 1)
P28271	Aco1	ACOC_MOUSE	P28271_K79	TB_24H-MOCK_24H	-0.323585	0.338605	0.525912	no	-0.323585	0.525912	Cytoplasmic aconitate hydratase (Aconitase) (EC 4.2.1.3) (Citrate hydro-lyase) (Iron regulatory protein 1) (IRP1) (Iron-responsive element-binding protein 1) (IRE-BP 1)
P28867	Prkcd	KPCD_MOUSE	P28867_K355	TB_24H-MOCK_24H	#NUM!		0	yes	5.43165	0.0220499	Protein kinase C delta type (EC 2.7.11.13) (Tyrosine-protein kinase PRKCD) (EC 2.7.10.2) (nPKC-delta) [Cleaved into: Protein kinase C delta type regulatory subunit; Protein kinase C delta type catalytic subunit (Sphingosine-dependent protein kinase-1) (SDK1)]
P28867	Prkcd	KPCD_MOUSE	P28867_K494	TB_24H-MOCK_24H	#NUM!		0	yes	3.11901	0.0368111	Protein kinase C delta type (EC 2.7.11.13) (Tyrosine-protein kinase PRKCD) (EC 2.7.10.2) (nPKC-delta) [Cleaved into: Protein kinase C delta type regulatory subunit; Protein kinase C delta type catalytic subunit (Sphingosine-dependent protein kinase-1) (SDK1)]
P28867	Prkcd	KPCD_MOUSE	P28867_K222	TB_24H-MOCK_24H	-0.363137	0.25012	0.437572	no	-0.363137	0.437572	Protein kinase C delta type (EC 2.7.11.13) (Tyrosine-protein kinase PRKCD) (EC 2.7.10.2) (nPKC-delta) [Cleaved into: Protein kinase C delta type regulatory subunit; Protein kinase C delta type catalytic subunit (Sphingosine-dependent protein kinase-1) (SDK1)]
P29341	Pabpc1	PABP1_MOUSE	P29341_K188	TB_24H-MOCK_24H	-1.02171	0.0127352	0.0508871	no	-1.02171	0.0508871	Polyadenylate-binding protein 1 (PABP-1) (Poly(A)-binding protein 1)
P29341	Pabpc1	PABP1_MOUSE	P29341_K80	TB_24H-MOCK_24H	#NUM!		0	yes	3.6252	0.0426854	Polyadenylate-binding protein 1 (PABP-1) (Poly(A)-binding protein 1)
P29341	Pabpc1	PABP1_MOUSE	P29341_K78	TB_24H-MOCK_24H	-0.0781132	0.870273	0.925598	no	-0.0781132	0.925598	Polyadenylate-binding protein 1 (PABP-1) (Poly(A)-binding protein 1)
P29351	Ptpn6	PTN6_MOUSE	P29351_K308	TB_24H-MOCK_24H	2.03307	4.48655e-05	0.000463804	no	2.03307	0.000463804	Tyrosine-protein phosphatase non-receptor type 6 (EC 3.1.3.48) (70Z-SHP) (Hematopoietic cell protein-tyrosine phosphatase) (PTPTY-42) (Protein-tyrosine phosphatase 1C) (PTP-1C) (SH-PTP1) (SHP-1)
P29351	Ptpn6	PTN6_MOUSE	P29351_K19	TB_24H-MOCK_24H	1.03113	0.00224821	0.0129211	no	1.03113	0.0129211	Tyrosine-protein phosphatase non-receptor type 6 (EC 3.1.3.48) (70Z-SHP) (Hematopoietic cell protein-tyrosine phosphatase) (PTPTY-42) (Protein-tyrosine phosphatase 1C) (PTP-1C) (SH-PTP1) (SHP-1)
P29351	Ptpn6	PTN6_MOUSE	P29351_K391	TB_24H-MOCK_24H	2.41261	0.00116934	0.00744634	no	2.41261	0.00744634	Tyrosine-protein phosphatase non-receptor type 6 (EC 3.1.3.48) (70Z-SHP) (Hematopoietic cell protein-tyrosine phosphatase) (PTPTY-42) (Protein-tyrosine phosphatase 1C) (PTP-1C) (SH-PTP1) (SHP-1)
P29477	Nos2	NOS2_MOUSE	P29477_K724	TB_24H-MOCK_24H	1.59763	0.115883	0.253415	no	1.59763	0.253415	Nitric oxide synthase, inducible (EC 1.14.13.39) (Inducible NO synthase) (Inducible NOS) (iNOS) (Macrophage NOS) (MAC-NOS) (NOS type II) (Peptidyl-cysteine S-nitrosylase NOS2)
P29477	Nos2	NOS2_MOUSE	P29477_K105	TB_24H-MOCK_24H	#NUM!		0	yes	5.13682	0.0217755	Nitric oxide synthase, inducible (EC 1.14.13.39) (Inducible NO synthase) (Inducible NOS) (iNOS) (Macrophage NOS) (MAC-NOS) (NOS type II) (Peptidyl-cysteine S-nitrosylase NOS2)
P29477	Nos2	NOS2_MOUSE	P29477_K19	TB_24H-MOCK_24H	#NUM!		0	yes	3.41756	0.0304477	Nitric oxide synthase, inducible (EC 1.14.13.39) (Inducible NO synthase) (Inducible NOS) (iNOS) (Macrophage NOS) (MAC-NOS) (NOS type II) (Peptidyl-cysteine S-nitrosylase NOS2)
P29477	Nos2	NOS2_MOUSE	P29477_K732	TB_24H-MOCK_24H	#NUM!		0	yes	6.01602	0.0163973	Nitric oxide synthase, inducible (EC 1.14.13.39) (Inducible NO synthase) (Inducible NOS) (iNOS) (Macrophage NOS) (MAC-NOS) (NOS type II) (Peptidyl-cysteine S-nitrosylase NOS2)
P29477	Nos2	NOS2_MOUSE	P29477_K741	TB_24H-MOCK_24H	#NUM!		0	yes	5.06898	0.0451349	Nitric oxide synthase, inducible (EC 1.14.13.39) (Inducible NO synthase) (Inducible NOS) (iNOS) (Macrophage NOS) (MAC-NOS) (NOS type II) (Peptidyl-cysteine S-nitrosylase NOS2)
P29595	Nedd8	NEDD8_MOUSE	P29595_K54	TB_24H-MOCK_24H	-0.560298	0.166249	0.331633	no	-0.560298	0.331633	NEDD8 (Neddylin) (Neural precursor cell expressed developmentally down-regulated protein 8) (NEDD-8) (Ubiquitin-like protein Nedd8)
P29595	Nedd8	NEDD8_MOUSE	P29595_K48	TB_24H-MOCK_24H	-0.701355	0.11176	0.246429	no	-0.701355	0.246429	NEDD8 (Neddylin) (Neural precursor cell expressed developmentally down-regulated protein 8) (NEDD-8) (Ubiquitin-like protein Nedd8)
P29595	Nedd8	NEDD8_MOUSE	P29595_K11	TB_24H-MOCK_24H	-0.767067	0.0716035	0.179516	no	-0.767067	0.179516	NEDD8 (Neddylin) (Neural precursor cell expressed developmentally down-regulated protein 8) (NEDD-8) (Ubiquitin-like protein Nedd8)
P30204	Msr1	MSRE_MOUSE	P30204_K3	TB_24H-MOCK_24H	3.34702	0.000920286	0.00605411	no	3.34702	0.00605411	Macrophage scavenger receptor types I and II (Macrophage acetylated LDL receptor I and II) (Scavenger receptor type A) (SR-A) (CD antigen CD204)
P30204	Msr1	MSRE_MOUSE	P30204_K27	TB_24H-MOCK_24H	0.529597	0.489061	0.666027	no	0.529597	0.666027	Macrophage scavenger receptor types I and II (Macrophage acetylated LDL receptor I and II) (Scavenger receptor type A) (SR-A) (CD antigen CD204)
P30993	C5ar1	C5AR1_MOUSE	P30993_K334	TB_24H-MOCK_24H	-0.739344	0.0524277	0.147416	no	-0.739344	0.147416	C5a anaphylatoxin chemotactic receptor 1 (C5a anaphylatoxin chemotactic receptor) (C5a-R) (C5aR) (CD antigen CD88)
P30999	Ctnnd1	CTND1_MOUSE	P30999_K728	TB_24H-MOCK_24H	0.803157	0.000106428	0.00100256	no	0.803157	0.00100256	Catenin delta-1 (Cadherin-associated Src substrate) (CAS) (p120 catenin) (p120(ctn)) (p120(cas))
P31230	Aimp1	AIMP1_MOUSE	P31230_K9	TB_24H-MOCK_24H	0.683915	0.0100431	0.0420751	no	0.683915	0.0420751	Aminoacyl tRNA synthase complex-interacting multifunctional protein 1 (Multisynthase complex auxiliary component p43) [Cleaved into: Endothelial monocyte-activating polypeptide 2 (EMAP-2) (Endothelial monocyte-activating polypeptide II) (EMAP-II) (Small inducible cytokine subfamily E member 1)]
P31230	Aimp1	AIMP1_MOUSE	P31230_K47	TB_24H-MOCK_24H	#NUM!		0	yes	-2.63208	0.0173487	Aminoacyl tRNA synthase complex-interacting multifunctional protein 1 (Multisynthase complex auxiliary component p43) [Cleaved into: Endothelial monocyte-activating polypeptide 2 (EMAP-2) (Endothelial monocyte-activating polypeptide II) (EMAP-II) (Small inducible cytokine subfamily E member 1)]
P31254	Uba1y	UBA1Y_MOUSE	Q02053_K593,P31254_K592	TB_24H-MOCK_24H	0.242477	0.651244	0.780604	no	0.242477	0.780604	Ubiquitin-like modifier-activating enzyme 1 Y (EC 6.2.1.45) (Ubiquitin-activating enzyme E1) (Ubiquitin-activating enzyme E1 Y)
P31254	Uba1y	UBA1Y_MOUSE	Q02053_K470,P31254_K469	TB_24H-MOCK_24H	0.145395	0.765351	0.860391	no	0.145395	0.860391	Ubiquitin-like modifier-activating enzyme 1 Y (EC 6.2.1.45) (Ubiquitin-activating enzyme E1) (Ubiquitin-activating enzyme E1 Y)
P31254	Uba1y	UBA1Y_MOUSE	Q02053_K884,P31254_K884	TB_24H-MOCK_24H	-0.448534	0.50879	0.673872	no	-0.448534	0.673872	Ubiquitin-like modifier-activating enzyme 1 Y (EC 6.2.1.45) (Ubiquitin-activating enzyme E1) (Ubiquitin-activating enzyme E1 Y)
P31938	Map2k1	MP2K1_MOUSE	P31938_K192,Q63932_K196	TB_24H-MOCK_24H	0.93481	0.222953	0.402885	no	0.93481	0.402885	Dual specificity mitogen-activated protein kinase kinase 1 (MAP kinase kinase 1) (MAPKK 1) (EC 2.7.12.2) (ERK activator kinase 1) (MAPK/ERK kinase 1) (MEK 1)
P31938	Map2k1	MP2K1_MOUSE	P31938_K175	TB_24H-MOCK_24H	2.87403	4.39755e-06	6.54289e-05	no	2.87403	6.54289e-05	Dual specificity mitogen-activated protein kinase kinase 1 (MAP kinase kinase 1) (MAPKK 1) (EC 2.7.12.2) (ERK activator kinase 1) (MAPK/ERK kinase 1) (MEK 1)
P32883	Kras	RASK_MOUSE	P32883_K128	TB_24H-MOCK_24H	-0.319574	0.501399	0.67347	no	-0.319574	0.67347	GTPase KRas (K-Ras 2) (Ki-Ras) (c-K-ras) (c-Ki-ras) [Cleaved into: GTPase KRas, N-terminally processed]
P34884	Mif	MIF_MOUSE	P34884_K78	TB_24H-MOCK_24H	-1.10478	0.0159504	0.0590535	no	-1.10478	0.0590535	Macrophage migration inhibitory factor (MIF) (EC 5.3.2.1) (Delayed early response protein 6) (DER6) (Glycosylation-inhibiting factor) (GIF) (L-dopachrome isomerase) (L-dopachrome tautomerase) (EC 5.3.3.12) (Phenylpyruvate tautomerase)
P35123	Usp4	UBP4_MOUSE	P35123_K825	TB_24H-MOCK_24H	1.31916	0.000102882	0.000974929	no	1.31916	0.000974929	Ubiquitin carboxyl-terminal hydrolase 4 (EC 3.4.19.12) (Deubiquitinating enzyme 4) (Ubiquitin thioesterase 4) (Ubiquitin-specific-processing protease 4) (Ubiquitous nuclear protein)
P35123	Usp4	UBP4_MOUSE	P35123_K769	TB_24H-MOCK_24H	-0.58147	0.0908564	0.213796	no	-0.58147	0.213796	Ubiquitin carboxyl-terminal hydrolase 4 (EC 3.4.19.12) (Deubiquitinating enzyme 4) (Ubiquitin thioesterase 4) (Ubiquitin-specific-processing protease 4) (Ubiquitous nuclear protein)
P35278	Rab5c	RAB5C_MOUSE	P35278_K135	TB_24H-MOCK_24H	1.37334	0.0176226	0.06333	no	1.37334	0.06333	Ras-related protein Rab-5C
P35278	Rab5c	RAB5C_MOUSE	P35278_K117,Q9CQD1_K116	TB_24H-MOCK_24H	0.146466	0.804741	0.885382	no	0.146466	0.885382	Ras-related protein Rab-5C
P35278	Rab5c	RAB5C_MOUSE	P35278_K141	TB_24H-MOCK_24H	0.769236	0.316977	0.506145	no	0.769236	0.506145	Ras-related protein Rab-5C
P35700	Prdx1	PRDX1_MOUSE	P35700_K120	TB_24H-MOCK_24H	2.2154	4.2898e-06	6.50416e-05	no	2.2154	6.50416e-05	Peroxiredoxin-1 (EC 1.11.1.15) (Macrophage 23 kDa stress protein) (Osteoblast-specific factor 3) (OSF-3) (Thioredoxin peroxidase 2) (Thioredoxin-dependent peroxide reductase 2)
P35700	Prdx1	PRDX1_MOUSE	P35700_K93	TB_24H-MOCK_24H	2.04419	0.000214195	0.00180423	no	2.04419	0.00180423	Peroxiredoxin-1 (EC 1.11.1.15) (Macrophage 23 kDa stress protein) (Osteoblast-specific factor 3) (OSF-3) (Thioredoxin peroxidase 2) (Thioredoxin-dependent peroxide reductase 2)
P35700	Prdx1	PRDX1_MOUSE	P35700_K109	TB_24H-MOCK_24H	1.50206	0.117415	0.255362	no	1.50206	0.255362	Peroxiredoxin-1 (EC 1.11.1.15) (Macrophage 23 kDa stress protein) (Osteoblast-specific factor 3) (OSF-3) (Thioredoxin peroxidase 2) (Thioredoxin-dependent peroxide reductase 2)
P35700	Prdx1	PRDX1_MOUSE	P35700_K7	TB_24H-MOCK_24H	2.88086	3.62923e-06	5.72053e-05	no	2.88086	5.72053e-05	Peroxiredoxin-1 (EC 1.11.1.15) (Macrophage 23 kDa stress protein) (Osteoblast-specific factor 3) (OSF-3) (Thioredoxin peroxidase 2) (Thioredoxin-dependent peroxide reductase 2)
P35700	Prdx1	PRDX1_MOUSE	P35700_K136	TB_24H-MOCK_24H	#NUM!		0	yes	5.88102	0.0226928	Peroxiredoxin-1 (EC 1.11.1.15) (Macrophage 23 kDa stress protein) (Osteoblast-specific factor 3) (OSF-3) (Thioredoxin peroxidase 2) (Thioredoxin-dependent peroxide reductase 2)
P35979	Rpl12	RL12_MOUSE	P35979_K61	TB_24H-MOCK_24H	0.0428328	0.956723	0.971367	no	0.0428328	0.971367	60S ribosomal protein L12
P35980	Rpl18	RL18_MOUSE	P35980_K78	TB_24H-MOCK_24H	-2.1122	0.0188008	0.0668099	no	-2.1122	0.0668099	60S ribosomal protein L18
P36371	Tap2	TAP2_MOUSE	P36371_K675	TB_24H-MOCK_24H	0.640698	0.219861	0.399565	no	0.640698	0.399565	Antigen peptide transporter 2 (APT2) (ATP-binding cassette sub-family B member 3) (Histocompatibility antigen modifier 2)
P37040	Por	NCPR_MOUSE	P37040_K487	TB_24H-MOCK_24H	1.0401	0.00363597	0.0191038	no	1.0401	0.0191038	NADPH--cytochrome P450 reductase (CPR) (P450R) (EC 1.6.2.4)
P39428	Traf1	TRAF1_MOUSE	P39428_K271	TB_24H-MOCK_24H	#NUM!		0	yes	3.87879	0.0245432	TNF receptor-associated factor 1
P40124	Cap1	CAP1_MOUSE	P40124_K363	TB_24H-MOCK_24H	0.636594	0.0135932	0.0526572	no	0.636594	0.0526572	Adenylyl cyclase-associated protein 1 (CAP 1)
P40124	Cap1	CAP1_MOUSE	P40124_K411	TB_24H-MOCK_24H	0.670425	0.053595	0.148604	no	0.670425	0.148604	Adenylyl cyclase-associated protein 1 (CAP 1)
P40124	Cap1	CAP1_MOUSE	P40124_K62	TB_24H-MOCK_24H	0.168002	0.612244	0.751498	no	0.168002	0.751498	Adenylyl cyclase-associated protein 1 (CAP 1)
P40124	Cap1	CAP1_MOUSE	P40124_K375	TB_24H-MOCK_24H	1.77285	0.00118773	0.00750346	no	1.77285	0.00750346	Adenylyl cyclase-associated protein 1 (CAP 1)
P40124	Cap1	CAP1_MOUSE	P40124_K376	TB_24H-MOCK_24H	0.215752	0.716138	0.825556	no	0.215752	0.825556	Adenylyl cyclase-associated protein 1 (CAP 1)
P40142	Tkt	TKT_MOUSE	P40142_K352	TB_24H-MOCK_24H	-0.670812	0.261283	0.449204	no	-0.670812	0.449204	Transketolase (TK) (EC 2.2.1.1) (P68)
P40142	Tkt	TKT_MOUSE	P40142_K319	TB_24H-MOCK_24H	0.423133	0.480194	0.659594	no	0.423133	0.659594	Transketolase (TK) (EC 2.2.1.1) (P68)
P40142	Tkt	TKT_MOUSE	P40142_K254	TB_24H-MOCK_24H	-0.842455	0.225361	0.406314	no	-0.842455	0.406314	Transketolase (TK) (EC 2.2.1.1) (P68)
P40142	Tkt	TKT_MOUSE	P40142_K456	TB_24H-MOCK_24H	-0.320873	0.6194	0.758527	no	-0.320873	0.758527	Transketolase (TK) (EC 2.2.1.1) (P68)
P40142	Tkt	TKT_MOUSE	P40142_K16	TB_24H-MOCK_24H	0.774467	0.0538596	0.148604	no	0.774467	0.148604	Transketolase (TK) (EC 2.2.1.1) (P68)
P40142	Tkt	TKT_MOUSE	P40142_K102	TB_24H-MOCK_24H	-2.06561	0.0874811	0.208488	no	-2.06561	0.208488	Transketolase (TK) (EC 2.2.1.1) (P68)
P40142	Tkt	TKT_MOUSE	P40142_K204	TB_24H-MOCK_24H	0.396279	0.578223	0.728179	no	0.396279	0.728179	Transketolase (TK) (EC 2.2.1.1) (P68)
P40142	Tkt	TKT_MOUSE	P40142_K465	TB_24H-MOCK_24H	-3.10915	0.000655896	0.00455977	no	-3.10915	0.00455977	Transketolase (TK) (EC 2.2.1.1) (P68)
P40142	Tkt	TKT_MOUSE	P40142_K241	TB_24H-MOCK_24H	0.848322	0.2434	0.429117	no	0.848322	0.429117	Transketolase (TK) (EC 2.2.1.1) (P68)
P40142	Tkt	TKT_MOUSE	P40142_K232	TB_24H-MOCK_24H	-0.598283	0.524837	0.686963	no	-0.598283	0.686963	Transketolase (TK) (EC 2.2.1.1) (P68)
P40142	Tkt	TKT_MOUSE	P40142_K310	TB_24H-MOCK_24H	-1.20644	0.137968	0.291548	no	-1.20644	0.291548	Transketolase (TK) (EC 2.2.1.1) (P68)
P40142	Tkt	TKT_MOUSE	P40142_K260	TB_24H-MOCK_24H	0.679519	0.126996	0.272477	no	0.679519	0.272477	Transketolase (TK) (EC 2.2.1.1) (P68)
P40142	Tkt	TKT_MOUSE	P40142_K353	TB_24H-MOCK_24H	#NUM!		0	yes	6.45505	0.0101198	Transketolase (TK) (EC 2.2.1.1) (P68)
P41105	Rpl28	RL28_MOUSE	P41105_K33	TB_24H-MOCK_24H	-0.088993	0.840983	0.906125	no	-0.088993	0.906125	60S ribosomal protein L28
P41105	Rpl28	RL28_MOUSE	P41105_K19	TB_24H-MOCK_24H	-0.13731	0.74332	0.846471	no	-0.13731	0.846471	60S ribosomal protein L28
P41105	Rpl28	RL28_MOUSE	P41105_K127	TB_24H-MOCK_24H	0.204484	0.815765	0.893189	no	0.204484	0.893189	60S ribosomal protein L28
P42225	Stat1	STAT1_MOUSE	P42225_K636	TB_24H-MOCK_24H	1.99327	0.181349	0.352082	no	1.99327	0.352082	Signal transducer and activator of transcription 1
P42225	Stat1	STAT1_MOUSE	P42225_K379	TB_24H-MOCK_24H	2.44851	0.0239434	0.0807583	no	2.44851	0.0807583	Signal transducer and activator of transcription 1
P42225	Stat1	STAT1_MOUSE	P42225_K410	TB_24H-MOCK_24H	3.28665	6.64254e-10	4.22997e-08	no	3.28665	4.22997e-08	Signal transducer and activator of transcription 1
P42225	Stat1	STAT1_MOUSE	P42225_K592	TB_24H-MOCK_24H	2.45357	0.0061975	0.0283518	no	2.45357	0.0283518	Signal transducer and activator of transcription 1
P42227	Stat3	STAT3_MOUSE	P42227_K601	TB_24H-MOCK_24H	#NUM!		0	yes	6.22838	0.0404163	Signal transducer and activator of transcription 3 (Acute-phase response factor)
P42230	Stat5a	STA5A_MOUSE	P52633_K284,P42232_K343,P42230_K343	TB_24H-MOCK_24H	1.47038	4.42672e-07	1.13611e-05	no	1.47038	1.13611e-05	Signal transducer and activator of transcription 5A (Mammary gland factor)
P42669	Pura	PURA_MOUSE	P42669_K96	TB_24H-MOCK_24H	#NUM!		0	yes	3.29148	0.0393703	Transcriptional activator protein Pur-alpha (Purine-rich single-stranded DNA-binding protein alpha)
P42932	Cct8	TCPQ_MOUSE	P42932_K326	TB_24H-MOCK_24H	0.695568	0.014991	0.0565537	no	0.695568	0.0565537	T-complex protein 1 subunit theta (TCP-1-theta) (CCT-theta)
P42932	Cct8	TCPQ_MOUSE	P42932_K235	TB_24H-MOCK_24H	0.547221	0.454662	0.634222	no	0.547221	0.634222	T-complex protein 1 subunit theta (TCP-1-theta) (CCT-theta)
P42932	Cct8	TCPQ_MOUSE	P42932_K152	TB_24H-MOCK_24H	0.271427	0.555474	0.712102	no	0.271427	0.712102	T-complex protein 1 subunit theta (TCP-1-theta) (CCT-theta)
P42932	Cct8	TCPQ_MOUSE	P42932_K20	TB_24H-MOCK_24H	-0.197001	0.752962	0.851966	no	-0.197001	0.851966	T-complex protein 1 subunit theta (TCP-1-theta) (CCT-theta)
P43274	Hist1h1e	H14_MOUSE	P43274_K90,P43276_K90,P43277_K91	TB_24H-MOCK_24H	-1.31073	0.00028907	0.00230463	no	-1.31073	0.00230463	Histone H1.4 (H1 VAR.2) (H1e)
P43274	Hist1h1e	H14_MOUSE	P43274_K17	TB_24H-MOCK_24H	-0.418379	0.226456	0.407825	no	-0.418379	0.407825	Histone H1.4 (H1 VAR.2) (H1e)
P43274	Hist1h1e	H14_MOUSE	P43274_K34	TB_24H-MOCK_24H	-1.3853	0.00200104	0.0116265	no	-1.3853	0.0116265	Histone H1.4 (H1 VAR.2) (H1e)
P43274	Hist1h1e	H14_MOUSE	P43274_K97,P43276_K97,P43277_K98	TB_24H-MOCK_24H	-1.6565	0.000135509	0.00122729	no	-1.6565	0.00122729	Histone H1.4 (H1 VAR.2) (H1e)
P43274	Hist1h1e	H14_MOUSE	P43274_K46	TB_24H-MOCK_24H	-0.666709	0.214786	0.393033	no	-0.666709	0.393033	Histone H1.4 (H1 VAR.2) (H1e)
P43274	Hist1h1e	H14_MOUSE	P43274_K110,P43276_K110,P43277_K111	TB_24H-MOCK_24H	-1.59766	0.0909169	0.213796	no	-1.59766	0.213796	Histone H1.4 (H1 VAR.2) (H1e)
P43274	Hist1h1e	H14_MOUSE	P43274_K21	TB_24H-MOCK_24H	-0.343986	0.661549	0.786831	no	-0.343986	0.786831	Histone H1.4 (H1 VAR.2) (H1e)
P43275	Hist1h1a	H11_MOUSE	P43275_K36	TB_24H-MOCK_24H	#NUM!		0	yes	-4.10021	0.0351403	Histone H1.1 (H1 VAR.3) (Histone H1a) (H1a)
P43275	Hist1h1a	H11_MOUSE	P43275_K121	TB_24H-MOCK_24H	-1.47795	5.66366e-08	2.00368e-06	no	-1.47795	2.00368e-06	Histone H1.1 (H1 VAR.3) (Histone H1a) (H1a)
P43275	Hist1h1a	H11_MOUSE	P43275_K116	TB_24H-MOCK_24H	-1.78435	0.00050678	0.00370089	no	-1.78435	0.00370089	Histone H1.1 (H1 VAR.3) (Histone H1a) (H1a)
P43275	Hist1h1a	H11_MOUSE	P43275_K23	TB_24H-MOCK_24H	#NUM!		0	yes	-5.20048	0.027137	Histone H1.1 (H1 VAR.3) (Histone H1a) (H1a)
P43275	Hist1h1a	H11_MOUSE	P43275_K22	TB_24H-MOCK_24H	-2.32421	0.00629576	0.0285551	no	-2.32421	0.0285551	Histone H1.1 (H1 VAR.3) (Histone H1a) (H1a)
P43275	Hist1h1a	H11_MOUSE	P43275_K92	TB_24H-MOCK_24H	-1.57501	0.000118847	0.00110003	no	-1.57501	0.00110003	Histone H1.1 (H1 VAR.3) (Histone H1a) (H1a)
P43275	Hist1h1a	H11_MOUSE	P43275_K77	TB_24H-MOCK_24H	#NUM!		0	yes	-2.68436	0.0187172	Histone H1.1 (H1 VAR.3) (Histone H1a) (H1a)
P43276	Hist1h1b	H15_MOUSE	P43276_K75	TB_24H-MOCK_24H	-1.5832	0.000175537	0.00153546	no	-1.5832	0.00153546	Histone H1.5 (H1 VAR.5) (H1b)
P43276	Hist1h1b	H15_MOUSE	P43276_K46	TB_24H-MOCK_24H	-1.67933	0.0133224	0.0521113	no	-1.67933	0.0521113	Histone H1.5 (H1 VAR.5) (H1b)
P43276	Hist1h1b	H15_MOUSE	P43276_K165	TB_24H-MOCK_24H	-0.827949	0.114771	0.251673	no	-0.827949	0.251673	Histone H1.5 (H1 VAR.5) (H1b)
P43276	Hist1h1b	H15_MOUSE	P43276_K17	TB_24H-MOCK_24H	1.09196	0.293594	0.480866	no	1.09196	0.480866	Histone H1.5 (H1 VAR.5) (H1b)
P43276	Hist1h1b	H15_MOUSE	P43276_K52	TB_24H-MOCK_24H	-0.558282	0.265329	0.453709	no	-0.558282	0.453709	Histone H1.5 (H1 VAR.5) (H1b)
P43276	Hist1h1b	H15_MOUSE	P43276_K64	TB_24H-MOCK_24H	0.166327	0.700893	0.813874	no	0.166327	0.813874	Histone H1.5 (H1 VAR.5) (H1b)
P43277	Hist1h1d	H13_MOUSE	P43277_K22	TB_24H-MOCK_24H	-1.65375	0.000446821	0.00335538	no	-1.65375	0.00335538	Histone H1.3 (H1 VAR.4) (H1d)
P43277	Hist1h1d	H13_MOUSE	P43277_K17	TB_24H-MOCK_24H	-0.941448	0.160061	0.3229	no	-0.941448	0.3229	Histone H1.3 (H1 VAR.4) (H1d)
P43277	Hist1h1d	H13_MOUSE	P43277_K21	TB_24H-MOCK_24H	-1.30514	0.107042	0.240278	no	-1.30514	0.240278	Histone H1.3 (H1 VAR.4) (H1d)
P43883	Plin2	PLIN2_MOUSE	P43883_K373	TB_24H-MOCK_24H	#NUM!		0	yes	6.10433	0.0174388	Perilipin-2 (Adipophilin) (Adipose differentiation-related protein) (ADRP)
P43883	Plin2	PLIN2_MOUSE	P43883_K416	TB_24H-MOCK_24H	#NUM!		0	yes	7.60117	0.020154	Perilipin-2 (Adipophilin) (Adipose differentiation-related protein) (ADRP)
P43883	Plin2	PLIN2_MOUSE	P43883_K423	TB_24H-MOCK_24H	#NUM!		0	yes	3.90795	0.013897	Perilipin-2 (Adipophilin) (Adipose differentiation-related protein) (ADRP)
P43883	Plin2	PLIN2_MOUSE	P43883_K224	TB_24H-MOCK_24H	#NUM!		0	yes	5.78025	0.0102334	Perilipin-2 (Adipophilin) (Adipose differentiation-related protein) (ADRP)
P45376	Akr1b1	ALDR_MOUSE	P45376_K90	TB_24H-MOCK_24H	-0.407318	0.0367448	0.112065	no	-0.407318	0.112065	Aldose reductase (AR) (EC 1.1.1.21) (Aldehyde reductase)
P46471	Psmc2	PRS7_MOUSE	P46471_K356	TB_24H-MOCK_24H	1.27948	0.0119568	0.0483126	no	1.27948	0.0483126	26S protease regulatory subunit 7 (26S proteasome AAA-ATPase subunit RPT1) (Proteasome 26S subunit ATPase 2) (Protein MSS1)
P46471	Psmc2	PRS7_MOUSE	P46471_K422	TB_24H-MOCK_24H	-0.345857	0.314744	0.504098	no	-0.345857	0.504098	26S protease regulatory subunit 7 (26S proteasome AAA-ATPase subunit RPT1) (Proteasome 26S subunit ATPase 2) (Protein MSS1)
P46638	Rab11b	RB11B_MOUSE	P46638_K24,P62492_K24	TB_24H-MOCK_24H	#NUM!		0	yes	5.25767	0.0370215	Ras-related protein Rab-11B
P46638	Rab11b	RB11B_MOUSE	P46638_K179	TB_24H-MOCK_24H	-0.818443	0.371757	0.559392	no	-0.818443	0.559392	Ras-related protein Rab-11B
P47740	Aldh3a2	AL3A2_MOUSE	P47740_K296	TB_24H-MOCK_24H	-1.76063	0.0397079	0.118159	no	-1.76063	0.118159	Fatty aldehyde dehydrogenase (EC 1.2.1.3) (Aldehyde dehydrogenase 3) (Aldehyde dehydrogenase family 3 member A2)
P47757	Capzb	CAPZB_MOUSE	P47757_K235	TB_24H-MOCK_24H	1.21711	0.0640924	0.167271	no	1.21711	0.167271	F-actin-capping protein subunit beta (CapZ beta)
P47758	Srprb	SRPRB_MOUSE	P47758_K189	TB_24H-MOCK_24H	-1.00008	0.0327828	0.103095	no	-1.00008	0.103095	Signal recognition particle receptor subunit beta (SR-beta)
P47758	Srprb	SRPRB_MOUSE	P47758_K225	TB_24H-MOCK_24H	-1.06875	0.108478	0.241434	no	-1.06875	0.241434	Signal recognition particle receptor subunit beta (SR-beta)
P47802	Mtx1	MTX1_MOUSE	P47802_K38	TB_24H-MOCK_24H	0.385943	0.467371	0.647333	no	0.385943	0.647333	Metaxin-1 (Mitochondrial outer membrane import complex protein 1)
P47802	Mtx1	MTX1_MOUSE	P47802_K41	TB_24H-MOCK_24H	-0.691415	0.265938	0.454263	no	-0.691415	0.454263	Metaxin-1 (Mitochondrial outer membrane import complex protein 1)
P47911	Rpl6	RL6_MOUSE	P47911_K270	TB_24H-MOCK_24H	0.218909	0.748826	0.848492	no	0.218909	0.848492	60S ribosomal protein L6 (TAX-responsive enhancer element-binding protein 107) (TAXREB107)
P47911	Rpl6	RL6_MOUSE	P47911_K18	TB_24H-MOCK_24H	-0.925545	0.166441	0.331633	no	-0.925545	0.331633	60S ribosomal protein L6 (TAX-responsive enhancer element-binding protein 107) (TAXREB107)
P47915	Rpl29	RL29_MOUSE	P47915_K126	TB_24H-MOCK_24H	-0.15485	0.629663	0.766379	no	-0.15485	0.766379	60S ribosomal protein L29
P47915	Rpl29	RL29_MOUSE	P47915_K82	TB_24H-MOCK_24H	0.844638	0.0482694	0.137962	no	0.844638	0.137962	60S ribosomal protein L29
P47915	Rpl29	RL29_MOUSE	P47915_K63	TB_24H-MOCK_24H	0.837451	0.166832	0.331995	no	0.837451	0.331995	60S ribosomal protein L29
P47915	Rpl29	RL29_MOUSE	P47915_K134	TB_24H-MOCK_24H	0.205948	0.572979	0.72453	no	0.205948	0.72453	60S ribosomal protein L29
P47915	Rpl29	RL29_MOUSE	P47915_K145	TB_24H-MOCK_24H	-0.894307	0.0722518	0.180573	no	-0.894307	0.180573	60S ribosomal protein L29
P48036	Anxa5	ANXA5_MOUSE	P48036_K84	TB_24H-MOCK_24H	0.628638	0.243022	0.429117	no	0.628638	0.429117	Annexin A5 (Anchorin CII) (Annexin V) (Annexin-5) (Calphobindin I) (CBP-I) (Endonexin II) (Lipocortin V) (Placental anticoagulant protein 4) (PP4) (Placental anticoagulant protein I) (PAP-I) (Thromboplastin inhibitor) (Vascular anticoagulant-alpha) (VAC-alpha)
P48036	Anxa5	ANXA5_MOUSE	P48036_K99	TB_24H-MOCK_24H	1.02513	0.079631	0.193532	no	1.02513	0.193532	Annexin A5 (Anchorin CII) (Annexin V) (Annexin-5) (Calphobindin I) (CBP-I) (Endonexin II) (Lipocortin V) (Placental anticoagulant protein 4) (PP4) (Placental anticoagulant protein I) (PAP-I) (Thromboplastin inhibitor) (Vascular anticoagulant-alpha) (VAC-alpha)
P48036	Anxa5	ANXA5_MOUSE	P48036_K95	TB_24H-MOCK_24H	0.996613	0.198924	0.373901	no	0.996613	0.373901	Annexin A5 (Anchorin CII) (Annexin V) (Annexin-5) (Calphobindin I) (CBP-I) (Endonexin II) (Lipocortin V) (Placental anticoagulant protein 4) (PP4) (Placental anticoagulant protein I) (PAP-I) (Thromboplastin inhibitor) (Vascular anticoagulant-alpha) (VAC-alpha)
P48453	Ppp3cb	PP2BB_MOUSE	P48455_K319,P63328_K323,P48453_K332	TB_24H-MOCK_24H	0.836876	0.00476302	0.0234269	no	0.836876	0.0234269	Serine/threonine-protein phosphatase 2B catalytic subunit beta isoform (EC 3.1.3.16) (CAM-PRP catalytic subunit) (Calmodulin-dependent calcineurin A subunit beta isoform)
P48678	Lmna	LMNA_MOUSE	P48678_K97	TB_24H-MOCK_24H	-1.33078	0.000383989	0.00295319	no	-1.33078	0.00295319	Prelamin-A/C [Cleaved into: Lamin-A/C]
P48678	Lmna	LMNA_MOUSE	P48678_K233	TB_24H-MOCK_24H	-2.27148	1.28738e-06	2.59591e-05	no	-2.27148	2.59591e-05	Prelamin-A/C [Cleaved into: Lamin-A/C]
P48678	Lmna	LMNA_MOUSE	P48678_K122	TB_24H-MOCK_24H	-1.70715	0.000727605	0.00499288	no	-1.70715	0.00499288	Prelamin-A/C [Cleaved into: Lamin-A/C]
P48678	Lmna	LMNA_MOUSE	P48678_K180	TB_24H-MOCK_24H	-1.26859	0.0255833	0.0843648	no	-1.26859	0.0843648	Prelamin-A/C [Cleaved into: Lamin-A/C]
P48678	Lmna	LMNA_MOUSE	P48678_K261	TB_24H-MOCK_24H	-0.69475	0.389844	0.57801	no	-0.69475	0.57801	Prelamin-A/C [Cleaved into: Lamin-A/C]
P48678	Lmna	LMNA_MOUSE	P48678_K270	TB_24H-MOCK_24H	-1.92928	7.25687e-10	4.44344e-08	no	-1.92928	4.44344e-08	Prelamin-A/C [Cleaved into: Lamin-A/C]
P48678	Lmna	LMNA_MOUSE	P48678_K417	TB_24H-MOCK_24H	-1.64728	1.23228e-05	0.000156943	no	-1.64728	0.000156943	Prelamin-A/C [Cleaved into: Lamin-A/C]
P48722	Hspa4l	HS74L_MOUSE	P48722_K102	TB_24H-MOCK_24H	1.46362	0.0759678	0.187505	no	1.46362	0.187505	Heat shock 70 kDa protein 4L (Heat shock 70-related protein APG-1) (Osmotic stress protein 94)
P48722	Hspa4l	HS74L_MOUSE	P48722_K388,Q61316_K388,Q61699_K388	TB_24H-MOCK_24H	0.16839	0.43023	0.613184	no	0.16839	0.613184	Heat shock 70 kDa protein 4L (Heat shock 70-related protein APG-1) (Osmotic stress protein 94)
P49138	Mapkapk2	MAPK2_MOUSE	P49138_K293	TB_24H-MOCK_24H	0.863099	0.0243666	0.0816667	no	0.863099	0.0816667	MAP kinase-activated protein kinase 2 (MAPK-activated protein kinase 2) (MAPKAP kinase 2) (MAPKAP-K2) (MAPKAPK-2) (MK-2) (MK2) (EC 2.7.11.1)
P49312	Hnrnpa1	ROA1_MOUSE	P49312_K3	TB_24H-MOCK_24H	-1.03556	0.000225471	0.00187932	no	-1.03556	0.00187932	Heterogeneous nuclear ribonucleoprotein A1 (hnRNP A1) (HDP-1) (Helix-destabilizing protein) (Single-strand-binding protein) (Topoisomerase-inhibitor suppressed) (hnRNP core protein A1) [Cleaved into: Heterogeneous nuclear ribonucleoprotein A1, N-terminally processed]
P49722	Psma2	PSA2_MOUSE	P49722_K171	TB_24H-MOCK_24H	#NUM!		0	yes	2.70836	0.0109493	Proteasome subunit alpha type-2 (EC 3.4.25.1) (Macropain subunit C3) (Multicatalytic endopeptidase complex subunit C3) (Proteasome component C3)
P50516	Atp6v1a	VATA_MOUSE	P50516_K585	TB_24H-MOCK_24H	0.401212	0.671654	0.794253	no	0.401212	0.794253	V-type proton ATPase catalytic subunit A (V-ATPase subunit A) (EC 3.6.3.14) (V-ATPase 69 kDa subunit) (Vacuolar proton pump subunit alpha)
P50516	Atp6v1a	VATA_MOUSE	P50516_K5	TB_24H-MOCK_24H	-0.353763	0.555547	0.712102	no	-0.353763	0.712102	V-type proton ATPase catalytic subunit A (V-ATPase subunit A) (EC 3.6.3.14) (V-ATPase 69 kDa subunit) (Vacuolar proton pump subunit alpha)
P50516	Atp6v1a	VATA_MOUSE	P50516_K165	TB_24H-MOCK_24H	0.241553	0.560718	0.715274	no	0.241553	0.715274	V-type proton ATPase catalytic subunit A (V-ATPase subunit A) (EC 3.6.3.14) (V-ATPase 69 kDa subunit) (Vacuolar proton pump subunit alpha)
P50516	Atp6v1a	VATA_MOUSE	P50516_K580	TB_24H-MOCK_24H	1.50862	0.00941999	0.0397788	no	1.50862	0.0397788	V-type proton ATPase catalytic subunit A (V-ATPase subunit A) (EC 3.6.3.14) (V-ATPase 69 kDa subunit) (Vacuolar proton pump subunit alpha)
P50516	Atp6v1a	VATA_MOUSE	P50516_K220	TB_24H-MOCK_24H	0.508216	0.374934	0.561519	no	0.508216	0.561519	V-type proton ATPase catalytic subunit A (V-ATPase subunit A) (EC 3.6.3.14) (V-ATPase 69 kDa subunit) (Vacuolar proton pump subunit alpha)
P50516	Atp6v1a	VATA_MOUSE	P50516_K393	TB_24H-MOCK_24H	1.33545	0.0208737	0.0722666	no	1.33545	0.0722666	V-type proton ATPase catalytic subunit A (V-ATPase subunit A) (EC 3.6.3.14) (V-ATPase 69 kDa subunit) (Vacuolar proton pump subunit alpha)
P51410	Rpl9	RL9_MOUSE	P51410_K28	TB_24H-MOCK_24H	0.469902	0.0191518	0.0677548	no	0.469902	0.0677548	60S ribosomal protein L9
P51660	Hsd17b4	DHB4_MOUSE	P51660_K50	TB_24H-MOCK_24H	0.392672	0.177655	0.347184	no	0.392672	0.347184	Peroxisomal multifunctional enzyme type 2 (MFE-2) (17-beta-hydroxysteroid dehydrogenase 4) (17-beta-HSD 4) (D-bifunctional protein) (DBP) (Multifunctional protein 2) (MPF-2) [Cleaved into: (3R)-hydroxyacyl-CoA dehydrogenase (EC 1.1.1.n12); Enoyl-CoA hydratase 2 (EC 4.2.1.107) (EC 4.2.1.119) (3-alpha,7-alpha,12-alpha-trihydroxy-5-beta-cholest-24-enoyl-CoA hydratase)]
P51660	Hsd17b4	DHB4_MOUSE	P51660_K478	TB_24H-MOCK_24H	0.85532	0.205703	0.380348	no	0.85532	0.380348	Peroxisomal multifunctional enzyme type 2 (MFE-2) (17-beta-hydroxysteroid dehydrogenase 4) (17-beta-HSD 4) (D-bifunctional protein) (DBP) (Multifunctional protein 2) (MPF-2) [Cleaved into: (3R)-hydroxyacyl-CoA dehydrogenase (EC 1.1.1.n12); Enoyl-CoA hydratase 2 (EC 4.2.1.107) (EC 4.2.1.119) (3-alpha,7-alpha,12-alpha-trihydroxy-5-beta-cholest-24-enoyl-CoA hydratase)]
P51660	Hsd17b4	DHB4_MOUSE	P51660_K414	TB_24H-MOCK_24H	#NUM!		0	yes	3.39908	0.0309309	Peroxisomal multifunctional enzyme type 2 (MFE-2) (17-beta-hydroxysteroid dehydrogenase 4) (17-beta-HSD 4) (D-bifunctional protein) (DBP) (Multifunctional protein 2) (MPF-2) [Cleaved into: (3R)-hydroxyacyl-CoA dehydrogenase (EC 1.1.1.n12); Enoyl-CoA hydratase 2 (EC 4.2.1.107) (EC 4.2.1.119) (3-alpha,7-alpha,12-alpha-trihydroxy-5-beta-cholest-24-enoyl-CoA hydratase)]
P51660	Hsd17b4	DHB4_MOUSE	P51660_K184	TB_24H-MOCK_24H	0.522829	0.0702307	0.177472	no	0.522829	0.177472	Peroxisomal multifunctional enzyme type 2 (MFE-2) (17-beta-hydroxysteroid dehydrogenase 4) (17-beta-HSD 4) (D-bifunctional protein) (DBP) (Multifunctional protein 2) (MPF-2) [Cleaved into: (3R)-hydroxyacyl-CoA dehydrogenase (EC 1.1.1.n12); Enoyl-CoA hydratase 2 (EC 4.2.1.107) (EC 4.2.1.119) (3-alpha,7-alpha,12-alpha-trihydroxy-5-beta-cholest-24-enoyl-CoA hydratase)]
P52332	Jak1	JAK1_MOUSE	P52332_K100	TB_24H-MOCK_24H	-0.0612927	0.945174	0.967041	no	-0.0612927	0.967041	Tyrosine-protein kinase JAK1 (EC 2.7.10.2) (Janus kinase 1) (JAK-1)
P52332	Jak1	JAK1_MOUSE	P52332_K558	TB_24H-MOCK_24H	0.658674	0.0410952	0.121264	no	0.658674	0.121264	Tyrosine-protein kinase JAK1 (EC 2.7.10.2) (Janus kinase 1) (JAK-1)
P52332	Jak1	JAK1_MOUSE	P52332_K227	TB_24H-MOCK_24H	0.160847	0.722955	0.830407	no	0.160847	0.830407	Tyrosine-protein kinase JAK1 (EC 2.7.10.2) (Janus kinase 1) (JAK-1)
P52332	Jak1	JAK1_MOUSE	P52332_K559	TB_24H-MOCK_24H	#NUM!		0	yes	3.93857	0.0292112	Tyrosine-protein kinase JAK1 (EC 2.7.10.2) (Janus kinase 1) (JAK-1)
P52480	Pkm	KPYM_MOUSE	P52480_K311,P53657_K354	TB_24H-MOCK_24H	2.75671	1.38888e-06	2.76387e-05	no	2.75671	2.76387e-05	Pyruvate kinase PKM (EC 2.7.1.40) (Pyruvate kinase muscle isozyme)
P52480	Pkm	KPYM_MOUSE	P52480_K115	TB_24H-MOCK_24H	2.93688	2.15904e-07	5.82576e-06	no	2.93688	5.82576e-06	Pyruvate kinase PKM (EC 2.7.1.40) (Pyruvate kinase muscle isozyme)
P52480	Pkm	KPYM_MOUSE	P52480_K206	TB_24H-MOCK_24H	1.95883	0.03048	0.0968547	no	1.95883	0.0968547	Pyruvate kinase PKM (EC 2.7.1.40) (Pyruvate kinase muscle isozyme)
P52480	Pkm	KPYM_MOUSE	P52480_K136	TB_24H-MOCK_24H	0.778049	0.320298	0.508896	no	0.778049	0.508896	Pyruvate kinase PKM (EC 2.7.1.40) (Pyruvate kinase muscle isozyme)
P52480	Pkm	KPYM_MOUSE	P52480_K66	TB_24H-MOCK_24H	1.36715	0.000132468	0.00121902	no	1.36715	0.00121902	Pyruvate kinase PKM (EC 2.7.1.40) (Pyruvate kinase muscle isozyme)
P52480	Pkm	KPYM_MOUSE	P52480_K261	TB_24H-MOCK_24H	-0.533373	0.386859	0.575051	no	-0.533373	0.575051	Pyruvate kinase PKM (EC 2.7.1.40) (Pyruvate kinase muscle isozyme)
P52480	Pkm	KPYM_MOUSE	P52480_K305,P53657_K348	TB_24H-MOCK_24H	2.08897	5.81034e-06	8.3999e-05	no	2.08897	8.3999e-05	Pyruvate kinase PKM (EC 2.7.1.40) (Pyruvate kinase muscle isozyme)
P52480	Pkm	KPYM_MOUSE	P52480_K433	TB_24H-MOCK_24H	2.45158	6.03587e-10	4.17787e-08	no	2.45158	4.17787e-08	Pyruvate kinase PKM (EC 2.7.1.40) (Pyruvate kinase muscle isozyme)
P52480	Pkm	KPYM_MOUSE	P52480_K166	TB_24H-MOCK_24H	1.45012	0.00021391	0.00180423	no	1.45012	0.00180423	Pyruvate kinase PKM (EC 2.7.1.40) (Pyruvate kinase muscle isozyme)
P52480	Pkm	KPYM_MOUSE	P52480_K207	TB_24H-MOCK_24H	2.32163	0.0125264	0.0503586	no	2.32163	0.0503586	Pyruvate kinase PKM (EC 2.7.1.40) (Pyruvate kinase muscle isozyme)
P52480	Pkm	KPYM_MOUSE	P52480_K266	TB_24H-MOCK_24H	1.18371	0.0516963	0.145665	no	1.18371	0.145665	Pyruvate kinase PKM (EC 2.7.1.40) (Pyruvate kinase muscle isozyme)
P52480	Pkm	KPYM_MOUSE	P52480_K270	TB_24H-MOCK_24H	2.69951	1.94381e-06	3.59831e-05	no	2.69951	3.59831e-05	Pyruvate kinase PKM (EC 2.7.1.40) (Pyruvate kinase muscle isozyme)
P52480	Pkm	KPYM_MOUSE	P52480_K135	TB_24H-MOCK_24H	3.44856	4.56729e-07	1.13611e-05	no	3.44856	1.13611e-05	Pyruvate kinase PKM (EC 2.7.1.40) (Pyruvate kinase muscle isozyme)
P52480	Pkm	KPYM_MOUSE	P52480_K62	TB_24H-MOCK_24H	2.94328	3.06289e-09	1.52379e-07	no	2.94328	1.52379e-07	Pyruvate kinase PKM (EC 2.7.1.40) (Pyruvate kinase muscle isozyme)
P52480	Pkm	KPYM_MOUSE	P52480_K247	TB_24H-MOCK_24H	0.789489	0.638582	0.772862	no	0.789489	0.772862	Pyruvate kinase PKM (EC 2.7.1.40) (Pyruvate kinase muscle isozyme)
P52480	Pkm	KPYM_MOUSE	P52480_K125	TB_24H-MOCK_24H	2.45999	1.76498e-07	4.84455e-06	no	2.45999	4.84455e-06	Pyruvate kinase PKM (EC 2.7.1.40) (Pyruvate kinase muscle isozyme)
P52482	Ube2e1	UB2E1_MOUSE	P52482_K43	TB_24H-MOCK_24H	-0.904047	0.362464	0.548255	no	-0.904047	0.548255	Ubiquitin-conjugating enzyme E2 E1 (EC 2.3.2.23) ((E3-independent) E2 ubiquitin-conjugating enzyme E1) (EC 2.3.2.24) (E2 ubiquitin-conjugating enzyme E1) (UbcM3) (Ubiquitin carrier protein E1) (Ubiquitin-protein ligase E1)
P52482	Ube2e1	UB2E1_MOUSE	P52482_K50	TB_24H-MOCK_24H	-1.06961	0.0255956	0.0843648	no	-1.06961	0.0843648	Ubiquitin-conjugating enzyme E2 E1 (EC 2.3.2.23) ((E3-independent) E2 ubiquitin-conjugating enzyme E1) (EC 2.3.2.24) (E2 ubiquitin-conjugating enzyme E1) (UbcM3) (Ubiquitin carrier protein E1) (Ubiquitin-protein ligase E1)
P52633	Stat6	STAT6_MOUSE	P52633_K284	TB_24H-MOCK_24H	0.437669	0.520209	0.682749	no	0.437669	0.682749	Signal transducer and transcription activator 6
P52633	Stat6	STAT6_MOUSE	P52633_K129	TB_24H-MOCK_24H	1.0024	0.027568	0.0890228	no	1.0024	0.0890228	Signal transducer and transcription activator 6
P53810	Pitpna	PIPNA_MOUSE	P53810_K68	TB_24H-MOCK_24H	0.20675	0.719094	0.827166	no	0.20675	0.827166	Phosphatidylinositol transfer protein alpha isoform (PI-TP-alpha) (PtdIns transfer protein alpha) (PtdInsTP alpha)
P54728	Rad23b	RD23B_MOUSE	P54728_K78	TB_24H-MOCK_24H	-1.24119	0.000518914	0.0037722	no	-1.24119	0.0037722	UV excision repair protein RAD23 homolog B (HR23B) (mHR23B) (XP-C repair-complementing complex 58 kDa protein) (p58)
P54728	Rad23b	RD23B_MOUSE	P54728_K76	TB_24H-MOCK_24H	-1.13739	0.117373	0.255362	no	-1.13739	0.255362	UV excision repair protein RAD23 homolog B (HR23B) (mHR23B) (XP-C repair-complementing complex 58 kDa protein) (p58)
P54729	Nub1	NUB1_MOUSE	P54729_K328	TB_24H-MOCK_24H	-0.444618	0.492688	0.668678	no	-0.444618	0.668678	NEDD8 ultimate buster 1 (Negative regulator of ubiquitin-like proteins 1) (Protein BS4)
P54987	Acod1	IRG1_MOUSE	P54987_K183	TB_24H-MOCK_24H	#NUM!		0	yes	4.2079	0.0232614	Cis-aconitate decarboxylase (CAD) (EC 4.1.1.6) (Aconitate decarboxylase) (Aconitate decarboxylase 1) (Cis-aconitic acid decarboxylase) (Immune-responsive gene 1 protein)
P56382	Atp5e	ATP5E_MOUSE	P56382_K21	TB_24H-MOCK_24H	-1.15068	2.68577e-06	4.59008e-05	no	-1.15068	4.59008e-05	ATP synthase subunit epsilon, mitochondrial (ATPase subunit epsilon)
P56399	Usp5	UBP5_MOUSE	P56399_K476	TB_24H-MOCK_24H	1.31386	0.000817932	0.00544832	no	1.31386	0.00544832	Ubiquitin carboxyl-terminal hydrolase 5 (EC 3.4.19.12) (Deubiquitinating enzyme 5) (Isopeptidase T) (Ubiquitin thioesterase 5) (Ubiquitin-specific-processing protease 5)
P56399	Usp5	UBP5_MOUSE	P56399_K423	TB_24H-MOCK_24H	0.549287	0.170282	0.337231	no	0.549287	0.337231	Ubiquitin carboxyl-terminal hydrolase 5 (EC 3.4.19.12) (Deubiquitinating enzyme 5) (Isopeptidase T) (Ubiquitin thioesterase 5) (Ubiquitin-specific-processing protease 5)
P56399	Usp5	UBP5_MOUSE	P56399_K743	TB_24H-MOCK_24H	-0.772604	0.00348312	0.0184223	no	-0.772604	0.0184223	Ubiquitin carboxyl-terminal hydrolase 5 (EC 3.4.19.12) (Deubiquitinating enzyme 5) (Isopeptidase T) (Ubiquitin thioesterase 5) (Ubiquitin-specific-processing protease 5)
P56399	Usp5	UBP5_MOUSE	P56399_K184	TB_24H-MOCK_24H	-0.627524	0.0748547	0.185045	no	-0.627524	0.185045	Ubiquitin carboxyl-terminal hydrolase 5 (EC 3.4.19.12) (Deubiquitinating enzyme 5) (Isopeptidase T) (Ubiquitin thioesterase 5) (Ubiquitin-specific-processing protease 5)
P56399	Usp5	UBP5_MOUSE	P56399_K178	TB_24H-MOCK_24H	0.00347697	0.990157	0.993277	no	0.00347697	0.993277	Ubiquitin carboxyl-terminal hydrolase 5 (EC 3.4.19.12) (Deubiquitinating enzyme 5) (Isopeptidase T) (Ubiquitin thioesterase 5) (Ubiquitin-specific-processing protease 5)
P56399	Usp5	UBP5_MOUSE	P56399_K574	TB_24H-MOCK_24H	#NUM!		0	yes	4.13443	0.0186834	Ubiquitin carboxyl-terminal hydrolase 5 (EC 3.4.19.12) (Deubiquitinating enzyme 5) (Isopeptidase T) (Ubiquitin thioesterase 5) (Ubiquitin-specific-processing protease 5)
P56480	Atp5b	ATPB_MOUSE	P56480_K198	TB_24H-MOCK_24H	#NUM!		0	yes	2.98992	0.0472985	ATP synthase subunit beta, mitochondrial (EC 3.6.3.14)
P57080	Usp25	UBP25_MOUSE	P57080_K716	TB_24H-MOCK_24H	-0.191743	0.808699	0.888509	no	-0.191743	0.888509	Ubiquitin carboxyl-terminal hydrolase 25 (EC 3.4.19.12) (Deubiquitinating enzyme 25) (Ubiquitin thioesterase 25) (Ubiquitin-specific-processing protease 25) (mUSP25)
P57080	Usp25	UBP25_MOUSE	P57080_K250	TB_24H-MOCK_24H	-0.229423	0.751399	0.850802	no	-0.229423	0.850802	Ubiquitin carboxyl-terminal hydrolase 25 (EC 3.4.19.12) (Deubiquitinating enzyme 25) (Ubiquitin thioesterase 25) (Ubiquitin-specific-processing protease 25) (mUSP25)
P57080	Usp25	UBP25_MOUSE	P57080_K254	TB_24H-MOCK_24H	#NUM!		0	yes	3.0274	0.0359876	Ubiquitin carboxyl-terminal hydrolase 25 (EC 3.4.19.12) (Deubiquitinating enzyme 25) (Ubiquitin thioesterase 25) (Ubiquitin-specific-processing protease 25) (mUSP25)
P57080	Usp25	UBP25_MOUSE	P57080_K201	TB_24H-MOCK_24H	0.793207	0.192971	0.365727	no	0.793207	0.365727	Ubiquitin carboxyl-terminal hydrolase 25 (EC 3.4.19.12) (Deubiquitinating enzyme 25) (Ubiquitin thioesterase 25) (Ubiquitin-specific-processing protease 25) (mUSP25)
P57080	Usp25	UBP25_MOUSE	P57080_K521	TB_24H-MOCK_24H	-0.23936	0.175482	0.344473	no	-0.23936	0.344473	Ubiquitin carboxyl-terminal hydrolase 25 (EC 3.4.19.12) (Deubiquitinating enzyme 25) (Ubiquitin thioesterase 25) (Ubiquitin-specific-processing protease 25) (mUSP25)
P57080	Usp25	UBP25_MOUSE	P57080_K631	TB_24H-MOCK_24H	0.26793	0.727978	0.834972	no	0.26793	0.834972	Ubiquitin carboxyl-terminal hydrolase 25 (EC 3.4.19.12) (Deubiquitinating enzyme 25) (Ubiquitin thioesterase 25) (Ubiquitin-specific-processing protease 25) (mUSP25)
P57776	Eef1d	EF1D_MOUSE	P57776_K117	TB_24H-MOCK_24H	#NUM!		0	yes	-2.65345	0.0211681	Elongation factor 1-delta (EF-1-delta)
P58252	Eef2	EF2_MOUSE	P58252_K16	TB_24H-MOCK_24H	1.26668	0.0775869	0.190321	no	1.26668	0.190321	Elongation factor 2 (EF-2)
P58252	Eef2	EF2_MOUSE	P58252_K498	TB_24H-MOCK_24H	-0.627268	0.0768686	0.18885	no	-0.627268	0.18885	Elongation factor 2 (EF-2)
P58252	Eef2	EF2_MOUSE	P58252_K239	TB_24H-MOCK_24H	-0.828057	0.024118	0.0810041	no	-0.828057	0.0810041	Elongation factor 2 (EF-2)
P58252	Eef2	EF2_MOUSE	P58252_K42	TB_24H-MOCK_24H	2.13686	5.41382e-05	0.000548968	no	2.13686	0.000548968	Elongation factor 2 (EF-2)
P58252	Eef2	EF2_MOUSE	P58252_K15	TB_24H-MOCK_24H	#NUM!		0	yes	7.01781	0.0260079	Elongation factor 2 (EF-2)
P58252	Eef2	EF2_MOUSE	P58252_K275	TB_24H-MOCK_24H	-0.235693	0.571578	0.723491	no	-0.235693	0.723491	Elongation factor 2 (EF-2)
P58252	Eef2	EF2_MOUSE	P58252_K159	TB_24H-MOCK_24H	0.769388	0.145226	0.302222	no	0.769388	0.302222	Elongation factor 2 (EF-2)
P58252	Eef2	EF2_MOUSE	P58252_K284	TB_24H-MOCK_24H	-1.65901	0.0410065	0.121264	no	-1.65901	0.121264	Elongation factor 2 (EF-2)
P58252	Eef2	EF2_MOUSE	P58252_K512	TB_24H-MOCK_24H	0.272574	0.406977	0.590128	no	0.272574	0.590128	Elongation factor 2 (EF-2)
P58252	Eef2	EF2_MOUSE	P58252_K272	TB_24H-MOCK_24H	0.57786	0.183205	0.354388	no	0.57786	0.354388	Elongation factor 2 (EF-2)
P58252	Eef2	EF2_MOUSE	P58252_K283	TB_24H-MOCK_24H	0.595175	0.214668	0.393033	no	0.595175	0.393033	Elongation factor 2 (EF-2)
P58801	Ripk2	RIPK2_MOUSE	P58801_K327	TB_24H-MOCK_24H	#NUM!		0	yes	2.55884	0.0453866	Receptor-interacting serine/threonine-protein kinase 2 (EC 2.7.11.1) (Tyrosine-protein kinase RIPK2) (EC 2.7.10.2)
P58801	Ripk2	RIPK2_MOUSE	P58801_K537	TB_24H-MOCK_24H	#NUM!		0	yes	2.75833	0.0420753	Receptor-interacting serine/threonine-protein kinase 2 (EC 2.7.11.1) (Tyrosine-protein kinase RIPK2) (EC 2.7.10.2)
P59708	Sf3b6	SF3B6_MOUSE	P59708_K7	TB_24H-MOCK_24H	-0.727436	0.00627954	0.0285551	no	-0.727436	0.0285551	Splicing factor 3B subunit 6 (Pre-mRNA branch site protein p14) (SF3b 14 kDa subunit)
P59999	Arpc4	ARPC4_MOUSE	P59999_K44	TB_24H-MOCK_24H	0.242592	0.342699	0.528619	no	0.242592	0.528619	Actin-related protein 2/3 complex subunit 4 (Arp2/3 complex 20 kDa subunit) (p20-ARC)
P60335	Pcbp1	PCBP1_MOUSE	P60335_K115	TB_24H-MOCK_24H	0.21961	0.639844	0.772862	no	0.21961	0.772862	Poly(rC)-binding protein 1 (Alpha-CP1) (Heterogeneous nuclear ribonucleoprotein E1) (hnRNP E1)
P60335	Pcbp1	PCBP1_MOUSE	P60335_K119	TB_24H-MOCK_24H	0.0554117	0.911748	0.948075	no	0.0554117	0.948075	Poly(rC)-binding protein 1 (Alpha-CP1) (Heterogeneous nuclear ribonucleoprotein E1) (hnRNP E1)
P60605	Ube2g2	UB2G2_MOUSE	P60605_K7	TB_24H-MOCK_24H	-0.6644	0.0264946	0.0869678	no	-0.6644	0.0869678	Ubiquitin-conjugating enzyme E2 G2 (EC 2.3.2.23) (E2 ubiquitin-conjugating enzyme G2) (Ubiquitin carrier protein G2) (Ubiquitin-protein ligase G2)
P60710	Actb	ACTB_MOUSE	P60710_K328,P63268_K329,P68134_K330,P68033_K330,P62737_K330,P63260_K328,Q8BFZ3_K329	TB_24H-MOCK_24H	0.300387	0.505263	0.67347	no	0.300387	0.67347	Actin, cytoplasmic 1 (Beta-actin) [Cleaved into: Actin, cytoplasmic 1, N-terminally processed]
P60710	Actb	ACTB_MOUSE	P60710_K326,P63268_K327,P68134_K328,P68033_K328,P62737_K328,P63260_K326	TB_24H-MOCK_24H	1.15287	0.116428	0.253908	no	1.15287	0.253908	Actin, cytoplasmic 1 (Beta-actin) [Cleaved into: Actin, cytoplasmic 1, N-terminally processed]
P60710	Actb	ACTB_MOUSE	P60710_K315,P63268_K316,P68134_K317,P68033_K317,P62737_K317,P63260_K315	TB_24H-MOCK_24H	0.739926	0.189225	0.360774	no	0.739926	0.360774	Actin, cytoplasmic 1 (Beta-actin) [Cleaved into: Actin, cytoplasmic 1, N-terminally processed]
P60710	Actb	ACTB_MOUSE	P60710_K18	TB_24H-MOCK_24H	1.30229	0.00176226	0.0105471	no	1.30229	0.0105471	Actin, cytoplasmic 1 (Beta-actin) [Cleaved into: Actin, cytoplasmic 1, N-terminally processed]
P60710	Actb	ACTB_MOUSE	P60710_K118,P63260_K118	TB_24H-MOCK_24H	0.689613	0.233714	0.417122	no	0.689613	0.417122	Actin, cytoplasmic 1 (Beta-actin) [Cleaved into: Actin, cytoplasmic 1, N-terminally processed]
P60710	Actb	ACTB_MOUSE	P60710_K328,P63268_K329,P68134_K330,P68033_K330,P62737_K330,P63260_K328	TB_24H-MOCK_24H	-0.622767	0.292957	0.480866	no	-0.622767	0.480866	Actin, cytoplasmic 1 (Beta-actin) [Cleaved into: Actin, cytoplasmic 1, N-terminally processed]
P60710	Actb	ACTB_MOUSE	P60710_K50,P63268_K51,P68134_K52,P68033_K52,P62737_K52,P63260_K50	TB_24H-MOCK_24H	-0.631495	0.32788	0.518872	no	-0.631495	0.518872	Actin, cytoplasmic 1 (Beta-actin) [Cleaved into: Actin, cytoplasmic 1, N-terminally processed]
P60710	Actb	ACTB_MOUSE	P60710_K61,P63268_K62,P68134_K63,P68033_K63,P62737_K63,P63260_K61	TB_24H-MOCK_24H	0.178247	0.557096	0.71294	no	0.178247	0.71294	Actin, cytoplasmic 1 (Beta-actin) [Cleaved into: Actin, cytoplasmic 1, N-terminally processed]
P60710	Actb	ACTB_MOUSE	P60710_K213,P63268_K214,P68134_K215,P68033_K215,P62737_K215,P63260_K213	TB_24H-MOCK_24H	1.06898	0.293233	0.480866	no	1.06898	0.480866	Actin, cytoplasmic 1 (Beta-actin) [Cleaved into: Actin, cytoplasmic 1, N-terminally processed]
P60710	Actb	ACTB_MOUSE	P60710_K113,P63260_K113	TB_24H-MOCK_24H	1.63087	0.0240078	0.0808041	no	1.63087	0.0808041	Actin, cytoplasmic 1 (Beta-actin) [Cleaved into: Actin, cytoplasmic 1, N-terminally processed]
P60762	Morf4l1	MO4L1_MOUSE	P60762_K38	TB_24H-MOCK_24H	-0.68397	0.0859172	0.205994	no	-0.68397	0.205994	Mortality factor 4-like protein 1 (MORF-related gene 15 protein) (Testis-expressed gene 189 protein) (Transcription factor-like protein MRG15)
P60762	Morf4l1	MO4L1_MOUSE	P60762_K226	TB_24H-MOCK_24H	-1.19869	0.0118659	0.0480674	no	-1.19869	0.0480674	Mortality factor 4-like protein 1 (MORF-related gene 15 protein) (Testis-expressed gene 189 protein) (Transcription factor-like protein MRG15)
P60762	Morf4l1	MO4L1_MOUSE	P60762_K227	TB_24H-MOCK_24H	-1.50172	0.00158233	0.0096468	no	-1.50172	0.0096468	Mortality factor 4-like protein 1 (MORF-related gene 15 protein) (Testis-expressed gene 189 protein) (Transcription factor-like protein MRG15)
P60762	Morf4l1	MO4L1_MOUSE	P60762_K143	TB_24H-MOCK_24H	-0.979598	0.000196127	0.00167131	no	-0.979598	0.00167131	Mortality factor 4-like protein 1 (MORF-related gene 15 protein) (Testis-expressed gene 189 protein) (Transcription factor-like protein MRG15)
P60762	Morf4l1	MO4L1_MOUSE	P60762_K111	TB_24H-MOCK_24H	-1.47493	8.10039e-09	3.39364e-07	no	-1.47493	3.39364e-07	Mortality factor 4-like protein 1 (MORF-related gene 15 protein) (Testis-expressed gene 189 protein) (Transcription factor-like protein MRG15)
P60764	Rac3	RAC3_MOUSE	P63001_K184,P60764_K184	TB_24H-MOCK_24H	0.227136	0.773756	0.861425	no	0.227136	0.861425	Ras-related C3 botulinum toxin substrate 3 (p21-Rac3)
P60766	Cdc42	CDC42_MOUSE	P60766_K163	TB_24H-MOCK_24H	#NUM!		0	yes	-3.48448	0.0274044	Cell division control protein 42 homolog (G25K GTP-binding protein)
P60766	Cdc42	CDC42_MOUSE	P60766_K153	TB_24H-MOCK_24H	-1.265	0.00559636	0.0262041	no	-1.265	0.0262041	Cell division control protein 42 homolog (G25K GTP-binding protein)
P60843	Eif4a1	IF4A1_MOUSE	P60843_K174	TB_24H-MOCK_24H	-0.969127	0.343004	0.528619	no	-0.969127	0.528619	Eukaryotic initiation factor 4A-I (eIF-4A-I) (eIF4A-I) (EC 3.6.4.13) (ATP-dependent RNA helicase eIF4A-1)
P60867	Rps20	RS20_MOUSE	P60867_K30	TB_24H-MOCK_24H	0.172866	0.498615	0.671002	no	0.172866	0.671002	40S ribosomal protein S20
P60867	Rps20	RS20_MOUSE	P60867_K8	TB_24H-MOCK_24H	-0.733414	0.582424	0.730093	no	-0.733414	0.730093	40S ribosomal protein S20
P60867	Rps20	RS20_MOUSE	P60867_K4,P60867_K8	TB_24H-MOCK_24H	-0.213727	0.702671	0.814751	no	-0.213727	0.814751	40S ribosomal protein S20
P60867	Rps20	RS20_MOUSE	P60867_K51	TB_24H-MOCK_24H	0.208823	0.651648	0.780604	no	0.208823	0.780604	40S ribosomal protein S20
P60867	Rps20	RS20_MOUSE	P60867_K4	TB_24H-MOCK_24H	-0.74433	0.242118	0.428756	no	-0.74433	0.428756	40S ribosomal protein S20
P61021	Rab5b	RAB5B_MOUSE	Q9CQD1_K140,P61021_K140	TB_24H-MOCK_24H	-0.00869374	0.971187	0.983543	no	-0.00869374	0.983543	Ras-related protein Rab-5B
P61021	Rab5b	RAB5B_MOUSE	P61021_K140	TB_24H-MOCK_24H	0.458419	0.441874	0.623085	no	0.458419	0.623085	Ras-related protein Rab-5B
P61028	Rab8b	RAB8B_MOUSE	P61028_K190	TB_24H-MOCK_24H	-0.324759	0.297687	0.485572	no	-0.324759	0.485572	Ras-related protein Rab-8B
P61082	Ube2m	UBC12_MOUSE	P61082_K3	TB_24H-MOCK_24H	-0.465917	0.0637638	0.166759	no	-0.465917	0.166759	NEDD8-conjugating enzyme Ubc12 (EC 6.3.2.-) (NEDD8 carrier protein) (NEDD8 protein ligase) (Ubiquitin-conjugating enzyme E2 M)
P61082	Ube2m	UBC12_MOUSE	P61082_K72	TB_24H-MOCK_24H	-0.424426	0.345786	0.530339	no	-0.424426	0.530339	NEDD8-conjugating enzyme Ubc12 (EC 6.3.2.-) (NEDD8 carrier protein) (NEDD8 protein ligase) (Ubiquitin-conjugating enzyme E2 M)
P61082	Ube2m	UBC12_MOUSE	P61082_K75	TB_24H-MOCK_24H	-0.175745	0.532134	0.692315	no	-0.175745	0.692315	NEDD8-conjugating enzyme Ubc12 (EC 6.3.2.-) (NEDD8 carrier protein) (NEDD8 protein ligase) (Ubiquitin-conjugating enzyme E2 M)
P61082	Ube2m	UBC12_MOUSE	P61082_K92	TB_24H-MOCK_24H	-1.83997	0.0433686	0.126684	no	-1.83997	0.126684	NEDD8-conjugating enzyme Ubc12 (EC 6.3.2.-) (NEDD8 carrier protein) (NEDD8 protein ligase) (Ubiquitin-conjugating enzyme E2 M)
P61089	Ube2n	UBE2N_MOUSE	P61089_K10	TB_24H-MOCK_24H	0.302069	0.193535	0.366359	no	0.302069	0.366359	Ubiquitin-conjugating enzyme E2 N (EC 2.3.2.23) (Bendless-like ubiquitin-conjugating enzyme) (E2 ubiquitin-conjugating enzyme N) (Ubc13) (Ubiquitin carrier protein N) (Ubiquitin-protein ligase N)
P61089	Ube2n	UBE2N_MOUSE	P61089_K24	TB_24H-MOCK_24H	0.159324	0.830588	0.899559	no	0.159324	0.899559	Ubiquitin-conjugating enzyme E2 N (EC 2.3.2.23) (Bendless-like ubiquitin-conjugating enzyme) (E2 ubiquitin-conjugating enzyme N) (Ubc13) (Ubiquitin carrier protein N) (Ubiquitin-protein ligase N)
P61089	Ube2n	UBE2N_MOUSE	P61089_K74	TB_24H-MOCK_24H	-0.337076	0.658487	0.785841	no	-0.337076	0.785841	Ubiquitin-conjugating enzyme E2 N (EC 2.3.2.23) (Bendless-like ubiquitin-conjugating enzyme) (E2 ubiquitin-conjugating enzyme N) (Ubc13) (Ubiquitin carrier protein N) (Ubiquitin-protein ligase N)
P61089	Ube2n	UBE2N_MOUSE	P61089_K82	TB_24H-MOCK_24H	-1.04697	0.0273164	0.0889161	no	-1.04697	0.0889161	Ubiquitin-conjugating enzyme E2 N (EC 2.3.2.23) (Bendless-like ubiquitin-conjugating enzyme) (E2 ubiquitin-conjugating enzyme N) (Ubc13) (Ubiquitin carrier protein N) (Ubiquitin-protein ligase N)
P61089	Ube2n	UBE2N_MOUSE	P61089_K92	TB_24H-MOCK_24H	-0.552964	0.609026	0.749858	no	-0.552964	0.749858	Ubiquitin-conjugating enzyme E2 N (EC 2.3.2.23) (Bendless-like ubiquitin-conjugating enzyme) (E2 ubiquitin-conjugating enzyme N) (Ubc13) (Ubiquitin carrier protein N) (Ubiquitin-protein ligase N)
P61089	Ube2n	UBE2N_MOUSE	P61089_K94	TB_24H-MOCK_24H	-0.48977	0.477902	0.657837	no	-0.48977	0.657837	Ubiquitin-conjugating enzyme E2 N (EC 2.3.2.23) (Bendless-like ubiquitin-conjugating enzyme) (E2 ubiquitin-conjugating enzyme N) (Ubc13) (Ubiquitin carrier protein N) (Ubiquitin-protein ligase N)
P61161	Actr2	ARP2_MOUSE	P61161_K7	TB_24H-MOCK_24H	-0.304011	0.738073	0.842155	no	-0.304011	0.842155	Actin-related protein 2 (Actin-like protein 2)
P61161	Actr2	ARP2_MOUSE	P61161_K118	TB_24H-MOCK_24H	1.12964	0.00125248	0.0078502	no	1.12964	0.0078502	Actin-related protein 2 (Actin-like protein 2)
P61161	Actr2	ARP2_MOUSE	P61161_K106	TB_24H-MOCK_24H	1.9324	1.4515e-05	0.000180809	no	1.9324	0.000180809	Actin-related protein 2 (Actin-like protein 2)
P61161	Actr2	ARP2_MOUSE	P61161_K336	TB_24H-MOCK_24H	0.463053	0.40701	0.590128	no	0.463053	0.590128	Actin-related protein 2 (Actin-like protein 2)
P61161	Actr2	ARP2_MOUSE	P61161_K322	TB_24H-MOCK_24H	0.458008	0.46212	0.641968	no	0.458008	0.641968	Actin-related protein 2 (Actin-like protein 2)
P61222	Abce1	ABCE1_MOUSE	P61222_K121	TB_24H-MOCK_24H	0.0932546	0.885307	0.933383	no	0.0932546	0.933383	ATP-binding cassette sub-family E member 1 (RNase L inhibitor) (Ribonuclease 4 inhibitor) (RNS4I)
P61222	Abce1	ABCE1_MOUSE	P61222_K210	TB_24H-MOCK_24H	0.750961	0.409612	0.593359	no	0.750961	0.593359	ATP-binding cassette sub-family E member 1 (RNase L inhibitor) (Ribonuclease 4 inhibitor) (RNS4I)
P61290	Psme3	PSME3_MOUSE	P61290_K132	TB_24H-MOCK_24H	0.230099	0.502693	0.67347	no	0.230099	0.67347	Proteasome activator complex subunit 3 (11S regulator complex subunit gamma) (REG-gamma) (Activator of multicatalytic protease subunit 3) (Ki nuclear autoantigen) (Proteasome activator 28 subunit gamma) (PA28g) (PA28gamma)
P61759	Vbp1	PFD3_MOUSE	P61759_K81	TB_24H-MOCK_24H	-0.698001	0.478089	0.657837	no	-0.698001	0.657837	Prefoldin subunit 3 (Von Hippel-Lindau-binding protein 1) (VBP-1) (VHL-binding protein 1)
P61957	Sumo2	SUMO2_MOUSE	P61957_K42,Q9Z172_K41	TB_24H-MOCK_24H	2.32531	1.1645e-05	0.000149507	no	2.32531	0.000149507	Small ubiquitin-related modifier 2 (SUMO-2) (SMT3 homolog 2) (Ubiquitin-like protein SMT3B) (Smt3B)
P61957	Sumo2	SUMO2_MOUSE	P61957_K5	TB_24H-MOCK_24H	0.653068	0.344006	0.528936	no	0.653068	0.528936	Small ubiquitin-related modifier 2 (SUMO-2) (SMT3 homolog 2) (Ubiquitin-like protein SMT3B) (Smt3B)
P61957	Sumo2	SUMO2_MOUSE	P61957_K35,Q9Z172_K34	TB_24H-MOCK_24H	-1.89063	0.00986556	0.0415502	no	-1.89063	0.0415502	Small ubiquitin-related modifier 2 (SUMO-2) (SMT3 homolog 2) (Ubiquitin-like protein SMT3B) (Smt3B)
P61957	Sumo2	SUMO2_MOUSE	P61957_K33,Q9Z172_K32	TB_24H-MOCK_24H	1.84545	0.109829	0.242507	no	1.84545	0.242507	Small ubiquitin-related modifier 2 (SUMO-2) (SMT3 homolog 2) (Ubiquitin-like protein SMT3B) (Smt3B)
P61957	Sumo2	SUMO2_MOUSE	P61957_K45,Q9Z172_K44	TB_24H-MOCK_24H	0.525562	0.073867	0.183172	no	0.525562	0.183172	Small ubiquitin-related modifier 2 (SUMO-2) (SMT3 homolog 2) (Ubiquitin-like protein SMT3B) (Smt3B)
P61979	Hnrnpk	HNRPK_MOUSE	P61979_K63	TB_24H-MOCK_24H	-1.44756	0.000459478	0.00341818	no	-1.44756	0.00341818	Heterogeneous nuclear ribonucleoprotein K (hnRNP K)
P61979	Hnrnpk	HNRPK_MOUSE	P61979_K163	TB_24H-MOCK_24H	0.0710758	0.894346	0.936821	no	0.0710758	0.936821	Heterogeneous nuclear ribonucleoprotein K (hnRNP K)
P61979	Hnrnpk	HNRPK_MOUSE	P61979_K52	TB_24H-MOCK_24H	-0.206303	0.660119	0.786021	no	-0.206303	0.786021	Heterogeneous nuclear ribonucleoprotein K (hnRNP K)
P61979	Hnrnpk	HNRPK_MOUSE	P61979_K168	TB_24H-MOCK_24H	-0.113541	0.875012	0.926209	no	-0.113541	0.926209	Heterogeneous nuclear ribonucleoprotein K (hnRNP K)
P61979	Hnrnpk	HNRPK_MOUSE	P61979_K60	TB_24H-MOCK_24H	-0.802233	0.122806	0.264557	no	-0.802233	0.264557	Heterogeneous nuclear ribonucleoprotein K (hnRNP K)
P61979	Hnrnpk	HNRPK_MOUSE	P61979_K405	TB_24H-MOCK_24H	-1.09276	0.0204408	0.0712072	no	-1.09276	0.0712072	Heterogeneous nuclear ribonucleoprotein K (hnRNP K)
P61982	Ywhag	1433G_MOUSE	Q9CQV8_K51,P63101_K49,P61982_K50,P68510_K50	TB_24H-MOCK_24H	0.580538	0.104721	0.237827	no	0.580538	0.237827	14-3-3 protein gamma [Cleaved into: 14-3-3 protein gamma, N-terminally processed]
P61982	Ywhag	1433G_MOUSE	P61982_K10	TB_24H-MOCK_24H	0.499102	0.105194	0.238221	no	0.499102	0.238221	14-3-3 protein gamma [Cleaved into: 14-3-3 protein gamma, N-terminally processed]
P62082	Rps7	RS7_MOUSE	P62082_K74	TB_24H-MOCK_24H	1.07975	3.79058e-05	0.000402306	no	1.07975	0.000402306	40S ribosomal protein S7
P62082	Rps7	RS7_MOUSE	P62082_K85	TB_24H-MOCK_24H	-0.824282	0.36944	0.556879	no	-0.824282	0.556879	40S ribosomal protein S7
P62082	Rps7	RS7_MOUSE	P62082_K155	TB_24H-MOCK_24H	-0.551945	0.243364	0.429117	no	-0.551945	0.429117	40S ribosomal protein S7
P62192	Psmc1	PRS4_MOUSE	P62192_K237	TB_24H-MOCK_24H	1.15418	0.0534942	0.148604	no	1.15418	0.148604	26S protease regulatory subunit 4 (P26s4) (26S proteasome AAA-ATPase subunit RPT2) (Proteasome 26S subunit ATPase 1)
P62192	Psmc1	PRS4_MOUSE	P62192_K64	TB_24H-MOCK_24H	-2.36027	0.119016	0.25849	no	-2.36027	0.25849	26S protease regulatory subunit 4 (P26s4) (26S proteasome AAA-ATPase subunit RPT2) (Proteasome 26S subunit ATPase 1)
P62259	Ywhae	1433E_MOUSE	P62259_K50	TB_24H-MOCK_24H	0.562667	0.278787	0.464946	no	0.562667	0.464946	14-3-3 protein epsilon (14-3-3E)
P62264	Rps14	RS14_MOUSE	P62264_K106	TB_24H-MOCK_24H	1.55215	0.00115547	0.00738755	no	1.55215	0.00738755	40S ribosomal protein S14
P62270	Rps18	RS18_MOUSE	P62270_K54	TB_24H-MOCK_24H	0.0864979	0.865386	0.922505	no	0.0864979	0.922505	40S ribosomal protein S18 (Ke-3) (Ke3)
P62281	Rps11	RS11_MOUSE	P62281_K144	TB_24H-MOCK_24H	-0.594855	0.252281	0.439903	no	-0.594855	0.439903	40S ribosomal protein S11
P62301	Rps13	RS13_MOUSE	P62301_K43	TB_24H-MOCK_24H	0.0852712	0.874531	0.926209	no	0.0852712	0.926209	40S ribosomal protein S13
P62334	Psmc6	PRS10_MOUSE	P62334_K314	TB_24H-MOCK_24H	1.42031	4.1034e-05	0.000429777	no	1.42031	0.000429777	26S protease regulatory subunit 10B (26S proteasome AAA-ATPase subunit RPT4) (Proteasome 26S subunit ATPase 6) (Proteasome subunit p42)
P62334	Psmc6	PRS10_MOUSE	P62334_K91	TB_24H-MOCK_24H	0.232388	0.779868	0.864589	no	0.232388	0.864589	26S protease regulatory subunit 10B (26S proteasome AAA-ATPase subunit RPT4) (Proteasome 26S subunit ATPase 6) (Proteasome subunit p42)
P62702	Rps4x	RS4X_MOUSE	P62702_K106	TB_24H-MOCK_24H	-0.884703	0.0412851	0.12149	no	-0.884703	0.12149	40S ribosomal protein S4, X isoform
P62717	Rpl18a	RL18A_MOUSE	P62717_K136	TB_24H-MOCK_24H	-0.239338	0.29644	0.48453	no	-0.239338	0.48453	60S ribosomal protein L18a
P62717	Rpl18a	RL18A_MOUSE	P62717_K11	TB_24H-MOCK_24H	-0.617505	0.053153	0.147936	no	-0.617505	0.147936	60S ribosomal protein L18a
P62751	Rpl23a	RL23A_MOUSE	P62751_K20	TB_24H-MOCK_24H	#NUM!		0	yes	2.05165	0.0107259	60S ribosomal protein L23a
P62751	Rpl23a	RL23A_MOUSE	P62751_K18	TB_24H-MOCK_24H	-0.470922	0.468016	0.647333	no	-0.470922	0.647333	60S ribosomal protein L23a
P62806	Hist1h4a; Hist1h4b; Hist1h4c; Hist1h4d; Hist1h4f; Hist1h4h; Hist1h4i; Hist1h4j; Hist1h4k; Hist1h4m; Hist2h4a; Hist4h4	H4_MOUSE	P62806_K17	TB_24H-MOCK_24H	-1.25457	0.0697763	0.177211	no	-1.25457	0.177211	Histone H4
P62806	Hist1h4a; Hist1h4b; Hist1h4c; Hist1h4d; Hist1h4f; Hist1h4h; Hist1h4i; Hist1h4j; Hist1h4k; Hist1h4m; Hist2h4a; Hist4h4	H4_MOUSE	P62806_K9	TB_24H-MOCK_24H	-0.0826502	0.918499	0.950889	no	-0.0826502	0.950889	Histone H4
P62806	Hist1h4a; Hist1h4b; Hist1h4c; Hist1h4d; Hist1h4f; Hist1h4h; Hist1h4i; Hist1h4j; Hist1h4k; Hist1h4m; Hist2h4a; Hist4h4	H4_MOUSE	P62806_K32	TB_24H-MOCK_24H	-3.28427	3.44614e-08	1.33811e-06	no	-3.28427	1.33811e-06	Histone H4
P62806	Hist1h4a; Hist1h4b; Hist1h4c; Hist1h4d; Hist1h4f; Hist1h4h; Hist1h4i; Hist1h4j; Hist1h4k; Hist1h4m; Hist2h4a; Hist4h4	H4_MOUSE	P62806_K78	TB_24H-MOCK_24H	-0.897214	0.137164	0.291343	no	-0.897214	0.291343	Histone H4
P62806	Hist1h4a; Hist1h4b; Hist1h4c; Hist1h4d; Hist1h4f; Hist1h4h; Hist1h4i; Hist1h4j; Hist1h4k; Hist1h4m; Hist2h4a; Hist4h4	H4_MOUSE	P62806_K92	TB_24H-MOCK_24H	-1.31985	0.0459389	0.132686	no	-1.31985	0.132686	Histone H4
P62814	Atp6v1b2	VATB2_MOUSE	P62814_K108	TB_24H-MOCK_24H	-0.427967	0.136212	0.289905	no	-0.427967	0.289905	V-type proton ATPase subunit B, brain isoform (V-ATPase subunit B 2) (Endomembrane proton pump 58 kDa subunit) (Vacuolar proton pump subunit B 2)
P62814	Atp6v1b2	VATB2_MOUSE	P62814_K137	TB_24H-MOCK_24H	0.471494	0.492264	0.668672	no	0.471494	0.668672	V-type proton ATPase subunit B, brain isoform (V-ATPase subunit B 2) (Endomembrane proton pump 58 kDa subunit) (Vacuolar proton pump subunit B 2)
P62821	Rab1A	RAB1A_MOUSE	P62821_K132	TB_24H-MOCK_24H	-0.289296	0.31411	0.503835	no	-0.289296	0.503835	Ras-related protein Rab-1A (YPT1-related protein)
P62821	Rab1A	RAB1A_MOUSE	P62821_K125	TB_24H-MOCK_24H	#NUM!		0	yes	5.07591	0.0445716	Ras-related protein Rab-1A (YPT1-related protein)
P62821	Rab1A	RAB1A_MOUSE	P62821_K131	TB_24H-MOCK_24H	-0.898164	0.426145	0.609925	no	-0.898164	0.609925	Ras-related protein Rab-1A (YPT1-related protein)
P62830	Rpl23	RL23_MOUSE	P62830_K43	TB_24H-MOCK_24H	#NUM!		0	yes	2.66432	0.0398967	60S ribosomal protein L23
P62843	Rps15	RS15_MOUSE	P62843_K58	TB_24H-MOCK_24H	0.723468	0.17031	0.337231	no	0.723468	0.337231	40S ribosomal protein S15 (RIG protein)
P62849	Rps24	RS24_MOUSE	P62849_K84	TB_24H-MOCK_24H	0.0867071	0.862792	0.92062	no	0.0867071	0.92062	40S ribosomal protein S24
P62849	Rps24	RS24_MOUSE	P62849_K21	TB_24H-MOCK_24H	0.219551	0.827979	0.899142	no	0.219551	0.899142	40S ribosomal protein S24
P62849	Rps24	RS24_MOUSE	P62849_K88	TB_24H-MOCK_24H	1.28517	0.200199	0.375047	no	1.28517	0.375047	40S ribosomal protein S24
P62849	Rps24	RS24_MOUSE	P62849_K83	TB_24H-MOCK_24H	1.19437	0.0614455	0.162685	no	1.19437	0.162685	40S ribosomal protein S24
P62852	Rps25	RS25_MOUSE	P62852_K66	TB_24H-MOCK_24H	#NUM!		0	yes	2.51319	0.0314888	40S ribosomal protein S25
P62852	Rps25	RS25_MOUSE	P62852_K98	TB_24H-MOCK_24H	-0.590473	0.041821	0.122686	no	-0.590473	0.122686	40S ribosomal protein S25
P62858	Rps28	RS28_MOUSE	P62858_K16	TB_24H-MOCK_24H	-0.862412	0.00329294	0.0177405	no	-0.862412	0.0177405	40S ribosomal protein S28
P62862	Fau	RS30_MOUSE	P62862_K51	TB_24H-MOCK_24H	-0.524528	0.381144	0.568468	no	-0.524528	0.568468	40S ribosomal protein S30
P62874	Gnb1	GBB1_MOUSE	P62874_K23	TB_24H-MOCK_24H	0.795143	0.0708249	0.178125	no	0.795143	0.178125	Guanine nucleotide-binding protein G(I)/G(S)/G(T) subunit beta-1 (Transducin beta chain 1)
P62889	Rpl30	RL30_MOUSE	P62889_K26	TB_24H-MOCK_24H	-0.0877535	0.890828	0.936141	no	-0.0877535	0.936141	60S ribosomal protein L30
P62889	Rpl30	RL30_MOUSE	P62889_K23	TB_24H-MOCK_24H	0.922769	0.29842	0.486269	no	0.922769	0.486269	60S ribosomal protein L30
P62908	Rps3	RS3_MOUSE	P62908_K62	TB_24H-MOCK_24H	-0.280119	0.721284	0.829086	no	-0.280119	0.829086	40S ribosomal protein S3 (EC 4.2.99.18)
P62908	Rps3	RS3_MOUSE	P62908_K75	TB_24H-MOCK_24H	-0.696532	0.595523	0.738237	no	-0.696532	0.738237	40S ribosomal protein S3 (EC 4.2.99.18)
P62908	Rps3	RS3_MOUSE	P62908_K230	TB_24H-MOCK_24H	-0.974111	0.0121187	0.0488431	no	-0.974111	0.0488431	40S ribosomal protein S3 (EC 4.2.99.18)
P62908	Rps3	RS3_MOUSE	P62908_K7	TB_24H-MOCK_24H	-0.172035	0.404004	0.587964	no	-0.172035	0.587964	40S ribosomal protein S3 (EC 4.2.99.18)
P62908	Rps3	RS3_MOUSE	P62908_K141	TB_24H-MOCK_24H	-0.252347	0.297073	0.485068	no	-0.252347	0.485068	40S ribosomal protein S3 (EC 4.2.99.18)
P62960	Ybx1	YBOX1_MOUSE	P62960_K91,Q9JKB3_K117	TB_24H-MOCK_24H	-2.53835	0.0509483	0.143812	no	-2.53835	0.143812	Nuclease-sensitive element-binding protein 1 (CCAAT-binding transcription factor I subunit A) (CBF-A) (DNA-binding protein B) (DBPB) (Enhancer factor I subunit A) (EFI-A) (Y-box transcription factor) (Y-box-binding protein 1) (YB-1)
P62962	Pfn1	PROF1_MOUSE	P62962_K54	TB_24H-MOCK_24H	-0.459533	0.187792	0.359332	no	-0.459533	0.359332	Profilin-1 (Profilin I)
P62962	Pfn1	PROF1_MOUSE	P62962_K116	TB_24H-MOCK_24H	-0.905293	0.093428	0.217771	no	-0.905293	0.217771	Profilin-1 (Profilin I)
P62962	Pfn1	PROF1_MOUSE	P62962_K127	TB_24H-MOCK_24H	-0.244842	0.775391	0.861425	no	-0.244842	0.861425	Profilin-1 (Profilin I)
P62962	Pfn1	PROF1_MOUSE	P62962_K126	TB_24H-MOCK_24H	-0.0892776	0.903906	0.941293	no	-0.0892776	0.941293	Profilin-1 (Profilin I)
P62983	Rps27a	RS27A_MOUSE	P62983_K113	TB_24H-MOCK_24H	0.821904	0.508547	0.673872	no	0.821904	0.673872	Ubiquitin-40S ribosomal protein S27a (Ubiquitin carboxyl extension protein 80) [Cleaved into: Ubiquitin; 40S ribosomal protein S27a]
P62984	Uba52	RL40_MOUSE	P62984_K88	TB_24H-MOCK_24H	-0.938074	0.00827266	0.0358652	no	-0.938074	0.0358652	Ubiquitin-60S ribosomal protein L40 (Ubiquitin A-52 residue ribosomal protein fusion product 1) [Cleaved into: Ubiquitin; 60S ribosomal protein L40 (CEP52)]
P63001	Rac1	RAC1_MOUSE	P63001_K153	TB_24H-MOCK_24H	-0.363707	0.337286	0.524374	no	-0.363707	0.524374	Ras-related C3 botulinum toxin substrate 1 (p21-Rac1)
P63001	Rac1	RAC1_MOUSE	P63001_K183	TB_24H-MOCK_24H	-0.174921	0.592643	0.736524	no	-0.174921	0.736524	Ras-related C3 botulinum toxin substrate 1 (p21-Rac1)
P63017	Hspa8	HSP7C_MOUSE	P63017_K325	TB_24H-MOCK_24H	0.00460956	0.983989	0.989584	no	0.00460956	0.989584	Heat shock cognate 71 kDa protein (Heat shock 70 kDa protein 8)
P63017	Hspa8	HSP7C_MOUSE	P63017_K159	TB_24H-MOCK_24H	2.33078	1.18883e-07	3.50704e-06	no	2.33078	3.50704e-06	Heat shock cognate 71 kDa protein (Heat shock 70 kDa protein 8)
P63017	Hspa8	HSP7C_MOUSE	P63017_K188	TB_24H-MOCK_24H	0.778269	0.0528325	0.14756	no	0.778269	0.14756	Heat shock cognate 71 kDa protein (Heat shock 70 kDa protein 8)
P63017	Hspa8	HSP7C_MOUSE	P63017_K319	TB_24H-MOCK_24H	0.387147	0.467951	0.647333	no	0.387147	0.647333	Heat shock cognate 71 kDa protein (Heat shock 70 kDa protein 8)
P63017	Hspa8	HSP7C_MOUSE	P63017_K71	TB_24H-MOCK_24H	1.45394	3.50167e-06	5.63096e-05	no	1.45394	5.63096e-05	Heat shock cognate 71 kDa protein (Heat shock 70 kDa protein 8)
P63017	Hspa8	HSP7C_MOUSE	P63017_K108	TB_24H-MOCK_24H	1.90748	0.00394502	0.0201945	no	1.90748	0.0201945	Heat shock cognate 71 kDa protein (Heat shock 70 kDa protein 8)
P63017	Hspa8	HSP7C_MOUSE	P63017_K345	TB_24H-MOCK_24H	-0.347626	0.787162	0.869647	no	-0.347626	0.869647	Heat shock cognate 71 kDa protein (Heat shock 70 kDa protein 8)
P63017	Hspa8	HSP7C_MOUSE	P63017_K512	TB_24H-MOCK_24H	0.37402	0.746144	0.847497	no	0.37402	0.847497	Heat shock cognate 71 kDa protein (Heat shock 70 kDa protein 8)
P63017	Hspa8	HSP7C_MOUSE	P63017_K126	TB_24H-MOCK_24H	#NUM!		0	yes	4.42079	0.0223082	Heat shock cognate 71 kDa protein (Heat shock 70 kDa protein 8)
P63017	Hspa8	HSP7C_MOUSE	P63017_K3	TB_24H-MOCK_24H	-0.715169	0.507428	0.673872	no	-0.715169	0.673872	Heat shock cognate 71 kDa protein (Heat shock 70 kDa protein 8)
P63017	Hspa8	HSP7C_MOUSE	P63017_K56	TB_24H-MOCK_24H	2.815	6.62171e-10	4.22997e-08	no	2.815	4.22997e-08	Heat shock cognate 71 kDa protein (Heat shock 70 kDa protein 8)
P63017	Hspa8	HSP7C_MOUSE	P63017_K246	TB_24H-MOCK_24H	0.446855	0.360986	0.546802	no	0.446855	0.546802	Heat shock cognate 71 kDa protein (Heat shock 70 kDa protein 8)
P63017	Hspa8	HSP7C_MOUSE	P63017_K187	TB_24H-MOCK_24H	1.34367	0.0039883	0.0203506	no	1.34367	0.0203506	Heat shock cognate 71 kDa protein (Heat shock 70 kDa protein 8)
P63028	Tpt1	TCTP_MOUSE	P63028_K102	TB_24H-MOCK_24H	#NUM!		0	yes	4.97252	0.0202663	Translationally-controlled tumor protein (TCTP) (21 kDa polypeptide) (p21) (p23)
P63038	Hspd1	CH60_MOUSE	P63038_K233	TB_24H-MOCK_24H	-0.734171	0.0921367	0.216026	no	-0.734171	0.216026	60 kDa heat shock protein, mitochondrial (60 kDa chaperonin) (Chaperonin 60) (CPN60) (HSP-65) (Heat shock protein 60) (HSP-60) (Hsp60) (Mitochondrial matrix protein P1)
P63094	Gnas	GNAS2_MOUSE	P63094_K8	TB_24H-MOCK_24H	-1.00276	0.1451	0.302222	no	-1.00276	0.302222	Guanine nucleotide-binding protein G(s) subunit alpha isoforms short (Adenylate cyclase-stimulating G alpha protein)
P63101	Ywhaz	1433Z_MOUSE	P63101_K11	TB_24H-MOCK_24H	0.201811	0.486223	0.663297	no	0.201811	0.663297	14-3-3 protein zeta/delta (Protein kinase C inhibitor protein 1) (KCIP-1) (SEZ-2)
P63101	Ywhaz	1433Z_MOUSE	P63101_K9	TB_24H-MOCK_24H	0.197734	0.688097	0.806665	no	0.197734	0.806665	14-3-3 protein zeta/delta (Protein kinase C inhibitor protein 1) (KCIP-1) (SEZ-2)
P63101	Ywhaz	1433Z_MOUSE	P63101_K115	TB_24H-MOCK_24H	#NUM!		0	yes	5.57947	0.0186348	14-3-3 protein zeta/delta (Protein kinase C inhibitor protein 1) (KCIP-1) (SEZ-2)
P63242	Eif5a	IF5A1_MOUSE	Q8BGY2_K34,P63242_K34	TB_24H-MOCK_24H	-0.52391	0.221459	0.40064	no	-0.52391	0.40064	Eukaryotic translation initiation factor 5A-1 (eIF-5A-1) (eIF-5A1) (Eukaryotic initiation factor 5A isoform 1) (eIF-5A) (eIF-4D)
P63242	Eif5a	IF5A1_MOUSE	Q8BGY2_K39,P63242_K39	TB_24H-MOCK_24H	-0.515317	0.258652	0.446609	no	-0.515317	0.446609	Eukaryotic translation initiation factor 5A-1 (eIF-5A-1) (eIF-5A1) (Eukaryotic initiation factor 5A isoform 1) (eIF-5A) (eIF-4D)
P63276	Rps17	RS17_MOUSE	P63276_K32	TB_24H-MOCK_24H	-0.957903	0.0194644	0.0682541	no	-0.957903	0.0682541	40S ribosomal protein S17
P63276	Rps17	RS17_MOUSE	P63276_K19	TB_24H-MOCK_24H	-1.72306	0.326599	0.517359	no	-1.72306	0.517359	40S ribosomal protein S17
P63323	Rps12	RS12_MOUSE	P63323_K129	TB_24H-MOCK_24H	0.567309	0.700044	0.813735	no	0.567309	0.813735	40S ribosomal protein S12
P63325	Rps10	RS10_MOUSE	P63325_K139	TB_24H-MOCK_24H	-1.68415	0.0730776	0.18202	no	-1.68415	0.18202	40S ribosomal protein S10
P63325	Rps10	RS10_MOUSE	P63325_K138	TB_24H-MOCK_24H	-0.247281	0.66385	0.786932	no	-0.247281	0.786932	40S ribosomal protein S10
P63325	Rps10	RS10_MOUSE	P63325_K138,P63325_K139	TB_24H-MOCK_24H	0.767738	0.24942	0.436828	no	0.767738	0.436828	40S ribosomal protein S10
P67871	Csnk2b	CSK2B_MOUSE	P67871_K212	TB_24H-MOCK_24H	2.13714	0.113255	0.249379	no	2.13714	0.249379	Casein kinase II subunit beta (CK II beta) (Phosvitin)
P68037	Ube2l3	UB2L3_MOUSE	P68037_K145	TB_24H-MOCK_24H	-2.26227	0.0957109	0.222116	no	-2.26227	0.222116	Ubiquitin-conjugating enzyme E2 L3 (EC 2.3.2.23) (E2 ubiquitin-conjugating enzyme L3) (UbcM4) (Ubiquitin carrier protein L3) (Ubiquitin-protein ligase L3)
P68037	Ube2l3	UB2L3_MOUSE	P68037_K20	TB_24H-MOCK_24H	-0.821739	0.140896	0.295529	no	-0.821739	0.295529	Ubiquitin-conjugating enzyme E2 L3 (EC 2.3.2.23) (E2 ubiquitin-conjugating enzyme L3) (UbcM4) (Ubiquitin carrier protein L3) (Ubiquitin-protein ligase L3)
P68037	Ube2l3	UB2L3_MOUSE	P68037_K73	TB_24H-MOCK_24H	-0.748593	0.25375	0.441015	no	-0.748593	0.441015	Ubiquitin-conjugating enzyme E2 L3 (EC 2.3.2.23) (E2 ubiquitin-conjugating enzyme L3) (UbcM4) (Ubiquitin carrier protein L3) (Ubiquitin-protein ligase L3)
P68037	Ube2l3	UB2L3_MOUSE	P68037_K146	TB_24H-MOCK_24H	-0.306938	0.77394	0.861425	no	-0.306938	0.861425	Ubiquitin-conjugating enzyme E2 L3 (EC 2.3.2.23) (E2 ubiquitin-conjugating enzyme L3) (UbcM4) (Ubiquitin carrier protein L3) (Ubiquitin-protein ligase L3)
P68037	Ube2l3	UB2L3_MOUSE	P68037_K82	TB_24H-MOCK_24H	-0.860494	0.339505	0.526282	no	-0.860494	0.526282	Ubiquitin-conjugating enzyme E2 L3 (EC 2.3.2.23) (E2 ubiquitin-conjugating enzyme L3) (UbcM4) (Ubiquitin carrier protein L3) (Ubiquitin-protein ligase L3)
P68037	Ube2l3	UB2L3_MOUSE	P68037_K138	TB_24H-MOCK_24H	0.309098	0.605213	0.74632	no	0.309098	0.74632	Ubiquitin-conjugating enzyme E2 L3 (EC 2.3.2.23) (E2 ubiquitin-conjugating enzyme L3) (UbcM4) (Ubiquitin carrier protein L3) (Ubiquitin-protein ligase L3)
P68040	Rack1	RACK1_MOUSE	P68040_K185	TB_24H-MOCK_24H	-0.314334	0.653045	0.78169	no	-0.314334	0.78169	Receptor of activated protein C kinase 1 (12-3) (Guanine nucleotide-binding protein subunit beta-2-like 1) (Receptor for activated C kinase) (Receptor of activated protein kinase C 1) (p205) [Cleaved into: Receptor of activated protein C kinase 1, N-terminally processed (Guanine nucleotide-binding protein subunit beta-2-like 1, N-terminally processed)]
P68040	Rack1	RACK1_MOUSE	P68040_K106	TB_24H-MOCK_24H	-1.50997	0.062614	0.165183	no	-1.50997	0.165183	Receptor of activated protein C kinase 1 (12-3) (Guanine nucleotide-binding protein subunit beta-2-like 1) (Receptor for activated C kinase) (Receptor of activated protein kinase C 1) (p205) [Cleaved into: Receptor of activated protein C kinase 1, N-terminally processed (Guanine nucleotide-binding protein subunit beta-2-like 1, N-terminally processed)]
P68254	Ywhaq	1433T_MOUSE	P68254_K9	TB_24H-MOCK_24H	-0.307924	0.587187	0.732603	no	-0.307924	0.732603	14-3-3 protein theta (14-3-3 protein tau)
P68254	Ywhaq	1433T_MOUSE	P68254_K11	TB_24H-MOCK_24H	0.0912091	0.888942	0.935357	no	0.0912091	0.935357	14-3-3 protein theta (14-3-3 protein tau)
P68404	Prkcb	KPCB_MOUSE	P68404_K327	TB_24H-MOCK_24H	-0.167943	0.661788	0.786831	no	-0.167943	0.786831	Protein kinase C beta type (PKC-B) (PKC-beta) (EC 2.7.11.13)
P68404	Prkcb	KPCB_MOUSE	P68404_K315	TB_24H-MOCK_24H	-0.0777218	0.851212	0.913776	no	-0.0777218	0.913776	Protein kinase C beta type (PKC-B) (PKC-beta) (EC 2.7.11.13)
P68433	Hist1h3a; Hist1h3g; Hist1h3h; Hist1h3i	H31_MOUSE	P84228_K19,P84228_K24,P68433_K19,P68433_K24,P84244_K19,P84244_K24	TB_24H-MOCK_24H	-5.56171	4.39271e-12	8.74149e-10	no	-5.56171	8.74149e-10	Histone H3.1
P68433	Hist1h3a; Hist1h3g; Hist1h3h; Hist1h3i	H31_MOUSE	P84228_K38,P68433_K38	TB_24H-MOCK_24H	-2.17833	0.000496213	0.00365728	no	-2.17833	0.00365728	Histone H3.1
P68433	Hist1h3a; Hist1h3g; Hist1h3h; Hist1h3i	H31_MOUSE	P84228_K37,P68433_K37	TB_24H-MOCK_24H	-2.40636	9.58406e-05	0.000924717	no	-2.40636	0.000924717	Histone H3.1
P68433	Hist1h3a; Hist1h3g; Hist1h3h; Hist1h3i	H31_MOUSE	P84228_K28,P68433_K28	TB_24H-MOCK_24H	-2.5075	1.9076e-05	0.000221671	no	-2.5075	0.000221671	Histone H3.1
P68433	Hist1h3a; Hist1h3g; Hist1h3h; Hist1h3i	H31_MOUSE	P84228_K24,P68433_K24,P84244_K24	TB_24H-MOCK_24H	-2.36279	0.00415413	0.0209948	no	-2.36279	0.0209948	Histone H3.1
P70168	Kpnb1	IMB1_MOUSE	P70168_K73	TB_24H-MOCK_24H	0.328965	0.625311	0.763417	no	0.328965	0.763417	Importin subunit beta-1 (Karyopherin subunit beta-1) (Nuclear factor p97) (Pore targeting complex 97 kDa subunit) (PTAC97) (SCG)
P70168	Kpnb1	IMB1_MOUSE	P70168_K62	TB_24H-MOCK_24H	0.0780007	0.924075	0.953421	no	0.0780007	0.953421	Importin subunit beta-1 (Karyopherin subunit beta-1) (Nuclear factor p97) (Pore targeting complex 97 kDa subunit) (PTAC97) (SCG)
P70182	Pip5k1a	PI51A_MOUSE	P70182_K88	TB_24H-MOCK_24H	-0.120745	0.893374	0.936821	no	-0.120745	0.936821	Phosphatidylinositol 4-phosphate 5-kinase type-1 alpha (PIP5K1-alpha) (PtdIns(4)P-5-kinase 1 alpha) (EC 2.7.1.68) (68 kDa type I phosphatidylinositol 4-phosphate 5-kinase) (Phosphatidylinositol 4-phosphate 5-kinase type I alpha) (PIP5KIalpha) (Phosphatidylinositol 4-phosphate 5-kinase type I beta) (PI4P5KIbeta)
P70248	Myo1f	MYO1F_MOUSE	P70248_K857	TB_24H-MOCK_24H	1.35356	0.000294248	0.00233056	no	1.35356	0.00233056	Unconventional myosin-If
P70248	Myo1f	MYO1F_MOUSE	P70248_K186	TB_24H-MOCK_24H	0.777584	0.04208	0.123146	no	0.777584	0.123146	Unconventional myosin-If
P70290	Mpp1	EM55_MOUSE	P70290_K4	TB_24H-MOCK_24H	0.17398	0.695302	0.812718	no	0.17398	0.812718	55 kDa erythrocyte membrane protein (p55) (Membrane protein, palmitoylated 1)
P70290	Mpp1	EM55_MOUSE	P70290_K283	TB_24H-MOCK_24H	1.41228	0.0140898	0.0540506	no	1.41228	0.0540506	55 kDa erythrocyte membrane protein (p55) (Membrane protein, palmitoylated 1)
P70290	Mpp1	EM55_MOUSE	P70290_K91	TB_24H-MOCK_24H	0.192868	0.521068	0.682749	no	0.192868	0.682749	55 kDa erythrocyte membrane protein (p55) (Membrane protein, palmitoylated 1)
P70290	Mpp1	EM55_MOUSE	P70290_K386	TB_24H-MOCK_24H	#NUM!		0	yes	2.76986	0.0122491	55 kDa erythrocyte membrane protein (p55) (Membrane protein, palmitoylated 1)
P70290	Mpp1	EM55_MOUSE	P70290_K141	TB_24H-MOCK_24H	-0.037768	0.940736	0.963739	no	-0.037768	0.963739	55 kDa erythrocyte membrane protein (p55) (Membrane protein, palmitoylated 1)
P70290	Mpp1	EM55_MOUSE	P70290_K29	TB_24H-MOCK_24H	0.395767	0.526575	0.688265	no	0.395767	0.688265	55 kDa erythrocyte membrane protein (p55) (Membrane protein, palmitoylated 1)
P70290	Mpp1	EM55_MOUSE	P70290_K247	TB_24H-MOCK_24H	0.435026	0.0989385	0.228607	no	0.435026	0.228607	55 kDa erythrocyte membrane protein (p55) (Membrane protein, palmitoylated 1)
P70290	Mpp1	EM55_MOUSE	P70290_K248	TB_24H-MOCK_24H	-1.63111	0.202236	0.377002	no	-1.63111	0.377002	55 kDa erythrocyte membrane protein (p55) (Membrane protein, palmitoylated 1)
P70295	Aup1	AUP1_MOUSE	P70295_K250	TB_24H-MOCK_24H	-0.220044	0.517981	0.682749	no	-0.220044	0.682749	Ancient ubiquitous protein 1
P70295	Aup1	AUP1_MOUSE	P70295_K269	TB_24H-MOCK_24H	0.909499	0.0590311	0.157745	no	0.909499	0.157745	Ancient ubiquitous protein 1
P70303	Ctps2	PYRG2_MOUSE	P70303_K100	TB_24H-MOCK_24H	0.464642	0.415681	0.600512	no	0.464642	0.600512	CTP synthase 2 (EC 6.3.4.2) (CTP synthetase 2) (CTPsH) (UTP--ammonia ligase 2)
P70303	Ctps2	PYRG2_MOUSE	P70303_K466	TB_24H-MOCK_24H	-1.03575	0.0553833	0.151617	no	-1.03575	0.151617	CTP synthase 2 (EC 6.3.4.2) (CTP synthetase 2) (CTPsH) (UTP--ammonia ligase 2)
P70333	Hnrnph2	HNRH2_MOUSE	P70333_K35	TB_24H-MOCK_24H	#NUM!		0	yes	5.26064	0.0311357	Heterogeneous nuclear ribonucleoprotein H2 (hnRNP H2) (Heterogeneous nuclear ribonucleoprotein H') (hnRNP H') [Cleaved into: Heterogeneous nuclear ribonucleoprotein H2, N-terminally processed]
P70333	Hnrnph2	HNRH2_MOUSE	P70333_K14	TB_24H-MOCK_24H	1.9264	7.8353e-05	0.000769987	no	1.9264	0.000769987	Heterogeneous nuclear ribonucleoprotein H2 (hnRNP H2) (Heterogeneous nuclear ribonucleoprotein H') (hnRNP H') [Cleaved into: Heterogeneous nuclear ribonucleoprotein H2, N-terminally processed]
P70362	Ufd1l	UFD1_MOUSE	P70362_K267	TB_24H-MOCK_24H	0.565003	0.00448735	0.022255	no	0.565003	0.022255	Ubiquitin fusion degradation protein 1 homolog (UB fusion protein 1)
P70362	Ufd1l	UFD1_MOUSE	P70362_K264	TB_24H-MOCK_24H	-0.0599492	0.7779	0.863008	no	-0.0599492	0.863008	Ubiquitin fusion degradation protein 1 homolog (UB fusion protein 1)
P70398	Usp9x	USP9X_MOUSE	P70398_K1798	TB_24H-MOCK_24H	0.75138	0.077868	0.190717	no	0.75138	0.190717	Probable ubiquitin carboxyl-terminal hydrolase FAF-X (EC 3.4.19.12) (Deubiquitinating enzyme FAF-X) (Fat facets homolog) (Fat facets protein-related, X-linked) (Ubiquitin carboxyl-terminal hydrolase FAM) (Ubiquitin thioesterase FAF-X) (Ubiquitin-specific protease 9, X chromosome) (Ubiquitin-specific-processing protease FAF-X)
P70403	Cux1	CASP_MOUSE	P70403_K439	TB_24H-MOCK_24H	#NUM!		0	yes	-5.94474	0.0247112	Protein CASP
P70429	Evl	EVL_MOUSE	P70429_K346	TB_24H-MOCK_24H	2.93717	0.074314	0.183994	no	2.93717	0.183994	Ena/VASP-like protein (Ena/vasodilator-stimulated phosphoprotein-like)
P70658	Cxcr4	CXCR4_MOUSE	P70658_K334	TB_24H-MOCK_24H	-0.654393	0.00198482	0.0116055	no	-0.654393	0.0116055	C-X-C chemokine receptor type 4 (CXC-R4) (CXCR-4) (Fusin) (Leukocyte-derived seven transmembrane domain receptor) (LESTR) (Pre-B-cell-derived chemokine receptor) (PB-CKR) (Stromal cell-derived factor 1 receptor) (SDF-1 receptor) (CD antigen CD184)
P70670	Naca	NACAM_MOUSE	Q60817_K100,P70670_K2072	TB_24H-MOCK_24H	2.16263	2.05911e-09	1.05745e-07	no	2.16263	1.05745e-07	Nascent polypeptide-associated complex subunit alpha, muscle-specific form (Alpha-NAC, muscle-specific form) (skNAC)
P80313	Cct7	TCPH_MOUSE	P80313_K137	TB_24H-MOCK_24H	2.67332	0.0718914	0.179955	no	2.67332	0.179955	T-complex protein 1 subunit eta (TCP-1-eta) (CCT-eta) [Cleaved into: T-complex protein 1 subunit eta, N-terminally processed]
P80313	Cct7	TCPH_MOUSE	P80313_K135	TB_24H-MOCK_24H	1.38982	0.0131164	0.0515586	no	1.38982	0.0515586	T-complex protein 1 subunit eta (TCP-1-eta) (CCT-eta) [Cleaved into: T-complex protein 1 subunit eta, N-terminally processed]
P80313	Cct7	TCPH_MOUSE	P80313_K368	TB_24H-MOCK_24H	0.757468	0.0637916	0.166759	no	0.757468	0.166759	T-complex protein 1 subunit eta (TCP-1-eta) (CCT-eta) [Cleaved into: T-complex protein 1 subunit eta, N-terminally processed]
P80313	Cct7	TCPH_MOUSE	P80313_K172	TB_24H-MOCK_24H	1.15901	0.00760927	0.0338379	no	1.15901	0.0338379	T-complex protein 1 subunit eta (TCP-1-eta) (CCT-eta) [Cleaved into: T-complex protein 1 subunit eta, N-terminally processed]
P80313	Cct7	TCPH_MOUSE	P80313_K84	TB_24H-MOCK_24H	-0.767918	0.20268	0.377388	no	-0.767918	0.377388	T-complex protein 1 subunit eta (TCP-1-eta) (CCT-eta) [Cleaved into: T-complex protein 1 subunit eta, N-terminally processed]
P80313	Cct7	TCPH_MOUSE	P80313_K366	TB_24H-MOCK_24H	0.993606	0.00784668	0.0345487	no	0.993606	0.0345487	T-complex protein 1 subunit eta (TCP-1-eta) (CCT-eta) [Cleaved into: T-complex protein 1 subunit eta, N-terminally processed]
P80313	Cct7	TCPH_MOUSE	P80313_K77	TB_24H-MOCK_24H	1.33717	0.0697478	0.177211	no	1.33717	0.177211	T-complex protein 1 subunit eta (TCP-1-eta) (CCT-eta) [Cleaved into: T-complex protein 1 subunit eta, N-terminally processed]
P80313	Cct7	TCPH_MOUSE	P80313_K55	TB_24H-MOCK_24H	0.362219	0.00537287	0.0254572	no	0.362219	0.0254572	T-complex protein 1 subunit eta (TCP-1-eta) (CCT-eta) [Cleaved into: T-complex protein 1 subunit eta, N-terminally processed]
P80317	Cct6a	TCPZ_MOUSE	P80317_K530	TB_24H-MOCK_24H	-0.712655	0.0273699	0.0889161	no	-0.712655	0.0889161	T-complex protein 1 subunit zeta (TCP-1-zeta) (CCT-zeta-1)
P80317	Cct6a	TCPZ_MOUSE	P80317_K129	TB_24H-MOCK_24H	1.46273	0.00114757	0.00736665	no	1.46273	0.00736665	T-complex protein 1 subunit zeta (TCP-1-zeta) (CCT-zeta-1)
P80317	Cct6a	TCPZ_MOUSE	P80317_K5	TB_24H-MOCK_24H	0.0917451	0.540164	0.698571	no	0.0917451	0.698571	T-complex protein 1 subunit zeta (TCP-1-zeta) (CCT-zeta-1)
P80317	Cct6a	TCPZ_MOUSE	P80317_K141	TB_24H-MOCK_24H	#NUM!		0	yes	5.5623	0.0331338	T-complex protein 1 subunit zeta (TCP-1-zeta) (CCT-zeta-1)
P80318	Cct3	TCPG_MOUSE	P80318_K78	TB_24H-MOCK_24H	0.0394083	0.93337	0.958661	no	0.0394083	0.958661	T-complex protein 1 subunit gamma (TCP-1-gamma) (CCT-gamma) (Matricin) (mTRiC-P5)
P80318	Cct3	TCPG_MOUSE	P80318_K15	TB_24H-MOCK_24H	-1.00835	0.145826	0.302679	no	-1.00835	0.302679	T-complex protein 1 subunit gamma (TCP-1-gamma) (CCT-gamma) (Matricin) (mTRiC-P5)
P80318	Cct3	TCPG_MOUSE	P80318_K21	TB_24H-MOCK_24H	-0.920175	0.102929	0.234964	no	-0.920175	0.234964	T-complex protein 1 subunit gamma (TCP-1-gamma) (CCT-gamma) (Matricin) (mTRiC-P5)
P84089	Erh	ERH_MOUSE	P84089_K12	TB_24H-MOCK_24H	-1.86038	0.000289526	0.00230463	no	-1.86038	0.00230463	Enhancer of rudimentary homolog (Mer)
P84091	Ap2m1	AP2M1_MOUSE	P84091_K227	TB_24H-MOCK_24H	#NUM!		0	yes	2.35374	0.0415185	AP-2 complex subunit mu (AP-2 mu chain) (Adaptor protein complex AP-2 subunit mu) (Adaptor-related protein complex 2 subunit mu) (Clathrin assembly protein complex 2 mu medium chain) (Clathrin coat assembly protein AP50) (Clathrin coat-associated protein AP50) (Mu2-adaptin) (Plasma membrane adaptor AP-2 50 kDa protein)
P84091	Ap2m1	AP2M1_MOUSE	P84091_K235	TB_24H-MOCK_24H	#NUM!		0	yes	3.27769	0.0331708	AP-2 complex subunit mu (AP-2 mu chain) (Adaptor protein complex AP-2 subunit mu) (Adaptor-related protein complex 2 subunit mu) (Clathrin assembly protein complex 2 mu medium chain) (Clathrin coat assembly protein AP50) (Clathrin coat-associated protein AP50) (Mu2-adaptin) (Plasma membrane adaptor AP-2 50 kDa protein)
P84091	Ap2m1	AP2M1_MOUSE	P84091_K256	TB_24H-MOCK_24H	-0.881388	0.00287428	0.0159004	no	-0.881388	0.0159004	AP-2 complex subunit mu (AP-2 mu chain) (Adaptor protein complex AP-2 subunit mu) (Adaptor-related protein complex 2 subunit mu) (Clathrin assembly protein complex 2 mu medium chain) (Clathrin coat assembly protein AP50) (Clathrin coat-associated protein AP50) (Mu2-adaptin) (Plasma membrane adaptor AP-2 50 kDa protein)
P84096	Rhog	RHOG_MOUSE	P84096_K130	TB_24H-MOCK_24H	-0.273796	0.758688	0.856011	no	-0.273796	0.856011	Rho-related GTP-binding protein RhoG (Sid 10750)
P84096	Rhog	RHOG_MOUSE	P84096_K183	TB_24H-MOCK_24H	0.244297	0.744361	0.84705	no	0.244297	0.84705	Rho-related GTP-binding protein RhoG (Sid 10750)
P84099	Rpl19	RL19_MOUSE	P84099_K196	TB_24H-MOCK_24H	#NUM!		0	yes	-7.1169	0.0336155	60S ribosomal protein L19
P84099	Rpl19	RL19_MOUSE	P84099_K180	TB_24H-MOCK_24H	-2.77181	1.18957e-07	3.50704e-06	no	-2.77181	3.50704e-06	60S ribosomal protein L19
P84099	Rpl19	RL19_MOUSE	P84099_K195	TB_24H-MOCK_24H	-0.560524	0.100202	0.23119	no	-0.560524	0.23119	60S ribosomal protein L19
P86048	Rpl10l	RL10L_MOUSE	Q6ZWV3_K121,P86048_K121	TB_24H-MOCK_24H	1.76127	2.1145e-05	0.000238744	no	1.76127	0.000238744	60S ribosomal protein L10-like
P86048	Rpl10l	RL10L_MOUSE	Q6ZWV3_K101,P86048_K101	TB_24H-MOCK_24H	0.31289	0.623798	0.76249	no	0.31289	0.76249	60S ribosomal protein L10-like
P86048	Rpl10l	RL10L_MOUSE	Q6ZWV3_K74,P86048_K74	TB_24H-MOCK_24H	-0.031972	0.936417	0.959933	no	-0.031972	0.959933	60S ribosomal protein L10-like
P86048	Rpl10l	RL10L_MOUSE	Q6ZWV3_K30,P86048_K30	TB_24H-MOCK_24H	0.422592	0.195687	0.369116	no	0.422592	0.369116	60S ribosomal protein L10-like
P97287	Mcl1	MCL1_MOUSE	P97287_K39	TB_24H-MOCK_24H	0.623594	0.0812676	0.196623	no	0.623594	0.196623	Induced myeloid leukemia cell differentiation protein Mcl-1 homolog (Bcl-2-related protein EAT/mcl1)
P97311	Mcm6	MCM6_MOUSE	P97311_K197	TB_24H-MOCK_24H	-0.51284	0.333711	0.522387	no	-0.51284	0.522387	DNA replication licensing factor MCM6 (EC 3.6.4.12) (Mis5 homolog)
P97351	Rps3a	RS3A_MOUSE	P97351_K46	TB_24H-MOCK_24H	-0.332771	0.505172	0.67347	no	-0.332771	0.67347	40S ribosomal protein S3a (Protein TU-11)
P97351	Rps3a	RS3A_MOUSE	P97351_K144	TB_24H-MOCK_24H	0.348174	0.537615	0.696974	no	0.348174	0.696974	40S ribosomal protein S3a (Protein TU-11)
P97363	Sptlc2	SPTC2_MOUSE	P97363_K21	TB_24H-MOCK_24H	0.737667	0.344173	0.528936	no	0.737667	0.528936	Serine palmitoyltransferase 2 (EC 2.3.1.50) (Long chain base biosynthesis protein 2) (LCB 2) (Long chain base biosynthesis protein 2a) (LCB2a) (Serine-palmitoyl-CoA transferase 2) (SPT 2)
P97372	Psme2	PSME2_MOUSE	P97372_K3	TB_24H-MOCK_24H	-1.14587	0.0161817	0.0596326	no	-1.14587	0.0596326	Proteasome activator complex subunit 2 (11S regulator complex subunit beta) (REG-beta) (Activator of multicatalytic protease subunit 2) (Proteasome activator 28 subunit beta) (PA28b) (PA28beta)
P97390	Vps45	VPS45_MOUSE	P97390_K450	TB_24H-MOCK_24H	-1.44517	0.00539091	0.0254669	no	-1.44517	0.0254669	Vacuolar protein sorting-associated protein 45 (mVps45)
P97429	Anxa4	ANXA4_MOUSE	P97429_K57	TB_24H-MOCK_24H	0.250984	0.789492	0.871013	no	0.250984	0.871013	Annexin A4 (Annexin IV) (Annexin-4)
P97789	Xrn1	XRN1_MOUSE	P97789_K736	TB_24H-MOCK_24H	0.578296	0.425989	0.609925	no	0.578296	0.609925	5'-3' exoribonuclease 1 (mXRN1) (EC 3.1.13.-) (Protein Dhm2) (Strand-exchange protein 1 homolog)
P97797	Sirpa	SHPS1_MOUSE	P97797_K417	TB_24H-MOCK_24H	-1.80297	0.000180934	0.00157403	no	-1.80297	0.00157403	Tyrosine-protein phosphatase non-receptor type substrate 1 (SHP substrate 1) (SHPS-1) (Brain Ig-like molecule with tyrosine-based activation motifs) (Bit) (CD172 antigen-like family member A) (Inhibitory receptor SHPS-1) (MyD-1 antigen) (Signal-regulatory protein alpha-1) (Sirp-alpha-1) (mSIRP-alpha1) (p84) (CD antigen CD172a)
P97799	Nrsn1	NRSN1_MOUSE	P97799_K154	TB_24H-MOCK_24H	-1.05782	0.00356296	0.0187822	no	-1.05782	0.0187822	Neurensin-1 (Neuro-p24) (Vesicular membrane protein of 24 kDa) (Vesicular membrane protein p24)
P97822	Anp32e	AN32E_MOUSE	P97822_K113	TB_24H-MOCK_24H	-0.297291	0.594795	0.738237	no	-0.297291	0.738237	Acidic leucine-rich nuclear phosphoprotein 32 family member E (Cerebellar postnatal development protein 1) (LANP-like protein) (LANP-L)
P97855	G3bp1	G3BP1_MOUSE	P97855_K76	TB_24H-MOCK_24H	-0.200018	0.766878	0.860391	no	-0.200018	0.860391	Ras GTPase-activating protein-binding protein 1 (G3BP-1) (EC 3.6.4.12) (EC 3.6.4.13) (ATP-dependent DNA helicase VIII) (GAP SH3 domain-binding protein 1) (HDH-VIII)
P98078	Dab2	DAB2_MOUSE	P98078_K321	TB_24H-MOCK_24H	-0.789465	0.232195	0.415808	no	-0.789465	0.415808	Disabled homolog 2 (Adaptor molecule disabled-2) (Differentially expressed in ovarian carcinoma 2) (DOC-2) (Mitogen-responsive phosphoprotein)
P99024	Tubb5	TBB5_MOUSE	P99024_K58	TB_24H-MOCK_24H	1.08188	0.0134619	0.0523992	no	1.08188	0.0523992	Tubulin beta-5 chain
P99027	Rplp2	RLA2_MOUSE	P99027_K21	TB_24H-MOCK_24H	#NUM!		0	yes	4.29861	0.0261791	60S acidic ribosomal protein P2
Q00519	Xdh	XDH_MOUSE	Q00519_K905	TB_24H-MOCK_24H	0.926758	0.0147588	0.05581	no	0.926758	0.05581	Xanthine dehydrogenase/oxidase [Includes: Xanthine dehydrogenase (XD) (EC 1.17.1.4); Xanthine oxidase (XO) (EC 1.17.3.2) (Xanthine oxidoreductase) (XOR)]
Q00519	Xdh	XDH_MOUSE	Q00519_K470	TB_24H-MOCK_24H	1.89615	0.0100806	0.0421217	no	1.89615	0.0421217	Xanthine dehydrogenase/oxidase [Includes: Xanthine dehydrogenase (XD) (EC 1.17.1.4); Xanthine oxidase (XO) (EC 1.17.3.2) (Xanthine oxidoreductase) (XOR)]
Q00519	Xdh	XDH_MOUSE	Q00519_K781	TB_24H-MOCK_24H	#NUM!		0	yes	4.38526	0.0294957	Xanthine dehydrogenase/oxidase [Includes: Xanthine dehydrogenase (XD) (EC 1.17.1.4); Xanthine oxidase (XO) (EC 1.17.3.2) (Xanthine oxidoreductase) (XOR)]
Q00519	Xdh	XDH_MOUSE	Q00519_K893	TB_24H-MOCK_24H	#NUM!		0	yes	3.01978	0.0278835	Xanthine dehydrogenase/oxidase [Includes: Xanthine dehydrogenase (XD) (EC 1.17.1.4); Xanthine oxidase (XO) (EC 1.17.3.2) (Xanthine oxidoreductase) (XOR)]
Q00612	G6pdx	G6PD1_MOUSE	Q00612_K407	TB_24H-MOCK_24H	#NUM!		0	yes	3.259	0.0219194	Glucose-6-phosphate 1-dehydrogenase X (G6PD) (EC 1.1.1.49)
Q01320	Top2a	TOP2A_MOUSE	Q64511_K140,Q01320_K130	TB_24H-MOCK_24H	#NUM!		0	yes	-2.78156	0.0436939	DNA topoisomerase 2-alpha (EC 5.99.1.3) (DNA topoisomerase II, alpha isozyme)
Q01514	Gbp1	GBP1_MOUSE	Q01514_K57,Q9Z0E6_K57,Q8CFB4_K57	TB_24H-MOCK_24H	#NUM!		0	yes	6.34255	0.049682	Guanylate-binding protein 1 (EC 3.6.5.-) (GTP-binding protein 1) (GBP-1) (mGBP-1) (mGBP1) (Guanine nucleotide-binding protein 1) (Interferon-gamma-inducible protein MAG-1) (Interferon-induced guanylate-binding protein 1)
Q01514	Gbp1	GBP1_MOUSE	Q01514_K372,Q9Z0E6_K372	TB_24H-MOCK_24H	3.59898	3.61891e-06	5.72053e-05	no	3.59898	5.72053e-05	Guanylate-binding protein 1 (EC 3.6.5.-) (GTP-binding protein 1) (GBP-1) (mGBP-1) (mGBP1) (Guanine nucleotide-binding protein 1) (Interferon-gamma-inducible protein MAG-1) (Interferon-induced guanylate-binding protein 1)
Q01514	Gbp1	GBP1_MOUSE	Q01514_K51,Q9Z0E6_K51,Q8CFB4_K51	TB_24H-MOCK_24H	#NUM!		0	yes	5.11195	0.0190341	Guanylate-binding protein 1 (EC 3.6.5.-) (GTP-binding protein 1) (GBP-1) (mGBP-1) (mGBP1) (Guanine nucleotide-binding protein 1) (Interferon-gamma-inducible protein MAG-1) (Interferon-induced guanylate-binding protein 1)
Q01514	Gbp1	GBP1_MOUSE	Q01514_K57,Q9Z0E6_K57	TB_24H-MOCK_24H	#NUM!		0	yes	5.62986	0.0462695	Guanylate-binding protein 1 (EC 3.6.5.-) (GTP-binding protein 1) (GBP-1) (mGBP-1) (mGBP1) (Guanine nucleotide-binding protein 1) (Interferon-gamma-inducible protein MAG-1) (Interferon-induced guanylate-binding protein 1)
Q01853	Vcp	TERA_MOUSE	Q01853_K389	TB_24H-MOCK_24H	#NUM!		0	yes	3.39598	0.0290376	Transitional endoplasmic reticulum ATPase (TER ATPase) (EC 3.6.4.6) (15S Mg(2+)-ATPase p97 subunit) (Valosin-containing protein) (VCP)
Q01853	Vcp	TERA_MOUSE	Q01853_K696	TB_24H-MOCK_24H	0.187354	0.19526	0.368835	no	0.187354	0.368835	Transitional endoplasmic reticulum ATPase (TER ATPase) (EC 3.6.4.6) (15S Mg(2+)-ATPase p97 subunit) (Valosin-containing protein) (VCP)
Q01853	Vcp	TERA_MOUSE	Q01853_K60	TB_24H-MOCK_24H	2.09353	2.58955e-06	4.58062e-05	no	2.09353	4.58062e-05	Transitional endoplasmic reticulum ATPase (TER ATPase) (EC 3.6.4.6) (15S Mg(2+)-ATPase p97 subunit) (Valosin-containing protein) (VCP)
Q01853	Vcp	TERA_MOUSE	Q01853_K658	TB_24H-MOCK_24H	0.928823	0.177735	0.347184	no	0.928823	0.347184	Transitional endoplasmic reticulum ATPase (TER ATPase) (EC 3.6.4.6) (15S Mg(2+)-ATPase p97 subunit) (Valosin-containing protein) (VCP)
Q01853	Vcp	TERA_MOUSE	Q01853_K524	TB_24H-MOCK_24H	1.45593	5.12011e-08	1.85255e-06	no	1.45593	1.85255e-06	Transitional endoplasmic reticulum ATPase (TER ATPase) (EC 3.6.4.6) (15S Mg(2+)-ATPase p97 subunit) (Valosin-containing protein) (VCP)
Q01853	Vcp	TERA_MOUSE	Q01853_K8,Q01853_K18	TB_24H-MOCK_24H	-0.205375	0.810068	0.889399	no	-0.205375	0.889399	Transitional endoplasmic reticulum ATPase (TER ATPase) (EC 3.6.4.6) (15S Mg(2+)-ATPase p97 subunit) (Valosin-containing protein) (VCP)
Q01853	Vcp	TERA_MOUSE	Q01853_K109	TB_24H-MOCK_24H	-0.0594238	0.904043	0.941293	no	-0.0594238	0.941293	Transitional endoplasmic reticulum ATPase (TER ATPase) (EC 3.6.4.6) (15S Mg(2+)-ATPase p97 subunit) (Valosin-containing protein) (VCP)
Q01853	Vcp	TERA_MOUSE	Q01853_K20	TB_24H-MOCK_24H	-0.224944	0.61573	0.754613	no	-0.224944	0.754613	Transitional endoplasmic reticulum ATPase (TER ATPase) (EC 3.6.4.6) (15S Mg(2+)-ATPase p97 subunit) (Valosin-containing protein) (VCP)
Q01853	Vcp	TERA_MOUSE	Q01853_K18	TB_24H-MOCK_24H	0.800396	0.473682	0.653467	no	0.800396	0.653467	Transitional endoplasmic reticulum ATPase (TER ATPase) (EC 3.6.4.6) (15S Mg(2+)-ATPase p97 subunit) (Valosin-containing protein) (VCP)
Q01853	Vcp	TERA_MOUSE	Q01853_K251	TB_24H-MOCK_24H	0.741111	0.0558158	0.152155	no	0.741111	0.152155	Transitional endoplasmic reticulum ATPase (TER ATPase) (EC 3.6.4.6) (15S Mg(2+)-ATPase p97 subunit) (Valosin-containing protein) (VCP)
Q01853	Vcp	TERA_MOUSE	Q01853_K336	TB_24H-MOCK_24H	-0.646939	0.262745	0.450843	no	-0.646939	0.450843	Transitional endoplasmic reticulum ATPase (TER ATPase) (EC 3.6.4.6) (15S Mg(2+)-ATPase p97 subunit) (Valosin-containing protein) (VCP)
Q01853	Vcp	TERA_MOUSE	Q01853_K148	TB_24H-MOCK_24H	1.3145	0.00533201	0.025339	no	1.3145	0.025339	Transitional endoplasmic reticulum ATPase (TER ATPase) (EC 3.6.4.6) (15S Mg(2+)-ATPase p97 subunit) (Valosin-containing protein) (VCP)
Q01853	Vcp	TERA_MOUSE	Q01853_K236	TB_24H-MOCK_24H	-0.117707	0.755121	0.853517	no	-0.117707	0.853517	Transitional endoplasmic reticulum ATPase (TER ATPase) (EC 3.6.4.6) (15S Mg(2+)-ATPase p97 subunit) (Valosin-containing protein) (VCP)
Q01853	Vcp	TERA_MOUSE	Q01853_K112	TB_24H-MOCK_24H	1.09255	0.00381868	0.0199299	no	1.09255	0.0199299	Transitional endoplasmic reticulum ATPase (TER ATPase) (EC 3.6.4.6) (15S Mg(2+)-ATPase p97 subunit) (Valosin-containing protein) (VCP)
Q01853	Vcp	TERA_MOUSE	Q01853_K668	TB_24H-MOCK_24H	0.349364	0.500334	0.672747	no	0.349364	0.672747	Transitional endoplasmic reticulum ATPase (TER ATPase) (EC 3.6.4.6) (15S Mg(2+)-ATPase p97 subunit) (Valosin-containing protein) (VCP)
Q01853	Vcp	TERA_MOUSE	Q01853_K386	TB_24H-MOCK_24H	0.0281197	0.951394	0.969046	no	0.0281197	0.969046	Transitional endoplasmic reticulum ATPase (TER ATPase) (EC 3.6.4.6) (15S Mg(2+)-ATPase p97 subunit) (Valosin-containing protein) (VCP)
Q01853	Vcp	TERA_MOUSE	Q01853_K8	TB_24H-MOCK_24H	0.0998572	0.747036	0.84767	no	0.0998572	0.84767	Transitional endoplasmic reticulum ATPase (TER ATPase) (EC 3.6.4.6) (15S Mg(2+)-ATPase p97 subunit) (Valosin-containing protein) (VCP)
Q02053	Uba1	UBA1_MOUSE	Q02053_K528	TB_24H-MOCK_24H	0.282439	0.454951	0.634222	no	0.282439	0.634222	Ubiquitin-like modifier-activating enzyme 1 (EC 6.2.1.45) (Ubiquitin-activating enzyme E1) (Ubiquitin-activating enzyme E1 X) (Ubiquitin-like modifier-activating enzyme 1 X)
Q02053	Uba1	UBA1_MOUSE	Q02053_K185	TB_24H-MOCK_24H	0.689501	0.106086	0.239899	no	0.689501	0.239899	Ubiquitin-like modifier-activating enzyme 1 (EC 6.2.1.45) (Ubiquitin-activating enzyme E1) (Ubiquitin-activating enzyme E1 X) (Ubiquitin-like modifier-activating enzyme 1 X)
Q02053	Uba1	UBA1_MOUSE	Q02053_K746	TB_24H-MOCK_24H	0.00396381	0.995152	0.996404	no	0.00396381	0.996404	Ubiquitin-like modifier-activating enzyme 1 (EC 6.2.1.45) (Ubiquitin-activating enzyme E1) (Ubiquitin-activating enzyme E1 X) (Ubiquitin-like modifier-activating enzyme 1 X)
Q02053	Uba1	UBA1_MOUSE	Q02053_K296	TB_24H-MOCK_24H	0.608796	0.0545757	0.150319	no	0.608796	0.150319	Ubiquitin-like modifier-activating enzyme 1 (EC 6.2.1.45) (Ubiquitin-activating enzyme E1) (Ubiquitin-activating enzyme E1 X) (Ubiquitin-like modifier-activating enzyme 1 X)
Q02053	Uba1	UBA1_MOUSE	Q02053_K8	TB_24H-MOCK_24H	#NUM!		0	yes	3.0057	0.0200608	Ubiquitin-like modifier-activating enzyme 1 (EC 6.2.1.45) (Ubiquitin-activating enzyme E1) (Ubiquitin-activating enzyme E1 X) (Ubiquitin-like modifier-activating enzyme 1 X)
Q02053	Uba1	UBA1_MOUSE	Q02053_K374	TB_24H-MOCK_24H	0.914832	0.0374011	0.113451	no	0.914832	0.113451	Ubiquitin-like modifier-activating enzyme 1 (EC 6.2.1.45) (Ubiquitin-activating enzyme E1) (Ubiquitin-activating enzyme E1 X) (Ubiquitin-like modifier-activating enzyme 1 X)
Q03963	Eif2ak2	E2AK2_MOUSE	Q03963_K154	TB_24H-MOCK_24H	0.551321	0.0355917	0.110023	no	0.551321	0.110023	Interferon-induced, double-stranded RNA-activated protein kinase (EC 2.7.11.1) (Eukaryotic translation initiation factor 2-alpha kinase 2) (eIF-2A protein kinase 2) (Interferon-inducible RNA-dependent protein kinase) (P1/eIF-2A protein kinase) (Protein kinase RNA-activated) (PKR) (Protein kinase R) (Serine/threonine-protein kinase TIK) (Tyrosine-protein kinase EIF2AK2) (EC 2.7.10.2) (p68 kinase)
Q04447	Ckb	KCRB_MOUSE	Q04447_K247	TB_24H-MOCK_24H	0.324245	0.353431	0.539299	no	0.324245	0.539299	Creatine kinase B-type (EC 2.7.3.2) (B-CK) (Creatine kinase B chain)
Q04750	Top1	TOP1_MOUSE	Q04750_K254	TB_24H-MOCK_24H	0.393441	0.630367	0.766649	no	0.393441	0.766649	DNA topoisomerase 1 (EC 5.99.1.2) (DNA topoisomerase I)
Q05921	Rnasel	RN5A_MOUSE	Q05921_K240	TB_24H-MOCK_24H	#NUM!		0	yes	5.13221	0.0129911	2-5A-dependent ribonuclease (2-5A-dependent RNase) (EC 3.1.26.-) (Ribonuclease 4) (Ribonuclease L) (RNase L)
Q07076	Anxa7	ANXA7_MOUSE	Q07076_K199	TB_24H-MOCK_24H	1.06836	0.000790412	0.00535462	no	1.06836	0.00535462	Annexin A7 (Annexin VII) (Annexin-7) (Synexin)
Q07113	Igf2r	MPRI_MOUSE	Q07113_K2342	TB_24H-MOCK_24H	-0.44317	0.699291	0.813735	no	-0.44317	0.813735	Cation-independent mannose-6-phosphate receptor (CI Man-6-P receptor) (CI-MPR) (M6PR) (300 kDa mannose 6-phosphate receptor) (MPR 300) (Insulin-like growth factor 2 receptor) (Insulin-like growth factor II receptor) (IGF-II receptor) (M6P/IGF2 receptor) (M6P/IGF2R) (CD antigen CD222)
Q148V7	Kiaa1468	K1468_MOUSE	Q148V7_K877	TB_24H-MOCK_24H	1.12461	0.157311	0.320254	no	1.12461	0.320254	LisH domain and HEAT repeat-containing protein KIAA1468
Q18PI6	Cd84	SLAF5_MOUSE	Q18PI6_K261	TB_24H-MOCK_24H	0.516998	0.506977	0.673872	no	0.516998	0.673872	SLAM family member 5 (Leukocyte differentiation antigen CD84) (Signaling lymphocytic activation molecule 5) (CD antigen CD84)
Q18PI6	Cd84	SLAF5_MOUSE	Q18PI6_K262	TB_24H-MOCK_24H	0.647913	0.33647	0.523973	no	0.647913	0.523973	SLAM family member 5 (Leukocyte differentiation antigen CD84) (Signaling lymphocytic activation molecule 5) (CD antigen CD84)
Q2EMV9	Parp14	PAR14_MOUSE	Q2EMV9_K976	TB_24H-MOCK_24H	1.52309	2.50193e-05	0.000274695	no	1.52309	0.000274695	Poly [ADP-ribose] polymerase 14 (PARP-14) (EC 2.4.2.30) (ADP-ribosyltransferase diphtheria toxin-like 8) (ARTD8) (Collaborator of STAT6) (CoaSt6)
Q2EMV9	Parp14	PAR14_MOUSE	Q2EMV9_K1508	TB_24H-MOCK_24H	#NUM!		0	yes	4.03838	0.0296113	Poly [ADP-ribose] polymerase 14 (PARP-14) (EC 2.4.2.30) (ADP-ribosyltransferase diphtheria toxin-like 8) (ARTD8) (Collaborator of STAT6) (CoaSt6)
Q2EMV9	Parp14	PAR14_MOUSE	Q2EMV9_K1319	TB_24H-MOCK_24H	#NUM!		0	yes	4.11546	0.0114752	Poly [ADP-ribose] polymerase 14 (PARP-14) (EC 2.4.2.30) (ADP-ribosyltransferase diphtheria toxin-like 8) (ARTD8) (Collaborator of STAT6) (CoaSt6)
Q2EMV9	Parp14	PAR14_MOUSE	Q2EMV9_K1320	TB_24H-MOCK_24H	#NUM!		0	yes	4.60979	0.019378	Poly [ADP-ribose] polymerase 14 (PARP-14) (EC 2.4.2.30) (ADP-ribosyltransferase diphtheria toxin-like 8) (ARTD8) (Collaborator of STAT6) (CoaSt6)
Q2EMV9	Parp14	PAR14_MOUSE	Q2EMV9_K910	TB_24H-MOCK_24H	2.10664	0.000139777	0.00125014	no	2.10664	0.00125014	Poly [ADP-ribose] polymerase 14 (PARP-14) (EC 2.4.2.30) (ADP-ribosyltransferase diphtheria toxin-like 8) (ARTD8) (Collaborator of STAT6) (CoaSt6)
Q2EMV9	Parp14	PAR14_MOUSE	Q2EMV9_K744	TB_24H-MOCK_24H	1.19003	0.0643682	0.167715	no	1.19003	0.167715	Poly [ADP-ribose] polymerase 14 (PARP-14) (EC 2.4.2.30) (ADP-ribosyltransferase diphtheria toxin-like 8) (ARTD8) (Collaborator of STAT6) (CoaSt6)
Q2EMV9	Parp14	PAR14_MOUSE	Q2EMV9_K1010	TB_24H-MOCK_24H	#NUM!		0	yes	5.19504	0.0367433	Poly [ADP-ribose] polymerase 14 (PARP-14) (EC 2.4.2.30) (ADP-ribosyltransferase diphtheria toxin-like 8) (ARTD8) (Collaborator of STAT6) (CoaSt6)
Q2EMV9	Parp14	PAR14_MOUSE	Q2EMV9_K379	TB_24H-MOCK_24H	#NUM!		0	yes	2.84966	0.0321744	Poly [ADP-ribose] polymerase 14 (PARP-14) (EC 2.4.2.30) (ADP-ribosyltransferase diphtheria toxin-like 8) (ARTD8) (Collaborator of STAT6) (CoaSt6)
Q2EMV9	Parp14	PAR14_MOUSE	Q2EMV9_K1720	TB_24H-MOCK_24H	1.62971	0.0603836	0.160485	no	1.62971	0.160485	Poly [ADP-ribose] polymerase 14 (PARP-14) (EC 2.4.2.30) (ADP-ribosyltransferase diphtheria toxin-like 8) (ARTD8) (Collaborator of STAT6) (CoaSt6)
Q2EMV9	Parp14	PAR14_MOUSE	Q2EMV9_K1121	TB_24H-MOCK_24H	0.195559	0.713714	0.823955	no	0.195559	0.823955	Poly [ADP-ribose] polymerase 14 (PARP-14) (EC 2.4.2.30) (ADP-ribosyltransferase diphtheria toxin-like 8) (ARTD8) (Collaborator of STAT6) (CoaSt6)
Q2EMV9	Parp14	PAR14_MOUSE	Q2EMV9_K1014	TB_24H-MOCK_24H	#NUM!		0	yes	3.591	0.0144064	Poly [ADP-ribose] polymerase 14 (PARP-14) (EC 2.4.2.30) (ADP-ribosyltransferase diphtheria toxin-like 8) (ARTD8) (Collaborator of STAT6) (CoaSt6)
Q2NL51	Gsk3a	GSK3A_MOUSE	Q9WV60_K205,Q2NL51_K268	TB_24H-MOCK_24H	2.25955	2.82416e-06	4.7327e-05	no	2.25955	4.7327e-05	Glycogen synthase kinase-3 alpha (GSK-3 alpha) (EC 2.7.11.26) (Serine/threonine-protein kinase GSK3A) (EC 2.7.11.1)
Q3T9E4	Tgtp2	TGTP2_MOUSE	Q62293_K97,Q3T9E4_K97	TB_24H-MOCK_24H	#NUM!		0	yes	7.29794	0.0134219	T-cell-specific guanine nucleotide triphosphate-binding protein 2 (EC 3.6.5.-) (Interferon-gamma-inducible GTPase Ifggb6 protein) (T-cell-specific guanine nucleotide triphosphate-binding protein)
Q3T9E4	Tgtp2	TGTP2_MOUSE	Q62293_K242,Q3T9E4_K242	TB_24H-MOCK_24H	#NUM!		0	yes	7.30764	0.0216606	T-cell-specific guanine nucleotide triphosphate-binding protein 2 (EC 3.6.5.-) (Interferon-gamma-inducible GTPase Ifggb6 protein) (T-cell-specific guanine nucleotide triphosphate-binding protein)
Q3TCH7	Cul4a	CUL4A_MOUSE	Q3TCH7_K416	TB_24H-MOCK_24H	-0.356112	0.621823	0.760909	no	-0.356112	0.760909	Cullin-4A (CUL-4A)
Q3TCH7	Cul4a	CUL4A_MOUSE	Q3TCH7_K465	TB_24H-MOCK_24H	0.965481	0.00328704	0.0177405	no	0.965481	0.0177405	Cullin-4A (CUL-4A)
Q3TCH7	Cul4a	CUL4A_MOUSE	Q3TCH7_K104	TB_24H-MOCK_24H	0.0182207	0.978046	0.986554	no	0.0182207	0.986554	Cullin-4A (CUL-4A)
Q3THK7	Gmps	GUAA_MOUSE	Q3THK7_K182	TB_24H-MOCK_24H	0.547948	0.0526668	0.147416	no	0.547948	0.147416	GMP synthase [glutamine-hydrolyzing] (EC 6.3.5.2) (GMP synthetase) (Glutamine amidotransferase)
Q3TIR1	Trappc13	TPC13_MOUSE	Q3TIR1_K395	TB_24H-MOCK_24H	-1.34429	0.000337401	0.00263305	no	-1.34429	0.00263305	Trafficking protein particle complex subunit 13
Q3TIR1	Trappc13	TPC13_MOUSE	Q3TIR1_K264	TB_24H-MOCK_24H	-1.01401	0.0192056	0.0677945	no	-1.01401	0.0677945	Trafficking protein particle complex subunit 13
Q3TRM8	Hk3	HXK3_MOUSE	Q3TRM8_K184	TB_24H-MOCK_24H	#NUM!		0	yes	4.1544	0.046537	Hexokinase-3 (EC 2.7.1.1) (Hexokinase type III) (HK III)
Q3TW96	Uap1l1	UAP1L_MOUSE	Q3TW96_K136	TB_24H-MOCK_24H	0.844711	0.160233	0.3229	no	0.844711	0.3229	UDP-N-acetylhexosamine pyrophosphorylase-like protein 1 (EC 2.7.7.-)
Q3TXS7	Psmd1	PSMD1_MOUSE	Q3TXS7_K890	TB_24H-MOCK_24H	-0.346054	0.262803	0.450843	no	-0.346054	0.450843	26S proteasome non-ATPase regulatory subunit 1 (26S proteasome regulatory subunit RPN2) (26S proteasome regulatory subunit S1)
Q3TXS7	Psmd1	PSMD1_MOUSE	Q3TXS7_K838	TB_24H-MOCK_24H	-0.248007	0.23998	0.42604	no	-0.248007	0.42604	26S proteasome non-ATPase regulatory subunit 1 (26S proteasome regulatory subunit RPN2) (26S proteasome regulatory subunit S1)
Q3U1J4	Ddb1	DDB1_MOUSE	Q3U1J4_K1121	TB_24H-MOCK_24H	-1.02452	0.100414	0.231198	no	-1.02452	0.231198	DNA damage-binding protein 1 (DDB p127 subunit) (Damage-specific DNA-binding protein 1) (UV-damaged DNA-binding factor)
Q3U2C5	Rnf149	RN149_MOUSE	Q3U2C5_K241	TB_24H-MOCK_24H	0.921306	0.254048	0.441051	no	0.921306	0.441051	E3 ubiquitin-protein ligase RNF149 (EC 6.3.2.-) (Goliath-related E3 ubiquitin-protein ligase 4) (RING finger protein 149)
Q3U2C5	Rnf149	RN149_MOUSE	Q3U2C5_K284	TB_24H-MOCK_24H	0.791975	0.339366	0.526282	no	0.791975	0.526282	E3 ubiquitin-protein ligase RNF149 (EC 6.3.2.-) (Goliath-related E3 ubiquitin-protein ligase 4) (RING finger protein 149)
Q3U2C5	Rnf149	RN149_MOUSE	Q3U2C5_K306	TB_24H-MOCK_24H	1.58526	0.0167174	0.0609017	no	1.58526	0.0609017	E3 ubiquitin-protein ligase RNF149 (EC 6.3.2.-) (Goliath-related E3 ubiquitin-protein ligase 4) (RING finger protein 149)
Q3U5Q7	Cmpk2	CMPK2_MOUSE	Q3U5Q7_K249	TB_24H-MOCK_24H	#NUM!		0	yes	5.05168	0.0172755	UMP-CMP kinase 2, mitochondrial (EC 2.7.4.14) (Nucleoside-diphosphate kinase) (EC 2.7.4.6) (Thymidylate kinase LPS-inducible member) (TYKi)
Q3U5Q7	Cmpk2	CMPK2_MOUSE	Q3U5Q7_K245	TB_24H-MOCK_24H	1.6395	0.150724	0.309073	no	1.6395	0.309073	UMP-CMP kinase 2, mitochondrial (EC 2.7.4.14) (Nucleoside-diphosphate kinase) (EC 2.7.4.6) (Thymidylate kinase LPS-inducible member) (TYKi)
Q3U5Q7	Cmpk2	CMPK2_MOUSE	Q3U5Q7_K251	TB_24H-MOCK_24H	#NUM!		0	yes	3.51309	0.0170675	UMP-CMP kinase 2, mitochondrial (EC 2.7.4.14) (Nucleoside-diphosphate kinase) (EC 2.7.4.6) (Thymidylate kinase LPS-inducible member) (TYKi)
Q3U7R1	Esyt1	ESYT1_MOUSE	Q3U7R1_K672	TB_24H-MOCK_24H	2.16974	0.00996859	0.0418733	no	2.16974	0.0418733	Extended synaptotagmin-1 (E-Syt1) (Membrane-bound C2 domain-containing protein)
Q3U7R1	Esyt1	ESYT1_MOUSE	Q3U7R1_K536	TB_24H-MOCK_24H	2.50416	1.11066e-08	4.53379e-07	no	2.50416	4.53379e-07	Extended synaptotagmin-1 (E-Syt1) (Membrane-bound C2 domain-containing protein)
Q3U7R1	Esyt1	ESYT1_MOUSE	Q3U7R1_K666	TB_24H-MOCK_24H	1.70596	3.91196e-07	1.02096e-05	no	1.70596	1.02096e-05	Extended synaptotagmin-1 (E-Syt1) (Membrane-bound C2 domain-containing protein)
Q3UBG2	Pid1	PCLI1_MOUSE	Q3UBG2_K17	TB_24H-MOCK_24H	-0.499343	0.508097	0.673872	no	-0.499343	0.673872	PTB-containing, cubilin and LRP1-interacting protein (P-CLI1) (Phosphotyrosine interaction domain-containing protein 1)
Q3UBG2	Pid1	PCLI1_MOUSE	Q3UBG2_K19	TB_24H-MOCK_24H	0.582323	0.273276	0.460981	no	0.582323	0.460981	PTB-containing, cubilin and LRP1-interacting protein (P-CLI1) (Phosphotyrosine interaction domain-containing protein 1)
Q3UDK1	Trafd1	TRAD1_MOUSE	Q3UDK1_K484	TB_24H-MOCK_24H	1.74842	0.00546163	0.0257246	no	1.74842	0.0257246	TRAF-type zinc finger domain-containing protein 1 (Protein FLN29)
Q3UDK1	Trafd1	TRAD1_MOUSE	Q3UDK1_K129	TB_24H-MOCK_24H	#NUM!		0	yes	2.84615	0.0205856	TRAF-type zinc finger domain-containing protein 1 (Protein FLN29)
Q3UDR8	Yipf3	YIPF3_MOUSE	Q3UDR8_K99	TB_24H-MOCK_24H	#NUM!		0	yes	5.65196	0.0339366	Protein YIPF3 (Killer lineage protein 1) (YIP1 family member 3) [Cleaved into: Protein YIPF3, N-terminally processed]
Q3UE37	Ube2z	UBE2Z_MOUSE	Q3UE37_K168	TB_24H-MOCK_24H	0.548569	0.0507517	0.143511	no	0.548569	0.143511	Ubiquitin-conjugating enzyme E2 Z (EC 2.3.2.23) (E2 ubiquitin-conjugating enzyme Z) (Uba6-specific E2 conjugating enzyme 1) (Use1) (Ubiquitin carrier protein Z) (Ubiquitin-protein ligase Z)
Q3UE37	Ube2z	UBE2Z_MOUSE	Q3UE37_K262	TB_24H-MOCK_24H	-1.78223	0.0136274	0.0526572	no	-1.78223	0.0526572	Ubiquitin-conjugating enzyme E2 Z (EC 2.3.2.23) (E2 ubiquitin-conjugating enzyme Z) (Uba6-specific E2 conjugating enzyme 1) (Use1) (Ubiquitin carrier protein Z) (Ubiquitin-protein ligase Z)
Q3UIR3	Dtx3l	DTX3L_MOUSE	Q3UIR3_K736	TB_24H-MOCK_24H	0.229476	0.788946	0.871013	no	0.229476	0.871013	E3 ubiquitin-protein ligase DTX3L (EC 6.3.2.-) (Protein deltex-3-like)
Q3UIR3	Dtx3l	DTX3L_MOUSE	Q3UIR3_K460	TB_24H-MOCK_24H	2.13569	3.46571e-05	0.000372798	no	2.13569	0.000372798	E3 ubiquitin-protein ligase DTX3L (EC 6.3.2.-) (Protein deltex-3-like)
Q3UIR3	Dtx3l	DTX3L_MOUSE	Q3UIR3_K340	TB_24H-MOCK_24H	#NUM!		0	yes	6.1626	0.0198097	E3 ubiquitin-protein ligase DTX3L (EC 6.3.2.-) (Protein deltex-3-like)
Q3UJD6	Usp19	UBP19_MOUSE	Q3UJD6_K613	TB_24H-MOCK_24H	1.37806	0.00833264	0.0358652	no	1.37806	0.0358652	Ubiquitin carboxyl-terminal hydrolase 19 (EC 3.4.19.12) (Deubiquitinating enzyme 19) (Ubiquitin thioesterase 19) (Ubiquitin-specific-processing protease 19)
Q3UJD6	Usp19	UBP19_MOUSE	Q3UJD6_K777	TB_24H-MOCK_24H	1.87396	4.07304e-08	1.50797e-06	no	1.87396	1.50797e-06	Ubiquitin carboxyl-terminal hydrolase 19 (EC 3.4.19.12) (Deubiquitinating enzyme 19) (Ubiquitin thioesterase 19) (Ubiquitin-specific-processing protease 19)
Q3UJD6	Usp19	UBP19_MOUSE	Q3UJD6_K695	TB_24H-MOCK_24H	1.68674	0.0021002	0.0121583	no	1.68674	0.0121583	Ubiquitin carboxyl-terminal hydrolase 19 (EC 3.4.19.12) (Deubiquitinating enzyme 19) (Ubiquitin thioesterase 19) (Ubiquitin-specific-processing protease 19)
Q3UND0	Skap2	SKAP2_MOUSE	Q3UND0_K125	TB_24H-MOCK_24H	1.08774	0.0212632	0.0732706	no	1.08774	0.0732706	Src kinase-associated phosphoprotein 2 (Pyk2/RAFTK-associated protein) (SKAP55 homolog) (SKAP-HOM) (Src family-associated phosphoprotein 2) (Src kinase-associated phosphoprotein 55-related protein) (Src-associated adapter protein with PH and SH3 domains)
Q3UPF5	Zc3hav1	ZCCHV_MOUSE	Q3UPF5_K311	TB_24H-MOCK_24H	1.99476	1.42085e-06	2.79259e-05	no	1.99476	2.79259e-05	Zinc finger CCCH-type antiviral protein 1 (ADP-ribosyltransferase diphtheria toxin-like 13) (ARTD13)
Q3UPF5	Zc3hav1	ZCCHV_MOUSE	Q3UPF5_K434	TB_24H-MOCK_24H	#NUM!		0	yes	4.52094	0.0202783	Zinc finger CCCH-type antiviral protein 1 (ADP-ribosyltransferase diphtheria toxin-like 13) (ARTD13)
Q3UPF5	Zc3hav1	ZCCHV_MOUSE	Q3UPF5_K556	TB_24H-MOCK_24H	0.6001	0.155897	0.318599	no	0.6001	0.318599	Zinc finger CCCH-type antiviral protein 1 (ADP-ribosyltransferase diphtheria toxin-like 13) (ARTD13)
Q3UPL0	Sec31a	SC31A_MOUSE	Q3UPL0_K435	TB_24H-MOCK_24H	#NUM!		0	yes	3.61096	0.0442351	Protein transport protein Sec31A (SEC31-like protein 1) (SEC31-related protein A)
Q4FZC9	Syne3	SYNE3_MOUSE	Q4FZC9_K562	TB_24H-MOCK_24H	1.26834	0.519461	0.682749	no	1.26834	0.682749	Nesprin-3 (Nuclear envelope spectrin repeat protein 3)
Q4LDD4	Arap1	ARAP1_MOUSE	Q4LDD4_K588	TB_24H-MOCK_24H	#NUM!		0	yes	6.63426	0.0176487	Arf-GAP with Rho-GAP domain, ANK repeat and PH domain-containing protein 1 (Centaurin-delta-2) (Cnt-d2)
Q4VC33	Maea	MAEA_MOUSE	Q4VC33_K100	TB_24H-MOCK_24H	0.511562	0.289766	0.479032	no	0.511562	0.479032	Macrophage erythroblast attacher (Erythroblast macrophage protein)
Q501J6	Ddx17	DDX17_MOUSE	Q501J6_K195,Q61656_K197	TB_24H-MOCK_24H	1.89823	1.23013e-12	3.26394e-10	no	1.89823	3.26394e-10	Probable ATP-dependent RNA helicase DDX17 (EC 3.6.4.13) (DEAD box protein 17)
Q571I9	Aldh16a1	A16A1_MOUSE	Q571I9_K603	TB_24H-MOCK_24H	-0.128073	0.738473	0.842155	no	-0.128073	0.842155	Aldehyde dehydrogenase family 16 member A1
Q5BKP2	Usp13	UBP13_MOUSE	Q5BKP2_K585	TB_24H-MOCK_24H	0.0170138	0.931573	0.958051	no	0.0170138	0.958051	Ubiquitin carboxyl-terminal hydrolase 13 (EC 3.4.19.12) (Deubiquitinating enzyme 13) (Ubiquitin thioesterase 13) (Ubiquitin-specific-processing protease 13)
Q5BLK4	Zcchc6	TUT7_MOUSE	Q5BLK4_K602	TB_24H-MOCK_24H	2.49079	1.85674e-11	2.51989e-09	no	2.49079	2.51989e-09	Terminal uridylyltransferase 7 (TUTase 7) (EC 2.7.7.52) (Zinc finger CCHC domain-containing protein 6)
Q5BLK4	Zcchc6	TUT7_MOUSE	Q5BLK4_K408	TB_24H-MOCK_24H	2.68918	1.50622e-06	2.88904e-05	no	2.68918	2.88904e-05	Terminal uridylyltransferase 7 (TUTase 7) (EC 2.7.7.52) (Zinc finger CCHC domain-containing protein 6)
Q5FWH6	Arhgef15	ARHGF_MOUSE	Q5FWH6_K594	TB_24H-MOCK_24H	-0.682531	0.574923	0.725259	no	-0.682531	0.725259	Rho guanine nucleotide exchange factor 15 (Ephexin-5) (E5)
Q5NC05	Ttf2	TTF2_MOUSE	Q5NC05_K250	TB_24H-MOCK_24H	0.846459	0.676595	0.796902	no	0.846459	0.796902	Transcription termination factor 2 (EC 3.6.4.-) (RNA polymerase II termination factor) (Transcription release factor 2)
Q5ND34	Wdr81	WDR81_MOUSE	Q5ND34_K1228	TB_24H-MOCK_24H	-1.65488	0.00570773	0.0264148	no	-1.65488	0.0264148	WD repeat-containing protein 81
Q5RJG1	Nol10	NOL10_MOUSE	Q5RJG1_K519	TB_24H-MOCK_24H	-1.09405	0.769596	0.860391	no	-1.09405	0.860391	Nucleolar protein 10
Q5SSH7	Zzef1	ZZEF1_MOUSE	Q5SSH7_K2464	TB_24H-MOCK_24H	0.346592	0.357327	0.54336	no	0.346592	0.54336	Zinc finger ZZ-type and EF-hand domain-containing protein 1
Q5SSH7	Zzef1	ZZEF1_MOUSE	Q5SSH7_K2254	TB_24H-MOCK_24H	0.206698	0.559917	0.714827	no	0.206698	0.714827	Zinc finger ZZ-type and EF-hand domain-containing protein 1
Q5SUA5	Myo1g	MYO1G_MOUSE	Q5SUA5_K199	TB_24H-MOCK_24H	0.775977	0.00385373	0.0199299	no	0.775977	0.0199299	Unconventional myosin-Ig
Q5SUA5	Myo1g	MYO1G_MOUSE	Q5SUA5_K141	TB_24H-MOCK_24H	0.304484	0.454603	0.634222	no	0.304484	0.634222	Unconventional myosin-Ig
Q5SV42	Serpinb1c	ILEUC_MOUSE	Q5SV42_K87,Q9D154_K87	TB_24H-MOCK_24H	0.156047	0.665236	0.787987	no	0.156047	0.787987	Leukocyte elastase inhibitor C (Serine protease inhibitor EIC) (Serpin B1c)
Q5SV42	Serpinb1c	ILEUC_MOUSE	Q5SV42_K314,Q9D154_K317	TB_24H-MOCK_24H	1.20116	0.000500722	0.0036735	no	1.20116	0.0036735	Leukocyte elastase inhibitor C (Serine protease inhibitor EIC) (Serpin B1c)
Q5SW28	Pik3r5	PI3R5_MOUSE	Q5SW28_K422	TB_24H-MOCK_24H	0.279277	0.485806	0.663297	no	0.279277	0.663297	Phosphoinositide 3-kinase regulatory subunit 5 (PI3-kinase regulatory subunit 5) (PI3-kinase p101 subunit) (Phosphatidylinositol 4,5-bisphosphate 3-kinase regulatory subunit) (PtdIns-3-kinase regulatory subunit) (PtdIns-3-kinase p101) (p101-PI3K)
Q5SW28	Pik3r5	PI3R5_MOUSE	Q5SW28_K523	TB_24H-MOCK_24H	#NUM!		0	yes	6.5054	0.035513	Phosphoinositide 3-kinase regulatory subunit 5 (PI3-kinase regulatory subunit 5) (PI3-kinase p101 subunit) (Phosphatidylinositol 4,5-bisphosphate 3-kinase regulatory subunit) (PtdIns-3-kinase regulatory subunit) (PtdIns-3-kinase p101) (p101-PI3K)
Q5SXY1	Specc1	CYTSB_MOUSE	Q5SXY1_K940	TB_24H-MOCK_24H	-0.664774	0.0671236	0.172635	no	-0.664774	0.172635	Cytospin-B (Sperm antigen with calponin homology and coiled-coil domains 1)
Q5XJY5	Arcn1	COPD_MOUSE	Q5XJY5_K14	TB_24H-MOCK_24H	-0.356237	0.318266	0.507187	no	-0.356237	0.507187	Coatomer subunit delta (Archain) (Delta-coat protein) (Delta-COP)
Q5XJY5	Arcn1	COPD_MOUSE	Q5XJY5_K11	TB_24H-MOCK_24H	-0.355434	0.27134	0.459545	no	-0.355434	0.459545	Coatomer subunit delta (Archain) (Delta-coat protein) (Delta-COP)
Q5Y5T1	Zdhhc20	ZDH20_MOUSE	Q5Y5T1_K346	TB_24H-MOCK_24H	-0.305689	0.300487	0.487664	no	-0.305689	0.487664	Probable palmitoyltransferase ZDHHC20 (EC 2.3.1.225) (Zinc finger DHHC domain-containing protein 20) (DHHC-20)
Q60695	Rgl1	RGL1_MOUSE	Q60695_K40	TB_24H-MOCK_24H	#NUM!		0	yes	4.37118	0.0274554	Ral guanine nucleotide dissociation stimulator-like 1 (RalGDS-like 1)
Q60710	Samhd1	SAMH1_MOUSE	Q60710_K467	TB_24H-MOCK_24H	3.84113	1.18994e-12	3.26394e-10	no	3.84113	3.26394e-10	Deoxynucleoside triphosphate triphosphohydrolase SAMHD1 (dNTPase) (EC 3.1.5.-) (Interferon-gamma-inducible protein Mg11) (SAM domain and HD domain-containing protein 1)
Q60710	Samhd1	SAMH1_MOUSE	Q60710_K11	TB_24H-MOCK_24H	-0.43095	0.587899	0.732917	no	-0.43095	0.732917	Deoxynucleoside triphosphate triphosphohydrolase SAMHD1 (dNTPase) (EC 3.1.5.-) (Interferon-gamma-inducible protein Mg11) (SAM domain and HD domain-containing protein 1)
Q60710	Samhd1	SAMH1_MOUSE	Q60710_K620	TB_24H-MOCK_24H	1.03004	0.0267753	0.0875282	no	1.03004	0.0875282	Deoxynucleoside triphosphate triphosphohydrolase SAMHD1 (dNTPase) (EC 3.1.5.-) (Interferon-gamma-inducible protein Mg11) (SAM domain and HD domain-containing protein 1)
Q60710	Samhd1	SAMH1_MOUSE	Q60710_K305	TB_24H-MOCK_24H	2.51975	8.25612e-10	4.86805e-08	no	2.51975	4.86805e-08	Deoxynucleoside triphosphate triphosphohydrolase SAMHD1 (dNTPase) (EC 3.1.5.-) (Interferon-gamma-inducible protein Mg11) (SAM domain and HD domain-containing protein 1)
Q60766	Irgm1	IRGM1_MOUSE	Q60766_K280	TB_24H-MOCK_24H	#NUM!		0	yes	3.06184	0.0427213	Immunity-related GTPase family M protein 1 (EC 3.6.5.-) (Interferon-inducible GTPase 3) (Interferon-inducible protein 1) (LPS-stimulated RAW 264.7 macrophage protein 47) (LRG-47)
Q60769	Tnfaip3	TNAP3_MOUSE	Q60769_K82	TB_24H-MOCK_24H	#NUM!		0	yes	4.81036	0.0433483	Tumor necrosis factor alpha-induced protein 3 (TNF alpha-induced protein 3) (EC 3.4.19.12) (EC 6.3.2.-) (Putative DNA-binding protein A20) (Zinc finger protein A20)
Q60769	Tnfaip3	TNAP3_MOUSE	Q60769_K131	TB_24H-MOCK_24H	#NUM!		0	yes	4.23739	0.0225289	Tumor necrosis factor alpha-induced protein 3 (TNF alpha-induced protein 3) (EC 3.4.19.12) (EC 6.3.2.-) (Putative DNA-binding protein A20) (Zinc finger protein A20)
Q60769	Tnfaip3	TNAP3_MOUSE	Q60769_K628	TB_24H-MOCK_24H	#NUM!		0	yes	4.91067	0.0207126	Tumor necrosis factor alpha-induced protein 3 (TNF alpha-induced protein 3) (EC 3.4.19.12) (EC 6.3.2.-) (Putative DNA-binding protein A20) (Zinc finger protein A20)
Q60769	Tnfaip3	TNAP3_MOUSE	Q60769_K66	TB_24H-MOCK_24H	#NUM!		0	yes	2.9026	0.0392102	Tumor necrosis factor alpha-induced protein 3 (TNF alpha-induced protein 3) (EC 3.4.19.12) (EC 6.3.2.-) (Putative DNA-binding protein A20) (Zinc finger protein A20)
Q60769	Tnfaip3	TNAP3_MOUSE	Q60769_K707	TB_24H-MOCK_24H	#NUM!		0	yes	4.71812	0.0151795	Tumor necrosis factor alpha-induced protein 3 (TNF alpha-induced protein 3) (EC 3.4.19.12) (EC 6.3.2.-) (Putative DNA-binding protein A20) (Zinc finger protein A20)
Q60770	Stxbp3	STXB3_MOUSE	Q60770_K76	TB_24H-MOCK_24H	#NUM!		0	yes	4.97723	0.0140538	Syntaxin-binding protein 3 (MUNC-18-3) (Mammalian homolog of Unc-18c) (Munc-18c) (Protein unc-18 homolog 3) (Unc18-3) (Protein unc-18 homolog C) (Unc-18C)
Q60770	Stxbp3	STXB3_MOUSE	Q60770_K197	TB_24H-MOCK_24H	1.87989	6.94347e-06	9.69649e-05	no	1.87989	9.69649e-05	Syntaxin-binding protein 3 (MUNC-18-3) (Mammalian homolog of Unc-18c) (Munc-18c) (Protein unc-18 homolog 3) (Unc18-3) (Protein unc-18 homolog C) (Unc-18C)
Q60854	Serpinb6	SPB6_MOUSE	Q60854_K316	TB_24H-MOCK_24H	0.439843	0.339882	0.526354	no	0.439843	0.526354	Serpin B6 (Placental thrombin inhibitor) (Proteinase inhibitor 6) (PI-6)
Q60854	Serpinb6	SPB6_MOUSE	Q60854_K204	TB_24H-MOCK_24H	0.168819	0.75645	0.854091	no	0.168819	0.854091	Serpin B6 (Placental thrombin inhibitor) (Proteinase inhibitor 6) (PI-6)
Q60854	Serpinb6	SPB6_MOUSE	Q60854_K209	TB_24H-MOCK_24H	#NUM!		0	yes	3.96311	0.017989	Serpin B6 (Placental thrombin inhibitor) (Proteinase inhibitor 6) (PI-6)
Q60855	Ripk1	RIPK1_MOUSE	Q60855_K429	TB_24H-MOCK_24H	-0.249807	0.641179	0.773887	no	-0.249807	0.773887	Receptor-interacting serine/threonine-protein kinase 1 (EC 2.7.11.1) (Cell death protein RIP) (Receptor-interacting protein 1) (RIP-1) (Serine/threonine-protein kinase RIP)
Q60855	Ripk1	RIPK1_MOUSE	Q60855_K115	TB_24H-MOCK_24H	1.22825	2.53539e-05	0.000276462	no	1.22825	0.000276462	Receptor-interacting serine/threonine-protein kinase 1 (EC 2.7.11.1) (Cell death protein RIP) (Receptor-interacting protein 1) (RIP-1) (Serine/threonine-protein kinase RIP)
Q60930	Vdac2	VDAC2_MOUSE	Q60930_K122	TB_24H-MOCK_24H	#NUM!		0	yes	5.76907	0.0235746	Voltage-dependent anion-selective channel protein 2 (VDAC-2) (mVDAC2) (Outer mitochondrial membrane protein porin 2) (Voltage-dependent anion-selective channel protein 6) (VDAC-6) (mVDAC6)
Q60930	Vdac2	VDAC2_MOUSE	Q60930_K286	TB_24H-MOCK_24H	#NUM!		0	yes	2.96776	0.0267466	Voltage-dependent anion-selective channel protein 2 (VDAC-2) (mVDAC2) (Outer mitochondrial membrane protein porin 2) (Voltage-dependent anion-selective channel protein 6) (VDAC-6) (mVDAC6)
Q60931	Vdac3	VDAC3_MOUSE	Q60931_K163	TB_24H-MOCK_24H	1.43048	0.0113826	0.0465839	no	1.43048	0.0465839	Voltage-dependent anion-selective channel protein 3 (VDAC-3) (mVDAC3) (Outer mitochondrial membrane protein porin 3)
Q60932	Vdac1	VDAC1_MOUSE	Q60932_K122	TB_24H-MOCK_24H	1.6015	0.198598	0.373901	no	1.6015	0.373901	Voltage-dependent anion-selective channel protein 1 (VDAC-1) (mVDAC1) (Outer mitochondrial membrane protein porin 1) (Plasmalemmal porin) (Voltage-dependent anion-selective channel protein 5) (VDAC-5) (mVDAC5)
Q60932	Vdac1	VDAC1_MOUSE	Q60932_K66	TB_24H-MOCK_24H	0.46949	0.574476	0.725259	no	0.46949	0.725259	Voltage-dependent anion-selective channel protein 1 (VDAC-1) (mVDAC1) (Outer mitochondrial membrane protein porin 1) (Plasmalemmal porin) (Voltage-dependent anion-selective channel protein 5) (VDAC-5) (mVDAC5)
Q60932	Vdac1	VDAC1_MOUSE	Q60932_K287	TB_24H-MOCK_24H	-0.030256	0.954126	0.969967	no	-0.030256	0.969967	Voltage-dependent anion-selective channel protein 1 (VDAC-1) (mVDAC1) (Outer mitochondrial membrane protein porin 1) (Plasmalemmal porin) (Voltage-dependent anion-selective channel protein 5) (VDAC-5) (mVDAC5)
Q60932	Vdac1	VDAC1_MOUSE	Q60932_K123	TB_24H-MOCK_24H	0.523542	0.547364	0.705019	no	0.523542	0.705019	Voltage-dependent anion-selective channel protein 1 (VDAC-1) (mVDAC1) (Outer mitochondrial membrane protein porin 1) (Plasmalemmal porin) (Voltage-dependent anion-selective channel protein 5) (VDAC-5) (mVDAC5)
Q60932	Vdac1	VDAC1_MOUSE	Q60932_K33	TB_24H-MOCK_24H	1.66421	0.000135295	0.00122729	no	1.66421	0.00122729	Voltage-dependent anion-selective channel protein 1 (VDAC-1) (mVDAC1) (Outer mitochondrial membrane protein porin 1) (Plasmalemmal porin) (Voltage-dependent anion-selective channel protein 5) (VDAC-5) (mVDAC5)
Q60932	Vdac1	VDAC1_MOUSE	Q60932_K279	TB_24H-MOCK_24H	0.805435	0.418683	0.602117	no	0.805435	0.602117	Voltage-dependent anion-selective channel protein 1 (VDAC-1) (mVDAC1) (Outer mitochondrial membrane protein porin 1) (Plasmalemmal porin) (Voltage-dependent anion-selective channel protein 5) (VDAC-5) (mVDAC5)
Q60961	Laptm4a	LAP4A_MOUSE	Q60961_K7	TB_24H-MOCK_24H	0.0666341	0.882016	0.931147	no	0.0666341	0.931147	Lysosomal-associated transmembrane protein 4A (Golgi 4-transmembrane-spanning transporter) (Mouse transporter protein) (MTP)
Q61029	Tmpo	LAP2B_MOUSE	Q61029_K400	TB_24H-MOCK_24H	-0.888579	0.0128536	0.050903	no	-0.888579	0.050903	Lamina-associated polypeptide 2, isoforms beta/delta/epsilon/gamma (Thymopoietin isoforms beta/delta/epsilon/gamma) (TP beta/delta/epsilon/gamma)
Q61029	Tmpo	LAP2B_MOUSE	Q61029_K388	TB_24H-MOCK_24H	-2.24504	1.21601e-07	3.51979e-06	no	-2.24504	3.51979e-06	Lamina-associated polypeptide 2, isoforms beta/delta/epsilon/gamma (Thymopoietin isoforms beta/delta/epsilon/gamma) (TP beta/delta/epsilon/gamma)
Q61029	Tmpo	LAP2B_MOUSE	Q61029_K212	TB_24H-MOCK_24H	-1.46856	3.92464e-06	6.10797e-05	no	-1.46856	6.10797e-05	Lamina-associated polypeptide 2, isoforms beta/delta/epsilon/gamma (Thymopoietin isoforms beta/delta/epsilon/gamma) (TP beta/delta/epsilon/gamma)
Q61029	Tmpo	LAP2B_MOUSE	Q61029_K392	TB_24H-MOCK_24H	-0.977984	0.017478	0.0630501	no	-0.977984	0.0630501	Lamina-associated polypeptide 2, isoforms beta/delta/epsilon/gamma (Thymopoietin isoforms beta/delta/epsilon/gamma) (TP beta/delta/epsilon/gamma)
Q61029	Tmpo	LAP2B_MOUSE	Q61029_K333	TB_24H-MOCK_24H	-3.03252	0.00194175	0.0114917	no	-3.03252	0.0114917	Lamina-associated polypeptide 2, isoforms beta/delta/epsilon/gamma (Thymopoietin isoforms beta/delta/epsilon/gamma) (TP beta/delta/epsilon/gamma)
Q61093	Cybb	CY24B_MOUSE	Q61093_K299	TB_24H-MOCK_24H	-0.763538	0.0460069	0.132686	no	-0.763538	0.132686	Cytochrome b-245 heavy chain (EC 1.-.-.-) (CGD91-phox) (Cytochrome b(558) subunit beta) (Cytochrome b558 subunit beta) (Heme-binding membrane glycoprotein gp91phox) (Neutrophil cytochrome b 91 kDa polypeptide) (gp91-1) (gp91-phox) (p22 phagocyte B-cytochrome)
Q61093	Cybb	CY24B_MOUSE	Q61093_K306	TB_24H-MOCK_24H	1.04053	0.120055	0.260391	no	1.04053	0.260391	Cytochrome b-245 heavy chain (EC 1.-.-.-) (CGD91-phox) (Cytochrome b(558) subunit beta) (Cytochrome b558 subunit beta) (Heme-binding membrane glycoprotein gp91phox) (Neutrophil cytochrome b 91 kDa polypeptide) (gp91-1) (gp91-phox) (p22 phagocyte B-cytochrome)
Q61093	Cybb	CY24B_MOUSE	Q61093_K567	TB_24H-MOCK_24H	1.0334	0.0659933	0.170278	no	1.0334	0.170278	Cytochrome b-245 heavy chain (EC 1.-.-.-) (CGD91-phox) (Cytochrome b(558) subunit beta) (Cytochrome b558 subunit beta) (Heme-binding membrane glycoprotein gp91phox) (Neutrophil cytochrome b 91 kDa polypeptide) (gp91-1) (gp91-phox) (p22 phagocyte B-cytochrome)
Q61233	Lcp1	PLSL_MOUSE	Q61233_K545	TB_24H-MOCK_24H	0.0745499	0.917759	0.950889	no	0.0745499	0.950889	Plastin-2 (65 kDa macrophage protein) (L-plastin) (Lymphocyte cytosolic protein 1) (LCP-1) (pp65)
Q61233	Lcp1	PLSL_MOUSE	Q61233_K534	TB_24H-MOCK_24H	1.5013	0.00476779	0.0234269	no	1.5013	0.0234269	Plastin-2 (65 kDa macrophage protein) (L-plastin) (Lymphocyte cytosolic protein 1) (LCP-1) (pp65)
Q61233	Lcp1	PLSL_MOUSE	Q61233_K468	TB_24H-MOCK_24H	-0.102509	0.693863	0.811631	no	-0.102509	0.811631	Plastin-2 (65 kDa macrophage protein) (L-plastin) (Lymphocyte cytosolic protein 1) (LCP-1) (pp65)
Q61233	Lcp1	PLSL_MOUSE	Q61233_K82	TB_24H-MOCK_24H	0.466329	0.139094	0.293278	no	0.466329	0.293278	Plastin-2 (65 kDa macrophage protein) (L-plastin) (Lymphocyte cytosolic protein 1) (LCP-1) (pp65)
Q61233	Lcp1	PLSL_MOUSE	Q61233_K88	TB_24H-MOCK_24H	0.834258	0.0206094	0.0716378	no	0.834258	0.0716378	Plastin-2 (65 kDa macrophage protein) (L-plastin) (Lymphocyte cytosolic protein 1) (LCP-1) (pp65)
Q61233	Lcp1	PLSL_MOUSE	Q61233_K456	TB_24H-MOCK_24H	0.54901	0.315999	0.505091	no	0.54901	0.505091	Plastin-2 (65 kDa macrophage protein) (L-plastin) (Lymphocyte cytosolic protein 1) (LCP-1) (pp65)
Q61233	Lcp1	PLSL_MOUSE	Q61233_K472	TB_24H-MOCK_24H	0.116793	0.902714	0.94114	no	0.116793	0.94114	Plastin-2 (65 kDa macrophage protein) (L-plastin) (Lymphocyte cytosolic protein 1) (LCP-1) (pp65)
Q61233	Lcp1	PLSL_MOUSE	Q61233_K294	TB_24H-MOCK_24H	1.0822	0.0246798	0.0821973	no	1.0822	0.0821973	Plastin-2 (65 kDa macrophage protein) (L-plastin) (Lymphocyte cytosolic protein 1) (LCP-1) (pp65)
Q61316	Hspa4	HSP74_MOUSE	Q61316_K221	TB_24H-MOCK_24H	1.31858	0.000761186	0.0052009	no	1.31858	0.0052009	Heat shock 70 kDa protein 4 (Heat shock 70-related protein APG-2)
Q61316	Hspa4	HSP74_MOUSE	Q61316_K351	TB_24H-MOCK_24H	0.765896	0.00517237	0.0248774	no	0.765896	0.0248774	Heat shock 70 kDa protein 4 (Heat shock 70-related protein APG-2)
Q61316	Hspa4	HSP74_MOUSE	Q61316_K687	TB_24H-MOCK_24H	0.645574	0.0562954	0.152419	no	0.645574	0.152419	Heat shock 70 kDa protein 4 (Heat shock 70-related protein APG-2)
Q61316	Hspa4	HSP74_MOUSE	Q61316_K61	TB_24H-MOCK_24H	0.884029	0.0879556	0.209305	no	0.884029	0.209305	Heat shock 70 kDa protein 4 (Heat shock 70-related protein APG-2)
Q61316	Hspa4	HSP74_MOUSE	Q61316_K53	TB_24H-MOCK_24H	1.04131	1.28817e-06	2.59591e-05	no	1.04131	2.59591e-05	Heat shock 70 kDa protein 4 (Heat shock 70-related protein APG-2)
Q61316	Hspa4	HSP74_MOUSE	Q61316_K353	TB_24H-MOCK_24H	0.853115	0.173288	0.342276	no	0.853115	0.342276	Heat shock 70 kDa protein 4 (Heat shock 70-related protein APG-2)
Q61316	Hspa4	HSP74_MOUSE	Q61316_K479	TB_24H-MOCK_24H	-0.0202704	0.948266	0.967415	no	-0.0202704	0.967415	Heat shock 70 kDa protein 4 (Heat shock 70-related protein APG-2)
Q61418	Clcn4	CLCN4_MOUSE	Q61418_K646	TB_24H-MOCK_24H	-0.348051	0.154146	0.315426	no	-0.348051	0.315426	H(+)/Cl(-) exchange transporter 4 (Chloride channel protein 4) (ClC-4) (Chloride transporter ClC-4)
Q61510	Trim25	TRI25_MOUSE	Q61510_K200	TB_24H-MOCK_24H	#NUM!		0	yes	3.21532	0.0253779	E3 ubiquitin/ISG15 ligase TRIM25 (EC 6.3.2.n3) (Estrogen-responsive finger protein) (RING-type E3 ubiquitin transferase) (EC 2.3.2.27) (Tripartite motif-containing protein 25) (Ubiquitin/ISG15-conjugating enzyme TRIM25) (Zinc finger protein 147)
Q61510	Trim25	TRI25_MOUSE	Q61510_K444	TB_24H-MOCK_24H	1.55	0.00383387	0.0199299	no	1.55	0.0199299	E3 ubiquitin/ISG15 ligase TRIM25 (EC 6.3.2.n3) (Estrogen-responsive finger protein) (RING-type E3 ubiquitin transferase) (EC 2.3.2.27) (Tripartite motif-containing protein 25) (Ubiquitin/ISG15-conjugating enzyme TRIM25) (Zinc finger protein 147)
Q61542	Stard3	STAR3_MOUSE	Q61542_K3	TB_24H-MOCK_24H	1.05289	0.0166522	0.0609017	no	1.05289	0.0609017	StAR-related lipid transfer protein 3 (Protein ES 64) (Protein MLN 64) (START domain-containing protein 3) (StARD3)
Q61549	Adgre1	AGRE1_MOUSE	Q61549_K929	TB_24H-MOCK_24H	0.378257	0.38312	0.570559	no	0.378257	0.570559	Adhesion G protein-coupled receptor E1 (Cell surface glycoprotein F4/80) (EGF-like module receptor 1) (EGF-like module-containing mucin-like hormone receptor-like 1) (EMR1 hormone receptor)
Q61598	Gdi2	GDIB_MOUSE	Q61598_K422	TB_24H-MOCK_24H	-0.232099	0.659994	0.786021	no	-0.232099	0.786021	Rab GDP dissociation inhibitor beta (Rab GDI beta) (GDI-3) (Guanosine diphosphate dissociation inhibitor 2) (GDI-2)
Q61598	Gdi2	GDIB_MOUSE	Q61598_K269	TB_24H-MOCK_24H	-0.62079	0.216532	0.394955	no	-0.62079	0.394955	Rab GDP dissociation inhibitor beta (Rab GDI beta) (GDI-3) (Guanosine diphosphate dissociation inhibitor 2) (GDI-2)
Q61598	Gdi2	GDIB_MOUSE	Q61598_K115	TB_24H-MOCK_24H	0.202774	0.43762	0.620103	no	0.202774	0.620103	Rab GDP dissociation inhibitor beta (Rab GDI beta) (GDI-3) (Guanosine diphosphate dissociation inhibitor 2) (GDI-2)
Q61656	Ddx5	DDX5_MOUSE	Q61656_K437	TB_24H-MOCK_24H	-0.00474548	0.992674	0.994548	no	-0.00474548	0.994548	Probable ATP-dependent RNA helicase DDX5 (EC 3.6.4.13) (DEAD box RNA helicase DEAD1) (mDEAD1) (DEAD box protein 5) (RNA helicase p68)
Q61656	Ddx5	DDX5_MOUSE	Q61656_K40	TB_24H-MOCK_24H	-0.972481	0.0907712	0.213796	no	-0.972481	0.213796	Probable ATP-dependent RNA helicase DDX5 (EC 3.6.4.13) (DEAD box RNA helicase DEAD1) (mDEAD1) (DEAD box protein 5) (RNA helicase p68)
Q61699	Hsph1	HS105_MOUSE	Q61699_K351	TB_24H-MOCK_24H	0.355661	0.0652729	0.168972	no	0.355661	0.168972	Heat shock protein 105 kDa (42 degrees C-HSP) (Heat shock 110 kDa protein) (Heat shock-related 100 kDa protein E7I) (HSP-E7I)
Q61753	Phgdh	SERA_MOUSE	Q61753_K289	TB_24H-MOCK_24H	-0.128306	0.68009	0.799698	no	-0.128306	0.799698	D-3-phosphoglycerate dehydrogenase (3-PGDH) (EC 1.1.1.95) (A10)
Q61768	Kif5b	KINH_MOUSE	Q61768_K10	TB_24H-MOCK_24H	0.407222	0.377166	0.563801	no	0.407222	0.563801	Kinesin-1 heavy chain (Conventional kinesin heavy chain) (Ubiquitous kinesin heavy chain) (UKHC)
Q61768	Kif5b	KINH_MOUSE	Q61768_K213	TB_24H-MOCK_24H	1.46592	1.52389e-05	0.000188064	no	1.46592	0.000188064	Kinesin-1 heavy chain (Conventional kinesin heavy chain) (Ubiquitous kinesin heavy chain) (UKHC)
Q61768	Kif5b	KINH_MOUSE	Q61768_K313	TB_24H-MOCK_24H	#NUM!		0	yes	5.67507	0.0369988	Kinesin-1 heavy chain (Conventional kinesin heavy chain) (Ubiquitous kinesin heavy chain) (UKHC)
Q61830	Mrc1	MRC1_MOUSE	Q61830_K326	TB_24H-MOCK_24H	0.320608	0.698831	0.813735	no	0.320608	0.813735	Macrophage mannose receptor 1 (MMR) (CD antigen CD206)
Q61879	Myh10	MYH10_MOUSE	Q8VDD5_K403,Q61879_K410,Q6URW6_K433	TB_24H-MOCK_24H	0.752294	0.0175051	0.0630501	no	0.752294	0.0630501	Myosin-10 (Cellular myosin heavy chain, type B) (Myosin heavy chain 10) (Myosin heavy chain, non-muscle IIb) (Non-muscle myosin heavy chain B) (NMMHC-B) (Non-muscle myosin heavy chain IIb) (NMMHC II-b) (NMMHC-IIB)
Q61879	Myh10	MYH10_MOUSE	Q8VDD5_K186,Q61879_K190	TB_24H-MOCK_24H	0.42723	0.710651	0.821609	no	0.42723	0.821609	Myosin-10 (Cellular myosin heavy chain, type B) (Myosin heavy chain 10) (Myosin heavy chain, non-muscle IIb) (Non-muscle myosin heavy chain B) (NMMHC-B) (Non-muscle myosin heavy chain IIb) (NMMHC II-b) (NMMHC-IIB)
Q61937	Npm1	NPM_MOUSE	Q61937_K271	TB_24H-MOCK_24H	-0.51913	0.301842	0.489341	no	-0.51913	0.489341	Nucleophosmin (NPM) (Nucleolar phosphoprotein B23) (Nucleolar protein NO38) (Numatrin)
Q61990	Pcbp2	PCBP2_MOUSE	Q61990_K119	TB_24H-MOCK_24H	0.0904209	0.746351	0.847497	no	0.0904209	0.847497	Poly(rC)-binding protein 2 (Alpha-CP2) (CTBP) (CBP) (Putative heterogeneous nuclear ribonucleoprotein X) (hnRNP X)
Q61990	Pcbp2	PCBP2_MOUSE	Q61990_K115	TB_24H-MOCK_24H	-0.158927	0.393821	0.579343	no	-0.158927	0.579343	Poly(rC)-binding protein 2 (Alpha-CP2) (CTBP) (CBP) (Putative heterogeneous nuclear ribonucleoprotein X) (hnRNP X)
Q62036	Cep131	CP131_MOUSE	Q62036_K932	TB_24H-MOCK_24H	#NUM!		0	yes	-5.10356	0.049065	Centrosomal protein of 131 kDa (5-azacytidine-induced protein 1) (Pre-acrosome localization protein 1)
Q62036	Cep131	CP131_MOUSE	Q62036_K294	TB_24H-MOCK_24H	#NUM!		0	yes	-3.27103	0.0177239	Centrosomal protein of 131 kDa (5-azacytidine-induced protein 1) (Pre-acrosome localization protein 1)
Q62036	Cep131	CP131_MOUSE	Q62036_K212	TB_24H-MOCK_24H	#NUM!		0	yes	-3.21725	0.0312405	Centrosomal protein of 131 kDa (5-azacytidine-induced protein 1) (Pre-acrosome localization protein 1)
Q62159	Rhoc	RHOC_MOUSE	Q9QUI0_K119,Q62159_K119	TB_24H-MOCK_24H	-0.0853854	0.854604	0.916182	no	-0.0853854	0.916182	Rho-related GTP-binding protein RhoC (Silica-induced gene 61 protein) (SIG-61)
Q62159	Rhoc	RHOC_MOUSE	Q9QUI0_K118,Q62159_K118	TB_24H-MOCK_24H	0.821165	0.0592785	0.157812	no	0.821165	0.157812	Rho-related GTP-binding protein RhoC (Silica-induced gene 61 protein) (SIG-61)
Q62465	Vat1	VAT1_MOUSE	Q62465_K368	TB_24H-MOCK_24H	0.0774825	0.865718	0.922505	no	0.0774825	0.922505	Synaptic vesicle membrane protein VAT-1 homolog (EC 1.-.-.-)
Q62465	Vat1	VAT1_MOUSE	Q62465_K308	TB_24H-MOCK_24H	0.26225	0.70438	0.816138	no	0.26225	0.816138	Synaptic vesicle membrane protein VAT-1 homolog (EC 1.-.-.-)
Q62465	Vat1	VAT1_MOUSE	Q62465_K76	TB_24H-MOCK_24H	0.0351132	0.927056	0.954899	no	0.0351132	0.954899	Synaptic vesicle membrane protein VAT-1 homolog (EC 1.-.-.-)
Q63932	Map2k2	MP2K2_MOUSE	Q63932_K88	TB_24H-MOCK_24H	1.2061	0.00341832	0.0182488	no	1.2061	0.0182488	Dual specificity mitogen-activated protein kinase kinase 2 (MAP kinase kinase 2) (MAPKK 2) (EC 2.7.12.2) (ERK activator kinase 2) (MAPK/ERK kinase 2) (MEK 2)
Q64012	Raly	RALY_MOUSE	Q64012_K179	TB_24H-MOCK_24H	-1.54096	0.000468598	0.00346981	no	-1.54096	0.00346981	RNA-binding protein Raly (Maternally-expressed hnRNP C-related protein) (hnRNP associated with lethal yellow protein)
Q64012	Raly	RALY_MOUSE	Q64012_K13	TB_24H-MOCK_24H	-0.447895	0.0706353	0.178001	no	-0.447895	0.178001	RNA-binding protein Raly (Maternally-expressed hnRNP C-related protein) (hnRNP associated with lethal yellow protein)
Q64112	Ifit2	IFIT2_MOUSE	Q64112_K125	TB_24H-MOCK_24H	#NUM!		0	yes	3.71237	0.0432278	Interferon-induced protein with tetratricopeptide repeats 2 (IFIT-2) (Glucocorticoid-attenuated response gene 39 protein) (GARG-39) (Interferon-induced 54 kDa protein) (IFI-54K) (P54)
Q64112	Ifit2	IFIT2_MOUSE	Q64112_K256	TB_24H-MOCK_24H	#NUM!		0	yes	5.47252	0.0378194	Interferon-induced protein with tetratricopeptide repeats 2 (IFIT-2) (Glucocorticoid-attenuated response gene 39 protein) (GARG-39) (Interferon-induced 54 kDa protein) (IFI-54K) (P54)
Q64112	Ifit2	IFIT2_MOUSE	Q64112_K121	TB_24H-MOCK_24H	#NUM!		0	yes	5.63477	0.0416352	Interferon-induced protein with tetratricopeptide repeats 2 (IFIT-2) (Glucocorticoid-attenuated response gene 39 protein) (GARG-39) (Interferon-induced 54 kDa protein) (IFI-54K) (P54)
Q64112	Ifit2	IFIT2_MOUSE	Q64112_K119	TB_24H-MOCK_24H	#NUM!		0	yes	3.73644	0.0225832	Interferon-induced protein with tetratricopeptide repeats 2 (IFIT-2) (Glucocorticoid-attenuated response gene 39 protein) (GARG-39) (Interferon-induced 54 kDa protein) (IFI-54K) (P54)
Q64112	Ifit2	IFIT2_MOUSE	Q64112_K61	TB_24H-MOCK_24H	4.21042	3.20008e-11	3.63895e-09	no	4.21042	3.63895e-09	Interferon-induced protein with tetratricopeptide repeats 2 (IFIT-2) (Glucocorticoid-attenuated response gene 39 protein) (GARG-39) (Interferon-induced 54 kDa protein) (IFI-54K) (P54)
Q64112	Ifit2	IFIT2_MOUSE	Q64112_K151	TB_24H-MOCK_24H	4.84857	7.58635e-11	6.70971e-09	no	4.84857	6.70971e-09	Interferon-induced protein with tetratricopeptide repeats 2 (IFIT-2) (Glucocorticoid-attenuated response gene 39 protein) (GARG-39) (Interferon-induced 54 kDa protein) (IFI-54K) (P54)
Q64282	Ifit1	IFIT1_MOUSE	Q64282_K354	TB_24H-MOCK_24H	#NUM!		0	yes	4.84931	0.0398224	Interferon-induced protein with tetratricopeptide repeats 1 (IFIT-1) (Glucocorticoid-attenuated response gene 16 protein) (GARG-16) (Interferon-induced 56 kDa protein) (IFI-56K) (P56)
Q64282	Ifit1	IFIT1_MOUSE	Q64282_K406	TB_24H-MOCK_24H	#NUM!		0	yes	4.91827	0.0153313	Interferon-induced protein with tetratricopeptide repeats 1 (IFIT-1) (Glucocorticoid-attenuated response gene 16 protein) (GARG-16) (Interferon-induced 56 kDa protein) (IFI-56K) (P56)
Q64282	Ifit1	IFIT1_MOUSE	Q64282_K451	TB_24H-MOCK_24H	#NUM!		0	yes	7.2198	0.0486717	Interferon-induced protein with tetratricopeptide repeats 1 (IFIT-1) (Glucocorticoid-attenuated response gene 16 protein) (GARG-16) (Interferon-induced 56 kDa protein) (IFI-56K) (P56)
Q64282	Ifit1	IFIT1_MOUSE	Q64282_K123	TB_24H-MOCK_24H	#NUM!		0	yes	6.26722	0.0377064	Interferon-induced protein with tetratricopeptide repeats 1 (IFIT-1) (Glucocorticoid-attenuated response gene 16 protein) (GARG-16) (Interferon-induced 56 kDa protein) (IFI-56K) (P56)
Q64282	Ifit1	IFIT1_MOUSE	Q64282_K287	TB_24H-MOCK_24H	3.82888	1.16591e-06	2.44227e-05	no	3.82888	2.44227e-05	Interferon-induced protein with tetratricopeptide repeats 1 (IFIT-1) (Glucocorticoid-attenuated response gene 16 protein) (GARG-16) (Interferon-induced 56 kDa protein) (IFI-56K) (P56)
Q64282	Ifit1	IFIT1_MOUSE	Q64282_K282	TB_24H-MOCK_24H	#NUM!		0	yes	8.49005	0.0160121	Interferon-induced protein with tetratricopeptide repeats 1 (IFIT-1) (Glucocorticoid-attenuated response gene 16 protein) (GARG-16) (Interferon-induced 56 kDa protein) (IFI-56K) (P56)
Q64282	Ifit1	IFIT1_MOUSE	Q64282_K89	TB_24H-MOCK_24H	5.41453	3.49335e-10	2.6483e-08	no	5.41453	2.6483e-08	Interferon-induced protein with tetratricopeptide repeats 1 (IFIT-1) (Glucocorticoid-attenuated response gene 16 protein) (GARG-16) (Interferon-induced 56 kDa protein) (IFI-56K) (P56)
Q64282	Ifit1	IFIT1_MOUSE	Q64282_K155	TB_24H-MOCK_24H	#NUM!		0	yes	6.13271	0.0352086	Interferon-induced protein with tetratricopeptide repeats 1 (IFIT-1) (Glucocorticoid-attenuated response gene 16 protein) (GARG-16) (Interferon-induced 56 kDa protein) (IFI-56K) (P56)
Q64324	Stxbp2	STXB2_MOUSE	Q64324_K13	TB_24H-MOCK_24H	#NUM!		0	yes	4.28936	0.0231776	Syntaxin-binding protein 2 (MUSEC1) (Protein unc-18 homolog 2) (Munc18-2) (Unc18-2) (Protein unc-18 homolog B) (Unc-18B)
Q64337	Sqstm1	SQSTM_MOUSE	Q64337_K157	TB_24H-MOCK_24H	2.01471	0.000808264	0.00540654	no	2.01471	0.00540654	Sequestosome-1 (STONE14) (Ubiquitin-binding protein p62)
Q64337	Sqstm1	SQSTM_MOUSE	Q64337_K437	TB_24H-MOCK_24H	3.36573	9.94585e-05	0.000948132	no	3.36573	0.000948132	Sequestosome-1 (STONE14) (Ubiquitin-binding protein p62)
Q64337	Sqstm1	SQSTM_MOUSE	Q64337_K13	TB_24H-MOCK_24H	1.23089	0.0271922	0.088709	no	1.23089	0.088709	Sequestosome-1 (STONE14) (Ubiquitin-binding protein p62)
Q64345	Ifit3	IFIT3_MOUSE	Q64345_K156	TB_24H-MOCK_24H	#NUM!		0	yes	4.79343	0.0342572	Interferon-induced protein with tetratricopeptide repeats 3 (IFIT-3) (Glucocorticoid-attenuated response gene 49 protein) (GARG-49) (P49) (IRG2)
Q64345	Ifit3	IFIT3_MOUSE	Q64345_K266	TB_24H-MOCK_24H	#NUM!		0	yes	4.78021	0.0382352	Interferon-induced protein with tetratricopeptide repeats 3 (IFIT-3) (Glucocorticoid-attenuated response gene 49 protein) (GARG-49) (P49) (IRG2)
Q64345	Ifit3	IFIT3_MOUSE	Q64345_K253	TB_24H-MOCK_24H	3.1411	0.0698205	0.177211	no	3.1411	0.177211	Interferon-induced protein with tetratricopeptide repeats 3 (IFIT-3) (Glucocorticoid-attenuated response gene 49 protein) (GARG-49) (P49) (IRG2)
Q64373	Bcl2l1	B2CL1_MOUSE	Q64373_K87	TB_24H-MOCK_24H	0.775994	0.136187	0.289905	no	0.775994	0.289905	Bcl-2-like protein 1 (Bcl2-L-1) (Apoptosis regulator Bcl-X)
Q64455	Ptprj	PTPRJ_MOUSE	Q64455_K915	TB_24H-MOCK_24H	1.02285	0.00696905	0.0312425	no	1.02285	0.0312425	Receptor-type tyrosine-protein phosphatase eta (Protein-tyrosine phosphatase eta) (R-PTP-eta) (EC 3.1.3.48) (HPTP beta-like tyrosine phosphatase) (Protein-tyrosine phosphatase receptor type J) (R-PTP-J) (Susceptibility to colon cancer 1) (CD antigen CD148)
Q64475	Hist1h2bb	H2B1B_MOUSE	Q64475_K6	TB_24H-MOCK_24H	-0.272956	0.402039	0.587737	no	-0.272956	0.587737	Histone H2B type 1-B (h2B-143)
Q64523	Hist2h2ac	H2A2C_MOUSE	Q64523_K120	TB_24H-MOCK_24H	-1.19092	0.278909	0.464946	no	-1.19092	0.464946	Histone H2A type 2-C (H2a-613B)
Q64524	Hist2h2be	H2B2E_MOUSE	Q8CGP1_K121,Q64524_K121	TB_24H-MOCK_24H	-1.35694	0.2873	0.475943	no	-1.35694	0.475943	Histone H2B type 2-E (H2b 613)
Q64525	Hist2h2bb	H2B2B_MOUSE	Q64525_K6	TB_24H-MOCK_24H	-0.635681	0.00804708	0.0351949	no	-0.635681	0.0351949	Histone H2B type 2-B (H2b 616)
Q64737	Gart	PUR2_MOUSE	Q64737_K156	TB_24H-MOCK_24H	0.177776	0.644497	0.775675	no	0.177776	0.775675	Trifunctional purine biosynthetic protein adenosine-3 [Includes: Phosphoribosylamine--glycine ligase (EC 6.3.4.13) (Glycinamide ribonucleotide synthetase) (GARS) (Phosphoribosylglycinamide synthetase); Phosphoribosylformylglycinamidine cyclo-ligase (EC 6.3.3.1) (AIR synthase) (AIRS) (Phosphoribosyl-aminoimidazole synthetase); Phosphoribosylglycinamide formyltransferase (EC 2.1.2.2) (5'-phosphorib…
Q64737	Gart	PUR2_MOUSE	Q64737_K107	TB_24H-MOCK_24H	0.282691	0.276078	0.461677	no	0.282691	0.461677	Trifunctional purine biosynthetic protein adenosine-3 [Includes: Phosphoribosylamine--glycine ligase (EC 6.3.4.13) (Glycinamide ribonucleotide synthetase) (GARS) (Phosphoribosylglycinamide synthetase); Phosphoribosylformylglycinamidine cyclo-ligase (EC 6.3.3.1) (AIR synthase) (AIRS) (Phosphoribosyl-aminoimidazole synthetase); Phosphoribosylglycinamide formyltransferase (EC 2.1.2.2) (5'-phosphorib…
Q68FD5	Cltc	CLH1_MOUSE	Q68FD5_K619	TB_24H-MOCK_24H	#NUM!		0	yes	2.7465	0.0263307	Clathrin heavy chain 1
Q68FD5	Cltc	CLH1_MOUSE	Q68FD5_K1441	TB_24H-MOCK_24H	-0.858068	0.447614	0.628603	no	-0.858068	0.628603	Clathrin heavy chain 1
Q68FD5	Cltc	CLH1_MOUSE	Q68FD5_K1443	TB_24H-MOCK_24H	-1.03289	0.000268648	0.00216004	no	-1.03289	0.00216004	Clathrin heavy chain 1
Q68FD5	Cltc	CLH1_MOUSE	Q68FD5_K1516	TB_24H-MOCK_24H	0.550003	0.232053	0.415808	no	0.550003	0.415808	Clathrin heavy chain 1
Q68FD7	Fnip1	FNIP1_MOUSE	Q68FD7_K147	TB_24H-MOCK_24H	#NUM!		0	yes	5.76848	0.026161	Folliculin-interacting protein 1
Q68FD7	Fnip1	FNIP1_MOUSE	Q68FD7_K161	TB_24H-MOCK_24H	2.20608	0.000559229	0.00399234	no	2.20608	0.00399234	Folliculin-interacting protein 1
Q68FH4	Galk2	GALK2_MOUSE	Q68FH4_K333	TB_24H-MOCK_24H	0.107144	0.871903	0.925598	no	0.107144	0.925598	N-acetylgalactosamine kinase (EC 2.7.1.157) (GalNAc kinase) (Galactokinase 2)
Q68FH4	Galk2	GALK2_MOUSE	Q68FH4_K447	TB_24H-MOCK_24H	#NUM!		0	yes	2.01485	0.0322289	N-acetylgalactosamine kinase (EC 2.7.1.157) (GalNAc kinase) (Galactokinase 2)
Q68FH4	Galk2	GALK2_MOUSE	Q68FH4_K252	TB_24H-MOCK_24H	0.136384	0.803064	0.884148	no	0.136384	0.884148	N-acetylgalactosamine kinase (EC 2.7.1.157) (GalNAc kinase) (Galactokinase 2)
Q68FL4	Ahcyl2	SAHH3_MOUSE	Q68FL4_K191	TB_24H-MOCK_24H	1.12509	0.00263228	0.0148602	no	1.12509	0.0148602	Putative adenosylhomocysteinase 3 (AdoHcyase 3) (EC 3.3.1.1) (Long-IRBIT) (S-adenosyl-L-homocysteine hydrolase 3) (S-adenosylhomocysteine hydrolase-like protein 2)
Q69ZK0	Prex1	PREX1_MOUSE	Q69ZK0_K935	TB_24H-MOCK_24H	#NUM!		0	yes	6.01594	0.0363933	Phosphatidylinositol 3,4,5-trisphosphate-dependent Rac exchanger 1 protein (P-Rex1) (PtdIns(3,4,5)-dependent Rac exchanger 1)
Q69ZK0	Prex1	PREX1_MOUSE	Q69ZK0_K535	TB_24H-MOCK_24H	2.40854	3.41105e-12	7.7577e-10	no	2.40854	7.7577e-10	Phosphatidylinositol 3,4,5-trisphosphate-dependent Rac exchanger 1 protein (P-Rex1) (PtdIns(3,4,5)-dependent Rac exchanger 1)
Q69ZK0	Prex1	PREX1_MOUSE	Q69ZK0_K644	TB_24H-MOCK_24H	#NUM!		0	yes	3.88968	0.0371462	Phosphatidylinositol 3,4,5-trisphosphate-dependent Rac exchanger 1 protein (P-Rex1) (PtdIns(3,4,5)-dependent Rac exchanger 1)
Q69ZK0	Prex1	PREX1_MOUSE	Q69ZK0_K702	TB_24H-MOCK_24H	#NUM!		0	yes	5.98524	0.0291707	Phosphatidylinositol 3,4,5-trisphosphate-dependent Rac exchanger 1 protein (P-Rex1) (PtdIns(3,4,5)-dependent Rac exchanger 1)
Q69ZK0	Prex1	PREX1_MOUSE	Q69ZK0_K619	TB_24H-MOCK_24H	2.67092	1.0813e-07	3.31045e-06	no	2.67092	3.31045e-06	Phosphatidylinositol 3,4,5-trisphosphate-dependent Rac exchanger 1 protein (P-Rex1) (PtdIns(3,4,5)-dependent Rac exchanger 1)
Q69ZK0	Prex1	PREX1_MOUSE	Q69ZK0_K236	TB_24H-MOCK_24H	2.36061	8.83811e-08	2.87404e-06	no	2.36061	2.87404e-06	Phosphatidylinositol 3,4,5-trisphosphate-dependent Rac exchanger 1 protein (P-Rex1) (PtdIns(3,4,5)-dependent Rac exchanger 1)
Q69ZN7	Myof	MYOF_MOUSE	Q69ZN7_K110	TB_24H-MOCK_24H	#NUM!		0	yes	5.10925	0.0443379	Myoferlin (Fer-1-like protein 3)
Q69ZN7	Myof	MYOF_MOUSE	Q69ZN7_K1921	TB_24H-MOCK_24H	-0.0165058	0.980434	0.987881	no	-0.0165058	0.987881	Myoferlin (Fer-1-like protein 3)
Q69ZN7	Myof	MYOF_MOUSE	Q69ZN7_K1923	TB_24H-MOCK_24H	0.423192	0.550521	0.70794	no	0.423192	0.70794	Myoferlin (Fer-1-like protein 3)
Q69ZR2	Hectd1	HECD1_MOUSE	Q69ZR2_K255	TB_24H-MOCK_24H	0.367118	0.40069	0.586844	no	0.367118	0.586844	E3 ubiquitin-protein ligase HECTD1 (EC 2.3.2.26) (HECT domain-containing protein 1) (HECT-type E3 ubiquitin transferase HECTD1) (Protein open mind)
Q6NZC7	Sec23ip	S23IP_MOUSE	Q6NZC7_K869	TB_24H-MOCK_24H	-0.879772	0.294563	0.481957	no	-0.879772	0.481957	SEC23-interacting protein
Q6P542	Abcf1	ABCF1_MOUSE	Q6P542_K332	TB_24H-MOCK_24H	0.33194	0.512921	0.677652	no	0.33194	0.677652	ATP-binding cassette sub-family F member 1
Q6P5F7	Ttyh3	TTYH3_MOUSE	Q6P5F7_K508	TB_24H-MOCK_24H	-1.04661	0.00121408	0.00763957	no	-1.04661	0.00763957	Protein tweety homolog 3 (mTTY3)
Q6P8X1	Snx6	SNX6_MOUSE	Q6P8X1_K366	TB_24H-MOCK_24H	1.11438	0.264514	0.452803	no	1.11438	0.452803	Sorting nexin-6 [Cleaved into: Sorting nexin-6, N-terminally processed]
Q6P8X1	Snx6	SNX6_MOUSE	Q6P8X1_K307	TB_24H-MOCK_24H	2.50107	1.58445e-05	0.000192843	no	2.50107	0.000192843	Sorting nexin-6 [Cleaved into: Sorting nexin-6, N-terminally processed]
Q6P8X1	Snx6	SNX6_MOUSE	Q6P8X1_K230	TB_24H-MOCK_24H	1.02059	0.274101	0.460981	no	1.02059	0.460981	Sorting nexin-6 [Cleaved into: Sorting nexin-6, N-terminally processed]
Q6P9Q6	Fkbp15	FKB15_MOUSE	Q6P9Q6_K248	TB_24H-MOCK_24H	#NUM!		0	yes	3.14344	0.0463657	FK506-binding protein 15 (FKBP-15) (133 kDa FK506-binding protein) (133 kDa FKBP) (FKBP-133) (WASP and FKBP-like) (WAFL)
Q6PAR5	Gapvd1	GAPD1_MOUSE	Q6PAR5_K24	TB_24H-MOCK_24H	0.215969	0.64684	0.777184	no	0.215969	0.777184	GTPase-activating protein and VPS9 domain-containing protein 1 (GAPex-5) (Rab5-activating protein 6)
Q6PAR5	Gapvd1	GAPD1_MOUSE	Q6PAR5_K1368	TB_24H-MOCK_24H	#NUM!		0	yes	4.44427	0.0378296	GTPase-activating protein and VPS9 domain-containing protein 1 (GAPex-5) (Rab5-activating protein 6)
Q6PFQ7	Rasa4	RASL2_MOUSE	Q6PFQ7_K349	TB_24H-MOCK_24H	2.45074	5.68208e-06	8.29896e-05	no	2.45074	8.29896e-05	Ras GTPase-activating protein 4 (Calcium-promoted Ras inactivator) (Ras p21 protein activator 4) (RasGAP-activating-like protein 2)
Q6PFX9	Tnks	TNKS1_MOUSE	Q6PFX9_K764	TB_24H-MOCK_24H	-0.132556	0.662426	0.786932	no	-0.132556	0.786932	Tankyrase-1 (TANK1) (EC 2.4.2.30) (ADP-ribosyltransferase diphtheria toxin-like 5) (ARTD5) (TRF1-interacting ankyrin-related ADP-ribose polymerase 1) (Tankyrase I)
Q6PGG2	Gmip	GMIP_MOUSE	Q6PGG2_K188	TB_24H-MOCK_24H	1.48212	0.157556	0.320343	no	1.48212	0.320343	GEM-interacting protein (GMIP)
Q6PIC6	Atp1a3	AT1A3_MOUSE	Q8VDN2_K605,Q6PIC6_K595,Q6PIE5_K602	TB_24H-MOCK_24H	-0.399916	0.0177966	0.0638112	no	-0.399916	0.0638112	Sodium/potassium-transporting ATPase subunit alpha-3 (Na(+)/K(+) ATPase alpha-3 subunit) (EC 3.6.3.9) (Na(+)/K(+) ATPase alpha(III) subunit) (Sodium pump subunit alpha-3)
Q6Q899	Ddx58	DDX58_MOUSE	Q6Q899_K645	TB_24H-MOCK_24H	0.961654	0.0626698	0.165183	no	0.961654	0.165183	Probable ATP-dependent RNA helicase DDX58 (EC 3.6.4.13) (DEAD box protein 58) (RIG-I-like receptor 1) (RLR-1) (Retinoic acid-inducible gene 1 protein) (RIG-1) (Retinoic acid-inducible gene I protein) (RIG-I)
Q6Q899	Ddx58	DDX58_MOUSE	Q6Q899_K257	TB_24H-MOCK_24H	#NUM!		0	yes	6.58678	0.0289219	Probable ATP-dependent RNA helicase DDX58 (EC 3.6.4.13) (DEAD box protein 58) (RIG-I-like receptor 1) (RLR-1) (Retinoic acid-inducible gene 1 protein) (RIG-1) (Retinoic acid-inducible gene I protein) (RIG-I)
Q6Q899	Ddx58	DDX58_MOUSE	Q6Q899_K636	TB_24H-MOCK_24H	#NUM!		0	yes	2.62639	0.0447957	Probable ATP-dependent RNA helicase DDX58 (EC 3.6.4.13) (DEAD box protein 58) (RIG-I-like receptor 1) (RLR-1) (Retinoic acid-inducible gene 1 protein) (RIG-1) (Retinoic acid-inducible gene I protein) (RIG-I)
Q6Q899	Ddx58	DDX58_MOUSE	Q6Q899_K256	TB_24H-MOCK_24H	3.27146	6.87511e-07	1.5636e-05	no	3.27146	1.5636e-05	Probable ATP-dependent RNA helicase DDX58 (EC 3.6.4.13) (DEAD box protein 58) (RIG-I-like receptor 1) (RLR-1) (Retinoic acid-inducible gene 1 protein) (RIG-1) (Retinoic acid-inducible gene I protein) (RIG-I)
Q6Q899	Ddx58	DDX58_MOUSE	Q6Q899_K259	TB_24H-MOCK_24H	#NUM!		0	yes	5.84325	0.0274863	Probable ATP-dependent RNA helicase DDX58 (EC 3.6.4.13) (DEAD box protein 58) (RIG-I-like receptor 1) (RLR-1) (Retinoic acid-inducible gene 1 protein) (RIG-1) (Retinoic acid-inducible gene I protein) (RIG-I)
Q6Y5D8	Arhgap10	RHG10_MOUSE	Q6Y5D8_K460	TB_24H-MOCK_24H	0.767955	0.0151558	0.0570404	no	0.767955	0.0570404	Rho GTPase-activating protein 10 (PH and SH3 domain-containing rhoGAP protein) (PS-GAP) (PSGAP) (Rho-type GTPase-activating protein 10)
Q6ZQ58	Larp1	LARP1_MOUSE	Q6ZQ58_K769	TB_24H-MOCK_24H	-1.98762	1.81932e-05	0.000217096	no	-1.98762	0.000217096	La-related protein 1 (La ribonucleoprotein domain family member 1)
Q6ZQ82	Arhgap26	RHG26_MOUSE	Q6ZQ82_K454	TB_24H-MOCK_24H	0.233918	0.482753	0.662479	no	0.233918	0.662479	Rho GTPase-activating protein 26 (Rho-type GTPase-activating protein 26)
Q6ZWN5	Rps9	RS9_MOUSE	Q6ZWN5_K139	TB_24H-MOCK_24H	#NUM!		0	yes	2.69581	0.0150538	40S ribosomal protein S9
Q6ZWN5	Rps9	RS9_MOUSE	Q6ZWN5_K155	TB_24H-MOCK_24H	0.226994	0.632639	0.768826	no	0.226994	0.768826	40S ribosomal protein S9
Q6ZWQ0	Syne2	SYNE2_MOUSE	Q6ZWQ0_K958	TB_24H-MOCK_24H	0.590956	0.603903	0.745282	no	0.590956	0.745282	Nesprin-2 (Nuclear envelope spectrin repeat protein 2) (Nucleus and actin connecting element protein) (Protein NUANCE) (Synaptic nuclear envelope protein 2) (Syne-2)
Q6ZWV3	Rpl10	RL10_MOUSE	Q6ZWV3_K198	TB_24H-MOCK_24H	0.456972	0.330162	0.518873	no	0.456972	0.518873	60S ribosomal protein L10 (Protein QM homolog)
Q6ZWV7	Rpl35	RL35_MOUSE	Q6ZWV7_K43	TB_24H-MOCK_24H	0.727213	0.0117279	0.0477515	no	0.727213	0.0477515	60S ribosomal protein L35
Q6ZWV7	Rpl35	RL35_MOUSE	Q6ZWV7_K46	TB_24H-MOCK_24H	#NUM!		0	yes	3.62012	0.0141581	60S ribosomal protein L35
Q76MZ3	Ppp2r1a	2AAA_MOUSE	Q76MZ3_K188,Q7TNP2_K200	TB_24H-MOCK_24H	-0.041023	0.871555	0.925598	no	-0.041023	0.925598	Serine/threonine-protein phosphatase 2A 65 kDa regulatory subunit A alpha isoform (PP2A subunit A isoform PR65-alpha) (PP2A subunit A isoform R1-alpha)
Q76MZ3	Ppp2r1a	2AAA_MOUSE	Q76MZ3_K266	TB_24H-MOCK_24H	0.17387	0.811594	0.890124	no	0.17387	0.890124	Serine/threonine-protein phosphatase 2A 65 kDa regulatory subunit A alpha isoform (PP2A subunit A isoform PR65-alpha) (PP2A subunit A isoform R1-alpha)
Q76MZ3	Ppp2r1a	2AAA_MOUSE	Q76MZ3_K542,Q7TNP2_K554	TB_24H-MOCK_24H	0.203091	0.58037	0.729235	no	0.203091	0.729235	Serine/threonine-protein phosphatase 2A 65 kDa regulatory subunit A alpha isoform (PP2A subunit A isoform PR65-alpha) (PP2A subunit A isoform R1-alpha)
Q76MZ3	Ppp2r1a	2AAA_MOUSE	Q76MZ3_K163	TB_24H-MOCK_24H	-0.45144	0.732592	0.837849	no	-0.45144	0.837849	Serine/threonine-protein phosphatase 2A 65 kDa regulatory subunit A alpha isoform (PP2A subunit A isoform PR65-alpha) (PP2A subunit A isoform R1-alpha)
Q78PY7	Snd1	SND1_MOUSE	Q78PY7_K513	TB_24H-MOCK_24H	-0.0189736	0.95293	0.969745	no	-0.0189736	0.969745	Staphylococcal nuclease domain-containing protein 1 (100 kDa coactivator) (p100 co-activator)
Q78ZA7	Nap1l4	NP1L4_MOUSE	Q78ZA7_K71	TB_24H-MOCK_24H	0.54657	0.274101	0.460981	no	0.54657	0.460981	Nucleosome assembly protein 1-like 4
Q7M6Y3	Picalm	PICAL_MOUSE	Q7M6Y3_K134	TB_24H-MOCK_24H	1.84	0.000228244	0.00188272	no	1.84	0.00188272	Phosphatidylinositol-binding clathrin assembly protein (Clathrin assembly lymphoid myeloid leukemia) (CALM)
Q7M6Y3	Picalm	PICAL_MOUSE	Q7M6Y3_K24	TB_24H-MOCK_24H	0.164027	0.654778	0.783175	no	0.164027	0.783175	Phosphatidylinositol-binding clathrin assembly protein (Clathrin assembly lymphoid myeloid leukemia) (CALM)
Q7TMB8	Cyfip1	CYFP1_MOUSE	Q7TMB8_K1053	TB_24H-MOCK_24H	#NUM!		0	yes	3.82285	0.0276857	Cytoplasmic FMR1-interacting protein 1 (Specifically Rac1-associated protein 1) (Sra-1)
Q7TMB8	Cyfip1	CYFP1_MOUSE	Q7TMB8_K546	TB_24H-MOCK_24H	0.605698	0.0655605	0.169436	no	0.605698	0.169436	Cytoplasmic FMR1-interacting protein 1 (Specifically Rac1-associated protein 1) (Sra-1)
Q7TMK9	Syncrip	HNRPQ_MOUSE	Q7TMK9_K363	TB_24H-MOCK_24H	-0.601194	0.0237281	0.0802184	no	-0.601194	0.0802184	Heterogeneous nuclear ribonucleoprotein Q (hnRNP Q) (Glycine- and tyrosine-rich RNA-binding protein) (GRY-RBP) (NS1-associated protein 1) (Synaptotagmin-binding, cytoplasmic RNA-interacting protein) (pp68)
Q7TMY8	Huwe1	HUWE1_MOUSE	Q7TMY8_K3453	TB_24H-MOCK_24H	-0.342605	0.448802	0.628955	no	-0.342605	0.628955	E3 ubiquitin-protein ligase HUWE1 (EC 2.3.2.26) (E3Histone) (HECT, UBA and WWE domain-containing protein 1) (HECT-type E3 ubiquitin transferase HUWE1) (Upstream regulatory element-binding protein 1) (URE-B1) (URE-binding protein 1)
Q7TMY8	Huwe1	HUWE1_MOUSE	Q7TMY8_K1111	TB_24H-MOCK_24H	#NUM!		0	yes	2.75271	0.0228522	E3 ubiquitin-protein ligase HUWE1 (EC 2.3.2.26) (E3Histone) (HECT, UBA and WWE domain-containing protein 1) (HECT-type E3 ubiquitin transferase HUWE1) (Upstream regulatory element-binding protein 1) (URE-B1) (URE-binding protein 1)
Q7TPH6	Mycbp2	MYCB2_MOUSE	Q7TPH6_K3821	TB_24H-MOCK_24H	#NUM!		0	yes	5.13984	0.0206592	E3 ubiquitin-protein ligase MYCBP2 (EC 6.3.2.-) (Myc-binding protein 2) (Pam/highwire/rpm-1 protein) (Protein associated with Myc)
Q7TSE6	Stk38l	ST38L_MOUSE	Q91VJ4_K238,Q7TSE6_K239	TB_24H-MOCK_24H	0.0112222	0.974	0.985139	no	0.0112222	0.985139	Serine/threonine-protein kinase 38-like (EC 2.7.11.1) (NDR2 protein kinase) (Nuclear Dbf2-related kinase 2)
Q7TT45	Rragd	RRAGD_MOUSE	Q99K70_K78,Q7TT45_K129	TB_24H-MOCK_24H	-0.0332829	0.915164	0.950385	no	-0.0332829	0.950385	Ras-related GTP-binding protein D (Rag D) (RagD)
Q80SU7	Gvin1	GVIN1_MOUSE	Q80SU7_K196	TB_24H-MOCK_24H	#NUM!		0	yes	4.92005	0.0325016	Interferon-induced very large GTPase 1 (Very large-inducible GTPase-1) (VLIG-1)
Q80SU7	Gvin1	GVIN1_MOUSE	Q80SU7_K206	TB_24H-MOCK_24H	#NUM!		0	yes	5.8954	0.0496601	Interferon-induced very large GTPase 1 (Very large-inducible GTPase-1) (VLIG-1)
Q80SU7	Gvin1	GVIN1_MOUSE	Q80SU7_K1310	TB_24H-MOCK_24H	2.5175	8.34262e-07	1.79479e-05	no	2.5175	1.79479e-05	Interferon-induced very large GTPase 1 (Very large-inducible GTPase-1) (VLIG-1)
Q80SU7	Gvin1	GVIN1_MOUSE	Q80SU7_K867	TB_24H-MOCK_24H	#NUM!		0	yes	6.03988	0.0258587	Interferon-induced very large GTPase 1 (Very large-inducible GTPase-1) (VLIG-1)
Q80SU7	Gvin1	GVIN1_MOUSE	Q80SU7_K2401	TB_24H-MOCK_24H	#NUM!		0	yes	4.60283	0.0183783	Interferon-induced very large GTPase 1 (Very large-inducible GTPase-1) (VLIG-1)
Q80SU7	Gvin1	GVIN1_MOUSE	Q80SU7_K1081	TB_24H-MOCK_24H	#NUM!		0	yes	4.69501	0.0271696	Interferon-induced very large GTPase 1 (Very large-inducible GTPase-1) (VLIG-1)
Q80SU7	Gvin1	GVIN1_MOUSE	Q80SU7_K880	TB_24H-MOCK_24H	#NUM!		0	yes	5.74722	0.0451593	Interferon-induced very large GTPase 1 (Very large-inducible GTPase-1) (VLIG-1)
Q80SY4	Mib1	MIB1_MOUSE	Q80SY4_K420	TB_24H-MOCK_24H	-1.46199	8.08149e-06	0.0001075	no	-1.46199	0.0001075	E3 ubiquitin-protein ligase MIB1 (EC 6.3.2.-) (DAPK-interacting protein 1) (DIP-1) (Mind bomb homolog 1)
Q80SY4	Mib1	MIB1_MOUSE	Q80SY4_K896	TB_24H-MOCK_24H	#NUM!		0	yes	-5.18202	0.010406	E3 ubiquitin-protein ligase MIB1 (EC 6.3.2.-) (DAPK-interacting protein 1) (DIP-1) (Mind bomb homolog 1)
Q80SZ7	Gng5	GBG5_MOUSE	Q80SZ7_K11	TB_24H-MOCK_24H	-0.252177	0.422725	0.607381	no	-0.252177	0.607381	Guanine nucleotide-binding protein G(I)/G(S)/G(O) subunit gamma-5
Q80TM9	Nisch	NISCH_MOUSE	Q80TM9_K1020	TB_24H-MOCK_24H	0.264149	0.668465	0.791224	no	0.264149	0.791224	Nischarin (Imidazoline receptor 1) (I-1) (IR1) (Imidazoline receptor I-1-like protein) (Imidazoline-1 receptor) (I1R)
Q80U44	Zfyve16	ZFY16_MOUSE	Q80U44_K1245	TB_24H-MOCK_24H	-0.379532	0.0552682	0.151617	no	-0.379532	0.151617	Zinc finger FYVE domain-containing protein 16 (Endofin) (Endosomal-associated FYVE domain protein)
Q80UP5	Ankrd13a	AN13A_MOUSE	Q80UP5_K239	TB_24H-MOCK_24H	0.207073	0.680145	0.799698	no	0.207073	0.799698	Ankyrin repeat domain-containing protein 13A
Q80UP5	Ankrd13a	AN13A_MOUSE	Q80UP5_K219	TB_24H-MOCK_24H	0.46345	0.413121	0.597899	no	0.46345	0.597899	Ankyrin repeat domain-containing protein 13A
Q80VP1	Epn1	EPN1_MOUSE	Q80VP1_K149	TB_24H-MOCK_24H	0.898409	0.101925	0.23381	no	0.898409	0.23381	Epsin-1 (EPS-15-interacting protein 1) (Intersectin-EH-binding protein 1) (Ibp1)
Q80VQ0	Aldh3b1	AL3B1_MOUSE	Q80VQ0_K375	TB_24H-MOCK_24H	0.393944	0.571192	0.723491	no	0.393944	0.723491	Aldehyde dehydrogenase family 3 member B1 (EC 1.2.1.5) (Aldehyde dehydrogenase 7)
Q80ZD3	Slc26a11	S2611_MOUSE	Q80ZD3_K588	TB_24H-MOCK_24H	-1.221	0.0465323	0.133476	no	-1.221	0.133476	Sodium-independent sulfate anion transporter (Solute carrier family 26 member 11)
Q810B6	Ankfy1	ANFY1_MOUSE	Q810B6_K937	TB_24H-MOCK_24H	-0.942842	0.0901929	0.213037	no	-0.942842	0.213037	Rabankyrin-5 (Rank-5) (Ankyrin repeat and FYVE domain-containing protein 1) (Ankyrin repeats hooked to a zinc finger motif)
Q810B6	Ankfy1	ANFY1_MOUSE	Q810B6_K1136	TB_24H-MOCK_24H	-0.152249	0.699692	0.813735	no	-0.152249	0.813735	Rabankyrin-5 (Rank-5) (Ankyrin repeat and FYVE domain-containing protein 1) (Ankyrin repeats hooked to a zinc finger motif)
Q810B6	Ankfy1	ANFY1_MOUSE	Q810B6_K858	TB_24H-MOCK_24H	0.571179	0.142093	0.296866	no	0.571179	0.296866	Rabankyrin-5 (Rank-5) (Ankyrin repeat and FYVE domain-containing protein 1) (Ankyrin repeats hooked to a zinc finger motif)
Q8BG60	Txnip	TXNIP_MOUSE	Q8BG60_K234	TB_24H-MOCK_24H	-0.262389	0.609107	0.749858	no	-0.262389	0.749858	Thioredoxin-interacting protein (Vitamin D3 up-regulated protein 1)
Q8BGQ7	Aars	SYAC_MOUSE	Q8BGQ7_K74	TB_24H-MOCK_24H	2.05408	8.11572e-05	0.000792652	no	2.05408	0.000792652	Alanine--tRNA ligase, cytoplasmic (EC 6.1.1.7) (Alanyl-tRNA synthetase) (AlaRS)
Q8BH02	Tor4a	TOR4A_MOUSE	Q8BH02_K13	TB_24H-MOCK_24H	0.00691864	0.991813	0.994311	no	0.00691864	0.994311	Torsin-4A (Torsin family 4 member A)
Q8BH64	Ehd2	EHD2_MOUSE	Q9EQP2_K378,Q8BH64_K375	TB_24H-MOCK_24H	0.462316	0.33	0.518873	no	0.462316	0.518873	EH domain-containing protein 2
Q8BHK6	Slamf7	SLAF7_MOUSE	Q8BHK6_K312	TB_24H-MOCK_24H	#NUM!		0	yes	2.56973	0.0151039	SLAM family member 7 (Leukocyte cell-surface antigen) (Novel Ly9) (CD antigen CD319)
Q8BIK4	Dock9	DOCK9_MOUSE	Q8BIK4_K1579	TB_24H-MOCK_24H	#NUM!		0	yes	5.07101	0.0139815	Dedicator of cytokinesis protein 9 (Cdc42 guanine nucleotide exchange factor zizimin-1)
Q8BJH1	Zc2hc1a	ZC21A_MOUSE	Q8BJH1_K238	TB_24H-MOCK_24H	-0.923034	0.103166	0.234964	no	-0.923034	0.234964	Zinc finger C2HC domain-containing protein 1A
Q8BJU0	Sgta	SGTA_MOUSE	Q8BJU0_K161	TB_24H-MOCK_24H	-0.755998	0.207168	0.382611	no	-0.755998	0.382611	Small glutamine-rich tetratricopeptide repeat-containing protein alpha (Alpha-SGT)
Q8BJU0	Sgta	SGTA_MOUSE	Q8BJU0_K201	TB_24H-MOCK_24H	0.887989	0.23204	0.415808	no	0.887989	0.415808	Small glutamine-rich tetratricopeptide repeat-containing protein alpha (Alpha-SGT)
Q8BJY1	Psmd5	PSMD5_MOUSE	Q8BJY1_K147	TB_24H-MOCK_24H	0.0498104	0.84868	0.911994	no	0.0498104	0.911994	26S proteasome non-ATPase regulatory subunit 5 (26S protease subunit S5 basic) (26S proteasome subunit S5B)
Q8BP47	Nars	SYNC_MOUSE	Q8BP47_K255	TB_24H-MOCK_24H	0.547356	0.347348	0.532221	no	0.547356	0.532221	Asparagine--tRNA ligase, cytoplasmic (EC 6.1.1.22) (Asparaginyl-tRNA synthetase) (AsnRS)
Q8BP47	Nars	SYNC_MOUSE	Q8BP47_K456	TB_24H-MOCK_24H	0.533699	0.174953	0.344235	no	0.533699	0.344235	Asparagine--tRNA ligase, cytoplasmic (EC 6.1.1.22) (Asparaginyl-tRNA synthetase) (AsnRS)
Q8BP67	Rpl24	RL24_MOUSE	Q8BP67_K147	TB_24H-MOCK_24H	-0.409929	0.403462	0.587964	no	-0.409929	0.587964	60S ribosomal protein L24
Q8BP67	Rpl24	RL24_MOUSE	Q8BP67_K43	TB_24H-MOCK_24H	#NUM!		0	yes	2.72364	0.013414	60S ribosomal protein L24
Q8BP67	Rpl24	RL24_MOUSE	Q8BP67_K135	TB_24H-MOCK_24H	-0.0437158	0.899661	0.939187	no	-0.0437158	0.939187	60S ribosomal protein L24
Q8BP67	Rpl24	RL24_MOUSE	Q8BP67_K27	TB_24H-MOCK_24H	0.703632	0.0380428	0.114488	no	0.703632	0.114488	60S ribosomal protein L24
Q8BP67	Rpl24	RL24_MOUSE	Q8BP67_K131	TB_24H-MOCK_24H	0.222312	0.611337	0.750964	no	0.222312	0.750964	60S ribosomal protein L24
Q8BP67	Rpl24	RL24_MOUSE	Q8BP67_K93	TB_24H-MOCK_24H	0.444976	0.137436	0.291343	no	0.444976	0.291343	60S ribosomal protein L24
Q8BP97	Rhbdd3	RHBD3_MOUSE	Q8BP97_K268	TB_24H-MOCK_24H	-0.418447	0.479198	0.658794	no	-0.418447	0.658794	Rhomboid domain-containing protein 3
Q8BRH3	Arhgap19	RHG19_MOUSE	Q8BRH3_K388	TB_24H-MOCK_24H	0.131244	0.830745	0.899559	no	0.131244	0.899559	Rho GTPase-activating protein 19 (Rho-type GTPase-activating protein 19)
Q8BTF8	Ralyl	RALYL_MOUSE	Q9Z204_K42,Q8BTF8_K47	TB_24H-MOCK_24H	-1.96899	0.00016928	0.00148892	no	-1.96899	0.00148892	RNA-binding Raly-like protein
Q8BTM8	Flna	FLNA_MOUSE	Q8BTM8_K1294	TB_24H-MOCK_24H	-0.0350292	0.872444	0.925598	no	-0.0350292	0.925598	Filamin-A (FLN-A) (Actin-binding protein 280) (ABP-280) (Alpha-filamin) (Endothelial actin-binding protein) (Filamin-1) (Non-muscle filamin)
Q8BTM8	Flna	FLNA_MOUSE	Q8BTM8_K578	TB_24H-MOCK_24H	-1.34085	0.0357207	0.110208	no	-1.34085	0.110208	Filamin-A (FLN-A) (Actin-binding protein 280) (ABP-280) (Alpha-filamin) (Endothelial actin-binding protein) (Filamin-1) (Non-muscle filamin)
Q8BTM8	Flna	FLNA_MOUSE	Q8BTM8_K2563	TB_24H-MOCK_24H	#NUM!		0	yes	-2.94191	0.041067	Filamin-A (FLN-A) (Actin-binding protein 280) (ABP-280) (Alpha-filamin) (Endothelial actin-binding protein) (Filamin-1) (Non-muscle filamin)
Q8BTM8	Flna	FLNA_MOUSE	Q8BTM8_K904	TB_24H-MOCK_24H	-0.683216	0.177374	0.347184	no	-0.683216	0.347184	Filamin-A (FLN-A) (Actin-binding protein 280) (ABP-280) (Alpha-filamin) (Endothelial actin-binding protein) (Filamin-1) (Non-muscle filamin)
Q8BUR4	Dock1	DOCK1_MOUSE	Q8BUR4_K291	TB_24H-MOCK_24H	#NUM!		0	yes	5.60544	0.0218339	Dedicator of cytokinesis protein 1 (180 kDa protein downstream of CRK) (DOCK180)
Q8BVE3	Atp6v1h	VATH_MOUSE	Q8BVE3_K22	TB_24H-MOCK_24H	#NUM!		0	yes	3.92657	0.0106394	V-type proton ATPase subunit H (V-ATPase subunit H) (Vacuolar proton pump subunit H)
Q8BVK9	Sp110	SP110_MOUSE	Q8BVK9_K191	TB_24H-MOCK_24H	1.74615	0.00230413	0.0131948	no	1.74615	0.0131948	Sp110 nuclear body protein (Intracellular pathogen resistance protein 1)
Q8BVW3	Trim14	TRI14_MOUSE	Q8BVW3_K262	TB_24H-MOCK_24H	0.304551	0.433283	0.616107	no	0.304551	0.616107	Tripartite motif-containing protein 14 (PU.1-binding protein)
Q8BVW3	Trim14	TRI14_MOUSE	Q8BVW3_K128	TB_24H-MOCK_24H	#NUM!		0	yes	4.61827	0.0154785	Tripartite motif-containing protein 14 (PU.1-binding protein)
Q8BVW3	Trim14	TRI14_MOUSE	Q8BVW3_K129	TB_24H-MOCK_24H	#NUM!		0	yes	4.59477	0.0463007	Tripartite motif-containing protein 14 (PU.1-binding protein)
Q8BVW3	Trim14	TRI14_MOUSE	Q8BVW3_K244	TB_24H-MOCK_24H	1.43292	0.000544513	0.00392246	no	1.43292	0.00392246	Tripartite motif-containing protein 14 (PU.1-binding protein)
Q8BX57	Pxk	PXK_MOUSE	Q8BX57_K266	TB_24H-MOCK_24H	3.56556	1.27613e-06	2.59591e-05	no	3.56556	2.59591e-05	PX domain-containing protein kinase-like protein (Modulator of Na,K-ATPase) (MONaKA)
Q8BX65	Mdfic	MDFIC_MOUSE	Q8BX65_K131	TB_24H-MOCK_24H	-0.505485	0.255272	0.442211	no	-0.505485	0.442211	MyoD family inhibitor domain-containing protein (I-mfa domain-containing protein) (Kidney cell line-derived transcript 1)
Q8BX70	Vps13c	VP13C_MOUSE	Q8BX70_K2150	TB_24H-MOCK_24H	-0.207805	0.532776	0.692391	no	-0.207805	0.692391	Vacuolar protein sorting-associated protein 13C
Q8BX70	Vps13c	VP13C_MOUSE	Q8BX70_K2422	TB_24H-MOCK_24H	0.829819	0.358541	0.544175	no	0.829819	0.544175	Vacuolar protein sorting-associated protein 13C
Q8BX90	Fndc3a	FND3A_MOUSE	Q8BX90_K440	TB_24H-MOCK_24H	#NUM!		0	yes	6.39721	0.0249256	Fibronectin type-III domain-containing protein 3A
Q8BYH7	Tbc1d17	TBC17_MOUSE	Q8BYH7_K303	TB_24H-MOCK_24H	-0.191539	0.520908	0.682749	no	-0.191539	0.682749	TBC1 domain family member 17
Q8BZ20	Parp12	PAR12_MOUSE	Q8BZ20_K251	TB_24H-MOCK_24H	2.15316	0.0382765	0.114974	no	2.15316	0.114974	Poly [ADP-ribose] polymerase 12 (PARP-12) (EC 2.4.2.30) (ADP-ribosyltransferase diphtheria toxin-like 12) (ARTD12) (Zinc finger CCCH domain-containing protein 1)
Q8BZ20	Parp12	PAR12_MOUSE	Q8BZ20_K456	TB_24H-MOCK_24H	2.2978	4.54351e-07	1.13611e-05	no	2.2978	1.13611e-05	Poly [ADP-ribose] polymerase 12 (PARP-12) (EC 2.4.2.30) (ADP-ribosyltransferase diphtheria toxin-like 12) (ARTD12) (Zinc finger CCCH domain-containing protein 1)
Q8BZ20	Parp12	PAR12_MOUSE	Q8BZ20_K487	TB_24H-MOCK_24H	1.10184	0.00035369	0.00273337	no	1.10184	0.00273337	Poly [ADP-ribose] polymerase 12 (PARP-12) (EC 2.4.2.30) (ADP-ribosyltransferase diphtheria toxin-like 12) (ARTD12) (Zinc finger CCCH domain-containing protein 1)
Q8BZ20	Parp12	PAR12_MOUSE	Q8BZ20_K481	TB_24H-MOCK_24H	#NUM!		0	yes	4.10455	0.0414305	Poly [ADP-ribose] polymerase 12 (PARP-12) (EC 2.4.2.30) (ADP-ribosyltransferase diphtheria toxin-like 12) (ARTD12) (Zinc finger CCCH domain-containing protein 1)
Q8C052	Map1s	MAP1S_MOUSE	Q8C052_K528	TB_24H-MOCK_24H	#NUM!		0	yes	-4.25768	0.0485248	Microtubule-associated protein 1S (MAP-1S) (BPY2-interacting protein 1) (Microtubule-associated protein 8) [Cleaved into: MAP1S heavy chain; MAP1S light chain]
Q8C0E3	Trim47	TRI47_MOUSE	Q8C0E3_K261	TB_24H-MOCK_24H	1.07699	0.358568	0.544175	no	1.07699	0.544175	Tripartite motif-containing protein 47
Q8C0L6	Paox	PAOX_MOUSE	Q8C0L6_K23	TB_24H-MOCK_24H	0.875349	0.0333236	0.104432	no	0.875349	0.104432	Peroxisomal N(1)-acetyl-spermine/spermidine oxidase (EC 1.5.3.13) (Polyamine oxidase)
Q8C0V0	Tlk1	TLK1_MOUSE	Q8C0V0_K485	TB_24H-MOCK_24H	#NUM!		0	yes	3.40236	0.045462	Serine/threonine-protein kinase tousled-like 1 (EC 2.7.11.1) (Tousled-like kinase 1)
Q8C156	Ncaph	CND2_MOUSE	Q8C156_K15	TB_24H-MOCK_24H	#NUM!		0	yes	-3.96995	0.0459107	Condensin complex subunit 2 (Barren homolog protein 1) (Chromosome-associated protein H) (mCAP-H) (Non-SMC condensin I complex subunit H) (XCAP-H homolog)
Q8C156	Ncaph	CND2_MOUSE	Q8C156_K38	TB_24H-MOCK_24H	#NUM!		0	yes	-5.67557	0.0471575	Condensin complex subunit 2 (Barren homolog protein 1) (Chromosome-associated protein H) (mCAP-H) (Non-SMC condensin I complex subunit H) (XCAP-H homolog)
Q8C3J5	Dock2	DOCK2_MOUSE	Q8C3J5_K151	TB_24H-MOCK_24H	0.609698	0.0343209	0.10697	no	0.609698	0.10697	Dedicator of cytokinesis protein 2 (Protein Hch)
Q8C6G8	Wdr26	WDR26_MOUSE	Q8C6G8_K192	TB_24H-MOCK_24H	1.08689	0.00010986	0.00102279	no	1.08689	0.00102279	WD repeat-containing protein 26
Q8C7R4	Uba6	UBA6_MOUSE	Q8C7R4_K95	TB_24H-MOCK_24H	-0.0361945	0.897293	0.937945	no	-0.0361945	0.937945	Ubiquitin-like modifier-activating enzyme 6 (Ubiquitin-activating enzyme 6) (EC 6.2.1.45) (Ubiquitin-activating enzyme E1-like protein 2) (E1-L2)
Q8C7R4	Uba6	UBA6_MOUSE	Q8C7R4_K307	TB_24H-MOCK_24H	-0.807473	0.0171357	0.0621411	no	-0.807473	0.0621411	Ubiquitin-like modifier-activating enzyme 6 (Ubiquitin-activating enzyme 6) (EC 6.2.1.45) (Ubiquitin-activating enzyme E1-like protein 2) (E1-L2)
Q8C7R4	Uba6	UBA6_MOUSE	Q8C7R4_K295	TB_24H-MOCK_24H	-1.15385	0.141875	0.2968	no	-1.15385	0.2968	Ubiquitin-like modifier-activating enzyme 6 (Ubiquitin-activating enzyme 6) (EC 6.2.1.45) (Ubiquitin-activating enzyme E1-like protein 2) (E1-L2)
Q8CAS9	Parp9	PARP9_MOUSE	Q8CAS9_K168	TB_24H-MOCK_24H	#NUM!		0	yes	5.55581	0.0260205	Poly [ADP-ribose] polymerase 9 (PARP-9) (EC 2.4.2.30) (ADP-ribosyltransferase diphtheria toxin-like 9) (ARTD9) (B aggressive lymphoma protein homolog)
Q8CBA2	Slfn5	SLFN5_MOUSE	Q8CBA2_K473	TB_24H-MOCK_24H	#NUM!		0	yes	2.85209	0.0315887	Schlafen family member 5
Q8CBA2	Slfn5	SLFN5_MOUSE	Q8CBA2_K361	TB_24H-MOCK_24H	#NUM!		0	yes	6.88073	0.0283531	Schlafen family member 5
Q8CBA2	Slfn5	SLFN5_MOUSE	Q8CBA2_K136	TB_24H-MOCK_24H	3.3949	1.21551e-09	6.91106e-08	no	3.3949	6.91106e-08	Schlafen family member 5
Q8CBA2	Slfn5	SLFN5_MOUSE	Q8CBA2_K355	TB_24H-MOCK_24H	3.8326	5.20323e-07	1.25508e-05	no	3.8326	1.25508e-05	Schlafen family member 5
Q8CBB9	Rsad2	RSAD2_MOUSE	Q8CBB9_K220	TB_24H-MOCK_24H	#NUM!		0	yes	5.13671	0.0239416	Radical S-adenosyl methionine domain-containing protein 2 (Viperin) (Virus inhibitory protein, endoplasmic reticulum-associated, interferon-inducible)
Q8CBB9	Rsad2	RSAD2_MOUSE	Q8CBB9_K114	TB_24H-MOCK_24H	#NUM!		0	yes	5.63024	0.0292624	Radical S-adenosyl methionine domain-containing protein 2 (Viperin) (Virus inhibitory protein, endoplasmic reticulum-associated, interferon-inducible)
Q8CBB9	Rsad2	RSAD2_MOUSE	Q8CBB9_K107	TB_24H-MOCK_24H	#NUM!		0	yes	6.50454	0.0366906	Radical S-adenosyl methionine domain-containing protein 2 (Viperin) (Virus inhibitory protein, endoplasmic reticulum-associated, interferon-inducible)
Q8CBB9	Rsad2	RSAD2_MOUSE	Q8CBB9_K139	TB_24H-MOCK_24H	#NUM!		0	yes	4.97982	0.0117172	Radical S-adenosyl methionine domain-containing protein 2 (Viperin) (Virus inhibitory protein, endoplasmic reticulum-associated, interferon-inducible)
Q8CCK0	H2afy2	H2AW_MOUSE	Q8CCK0_K116,Q8CCK0_K117	TB_24H-MOCK_24H	0.0645124	0.977627	0.986554	no	0.0645124	0.986554	Core histone macro-H2A.2 (Histone macroH2A2) (mH2A2)
Q8CDN8	Ccdc38	CCD38_MOUSE	Q8CDN8_K256	TB_24H-MOCK_24H	-1.64252	0.485146	0.663297	no	-1.64252	0.663297	Coiled-coil domain-containing protein 38
Q8CFB4	Gbp5	GBP5_MOUSE	Q8CFB4_K546	TB_24H-MOCK_24H	#NUM!		0	yes	6.18075	0.025071	Guanylate-binding protein 5 (EC 3.6.5.-) (GTP-binding protein 5) (GBP-5) (MuGBP-5) (Guanine nucleotide-binding protein 5)
Q8CFB4	Gbp5	GBP5_MOUSE	Q8CFB4_K534	TB_24H-MOCK_24H	#NUM!		0	yes	5.31912	0.0201732	Guanylate-binding protein 5 (EC 3.6.5.-) (GTP-binding protein 5) (GBP-5) (MuGBP-5) (Guanine nucleotide-binding protein 5)
Q8CFB4	Gbp5	GBP5_MOUSE	Q8CFB4_K443	TB_24H-MOCK_24H	#NUM!		0	yes	4.69352	0.0485088	Guanylate-binding protein 5 (EC 3.6.5.-) (GTP-binding protein 5) (GBP-5) (MuGBP-5) (Guanine nucleotide-binding protein 5)
Q8CFB4	Gbp5	GBP5_MOUSE	Q8CFB4_K227	TB_24H-MOCK_24H	#NUM!		0	yes	5.42307	0.0187565	Guanylate-binding protein 5 (EC 3.6.5.-) (GTP-binding protein 5) (GBP-5) (MuGBP-5) (Guanine nucleotide-binding protein 5)
Q8CFB4	Gbp5	GBP5_MOUSE	Q8CFB4_K279	TB_24H-MOCK_24H	#NUM!		0	yes	5.55678	0.0234281	Guanylate-binding protein 5 (EC 3.6.5.-) (GTP-binding protein 5) (GBP-5) (MuGBP-5) (Guanine nucleotide-binding protein 5)
Q8CFD4	Snx8	SNX8_MOUSE	Q8CFD4_K196	TB_24H-MOCK_24H	0.744672	0.209715	0.386868	no	0.744672	0.386868	Sorting nexin-8
Q8CGA3	Slc43a2	LAT4_MOUSE	Q8CGA3_K283	TB_24H-MOCK_24H	-0.406954	0.556479	0.712723	no	-0.406954	0.712723	Large neutral amino acids transporter small subunit 4 (L-type amino acid transporter 4) (Solute carrier family 43 member 2)
Q8CGA3	Slc43a2	LAT4_MOUSE	Q8CGA3_K264	TB_24H-MOCK_24H	-0.688313	0.0632329	0.16594	no	-0.688313	0.16594	Large neutral amino acids transporter small subunit 4 (L-type amino acid transporter 4) (Solute carrier family 43 member 2)
Q8CGC7	Eprs	SYEP_MOUSE	Q8CGC7_K435	TB_24H-MOCK_24H	#NUM!		0	yes	4.81024	0.0340869	Bifunctional glutamate/proline--tRNA ligase (Bifunctional aminoacyl-tRNA synthetase) [Includes: Glutamate--tRNA ligase (EC 6.1.1.17) (Glutamyl-tRNA synthetase) (GluRS); Proline--tRNA ligase (EC 6.1.1.15) (Prolyl-tRNA synthetase) (ProRS)]
Q8CGE8	Ifi205a	IFI5A_MOUSE	Q8CGE8_K134	TB_24H-MOCK_24H	#NUM!		0	yes	5.37124	0.0227586	Interferon-activable protein 205-A (Ifi-205-A) (Interferon-inducible protein p205-A) (Protein D3')
Q8CGE8	Ifi205a	IFI5A_MOUSE	Q8CGE8_K121	TB_24H-MOCK_24H	#NUM!		0	yes	4.91155	0.0471867	Interferon-activable protein 205-A (Ifi-205-A) (Interferon-inducible protein p205-A) (Protein D3')
Q8CGP5	Hist1h2af	H2A1F_MOUSE	Q8CGP5_K120	TB_24H-MOCK_24H	-0.434436	0.341671	0.528611	no	-0.434436	0.528611	Histone H2A type 1-F
Q8CGP7	Hist1h2ak	H2A1K_MOUSE	Q8CGP7_K120	TB_24H-MOCK_24H	-0.798112	0.290389	0.479564	no	-0.798112	0.479564	Histone H2A type 1-K
Q8CGY8	Ogt	OGT1_MOUSE	Q8CGY8_K16	TB_24H-MOCK_24H	-0.871631	0.103725	0.235899	no	-0.871631	0.235899	UDP-N-acetylglucosamine--peptide N-acetylglucosaminyltransferase 110 kDa subunit (EC 2.4.1.255) (O-GlcNAc transferase subunit p110) (O-linked N-acetylglucosamine transferase 110 kDa subunit) (OGT)
Q8CHC4	Synj1	SYNJ1_MOUSE	Q8CHC4_K352	TB_24H-MOCK_24H	#NUM!		0	yes	5.29416	0.0245396	Synaptojanin-1 (EC 3.1.3.36) (Synaptic inositol 1,4,5-trisphosphate 5-phosphatase 1)
Q8CHC4	Synj1	SYNJ1_MOUSE	Q8CHC4_K451	TB_24H-MOCK_24H	#NUM!		0	yes	3.54989	0.0267062	Synaptojanin-1 (EC 3.1.3.36) (Synaptic inositol 1,4,5-trisphosphate 5-phosphatase 1)
Q8CHC4	Synj1	SYNJ1_MOUSE	Q8CHC4_K449	TB_24H-MOCK_24H	#NUM!		0	yes	3.29032	0.0168371	Synaptojanin-1 (EC 3.1.3.36) (Synaptic inositol 1,4,5-trisphosphate 5-phosphatase 1)
Q8CI59	Steap3	STEA3_MOUSE	Q8CI59_K62	TB_24H-MOCK_24H	-0.420176	0.391834	0.578128	no	-0.420176	0.578128	Metalloreductase STEAP3 (EC 1.16.1.-) (Dudulin-2) (Protein nm1054) (Six-transmembrane epithelial antigen of prostate 3) (Tumor suppressor-activated pathway protein 6)
Q8CIB6	Tmem230	TM230_MOUSE	Q8CIB6_K16	TB_24H-MOCK_24H	0.824356	0.000586494	0.00411321	no	0.824356	0.00411321	Transmembrane protein 230
Q8CIE6	Copa	COPA_MOUSE	Q8CIE6_K827	TB_24H-MOCK_24H	-0.0893118	0.926642	0.954899	no	-0.0893118	0.954899	Coatomer subunit alpha (Alpha-coat protein) (Alpha-COP) [Cleaved into: Xenin (Xenopsin-related peptide); Proxenin]
Q8CIE6	Copa	COPA_MOUSE	Q8CIE6_K4	TB_24H-MOCK_24H	2.81582	1.65769e-09	9.10014e-08	no	2.81582	9.10014e-08	Coatomer subunit alpha (Alpha-coat protein) (Alpha-COP) [Cleaved into: Xenin (Xenopsin-related peptide); Proxenin]
Q8CIE6	Copa	COPA_MOUSE	Q8CIE6_K271	TB_24H-MOCK_24H	0.85503	0.452439	0.632382	no	0.85503	0.632382	Coatomer subunit alpha (Alpha-coat protein) (Alpha-COP) [Cleaved into: Xenin (Xenopsin-related peptide); Proxenin]
Q8CIE6	Copa	COPA_MOUSE	Q8CIE6_K825	TB_24H-MOCK_24H	-1.09653	5.10284e-06	7.52197e-05	no	-1.09653	7.52197e-05	Coatomer subunit alpha (Alpha-coat protein) (Alpha-COP) [Cleaved into: Xenin (Xenopsin-related peptide); Proxenin]
Q8CIE6	Copa	COPA_MOUSE	Q8CIE6_K8	TB_24H-MOCK_24H	0.734921	0.0127537	0.0508871	no	0.734921	0.0508871	Coatomer subunit alpha (Alpha-coat protein) (Alpha-COP) [Cleaved into: Xenin (Xenopsin-related peptide); Proxenin]
Q8CIE6	Copa	COPA_MOUSE	Q8CIE6_K750	TB_24H-MOCK_24H	-0.643288	0.188645	0.360099	no	-0.643288	0.360099	Coatomer subunit alpha (Alpha-coat protein) (Alpha-COP) [Cleaved into: Xenin (Xenopsin-related peptide); Proxenin]
Q8CIH5	Plcg2	PLCG2_MOUSE	Q8CIH5_K980	TB_24H-MOCK_24H	#NUM!		0	yes	4.77424	0.0335517	1-phosphatidylinositol 4,5-bisphosphate phosphodiesterase gamma-2 (EC 3.1.4.11) (Phosphoinositide phospholipase C-gamma-2) (Phospholipase C-gamma-2) (PLC-gamma-2)
Q8CIH5	Plcg2	PLCG2_MOUSE	Q8CIH5_K962	TB_24H-MOCK_24H	0.940959	0.000449526	0.00335984	no	0.940959	0.00335984	1-phosphatidylinositol 4,5-bisphosphate phosphodiesterase gamma-2 (EC 3.1.4.11) (Phosphoinositide phospholipase C-gamma-2) (Phospholipase C-gamma-2) (PLC-gamma-2)
Q8JZK9	Hmgcs1	HMCS1_MOUSE	Q8JZK9_K330	TB_24H-MOCK_24H	1.35233	0.0044239	0.0220516	no	1.35233	0.0220516	Hydroxymethylglutaryl-CoA synthase, cytoplasmic (HMG-CoA synthase) (EC 2.3.3.10) (3-hydroxy-3-methylglutaryl coenzyme A synthase)
Q8K021	Scamp1	SCAM1_MOUSE	Q8K021_K334	TB_24H-MOCK_24H	1.28674	0.204016	0.378989	no	1.28674	0.378989	Secretory carrier-associated membrane protein 1 (Secretory carrier membrane protein 1)
Q8K0B2	Lmbrd1	LMBD1_MOUSE	Q8K0B2_K253	TB_24H-MOCK_24H	0.175363	0.755406	0.853517	no	0.175363	0.853517	Probable lysosomal cobalamin transporter (LMBR1 domain-containing protein 1) (Protein N90b)
Q8K0B2	Lmbrd1	LMBD1_MOUSE	Q8K0B2_K267	TB_24H-MOCK_24H	-0.0192623	0.947984	0.967415	no	-0.0192623	0.967415	Probable lysosomal cobalamin transporter (LMBR1 domain-containing protein 1) (Protein N90b)
Q8K124	Plekho2	PKHO2_MOUSE	Q8K124_K482	TB_24H-MOCK_24H	-0.759736	0.164813	0.329626	no	-0.759736	0.329626	Pleckstrin homology domain-containing family O member 2 (PH domain-containing family O member 2) (Pleckstrin homology domain-containing family Q member 1) (PH domain-containing family Q member 1)
Q8K183	Pdxk	PDXK_MOUSE	Q8K183_K258	TB_24H-MOCK_24H	0.693461	0.0882248	0.209348	no	0.693461	0.209348	Pyridoxal kinase (EC 2.7.1.35) (Pyridoxine kinase)
Q8K1B8	Fermt3	URP2_MOUSE	Q8K1B8_K222	TB_24H-MOCK_24H	1.8269	0.0209264	0.0722666	no	1.8269	0.0722666	Fermitin family homolog 3 (Kindlin-3) (Unc-112-related protein 2)
Q8K1B8	Fermt3	URP2_MOUSE	Q8K1B8_K118	TB_24H-MOCK_24H	1.18521	0.00109762	0.00707451	no	1.18521	0.00707451	Fermitin family homolog 3 (Kindlin-3) (Unc-112-related protein 2)
Q8K1R7	Nek9	NEK9_MOUSE	Q8K1R7_K366	TB_24H-MOCK_24H	-2.27833	0.00765724	0.033862	no	-2.27833	0.033862	Serine/threonine-protein kinase Nek9 (EC 2.7.11.1) (Nercc1 kinase) (Never in mitosis A-related kinase 9) (NimA-related protein kinase 9)
Q8K1X4	Q8K1X4		Q8K1X4_K638	TB_24H-MOCK_24H	0.215677	0.581281	0.729235	no	0.215677	0.729235
Q8K1X4	Q8K1X4		Q8K1X4_K630	TB_24H-MOCK_24H	0.705366	0.179649	0.350063	no	0.705366	0.350063
Q8K310	Matr3	MATR3_MOUSE	Q8K310_K522	TB_24H-MOCK_24H	#NUM!		0	yes	-2.99286	0.0466638	Matrin-3
Q8K3V7	Kiaa1024	K1024_MOUSE	Q8K3V7_K261	TB_24H-MOCK_24H	-2.06444	0.0307949	0.0976603	no	-2.06444	0.0976603	UPF0258 protein KIAA1024 (Protein DD1)
Q8N7N5	Dcaf8	DCAF8_MOUSE	Q8N7N5_K268	TB_24H-MOCK_24H	-0.14996	0.817326	0.894224	no	-0.14996	0.894224	DDB1- and CUL4-associated factor 8 (WD repeat-containing protein 42A)
Q8R010	Aimp2	AIMP2_MOUSE	Q8R010_K70	TB_24H-MOCK_24H	0.578127	0.146236	0.30281	no	0.578127	0.30281	Aminoacyl tRNA synthase complex-interacting multifunctional protein 2 (Multisynthase complex auxiliary component p38) (Protein JTV-1)
Q8R081	Hnrnpl	HNRPL_MOUSE	Q8R081_K530	TB_24H-MOCK_24H	-0.923669	0.00329849	0.0177405	no	-0.923669	0.0177405	Heterogeneous nuclear ribonucleoprotein L (hnRNP L)
Q8R081	Hnrnpl	HNRPL_MOUSE	Q8R081_K266	TB_24H-MOCK_24H	#NUM!		0	yes	-5.28389	0.0191841	Heterogeneous nuclear ribonucleoprotein L (hnRNP L)
Q8R0H9	Gga1	GGA1_MOUSE	Q8R0H9_K183	TB_24H-MOCK_24H	-0.332602	0.520748	0.682749	no	-0.332602	0.682749	ADP-ribosylation factor-binding protein GGA1 (Gamma-adaptin-related protein 1) (Golgi-localized, gamma ear-containing, ARF-binding protein 1)
Q8R0X7	Sgpl1	SGPL1_MOUSE	Q8R0X7_K353	TB_24H-MOCK_24H	0.569747	0.159536	0.322311	no	0.569747	0.322311	Sphingosine-1-phosphate lyase 1 (S1PL) (SP-lyase 1) (SPL 1) (mSPL) (EC 4.1.2.27) (Sphingosine-1-phosphate aldolase)
Q8R0X7	Sgpl1	SGPL1_MOUSE	Q8R0X7_K107	TB_24H-MOCK_24H	-0.662093	0.201341	0.376453	no	-0.662093	0.376453	Sphingosine-1-phosphate lyase 1 (S1PL) (SP-lyase 1) (SPL 1) (mSPL) (EC 4.1.2.27) (Sphingosine-1-phosphate aldolase)
Q8R151	Znfx1	ZNFX1_MOUSE	Q8R151_K431	TB_24H-MOCK_24H	#NUM!		0	yes	5.69469	0.0290638	NFX1-type zinc finger-containing protein 1
Q8R151	Znfx1	ZNFX1_MOUSE	Q8R151_K969	TB_24H-MOCK_24H	0.348786	0.437373	0.620103	no	0.348786	0.620103	NFX1-type zinc finger-containing protein 1
Q8R151	Znfx1	ZNFX1_MOUSE	Q8R151_K1200	TB_24H-MOCK_24H	#NUM!		0	yes	5.68825	0.0432167	NFX1-type zinc finger-containing protein 1
Q8R151	Znfx1	ZNFX1_MOUSE	Q8R151_K683	TB_24H-MOCK_24H	3.43775	8.84597e-08	2.87404e-06	no	3.43775	2.87404e-06	NFX1-type zinc finger-containing protein 1
Q8R151	Znfx1	ZNFX1_MOUSE	Q8R151_K1054	TB_24H-MOCK_24H	#NUM!		0	yes	5.47532	0.0301027	NFX1-type zinc finger-containing protein 1
Q8R151	Znfx1	ZNFX1_MOUSE	Q8R151_K1167	TB_24H-MOCK_24H	2.27977	1.45374e-05	0.000180809	no	2.27977	0.000180809	NFX1-type zinc finger-containing protein 1
Q8R1F1	Fam129b	NIBL1_MOUSE	Q8R1F1_K408	TB_24H-MOCK_24H	0.49719	0.36514	0.550998	no	0.49719	0.550998	Niban-like protein 1 (Protein FAM129B)
Q8R1F1	Fam129b	NIBL1_MOUSE	Q8R1F1_K430	TB_24H-MOCK_24H	1.50691	7.60154e-09	3.27072e-07	no	1.50691	3.27072e-07	Niban-like protein 1 (Protein FAM129B)
Q8R1F1	Fam129b	NIBL1_MOUSE	Q8R1F1_K330	TB_24H-MOCK_24H	-0.64324	0.00563625	0.0262366	no	-0.64324	0.0262366	Niban-like protein 1 (Protein FAM129B)
Q8R1F1	Fam129b	NIBL1_MOUSE	Q8R1F1_K316	TB_24H-MOCK_24H	1.68244	2.57066e-05	0.000278401	no	1.68244	0.000278401	Niban-like protein 1 (Protein FAM129B)
Q8R1F1	Fam129b	NIBL1_MOUSE	Q8R1F1_K401	TB_24H-MOCK_24H	1.76019	3.22648e-06	5.25594e-05	no	1.76019	5.25594e-05	Niban-like protein 1 (Protein FAM129B)
Q8R1M2	H2afj	H2AJ_MOUSE	Q8R1M2_K120	TB_24H-MOCK_24H	-1.28138	0.291924	0.480866	no	-1.28138	0.480866	Histone H2A.J (H2a/j)
Q8R1X6	Spg20	SPG20_MOUSE	Q8R1X6_K382	TB_24H-MOCK_24H	0.209059	0.581065	0.729235	no	0.209059	0.729235	Spartin
Q8R1X6	Spg20	SPG20_MOUSE	Q8R1X6_K485	TB_24H-MOCK_24H	-0.767283	0.00821038	0.0357129	no	-0.767283	0.0357129	Spartin
Q8R1X6	Spg20	SPG20_MOUSE	Q8R1X6_K530	TB_24H-MOCK_24H	0.1368	0.919722	0.951395	no	0.1368	0.951395	Spartin
Q8R1X6	Spg20	SPG20_MOUSE	Q8R1X6_K451	TB_24H-MOCK_24H	-0.081321	0.834595	0.901995	no	-0.081321	0.901995	Spartin
Q8R2V5	Adap2	ADAP2_MOUSE	Q8R2V5_K264	TB_24H-MOCK_24H	1.22796	0.000876176	0.00581197	no	1.22796	0.00581197	Arf-GAP with dual PH domain-containing protein 2 (Centaurin-alpha-2) (Cnt-a2)
Q8R2V5	Adap2	ADAP2_MOUSE	Q8R2V5_K258	TB_24H-MOCK_24H	#NUM!		0	yes	5.14437	0.0372273	Arf-GAP with dual PH domain-containing protein 2 (Centaurin-alpha-2) (Cnt-a2)
Q8R2V5	Adap2	ADAP2_MOUSE	Q8R2V5_K268	TB_24H-MOCK_24H	#NUM!		0	yes	5.15558	0.0460071	Arf-GAP with dual PH domain-containing protein 2 (Centaurin-alpha-2) (Cnt-a2)
Q8R5A3	Apbb1ip	AB1IP_MOUSE	Q8R5A3_K257	TB_24H-MOCK_24H	1.23678	0.0693581	0.176952	no	1.23678	0.176952	Amyloid beta A4 precursor protein-binding family B member 1-interacting protein (APBB1-interacting protein 1) (Proline-rich EVH1 ligand 1) (PREL-1) (Proline-rich protein 48)
Q8R5A3	Apbb1ip	AB1IP_MOUSE	Q8R5A3_K271	TB_24H-MOCK_24H	0.55446	0.401494	0.58748	no	0.55446	0.58748	Amyloid beta A4 precursor protein-binding family B member 1-interacting protein (APBB1-interacting protein 1) (Proline-rich EVH1 ligand 1) (PREL-1) (Proline-rich protein 48)
Q8R5F7	Ifih1	IFIH1_MOUSE	Q8R5F7_K992	TB_24H-MOCK_24H	#NUM!		0	yes	2.56901	0.0162171	Interferon-induced helicase C domain-containing protein 1 (EC 3.6.4.13) (Helicase with 2 CARD domains) (Helicard) (Interferon induced with helicase C domain protein 1) (Melanoma differentiation-associated protein 5) (MDA-5) (RIG-I-like receptor 2) (RLR-2)
Q8R5F7	Ifih1	IFIH1_MOUSE	Q8R5F7_K336	TB_24H-MOCK_24H	#NUM!		0	yes	3.58925	0.0456249	Interferon-induced helicase C domain-containing protein 1 (EC 3.6.4.13) (Helicase with 2 CARD domains) (Helicard) (Interferon induced with helicase C domain protein 1) (Melanoma differentiation-associated protein 5) (MDA-5) (RIG-I-like receptor 2) (RLR-2)
Q8R5F7	Ifih1	IFIH1_MOUSE	Q8R5F7_K983	TB_24H-MOCK_24H	#NUM!		0	yes	5.35027	0.0168222	Interferon-induced helicase C domain-containing protein 1 (EC 3.6.4.13) (Helicase with 2 CARD domains) (Helicard) (Interferon induced with helicase C domain protein 1) (Melanoma differentiation-associated protein 5) (MDA-5) (RIG-I-like receptor 2) (RLR-2)
Q8R5F7	Ifih1	IFIH1_MOUSE	Q8R5F7_K726	TB_24H-MOCK_24H	3.72446	6.39488e-14	1.01807e-10	no	3.72446	1.01807e-10	Interferon-induced helicase C domain-containing protein 1 (EC 3.6.4.13) (Helicase with 2 CARD domains) (Helicard) (Interferon induced with helicase C domain protein 1) (Melanoma differentiation-associated protein 5) (MDA-5) (RIG-I-like receptor 2) (RLR-2)
Q8VC03	Eml3	EMAL3_MOUSE	Q8VC03_K578	TB_24H-MOCK_24H	-0.406133	0.429763	0.613067	no	-0.406133	0.613067	Echinoderm microtubule-associated protein-like 3 (EMAP-3)
Q8VC04	Tmem106a	T106A_MOUSE	Q8VC04_K3	TB_24H-MOCK_24H	-0.825984	0.204412	0.379282	no	-0.825984	0.379282	Transmembrane protein 106A
Q8VCH8	Ubxn4	UBXN4_MOUSE	Q8VCH8_K299	TB_24H-MOCK_24H	-0.364783	0.259779	0.447585	no	-0.364783	0.447585	UBX domain-containing protein 4 (Erasin) (UBX domain-containing protein 2)
Q8VCW4	Unc93b1	UN93B_MOUSE	Q8VCW4_K535	TB_24H-MOCK_24H	1.0162	0.252	0.439895	no	1.0162	0.439895	Protein unc-93 homolog B1 (Unc-93B1)
Q8VD75	Hip1	HIP1_MOUSE	Q8VD75_K155	TB_24H-MOCK_24H	-0.957761	0.114469	0.251357	no	-0.957761	0.251357	Huntingtin-interacting protein 1 (HIP-1) (Huntingtin-interacting protein I) (HIP-I)
Q8VD75	Hip1	HIP1_MOUSE	Q8VD75_K56	TB_24H-MOCK_24H	0.12513	0.574058	0.725259	no	0.12513	0.725259	Huntingtin-interacting protein 1 (HIP-1) (Huntingtin-interacting protein I) (HIP-I)
Q8VD75	Hip1	HIP1_MOUSE	Q8VD75_K406	TB_24H-MOCK_24H	0.715522	0.0590554	0.157745	no	0.715522	0.157745	Huntingtin-interacting protein 1 (HIP-1) (Huntingtin-interacting protein I) (HIP-I)
Q8VDD5	Myh9	MYH9_MOUSE	Q8VDD5_K199	TB_24H-MOCK_24H	0.522698	0.334469	0.522789	no	0.522698	0.522789	Myosin-9 (Cellular myosin heavy chain, type A) (Myosin heavy chain 9) (Myosin heavy chain, non-muscle IIa) (Non-muscle myosin heavy chain A) (NMMHC-A) (Non-muscle myosin heavy chain IIa) (NMMHC II-a) (NMMHC-IIA)
Q8VDD5	Myh9	MYH9_MOUSE	Q8VDD5_K355	TB_24H-MOCK_24H	0.128499	0.848485	0.911994	no	0.128499	0.911994	Myosin-9 (Cellular myosin heavy chain, type A) (Myosin heavy chain 9) (Myosin heavy chain, non-muscle IIa) (Non-muscle myosin heavy chain A) (NMMHC-A) (Non-muscle myosin heavy chain IIa) (NMMHC II-a) (NMMHC-IIA)
Q8VDD5	Myh9	MYH9_MOUSE	Q8VDD5_K555	TB_24H-MOCK_24H	1.24133	0.0181108	0.0646465	no	1.24133	0.0646465	Myosin-9 (Cellular myosin heavy chain, type A) (Myosin heavy chain 9) (Myosin heavy chain, non-muscle IIa) (Non-muscle myosin heavy chain A) (NMMHC-A) (Non-muscle myosin heavy chain IIa) (NMMHC II-a) (NMMHC-IIA)
Q8VDD5	Myh9	MYH9_MOUSE	Q8VDD5_K640	TB_24H-MOCK_24H	-0.139917	0.822103	0.895817	no	-0.139917	0.895817	Myosin-9 (Cellular myosin heavy chain, type A) (Myosin heavy chain 9) (Myosin heavy chain, non-muscle IIa) (Non-muscle myosin heavy chain A) (NMMHC-A) (Non-muscle myosin heavy chain IIa) (NMMHC II-a) (NMMHC-IIA)
Q8VDD5	Myh9	MYH9_MOUSE	Q8VDD5_K66	TB_24H-MOCK_24H	0.347745	0.328369	0.518873	no	0.347745	0.518873	Myosin-9 (Cellular myosin heavy chain, type A) (Myosin heavy chain 9) (Myosin heavy chain, non-muscle IIa) (Non-muscle myosin heavy chain A) (NMMHC-A) (Non-muscle myosin heavy chain IIa) (NMMHC II-a) (NMMHC-IIA)
Q8VDD5	Myh9	MYH9_MOUSE	Q8VDD5_K1415	TB_24H-MOCK_24H	#NUM!		0	yes	4.86649	0.0404503	Myosin-9 (Cellular myosin heavy chain, type A) (Myosin heavy chain 9) (Myosin heavy chain, non-muscle IIa) (Non-muscle myosin heavy chain A) (NMMHC-A) (Non-muscle myosin heavy chain IIa) (NMMHC II-a) (NMMHC-IIA)
Q8VDD5	Myh9	MYH9_MOUSE	Q8VDD5_K651	TB_24H-MOCK_24H	1.21343	5.07796e-10	3.6746e-08	no	1.21343	3.6746e-08	Myosin-9 (Cellular myosin heavy chain, type A) (Myosin heavy chain 9) (Myosin heavy chain, non-muscle IIa) (Non-muscle myosin heavy chain A) (NMMHC-A) (Non-muscle myosin heavy chain IIa) (NMMHC II-a) (NMMHC-IIA)
Q8VDD5	Myh9	MYH9_MOUSE	Q8VDD5_K299	TB_24H-MOCK_24H	1.20246	0.00605012	0.0277573	no	1.20246	0.0277573	Myosin-9 (Cellular myosin heavy chain, type A) (Myosin heavy chain 9) (Myosin heavy chain, non-muscle IIa) (Non-muscle myosin heavy chain A) (NMMHC-A) (Non-muscle myosin heavy chain IIa) (NMMHC II-a) (NMMHC-IIA)
Q8VDD5	Myh9	MYH9_MOUSE	Q8VDD5_K102	TB_24H-MOCK_24H	#NUM!		0	yes	3.29516	0.0427051	Myosin-9 (Cellular myosin heavy chain, type A) (Myosin heavy chain 9) (Myosin heavy chain, non-muscle IIa) (Non-muscle myosin heavy chain A) (NMMHC-A) (Non-muscle myosin heavy chain IIa) (NMMHC II-a) (NMMHC-IIA)
Q8VDD5	Myh9	MYH9_MOUSE	Q8VDD5_K760	TB_24H-MOCK_24H	1.50247	3.92269e-05	0.000413571	no	1.50247	0.000413571	Myosin-9 (Cellular myosin heavy chain, type A) (Myosin heavy chain 9) (Myosin heavy chain, non-muscle IIa) (Non-muscle myosin heavy chain A) (NMMHC-A) (Non-muscle myosin heavy chain IIa) (NMMHC II-a) (NMMHC-IIA)
Q8VDD5	Myh9	MYH9_MOUSE	Q8VDD5_K558	TB_24H-MOCK_24H	0.964267	0.00554716	0.0260504	no	0.964267	0.0260504	Myosin-9 (Cellular myosin heavy chain, type A) (Myosin heavy chain 9) (Myosin heavy chain, non-muscle IIa) (Non-muscle myosin heavy chain A) (NMMHC-A) (Non-muscle myosin heavy chain IIa) (NMMHC II-a) (NMMHC-IIA)
Q8VDD5	Myh9	MYH9_MOUSE	Q8VDD5_K356	TB_24H-MOCK_24H	0.484054	0.268293	0.456815	no	0.484054	0.456815	Myosin-9 (Cellular myosin heavy chain, type A) (Myosin heavy chain 9) (Myosin heavy chain, non-muscle IIa) (Non-muscle myosin heavy chain A) (NMMHC-A) (Non-muscle myosin heavy chain IIa) (NMMHC II-a) (NMMHC-IIA)
Q8VDI1	Epsti1	ESIP1_MOUSE	Q8VDI1_K6	TB_24H-MOCK_24H	0.53022	0.109132	0.241807	no	0.53022	0.241807	Epithelial-stromal interaction protein 1
Q8VDN2	Atp1a1	AT1A1_MOUSE	Q8VDN2_K840	TB_24H-MOCK_24H	-0.480945	0.201468	0.376453	no	-0.480945	0.376453	Sodium/potassium-transporting ATPase subunit alpha-1 (Na(+)/K(+) ATPase alpha-1 subunit) (EC 3.6.3.9) (Sodium pump subunit alpha-1)
Q8VDN2	Atp1a1	AT1A1_MOUSE	Q8VDN2_K444	TB_24H-MOCK_24H	0.165028	0.650233	0.780604	no	0.165028	0.780604	Sodium/potassium-transporting ATPase subunit alpha-1 (Na(+)/K(+) ATPase alpha-1 subunit) (EC 3.6.3.9) (Sodium pump subunit alpha-1)
Q8VDP4	Ccar2	CCAR2_MOUSE	Q8VDP4_K344	TB_24H-MOCK_24H	1.02199	0.00563073	0.0262366	no	1.02199	0.0262366	Cell cycle and apoptosis regulator protein 2 (Cell division cycle and apoptosis regulator protein 2)
Q8VEK3	Hnrnpu	HNRPU_MOUSE	Q8VEK3_K176	TB_24H-MOCK_24H	-1.18827	0.0792883	0.193008	no	-1.18827	0.193008	Heterogeneous nuclear ribonucleoprotein U (hnRNP U) (Scaffold attachment factor A) (SAF-A)
Q8VEK3	Hnrnpu	HNRPU_MOUSE	Q8VEK3_K541	TB_24H-MOCK_24H	-0.271466	0.390479	0.57801	no	-0.271466	0.57801	Heterogeneous nuclear ribonucleoprotein U (hnRNP U) (Scaffold attachment factor A) (SAF-A)
Q8VEK3	Hnrnpu	HNRPU_MOUSE	Q8VEK3_K9	TB_24H-MOCK_24H	-0.459574	0.085813	0.205994	no	-0.459574	0.205994	Heterogeneous nuclear ribonucleoprotein U (hnRNP U) (Scaffold attachment factor A) (SAF-A)
Q8VEK3	Hnrnpu	HNRPU_MOUSE	Q8VEK3_K181	TB_24H-MOCK_24H	0.529684	0.483543	0.662479	no	0.529684	0.662479	Heterogeneous nuclear ribonucleoprotein U (hnRNP U) (Scaffold attachment factor A) (SAF-A)
Q8VEK3	Hnrnpu	HNRPU_MOUSE	Q8VEK3_K10	TB_24H-MOCK_24H	0.0960263	0.897287	0.937945	no	0.0960263	0.937945	Heterogeneous nuclear ribonucleoprotein U (hnRNP U) (Scaffold attachment factor A) (SAF-A)
Q8VI59	Pcnx3	PCX3_MOUSE	Q8VI59_K1762,Q9QYC1_K1977	TB_24H-MOCK_24H	-0.175604	0.520706	0.682749	no	-0.175604	0.682749	Pecanex-like protein 3 (Pecanex homolog protein 3)
Q8VI93	Oas3	OAS3_MOUSE	Q8VI93_K188	TB_24H-MOCK_24H	3.35703	4.73441e-11	4.59404e-09	no	3.35703	4.59404e-09	2'-5'-oligoadenylate synthase 3 ((2-5')oligo(A) synthase 3) (2-5A synthase 3) (EC 2.7.7.84) (2',5'-oligoadenylate synthetase-like 10)
Q8VI93	Oas3	OAS3_MOUSE	Q8VI93_K852	TB_24H-MOCK_24H	2.12705	0.00420993	0.0212095	no	2.12705	0.0212095	2'-5'-oligoadenylate synthase 3 ((2-5')oligo(A) synthase 3) (2-5A synthase 3) (EC 2.7.7.84) (2',5'-oligoadenylate synthetase-like 10)
Q8VI93	Oas3	OAS3_MOUSE	Q8VI93_K992	TB_24H-MOCK_24H	2.88909	1.96671e-10	1.58062e-08	no	2.88909	1.58062e-08	2'-5'-oligoadenylate synthase 3 ((2-5')oligo(A) synthase 3) (2-5A synthase 3) (EC 2.7.7.84) (2',5'-oligoadenylate synthetase-like 10)
Q8VI93	Oas3	OAS3_MOUSE	Q8VI93_K1130	TB_24H-MOCK_24H	#NUM!		0	yes	7.90539	0.0208345	2'-5'-oligoadenylate synthase 3 ((2-5')oligo(A) synthase 3) (2-5A synthase 3) (EC 2.7.7.84) (2',5'-oligoadenylate synthetase-like 10)
Q8VI93	Oas3	OAS3_MOUSE	Q8VI93_K539	TB_24H-MOCK_24H	#NUM!		0	yes	3.79116	0.0296442	2'-5'-oligoadenylate synthase 3 ((2-5')oligo(A) synthase 3) (2-5A synthase 3) (EC 2.7.7.84) (2',5'-oligoadenylate synthetase-like 10)
Q8VI93	Oas3	OAS3_MOUSE	Q8VI93_K1084	TB_24H-MOCK_24H	0.77966	0.519453	0.682749	no	0.77966	0.682749	2'-5'-oligoadenylate synthase 3 ((2-5')oligo(A) synthase 3) (2-5A synthase 3) (EC 2.7.7.84) (2',5'-oligoadenylate synthetase-like 10)
Q8VI93	Oas3	OAS3_MOUSE	Q8VI93_K858	TB_24H-MOCK_24H	1.73698	8.14134e-07	1.77548e-05	no	1.73698	1.77548e-05	2'-5'-oligoadenylate synthase 3 ((2-5')oligo(A) synthase 3) (2-5A synthase 3) (EC 2.7.7.84) (2',5'-oligoadenylate synthetase-like 10)
Q8VI93	Oas3	OAS3_MOUSE	Q8VI93_K836	TB_24H-MOCK_24H	0.766215	0.0139894	0.053817	no	0.766215	0.053817	2'-5'-oligoadenylate synthase 3 ((2-5')oligo(A) synthase 3) (2-5A synthase 3) (EC 2.7.7.84) (2',5'-oligoadenylate synthetase-like 10)
Q8VI93	Oas3	OAS3_MOUSE	Q8VI93_K510	TB_24H-MOCK_24H	1.58784	0.312934	0.502716	no	1.58784	0.502716	2'-5'-oligoadenylate synthase 3 ((2-5')oligo(A) synthase 3) (2-5A synthase 3) (EC 2.7.7.84) (2',5'-oligoadenylate synthetase-like 10)
Q91V92	Acly	ACLY_MOUSE	Q91V92_K4	TB_24H-MOCK_24H	1.21562	0.0125914	0.0504926	no	1.21562	0.0504926	ATP-citrate synthase (EC 2.3.3.8) (ATP-citrate (pro-S-)-lyase) (Citrate cleavage enzyme)
Q91V92	Acly	ACLY_MOUSE	Q91V92_K272	TB_24H-MOCK_24H	#NUM!		0	yes	-2.32817	0.0376886	ATP-citrate synthase (EC 2.3.3.8) (ATP-citrate (pro-S-)-lyase) (Citrate cleavage enzyme)
Q91V92	Acly	ACLY_MOUSE	Q91V92_K981	TB_24H-MOCK_24H	2.79548	9.07498e-06	0.000118421	no	2.79548	0.000118421	ATP-citrate synthase (EC 2.3.3.8) (ATP-citrate (pro-S-)-lyase) (Citrate cleavage enzyme)
Q91V92	Acly	ACLY_MOUSE	Q91V92_K620	TB_24H-MOCK_24H	-0.0124612	0.9724	0.984146	no	-0.0124612	0.984146	ATP-citrate synthase (EC 2.3.3.8) (ATP-citrate (pro-S-)-lyase) (Citrate cleavage enzyme)
Q91VI7	Rnh1	RINI_MOUSE	Q91VI7_K334	TB_24H-MOCK_24H	0.871738	0.00885822	0.0379094	no	0.871738	0.0379094	Ribonuclease inhibitor (Ribonuclease/angiogenin inhibitor 1)
Q91VI7	Rnh1	RINI_MOUSE	Q91VI7_K84	TB_24H-MOCK_24H	0.14543	0.764314	0.860391	no	0.14543	0.860391	Ribonuclease inhibitor (Ribonuclease/angiogenin inhibitor 1)
Q91VI7	Rnh1	RINI_MOUSE	Q91VI7_K168	TB_24H-MOCK_24H	0.92176	0.174496	0.34381	no	0.92176	0.34381	Ribonuclease inhibitor (Ribonuclease/angiogenin inhibitor 1)
Q91VI7	Rnh1	RINI_MOUSE	Q91VI7_K282	TB_24H-MOCK_24H	-0.0212199	0.970293	0.983543	no	-0.0212199	0.983543	Ribonuclease inhibitor (Ribonuclease/angiogenin inhibitor 1)
Q91VW3	Sh3bgrl3	SH3L3_MOUSE	Q91VW3_K18	TB_24H-MOCK_24H	-1.14065	0.00497562	0.0241544	no	-1.14065	0.0241544	SH3 domain-binding glutamic acid-rich-like protein 3
Q91WC9	Daglb	DGLB_MOUSE	Q91WC9_K585	TB_24H-MOCK_24H	-0.00269742	0.996563	0.996982	no	-0.00269742	0.996982	Sn1-specific diacylglycerol lipase beta (DGL-beta) (EC 3.1.1.-)
Q91WQ3	Yars	SYYC_MOUSE	Q91WQ3_K513	TB_24H-MOCK_24H	0.0389386	0.918333	0.950889	no	0.0389386	0.950889	Tyrosine--tRNA ligase, cytoplasmic (EC 6.1.1.1) (Tyrosyl-tRNA synthetase) (TyrRS) [Cleaved into: Tyrosine--tRNA ligase, cytoplasmic, N-terminally processed]
Q91WQ3	Yars	SYYC_MOUSE	Q91WQ3_K206	TB_24H-MOCK_24H	0.0334114	0.971154	0.983543	no	0.0334114	0.983543	Tyrosine--tRNA ligase, cytoplasmic (EC 6.1.1.1) (Tyrosyl-tRNA synthetase) (TyrRS) [Cleaved into: Tyrosine--tRNA ligase, cytoplasmic, N-terminally processed]
Q91YQ5	Rpn1	RPN1_MOUSE	Q91YQ5_K539	TB_24H-MOCK_24H	-0.663756	0.0931567	0.217457	no	-0.663756	0.217457	Dolichyl-diphosphooligosaccharide--protein glycosyltransferase subunit 1 (EC 2.4.99.18) (Dolichyl-diphosphooligosaccharide--protein glycosyltransferase 67 kDa subunit) (Ribophorin I) (RPN-I) (Ribophorin-1)
Q91YT2	Rnf185	RN185_MOUSE	Q91YT2_K80	TB_24H-MOCK_24H	0.343875	0.257091	0.444551	no	0.343875	0.444551	E3 ubiquitin-protein ligase RNF185 (EC 6.3.2.-) (RING finger protein 185)
Q91YX0	Themis2	THMS2_MOUSE	Q91YX0_K151	TB_24H-MOCK_24H	#NUM!		0	yes	5.085	0.0134895	Protein THEMIS2 (Induced by contact to basement membrane 1 protein) (Protein ICB-1) (Thymocyte-expressed molecule involved in selection protein 2)
Q91YX0	Themis2	THMS2_MOUSE	Q91YX0_K153	TB_24H-MOCK_24H	1.27378	0.0143248	0.0546885	no	1.27378	0.0546885	Protein THEMIS2 (Induced by contact to basement membrane 1 protein) (Protein ICB-1) (Thymocyte-expressed molecule involved in selection protein 2)
Q920E5	Fdps	FPPS_MOUSE	Q920E5_K57	TB_24H-MOCK_24H	-1.68437	0.00158514	0.0096468	no	-1.68437	0.0096468	Farnesyl pyrophosphate synthase (FPP synthase) (FPS) (EC 2.5.1.10) ((2E,6E)-farnesyl diphosphate synthase) (Cholesterol-regulated 39 kDa protein) (CR 39) (Dimethylallyltranstransferase) (EC 2.5.1.1) (Farnesyl diphosphate synthase) (Geranyltranstransferase)
Q921W0	Chmp1a	CHM1A_MOUSE	Q921W0_K83	TB_24H-MOCK_24H	-0.68437	0.0860762	0.206065	no	-0.68437	0.206065	Charged multivesicular body protein 1a (Chromatin-modifying protein 1a) (CHMP1a)
Q922B2	Dars	SYDC_MOUSE	Q922B2_K330	TB_24H-MOCK_24H	0.62481	0.440908	0.622274	no	0.62481	0.622274	Aspartate--tRNA ligase, cytoplasmic (EC 6.1.1.12) (Aspartyl-tRNA synthetase) (AspRS)
Q922H4	Gmppa	GMPPA_MOUSE	Q922H4_K13	TB_24H-MOCK_24H	1.06123	0.00103268	0.00673781	no	1.06123	0.00673781	Mannose-1-phosphate guanyltransferase alpha (GDP-mannose pyrophosphorylase A) (GTP-mannose-1-phosphate guanylyltransferase alpha)
Q922H9	Znf330	ZN330_MOUSE	Q922H9_K78	TB_24H-MOCK_24H	#NUM!		0	yes	-3.26992	0.0487483	Zinc finger protein 330 (Nucleolar autoantigen 36) (Nucleolar cysteine-rich protein)
Q922H9	Znf330	ZN330_MOUSE	Q922H9_K201	TB_24H-MOCK_24H	-0.63632	0.490459	0.666789	no	-0.63632	0.666789	Zinc finger protein 330 (Nucleolar autoantigen 36) (Nucleolar cysteine-rich protein)
Q922H9	Znf330	ZN330_MOUSE	Q922H9_K72	TB_24H-MOCK_24H	-0.495407	0.655917	0.783948	no	-0.495407	0.783948	Zinc finger protein 330 (Nucleolar autoantigen 36) (Nucleolar cysteine-rich protein)
Q922M3	Kctd10	BACD3_MOUSE	Q922M3_K32	TB_24H-MOCK_24H	-0.822429	0.210143	0.387208	no	-0.822429	0.387208	BTB/POZ domain-containing adapter for CUL3-mediated RhoA degradation protein 3 (mBACURD3) (BTB/POZ domain-containing protein KCTD10)
Q922M3	Kctd10	BACD3_MOUSE	Q922M3_K35	TB_24H-MOCK_24H	#NUM!		0	yes	4.39345	0.0346463	BTB/POZ domain-containing adapter for CUL3-mediated RhoA degradation protein 3 (mBACURD3) (BTB/POZ domain-containing protein KCTD10)
Q922M3	Kctd10	BACD3_MOUSE	Q922M3_K25	TB_24H-MOCK_24H	0.285723	0.485269	0.663297	no	0.285723	0.663297	BTB/POZ domain-containing adapter for CUL3-mediated RhoA degradation protein 3 (mBACURD3) (BTB/POZ domain-containing protein KCTD10)
Q922Q8	Lrrc59	LRC59_MOUSE	Q922Q8_K135	TB_24H-MOCK_24H	0.339031	0.78489	0.868574	no	0.339031	0.868574	Leucine-rich repeat-containing protein 59
Q922T2	Mfap3	MFAP3_MOUSE	Q922T2_K212,Q9D3X9_K221	TB_24H-MOCK_24H	-1.28672	2.4156e-06	4.32093e-05	no	-1.28672	4.32093e-05	Microfibril-associated glycoprotein 3
Q922Y1	Ubxn1	UBXN1_MOUSE	Q922Y1_K105	TB_24H-MOCK_24H	0.027707	0.948997	0.967415	no	0.027707	0.967415	UBX domain-containing protein 1 (Protein 2B28) (SAPK substrate protein 1) (UBA/UBX 33.3 kDa protein) (mY33K)
Q922Y1	Ubxn1	UBXN1_MOUSE	Q922Y1_K208	TB_24H-MOCK_24H	#NUM!		0	yes	5.19762	0.040419	UBX domain-containing protein 1 (Protein 2B28) (SAPK substrate protein 1) (UBA/UBX 33.3 kDa protein) (mY33K)
Q924C5	Alpk3	ALPK3_MOUSE	Q924C5_K1195	TB_24H-MOCK_24H	#NUM!		0	yes	4.02235	0.0346198	Alpha-protein kinase 3 (EC 2.7.11.-) (Myocytic induction/differentiation originator) (Midori)
Q924S8	Spred1	SPRE1_MOUSE	Q924S8_K322	TB_24H-MOCK_24H	#NUM!		0	yes	3.61269	0.0371836	Sprouty-related, EVH1 domain-containing protein 1 (Spred-1)
Q924S8	Spred1	SPRE1_MOUSE	Q924S8_K233	TB_24H-MOCK_24H	-0.405806	0.241753	0.428586	no	-0.405806	0.428586	Sprouty-related, EVH1 domain-containing protein 1 (Spred-1)
Q93092	Taldo1	TALDO_MOUSE	Q93092_K245	TB_24H-MOCK_24H	0.152468	0.701694	0.814211	no	0.152468	0.814211	Transaldolase (EC 2.2.1.2)
Q93092	Taldo1	TALDO_MOUSE	Q93092_K130	TB_24H-MOCK_24H	-1.04579	0.0128244	0.050903	no	-1.04579	0.050903	Transaldolase (EC 2.2.1.2)
Q93092	Taldo1	TALDO_MOUSE	Q93092_K277	TB_24H-MOCK_24H	-0.515408	0.21658	0.394955	no	-0.515408	0.394955	Transaldolase (EC 2.2.1.2)
Q93092	Taldo1	TALDO_MOUSE	Q93092_K265	TB_24H-MOCK_24H	-1.36665	0.0107505	0.044454	no	-1.36665	0.044454	Transaldolase (EC 2.2.1.2)
Q93092	Taldo1	TALDO_MOUSE	Q93092_K314	TB_24H-MOCK_24H	0.443904	0.503474	0.67347	no	0.443904	0.67347	Transaldolase (EC 2.2.1.2)
Q93092	Taldo1	TALDO_MOUSE	Q93092_K219	TB_24H-MOCK_24H	-0.214101	0.506066	0.673627	no	-0.214101	0.673627	Transaldolase (EC 2.2.1.2)
Q93092	Taldo1	TALDO_MOUSE	Q93092_K292	TB_24H-MOCK_24H	-0.783227	0.438201	0.620103	no	-0.783227	0.620103	Transaldolase (EC 2.2.1.2)
Q93092	Taldo1	TALDO_MOUSE	Q93092_K269	TB_24H-MOCK_24H	-0.4785	0.192012	0.364776	no	-0.4785	0.364776	Transaldolase (EC 2.2.1.2)
Q99020	Hnrnpab	ROAA_MOUSE	Q99020_K228	TB_24H-MOCK_24H	-1.26385	0.0233622	0.0793019	no	-1.26385	0.0793019	Heterogeneous nuclear ribonucleoprotein A/B (hnRNP A/B) (CArG-binding factor-A) (CBF-A)
Q99J87	Dhx58	DHX58_MOUSE	Q99J87_K49	TB_24H-MOCK_24H	#NUM!		0	yes	3.11338	0.0236874	Probable ATP-dependent RNA helicase DHX58 (EC 3.6.4.13) (Probable ATP-dependent helicase LGP2) (Protein D11Lgp2) (RIG-I-like receptor 3) (RLR-3) (RIG-I-like receptor Lgp2) (RLR)
Q99J87	Dhx58	DHX58_MOUSE	Q99J87_K39	TB_24H-MOCK_24H	2.67967	1.3005e-07	3.69713e-06	no	2.67967	3.69713e-06	Probable ATP-dependent RNA helicase DHX58 (EC 3.6.4.13) (Probable ATP-dependent helicase LGP2) (Protein D11Lgp2) (RIG-I-like receptor 3) (RLR-3) (RIG-I-like receptor Lgp2) (RLR)
Q99J87	Dhx58	DHX58_MOUSE	Q99J87_K360	TB_24H-MOCK_24H	1.3097	0.158241	0.320509	no	1.3097	0.320509	Probable ATP-dependent RNA helicase DHX58 (EC 3.6.4.13) (Probable ATP-dependent helicase LGP2) (Protein D11Lgp2) (RIG-I-like receptor 3) (RLR-3) (RIG-I-like receptor Lgp2) (RLR)
Q99J87	Dhx58	DHX58_MOUSE	Q99J87_K532	TB_24H-MOCK_24H	#NUM!		0	yes	4.39515	0.0314558	Probable ATP-dependent RNA helicase DHX58 (EC 3.6.4.13) (Probable ATP-dependent helicase LGP2) (Protein D11Lgp2) (RIG-I-like receptor 3) (RLR-3) (RIG-I-like receptor Lgp2) (RLR)
Q99JR8	Smarcd2	SMRD2_MOUSE	Q99JR8_K451	TB_24H-MOCK_24H	-0.11996	0.949185	0.967415	no	-0.11996	0.967415	SWI/SNF-related matrix-associated actin-dependent regulator of chromatin subfamily D member 2 (60 kDa BRG-1/Brm-associated factor subunit B) (BRG1-associated factor 60B) (BAF60B)
Q99JY9	Actr3	ARP3_MOUSE	Q99JY9_K38	TB_24H-MOCK_24H	0.532447	0.126302	0.271353	no	0.532447	0.271353	Actin-related protein 3 (Actin-like protein 3)
Q99JY9	Actr3	ARP3_MOUSE	Q99JY9_K225	TB_24H-MOCK_24H	-0.635061	0.164408	0.329229	no	-0.635061	0.329229	Actin-related protein 3 (Actin-like protein 3)
Q99JY9	Actr3	ARP3_MOUSE	Q99JY9_K264	TB_24H-MOCK_24H	1.06355	2.14732e-06	3.92935e-05	no	1.06355	3.92935e-05	Actin-related protein 3 (Actin-like protein 3)
Q99JY9	Actr3	ARP3_MOUSE	Q99JY9_K317	TB_24H-MOCK_24H	0.828429	0.163176	0.328	no	0.828429	0.328	Actin-related protein 3 (Actin-like protein 3)
Q99K48	Nono	NONO_MOUSE	Q99K48_K200	TB_24H-MOCK_24H	-0.0941671	0.673768	0.795726	no	-0.0941671	0.795726	Non-POU domain-containing octamer-binding protein (NonO protein)
Q99K85	Psat1	SERC_MOUSE	Q99K85_K117	TB_24H-MOCK_24H	1.00622	0.00584874	0.026911	no	1.00622	0.026911	Phosphoserine aminotransferase (PSAT) (EC 2.6.1.52) (Endometrial progesterone-induced protein) (EPIP) (Phosphohydroxythreonine aminotransferase)
Q99KC8	Vwa5a	VMA5A_MOUSE	Q99KC8_K656	TB_24H-MOCK_24H	0.273822	0.494815	0.668936	no	0.273822	0.668936	von Willebrand factor A domain-containing protein 5A (Loss of heterozygosity 11 chromosomal region 2 gene A protein homolog)
Q99KC8	Vwa5a	VMA5A_MOUSE	Q99KC8_K447	TB_24H-MOCK_24H	0.341608	0.199727	0.374959	no	0.341608	0.374959	von Willebrand factor A domain-containing protein 5A (Loss of heterozygosity 11 chromosomal region 2 gene A protein homolog)
Q99KC8	Vwa5a	VMA5A_MOUSE	Q99KC8_K551	TB_24H-MOCK_24H	1.38709	5.16905e-09	2.35118e-07	no	1.38709	2.35118e-07	von Willebrand factor A domain-containing protein 5A (Loss of heterozygosity 11 chromosomal region 2 gene A protein homolog)
Q99KC8	Vwa5a	VMA5A_MOUSE	Q99KC8_K630	TB_24H-MOCK_24H	0.253846	0.470026	0.649549	no	0.253846	0.649549	von Willebrand factor A domain-containing protein 5A (Loss of heterozygosity 11 chromosomal region 2 gene A protein homolog)
Q99KP3	Cryl1	CRYL1_MOUSE	Q99KP3_K63	TB_24H-MOCK_24H	-0.155944	0.785099	0.868574	no	-0.155944	0.868574	Lambda-crystallin homolog (EC 1.1.1.45) (L-gulonate 3-dehydrogenase) (Gul3DH)
Q99KQ4	Nampt	NAMPT_MOUSE	Q99KQ4_K229	TB_24H-MOCK_24H	2.32218	7.8656e-07	1.76367e-05	no	2.32218	1.76367e-05	Nicotinamide phosphoribosyltransferase (NAmPRTase) (Nampt) (EC 2.4.2.12) (Pre-B-cell colony-enhancing factor 1 homolog) (PBEF) (Visfatin)
Q99KQ4	Nampt	NAMPT_MOUSE	Q99KQ4_K342	TB_24H-MOCK_24H	2.664	2.1938e-13	1.43519e-10	no	2.664	1.43519e-10	Nicotinamide phosphoribosyltransferase (NAmPRTase) (Nampt) (EC 2.4.2.12) (Pre-B-cell colony-enhancing factor 1 homolog) (PBEF) (Visfatin)
Q99KQ4	Nampt	NAMPT_MOUSE	Q99KQ4_K117	TB_24H-MOCK_24H	1.42316	0.21294	0.391125	no	1.42316	0.391125	Nicotinamide phosphoribosyltransferase (NAmPRTase) (Nampt) (EC 2.4.2.12) (Pre-B-cell colony-enhancing factor 1 homolog) (PBEF) (Visfatin)
Q99KQ4	Nampt	NAMPT_MOUSE	Q99KQ4_K24	TB_24H-MOCK_24H	2.25664	0.000893918	0.00590505	no	2.25664	0.00590505	Nicotinamide phosphoribosyltransferase (NAmPRTase) (Nampt) (EC 2.4.2.12) (Pre-B-cell colony-enhancing factor 1 homolog) (PBEF) (Visfatin)
Q99KQ4	Nampt	NAMPT_MOUSE	Q99KQ4_K32	TB_24H-MOCK_24H	2.11864	9.4977e-05	0.000921972	no	2.11864	0.000921972	Nicotinamide phosphoribosyltransferase (NAmPRTase) (Nampt) (EC 2.4.2.12) (Pre-B-cell colony-enhancing factor 1 homolog) (PBEF) (Visfatin)
Q99L04	Dhrs1	DHRS1_MOUSE	Q99L04_K6	TB_24H-MOCK_24H	#NUM!		0	yes	2.7489	0.0160363	Dehydrogenase/reductase SDR family member 1 (EC 1.1.-.-)
Q99L47	St13	F10A1_MOUSE	Q99L47_K362	TB_24H-MOCK_24H	#NUM!		0	yes	2.48442	0.04673	Hsc70-interacting protein (Hip) (Protein FAM10A1) (Protein ST13 homolog)
Q99L47	St13	F10A1_MOUSE	Q99L47_K152	TB_24H-MOCK_24H	1.5181	0.0026164	0.0148231	no	1.5181	0.0148231	Hsc70-interacting protein (Hip) (Protein FAM10A1) (Protein ST13 homolog)
Q99LI8	Hgs	HGS_MOUSE	Q99LI8_K511	TB_24H-MOCK_24H	0.445858	0.490132	0.666789	no	0.445858	0.666789	Hepatocyte growth factor-regulated tyrosine kinase substrate
Q99LR1	Abhd12	ABD12_MOUSE	Q99LR1_K37	TB_24H-MOCK_24H	#NUM!		0	yes	-3.93179	0.0164228	Monoacylglycerol lipase ABHD12 (EC 3.1.1.23) (2-arachidonoylglycerol hydrolase) (Abhydrolase domain-containing protein 12)
Q99MK8	Grk2	ARBK1_MOUSE	Q99MK8_K448	TB_24H-MOCK_24H	1.5591	4.34256e-06	6.52203e-05	no	1.5591	6.52203e-05	Beta-adrenergic receptor kinase 1 (Beta-ARK-1) (EC 2.7.11.15) (G-protein-coupled receptor kinase 2)
Q99N69	Lpxn	LPXN_MOUSE	Q99N69_K382	TB_24H-MOCK_24H	0.584618	0.147865	0.304528	no	0.584618	0.304528	Leupaxin
Q99P91	Gpnmb	GPNMB_MOUSE	Q99P91_K543	TB_24H-MOCK_24H	0.840021	0.168859	0.335192	no	0.840021	0.335192	Transmembrane glycoprotein NMB (DC-HIL) (Dendritic cell-associated transmembrane protein) (Osteoactivin)
Q99P91	Gpnmb	GPNMB_MOUSE	Q99P91_K225	TB_24H-MOCK_24H	2.1788	0.00142864	0.00884977	no	2.1788	0.00884977	Transmembrane glycoprotein NMB (DC-HIL) (Dendritic cell-associated transmembrane protein) (Osteoactivin)
Q99P91	Gpnmb	GPNMB_MOUSE	Q99P91_K541,Q99P91_K543	TB_24H-MOCK_24H	-0.12177	0.839796	0.905796	no	-0.12177	0.905796	Transmembrane glycoprotein NMB (DC-HIL) (Dendritic cell-associated transmembrane protein) (Osteoactivin)
Q99P91	Gpnmb	GPNMB_MOUSE	Q99P91_K530	TB_24H-MOCK_24H	-0.368289	0.639478	0.772862	no	-0.368289	0.772862	Transmembrane glycoprotein NMB (DC-HIL) (Dendritic cell-associated transmembrane protein) (Osteoactivin)
Q99PL5	Rrbp1	RRBP1_MOUSE	Q99PL5_K902	TB_24H-MOCK_24H	0.235302	0.559732	0.714827	no	0.235302	0.714827	Ribosome-binding protein 1 (Ribosome receptor protein) (RRp) (mRRp)
Q99PL5	Rrbp1	RRBP1_MOUSE	Q99PL5_K199	TB_24H-MOCK_24H	-0.967079	0.167284	0.332479	no	-0.967079	0.332479	Ribosome-binding protein 1 (Ribosome receptor protein) (RRp) (mRRp)
Q9CPR7	Sike1	SIKE1_MOUSE	Q9CPR7_K110,Q9CPR7_K119	TB_24H-MOCK_24H	-0.581093	0.394796	0.579811	no	-0.581093	0.579811	Suppressor of IKBKE 1 (Suppressor of IKK-epsilon)
Q9CPW4	Arpc5	ARPC5_MOUSE	Q9CPW4_K3	TB_24H-MOCK_24H	-1.50414	0.314264	0.503835	no	-1.50414	0.503835	Actin-related protein 2/3 complex subunit 5 (Arp2/3 complex 16 kDa subunit) (p16-ARC)
Q9CQ22	Lamtor1	LTOR1_MOUSE	Q9CQ22_K20	TB_24H-MOCK_24H	-0.698462	0.273433	0.460981	no	-0.698462	0.460981	Ragulator complex protein LAMTOR1 (Late endosomal/lysosomal adaptor and MAPK and MTOR activator 1) (Lipid raft adaptor protein p18)
Q9CQA1	Trappc5	TPPC5_MOUSE	Q9CQA1_K9	TB_24H-MOCK_24H	0.773301	0.000256924	0.00208746	no	0.773301	0.00208746	Trafficking protein particle complex subunit 5
Q9CQC6	Bzw1	BZW1_MOUSE	Q9CQC6_K5	TB_24H-MOCK_24H	-0.28568	0.663595	0.786932	no	-0.28568	0.786932	Basic leucine zipper and W2 domain-containing protein 1
Q9CQD1	Rab5a	RAB5A_MOUSE	Q9CQD1_K134	TB_24H-MOCK_24H	0.314353	0.61283	0.751637	no	0.314353	0.751637	Ras-related protein Rab-5A
Q9CQD1	Rab5a	RAB5A_MOUSE	Q9CQD1_K140	TB_24H-MOCK_24H	2.09236	0.0163611	0.0601545	no	2.09236	0.0601545	Ras-related protein Rab-5A
Q9CQI6	Cotl1	COTL1_MOUSE	Q9CQI6_K7	TB_24H-MOCK_24H	-1.65693	0.0179257	0.0641296	no	-1.65693	0.0641296	Coactosin-like protein
Q9CQI6	Cotl1	COTL1_MOUSE	Q9CQI6_K4	TB_24H-MOCK_24H	-0.430597	0.0108902	0.0449152	no	-0.430597	0.0449152	Coactosin-like protein
Q9CQI6	Cotl1	COTL1_MOUSE	Q9CQI6_K72	TB_24H-MOCK_24H	-0.219236	0.418572	0.602117	no	-0.219236	0.602117	Coactosin-like protein
Q9CQR2	Rps21	RS21_MOUSE	Q9CQR2_K81	TB_24H-MOCK_24H	-0.285236	0.76157	0.858046	no	-0.285236	0.858046	40S ribosomal protein S21
Q9CQR2	Rps21	RS21_MOUSE	Q9CQR2_K51	TB_24H-MOCK_24H	0.0795238	0.82957	0.899559	no	0.0795238	0.899559	40S ribosomal protein S21
Q9CQV8	Ywhab	1433B_MOUSE	Q9CQV8_K11	TB_24H-MOCK_24H	-0.376431	0.603794	0.745282	no	-0.376431	0.745282	14-3-3 protein beta/alpha (Protein kinase C inhibitor protein 1) (KCIP-1) [Cleaved into: 14-3-3 protein beta/alpha, N-terminally processed]
Q9CQV8	Ywhab	1433B_MOUSE	Q9CQV8_K13	TB_24H-MOCK_24H	-0.705438	0.0145366	0.0553385	no	-0.705438	0.0553385	14-3-3 protein beta/alpha (Protein kinase C inhibitor protein 1) (KCIP-1) [Cleaved into: 14-3-3 protein beta/alpha, N-terminally processed]
Q9CQW2	Arl8b	ARL8B_MOUSE	Q9CQW2_K141	TB_24H-MOCK_24H	0.240284	0.426411	0.609925	no	0.240284	0.609925	ADP-ribosylation factor-like protein 8B (ADP-ribosylation factor-like protein 10C) (Novel small G protein indispensable for equal chromosome segregation 1)
Q9CQW9	Ifitm3	IFM3_MOUSE	Q9CQW9_K24	TB_24H-MOCK_24H	1.78335	0.0551711	0.151617	no	1.78335	0.151617	Interferon-induced transmembrane protein 3 (Dispanin subfamily A member 2b) (DSPA2b) (Fragilis protein) (Interferon-inducible protein 15) (Mouse ifitm-like protein 1) (Mil-1)
Q9CQX4	Paf	PAF15_MOUSE	Q9CQX4_K24	TB_24H-MOCK_24H	-6.08212	1.73141e-09	9.188e-08	no	-6.08212	9.188e-08	PCNA-associated factor (HCV NS5A-transactivated protein 9 homolog) (PCNA-associated factor of 15 kDa) (PAF15) (p15PAF)
Q9CQX4	Paf	PAF15_MOUSE	Q9CQX4_K15	TB_24H-MOCK_24H	-5.80589	0.00652469	0.0294258	no	-5.80589	0.0294258	PCNA-associated factor (HCV NS5A-transactivated protein 9 homolog) (PCNA-associated factor of 15 kDa) (PAF15) (p15PAF)
Q9CR16	Ppid	PPID_MOUSE	Q9CR16_K9	TB_24H-MOCK_24H	-0.417884	0.0892991	0.21124	no	-0.417884	0.21124	Peptidyl-prolyl cis-trans isomerase D (PPIase D) (EC 5.2.1.8) (40 kDa peptidyl-prolyl cis-trans isomerase) (Cyclophilin-40) (CYP-40) (Rotamase D)
Q9CR16	Ppid	PPID_MOUSE	Q9CR16_K14	TB_24H-MOCK_24H	-0.482271	0.0349683	0.108518	no	-0.482271	0.108518	Peptidyl-prolyl cis-trans isomerase D (PPIase D) (EC 5.2.1.8) (40 kDa peptidyl-prolyl cis-trans isomerase) (Cyclophilin-40) (CYP-40) (Rotamase D)
Q9CR57	Rpl14	RL14_MOUSE	Q9CR57_K162	TB_24H-MOCK_24H	0.101945	0.769429	0.860391	no	0.101945	0.860391	60S ribosomal protein L14
Q9CR57	Rpl14	RL14_MOUSE	Q9CR57_K160	TB_24H-MOCK_24H	-0.193855	0.717145	0.826118	no	-0.193855	0.826118	60S ribosomal protein L14
Q9CR57	Rpl14	RL14_MOUSE	Q9CR57_K147	TB_24H-MOCK_24H	-0.0260668	0.945945	0.967209	no	-0.0260668	0.967209	60S ribosomal protein L14
Q9CVB6	Arpc2	ARPC2_MOUSE	Q9CVB6_K295	TB_24H-MOCK_24H	-0.649217	0.0536763	0.148604	no	-0.649217	0.148604	Actin-related protein 2/3 complex subunit 2 (Arp2/3 complex 34 kDa subunit) (p34-ARC)
Q9CVB6	Arpc2	ARPC2_MOUSE	Q9CVB6_K275	TB_24H-MOCK_24H	0.517606	0.215152	0.393251	no	0.517606	0.393251	Actin-related protein 2/3 complex subunit 2 (Arp2/3 complex 34 kDa subunit) (p34-ARC)
Q9CWJ9	Atic	PUR9_MOUSE	Q9CWJ9_K266	TB_24H-MOCK_24H	0.820456	0.108109	0.241415	no	0.820456	0.241415	Bifunctional purine biosynthesis protein PURH [Cleaved into: Bifunctional purine biosynthesis protein PURH, N-terminally processed] [Includes: Phosphoribosylaminoimidazolecarboxamide formyltransferase (EC 2.1.2.3) (5-aminoimidazole-4-carboxamide ribonucleotide formyltransferase) (AICAR transformylase); IMP cyclohydrolase (EC 3.5.4.10) (ATIC) (IMP synthase) (Inosinicase)]
Q9CWJ9	Atic	PUR9_MOUSE	Q9CWJ9_K199	TB_24H-MOCK_24H	0.459658	0.163519	0.328274	no	0.459658	0.328274	Bifunctional purine biosynthesis protein PURH [Cleaved into: Bifunctional purine biosynthesis protein PURH, N-terminally processed] [Includes: Phosphoribosylaminoimidazolecarboxamide formyltransferase (EC 2.1.2.3) (5-aminoimidazole-4-carboxamide ribonucleotide formyltransferase) (AICAR transformylase); IMP cyclohydrolase (EC 3.5.4.10) (ATIC) (IMP synthase) (Inosinicase)]
Q9CWJ9	Atic	PUR9_MOUSE	Q9CWJ9_K66	TB_24H-MOCK_24H	0.146716	0.817833	0.894224	no	0.146716	0.894224	Bifunctional purine biosynthesis protein PURH [Cleaved into: Bifunctional purine biosynthesis protein PURH, N-terminally processed] [Includes: Phosphoribosylaminoimidazolecarboxamide formyltransferase (EC 2.1.2.3) (5-aminoimidazole-4-carboxamide ribonucleotide formyltransferase) (AICAR transformylase); IMP cyclohydrolase (EC 3.5.4.10) (ATIC) (IMP synthase) (Inosinicase)]
Q9CWJ9	Atic	PUR9_MOUSE	Q9CWJ9_K223	TB_24H-MOCK_24H	-0.285741	0.51087	0.675503	no	-0.285741	0.675503	Bifunctional purine biosynthesis protein PURH [Cleaved into: Bifunctional purine biosynthesis protein PURH, N-terminally processed] [Includes: Phosphoribosylaminoimidazolecarboxamide formyltransferase (EC 2.1.2.3) (5-aminoimidazole-4-carboxamide ribonucleotide formyltransferase) (AICAR transformylase); IMP cyclohydrolase (EC 3.5.4.10) (ATIC) (IMP synthase) (Inosinicase)]
Q9CWK8	Snx2	SNX2_MOUSE	Q9CWK8_K218	TB_24H-MOCK_24H	-0.115237	0.765492	0.860391	no	-0.115237	0.860391	Sorting nexin-2
Q9CWK8	Snx2	SNX2_MOUSE	Q9CWK8_K487	TB_24H-MOCK_24H	0.620208	0.108443	0.241434	no	0.620208	0.241434	Sorting nexin-2
Q9CWK8	Snx2	SNX2_MOUSE	Q9CWK8_K287	TB_24H-MOCK_24H	-1.521	0.0491047	0.139349	no	-1.521	0.139349	Sorting nexin-2
Q9CWK8	Snx2	SNX2_MOUSE	Q9CWK8_K181	TB_24H-MOCK_24H	0.542339	0.00532456	0.025339	no	0.542339	0.025339	Sorting nexin-2
Q9CWK8	Snx2	SNX2_MOUSE	Q9CWK8_K116	TB_24H-MOCK_24H	-0.483192	0.0530907	0.147936	no	-0.483192	0.147936	Sorting nexin-2
Q9CWK8	Snx2	SNX2_MOUSE	Q9CWK8_K248	TB_24H-MOCK_24H	#NUM!		0	yes	4.90932	0.0377908	Sorting nexin-2
Q9CWK8	Snx2	SNX2_MOUSE	Q9CWK8_K193	TB_24H-MOCK_24H	0.628452	0.147494	0.304159	no	0.628452	0.304159	Sorting nexin-2
Q9CX00	Ist1	IST1_MOUSE	Q9CX00_K7	TB_24H-MOCK_24H	#NUM!		0	yes	2.72721	0.0354595	IST1 homolog
Q9CXF4	Tbc1d15	TBC15_MOUSE	Q9CXF4_K324	TB_24H-MOCK_24H	1.08109	0.0027956	0.0156161	no	1.08109	0.0156161	TBC1 domain family member 15 (GTPase-activating protein RAB7) (GAP for RAB7) (Rab7-GAP)
Q9CXF4	Tbc1d15	TBC15_MOUSE	Q9CXF4_K322	TB_24H-MOCK_24H	0.705293	0.106588	0.240144	no	0.705293	0.240144	TBC1 domain family member 15 (GTPase-activating protein RAB7) (GAP for RAB7) (Rab7-GAP)
Q9CXW4	Rpl11	RL11_MOUSE	Q9CXW4_K52	TB_24H-MOCK_24H	-0.17175	0.589074	0.733807	no	-0.17175	0.733807	60S ribosomal protein L11
Q9CXW4	Rpl11	RL11_MOUSE	Q9CXW4_K154	TB_24H-MOCK_24H	-0.701059	0.0141851	0.0542851	no	-0.701059	0.0542851	60S ribosomal protein L11
Q9CY34	Ube2f	UB2FA_MOUSE	Q9CY34_K7	TB_24H-MOCK_24H	-0.704384	0.0729065	0.181923	no	-0.704384	0.181923	NEDD8-conjugating enzyme UBE2F (EC 6.3.2.-) (NEDD8 carrier protein UBE2F) (NEDD8 protein ligase UBE2F) (NEDD8-conjugating enzyme 2) (Ubiquitin-conjugating enzyme E2 F)
Q9CYL5	Glipr2	GAPR1_MOUSE	Q9CYL5_K53	TB_24H-MOCK_24H	#NUM!		0	yes	4.68423	0.0268351	Golgi-associated plant pathogenesis-related protein 1 (GAPR-1) (Golgi-associated PR-1 protein) (Glioma pathogenesis-related protein 2) (GliPR 2)
Q9CZ44	Nsfl1c	NSF1C_MOUSE	Q9CZ44_K251	TB_24H-MOCK_24H	-1.06712	0.069087	0.17669	no	-1.06712	0.17669	NSFL1 cofactor p47 (p97 cofactor p47)
Q9CZX8	Rps19	RS19_MOUSE	Q9CZX8_K144	TB_24H-MOCK_24H	-0.108783	0.848979	0.911994	no	-0.108783	0.911994	40S ribosomal protein S19
Q9CZY3	Ube2v1	UB2V1_MOUSE	Q9CZY3_K10	TB_24H-MOCK_24H	0.0402582	0.880767	0.930445	no	0.0402582	0.930445	Ubiquitin-conjugating enzyme E2 variant 1 (UEV-1) (CROC-1)
Q9CZY3	Ube2v1	UB2V1_MOUSE	Q9CZY3_K68	TB_24H-MOCK_24H	0.561019	0.221457	0.40064	no	0.561019	0.40064	Ubiquitin-conjugating enzyme E2 variant 1 (UEV-1) (CROC-1)
Q9D0E1	Hnrnpm	HNRPM_MOUSE	Q9D0E1_K387	TB_24H-MOCK_24H	0.545523	0.396587	0.581904	no	0.545523	0.581904	Heterogeneous nuclear ribonucleoprotein M (hnRNP M)
Q9D0E1	Hnrnpm	HNRPM_MOUSE	Q9D0E1_K380	TB_24H-MOCK_24H	0.505596	0.394113	0.579343	no	0.505596	0.579343	Heterogeneous nuclear ribonucleoprotein M (hnRNP M)
Q9D0F9	Pgm1	PGM1_MOUSE	Q9D0F9_K16	TB_24H-MOCK_24H	2.85376	1.9857e-10	1.58062e-08	no	2.85376	1.58062e-08	Phosphoglucomutase-1 (PGM 1) (EC 5.4.2.2) (Glucose phosphomutase 1) (Phosphoglucomutase-2)
Q9D0F9	Pgm1	PGM1_MOUSE	Q9D0F9_K234	TB_24H-MOCK_24H	1.01794	0.2924	0.480866	no	1.01794	0.480866	Phosphoglucomutase-1 (PGM 1) (EC 5.4.2.2) (Glucose phosphomutase 1) (Phosphoglucomutase-2)
Q9D0F9	Pgm1	PGM1_MOUSE	Q9D0F9_K235	TB_24H-MOCK_24H	1.44566	0.0591728	0.157794	no	1.44566	0.157794	Phosphoglucomutase-1 (PGM 1) (EC 5.4.2.2) (Glucose phosphomutase 1) (Phosphoglucomutase-2)
Q9D0I9	Rars	SYRC_MOUSE	Q9D0I9_K393	TB_24H-MOCK_24H	0.930776	0.00409117	0.0208087	no	0.930776	0.0208087	Arginine--tRNA ligase, cytoplasmic (EC 6.1.1.19) (Arginyl-tRNA synthetase) (ArgRS)
Q9D0S9	Hint2	HINT2_MOUSE	Q9D0S9_K139	TB_24H-MOCK_24H	0.0727532	0.8563	0.916765	no	0.0727532	0.916765	Histidine triad nucleotide-binding protein 2, mitochondrial (HINT-2) (EC 3.-.-.-) (HINT-3)
Q9D1A2	Cndp2	CNDP2_MOUSE	Q9D1A2_K203	TB_24H-MOCK_24H	1.27006	0.00287646	0.0159004	no	1.27006	0.0159004	Cytosolic non-specific dipeptidase (EC 3.4.13.18) (CNDP dipeptidase 2) (Glutamate carboxypeptidase-like protein 1)
Q9D1A2	Cndp2	CNDP2_MOUSE	Q9D1A2_K124	TB_24H-MOCK_24H	1.97979	6.51035e-13	2.59112e-10	no	1.97979	2.59112e-10	Cytosolic non-specific dipeptidase (EC 3.4.13.18) (CNDP dipeptidase 2) (Glutamate carboxypeptidase-like protein 1)
Q9D1A2	Cndp2	CNDP2_MOUSE	Q9D1A2_K364	TB_24H-MOCK_24H	2.42428	5.46014e-05	0.000550161	no	2.42428	0.000550161	Cytosolic non-specific dipeptidase (EC 3.4.13.18) (CNDP dipeptidase 2) (Glutamate carboxypeptidase-like protein 1)
Q9D1A2	Cndp2	CNDP2_MOUSE	Q9D1A2_K91	TB_24H-MOCK_24H	0.177955	0.918635	0.950889	no	0.177955	0.950889	Cytosolic non-specific dipeptidase (EC 3.4.13.18) (CNDP dipeptidase 2) (Glutamate carboxypeptidase-like protein 1)
Q9D1A2	Cndp2	CNDP2_MOUSE	Q9D1A2_K92	TB_24H-MOCK_24H	#NUM!		0	yes	5.52597	0.0471445	Cytosolic non-specific dipeptidase (EC 3.4.13.18) (CNDP dipeptidase 2) (Glutamate carboxypeptidase-like protein 1)
Q9D1D4	Tmed10	TMEDA_MOUSE	Q9D1D4_K143	TB_24H-MOCK_24H	-0.226011	0.898595	0.93869	no	-0.226011	0.93869	Transmembrane emp24 domain-containing protein 10 (21 kDa transmembrane-trafficking protein) (Transmembrane protein Tmp21) (p24 family protein delta-1) (p24delta1)
Q9D1D4	Tmed10	TMEDA_MOUSE	Q9D1D4_K140	TB_24H-MOCK_24H	-0.961549	0.658406	0.785841	no	-0.961549	0.785841	Transmembrane emp24 domain-containing protein 10 (21 kDa transmembrane-trafficking protein) (Transmembrane protein Tmp21) (p24 family protein delta-1) (p24delta1)
Q9D1G1	Rab1b	RAB1B_MOUSE	Q9D1G1_K122	TB_24H-MOCK_24H	-0.904329	0.0576176	0.154683	no	-0.904329	0.154683	Ras-related protein Rab-1B
Q9D1R9	Rpl34	RL34_MOUSE	Q9D1R9_K108	TB_24H-MOCK_24H	-0.227588	0.405202	0.589116	no	-0.227588	0.589116	60S ribosomal protein L34
Q9D2V7	Coro7	CORO7_MOUSE	Q9D2V7_K654	TB_24H-MOCK_24H	0.876817	0.0485698	0.138324	no	0.876817	0.138324	Coronin-7 (Crn7) (70 kDa WD repeat tumor rejection antigen homolog)
Q9D3B1	Hacd2	HACD2_MOUSE	Q9D3B1_K11	TB_24H-MOCK_24H	-0.851849	0.00013797	0.00124095	no	-0.851849	0.00124095	Very-long-chain (3R)-3-hydroxyacyl-CoA dehydratase 2 (EC 4.2.1.134) (3-hydroxyacyl-CoA dehydratase 2) (HACD2) (Protein-tyrosine phosphatase-like member B)
Q9D486	Cmip	CMIP_MOUSE	Q9D486_K79	TB_24H-MOCK_24H	0.651535	0.00390153	0.0200857	no	0.651535	0.0200857	C-Maf-inducing protein (c-Mip)
Q9D486	Cmip	CMIP_MOUSE	Q9D486_K74	TB_24H-MOCK_24H	0.567084	0.0172025	0.0622417	no	0.567084	0.0622417	C-Maf-inducing protein (c-Mip)
Q9D5V5	Cul5	CUL5_MOUSE	Q9D5V5_K724	TB_24H-MOCK_24H	0.298558	0.449797	0.629795	no	0.298558	0.629795	Cullin-5 (CUL-5)
Q9D662	Sec23b	SC23B_MOUSE	Q9D662_K494	TB_24H-MOCK_24H	1.69222	0.000778357	0.00529549	no	1.69222	0.00529549	Protein transport protein Sec23B (SEC23-related protein B)
Q9D684	Rin2	RIN2_MOUSE	Q9D684_K503	TB_24H-MOCK_24H	0.197803	0.676766	0.796902	no	0.197803	0.796902	Ras and Rab interactor 2 (Ras interaction/interference protein 2)
Q9D710	Tmx2	TMX2_MOUSE	Q9D710_K295	TB_24H-MOCK_24H	#NUM!		0	yes	-4.41941	0.0337285	Thioredoxin-related transmembrane protein 2 (Thioredoxin domain-containing protein 14)
Q9D823	Rpl37	RL37_MOUSE	Q9D823_K31	TB_24H-MOCK_24H	-0.158525	0.766304	0.860391	no	-0.158525	0.860391	60S ribosomal protein L37
Q9D8C4	Ifi35	IN35_MOUSE	Q9D8C4_K30	TB_24H-MOCK_24H	#NUM!		0	yes	4.97276	0.0128908	Interferon-induced 35 kDa protein homolog (IFP 35) (Ifi-35)
Q9D8C4	Ifi35	IN35_MOUSE	Q9D8C4_K57	TB_24H-MOCK_24H	2.34151	6.87212e-07	1.5636e-05	no	2.34151	1.5636e-05	Interferon-induced 35 kDa protein homolog (IFP 35) (Ifi-35)
Q9D8C4	Ifi35	IN35_MOUSE	Q9D8C4_K98	TB_24H-MOCK_24H	2.11561	4.70242e-07	1.15173e-05	no	2.11561	1.15173e-05	Interferon-induced 35 kDa protein homolog (IFP 35) (Ifi-35)
Q9D8C4	Ifi35	IN35_MOUSE	Q9D8C4_K40	TB_24H-MOCK_24H	#NUM!		0	yes	4.8197	0.0113818	Interferon-induced 35 kDa protein homolog (IFP 35) (Ifi-35)
Q9D8E6	Rpl4	RL4_MOUSE	Q9D8E6_K364	TB_24H-MOCK_24H	#NUM!		0	yes	3.68256	0.0337765	60S ribosomal protein L4
Q9D8E6	Rpl4	RL4_MOUSE	Q9D8E6_K352	TB_24H-MOCK_24H	0.472874	0.276034	0.461677	no	0.472874	0.461677	60S ribosomal protein L4
Q9D8E6	Rpl4	RL4_MOUSE	Q9D8E6_K14	TB_24H-MOCK_24H	1.31576	0.0560872	0.152373	no	1.31576	0.152373	60S ribosomal protein L4
Q9D8E6	Rpl4	RL4_MOUSE	Q9D8E6_K333	TB_24H-MOCK_24H	0.514519	0.532233	0.692315	no	0.514519	0.692315	60S ribosomal protein L4
Q9D8E6	Rpl4	RL4_MOUSE	Q9D8E6_K294	TB_24H-MOCK_24H	-0.498171	0.0090854	0.0386737	no	-0.498171	0.0386737	60S ribosomal protein L4
Q9D8E6	Rpl4	RL4_MOUSE	Q9D8E6_K175	TB_24H-MOCK_24H	1.25315	0.0832754	0.200263	no	1.25315	0.200263	60S ribosomal protein L4
Q9D8E6	Rpl4	RL4_MOUSE	Q9D8E6_K327	TB_24H-MOCK_24H	-0.468937	0.108585	0.241434	no	-0.468937	0.241434	60S ribosomal protein L4
Q9D8N0	Eef1g	EF1G_MOUSE	Q9D8N0_K147	TB_24H-MOCK_24H	-0.779631	0.0104866	0.0434755	no	-0.779631	0.0434755	Elongation factor 1-gamma (EF-1-gamma) (eEF-1B gamma)
Q9D8N0	Eef1g	EF1G_MOUSE	Q9D8N0_K294	TB_24H-MOCK_24H	#NUM!		0	yes	2.76324	0.0131558	Elongation factor 1-gamma (EF-1-gamma) (eEF-1B gamma)
Q9D8N0	Eef1g	EF1G_MOUSE	Q9D8N0_K208	TB_24H-MOCK_24H	0.0126186	0.955438	0.970681	no	0.0126186	0.970681	Elongation factor 1-gamma (EF-1-gamma) (eEF-1B gamma)
Q9D8U8	Snx5	SNX5_MOUSE	Q9D8U8_K229	TB_24H-MOCK_24H	1.67333	0.00108155	0.00699932	no	1.67333	0.00699932	Sorting nexin-5
Q9D8Y0	Efhd2	EFHD2_MOUSE	Q9D8Y0_K9	TB_24H-MOCK_24H	-0.906197	0.334953	0.522789	no	-0.906197	0.522789	EF-hand domain-containing protein D2 (Swiprosin-1)
Q9D8Y7	Tnfaip8l2	TP8L2_MOUSE	Q9D8Y7_K7	TB_24H-MOCK_24H	0.385318	0.539617	0.698431	no	0.385318	0.698431	Tumor necrosis factor alpha-induced protein 8-like protein 2 (TIPE2) (TNF alpha-induced protein 8-like protein 2) (TNFAIP8-like protein 2)
Q9DAR7	Dcps	DCPS_MOUSE	Q9DAR7_K141	TB_24H-MOCK_24H	-1.79553	0.000196316	0.00167131	no	-1.79553	0.00167131	m7GpppX diphosphatase (EC 3.6.1.59) (DCS-1) (Decapping scavenger enzyme) (Hint-related 7meGMP-directed hydrolase) (Histidine triad nucleotide-binding protein 5) (Histidine triad protein member 5) (HINT-5) (Scavenger mRNA-decapping enzyme DcpS)
Q9DAR7	Dcps	DCPS_MOUSE	Q9DAR7_K9	TB_24H-MOCK_24H	-1.01029	0.300248	0.487664	no	-1.01029	0.487664	m7GpppX diphosphatase (EC 3.6.1.59) (DCS-1) (Decapping scavenger enzyme) (Hint-related 7meGMP-directed hydrolase) (Histidine triad nucleotide-binding protein 5) (Histidine triad protein member 5) (HINT-5) (Scavenger mRNA-decapping enzyme DcpS)
Q9DAR7	Dcps	DCPS_MOUSE	Q9DAR7_K137	TB_24H-MOCK_24H	-2.53995	2.25683e-05	0.00025125	no	-2.53995	0.00025125	m7GpppX diphosphatase (EC 3.6.1.59) (DCS-1) (Decapping scavenger enzyme) (Hint-related 7meGMP-directed hydrolase) (Histidine triad nucleotide-binding protein 5) (Histidine triad protein member 5) (HINT-5) (Scavenger mRNA-decapping enzyme DcpS)
Q9DAS9	Gng12	GBG12_MOUSE	Q9DAS9_K34	TB_24H-MOCK_24H	-0.653234	0.246873	0.43332	no	-0.653234	0.43332	Guanine nucleotide-binding protein G(I)/G(S)/G(O) subunit gamma-12
Q9DAS9	Gng12	GBG12_MOUSE	Q9DAS9_K4	TB_24H-MOCK_24H	-0.518067	0.150848	0.309073	no	-0.518067	0.309073	Guanine nucleotide-binding protein G(I)/G(S)/G(O) subunit gamma-12
Q9DBC7	Prkar1a	KAP0_MOUSE	Q9DBC7_K70	TB_24H-MOCK_24H	1.13089	0.242612	0.429117	no	1.13089	0.429117	cAMP-dependent protein kinase type I-alpha regulatory subunit [Cleaved into: cAMP-dependent protein kinase type I-alpha regulatory subunit, N-terminally processed]
Q9DBC7	Prkar1a	KAP0_MOUSE	Q9DBC7_K367	TB_24H-MOCK_24H	-0.299664	0.40348	0.587964	no	-0.299664	0.587964	cAMP-dependent protein kinase type I-alpha regulatory subunit [Cleaved into: cAMP-dependent protein kinase type I-alpha regulatory subunit, N-terminally processed]
Q9DBE0	Csad	CSAD_MOUSE	Q9DBE0_K188	TB_24H-MOCK_24H	0.486711	0.47127	0.650703	no	0.486711	0.650703	Cysteine sulfinic acid decarboxylase (EC 4.1.1.29) (Cysteine-sulfinate decarboxylase) (Sulfinoalanine decarboxylase)
Q9DBE0	Csad	CSAD_MOUSE	Q9DBE0_K196	TB_24H-MOCK_24H	0.264818	0.584443	0.731043	no	0.264818	0.731043	Cysteine sulfinic acid decarboxylase (EC 4.1.1.29) (Cysteine-sulfinate decarboxylase) (Sulfinoalanine decarboxylase)
Q9DBJ1	Pgam1	PGAM1_MOUSE	Q9DBJ1_K106	TB_24H-MOCK_24H	-0.458564	0.126171	0.271353	no	-0.458564	0.271353	Phosphoglycerate mutase 1 (EC 5.4.2.11) (EC 5.4.2.4) (BPG-dependent PGAM 1) (Phosphoglycerate mutase isozyme B) (PGAM-B)
Q9DBJ1	Pgam1	PGAM1_MOUSE	Q9DBJ1_K5	TB_24H-MOCK_24H	-0.0887715	0.858307	0.917064	no	-0.0887715	0.917064	Phosphoglycerate mutase 1 (EC 5.4.2.11) (EC 5.4.2.4) (BPG-dependent PGAM 1) (Phosphoglycerate mutase isozyme B) (PGAM-B)
Q9DBJ1	Pgam1	PGAM1_MOUSE	Q9DBJ1_K254	TB_24H-MOCK_24H	-0.254045	0.504532	0.67347	no	-0.254045	0.67347	Phosphoglycerate mutase 1 (EC 5.4.2.11) (EC 5.4.2.4) (BPG-dependent PGAM 1) (Phosphoglycerate mutase isozyme B) (PGAM-B)
Q9DBP5	Cmpk1	KCY_MOUSE	Q9DBP5_K16	TB_24H-MOCK_24H	-0.505513	0.284099	0.471621	no	-0.505513	0.471621	UMP-CMP kinase (EC 2.7.4.14) (Deoxycytidylate kinase) (CK) (dCMP kinase) (Nucleoside-diphosphate kinase) (EC 2.7.4.6) (Uridine monophosphate/cytidine monophosphate kinase) (UMP/CMP kinase) (UMP/CMPK)
Q9DBR4	Apbb2	APBB2_MOUSE	Q9DBR4_K740	TB_24H-MOCK_24H	-0.809907	0.005133	0.0247628	no	-0.809907	0.0247628	Amyloid beta A4 precursor protein-binding family B member 2
Q9DCC4	Pycrl	P5CR3_MOUSE	Q9DCC4_K218	TB_24H-MOCK_24H	0.423732	0.539112	0.698345	no	0.423732	0.698345	Pyrroline-5-carboxylate reductase 3 (P5C reductase 3) (P5CR 3) (EC 1.5.1.2) (Pyrroline-5-carboxylate reductase-like protein)
Q9DCD0	Pgd	6PGD_MOUSE	Q9DCD0_K261	TB_24H-MOCK_24H	-0.511604	0.737681	0.842155	no	-0.511604	0.842155	6-phosphogluconate dehydrogenase, decarboxylating (EC 1.1.1.44)
Q9DCD0	Pgd	6PGD_MOUSE	Q9DCD0_K317	TB_24H-MOCK_24H	#NUM!		0	yes	4.62254	0.0189255	6-phosphogluconate dehydrogenase, decarboxylating (EC 1.1.1.44)
Q9DCD0	Pgd	6PGD_MOUSE	Q9DCD0_K59	TB_24H-MOCK_24H	-0.791193	0.070016	0.177211	no	-0.791193	0.177211	6-phosphogluconate dehydrogenase, decarboxylating (EC 1.1.1.44)
Q9DCD0	Pgd	6PGD_MOUSE	Q9DCD0_K303	TB_24H-MOCK_24H	0.602126	0.183433	0.354399	no	0.602126	0.354399	6-phosphogluconate dehydrogenase, decarboxylating (EC 1.1.1.44)
Q9DCD0	Pgd	6PGD_MOUSE	Q9DCD0_K294	TB_24H-MOCK_24H	0.3802	0.0299973	0.0959039	no	0.3802	0.0959039	6-phosphogluconate dehydrogenase, decarboxylating (EC 1.1.1.44)
Q9DCD0	Pgd	6PGD_MOUSE	Q9DCD0_K38	TB_24H-MOCK_24H	0.990306	0.0677912	0.17407	no	0.990306	0.17407	6-phosphogluconate dehydrogenase, decarboxylating (EC 1.1.1.44)
Q9DCD0	Pgd	6PGD_MOUSE	Q9DCD0_K48	TB_24H-MOCK_24H	-0.357096	0.651588	0.780604	no	-0.357096	0.780604	6-phosphogluconate dehydrogenase, decarboxylating (EC 1.1.1.44)
Q9DCD0	Pgd	6PGD_MOUSE	Q9DCD0_K119	TB_24H-MOCK_24H	0.89568	0.102647	0.234789	no	0.89568	0.234789	6-phosphogluconate dehydrogenase, decarboxylating (EC 1.1.1.44)
Q9DCL9	Paics	PUR6_MOUSE	Q9DCL9_K12	TB_24H-MOCK_24H	-0.953215	0.00311885	0.0171214	no	-0.953215	0.0171214	Multifunctional protein ADE2 [Includes: Phosphoribosylaminoimidazole-succinocarboxamide synthase (EC 6.3.2.6) (SAICAR synthetase); Phosphoribosylaminoimidazole carboxylase (EC 4.1.1.21) (AIR carboxylase) (AIRC)]
Q9DCL9	Paics	PUR6_MOUSE	Q9DCL9_K11	TB_24H-MOCK_24H	-0.619876	0.546056	0.703904	no	-0.619876	0.703904	Multifunctional protein ADE2 [Includes: Phosphoribosylaminoimidazole-succinocarboxamide synthase (EC 6.3.2.6) (SAICAR synthetase); Phosphoribosylaminoimidazole carboxylase (EC 4.1.1.21) (AIR carboxylase) (AIRC)]
Q9EP72	Emc7	EMC7_MOUSE	Q9EP72_K220	TB_24H-MOCK_24H	-1.23412	1.89744e-05	0.000221671	no	-1.23412	0.000221671	ER membrane protein complex subunit 7
Q9EPU0	Upf1	RENT1_MOUSE	Q9EPU0_K785	TB_24H-MOCK_24H	#NUM!		0	yes	4.35123	0.0293653	Regulator of nonsense transcripts 1 (EC 3.6.4.-) (ATP-dependent helicase RENT1) (Nonsense mRNA reducing factor 1) (NORF1) (Up-frameshift suppressor 1 homolog) (mUpf1)
Q9EPU0	Upf1	RENT1_MOUSE	Q9EPU0_K633	TB_24H-MOCK_24H	-0.63051	0.0889821	0.210803	no	-0.63051	0.210803	Regulator of nonsense transcripts 1 (EC 3.6.4.-) (ATP-dependent helicase RENT1) (Nonsense mRNA reducing factor 1) (NORF1) (Up-frameshift suppressor 1 homolog) (mUpf1)
Q9EQ32	Pik3ap1	BCAP_MOUSE	Q9EQ32_K651	TB_24H-MOCK_24H	1.47863	5.27561e-05	0.000538382	no	1.47863	0.000538382	Phosphoinositide 3-kinase adapter protein 1 (B-cell adapter for phosphoinositide 3-kinase) (B-cell phosphoinositide 3-kinase adapter protein 1)
Q9EQK5	Mvp	MVP_MOUSE	Q9EQK5_K444	TB_24H-MOCK_24H	1.74641	1.38188e-07	3.85955e-06	no	1.74641	3.85955e-06	Major vault protein (MVP)
Q9EQK5	Mvp	MVP_MOUSE	Q9EQK5_K747	TB_24H-MOCK_24H	#NUM!		0	yes	3.9617	0.0429487	Major vault protein (MVP)
Q9EQP2	Ehd4	EHD4_MOUSE	Q9EQP2_K291	TB_24H-MOCK_24H	1.22668	0.00670552	0.0301559	no	1.22668	0.0301559	EH domain-containing protein 4 (PAST homolog 2) (mPAST2)
Q9EQP2	Ehd4	EHD4_MOUSE	Q9EQP2_K296,Q9WVK4_K293,Q9QXY6_K293	TB_24H-MOCK_24H	0.479432	0.64596	0.776713	no	0.479432	0.776713	EH domain-containing protein 4 (PAST homolog 2) (mPAST2)
Q9EQP2	Ehd4	EHD4_MOUSE	Q9EQP2_K472	TB_24H-MOCK_24H	#NUM!		0	yes	4.76018	0.0222956	EH domain-containing protein 4 (PAST homolog 2) (mPAST2)
Q9EQP2	Ehd4	EHD4_MOUSE	Q9EQP2_K302,Q9WVK4_K299,Q9QXY6_K299	TB_24H-MOCK_24H	0.414247	0.0128018	0.050903	no	0.414247	0.050903	EH domain-containing protein 4 (PAST homolog 2) (mPAST2)
Q9EQP2	Ehd4	EHD4_MOUSE	Q9EQP2_K223	TB_24H-MOCK_24H	1.50052	0.0117048	0.0477515	no	1.50052	0.0477515	EH domain-containing protein 4 (PAST homolog 2) (mPAST2)
Q9EQP2	Ehd4	EHD4_MOUSE	Q9EQP2_K165	TB_24H-MOCK_24H	0.488298	0.219586	0.39952	no	0.488298	0.39952	EH domain-containing protein 4 (PAST homolog 2) (mPAST2)
Q9ER80	Rtp4	RTP4_MOUSE	Q9ER80_K191	TB_24H-MOCK_24H	0.733762	0.0607788	0.161266	no	0.733762	0.161266	Receptor-transporting protein 4 (28 kDa interferon-responsive protein)
Q9ERK9	P2ry6	P2RY6_MOUSE	Q9ERK9_K322	TB_24H-MOCK_24H	#NUM!		0	yes	-3.23839	0.0123109	P2Y purinoceptor 6 (P2Y6)
Q9ERU9	Ranbp2	RBP2_MOUSE	Q9ERU9_K396	TB_24H-MOCK_24H	1.7646	3.72983e-05	0.000398516	no	1.7646	0.000398516	E3 SUMO-protein ligase RanBP2 (EC 6.3.2.-) (Ran-binding protein 2) (RanBP2)
Q9ES28	Arhgef7	ARHG7_MOUSE	Q9ES28_K704	TB_24H-MOCK_24H	-1.56392	0.0167127	0.0609017	no	-1.56392	0.0609017	Rho guanine nucleotide exchange factor 7 (Beta-Pix) (PAK-interacting exchange factor beta) (p85SPR)
Q9ES52	Inpp5d	SHIP1_MOUSE	Q9ES52_K862	TB_24H-MOCK_24H	-0.375207	0.496606	0.669335	no	-0.375207	0.669335	Phosphatidylinositol 3,4,5-trisphosphate 5-phosphatase 1 (EC 3.1.3.86) (Inositol polyphosphate-5-phosphatase of 145 kDa) (SIP-145) (SH2 domain-containing inositol 5'-phosphatase 1) (SH2 domain-containing inositol phosphatase 1) (SHIP-1) (p150Ship)
Q9ESC8	Aff4	AFF4_MOUSE	Q9ESC8_K559	TB_24H-MOCK_24H	#NUM!		0	yes	-3.15536	0.0185309	AF4/FMR2 family member 4
Q9ET01	Pygl	PYGL_MOUSE	Q9ET01_K811	TB_24H-MOCK_24H	#NUM!		0	yes	-4.2226	0.0188773	Glycogen phosphorylase, liver form (EC 2.4.1.1)
Q9ET01	Pygl	PYGL_MOUSE	Q9ET01_K29	TB_24H-MOCK_24H	-0.254545	0.759599	0.856432	no	-0.254545	0.856432	Glycogen phosphorylase, liver form (EC 2.4.1.1)
Q9ET01	Pygl	PYGL_MOUSE	Q9ET01_K804	TB_24H-MOCK_24H	1.41952	5.79922e-05	0.000580651	no	1.41952	0.000580651	Glycogen phosphorylase, liver form (EC 2.4.1.1)
Q9ET26	Rnf114	RN114_MOUSE	Q9ET26_K103	TB_24H-MOCK_24H	0.663045	0.185875	0.356953	no	0.663045	0.356953	E3 ubiquitin-protein ligase RNF114 (EC 6.3.2.-) (RING finger protein 114) (Zinc finger protein 228) (Zinc finger protein 313)
Q9ET26	Rnf114	RN114_MOUSE	Q9ET26_K127	TB_24H-MOCK_24H	1.31027	0.000556421	0.00399019	no	1.31027	0.00399019	E3 ubiquitin-protein ligase RNF114 (EC 6.3.2.-) (RING finger protein 114) (Zinc finger protein 228) (Zinc finger protein 313)
Q9JHI9	Slc40a1	S40A1_MOUSE	Q9JHI9_K240	TB_24H-MOCK_24H	-1.82016	0.0216717	0.0743564	no	-1.82016	0.0743564	Solute carrier family 40 member 1 (Ferroportin-1) (Iron-regulated transporter 1) (Metal transporter protein 1) (MTP1)
Q9JHK5	Plek	PLEK_MOUSE	Q9JHK5_K101	TB_24H-MOCK_24H	0.372452	0.26948	0.458347	no	0.372452	0.458347	Pleckstrin
Q9JHK5	Plek	PLEK_MOUSE	Q9JHK5_K247	TB_24H-MOCK_24H	#NUM!		0	yes	4.36186	0.0121282	Pleckstrin
Q9JHK5	Plek	PLEK_MOUSE	Q9JHK5_K13	TB_24H-MOCK_24H	2.8155	1.89941e-11	2.51989e-09	no	2.8155	2.51989e-09	Pleckstrin
Q9JHK5	Plek	PLEK_MOUSE	Q9JHK5_K253	TB_24H-MOCK_24H	0.960181	0.00526605	0.0251758	no	0.960181	0.0251758	Pleckstrin
Q9JHK5	Plek	PLEK_MOUSE	Q9JHK5_K64	TB_24H-MOCK_24H	-0.306122	0.40404	0.587964	no	-0.306122	0.587964	Pleckstrin
Q9JHK5	Plek	PLEK_MOUSE	Q9JHK5_K108	TB_24H-MOCK_24H	#NUM!		0	yes	4.57352	0.0344676	Pleckstrin
Q9JHK5	Plek	PLEK_MOUSE	Q9JHK5_K340	TB_24H-MOCK_24H	1.28486	0.00764977	0.033862	no	1.28486	0.033862	Pleckstrin
Q9JHR7	Ide	IDE_MOUSE	Q9JHR7_K206	TB_24H-MOCK_24H	0.395966	0.269844	0.458475	no	0.395966	0.458475	Insulin-degrading enzyme (EC 3.4.24.56) (Insulin protease) (Insulinase) (Insulysin)
Q9JHU4	Dync1h1	DYHC1_MOUSE	Q9JHU4_K3237	TB_24H-MOCK_24H	#NUM!		0	yes	3.06193	0.0174367	Cytoplasmic dynein 1 heavy chain 1 (Cytoplasmic dynein heavy chain 1) (Dynein heavy chain, cytosolic)
Q9JHU4	Dync1h1	DYHC1_MOUSE	Q9JHU4_K4152	TB_24H-MOCK_24H	#NUM!		0	yes	2.84696	0.0112517	Cytoplasmic dynein 1 heavy chain 1 (Cytoplasmic dynein heavy chain 1) (Dynein heavy chain, cytosolic)
Q9JHU4	Dync1h1	DYHC1_MOUSE	Q9JHU4_K3755	TB_24H-MOCK_24H	1.10471	0.106514	0.240144	no	1.10471	0.240144	Cytoplasmic dynein 1 heavy chain 1 (Cytoplasmic dynein heavy chain 1) (Dynein heavy chain, cytosolic)
Q9JHU4	Dync1h1	DYHC1_MOUSE	Q9JHU4_K4404	TB_24H-MOCK_24H	#NUM!		0	yes	5.32731	0.0145296	Cytoplasmic dynein 1 heavy chain 1 (Cytoplasmic dynein heavy chain 1) (Dynein heavy chain, cytosolic)
Q9JHU4	Dync1h1	DYHC1_MOUSE	Q9JHU4_K3910	TB_24H-MOCK_24H	#NUM!		0	yes	5.63332	0.0133448	Cytoplasmic dynein 1 heavy chain 1 (Cytoplasmic dynein heavy chain 1) (Dynein heavy chain, cytosolic)
Q9JHU4	Dync1h1	DYHC1_MOUSE	Q9JHU4_K632	TB_24H-MOCK_24H	#NUM!		0	yes	4.15814	0.0420336	Cytoplasmic dynein 1 heavy chain 1 (Cytoplasmic dynein heavy chain 1) (Dynein heavy chain, cytosolic)
Q9JHU4	Dync1h1	DYHC1_MOUSE	Q9JHU4_K650	TB_24H-MOCK_24H	0.244039	0.504234	0.67347	no	0.244039	0.67347	Cytoplasmic dynein 1 heavy chain 1 (Cytoplasmic dynein heavy chain 1) (Dynein heavy chain, cytosolic)
Q9JI78	Ngly1	NGLY1_MOUSE	Q9JI78_K130	TB_24H-MOCK_24H	-0.4856	0.109208	0.241807	no	-0.4856	0.241807	Peptide-N(4)-(N-acetyl-beta-glucosaminyl)asparagine amidase (PNGase) (mPNGase) (EC 3.5.1.52) (N-glycanase 1) (Peptide:N-glycanase)
Q9JI78	Ngly1	NGLY1_MOUSE	Q9JI78_K201	TB_24H-MOCK_24H	-0.232139	0.146459	0.30281	no	-0.232139	0.30281	Peptide-N(4)-(N-acetyl-beta-glucosaminyl)asparagine amidase (PNGase) (mPNGase) (EC 3.5.1.52) (N-glycanase 1) (Peptide:N-glycanase)
Q9JI78	Ngly1	NGLY1_MOUSE	Q9JI78_K416	TB_24H-MOCK_24H	-0.789858	0.0131094	0.0515586	no	-0.789858	0.0515586	Peptide-N(4)-(N-acetyl-beta-glucosaminyl)asparagine amidase (PNGase) (mPNGase) (EC 3.5.1.52) (N-glycanase 1) (Peptide:N-glycanase)
Q9JIA7	Sphk2	SPHK2_MOUSE	Q9JIA7_K363	TB_24H-MOCK_24H	0.26236	0.674715	0.796253	no	0.26236	0.796253	Sphingosine kinase 2 (SK 2) (SPK 2) (EC 2.7.1.91)
Q9JIB3	Naip7	BIR1G_MOUSE	Q9QUK4_K1149,Q9JIB3_K1105,Q9R016_K1105,Q9QWK5_K1105,Q9JIB6_K1105	TB_24H-MOCK_24H	0.329078	0.635077	0.770612	no	0.329078	0.770612	Baculoviral IAP repeat-containing protein 1g (Neuronal apoptosis inhibitory protein 7)
Q9JII6	Akr1a1	AK1A1_MOUSE	Q9JII6_K127	TB_24H-MOCK_24H	0.052174	0.967914	0.982102	no	0.052174	0.982102	Alcohol dehydrogenase [NADP(+)] (EC 1.1.1.2) (Aldehyde reductase) (Aldo-keto reductase family 1 member A1)
Q9JII6	Akr1a1	AK1A1_MOUSE	Q9JII6_K34	TB_24H-MOCK_24H	0.31148	0.53536	0.694615	no	0.31148	0.694615	Alcohol dehydrogenase [NADP(+)] (EC 1.1.1.2) (Aldehyde reductase) (Aldo-keto reductase family 1 member A1)
Q9JII6	Akr1a1	AK1A1_MOUSE	Q9JII6_K80	TB_24H-MOCK_24H	#NUM!		0	yes	4.17209	0.0328672	Alcohol dehydrogenase [NADP(+)] (EC 1.1.1.2) (Aldehyde reductase) (Aldo-keto reductase family 1 member A1)
Q9JII6	Akr1a1	AK1A1_MOUSE	Q9JII6_K157	TB_24H-MOCK_24H	1.41673	2.03828e-05	0.000233449	no	1.41673	0.000233449	Alcohol dehydrogenase [NADP(+)] (EC 1.1.1.2) (Aldehyde reductase) (Aldo-keto reductase family 1 member A1)
Q9JII6	Akr1a1	AK1A1_MOUSE	Q9JII6_K23	TB_24H-MOCK_24H	2.52508	0.000561956	0.0039939	no	2.52508	0.0039939	Alcohol dehydrogenase [NADP(+)] (EC 1.1.1.2) (Aldehyde reductase) (Aldo-keto reductase family 1 member A1)
Q9JII6	Akr1a1	AK1A1_MOUSE	Q9JII6_K153	TB_24H-MOCK_24H	-1.13052	0.141234	0.295848	no	-1.13052	0.295848	Alcohol dehydrogenase [NADP(+)] (EC 1.1.1.2) (Aldehyde reductase) (Aldo-keto reductase family 1 member A1)
Q9JII6	Akr1a1	AK1A1_MOUSE	Q9JII6_K30	TB_24H-MOCK_24H	1.57149	0.000351272	0.00272793	no	1.57149	0.00272793	Alcohol dehydrogenase [NADP(+)] (EC 1.1.1.2) (Aldehyde reductase) (Aldo-keto reductase family 1 member A1)
Q9JII6	Akr1a1	AK1A1_MOUSE	Q9JII6_K263	TB_24H-MOCK_24H	-0.20462	0.777792	0.863008	no	-0.20462	0.863008	Alcohol dehydrogenase [NADP(+)] (EC 1.1.1.2) (Aldehyde reductase) (Aldo-keto reductase family 1 member A1)
Q9JII6	Akr1a1	AK1A1_MOUSE	Q9JII6_K85	TB_24H-MOCK_24H	0.943273	0.0713195	0.179086	no	0.943273	0.179086	Alcohol dehydrogenase [NADP(+)] (EC 1.1.1.2) (Aldehyde reductase) (Aldo-keto reductase family 1 member A1)
Q9JJ28	Flii	FLII_MOUSE	Q9JJ28_K752	TB_24H-MOCK_24H	0.729192	0.221006	0.40064	no	0.729192	0.40064	Protein flightless-1 homolog
Q9JJ28	Flii	FLII_MOUSE	Q9JJ28_K349	TB_24H-MOCK_24H	0.578502	0.00167897	0.0101224	no	0.578502	0.0101224	Protein flightless-1 homolog
Q9JJ28	Flii	FLII_MOUSE	Q9JJ28_K832	TB_24H-MOCK_24H	#NUM!		0	yes	3.40514	0.0154831	Protein flightless-1 homolog
Q9JK23	Psmg1	PSMG1_MOUSE	Q9JK23_K11	TB_24H-MOCK_24H	-0.713752	0.0706637	0.178001	no	-0.713752	0.178001	Proteasome assembly chaperone 1 (Down syndrome critical region protein 2 homolog)
Q9JKF1	Iqgap1	IQGA1_MOUSE	Q9JKF1_K1464	TB_24H-MOCK_24H	0.584352	0.0573915	0.154337	no	0.584352	0.154337	Ras GTPase-activating-like protein IQGAP1
Q9JKF1	Iqgap1	IQGA1_MOUSE	Q9JKF1_K1532	TB_24H-MOCK_24H	-0.0166563	0.978498	0.986554	no	-0.0166563	0.986554	Ras GTPase-activating-like protein IQGAP1
Q9JKF1	Iqgap1	IQGA1_MOUSE	Q9JKF1_K924	TB_24H-MOCK_24H	0.782426	0.122442	0.264302	no	0.782426	0.264302	Ras GTPase-activating-like protein IQGAP1
Q9JKF1	Iqgap1	IQGA1_MOUSE	Q9JKF1_K936	TB_24H-MOCK_24H	0.143974	0.830661	0.899559	no	0.143974	0.899559	Ras GTPase-activating-like protein IQGAP1
Q9JKF1	Iqgap1	IQGA1_MOUSE	Q9JKF1_K88	TB_24H-MOCK_24H	0.258335	0.592121	0.736451	no	0.258335	0.736451	Ras GTPase-activating-like protein IQGAP1
Q9JKF1	Iqgap1	IQGA1_MOUSE	Q9JKF1_K1528	TB_24H-MOCK_24H	-0.174018	0.774908	0.861425	no	-0.174018	0.861425	Ras GTPase-activating-like protein IQGAP1
Q9JKF1	Iqgap1	IQGA1_MOUSE	Q9JKF1_K1543	TB_24H-MOCK_24H	-0.655659	0.0215845	0.0742171	no	-0.655659	0.0742171	Ras GTPase-activating-like protein IQGAP1
Q9JKF1	Iqgap1	IQGA1_MOUSE	Q9JKF1_K1433	TB_24H-MOCK_24H	-0.264814	0.831188	0.899559	no	-0.264814	0.899559	Ras GTPase-activating-like protein IQGAP1
Q9JKF1	Iqgap1	IQGA1_MOUSE	Q9JKF1_K1088	TB_24H-MOCK_24H	0.768459	0.10309	0.234964	no	0.768459	0.234964	Ras GTPase-activating-like protein IQGAP1
Q9JKF1	Iqgap1	IQGA1_MOUSE	Q9JKF1_K1096	TB_24H-MOCK_24H	#NUM!		0	yes	5.61828	0.012962	Ras GTPase-activating-like protein IQGAP1
Q9JKF1	Iqgap1	IQGA1_MOUSE	Q9JKF1_K1541	TB_24H-MOCK_24H	-0.841793	0.0070892	0.0316135	no	-0.841793	0.0316135	Ras GTPase-activating-like protein IQGAP1
Q9JKF1	Iqgap1	IQGA1_MOUSE	Q9JKF1_K1389	TB_24H-MOCK_24H	0.46003	0.320716	0.509053	no	0.46003	0.509053	Ras GTPase-activating-like protein IQGAP1
Q9JKV1	Adrm1	ADRM1_MOUSE	Q9JKV1_K34	TB_24H-MOCK_24H	-0.141291	0.826294	0.898538	no	-0.141291	0.898538	Proteasomal ubiquitin receptor ADRM1 (110 kDa cell membrane glycoprotein) (Gp110) (Adhesion-regulating molecule 1) (ARM-1) (Rpn13 homolog)
Q9JKV1	Adrm1	ADRM1_MOUSE	Q9JKV1_K21	TB_24H-MOCK_24H	2.19319	0.0208896	0.0722666	no	2.19319	0.0722666	Proteasomal ubiquitin receptor ADRM1 (110 kDa cell membrane glycoprotein) (Gp110) (Adhesion-regulating molecule 1) (ARM-1) (Rpn13 homolog)
Q9JL15	Lgals8	LEG8_MOUSE	Q9JL15_K56	TB_24H-MOCK_24H	#NUM!		0	yes	2.81986	0.0479426	Galectin-8 (Gal-8) (LGALS-8)
Q9JL15	Lgals8	LEG8_MOUSE	Q9JL15_K221	TB_24H-MOCK_24H	3.2435	2.7045e-13	1.43519e-10	no	3.2435	1.43519e-10	Galectin-8 (Gal-8) (LGALS-8)
Q9JL26	Fmnl1	FMNL1_MOUSE	Q9JL26_K691	TB_24H-MOCK_24H	-0.501467	0.329553	0.518873	no	-0.501467	0.518873	Formin-like protein 1 (Formin-related protein)
Q9JL26	Fmnl1	FMNL1_MOUSE	Q9JL26_K701	TB_24H-MOCK_24H	-0.989647	0.477494	0.657837	no	-0.989647	0.657837	Formin-like protein 1 (Formin-related protein)
Q9JLJ5	Elovl1	ELOV1_MOUSE	Q9JLJ5_K275	TB_24H-MOCK_24H	#NUM!		0	yes	3.90864	0.0477019	Elongation of very long chain fatty acids protein 1 (EC 2.3.1.199) (3-keto acyl-CoA synthase Elovl1) (ELOVL fatty acid elongase 1) (ELOVL FA elongase 1) (Very long chain 3-ketoacyl-CoA synthase 1) (Very long chain 3-oxoacyl-CoA synthase 1)
Q9JM13	Rabgef1	RABX5_MOUSE	Q9JM13_K103	TB_24H-MOCK_24H	-0.267744	0.699168	0.813735	no	-0.267744	0.813735	Rab5 GDP/GTP exchange factor (Rabex-5)
Q9JM76	Arpc3	ARPC3_MOUSE	Q9JM76_K171	TB_24H-MOCK_24H	0.130772	0.727871	0.834972	no	0.130772	0.834972	Actin-related protein 2/3 complex subunit 3 (Arp2/3 complex 21 kDa subunit) (p21-ARC)
Q9JM76	Arpc3	ARPC3_MOUSE	Q9JM76_K29	TB_24H-MOCK_24H	-0.183798	0.672022	0.794253	no	-0.183798	0.794253	Actin-related protein 2/3 complex subunit 3 (Arp2/3 complex 21 kDa subunit) (p21-ARC)
Q9JM96	Cdc42ep4	BORG4_MOUSE	Q9JM96_K5	TB_24H-MOCK_24H	0.923925	0.0690972	0.17669	no	0.923925	0.17669	Cdc42 effector protein 4 (Binder of Rho GTPases 4)
Q9JMA1	Usp14	UBP14_MOUSE	Q9JMA1_K313	TB_24H-MOCK_24H	#NUM!		0	yes	3.81754	0.0439733	Ubiquitin carboxyl-terminal hydrolase 14 (EC 3.4.19.12) (Deubiquitinating enzyme 14) (Ubiquitin thioesterase 14) (Ubiquitin-specific-processing protease 14)
Q9JMA1	Usp14	UBP14_MOUSE	Q9JMA1_K316	TB_24H-MOCK_24H	0.313876	0.0372016	0.113241	no	0.313876	0.113241	Ubiquitin carboxyl-terminal hydrolase 14 (EC 3.4.19.12) (Deubiquitinating enzyme 14) (Ubiquitin thioesterase 14) (Ubiquitin-specific-processing protease 14)
Q9JMA1	Usp14	UBP14_MOUSE	Q9JMA1_K300	TB_24H-MOCK_24H	0.126869	0.770418	0.860705	no	0.126869	0.860705	Ubiquitin carboxyl-terminal hydrolase 14 (EC 3.4.19.12) (Deubiquitinating enzyme 14) (Ubiquitin thioesterase 14) (Ubiquitin-specific-processing protease 14)
Q9JMG3	Tmub1	TMUB1_MOUSE	Q9JMG3_K107	TB_24H-MOCK_24H	-0.266529	0.626193	0.763907	no	-0.266529	0.763907	Transmembrane and ubiquitin-like domain-containing protein 1 (Hepatocyte odd protein shuttling protein) [Cleaved into: iHOPS]
Q9JMH6	Txnrd1	TRXR1_MOUSE	Q9JMH6_K262	TB_24H-MOCK_24H	-1.04712	0.0360628	0.110646	no	-1.04712	0.110646	Thioredoxin reductase 1, cytoplasmic (TR) (EC 1.8.1.9) (Thioredoxin reductase TR1)
Q9QUH0	Glrx	GLRX1_MOUSE	Q9QUH0_K100	TB_24H-MOCK_24H	1.14579	0.0256954	0.0845188	no	1.14579	0.0845188	Glutaredoxin-1 (Thioltransferase-1) (TTase-1)
Q9QUH0	Glrx	GLRX1_MOUSE	Q9QUH0_K9	TB_24H-MOCK_24H	0.649265	0.107888	0.241415	no	0.649265	0.241415	Glutaredoxin-1 (Thioltransferase-1) (TTase-1)
Q9QUH0	Glrx	GLRX1_MOUSE	Q9QUH0_K20	TB_24H-MOCK_24H	2.15901	9.37207e-08	2.98407e-06	no	2.15901	2.98407e-06	Glutaredoxin-1 (Thioltransferase-1) (TTase-1)
Q9QUI0	Rhoa	RHOA_MOUSE	Q9QUI0_K162	TB_24H-MOCK_24H	-0.411318	0.275117	0.461038	no	-0.411318	0.461038	Transforming protein RhoA
Q9QUJ7	Acsl4	ACSL4_MOUSE	Q9QUJ7_K622	TB_24H-MOCK_24H	0.397579	0.0379656	0.114472	no	0.397579	0.114472	Long-chain-fatty-acid--CoA ligase 4 (EC 6.2.1.3) (Long-chain acyl-CoA synthetase 4) (LACS 4) (mACS4)
Q9QUJ7	Acsl4	ACSL4_MOUSE	Q9QUJ7_K661	TB_24H-MOCK_24H	-0.462899	0.192295	0.36488	no	-0.462899	0.36488	Long-chain-fatty-acid--CoA ligase 4 (EC 6.2.1.3) (Long-chain acyl-CoA synthetase 4) (LACS 4) (mACS4)
Q9QUJ7	Acsl4	ACSL4_MOUSE	Q9QUJ7_K49	TB_24H-MOCK_24H	-1.45837	0.00329628	0.0177405	no	-1.45837	0.0177405	Long-chain-fatty-acid--CoA ligase 4 (EC 6.2.1.3) (Long-chain acyl-CoA synthetase 4) (LACS 4) (mACS4)
Q9QUJ7	Acsl4	ACSL4_MOUSE	Q9QUJ7_K621	TB_24H-MOCK_24H	0.358085	0.15657	0.319155	no	0.358085	0.319155	Long-chain-fatty-acid--CoA ligase 4 (EC 6.2.1.3) (Long-chain acyl-CoA synthetase 4) (LACS 4) (mACS4)
Q9QUM9	Psma6	PSA6_MOUSE	Q9QUM9_K171	TB_24H-MOCK_24H	0.642403	0.377776	0.564184	no	0.642403	0.564184	Proteasome subunit alpha type-6 (EC 3.4.25.1) (Macropain iota chain) (Multicatalytic endopeptidase complex iota chain) (Proteasome iota chain)
Q9QUM9	Psma6	PSA6_MOUSE	Q9QUM9_K45	TB_24H-MOCK_24H	0.352494	0.195306	0.368835	no	0.352494	0.368835	Proteasome subunit alpha type-6 (EC 3.4.25.1) (Macropain iota chain) (Multicatalytic endopeptidase complex iota chain) (Proteasome iota chain)
Q9QUM9	Psma6	PSA6_MOUSE	Q9QUM9_K54	TB_24H-MOCK_24H	#NUM!		0	yes	6.12871	0.041599	Proteasome subunit alpha type-6 (EC 3.4.25.1) (Macropain iota chain) (Multicatalytic endopeptidase complex iota chain) (Proteasome iota chain)
Q9QX47	Son	SON_MOUSE	Q9QX47_K16	TB_24H-MOCK_24H	-0.923026	0.00272858	0.015319	no	-0.923026	0.015319	Protein SON (Negative regulatory element-binding protein) (NRE-binding protein)
Q9QXM0	Abhd2	ABHD2_MOUSE	Q9QXM0_K57	TB_24H-MOCK_24H	0.505617	0.024427	0.0816921	no	0.505617	0.0816921	Monoacylglycerol lipase ABHD2 (EC 3.1.1.23) (2-arachidonoylglycerol hydrolase) (Abhydrolase domain-containing protein 2) (Lung alpha/beta hydrolase 2) (MmLABH2)
Q9QXS1	Plec	PLEC_MOUSE	Q9QXS1_K2853	TB_24H-MOCK_24H	0.723625	0.289459	0.479021	no	0.723625	0.479021	Plectin (PCN) (PLTN) (Plectin-1) (Plectin-6)
Q9QXS1	Plec	PLEC_MOUSE	Q9QXS1_K1258,Q9QXS1_K1274	TB_24H-MOCK_24H	1.05317	0.0562427	0.152419	no	1.05317	0.152419	Plectin (PCN) (PLTN) (Plectin-1) (Plectin-6)
Q9QXS1	Plec	PLEC_MOUSE	Q9QXS1_K1726	TB_24H-MOCK_24H	-0.687905	0.0394009	0.117906	no	-0.687905	0.117906	Plectin (PCN) (PLTN) (Plectin-1) (Plectin-6)
Q9QXS1	Plec	PLEC_MOUSE	Q9QXS1_K3476	TB_24H-MOCK_24H	-0.113564	0.922652	0.952895	no	-0.113564	0.952895	Plectin (PCN) (PLTN) (Plectin-1) (Plectin-6)
Q9QY73	Tmem59	TMM59_MOUSE	Q9QY73_K315	TB_24H-MOCK_24H	-0.73921	0.0266564	0.087319	no	-0.73921	0.087319	Transmembrane protein 59 (Thymic dendritic cell-derived factor 1)
Q9QYB1	Clic4	CLIC4_MOUSE	Q9QYB1_K130	TB_24H-MOCK_24H	0.315228	0.514433	0.679085	no	0.315228	0.679085	Chloride intracellular channel protein 4 (mc3s5/mtCLIC)
Q9QYB1	Clic4	CLIC4_MOUSE	Q9QYB1_K203	TB_24H-MOCK_24H	1.26413	0.182904	0.354238	no	1.26413	0.354238	Chloride intracellular channel protein 4 (mc3s5/mtCLIC)
Q9QYB1	Clic4	CLIC4_MOUSE	Q9QYB1_K106	TB_24H-MOCK_24H	1.41226	0.0187769	0.0668099	no	1.41226	0.0668099	Chloride intracellular channel protein 4 (mc3s5/mtCLIC)
Q9QYB1	Clic4	CLIC4_MOUSE	Q9QYB1_K199	TB_24H-MOCK_24H	0.963849	0.292971	0.480866	no	0.963849	0.480866	Chloride intracellular channel protein 4 (mc3s5/mtCLIC)
Q9QYF1	Rdh11	RDH11_MOUSE	Q9QYF1_K102	TB_24H-MOCK_24H	-0.312632	0.431091	0.613862	no	-0.312632	0.613862	Retinol dehydrogenase 11 (EC 1.1.1.300) (Androgen-regulated short-chain dehydrogenase/reductase 1) (Cell line MC/9.IL4-derived protein 1) (M42C60) (Prostate short-chain dehydrogenase/reductase 1) (Retinal reductase 1) (RalR1) (Short-chain aldehyde dehydrogenase) (SCALD)
Q9QYJ0	Dnaja2	DNJA2_MOUSE	Q9QYJ0_K158	TB_24H-MOCK_24H	1.44694	6.76929e-08	2.29292e-06	no	1.44694	2.29292e-06	DnaJ homolog subfamily A member 2 (mDj3)
Q9QYS9	Qki	QKI_MOUSE	Q9QYS9_K8,Q9QYS9_K10	TB_24H-MOCK_24H	#NUM!		0	yes	-2.19543	0.0451299	Protein quaking (MqkI) (qkI)
Q9QZ06	Tollip	TOLIP_MOUSE	Q9QZ06_K63	TB_24H-MOCK_24H	1.08784	0.00415412	0.0209948	no	1.08784	0.0209948	Toll-interacting protein
Q9QZ06	Tollip	TOLIP_MOUSE	Q9QZ06_K66	TB_24H-MOCK_24H	#NUM!		0	yes	5.13716	0.0456407	Toll-interacting protein
Q9QZE7	Tsnax	TSNAX_MOUSE	Q9QZE7_K68	TB_24H-MOCK_24H	0.610495	0.102452	0.234681	no	0.610495	0.234681	Translin-associated protein X (Translin-associated factor X)
Q9QZQ8	H2afy	H2AY_MOUSE	Q9QZQ8_K117	TB_24H-MOCK_24H	0.151732	0.856947	0.916841	no	0.151732	0.916841	Core histone macro-H2A.1 (Histone macroH2A1) (mH2A1) (H2A.y) (H2A/y)
Q9QZQ8	H2afy	H2AY_MOUSE	Q9QZQ8_K116	TB_24H-MOCK_24H	0.22631	0.774045	0.861425	no	0.22631	0.861425	Core histone macro-H2A.1 (Histone macroH2A1) (mH2A1) (H2A.y) (H2A/y)
Q9QZQ8	H2afy	H2AY_MOUSE	Q9QZQ8_K123	TB_24H-MOCK_24H	-1.53129	0.000187987	0.00162649	no	-1.53129	0.00162649	Core histone macro-H2A.1 (Histone macroH2A1) (mH2A1) (H2A.y) (H2A/y)
Q9QZQ8	H2afy	H2AY_MOUSE	Q9QZQ8_K295	TB_24H-MOCK_24H	-0.137412	0.598341	0.740139	no	-0.137412	0.740139	Core histone macro-H2A.1 (Histone macroH2A1) (mH2A1) (H2A.y) (H2A/y)
Q9R062	Gyg1	GLYG_MOUSE	Q9R062_K209	TB_24H-MOCK_24H	#NUM!		0	yes	4.71722	0.0109377	Glycogenin-1 (GN-1) (GN1) (EC 2.4.1.186)
Q9R062	Gyg1	GLYG_MOUSE	Q9R062_K27	TB_24H-MOCK_24H	0.446194	0.311964	0.50217	no	0.446194	0.50217	Glycogenin-1 (GN-1) (GN1) (EC 2.4.1.186)
Q9R0L6	Pcm1	PCM1_MOUSE	Q9R0L6_K259	TB_24H-MOCK_24H	-1.61139	1.82732e-05	0.000217096	no	-1.61139	0.000217096	Pericentriolar material 1 protein (PCM-1) (mPCM-1)
Q9R0L6	Pcm1	PCM1_MOUSE	Q9R0L6_K727	TB_24H-MOCK_24H	#NUM!		0	yes	-3.05674	0.0391589	Pericentriolar material 1 protein (PCM-1) (mPCM-1)
Q9R0L6	Pcm1	PCM1_MOUSE	Q9R0L6_K784	TB_24H-MOCK_24H	-1.38457	0.0132093	0.0517959	no	-1.38457	0.0517959	Pericentriolar material 1 protein (PCM-1) (mPCM-1)
Q9R0L6	Pcm1	PCM1_MOUSE	Q9R0L6_K766	TB_24H-MOCK_24H	-1.66774	4.99789e-09	2.34019e-07	no	-1.66774	2.34019e-07	Pericentriolar material 1 protein (PCM-1) (mPCM-1)
Q9R0P3	Esd	ESTD_MOUSE	Q9R0P3_K4	TB_24H-MOCK_24H	0.772239	5.85671e-06	8.3999e-05	no	0.772239	8.3999e-05	S-formylglutathione hydrolase (FGH) (EC 3.1.2.12) (Esterase 10) (Esterase D) (Sid 478)
Q9R0P3	Esd	ESTD_MOUSE	Q9R0P3_K185	TB_24H-MOCK_24H	0.503633	0.399233	0.585248	no	0.503633	0.585248	S-formylglutathione hydrolase (FGH) (EC 3.1.2.12) (Esterase 10) (Esterase D) (Sid 478)
Q9R0P3	Esd	ESTD_MOUSE	Q9R0P3_K17	TB_24H-MOCK_24H	0.710581	0.069948	0.177211	no	0.710581	0.177211	S-formylglutathione hydrolase (FGH) (EC 3.1.2.12) (Esterase 10) (Esterase D) (Sid 478)
Q9R0P3	Esd	ESTD_MOUSE	Q9R0P3_K186	TB_24H-MOCK_24H	#NUM!		0	yes	3.87822	0.0399628	S-formylglutathione hydrolase (FGH) (EC 3.1.2.12) (Esterase 10) (Esterase D) (Sid 478)
Q9R0P5	Dstn	DEST_MOUSE	Q9R0P5_K19	TB_24H-MOCK_24H	-0.83301	0.00443248	0.0220516	no	-0.83301	0.0220516	Destrin (Actin-depolymerizing factor) (ADF) (Sid 23)
Q9R0Q8	Clec4e	CLC4E_MOUSE	Q9R0Q8_K5	TB_24H-MOCK_24H	4.18458	3.93245e-09	1.89711e-07	no	4.18458	1.89711e-07	C-type lectin domain family 4 member E (C-type lectin superfamily member 9) (Macrophage-inducible C-type lectin)
Q9R1P4	Psma1	PSA1_MOUSE	Q9R1P4_K115	TB_24H-MOCK_24H	-0.463953	0.0460901	0.132686	no	-0.463953	0.132686	Proteasome subunit alpha type-1 (EC 3.4.25.1) (Macropain subunit C2) (Multicatalytic endopeptidase complex subunit C2) (Proteasome component C2) (Proteasome nu chain)
Q9R1P4	Psma1	PSA1_MOUSE	Q9R1P4_K39	TB_24H-MOCK_24H	#NUM!		0	yes	6.33951	0.0125864	Proteasome subunit alpha type-1 (EC 3.4.25.1) (Macropain subunit C2) (Multicatalytic endopeptidase complex subunit C2) (Proteasome component C2) (Proteasome nu chain)
Q9R1P4	Psma1	PSA1_MOUSE	Q9R1P4_K61	TB_24H-MOCK_24H	1.00804	0.0445705	0.129719	no	1.00804	0.129719	Proteasome subunit alpha type-1 (EC 3.4.25.1) (Macropain subunit C2) (Multicatalytic endopeptidase complex subunit C2) (Proteasome component C2) (Proteasome nu chain)
Q9R1P4	Psma1	PSA1_MOUSE	Q9R1P4_K41	TB_24H-MOCK_24H	#NUM!		0	yes	4.18135	0.0331567	Proteasome subunit alpha type-1 (EC 3.4.25.1) (Macropain subunit C2) (Multicatalytic endopeptidase complex subunit C2) (Proteasome component C2) (Proteasome nu chain)
Q9R233	Tapbp	TPSN_MOUSE	Q9R233_K107	TB_24H-MOCK_24H	0.592371	0.135354	0.288853	no	0.592371	0.288853	Tapasin (TPN) (TPSN) (TAP-associated protein) (TAP-binding protein)
Q9R233	Tapbp	TPSN_MOUSE	Q9R233_K216	TB_24H-MOCK_24H	0.655146	0.0374304	0.113451	no	0.655146	0.113451	Tapasin (TPN) (TPSN) (TAP-associated protein) (TAP-binding protein)
Q9WTI7	Myo1c	MYO1C_MOUSE	Q9WTI7_K188	TB_24H-MOCK_24H	1.38785	0.0366023	0.112059	no	1.38785	0.112059	Unconventional myosin-Ic (Myosin I beta) (MMI-beta) (MMIb)
Q9WTI7	Myo1c	MYO1C_MOUSE	Q9WTI7_K151	TB_24H-MOCK_24H	0.740882	0.0374844	0.113451	no	0.740882	0.113451	Unconventional myosin-Ic (Myosin I beta) (MMI-beta) (MMIb)
Q9WTI7	Myo1c	MYO1C_MOUSE	Q9WTI7_K146	TB_24H-MOCK_24H	0.904354	0.282108	0.469787	no	0.904354	0.469787	Unconventional myosin-Ic (Myosin I beta) (MMI-beta) (MMIb)
Q9WTX6	Cul1	CUL1_MOUSE	Q9WTX6_K468	TB_24H-MOCK_24H	#NUM!		0	yes	4.20754	0.0168523	Cullin-1 (CUL-1)
Q9WU78	Pdcd6ip	PDC6I_MOUSE	Q9WU78_K640	TB_24H-MOCK_24H	0.94456	0.0977066	0.226089	no	0.94456	0.226089	Programmed cell death 6-interacting protein (ALG-2-interacting protein 1) (ALG-2-interacting protein X) (E2F1-inducible protein) (Eig2)
Q9WU78	Pdcd6ip	PDC6I_MOUSE	Q9WU78_K638	TB_24H-MOCK_24H	2.97666	0.00831159	0.0358652	no	2.97666	0.0358652	Programmed cell death 6-interacting protein (ALG-2-interacting protein 1) (ALG-2-interacting protein X) (E2F1-inducible protein) (Eig2)
Q9WU81	Slc37a2	G6PT3_MOUSE	Q9WU81_K499	TB_24H-MOCK_24H	-1.94413	5.93321e-06	8.43364e-05	no	-1.94413	8.43364e-05	Glucose-6-phosphate exchanger SLC37A2 (Solute carrier family 37 member 2) (cAMP-inducible protein 2)
Q9WUA2	Farsb	SYFB_MOUSE	Q9WUA2_K97	TB_24H-MOCK_24H	0.952861	0.00800326	0.0350997	no	0.952861	0.0350997	Phenylalanine--tRNA ligase beta subunit (EC 6.1.1.20) (Phenylalanyl-tRNA synthetase beta subunit) (PheRS)
Q9WUA2	Farsb	SYFB_MOUSE	Q9WUA2_K7	TB_24H-MOCK_24H	1.01317	0.0152805	0.0572391	no	1.01317	0.0572391	Phenylalanine--tRNA ligase beta subunit (EC 6.1.1.20) (Phenylalanyl-tRNA synthetase beta subunit) (PheRS)
Q9WUA3	Pfkp	PFKAP_MOUSE	Q9WUA3_K758	TB_24H-MOCK_24H	-0.469356	0.336699	0.523973	no	-0.469356	0.523973	ATP-dependent 6-phosphofructokinase, platelet type (ATP-PFK) (PFK-P) (EC 2.7.1.11) (6-phosphofructokinase type C) (Phosphofructo-1-kinase isozyme C) (PFK-C) (Phosphohexokinase)
Q9WUA3	Pfkp	PFKAP_MOUSE	Q9WUA3_K691	TB_24H-MOCK_24H	0.0468898	0.868845	0.925218	no	0.0468898	0.925218	ATP-dependent 6-phosphofructokinase, platelet type (ATP-PFK) (PFK-P) (EC 2.7.1.11) (6-phosphofructokinase type C) (Phosphofructo-1-kinase isozyme C) (PFK-C) (Phosphohexokinase)
Q9WUA3	Pfkp	PFKAP_MOUSE	Q9WUA3_K108	TB_24H-MOCK_24H	1.34303	4.28667e-05	0.000446037	no	1.34303	0.000446037	ATP-dependent 6-phosphofructokinase, platelet type (ATP-PFK) (PFK-P) (EC 2.7.1.11) (6-phosphofructokinase type C) (Phosphofructo-1-kinase isozyme C) (PFK-C) (Phosphohexokinase)
Q9WUM3	Coro1b	COR1B_MOUSE	Q9WUM3_K233	TB_24H-MOCK_24H	#NUM!		0	yes	6.34606	0.01687	Coronin-1B (Coronin-2)
Q9WUM4	Coro1c	COR1C_MOUSE	Q9WUM4_K194	TB_24H-MOCK_24H	-0.0516663	0.94212	0.964537	no	-0.0516663	0.964537	Coronin-1C (Coronin-3)
Q9WUM4	Coro1c	COR1C_MOUSE	Q9WUM4_K197	TB_24H-MOCK_24H	-1.98007	0.293136	0.480866	no	-1.98007	0.480866	Coronin-1C (Coronin-3)
Q9WV32	Arpc1b	ARC1B_MOUSE	Q9WV32_K339	TB_24H-MOCK_24H	-2.80762	0.0367281	0.112065	no	-2.80762	0.112065	Actin-related protein 2/3 complex subunit 1B (Arp2/3 complex 41 kDa subunit) (p41-ARC)
Q9WV32	Arpc1b	ARC1B_MOUSE	Q9WV32_K341	TB_24H-MOCK_24H	-0.424597	0.115041	0.251919	no	-0.424597	0.251919	Actin-related protein 2/3 complex subunit 1B (Arp2/3 complex 41 kDa subunit) (p41-ARC)
Q9WV32	Arpc1b	ARC1B_MOUSE	Q9WV32_K367	TB_24H-MOCK_24H	-0.794208	0.0450925	0.130999	no	-0.794208	0.130999	Actin-related protein 2/3 complex subunit 1B (Arp2/3 complex 41 kDa subunit) (p41-ARC)
Q9WVA4	Tagln2	TAGL2_MOUSE	Q9WVA4_K78	TB_24H-MOCK_24H	#NUM!		0	yes	4.20727	0.0374971	Transgelin-2 (SM22-beta)
Q9WVA4	Tagln2	TAGL2_MOUSE	Q9WVA4_K57	TB_24H-MOCK_24H	-0.0831397	0.890863	0.936141	no	-0.0831397	0.936141	Transgelin-2 (SM22-beta)
Q9WVA4	Tagln2	TAGL2_MOUSE	Q9WVA4_K79	TB_24H-MOCK_24H	0.295539	0.137907	0.291548	no	0.295539	0.291548	Transgelin-2 (SM22-beta)
Q9WVJ2	Psmd13	PSD13_MOUSE	Q9WVJ2_K115	TB_24H-MOCK_24H	0.791092	0.148316	0.305064	no	0.791092	0.305064	26S proteasome non-ATPase regulatory subunit 13 (26S proteasome regulatory subunit RPN9) (26S proteasome regulatory subunit S11) (26S proteasome regulatory subunit p40.5)
Q9WVJ2	Psmd13	PSD13_MOUSE	Q9WVJ2_K122	TB_24H-MOCK_24H	#NUM!		0	yes	-4.89649	0.0323529	26S proteasome non-ATPase regulatory subunit 13 (26S proteasome regulatory subunit RPN9) (26S proteasome regulatory subunit S11) (26S proteasome regulatory subunit p40.5)
Q9WVK4	Ehd1	EHD1_MOUSE	Q9WVK4_K375	TB_24H-MOCK_24H	#NUM!		0	yes	5.96177	0.0488692	EH domain-containing protein 1 (PAST homolog 1) (mPAST1)
Q9WVM1	Racgap1	RGAP1_MOUSE	Q9WVM1_K293	TB_24H-MOCK_24H	#NUM!		0	yes	-5.20636	0.0309101	Rac GTPase-activating protein 1 (Male germ cell RacGap) (MgcRacGAP)
Q9Z0E6	Gbp2	GBP2_MOUSE	Q9Z0E6_K578	TB_24H-MOCK_24H	#NUM!		0	yes	5.95158	0.034456	Guanylate-binding protein 1 (EC 3.6.5.-) (GTP-binding protein 2) (GBP-2) (mGBP-2) (mGBP2) (Guanine nucleotide-binding protein 2) (Interferon-induced guanylate-binding protein 2)
Q9Z0E6	Gbp2	GBP2_MOUSE	Q9Z0E6_K581	TB_24H-MOCK_24H	#NUM!		0	yes	6.30348	0.0274658	Guanylate-binding protein 1 (EC 3.6.5.-) (GTP-binding protein 2) (GBP-2) (mGBP-2) (mGBP2) (Guanine nucleotide-binding protein 2) (Interferon-induced guanylate-binding protein 2)
Q9Z0E6	Gbp2	GBP2_MOUSE	Q9Z0E6_K389	TB_24H-MOCK_24H	5.08331	5.53856e-09	2.44927e-07	no	5.08331	2.44927e-07	Guanylate-binding protein 1 (EC 3.6.5.-) (GTP-binding protein 2) (GBP-2) (mGBP-2) (mGBP2) (Guanine nucleotide-binding protein 2) (Interferon-induced guanylate-binding protein 2)
Q9Z0E6	Gbp2	GBP2_MOUSE	Q9Z0E6_K215	TB_24H-MOCK_24H	#NUM!		0	yes	6.99011	0.0141321	Guanylate-binding protein 1 (EC 3.6.5.-) (GTP-binding protein 2) (GBP-2) (mGBP-2) (mGBP2) (Guanine nucleotide-binding protein 2) (Interferon-induced guanylate-binding protein 2)
Q9Z0E6	Gbp2	GBP2_MOUSE	Q9Z0E6_K396	TB_24H-MOCK_24H	#NUM!		0	yes	5.32948	0.0309976	Guanylate-binding protein 1 (EC 3.6.5.-) (GTP-binding protein 2) (GBP-2) (mGBP-2) (mGBP2) (Guanine nucleotide-binding protein 2) (Interferon-induced guanylate-binding protein 2)
Q9Z0F5	Ch25h	CH25H_MOUSE	Q9Z0F5_K294	TB_24H-MOCK_24H	#NUM!		0	yes	2.70201	0.0375904	Cholesterol 25-hydroxylase (EC 1.14.99.38) (Cholesterol 25-monooxygenase) (m25OH)
Q9Z0N1	Eif2s3x	IF2G_MOUSE	Q9Z0N2_K421,Q9Z0N1_K421	TB_24H-MOCK_24H	-0.318668	0.544361	0.702858	no	-0.318668	0.702858	Eukaryotic translation initiation factor 2 subunit 3, X-linked (Eukaryotic translation initiation factor 2 subunit gamma, X-linked) (eIF-2-gamma X)
Q9Z0N1	Eif2s3x	IF2G_MOUSE	Q9Z0N2_K59,Q9Z0N1_K59	TB_24H-MOCK_24H	0.434163	0.204697	0.379369	no	0.434163	0.379369	Eukaryotic translation initiation factor 2 subunit 3, X-linked (Eukaryotic translation initiation factor 2 subunit gamma, X-linked) (eIF-2-gamma X)
Q9Z0R4	Itsn1	ITSN1_MOUSE	Q9Z0R4_K620	TB_24H-MOCK_24H	-1.96235	0.00922733	0.0391731	no	-1.96235	0.0391731	Intersectin-1 (EH and SH3 domains protein 1)
Q9Z160	Cog1	COG1_MOUSE	Q9Z160_K11	TB_24H-MOCK_24H	-0.1919	0.638967	0.772862	no	-0.1919	0.772862	Conserved oligomeric Golgi complex subunit 1 (COG complex subunit 1) (Component of oligomeric Golgi complex 1) (Low density lipoprotein receptor defect B-complementing protein)
Q9Z1F9	Uba2	SAE2_MOUSE	Q9Z1F9_K65	TB_24H-MOCK_24H	#NUM!		0	yes	-3.45596	0.0456396	SUMO-activating enzyme subunit 2 (EC 6.3.2.-) (Anthracycline-associated resistance ARX) (Ubiquitin-like 1-activating enzyme E1B) (Ubiquitin-like modifier-activating enzyme 2)
Q9Z1F9	Uba2	SAE2_MOUSE	Q9Z1F9_K418	TB_24H-MOCK_24H	#NUM!		0	yes	-2.54971	0.010003	SUMO-activating enzyme subunit 2 (EC 6.3.2.-) (Anthracycline-associated resistance ARX) (Ubiquitin-like 1-activating enzyme E1B) (Ubiquitin-like modifier-activating enzyme 2)
Q9Z1G4	Atp6v0a1	VPP1_MOUSE	Q9Z1G4_K295	TB_24H-MOCK_24H	0.375234	0.318066	0.507187	no	0.375234	0.507187	V-type proton ATPase 116 kDa subunit a isoform 1 (V-ATPase 116 kDa isoform a1) (Clathrin-coated vesicle/synaptic vesicle proton pump 116 kDa subunit) (Vacuolar adenosine triphosphatase subunit Ac116) (Vacuolar proton pump subunit 1) (Vacuolar proton translocating ATPase 116 kDa subunit a isoform 1)
Q9Z1K5	Arih1	ARI1_MOUSE	Q9Z1K5_K253	TB_24H-MOCK_24H	-0.295644	0.531325	0.692315	no	-0.295644	0.692315	E3 ubiquitin-protein ligase ARIH1 (EC 2.3.2.-) (Protein ariadne-1 homolog) (ARI-1) (RING-type E3 ubiquitin transferase ARIH1) (UbcH7-binding protein) (UbcM4-interacting protein 77) (Ubiquitin-conjugating enzyme E2-binding protein 1)
Q9Z1K5	Arih1	ARI1_MOUSE	Q9Z1K5_K291	TB_24H-MOCK_24H	0.115423	0.437827	0.620103	no	0.115423	0.620103	E3 ubiquitin-protein ligase ARIH1 (EC 2.3.2.-) (Protein ariadne-1 homolog) (ARI-1) (RING-type E3 ubiquitin transferase ARIH1) (UbcH7-binding protein) (UbcM4-interacting protein 77) (Ubiquitin-conjugating enzyme E2-binding protein 1)
Q9Z1K6	Arih2	ARI2_MOUSE	Q9Z1K6_K258	TB_24H-MOCK_24H	1.13772	0.00508065	0.0245848	no	1.13772	0.0245848	E3 ubiquitin-protein ligase ARIH2 (ARI-2) (Protein ariadne-2 homolog) (EC 2.3.2.-) (RING-type E3 ubiquitin transferase ARIH2) (Triad1 protein) (UbcM4-interacting protein 48)
Q9Z1Q5	Clic1	CLIC1_MOUSE	Q9Z1Q5_K49	TB_24H-MOCK_24H	0.257304	0.428136	0.611293	no	0.257304	0.611293	Chloride intracellular channel protein 1 (Nuclear chloride ion channel 27) (NCC27)
Q9Z1Q5	Clic1	CLIC1_MOUSE	Q9Z1Q5_K20	TB_24H-MOCK_24H	-0.318293	0.348144	0.532928	no	-0.318293	0.532928	Chloride intracellular channel protein 1 (Nuclear chloride ion channel 27) (NCC27)
Q9Z1Q5	Clic1	CLIC1_MOUSE	Q9Z1Q5_K135	TB_24H-MOCK_24H	0.136957	0.692997	0.811222	no	0.136957	0.811222	Chloride intracellular channel protein 1 (Nuclear chloride ion channel 27) (NCC27)
Q9Z1Q5	Clic1	CLIC1_MOUSE	Q9Z1Q5_K193	TB_24H-MOCK_24H	0.619824	0.203455	0.378388	no	0.619824	0.378388	Chloride intracellular channel protein 1 (Nuclear chloride ion channel 27) (NCC27)
Q9Z1Q5	Clic1	CLIC1_MOUSE	Q9Z1Q5_K119	TB_24H-MOCK_24H	-0.0502171	0.835705	0.901995	no	-0.0502171	0.901995	Chloride intracellular channel protein 1 (Nuclear chloride ion channel 27) (NCC27)
Q9Z1Q5	Clic1	CLIC1_MOUSE	Q9Z1Q5_K13	TB_24H-MOCK_24H	1.48997	0.000236735	0.00194269	no	1.48997	0.00194269	Chloride intracellular channel protein 1 (Nuclear chloride ion channel 27) (NCC27)
Q9Z1Q5	Clic1	CLIC1_MOUSE	Q9Z1Q5_K192	TB_24H-MOCK_24H	-0.279259	0.333581	0.522387	no	-0.279259	0.522387	Chloride intracellular channel protein 1 (Nuclear chloride ion channel 27) (NCC27)
Q9Z1Q9	Vars	SYVC_MOUSE	Q9Z1Q9_K957	TB_24H-MOCK_24H	-0.37875	0.177439	0.347184	no	-0.37875	0.347184	Valine--tRNA ligase (EC 6.1.1.9) (Protein G7a) (Valyl-tRNA synthetase) (ValRS)
Q9Z1Q9	Vars	SYVC_MOUSE	Q9Z1Q9_K951	TB_24H-MOCK_24H	0.575747	0.416707	0.601449	no	0.575747	0.601449	Valine--tRNA ligase (EC 6.1.1.9) (Protein G7a) (Valyl-tRNA synthetase) (ValRS)
Q9Z1Z2	Strap	STRAP_MOUSE	Q9Z1Z2_K147	TB_24H-MOCK_24H	0.76373	0.156345	0.319105	no	0.76373	0.319105	Serine-threonine kinase receptor-associated protein (UNR-interacting protein)
Q9Z204	Hnrnpc	HNRPC_MOUSE	Q9Z204_K176	TB_24H-MOCK_24H	-1.02855	0.107159	0.240278	no	-1.02855	0.240278	Heterogeneous nuclear ribonucleoproteins C1/C2 (hnRNP C1/C2)
Q9Z204	Hnrnpc	HNRPC_MOUSE	Q9Z204_K50	TB_24H-MOCK_24H	-1.14659	0.217921	0.396945	no	-1.14659	0.396945	Heterogeneous nuclear ribonucleoproteins C1/C2 (hnRNP C1/C2)
Q9Z204	Hnrnpc	HNRPC_MOUSE	Q9Z204_K157	TB_24H-MOCK_24H	-1.10672	9.82341e-05	0.0009421	no	-1.10672	0.0009421	Heterogeneous nuclear ribonucleoproteins C1/C2 (hnRNP C1/C2)
Q9Z204	Hnrnpc	HNRPC_MOUSE	Q9Z204_K8	TB_24H-MOCK_24H	-0.304021	0.249031	0.436627	no	-0.304021	0.436627	Heterogeneous nuclear ribonucleoproteins C1/C2 (hnRNP C1/C2)
Q9Z204	Hnrnpc	HNRPC_MOUSE	Q9Z204_K29	TB_24H-MOCK_24H	0.560509	0.36464	0.550766	no	0.560509	0.550766	Heterogeneous nuclear ribonucleoproteins C1/C2 (hnRNP C1/C2)
Q9Z2F2	Oasl2	OASL2_MOUSE	Q9Z2F2_K66	TB_24H-MOCK_24H	#NUM!		0	yes	4.81305	0.0499554	2'-5'-oligoadenylate synthase-like protein 2 (EC 2.7.7.84) (54 kDa 2'-5'-oligoadenylate synthase-like protein) (p54 OASL) (M1204)
Q9Z2F2	Oasl2	OASL2_MOUSE	Q9Z2F2_K72	TB_24H-MOCK_24H	2.80605	8.70747e-06	0.000114564	no	2.80605	0.000114564	2'-5'-oligoadenylate synthase-like protein 2 (EC 2.7.7.84) (54 kDa 2'-5'-oligoadenylate synthase-like protein) (p54 OASL) (M1204)
Q9Z2F2	Oasl2	OASL2_MOUSE	Q9Z2F2_K141	TB_24H-MOCK_24H	2.67961	1.28494e-05	0.000162351	no	2.67961	0.000162351	2'-5'-oligoadenylate synthase-like protein 2 (EC 2.7.7.84) (54 kDa 2'-5'-oligoadenylate synthase-like protein) (p54 OASL) (M1204)
Q9Z2R9	Eif2ak1	E2AK1_MOUSE	Q9Z2R9_K296	TB_24H-MOCK_24H	-0.188328	0.82561	0.898408	no	-0.188328	0.898408	Eukaryotic translation initiation factor 2-alpha kinase 1 (EC 2.7.11.1) (Heme-controlled repressor) (HCR) (Heme-regulated eukaryotic initiation factor eIF-2-alpha kinase) (Heme-regulated inhibitor) (Hemin-sensitive initiation factor 2-alpha kinase)
Q9Z2U0	Psma7	PSA7_MOUSE	Q9Z2U0_K115	TB_24H-MOCK_24H	#NUM!		0	yes	3.64725	0.0469588	Proteasome subunit alpha type-7 (EC 3.4.25.1) (Proteasome subunit RC6-1)
Q9Z2U0	Psma7	PSA7_MOUSE	Q9Z2U0_K38	TB_24H-MOCK_24H	1.76453	0.000666997	0.00461678	no	1.76453	0.00461678	Proteasome subunit alpha type-7 (EC 3.4.25.1) (Proteasome subunit RC6-1)
Q9Z2U1	Psma5	PSA5_MOUSE	Q9Z2U1_K196	TB_24H-MOCK_24H	1.28943	1.15186e-05	0.000149087	no	1.28943	0.000149087	Proteasome subunit alpha type-5 (EC 3.4.25.1) (Macropain zeta chain) (Multicatalytic endopeptidase complex zeta chain) (Proteasome zeta chain)
Q9Z2U1	Psma5	PSA5_MOUSE	Q9Z2U1_K192	TB_24H-MOCK_24H	0.776024	0.0812	0.196623	no	0.776024	0.196623	Proteasome subunit alpha type-5 (EC 3.4.25.1) (Macropain zeta chain) (Multicatalytic endopeptidase complex zeta chain) (Proteasome zeta chain)
Q9Z2U1	Psma5	PSA5_MOUSE	Q9Z2U1_K187	TB_24H-MOCK_24H	1.06796	0.0154125	0.0574629	no	1.06796	0.0574629	Proteasome subunit alpha type-5 (EC 3.4.25.1) (Macropain zeta chain) (Multicatalytic endopeptidase complex zeta chain) (Proteasome zeta chain)
Q9Z2X1	Hnrnpf	HNRPF_MOUSE	Q9Z2X1_K224	TB_24H-MOCK_24H	-0.175881	0.439796	0.621255	no	-0.175881	0.621255	Heterogeneous nuclear ribonucleoprotein F (hnRNP F) [Cleaved into: Heterogeneous nuclear ribonucleoprotein F, N-terminally processed]

## Sheet: 8H
Protein	Gene	Entry.name	Uniprot_PTM	Comparison	log2FC	pvalue	adj.pvalue	imputed	iLog2FC	iPvalue	Protein.names
A1L314	Mpeg1	MPEG1_MOUSE	A1L314_K128	TB_08H-MOCK_06H	#NUM!		0	yes	3.4579	0.0457427	Macrophage-expressed gene 1 protein (Macrophage gene 1 protein) (Mpg-1) (Protein MPS1)
A1L314	Mpeg1	MPEG1_MOUSE	A1L314_K142	TB_08H-MOCK_06H	#NUM!		0	yes	4.8014	0.0466866	Macrophage-expressed gene 1 protein (Macrophage gene 1 protein) (Mpg-1) (Protein MPS1)
A2ADY9	Ddi2	DDI2_MOUSE	A2ADY9_K289	TB_08H-MOCK_06H	-0.713672	0.00238928	0.0326413	no	-0.713672	0.0326413	Protein DDI1 homolog 2
A2ADY9	Ddi2	DDI2_MOUSE	A2ADY9_K283	TB_08H-MOCK_06H	-0.674423	0.0058666	0.0620184	no	-0.674423	0.0620184	Protein DDI1 homolog 2
A2AGT5	Ckap5	CKAP5_MOUSE	A2AGT5_K96	TB_08H-MOCK_06H	-0.0595248	0.891605	0.960855	no	-0.0595248	0.960855	Cytoskeleton-associated protein 5
A2AQH4	Bcorl1	BCORL_MOUSE	Q8CGN4_K1464,A2AQH4_K1491	TB_08H-MOCK_06H	-0.71555	0.150123	0.445641	no	-0.71555	0.445641	BCL-6 corepressor-like protein 1 (BCoR-L1) (BCoR-like protein 1)
A2ASS6	Ttn	TITIN_MOUSE	A2ASS6_K4389	TB_08H-MOCK_06H	-0.117011	0.863155	0.95038	no	-0.117011	0.95038	Titin (EC 2.7.11.1) (Connectin)
A2ASS6	Ttn	TITIN_MOUSE	A2ASS6_K25781	TB_08H-MOCK_06H	0.858682	0.611446	0.871881	no	0.858682	0.871881	Titin (EC 2.7.11.1) (Connectin)
A2ASS6	Ttn	TITIN_MOUSE	A2ASS6_K28284,A2ASS6_K28292,A2ASS6_K28296	TB_08H-MOCK_06H	-1.66719	0.00597429	0.0627457	no	-1.66719	0.0627457	Titin (EC 2.7.11.1) (Connectin)
A2ASS6	Ttn	TITIN_MOUSE	A2ASS6_K10237	TB_08H-MOCK_06H	-1.09046	1.96464e-07	1.61445e-05	no	-1.09046	1.61445e-05	Titin (EC 2.7.11.1) (Connectin)
A6H8H2	Dennd4c	DEN4C_MOUSE	A6H8H2_K808	TB_08H-MOCK_06H	-0.265788	0.501514	0.801466	no	-0.265788	0.801466	DENN domain-containing protein 4C
A6H8H2	Dennd4c	DEN4C_MOUSE	A6H8H2_K1359	TB_08H-MOCK_06H	0.391737	0.259373	0.58617	no	0.391737	0.58617	DENN domain-containing protein 4C
A6H8H2	Dennd4c	DEN4C_MOUSE	A6H8H2_K1363	TB_08H-MOCK_06H	0.122493	0.666397	0.879861	no	0.122493	0.879861	DENN domain-containing protein 4C
A8Y5H7	Sec14l1	S14L1_MOUSE	A8Y5H7_K352	TB_08H-MOCK_06H	0.148307	0.543053	0.827155	no	0.148307	0.827155	SEC14-like protein 1
B1AY10	Nfx1	NFX1_MOUSE	B1AY10_K299	TB_08H-MOCK_06H	-0.995859	0.0259048	0.156464	no	-0.995859	0.156464	Transcriptional repressor NF-X1 (m-Nfx.1) (EC 6.3.2.-) (Nuclear transcription factor, X box-binding protein 1)
B2RSH2	Gnai1	GNAI1_MOUSE	Q9DC51_K46,B2RSH2_K46,P20612_K42,Q3V3I2_K46,P50149_K46,P18872_K46,Q8CGK7_K55,Q6R0H7_K792,P08752_K46,P63094_K53	TB_08H-MOCK_06H	0.169294	0.49746	0.797373	no	0.169294	0.797373	Guanine nucleotide-binding protein G(i) subunit alpha-1 (Adenylate cyclase-inhibiting G alpha protein)
B2RSH2	Gnai1	GNAI1_MOUSE	Q9DC51_K54,B2RSH2_K54,P20612_K50,Q3V3I2_K54,P50149_K54,P18872_K54,O70443_K54,P08752_K54	TB_08H-MOCK_06H	-0.189977	0.404527	0.729359	no	-0.189977	0.729359	Guanine nucleotide-binding protein G(i) subunit alpha-1 (Adenylate cyclase-inhibiting G alpha protein)
B2RUR8	Otud7b	OTU7B_MOUSE	B2RUR8_K511	TB_08H-MOCK_06H	0.488788	0.00600606	0.0627457	no	0.488788	0.0627457	OTU domain-containing protein 7B (EC 3.4.19.12) (Cellular zinc finger anti-NF-kappa-B protein) (Zinc finger A20 domain-containing protein 1) (Zinc finger protein Cezanne)
B9EJ86	Osbpl8	OSBL8_MOUSE	B9EJ86_K769	TB_08H-MOCK_06H	#NUM!		0	yes	-2.72444	0.0257548	Oxysterol-binding protein-related protein 8 (ORP-8) (OSBP-related protein 8)
C0HKE1	C0HKE1		Q6GSS7_K120,Q8CGP5_K120,C0HKE9_K120,C0HKE8_K120,C0HKE7_K120,C0HKE6_K120,C0HKE5_K120,C0HKE4_K120,C0HKE3_K120,C0HKE2_K120,C0HKE1_K120,Q8CGP6_K120,Q8BFU2_K120	TB_08H-MOCK_06H	-1.5118	0.0290827	0.169904	no	-1.5118	0.169904
D0QMC3	Mndal	MNDAL_MOUSE	D0QMC3_K197	TB_08H-MOCK_06H	#NUM!		0	yes	4.83219	0.0174835	Myeloid cell nuclear differentiation antigen-like protein
D0QMC3	Mndal	MNDAL_MOUSE	D0QMC3_K141	TB_08H-MOCK_06H	#NUM!		0	yes	5.10489	0.0359671	Myeloid cell nuclear differentiation antigen-like protein
D0QMC3	Mndal	MNDAL_MOUSE	D0QMC3_K122,O35368_K122	TB_08H-MOCK_06H	2.94238	1.67789e-05	0.000595988	no	2.94238	0.000595988	Myeloid cell nuclear differentiation antigen-like protein
D0QMC3	Mndal	MNDAL_MOUSE	D0QMC3_K136	TB_08H-MOCK_06H	2.28764	0.00308049	0.0382847	no	2.28764	0.0382847	Myeloid cell nuclear differentiation antigen-like protein
D0QMC3	Mndal	MNDAL_MOUSE	P0DOV2_K170,D0QMC3_K256	TB_08H-MOCK_06H	1.45234	0.0163053	0.11724	no	1.45234	0.11724	Myeloid cell nuclear differentiation antigen-like protein
D0QMC3	Mndal	MNDAL_MOUSE	D0QMC3_K102,O35368_K102	TB_08H-MOCK_06H	1.57816	0.00261835	0.0347029	no	1.57816	0.0347029	Myeloid cell nuclear differentiation antigen-like protein
E1U8D0	Soga1	SOGA1_MOUSE	E1U8D0_K1007	TB_08H-MOCK_06H	0.616982	0.193512	0.511426	no	0.616982	0.511426	Protein SOGA1 (SOGA family member 1) (Suppressor of glucose by autophagy) (Suppressor of glucose, autophagy-associated protein 1) [Cleaved into: N-terminal form; C-terminal 80 kDa form (80-kDa SOGA fragment)]
E9Q3E1	Aldh3b2	AL3B2_MOUSE	Q80VQ0_K289,J3QMK6_K302,E9Q3E1_K302	TB_08H-MOCK_06H	-0.064693	0.828568	0.939498	no	-0.064693	0.939498	Aldehyde dehydrogenase family 3 member B2 (EC 1.2.1.3) (Aldehyde dehydrogenase 8)
E9Q555	Rnf213	RN213_MOUSE	E9Q555_K3537	TB_08H-MOCK_06H	1.69444	0.00198499	0.027979	no	1.69444	0.027979	E3 ubiquitin-protein ligase RNF213 (EC 3.6.4.-) (EC 6.3.2.-) (Mysterin) (RING finger protein 213)
E9Q555	Rnf213	RN213_MOUSE	E9Q555_K4285	TB_08H-MOCK_06H	1.3706	0.0500817	0.238675	no	1.3706	0.238675	E3 ubiquitin-protein ligase RNF213 (EC 3.6.4.-) (EC 6.3.2.-) (Mysterin) (RING finger protein 213)
E9Q555	Rnf213	RN213_MOUSE	E9Q555_K483	TB_08H-MOCK_06H	2.4673	1.99988e-07	1.61445e-05	no	2.4673	1.61445e-05	E3 ubiquitin-protein ligase RNF213 (EC 3.6.4.-) (EC 6.3.2.-) (Mysterin) (RING finger protein 213)
E9Q555	Rnf213	RN213_MOUSE	E9Q555_K2398	TB_08H-MOCK_06H	1.19505	2.67728e-09	4.45588e-07	no	1.19505	4.45588e-07	E3 ubiquitin-protein ligase RNF213 (EC 3.6.4.-) (EC 6.3.2.-) (Mysterin) (RING finger protein 213)
E9Q555	Rnf213	RN213_MOUSE	E9Q555_K3547	TB_08H-MOCK_06H	#NUM!		0	yes	2.38895	0.0485182	E3 ubiquitin-protein ligase RNF213 (EC 3.6.4.-) (EC 6.3.2.-) (Mysterin) (RING finger protein 213)
E9Q555	Rnf213	RN213_MOUSE	E9Q555_K4743	TB_08H-MOCK_06H	#NUM!		0	yes	2.57755	0.04215	E3 ubiquitin-protein ligase RNF213 (EC 3.6.4.-) (EC 6.3.2.-) (Mysterin) (RING finger protein 213)
E9Q555	Rnf213	RN213_MOUSE	E9Q555_K1970	TB_08H-MOCK_06H	2.48512	5.39035e-05	0.00162527	no	2.48512	0.00162527	E3 ubiquitin-protein ligase RNF213 (EC 3.6.4.-) (EC 6.3.2.-) (Mysterin) (RING finger protein 213)
E9Q555	Rnf213	RN213_MOUSE	E9Q555_K2426	TB_08H-MOCK_06H	0.506623	0.617237	0.871881	no	0.506623	0.871881	E3 ubiquitin-protein ligase RNF213 (EC 3.6.4.-) (EC 6.3.2.-) (Mysterin) (RING finger protein 213)
E9Q555	Rnf213	RN213_MOUSE	E9Q555_K2408	TB_08H-MOCK_06H	-0.314555	0.160489	0.464215	no	-0.314555	0.464215	E3 ubiquitin-protein ligase RNF213 (EC 3.6.4.-) (EC 6.3.2.-) (Mysterin) (RING finger protein 213)
E9Q555	Rnf213	RN213_MOUSE	E9Q555_K2424	TB_08H-MOCK_06H	-0.476906	0.593848	0.859819	no	-0.476906	0.859819	E3 ubiquitin-protein ligase RNF213 (EC 3.6.4.-) (EC 6.3.2.-) (Mysterin) (RING finger protein 213)
E9Q555	Rnf213	RN213_MOUSE	E9Q555_K2097	TB_08H-MOCK_06H	0.599256	0.47049	0.781656	no	0.599256	0.781656	E3 ubiquitin-protein ligase RNF213 (EC 3.6.4.-) (EC 6.3.2.-) (Mysterin) (RING finger protein 213)
E9Q555	Rnf213	RN213_MOUSE	E9Q555_K4381	TB_08H-MOCK_06H	0.632139	0.199706	0.521147	no	0.632139	0.521147	E3 ubiquitin-protein ligase RNF213 (EC 3.6.4.-) (EC 6.3.2.-) (Mysterin) (RING finger protein 213)
E9Q555	Rnf213	RN213_MOUSE	E9Q555_K1972	TB_08H-MOCK_06H	#NUM!		0	yes	4.34117	0.0327701	E3 ubiquitin-protein ligase RNF213 (EC 3.6.4.-) (EC 6.3.2.-) (Mysterin) (RING finger protein 213)
E9Q555	Rnf213	RN213_MOUSE	E9Q555_K2906	TB_08H-MOCK_06H	0.624068	0.124374	0.410228	no	0.624068	0.410228	E3 ubiquitin-protein ligase RNF213 (EC 3.6.4.-) (EC 6.3.2.-) (Mysterin) (RING finger protein 213)
E9Q555	Rnf213	RN213_MOUSE	E9Q555_K2303	TB_08H-MOCK_06H	0.963965	0.0177562	0.124644	no	0.963965	0.124644	E3 ubiquitin-protein ligase RNF213 (EC 3.6.4.-) (EC 6.3.2.-) (Mysterin) (RING finger protein 213)
E9Q555	Rnf213	RN213_MOUSE	E9Q555_K419	TB_08H-MOCK_06H	#NUM!		0	yes	4.48777	0.0358319	E3 ubiquitin-protein ligase RNF213 (EC 3.6.4.-) (EC 6.3.2.-) (Mysterin) (RING finger protein 213)
E9Q555	Rnf213	RN213_MOUSE	E9Q555_K4915	TB_08H-MOCK_06H	1.22427	0.00513003	0.0555545	no	1.22427	0.0555545	E3 ubiquitin-protein ligase RNF213 (EC 3.6.4.-) (EC 6.3.2.-) (Mysterin) (RING finger protein 213)
E9Q555	Rnf213	RN213_MOUSE	E9Q555_K2839	TB_08H-MOCK_06H	0.864105	0.0359878	0.196034	no	0.864105	0.196034	E3 ubiquitin-protein ligase RNF213 (EC 3.6.4.-) (EC 6.3.2.-) (Mysterin) (RING finger protein 213)
E9Q555	Rnf213	RN213_MOUSE	E9Q555_K4293	TB_08H-MOCK_06H	#NUM!		0	yes	5.07706	0.0393765	E3 ubiquitin-protein ligase RNF213 (EC 3.6.4.-) (EC 6.3.2.-) (Mysterin) (RING finger protein 213)
E9Q634	Myo1e	MYO1E_MOUSE	E9Q634_K40	TB_08H-MOCK_06H	-0.26212	0.527958	0.816772	no	-0.26212	0.816772	Unconventional myosin-Ie (Unconventional myosin 1E)
E9Q634	Myo1e	MYO1E_MOUSE	P70248_K194,E9Q634_K196	TB_08H-MOCK_06H	-0.209132	0.683814	0.88711	no	-0.209132	0.88711	Unconventional myosin-Ie (Unconventional myosin 1E)
E9Q9A9	Oas2	OAS2_MOUSE	E9Q9A9_K105	TB_08H-MOCK_06H	0.0545175	0.86605	0.952977	no	0.0545175	0.952977	2'-5'-oligoadenylate synthase 2 ((2-5')oligo(A) synthase 2) (2-5A synthase 2) (EC 2.7.7.84) (2',5'-oligoadenylate synthetase-like 11)
E9Q9A9	Oas2	OAS2_MOUSE	E9Q9A9_K203	TB_08H-MOCK_06H	-0.391535	0.581528	0.852141	no	-0.391535	0.852141	2'-5'-oligoadenylate synthase 2 ((2-5')oligo(A) synthase 2) (2-5A synthase 2) (EC 2.7.7.84) (2',5'-oligoadenylate synthetase-like 11)
E9Q9A9	Oas2	OAS2_MOUSE	E9Q9A9_K202	TB_08H-MOCK_06H	-0.324911	0.27257	0.599272	no	-0.324911	0.599272	2'-5'-oligoadenylate synthase 2 ((2-5')oligo(A) synthase 2) (2-5A synthase 2) (EC 2.7.7.84) (2',5'-oligoadenylate synthetase-like 11)
E9QAM5	Helz2	HELZ2_MOUSE	E9QAM5_K1429	TB_08H-MOCK_06H	2.55147	0.000303123	0.00673442	no	2.55147	0.00673442	Helicase with zinc finger domain 2 (EC 3.6.4.-) (PPAR-gamma DNA-binding domain-interacting protein 1) (PDIP1) (PPAR-gamma DBD-interacting protein 1)
F2Z461	Herc6	HERC6_MOUSE	F2Z461_K389	TB_08H-MOCK_06H	2.54646	4.50363e-09	6.40946e-07	no	2.54646	6.40946e-07	E3 ISG15--protein ligase Herc6 (EC 2.3.2.-)
F2Z461	Herc6	HERC6_MOUSE	F2Z461_K163	TB_08H-MOCK_06H	2.76889	0.000213794	0.00520134	no	2.76889	0.00520134	E3 ISG15--protein ligase Herc6 (EC 2.3.2.-)
F2Z461	Herc6	HERC6_MOUSE	F2Z461_K175	TB_08H-MOCK_06H	#NUM!		0	yes	3.72824	0.0445592	E3 ISG15--protein ligase Herc6 (EC 2.3.2.-)
F2Z461	Herc6	HERC6_MOUSE	F2Z461_K122	TB_08H-MOCK_06H	2.6044	4.73079e-06	0.000210047	no	2.6044	0.000210047	E3 ISG15--protein ligase Herc6 (EC 2.3.2.-)
F7BJB9	Morc3	MORC3_MOUSE	F7BJB9_K894	TB_08H-MOCK_06H	-0.471052	0.0534021	0.243533	no	-0.471052	0.243533	MORC family CW-type zinc finger protein 3 (Nuclear matrix protein 2) (Zinc finger CW-type coiled-coil domain protein 3)
F7BJB9	Morc3	MORC3_MOUSE	F7BJB9_K558	TB_08H-MOCK_06H	-0.823973	0.0372858	0.201275	no	-0.823973	0.201275	MORC family CW-type zinc finger protein 3 (Nuclear matrix protein 2) (Zinc finger CW-type coiled-coil domain protein 3)
G5E829	Atp2b1	AT2B1_MOUSE	G5E829_K64	TB_08H-MOCK_06H	-0.145568	0.553325	0.837771	no	-0.145568	0.837771	Plasma membrane calcium-transporting ATPase 1 (PMCA1) (EC 3.6.3.8) (Plasma membrane calcium ATPase isoform 1) (Plasma membrane calcium pump isoform 1)
G5E829	Atp2b1	AT2B1_MOUSE	G5E829_K62	TB_08H-MOCK_06H	0.432488	0.737029	0.908371	no	0.432488	0.908371	Plasma membrane calcium-transporting ATPase 1 (PMCA1) (EC 3.6.3.8) (Plasma membrane calcium ATPase isoform 1) (Plasma membrane calcium pump isoform 1)
G5E829	Atp2b1	AT2B1_MOUSE	G5E829_K806,Q6Q477_K795,Q9R0K7_K784	TB_08H-MOCK_06H	-0.739451	0.200125	0.521147	no	-0.739451	0.521147	Plasma membrane calcium-transporting ATPase 1 (PMCA1) (EC 3.6.3.8) (Plasma membrane calcium ATPase isoform 1) (Plasma membrane calcium pump isoform 1)
G5E870	Trip12	TRIPC_MOUSE	G5E870_K1034	TB_08H-MOCK_06H	-0.0435101	0.799847	0.926632	no	-0.0435101	0.926632	E3 ubiquitin-protein ligase TRIP12 (EC 2.3.2.26) (HECT-type E3 ubiquitin transferase TRIP12) (Thyroid receptor-interacting protein 12) (TR-interacting protein 12) (TRIP-12)
G5E870	Trip12	TRIPC_MOUSE	G5E870_K1071	TB_08H-MOCK_06H	-0.268272	0.591714	0.858716	no	-0.268272	0.858716	E3 ubiquitin-protein ligase TRIP12 (EC 2.3.2.26) (HECT-type E3 ubiquitin transferase TRIP12) (Thyroid receptor-interacting protein 12) (TR-interacting protein 12) (TRIP-12)
O08553	Dpysl2	DPYL2_MOUSE	O08553_K525	TB_08H-MOCK_06H	0.35585	0.376334	0.703852	no	0.35585	0.703852	Dihydropyrimidinase-related protein 2 (DRP-2) (Unc-33-like phosphoprotein 2) (ULIP-2)
O08585	Clta	CLCA_MOUSE	O08585_K229	TB_08H-MOCK_06H	0.909588	0.0113573	0.0938166	no	0.909588	0.0938166	Clathrin light chain A (Lca)
O08638	Myh11	MYH11_MOUSE	Q8VDD5_K228,O08638_K235,Q6URW6_K259	TB_08H-MOCK_06H	-0.124756	0.677126	0.885549	no	-0.124756	0.885549	Myosin-11 (Myosin heavy chain 11) (Myosin heavy chain, smooth muscle isoform) (SMMHC)
O08638	Myh11	MYH11_MOUSE	Q8VDD5_K228,O08638_K235,Q61879_K235,Q6URW6_K259	TB_08H-MOCK_06H	#NUM!		0	yes	3.31341	0.0391903	Myosin-11 (Myosin heavy chain 11) (Myosin heavy chain, smooth muscle isoform) (SMMHC)
O08638	Myh11	MYH11_MOUSE	Q8VDD5_K540,O08638_K547,Q6URW6_K570	TB_08H-MOCK_06H	-1.4365	0.0091411	0.0807691	no	-1.4365	0.0807691	Myosin-11 (Myosin heavy chain 11) (Myosin heavy chain, smooth muscle isoform) (SMMHC)
O08638	Myh11	MYH11_MOUSE	Q8VDD5_K225,O08638_K232,Q6URW6_K256	TB_08H-MOCK_06H	0.63881	0.306512	0.629294	no	0.63881	0.629294	Myosin-11 (Myosin heavy chain 11) (Myosin heavy chain, smooth muscle isoform) (SMMHC)
O08709	Prdx6	PRDX6_MOUSE	O08709_K209	TB_08H-MOCK_06H	0.509865	0.135672	0.427758	no	0.509865	0.427758	Peroxiredoxin-6 (EC 1.11.1.15) (1-Cys peroxiredoxin) (1-Cys PRX) (Acidic calcium-independent phospholipase A2) (aiPLA2) (EC 3.1.1.-) (Antioxidant protein 2) (Non-selenium glutathione peroxidase) (NSGPx) (EC 1.11.1.9)
O08788	Dctn1	DCTN1_MOUSE	O08788_K1120	TB_08H-MOCK_06H	0.2209	0.604042	0.870056	no	0.2209	0.870056	Dynactin subunit 1 (150 kDa dynein-associated polypeptide) (DAP-150) (DP-150) (p150-glued)
O08796	Eef2k	EF2K_MOUSE	O08796_K346	TB_08H-MOCK_06H	#NUM!		0	yes	-3.84805	0.0307836	Eukaryotic elongation factor 2 kinase (eEF-2 kinase) (eEF-2K) (EC 2.7.11.20) (Calcium/calmodulin-dependent eukaryotic elongation factor 2 kinase)
O08992	Sdcbp	SDCB1_MOUSE	O08992_K180	TB_08H-MOCK_06H	1.63481	0.00115589	0.0188337	no	1.63481	0.0188337	Syntenin-1 (Scaffold protein Pbp1) (Syndecan-binding protein 1)
O08992	Sdcbp	SDCB1_MOUSE	O08992_K186	TB_08H-MOCK_06H	2.68528	4.13464e-06	0.000188285	no	2.68528	0.000188285	Syntenin-1 (Scaffold protein Pbp1) (Syndecan-binding protein 1)
O09044	Snap23	SNP23_MOUSE	O09044_K140	TB_08H-MOCK_06H	-0.400353	0.279108	0.606199	no	-0.400353	0.606199	Synaptosomal-associated protein 23 (SNAP-23) (Syndet) (Vesicle-membrane fusion protein SNAP-23)
O09106	Hdac1	HDAC1_MOUSE	O09106_K89,P70288_K90	TB_08H-MOCK_06H	0.0322092	0.950335	0.979648	no	0.0322092	0.979648	Histone deacetylase 1 (HD1) (EC 3.5.1.98)
O35226	Psmd4	PSMD4_MOUSE	O35226_K74	TB_08H-MOCK_06H	-0.163205	0.714435	0.896473	no	-0.163205	0.896473	26S proteasome non-ATPase regulatory subunit 4 (26S proteasome regulatory subunit RPN10) (26S proteasome regulatory subunit S5A) (Multiubiquitin chain-binding protein)
O35226	Psmd4	PSMD4_MOUSE	O35226_K40	TB_08H-MOCK_06H	0.421177	0.336856	0.666951	no	0.421177	0.666951	26S proteasome non-ATPase regulatory subunit 4 (26S proteasome regulatory subunit RPN10) (26S proteasome regulatory subunit S5A) (Multiubiquitin chain-binding protein)
O35226	Psmd4	PSMD4_MOUSE	O35226_K83	TB_08H-MOCK_06H	-0.364968	0.204805	0.526738	no	-0.364968	0.526738	26S proteasome non-ATPase regulatory subunit 4 (26S proteasome regulatory subunit RPN10) (26S proteasome regulatory subunit S5A) (Multiubiquitin chain-binding protein)
O35295	Purb	PURB_MOUSE	O35295_K82	TB_08H-MOCK_06H	0.125277	0.684861	0.887271	no	0.125277	0.887271	Transcriptional activator protein Pur-beta (Purine-rich element-binding protein B) (Vascular actin single-stranded DNA-binding factor 2 p44 component)
O35309	Nmi	NMI_MOUSE	O35309_K230	TB_08H-MOCK_06H	2.10801	7.6253e-07	4.66984e-05	no	2.10801	4.66984e-05	N-myc-interactor (Nmi) (N-myc and STAT interactor)
O35309	Nmi	NMI_MOUSE	O35309_K9	TB_08H-MOCK_06H	0.5219	0.585456	0.854443	no	0.5219	0.854443	N-myc-interactor (Nmi) (N-myc and STAT interactor)
O35368	Ifi203	IFI3_MOUSE	O35368_K136	TB_08H-MOCK_06H	#NUM!		0	yes	3.78604	0.0170977	Interferon-activable protein 203 (Ifi-203) (Interferon-inducible protein p203)
O35379	Abcc1	MRP1_MOUSE	O35379_K637	TB_08H-MOCK_06H	0.109425	0.753237	0.910083	no	0.109425	0.910083	Multidrug resistance-associated protein 1 (ATP-binding cassette sub-family C member 1) (Leukotriene C(4) transporter) (LTC4 transporter)
O35379	Abcc1	MRP1_MOUSE	O35379_K497	TB_08H-MOCK_06H	0.137805	0.806791	0.931769	no	0.137805	0.931769	Multidrug resistance-associated protein 1 (ATP-binding cassette sub-family C member 1) (Leukotriene C(4) transporter) (LTC4 transporter)
O35459	Ech1	ECH1_MOUSE	O35459_K10	TB_08H-MOCK_06H	#NUM!		0	yes	-2.55992	0.0212049	Delta(3,5)-Delta(2,4)-dienoyl-CoA isomerase, mitochondrial (EC 5.3.3.-)
O35459	Ech1	ECH1_MOUSE	O35459_K150	TB_08H-MOCK_06H	-0.436116	0.237266	0.559197	no	-0.436116	0.559197	Delta(3,5)-Delta(2,4)-dienoyl-CoA isomerase, mitochondrial (EC 5.3.3.-)
O35459	Ech1	ECH1_MOUSE	O35459_K147	TB_08H-MOCK_06H	-0.0178285	0.967935	0.986261	no	-0.0178285	0.986261	Delta(3,5)-Delta(2,4)-dienoyl-CoA isomerase, mitochondrial (EC 5.3.3.-)
O35484	Azin1	AZIN1_MOUSE	O35484_K175	TB_08H-MOCK_06H	-2.11046	0.0605413	0.262889	no	-2.11046	0.262889	Antizyme inhibitor 1 (AZI) (Ornithine decarboxylase antizyme inhibitor)
O35609	Scamp3	SCAM3_MOUSE	O35609_K104	TB_08H-MOCK_06H	#NUM!		0	yes	3.72376	0.0247045	Secretory carrier-associated membrane protein 3 (Secretory carrier membrane protein 3)
O35639	Anxa3	ANXA3_MOUSE	O35639_K263	TB_08H-MOCK_06H	0.181161	0.631648	0.873001	no	0.181161	0.873001	Annexin A3 (35-alpha calcimedin) (Annexin III) (Annexin-3) (Lipocortin III) (Placental anticoagulant protein III) (PAP-III)
O35643	Ap1b1	AP1B1_MOUSE	O35643_K727	TB_08H-MOCK_06H	-0.899321	0.160371	0.464215	no	-0.899321	0.464215	AP-1 complex subunit beta-1 (Adaptor protein complex AP-1 subunit beta-1) (Adaptor-related protein complex 1 subunit beta-1) (Beta-1-adaptin) (Beta-adaptin 1) (Clathrin assembly protein complex 1 beta large chain) (Golgi adaptor HA1/AP1 adaptin beta subunit)
O35864	Cops5	CSN5_MOUSE	O35864_K56	TB_08H-MOCK_06H	-0.13524	0.739993	0.910083	no	-0.13524	0.910083	COP9 signalosome complex subunit 5 (SGN5) (Signalosome subunit 5) (EC 3.4.-.-) (Jun activation domain-binding protein 1) (Kip1 C-terminus-interacting protein 2)
O35904	Pik3cd	PK3CD_MOUSE	O35904_K699	TB_08H-MOCK_06H	0.627674	0.153154	0.450105	no	0.627674	0.450105	Phosphatidylinositol 4,5-bisphosphate 3-kinase catalytic subunit delta isoform (PI3-kinase subunit delta) (PI3K-delta) (PI3Kdelta) (PtdIns-3-kinase subunit delta) (EC 2.7.1.153) (Phosphatidylinositol 4,5-bisphosphate 3-kinase 110 kDa catalytic subunit delta) (PtdIns-3-kinase subunit p110-delta) (p110delta)
O35904	Pik3cd	PK3CD_MOUSE	O35904_K690	TB_08H-MOCK_06H	0.260787	0.0675656	0.281022	no	0.260787	0.281022	Phosphatidylinositol 4,5-bisphosphate 3-kinase catalytic subunit delta isoform (PI3-kinase subunit delta) (PI3K-delta) (PI3Kdelta) (PtdIns-3-kinase subunit delta) (EC 2.7.1.153) (Phosphatidylinositol 4,5-bisphosphate 3-kinase 110 kDa catalytic subunit delta) (PtdIns-3-kinase subunit p110-delta) (p110delta)
O54965	Rnf13	RNF13_MOUSE	O54965_K273	TB_08H-MOCK_06H	-0.921941	0.0422835	0.215792	no	-0.921941	0.215792	E3 ubiquitin-protein ligase RNF13 (EC 6.3.2.-) (RING finger protein 13)
O54965	Rnf13	RNF13_MOUSE	O54965_K275	TB_08H-MOCK_06H	-1.10967	0.000318448	0.00698227	no	-1.10967	0.00698227	E3 ubiquitin-protein ligase RNF13 (EC 6.3.2.-) (RING finger protein 13)
O54965	Rnf13	RNF13_MOUSE	O54965_K284	TB_08H-MOCK_06H	1.50885	0.0903358	0.342502	no	1.50885	0.342502	E3 ubiquitin-protein ligase RNF13 (EC 6.3.2.-) (RING finger protein 13)
O55100	Syngr1	SNG1_MOUSE	O55100_K10	TB_08H-MOCK_06H	0.756221	0.0866147	0.334236	no	0.756221	0.334236	Synaptogyrin-1
O55142	Rpl35a	RL35A_MOUSE	O55142_K95	TB_08H-MOCK_06H	0.0713306	0.7685	0.916027	no	0.0713306	0.916027	60S ribosomal protein L35a
O55143	Atp2a2	AT2A2_MOUSE	O55143_K628	TB_08H-MOCK_06H	-0.507163	0.51394	0.810619	no	-0.507163	0.810619	Sarcoplasmic/endoplasmic reticulum calcium ATPase 2 (SERCA2) (SR Ca(2+)-ATPase 2) (EC 3.6.3.8) (Calcium pump 2) (Calcium-transporting ATPase sarcoplasmic reticulum type, slow twitch skeletal muscle isoform) (Endoplasmic reticulum class 1/2 Ca(2+) ATPase)
O70133	Dhx9	DHX9_MOUSE	O70133_K859	TB_08H-MOCK_06H	-0.400731	0.133685	0.42473	no	-0.400731	0.42473	ATP-dependent RNA helicase A (RHA) (EC 3.6.4.13) (DEAH box protein 9) (mHEL-5) (Nuclear DNA helicase II) (NDH II)
O70133	Dhx9	DHX9_MOUSE	O70133_K148	TB_08H-MOCK_06H	0.0580911	0.944349	0.977145	no	0.0580911	0.977145	ATP-dependent RNA helicase A (RHA) (EC 3.6.4.13) (DEAH box protein 9) (mHEL-5) (Nuclear DNA helicase II) (NDH II)
O70145	Ncf2	NCF2_MOUSE	O70145_K507	TB_08H-MOCK_06H	0.0364735	0.938893	0.976951	no	0.0364735	0.976951	Neutrophil cytosol factor 2 (NCF-2) (67 kDa neutrophil oxidase factor) (NADPH oxidase activator 2) (Neutrophil NADPH oxidase factor 2) (p67-phox)
O70145	Ncf2	NCF2_MOUSE	O70145_K516	TB_08H-MOCK_06H	-0.704039	0.127174	0.413665	no	-0.704039	0.413665	Neutrophil cytosol factor 2 (NCF-2) (67 kDa neutrophil oxidase factor) (NADPH oxidase activator 2) (Neutrophil NADPH oxidase factor 2) (p67-phox)
O70161	Pip5k1c	PI51C_MOUSE	O70161_K345	TB_08H-MOCK_06H	#NUM!		0	yes	5.601	0.035219	Phosphatidylinositol 4-phosphate 5-kinase type-1 gamma (PIP5K1-gamma) (PtdIns(4)P-5-kinase 1 gamma) (EC 2.7.1.68) (Phosphatidylinositol 4-phosphate 5-kinase type I gamma) (PIP5KIgamma)
O70194	Eif3d	EIF3D_MOUSE	O70194_K275	TB_08H-MOCK_06H	-0.228994	0.541414	0.825366	no	-0.228994	0.825366	Eukaryotic translation initiation factor 3 subunit D (eIF3d) (Eukaryotic translation initiation factor 3 subunit 7) (eIF-3-zeta) (eIF3 p66)
O70250	Pgam2	PGAM2_MOUSE	Q9DBJ1_K100,O70250_K100	TB_08H-MOCK_06H	0.800114	0.082473	0.327678	no	0.800114	0.327678	Phosphoglycerate mutase 2 (EC 5.4.2.11) (EC 5.4.2.4) (BPG-dependent PGAM 2) (Muscle-specific phosphoglycerate mutase) (Phosphoglycerate mutase isozyme M) (PGAM-M)
O70252	Hmox2	HMOX2_MOUSE	O70252_K167	TB_08H-MOCK_06H	1.12703	0.00381047	0.0448172	no	1.12703	0.0448172	Heme oxygenase 2 (HO-2) (EC 1.14.14.18)
O70252	Hmox2	HMOX2_MOUSE	O70252_K215	TB_08H-MOCK_06H	-0.237295	0.536967	0.822102	no	-0.237295	0.822102	Heme oxygenase 2 (HO-2) (EC 1.14.14.18)
O70252	Hmox2	HMOX2_MOUSE	O70252_K132	TB_08H-MOCK_06H	0.208111	0.0484888	0.23529	no	0.208111	0.23529	Heme oxygenase 2 (HO-2) (EC 1.14.14.18)
O70252	Hmox2	HMOX2_MOUSE	O70252_K168	TB_08H-MOCK_06H	#NUM!		0	yes	3.95571	0.0499926	Heme oxygenase 2 (HO-2) (EC 1.14.14.18)
O70309	Itgb5	ITB5_MOUSE	O70309_K789	TB_08H-MOCK_06H	-0.737535	0.264146	0.591616	no	-0.737535	0.591616	Integrin beta-5
O70310	Nmt1	NMT1_MOUSE	O70310_K107	TB_08H-MOCK_06H	-0.731807	0.106772	0.377338	no	-0.731807	0.377338	Glycylpeptide N-tetradecanoyltransferase 1 (EC 2.3.1.97) (Myristoyl-CoA:protein N-myristoyltransferase 1) (NMT 1) (Type I N-myristoyltransferase) (Peptide N-myristoyltransferase 1)
O70310	Nmt1	NMT1_MOUSE	O70310_K114	TB_08H-MOCK_06H	0.836262	0.0853343	0.334236	no	0.836262	0.334236	Glycylpeptide N-tetradecanoyltransferase 1 (EC 2.3.1.97) (Myristoyl-CoA:protein N-myristoyltransferase 1) (NMT 1) (Type I N-myristoyltransferase) (Peptide N-myristoyltransferase 1)
O70439	Stx7	STX7_MOUSE	O70439_K24	TB_08H-MOCK_06H	-0.738687	0.0492566	0.237717	no	-0.738687	0.237717	Syntaxin-7
O70456	Sfn	1433S_MOUSE	Q9CQV8_K124,P63101_K122,P68254_K122,P61982_K127,P68510_K127,O70456_K124	TB_08H-MOCK_06H	-0.67336	0.0160823	0.116106	no	-0.67336	0.116106	14-3-3 protein sigma (Stratifin)
O70492	Snx3	SNX3_MOUSE	O70492_K63,O70493_K64	TB_08H-MOCK_06H	-0.143239	0.434424	0.754929	no	-0.143239	0.754929	Sorting nexin-3 (SDP3 protein)
O70492	Snx3	SNX3_MOUSE	O70492_K95	TB_08H-MOCK_06H	#NUM!		0	yes	3.89272	0.0464602	Sorting nexin-3 (SDP3 protein)
O70492	Snx3	SNX3_MOUSE	O70492_K61	TB_08H-MOCK_06H	-0.387931	0.269816	0.599272	no	-0.387931	0.599272	Sorting nexin-3 (SDP3 protein)
O70492	Snx3	SNX3_MOUSE	O70492_K54	TB_08H-MOCK_06H	0.369483	0.147532	0.439626	no	0.369483	0.439626	Sorting nexin-3 (SDP3 protein)
O70492	Snx3	SNX3_MOUSE	O70492_K63	TB_08H-MOCK_06H	0.793337	0.305026	0.629294	no	0.793337	0.629294	Sorting nexin-3 (SDP3 protein)
O70492	Snx3	SNX3_MOUSE	O70492_K61,O70493_K62	TB_08H-MOCK_06H	#NUM!		0	yes	6.66451	0.0110912	Sorting nexin-3 (SDP3 protein)
O88286	Wiz	WIZ_MOUSE	O88286_K1630	TB_08H-MOCK_06H	0.651533	0.395533	0.720478	no	0.651533	0.720478	Protein Wiz (Widely-interspaced zinc finger-containing protein)
O88342	Wdr1	WDR1_MOUSE	O88342_K321	TB_08H-MOCK_06H	0.278501	0.630943	0.873001	no	0.278501	0.873001	WD repeat-containing protein 1 (Actin-interacting protein 1) (AIP1)
O88342	Wdr1	WDR1_MOUSE	O88342_K81	TB_08H-MOCK_06H	-0.069958	0.814751	0.931769	no	-0.069958	0.931769	WD repeat-containing protein 1 (Actin-interacting protein 1) (AIP1)
O88342	Wdr1	WDR1_MOUSE	O88342_K7	TB_08H-MOCK_06H	-0.0736544	0.871458	0.954271	no	-0.0736544	0.954271	WD repeat-containing protein 1 (Actin-interacting protein 1) (AIP1)
O88342	Wdr1	WDR1_MOUSE	O88342_K38	TB_08H-MOCK_06H	0.408112	0.48505	0.792155	no	0.408112	0.792155	WD repeat-containing protein 1 (Actin-interacting protein 1) (AIP1)
O88522	Ikbkg	NEMO_MOUSE	O88522_K302	TB_08H-MOCK_06H	#NUM!		0	yes	4.43281	0.0469419	NF-kappa-B essential modulator (NEMO) (IkB kinase-associated protein 1) (IKKAP1) (mFIP-3) (Inhibitor of nuclear factor kappa-B kinase subunit gamma) (I-kappa-B kinase subunit gamma) (IKK-gamma) (IKKG) (IkB kinase subunit gamma) (NF-kappa-B essential modifier)
O88543	Cops3	CSN3_MOUSE	O88543_K281	TB_08H-MOCK_06H	#NUM!		0	yes	2.88232	0.0172989	COP9 signalosome complex subunit 3 (SGN3) (Signalosome subunit 3) (JAB1-containing signalosome subunit 3)
O88569	Hnrnpa2b1	ROA2_MOUSE	O88569_K59	TB_08H-MOCK_06H	-0.0476519	0.957075	0.98276	no	-0.0476519	0.98276	Heterogeneous nuclear ribonucleoproteins A2/B1 (hnRNP A2/B1)
O88685	Psmc3	PRS6A_MOUSE	O88685_K123	TB_08H-MOCK_06H	1.31252	0.00796739	0.0740842	no	1.31252	0.0740842	26S protease regulatory subunit 6A (26S proteasome AAA-ATPase subunit RPT5) (Proteasome 26S subunit ATPase 3) (Tat-binding protein 1) (TBP-1)
O88685	Psmc3	PRS6A_MOUSE	O88685_K73	TB_08H-MOCK_06H	#NUM!		0	yes	5.03839	0.0263601	26S protease regulatory subunit 6A (26S proteasome AAA-ATPase subunit RPT5) (Proteasome 26S subunit ATPase 3) (Tat-binding protein 1) (TBP-1)
O88685	Psmc3	PRS6A_MOUSE	O88685_K279	TB_08H-MOCK_06H	0.944294	0.432958	0.753856	no	0.944294	0.753856	26S protease regulatory subunit 6A (26S proteasome AAA-ATPase subunit RPT5) (Proteasome 26S subunit ATPase 3) (Tat-binding protein 1) (TBP-1)
O88685	Psmc3	PRS6A_MOUSE	O88685_K128	TB_08H-MOCK_06H	-0.140238	0.367044	0.69717	no	-0.140238	0.69717	26S protease regulatory subunit 6A (26S proteasome AAA-ATPase subunit RPT5) (Proteasome 26S subunit ATPase 3) (Tat-binding protein 1) (TBP-1)
O88685	Psmc3	PRS6A_MOUSE	O88685_K59	TB_08H-MOCK_06H	0.017982	0.970134	0.987243	no	0.017982	0.987243	26S protease regulatory subunit 6A (26S proteasome AAA-ATPase subunit RPT5) (Proteasome 26S subunit ATPase 3) (Tat-binding protein 1) (TBP-1)
O88685	Psmc3	PRS6A_MOUSE	O88685_K281	TB_08H-MOCK_06H	-0.136431	0.730327	0.903875	no	-0.136431	0.903875	26S protease regulatory subunit 6A (26S proteasome AAA-ATPase subunit RPT5) (Proteasome 26S subunit ATPase 3) (Tat-binding protein 1) (TBP-1)
O88685	Psmc3	PRS6A_MOUSE	O88685_K248	TB_08H-MOCK_06H	-0.673628	0.34815	0.678677	no	-0.673628	0.678677	26S protease regulatory subunit 6A (26S proteasome AAA-ATPase subunit RPT5) (Proteasome 26S subunit ATPase 3) (Tat-binding protein 1) (TBP-1)
O88712	Ctbp1	CTBP1_MOUSE	O88712_K280,P56546_K286	TB_08H-MOCK_06H	-0.975418	0.00225172	0.0314886	no	-0.975418	0.0314886	C-terminal-binding protein 1 (CtBP1) (EC 1.1.1.-)
O88738	Birc6	BIRC6_MOUSE	O88738_K3169	TB_08H-MOCK_06H	-0.770596	0.02139	0.140699	no	-0.770596	0.140699	Baculoviral IAP repeat-containing protein 6 (EC 2.3.2.27) (BIR repeat-containing ubiquitin-conjugating enzyme) (BRUCE) (RING-type E3 ubiquitin transferase BIRC6) (Ubiquitin-conjugating BIR domain enzyme apollon) (APOLLON)
O88738	Birc6	BIRC6_MOUSE	O88738_K2302	TB_08H-MOCK_06H	-0.829751	0.0695201	0.287134	no	-0.829751	0.287134	Baculoviral IAP repeat-containing protein 6 (EC 2.3.2.27) (BIR repeat-containing ubiquitin-conjugating enzyme) (BRUCE) (RING-type E3 ubiquitin transferase BIRC6) (Ubiquitin-conjugating BIR domain enzyme apollon) (APOLLON)
O88738	Birc6	BIRC6_MOUSE	O88738_K2269	TB_08H-MOCK_06H	-0.502867	0.052812	0.242981	no	-0.502867	0.242981	Baculoviral IAP repeat-containing protein 6 (EC 2.3.2.27) (BIR repeat-containing ubiquitin-conjugating enzyme) (BRUCE) (RING-type E3 ubiquitin transferase BIRC6) (Ubiquitin-conjugating BIR domain enzyme apollon) (APOLLON)
O88738	Birc6	BIRC6_MOUSE	O88738_K1652	TB_08H-MOCK_06H	-0.450092	0.485587	0.792155	no	-0.450092	0.792155	Baculoviral IAP repeat-containing protein 6 (EC 2.3.2.27) (BIR repeat-containing ubiquitin-conjugating enzyme) (BRUCE) (RING-type E3 ubiquitin transferase BIRC6) (Ubiquitin-conjugating BIR domain enzyme apollon) (APOLLON)
O88738	Birc6	BIRC6_MOUSE	O88738_K2293	TB_08H-MOCK_06H	-0.62549	0.0460652	0.229165	no	-0.62549	0.229165	Baculoviral IAP repeat-containing protein 6 (EC 2.3.2.27) (BIR repeat-containing ubiquitin-conjugating enzyme) (BRUCE) (RING-type E3 ubiquitin transferase BIRC6) (Ubiquitin-conjugating BIR domain enzyme apollon) (APOLLON)
O88738	Birc6	BIRC6_MOUSE	O88738_K2288	TB_08H-MOCK_06H	0.0469296	0.891437	0.960855	no	0.0469296	0.960855	Baculoviral IAP repeat-containing protein 6 (EC 2.3.2.27) (BIR repeat-containing ubiquitin-conjugating enzyme) (BRUCE) (RING-type E3 ubiquitin transferase BIRC6) (Ubiquitin-conjugating BIR domain enzyme apollon) (APOLLON)
O88811	Stam2	STAM2_MOUSE	O88811_K202	TB_08H-MOCK_06H	-0.172592	0.808998	0.931769	no	-0.172592	0.931769	Signal transducing adapter molecule 2 (STAM-2) (Hrs-binding protein)
O88839	Adam15	ADA15_MOUSE	O88839_K730	TB_08H-MOCK_06H	0.232487	0.647938	0.878582	no	0.232487	0.878582	Disintegrin and metalloproteinase domain-containing protein 15 (ADAM 15) (EC 3.4.24.-) (AD56) (Metalloprotease RGD disintegrin protein) (Metalloproteinase-like, disintegrin-like, and cysteine-rich protein 15) (MDC-15) (Metargidin)
O88844	Idh1	IDHC_MOUSE	O88844_K151	TB_08H-MOCK_06H	#NUM!		0	yes	-3.93926	0.0486021	Isocitrate dehydrogenase [NADP] cytoplasmic (IDH) (EC 1.1.1.42) (Cytosolic NADP-isocitrate dehydrogenase) (IDP) (NADP(+)-specific ICDH) (Oxalosuccinate decarboxylase)
O88844	Idh1	IDHC_MOUSE	O88844_K381	TB_08H-MOCK_06H	#NUM!		0	yes	-3.50544	0.0124214	Isocitrate dehydrogenase [NADP] cytoplasmic (IDH) (EC 1.1.1.42) (Cytosolic NADP-isocitrate dehydrogenase) (IDP) (NADP(+)-specific ICDH) (Oxalosuccinate decarboxylase)
O88844	Idh1	IDHC_MOUSE	O88844_K236	TB_08H-MOCK_06H	-0.392136	0.45766	0.768972	no	-0.392136	0.768972	Isocitrate dehydrogenase [NADP] cytoplasmic (IDH) (EC 1.1.1.42) (Cytosolic NADP-isocitrate dehydrogenase) (IDP) (NADP(+)-specific ICDH) (Oxalosuccinate decarboxylase)
O88844	Idh1	IDHC_MOUSE	O88844_K126	TB_08H-MOCK_06H	-0.0361015	0.911443	0.966862	no	-0.0361015	0.966862	Isocitrate dehydrogenase [NADP] cytoplasmic (IDH) (EC 1.1.1.42) (Cytosolic NADP-isocitrate dehydrogenase) (IDP) (NADP(+)-specific ICDH) (Oxalosuccinate decarboxylase)
O88844	Idh1	IDHC_MOUSE	O88844_K58	TB_08H-MOCK_06H	-0.654264	0.122864	0.408626	no	-0.654264	0.408626	Isocitrate dehydrogenase [NADP] cytoplasmic (IDH) (EC 1.1.1.42) (Cytosolic NADP-isocitrate dehydrogenase) (IDP) (NADP(+)-specific ICDH) (Oxalosuccinate decarboxylase)
O88958	Gnpda1	GNPI1_MOUSE	O88958_K160	TB_08H-MOCK_06H	-0.0630278	0.856238	0.947729	no	-0.0630278	0.947729	Glucosamine-6-phosphate isomerase 1 (EC 3.5.99.6) (Glucosamine-6-phosphate deaminase 1) (GNPDA 1) (GlcN6P deaminase 1) (Oscillin)
O88958	Gnpda1	GNPI1_MOUSE	O88958_K256	TB_08H-MOCK_06H	-0.621554	0.214827	0.534146	no	-0.621554	0.534146	Glucosamine-6-phosphate isomerase 1 (EC 3.5.99.6) (Glucosamine-6-phosphate deaminase 1) (GNPDA 1) (GlcN6P deaminase 1) (Oscillin)
O88990	Actn3	ACTN3_MOUSE	P57780_K126,Q7TPR4_K106,O88990_K119	TB_08H-MOCK_06H	-0.62045	0.621335	0.871881	no	-0.62045	0.871881	Alpha-actinin-3 (Alpha-actinin skeletal muscle isoform 3) (F-actin cross-linking protein)
O88990	Actn3	ACTN3_MOUSE	P57780_K123,Q7TPR4_K103,O88990_K116	TB_08H-MOCK_06H	-0.140776	0.775586	0.916214	no	-0.140776	0.916214	Alpha-actinin-3 (Alpha-actinin skeletal muscle isoform 3) (F-actin cross-linking protein)
O89051	Itm2b	ITM2B_MOUSE	O89051_K13	TB_08H-MOCK_06H	-3.88922	1.09975e-06	6.10359e-05	no	-3.88922	6.10359e-05	Integral membrane protein 2B (Immature BRI2) (imBRI2) (Protein E25B) (Transmembrane protein BRI) (Bri) [Cleaved into: BRI2, membrane form (Mature BRI2) (mBRI2); BRI2 intracellular domain (BRI2 ICD); BRI2C, soluble form; Bri23 peptide (Bri2-23) (ABri23) (C-terminal peptide) (P23 peptide)]
O89051	Itm2b	ITM2B_MOUSE	O89051_K3	TB_08H-MOCK_06H	-0.464356	0.140896	0.432927	no	-0.464356	0.432927	Integral membrane protein 2B (Immature BRI2) (imBRI2) (Protein E25B) (Transmembrane protein BRI) (Bri) [Cleaved into: BRI2, membrane form (Mature BRI2) (mBRI2); BRI2 intracellular domain (BRI2 ICD); BRI2C, soluble form; Bri23 peptide (Bri2-23) (ABri23) (C-terminal peptide) (P23 peptide)]
O89053	Coro1a	COR1A_MOUSE	Q9WUM3_K339,O89053_K339	TB_08H-MOCK_06H	#NUM!		0	yes	-2.30591	0.0145313	Coronin-1A (Coronin-like protein A) (Clipin-A) (Coronin-like protein p57) (Tryptophan aspartate-containing coat protein) (TACO)
P01108	Myc	MYC_MOUSE	P01108_K149	TB_08H-MOCK_06H	#NUM!		0	yes	-3.61473	0.0193912	Myc proto-oncogene protein (Proto-oncogene c-Myc) (Transcription factor p64)
P01896	P01896	HA1Z_MOUSE	P01899_K340,P01897_K340,P01896_K150	TB_08H-MOCK_06H	0.0650763	0.925893	0.971286	no	0.0650763	0.971286	H-2 class I histocompatibility antigen, alpha chain (Clone PH-2D-2) (Fragment)
P01897	H2-L	HA1L_MOUSE	P01899_K361,P01897_K361	TB_08H-MOCK_06H	0.200604	0.747486	0.910083	no	0.200604	0.910083	H-2 class I histocompatibility antigen, L-D alpha chain
P01901	H2-K1	HA1B_MOUSE	P14428_K297,P03991_K337,P04223_K338,P01901_K338	TB_08H-MOCK_06H	0.617286	0.469815	0.781265	no	0.617286	0.781265	H-2 class I histocompatibility antigen, K-B alpha chain (H-2K(B))
P02301	H3f3c	H3C_MOUSE	P84244_K38,P02301_K38	TB_08H-MOCK_06H	0.48393	0.539069	0.823205	no	0.48393	0.823205	Histone H3.3C (Embryonic)
P02301	H3f3c	H3C_MOUSE	P84244_K28,P02301_K28	TB_08H-MOCK_06H	-0.659068	0.24914	0.572531	no	-0.659068	0.572531	Histone H3.3C (Embryonic)
[truncated: 1,703 more rows]

## Sheet: 6H
Protein	Gene	Entry.name	Uniprot_PTM	Comparison	log2FC	pvalue	adj.pvalue	imputed	iLog2FC	iPvalue	Protein.names
[truncated: 1,736 more rows]

[truncated: 2 more sheets: 4H, 2H]
