# Supplementary material for: Dynamic post-translational modification profiling of Mycobacterium tuberculosis-infected primary macrophages
Source: eLife. 2020 Jan 17;9:e51461. doi: 10.7554/eLife.51461 (PMC7030789; doi:10.7554/eLife.51461)
Supplement: Supplementary file 7. [file elife-51461-supp7.xlsx]

## Sheet: Fig 5
Antibody	genotype #1	genotype #2	p value
Ub	scramble	p62-/-	1e-06
Ub	scramble	Tax1bp1-/-	1e-06
pTBK1	scramble	p62-/-	0.92451
pTBK1	scramble	Tax1bp1-/-	0.002158
p62	scramble	p62-/-	<0.000001
p62	scramble	Tax1bp1-/-	0.000408

## Sheet: Fig 5-Fig S1
Antibody	genotype #1	genotype #2	p value
p62	scramble	tax1bp1 exon 10	0.0021
p62	scramble	tax1bp1 exon 9	0.006
Ub	scramble	tax1bp1 exon 10	0.0162
Ub	scramble	tax1bp1 exon 9	0.0002
pTBK1	scramble	tax1bp1 exon 10	0.0003
pTBK1	scramble	tax1bp1 exon 9	0.0289

## Sheet: Fig 6
Fig 6B
genotype #1	genotype #2	p value
wild-type	Tax1bp1-/-	0.005
wild-type	p62-/-	0.0006
scramble	Tax1bp1 exon 10	0.0287
scramble	Tax1bp1 exon 9	0.0219
Fig 6C
genotype #1	genotype #2	day post-infection	p value
wild-type	Tax1bp1-/-	1	0.999999
		3	0.030921
		5	0.046687
Fig 6D
genotype #1	genotype #2	day post-infection	p value
wild-type	Tax1bp1-/-	1	0.387539
		2	0.086264
		3	0.006443
		4	0.000233
Fig 6E
genotype #1	genotype #2	day post-infection	p value
wild-type	Tax1bp1-/-	1	0.000444
		2	0.009076
		3	0.00716

## Sheet: Fig 6-Fig S1
genotype #1	genotype #2	condition	p value
wild-type	p62-/-	unstimulated	0.013
wild-type	Tax1bp1-/-	unstimulated	0.0308
wild-type	p62-/-	IFN-g post-infection	<0.0001
wild-type	Tax1bp1-/-	IFN-g post-infection	<0.0001
wild-type	p62-/-	IFN-g pre- & post-infection	0.162
wild-type	Tax1bp1-/-	IFN-g pre- & post-infection	0.0382

## Sheet: Fig 6-Fig S2
Fig 6-Fig S2B
genotype #1	genotype #2	condition	p value
wild-type	Tax1bp1-/-	uninfected	0.744902
wild-type	Tax1bp1-/-	Mtb	0.016852
Fig 6-Fig S2C
cytokine	genotype #1	genotype #2	condition	p value
IL-12	wild-type	Tax1bp1-/-	uninfected	0.4174
IL-12	wild-type	Tax1bp1-/-	Mtb	0.6672
IL-6	wild-type	Tax1bp1-/-	uninfected	0.5121
IL-6	wild-type	Tax1bp1-/-	Mtb	0.5218
TNF-a	wild-type	Tax1bp1-/-	uninfected	0.0709
TNF-a	wild-type	Tax1bp1-/-	Mtb	0.4811
